# Supplementary material for: Natural-Product-Directed Catalytic Stereoselective Synthesis of Functionalized Fused Borane Cluster–Oxazoles for the Discovery of Bactericidal Agents
Source: PubMed Central journal article supplement — ACS Cent Sci. 2022 Feb 11;8(3):322–31. doi: 10.1021/acscentsci.1c01132 (PMC8949637; doi:10.1021/acscentsci.1c01132), 2022-02-11

## Supporting Information for

# Natural Product-Directed Catalytic Stereoselective Synthesis of Functionalized Fused Borane Cluster–Oxazoles for the Discovery of Bactericidal Agents

Rajesh Varkhedkar<sup>a‡</sup>, Fan Yang<sup>b‡</sup>, Rakesh Dontha<sup>a‡</sup>, Jianglin Zhang<sup>b</sup>, Jiyong Liu<sup>a</sup>, Bernhard Spingler<sup>c</sup>, Stijn van der Veen<sup>b\*</sup>, and Simon Duttwyler<sup>a\*</sup>

<sup>a</sup>Department of Chemistry, Zhejiang University, 38 Zheda Road, 310027 Hangzhou, China

<sup>b</sup>Department of Microbiology and Parasitology, and Department of Dermatology, Sir Run Run Shaw Hospital, School of Medicine, Zhejiang University, 866 Yuhangtang Road, 310058 Hangzhou, China

<sup>c</sup>Department of Chemistry, University of Zurich, Winterthurerstrasse 190, 8057 Zurich, Switzerland

\*Email: [stijnvanderveen@zju.edu.cn](mailto:stijnvanderveen@zju.edu.cn)

\*Email: [duttwyler@zju.edu.cn](mailto:duttwyler@zju.edu.cn)

‡These authors contributed equally to this paper

## Table of Contents

|             |                                          |                       |
|-------------|------------------------------------------|-----------------------|
| <b>I</b>    | <b>General Information</b>               | <b>p. S2–S10</b>      |
| <b>II</b>   | <b>Experimental Section</b>              | <b>p. S11–S42</b>     |
| <b>III</b>  | <b>X-ray Crystallography</b>             | <b>p. S43–S46</b>     |
| <b>IV</b>   | <b>Antimicrobial Testing</b>             | <b>p. S47–S49</b>     |
| <b>V</b>    | <b>References</b>                        | <b>p. S50</b>         |
| <b>VI</b>   | <b>NMR spectra</b>                       | <b>p. NMR1–NMR229</b> |
| <b>VII</b>  | <b>Determination of <i>dr</i> values</b> | <b>p. DR1–DR40</b>    |
| <b>VIII</b> | <b>Mass spectra</b>                      | <b>p. MS1–MS29</b>    |

## I General Information

### Chemicals

If not otherwise specified, reagents and organic solvents were commercially available and used without further purification. Anhydrous solvents were prepared by passage through activated  $\text{Al}_2\text{O}_3$  and stored over 3 Å molecular sieves. Acetone- $d_6$  was purchased from Cambridge Isotope Laboratories.  $[\text{Et}_3\text{NH}][\text{B}_{12}\text{H}_{11}\text{NH}_3]$  (aminododecaborate starting material) was prepared according to the literature.[1,2]

### Reaction conditions

Glassware for air-sensitive reactions was dried at 150 °C and allowed to cool in a vacuum. Reactions that were carried out in a glovebox were run under a nitrogen atmosphere with  $\text{O}_2 < 1$  ppm and  $\text{H}_2\text{O} < 1$  ppm.

### Characterization

Thin-layer chromatography (TLC) was carried out using silica gel 60, F254 with a thickness of 0.25 mm. Column chromatography was performed on silica gel 60 (200-300 mesh).

Low-resolution ESI-MS data were recorded on Advion Expression CMS instrument.

High-resolution MS data were recorded using IT-TOF detection (Shimadzu, Japan) equipped with an electrospray ionization source (ESI).

Single-crystal X-ray diffraction studies were performed on an Oxford Diffraction Gemini A Ultra diffractometer equipped with an 135mm Atlas CCD detector and using Mo K- $\alpha$  radiation.

NMR spectra were recorded on a Bruker AVANCE III 400 spectrometer ( $^1\text{H}$  NMR 400.13 MHz,  $^{13}\text{C}$  NMR 100.62 MHz,  $^{11}\text{B}$  NMR 128.38 MHz) at the temperature indicated. Data are reported as follows: Chemical shift in ppm, multiplicity (s = singlet, d = doublet, t = triplet, q = quartet, m = multiplet, dd = doublet of doublets, etc.), coupling constant  $J$  in Hz, integration, and (where applicable) interpretation. Signals were referenced against solvent peaks ( $^1\text{H}$ : residual  $\text{CHD}_2\text{C}(\text{O})\text{CD}_3 = 2.05$  ppm,  $^{13}\text{C}\{^1\text{H}\}$ :  $\text{CD}_3\text{C}(\text{O})\text{CD}_3 = 29.84$  ppm.  $^{11}\text{B}$  and  $^{11}\text{B}\{^1\text{H}\}$  NMR spectra were calibrated against external  $\text{BF}_3 \cdot \text{Et}_2\text{O} = 0$  ppm ( $\text{BF}_3 \cdot \text{Et}_2\text{O}$  capillary in  $\text{C}_6\text{D}_6$ ). All processing was performed using the software TopSpin.

## Additional remarks about the NMR spectra

### a) Double water peaks

In certain  $^1\text{H}$  and  $^1\text{H}\{^{11}\text{B}\}$  NMR spectra measured in acetone- $d_6$ , double water peaks were observed. This is a result of different resonances from  $\text{H}_2\text{O}$  and HOD and has been described in the literature.[3] In our experience, the appearance of double water peaks depends on the temperature, water content and compound being measured. A spectrum of acetone- $d_6$  solvent as received from Cambridge Isotope Laboratories in which the distinct resonances of  $\text{H}_2\text{O}$  and HOD are visible is shown in Figure S1.

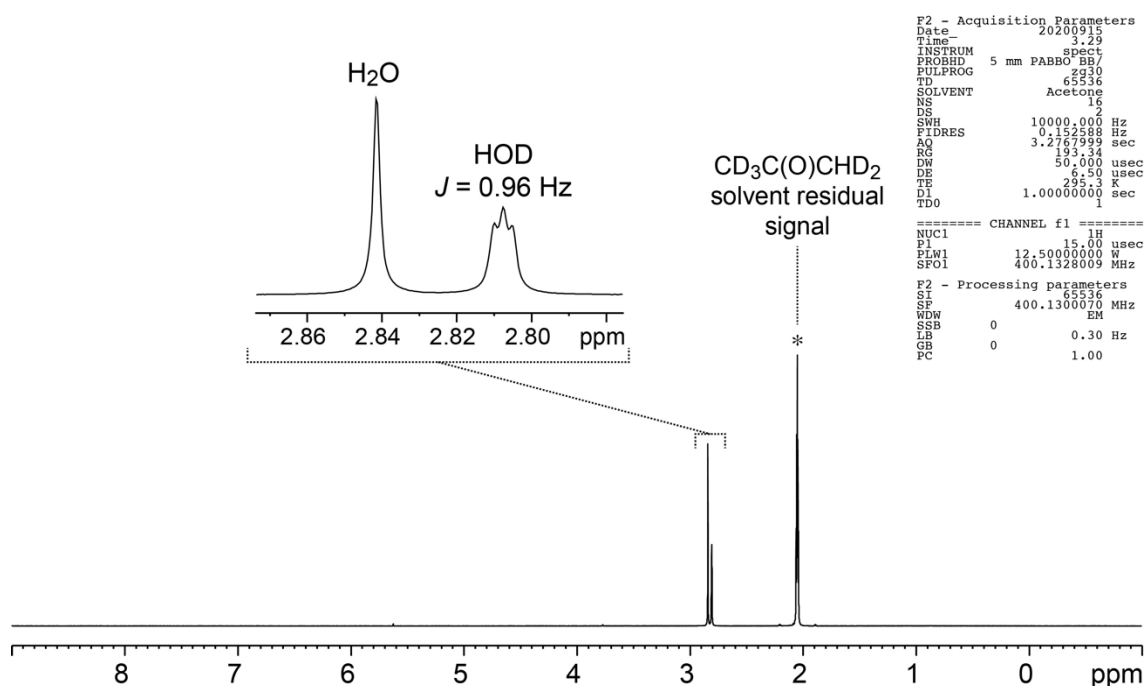

**Figure S1.**  $^1\text{H}$  NMR spectrum of acetone- $d_6$  solvent as received from Cambridge Isotope Laboratories (400 MHz, 22 °C).

b) Detection of B–C signals

In the  $^{13}\text{C}\{^1\text{H}\}$  NMR spectra of the products **13** and **14**, the B–C signal appeared severely broadened because of coupling to the quadrupolar nuclei  $^{10}\text{B}$  and  $^{11}\text{B}$ . Therefore, only weak signals were observed, making direct detection difficult. This phenomenon is illustrated in Figure S2.

Indirect detection of the B–C carbon atom was successful using  $^1\text{H}$ - $^{13}\text{C}$  HSQC NMR spectroscopy. In these spectra, the correlation signal caused by  $^1J_{\text{H,C}}$  coupling between B– $\text{CH}_2$  and B–C revealed the chemical shift of the B–C position, which was uniformly observed at 19–20 ppm. This kind of detection is displayed for product **13a** in Figures S3 and S4.

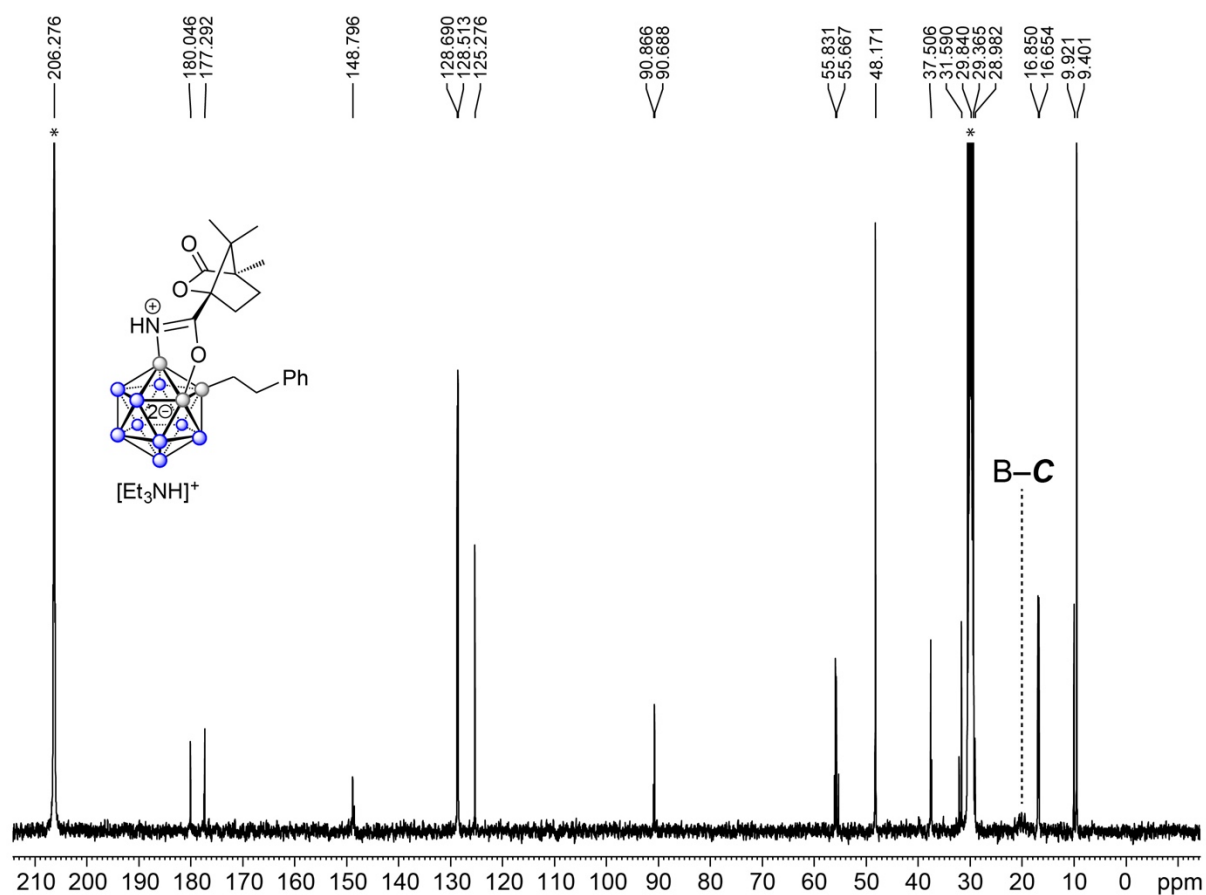

**Figure S2.**  $^{13}\text{C}\{^1\text{H}\}$  NMR spectrum of **13a** (acetone- $d_6$ , 101 MHz, 23 °C). The B–C signal is weak and broadened because of coupling to the quadrupolar nuclei  $^{10}\text{B}$  and  $^{11}\text{B}$ .

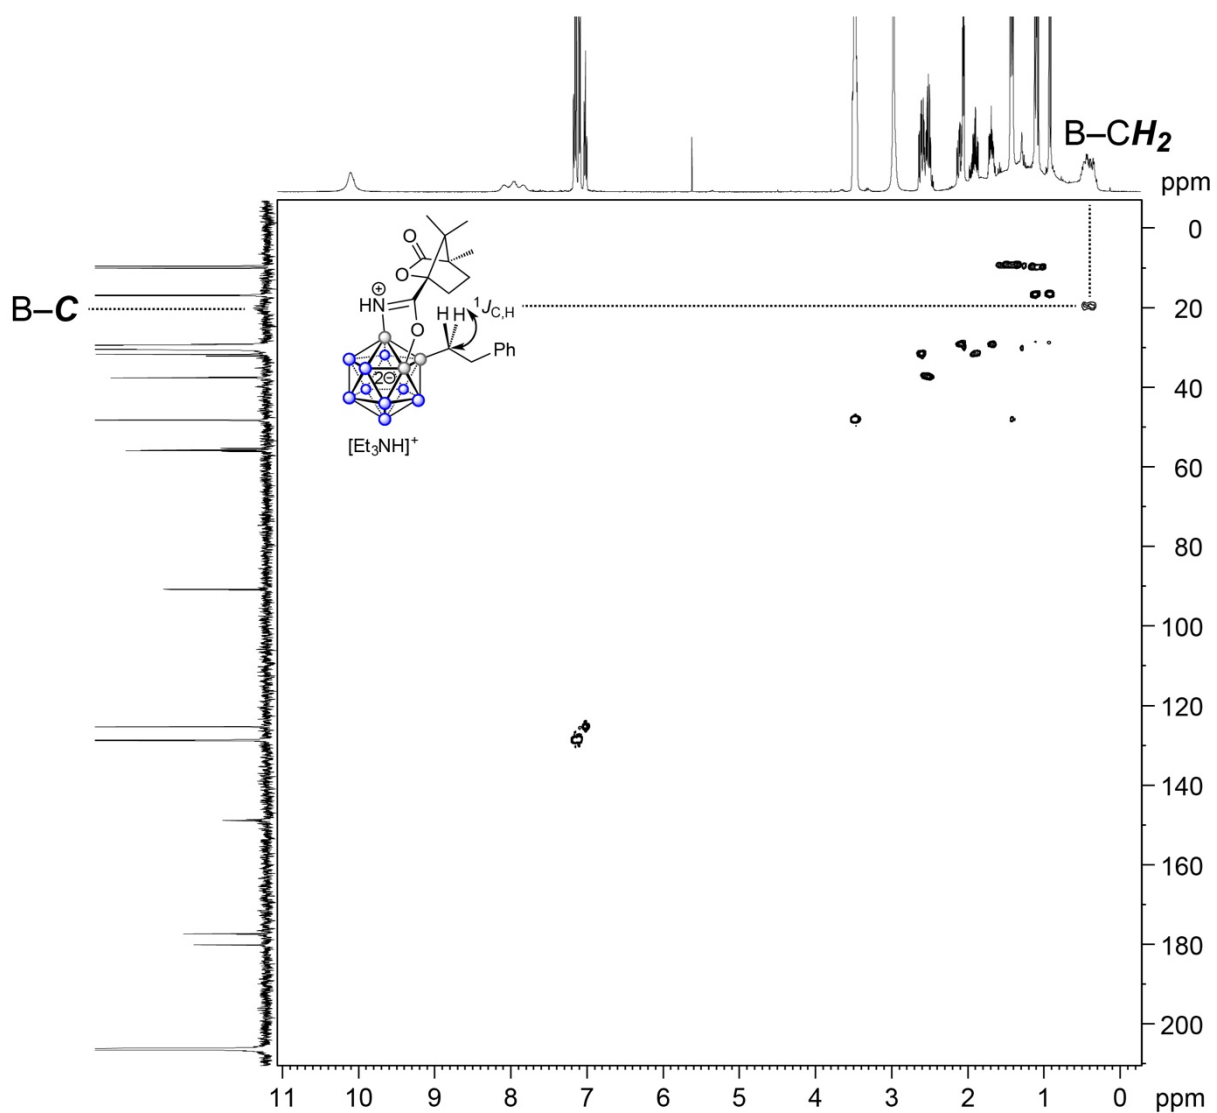

**Figure S3.**  $^1\text{H}$ - $^{13}\text{C}$  HSQC NMR spectrum of **13a** showing indirect detection of the B-C resonance based on the correlation signal caused by  $^1J_{\text{H,C}}$  coupling (400/101 MHz, acetone- $d_6$ , 23 °C).

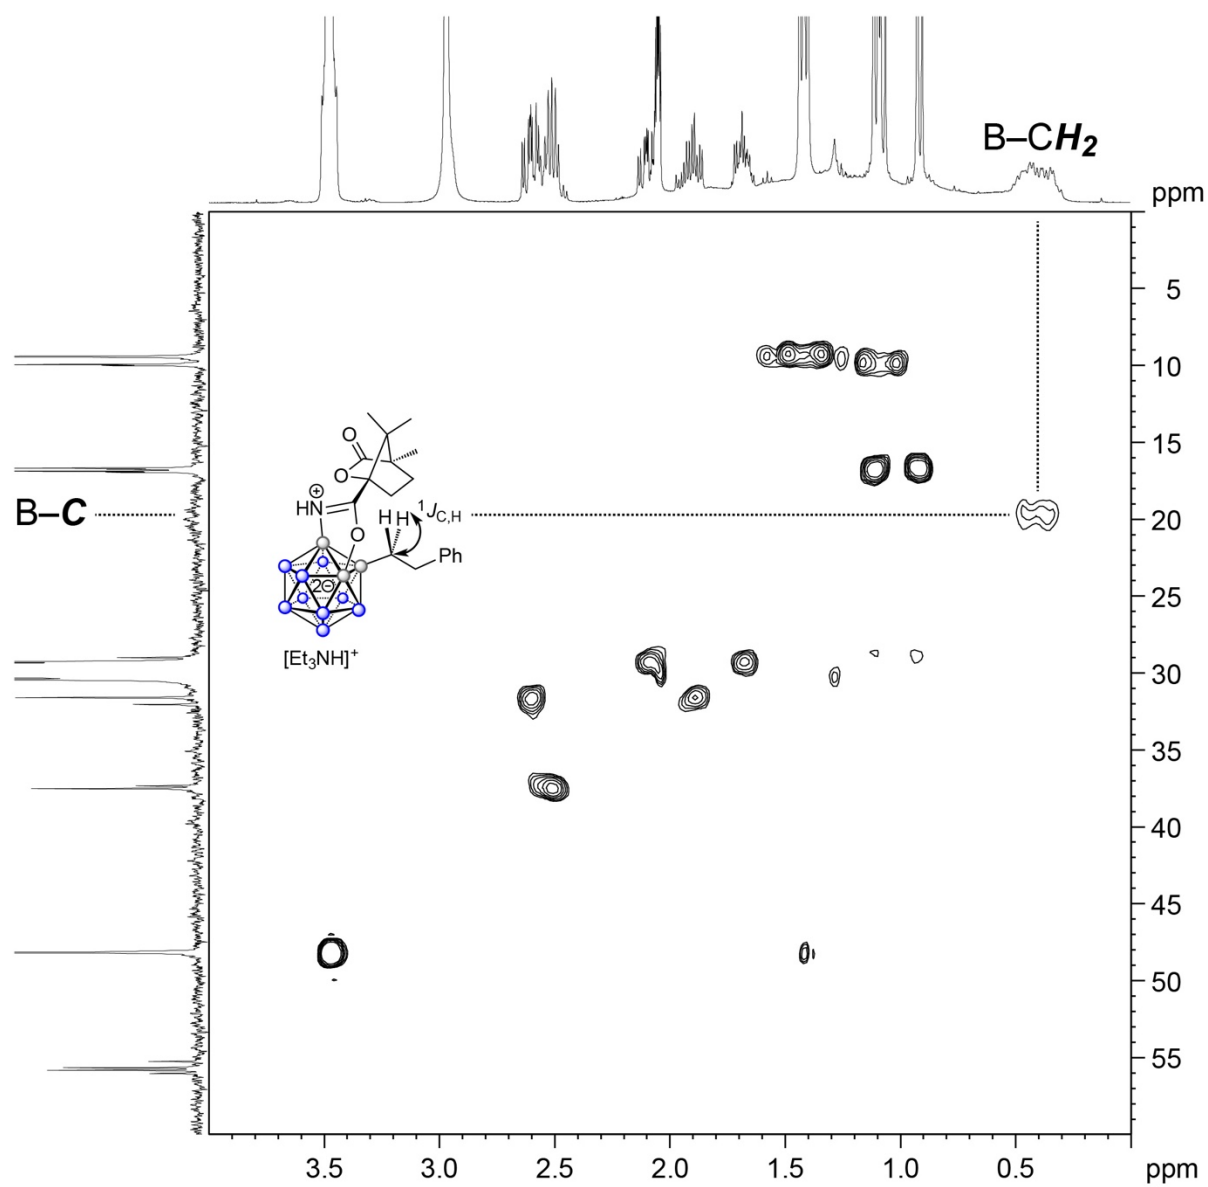

**Figure S4.** Detail of the  $^1\text{H}$ - $^{13}\text{C}$  HSQC NMR spectrum of **13a** displayed in Figure S3.

c) Chemical shift assignment and determination of *dr* values

A detailed assignment of  $^1\text{H}$  and  $^{13}\text{C}$  chemical shifts for **13a** and **14a** was carried out on the basis of 1D/2D NMR measurements as well as reported values for camphanic acid and menthol (Figures S5 and S6).[4]

For products **13**, resonances at  $\delta(^1\text{H})$  0.93 ppm,  $\delta(^{13}\text{C})$  32 ppm and  $\delta(^{13}\text{C})$  37 ppm were used for the determination of diastereomeric ratios. For products **14**, resonances at  $\delta(^1\text{H})$  0.79 ppm,  $\delta(^{13}\text{C})$  21 ppm and  $\delta(^{13}\text{C})$  82 ppm were used for the determination of diastereomeric ratios.

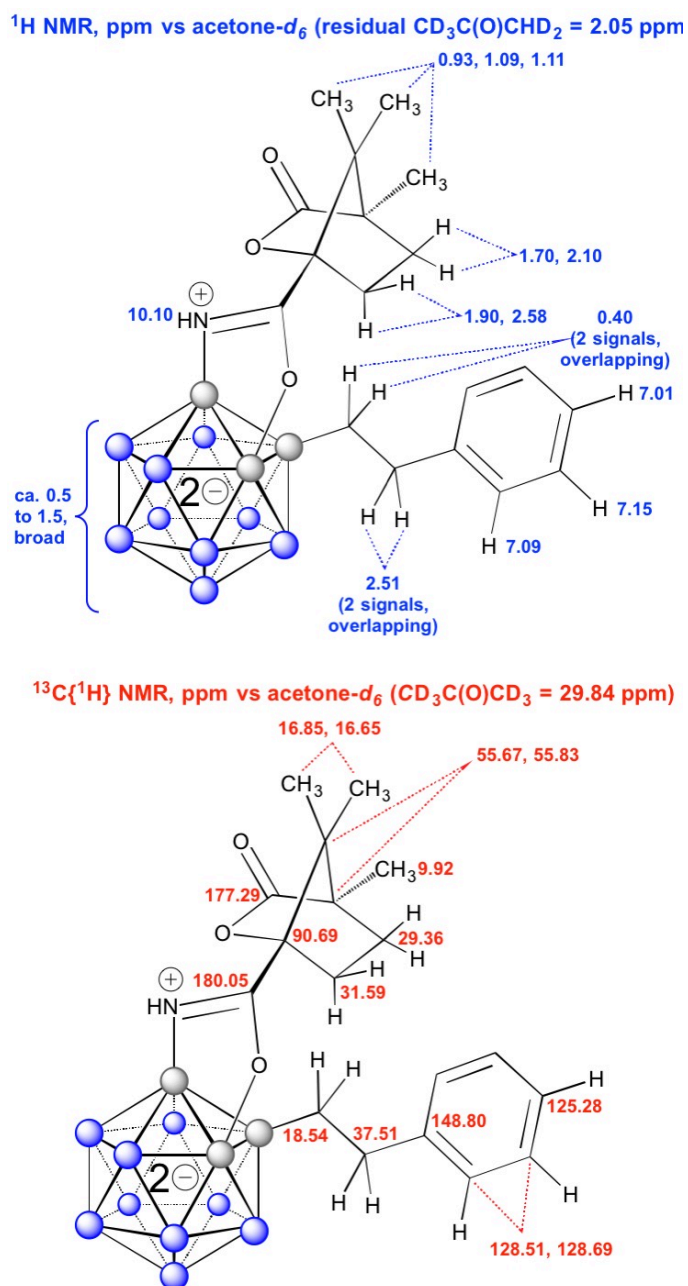

**Figure S5.**  $^1\text{H}$  and  $^{13}\text{C}$  NMR shifts of **13a** (400/101 MHz, acetone- $d_6$ , 23 °C).

$^1\text{H}$  NMR, ppm vs acetone- $d_6$  (residual  $\text{CD}_3\text{C}(\text{O})\text{CHD}_2 = 2.05$  ppm)

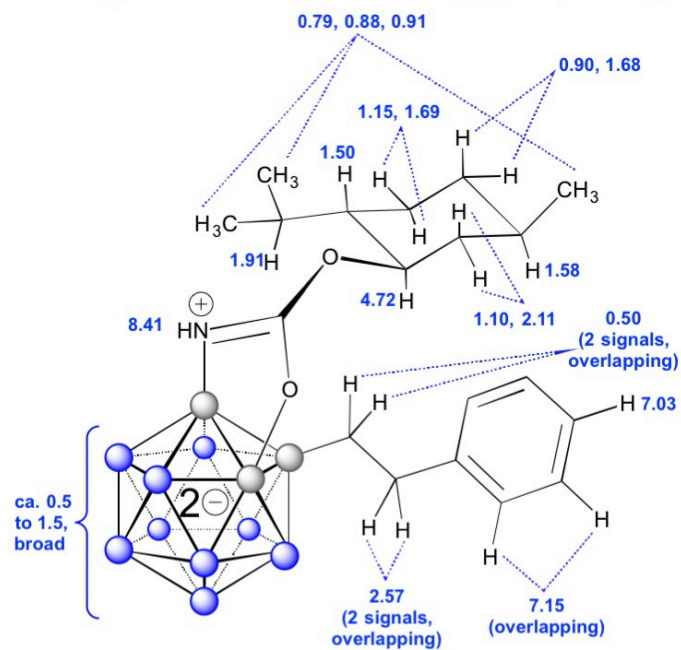

$^{13}\text{C}\{^1\text{H}\}$  NMR, ppm vs acetone- $d_6$  ( $\text{CD}_3\text{C}(\text{O})\text{CD}_3 = 29.84$  ppm)

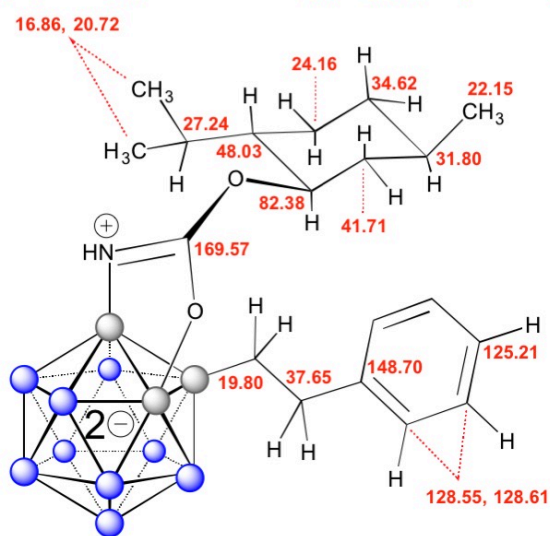

**Figure S6.**  $^1\text{H}$  and  $^{13}\text{C}$  NMR shifts of **14a** (400/101 MHz, acetone- $d_6$ , 23 °C).



## Proposed mechanism for the transformation of 10/11 to 13/14

On the basis of previously reported results, a possible mechanism of the reaction is proposed in Scheme S1.[5] The dimeric rhodium precatalyst first dissociates into a more active monomeric species  $[\text{RhCp}^*\text{L}_n]$  ( $\text{L} = \text{Cl}^-$ ,  $\text{AcO}^-$  or  $\text{MeCN}$ ), which then forms the agostic complex **I**. Acetate-mediated B–H activation affords six-membered rhodacycle **II** with concomitant formation of acetic acid. Subsequent alkene coordination/insertion leads to intermediate **III**, which can undergo protonation of the C–Rh bond, followed by a Rh shift to give complex **IV**. A second acetate-mediated B–H activation step gives rise to rhodacycle **V**, from which the products **13/14** are released by reductive elimination/cyclization. In a final step,  $\text{Cu(II)}$  reoxidizes  $\text{Rh(I)}$  to  $\text{Rh(III)}$ , which then enters a new catalytic cycle.

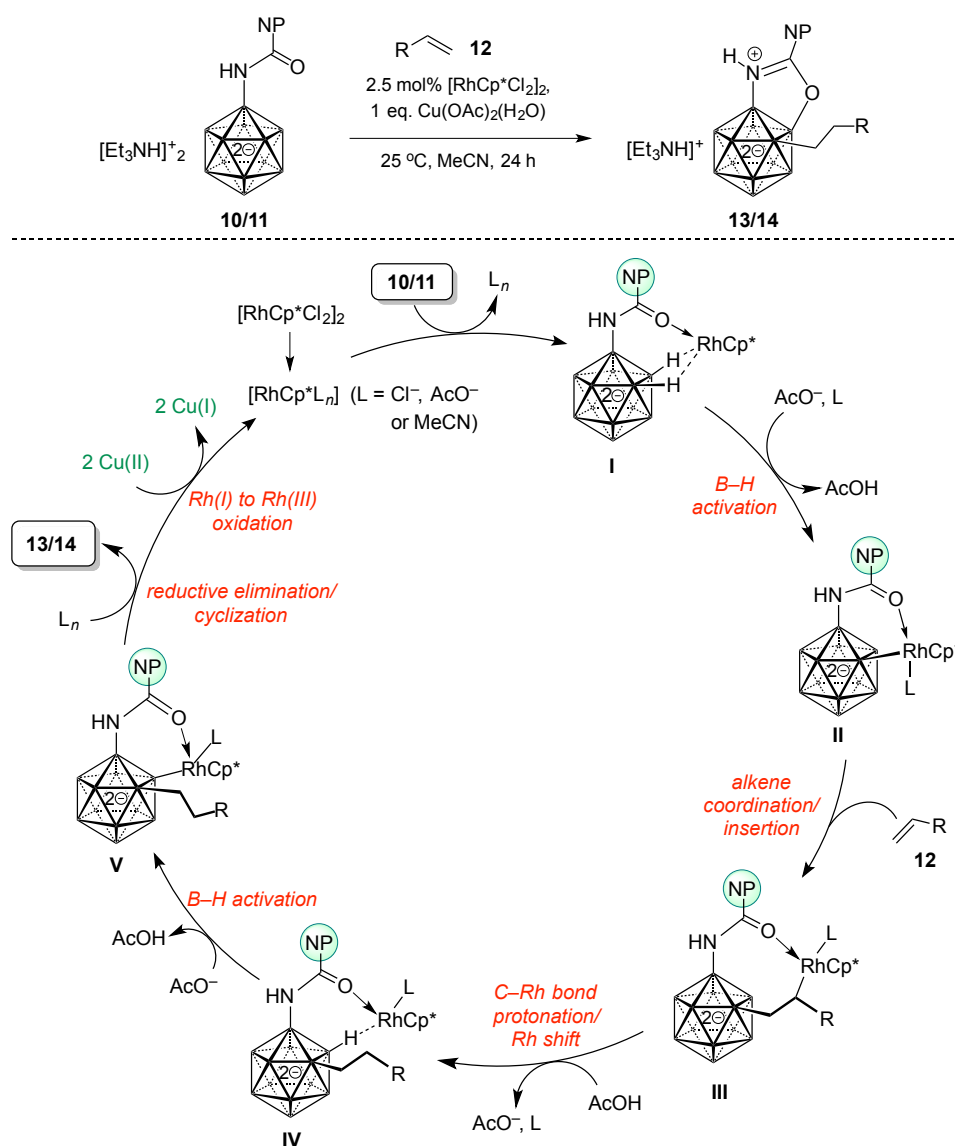

**Scheme S1.** Proposed catalytic cycle for the transformation of **10/11** to **13/14**.

Generation of  $R_{\text{cage}}$  and  $S_{\text{cage}}$  diastereoisomers begins with the formation of the two agostic-like complexes **IVa** and **IVb** from intermediate **III** (Scheme S2). The camphanic and menthyl directing groups create a chiral environment, rendering **IVa** and **IVb** diastereomeric; these two species are probably in an equilibrium on a laboratory time scale at room temperature. Subsequent B–H activation affords rhodacycles  $S_{\text{cage}}\text{-V}$  and  $R_{\text{cage}}\text{-V}$ , which upon reductive elimination/cyclization provide the final products  $R_{\text{cage}}\text{-13/14}$  and  $S_{\text{cage}}\text{-13/14}$ .

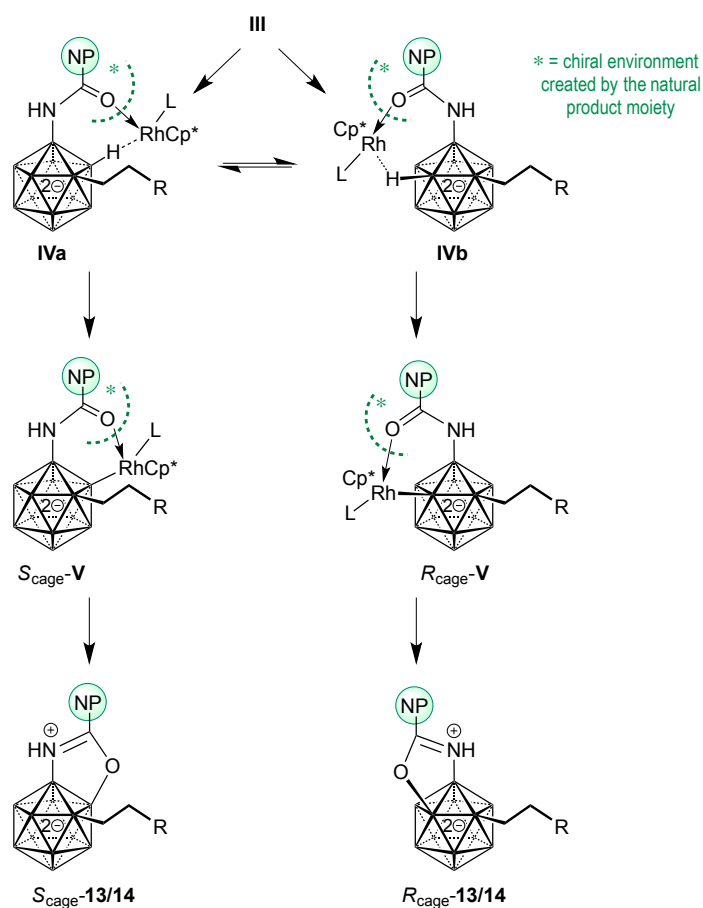

**Scheme S2.** Formation of diastereoisomers  $R_{\text{cage}}\text{-13/14}$  and  $S_{\text{cage}}\text{-13/14}$  induced by the chiral natural product moiety.

## II Experimental Section

### SAFETY STATEMENT:

No new or significant hazards or risks are associated with the reported work.

### General procedure for the synthesis of **10** and **11**

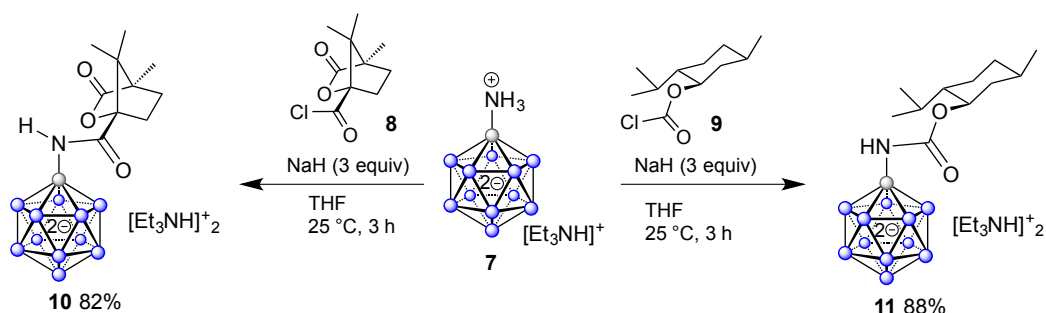

In a glovebox, a dry 20 mL vial, equipped with a stir bar, was charged with  $[\text{Et}_3\text{NH}][\text{B}_{12}\text{H}_{11}\text{NH}_3]$  (**7**) (0.80 mmol, 1 equiv) and  $\text{NaH}$  (2.5 mmol, 3.1 equiv). Then anhydrous THF (6 mL) was added. The suspension was stirred at  $25\text{ }^\circ\text{C}$  for 30 min until hydrogen formation ceased. A solution of **8** or **9** (0.9 mmol, 1.1 equiv) in anhydrous THF (1 mL) was added dropwise by a plastic syringe over 30 min. The mixture was stirred at  $25\text{ }^\circ\text{C}$  for another 2 hours. The vial was transferred to a fumehood. The reaction was quenched with an aqueous  $[\text{Et}_3\text{NH}]\text{Cl}$  solution (10 mL  $\text{H}_2\text{O}$  + 2 equiv  $[\text{Et}_3\text{NH}]\text{Cl}$ ); the pH value at this point was ca. 7–8. The mixture was extracted with  $\text{CH}_2\text{Cl}_2/\text{MeCN} = 4 : 1$  (8 x 10 mL). The combined organic layers were dried over anhydrous  $\text{Na}_2\text{SO}_4$ , and the solution was filtered and concentrated by rotary evaporation. The cloudy residue was purified by silica gel column chromatography (eluent  $\text{CH}_2\text{Cl}_2/\text{MeCN} = 4 : 3$ , fraction size 20 mL). The combined eluates were concentrated on a rotary evaporator and dried under vacuum overnight at  $60\text{ }^\circ\text{C}$  to afford compounds **10** and **11** as colorless solids.

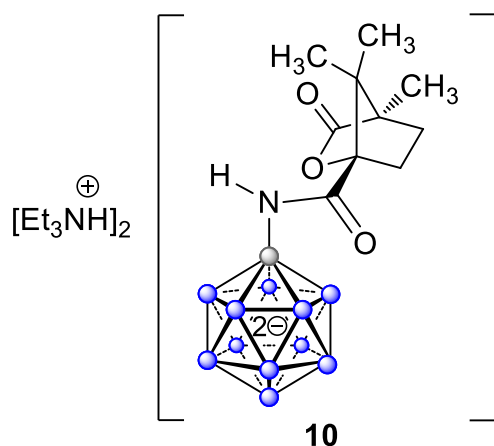

Product **10**: 82% yield

$^1\text{H}\{^{11}\text{B}\}$  NMR (400 MHz, acetone- $d_6$ , 23 °C):  $\delta$  8.31 (br, 2H, cationic NH), 6.24 (br, 1H, NH), 3.41 (q,  $J = 7.3$  Hz, 12H, cationic N-CH<sub>2</sub>), 2.58-2.45 (m, 1H, camphanic CH), 1.99-1.89 (m, 1H, camphanic CH), 1.6-0.60 (broad overlapping m, 11H, BH), 1.80-.68 (m, 1H, camphanic CH), 1.62-1.50 (m, 1H, camphanic CH), 1.38 (t,  $J = 7.3$  Hz, 18H, cationic N-CH<sub>2</sub>-CH<sub>3</sub>), 1.07 (s, 3H, camphanic CH<sub>3</sub>), 1.02 (s, 3H, camphanic CH<sub>3</sub>), 0.86 (s, 3H, camphanic CH<sub>3</sub>).

$^{13}\text{C}\{^1\text{H}\}$  NMR (100 MHz, acetone- $d_6$ , 23 °C):  $\delta$  178.67 (C=O), 168.49 (C=O), 93.92, 55.91, 54.09 (3 camphanic C), 47.82 (cationic CH<sub>2</sub>), 30.59, 29.92 (2 camphanic CH<sub>2</sub>), 17.41, 17.06, 10.12 (3 camphanic CH<sub>3</sub>), 9.17 (cationic CH<sub>3</sub>).

$^{11}\text{B}\{^1\text{H}\}$  NMR (128 MHz, acetone- $d_6$ , 23 °C):

$\delta$ - 5.67 (1B, B-N), -13.50 to -17.50 (10B, BH), -18.69 (1B, BH).

High resolution ESI-MS (negative mode, MeOH):  $m/z$  calcd for [C<sub>11</sub>H<sub>30</sub>B<sub>12</sub>NO<sub>2</sub>]<sup>-</sup>: 336.2945;  
Found: 336.2949.

The reported signal corresponds to [**10**<sup>2-</sup> - H]<sup>-</sup>, *i.e.*, the molecule after losing one hydride.

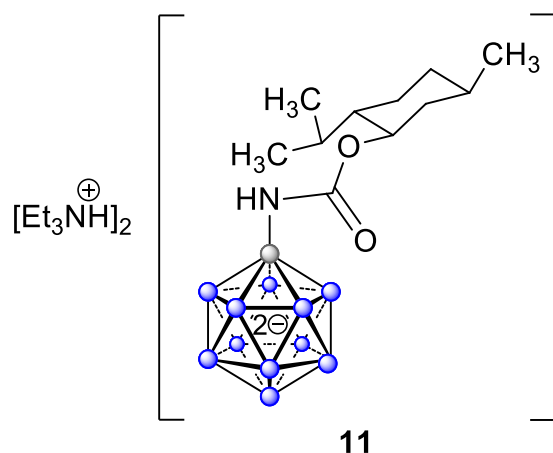

Product **11**: 88% yield

$^1\text{H}\{^{11}\text{B}\}$  NMR (400 MHz, acetone- $d_6$ , 23 °C):  $\delta$  8.10 (br, 2H, cationic NH), 4.42 (s, 1H, NH), 4.29 (ddd,  $J = 10.8, 10.8, 4.2$  Hz, 1H, menthyl CH), 3.39 (q,  $J = 7.3$  Hz, 12H, cationic N- $\text{CH}_2$ ), 2.03-1.89 (m, 2H, 2 menthyl CH), 1.75-0.60 (broad overlapping m, 18H, 7 menthyl CH and 11 BH), 1.38 (t,  $J = 7.3$  Hz, 18H, cationic  $\text{CH}_3$ ), 0.88 (d,  $J = 3.7$  Hz, 3H, menthyl  $\text{CH}_3$ ), 0.86 (d,  $J = 4.4$  Hz, 3H, menthyl  $\text{CH}_3$ ), 0.75 (d,  $J = 7.0$  Hz, 3H, menthyl  $\text{CH}_3$ ).

$^{13}\text{C}\{^1\text{H}\}$  NMR (100 MHz, acetone- $d_6$ , 23 °C):  $\delta$  158.46 (C=O), 73.21 (menthyl CH), 48.05 (menthyl CH), 47.77 (cationic  $\text{CH}_2$ ), 42.84, 35.15 (2 menthyl  $\text{CH}_2$ ), 32.14, 26.70 (2 menthyl CH), 24.31 (menthyl  $\text{CH}_2$ ), 22.48, 21.03, 16.91 (3 menthyl  $\text{CH}_3$ ), 9.11 (cationic  $\text{CH}_3$ ).

$^{11}\text{B}\{^1\text{H}\}$  NMR (128 MHz, acetone- $d_6$ , 23 °C):  $\delta$  -4.72 (1B, B-N), -13.48 to -17.75 (10B, BH), -19.52 (1B, BH).

High resolution ESI-MS (negative mode, MeOH):  $m/z$  calcd for  $[\text{C}_{11}\text{H}_{30}\text{B}_{12}\text{NO}_2]^-$ : 338.3465; Found: 338.3475.

The reported signal corresponds to  $[\mathbf{11}^{2-} - \text{H}^-]^-$ , *i.e.*, the molecule after losing one hydride.

## General Procedure for the synthesis of substituted oxazole-fused *closo*-dodecaborates

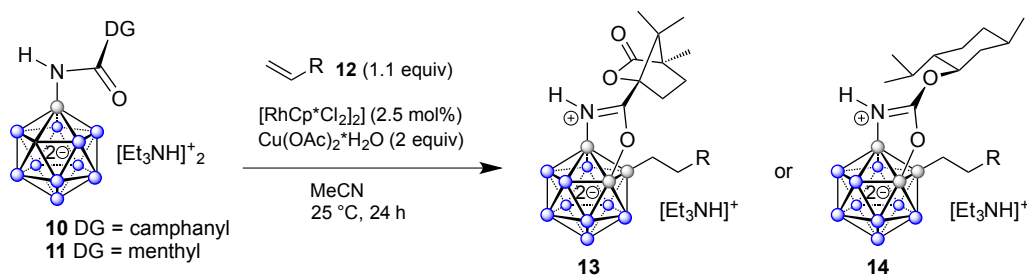

A 20 mL glass vial was charged with **10** or **11** (0.20 mmol, 1 equiv), olefin **12** (0.22 mmol, 1.1 equiv), [RhCp\*Cl<sub>2</sub>]<sub>2</sub> (5 μmol, 2.5 mol% of Rh dimer), Cu(OAc)<sub>2</sub>·H<sub>2</sub>O (0.40 mmol, 2 equiv) and a magnetic stir bar. Then CH<sub>3</sub>CN (6 mL) was added, and the mixture was stirred at 25 °C for 12 hours; the reaction was monitored by TLC. After completion, the reaction mixture was extracted with hexane (4 x 10 mL) to remove excess of olefin, which facilitated separation by column chromatography. The residual solution was transferred to a 50 mL round-bottom flask and concentrated on a rotary evaporator. The residue was dissolved in CH<sub>2</sub>Cl<sub>2</sub> (8 mL), transferred to a 25 mL separation funnel, and saturated aqueous [NH<sub>4</sub>]Cl solution (10 mL) was added. The CH<sub>2</sub>Cl<sub>2</sub> layer was collected in a 100 mL flask. The aqueous layer was extracted with CH<sub>2</sub>Cl<sub>2</sub> (5 x 10 mL). The combined organic layers were washed with brine (50 mL), and the brine layer was re-extracted with CH<sub>2</sub>Cl<sub>2</sub> (40 mL). The combined organic layers were dried over anhydrous Na<sub>2</sub>SO<sub>4</sub>, filtered into a 200 mL one-necked round-bottom flask and concentrated on a rotary evaporator. The residue was purified by silica gel column chromatography (gradient elution with CH<sub>2</sub>Cl<sub>2</sub>/MeCN = 10:1 to CH<sub>2</sub>Cl<sub>2</sub>/MeCN = 5:1, fraction size 10–20 mL). The combined eluates were concentrated on a rotary evaporator and then dried overnight under vacuum at 60 °C to afford products **13a–k** and **14a–n** as colorless to slightly yellow solids.

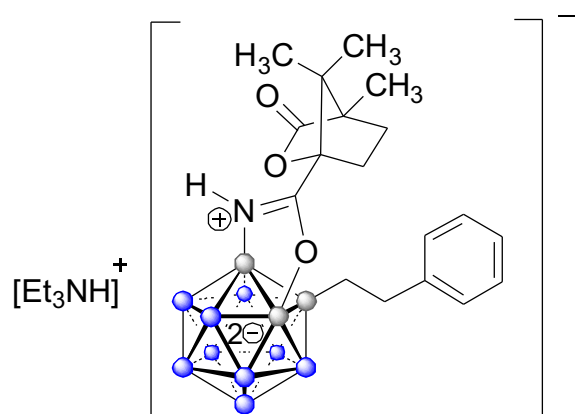

Product **13a**: 85% yield, *dr* = 73:27

$^1\text{H}\{^{11}\text{B}\}$  NMR (400 MHz, acetone- $d_6$ , 23 °C):  $\delta$  10.10 (br, 1H, anionic NH), 7.94 (broad t,  $^1J_{\text{NH}} = 51.4$  Hz, 1H, cationic H), 7.20-7.12 (m, 2H, phenyl H), 7.12-7.05 (m, 2H, phenyl H), 7.05-6.98 (m, 1H, phenyl H), 3.55-4.00 (m, 6H, cationic N- $\text{CH}_2$ ), 2.65-2.46 (overlapping m, 3H, camphanic CH and B- $\text{CH}_2$ - $\text{CH}_2$ ), 2.17-2.07 (m, 1H, camphanic CH), 1.97-1.82 (m, 1H, camphanic CH), 1.73-1.58 (m, 1H, camphanic CH), 1.73-0.70 (broad overlapping m, 9H, BH), 1.42 (t,  $J = 7.3$  Hz, 9H, cationic  $\text{CH}_3$ ), 1.11 (s, 3H, camphanic  $\text{CH}_3$ ), 1.09 (s, 3H, camphanic  $\text{CH}_3$ ), 0.93 (s, 3H, camphanic  $\text{CH}_3$ ), 0.53-0.26 (m, 2H, B- $\text{CH}_2$ - $\text{CH}_2$ ).

$^{13}\text{C}\{^1\text{H}\}$  NMR (100 MHz, acetone- $d_6$ , 23 °C):  $\delta$  180.05 (C=N), 177.29 (C=O), 148.80, 128.69, 128.51, 125.28 (4 phenyl signals), 90.69, 55.83, 55.67 (3 camphanic C), 48.17, (cationic  $\text{CH}_2$ ) 37.51 (B- $\text{CH}_2$ - $\text{CH}_2$ ), 31.59, 29.36, (2 camphanic  $\text{CH}_2$ ), 16.85, 16.65, 9.92 (3 camphanic  $\text{CH}_3$ ), 9.40 (cationic  $\text{CH}_3$ ). The B-C signal was detected indirectly at 18.54 ppm in the HSQC spectrum. Direct detection was not successful because of broadening due to coupling to  $^{10}\text{B}$  and  $^{11}\text{B}$ .

$^{11}\text{B}\{^1\text{H}\}$  NMR (128 MHz, acetone- $d_6$ , 23 °C):  $\delta$  6.56 (1B, B-O), -4.48 (1B, B-N), -10.22 (1B, B-C), -14.26 to -24.22 (9B, BH).

High resolution ESI-MS (negative mode, MeOH): *m/z* calcd for  $[\text{C}_{18}\text{H}_{32}\text{B}_{12}\text{NO}_3]^-$ : 440.3571; Found: 440.3578.

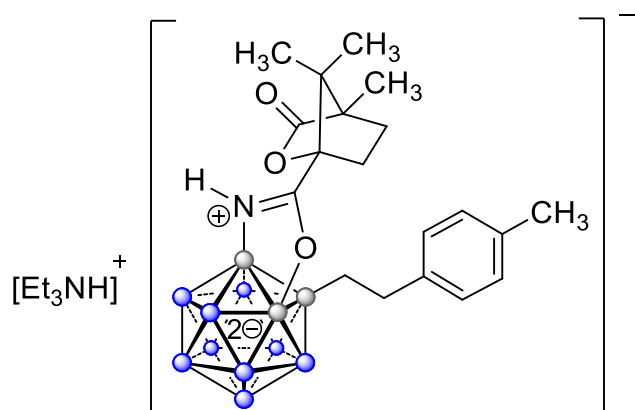

Product **13b**: 68% yield, *dr* = 66:34

$^1\text{H}\{^{11}\text{B}\}$  NMR (400 MHz, acetone- $d_6$ , 23 °C):  $\delta$  10.22 (br, 1H, anionic NH), 8.15-7.66 (broad m, 1H, cationic NH), 7.04-6.90 (overlapping m, 4H, phenyl H), 3.57-3.41 (m, 6H, cationic N- $\text{CH}_2$ ), 2.61 (ddd,  $J$  = 13.6, 10.9, 4.1 Hz, 1H, camphanic CH), 2.56-2.40 (m, 2H, B- $\text{CH}_2$ - $\text{CH}_2$ ), 2.21 (s, 3H, phenyl- $\text{CH}_3$ ), 2.16-2.07 (m, 1H, camphanic CH), 1.96-1.86 (m, 1H, camphanic CH), 1.73-0.70 (broad overlapping m 9H, BH), 1.72-1.67 (m, 1H, camphanic CH), 1.42 (t,  $J$  = 7.3 Hz, 9H, cationic  $\text{CH}_3$ ), 1.12 (s, 3H, camphanic  $\text{CH}_3$ ), 1.10 (s, 3H, camphanic  $\text{CH}_3$ ), 0.93 (s, 3H, camphanic  $\text{CH}_3$ ), 0.54-0.27 (m, 2H, B- $\text{CH}_2$ - $\text{CH}_2$ ).

$^{13}\text{C}\{^1\text{H}\}$  NMR (100 MHz, acetone- $d_6$ , 23 °C):  $\delta$  180.40 (C=N), 177.19 (C=O), 145.44, 134.26, 129.35, 128.42 (4 phenyl signals), 90.65, 55.85, 55.75 (3 camphanic C), 48.19 (cationic  $\text{CH}_2$ ), 36.93 (B- $\text{CH}_2$ - $\text{CH}_2$ ), 31.61, 29.35 (2 camphanic  $\text{CH}_2$ ), 20.95 (phenyl- $\text{CH}_3$ ), 16.85, 16.65, 9.92 (3 camphanic  $\text{CH}_3$ ), 9.41 (cationic  $\text{CH}_3$ ). The B-C signal was detected indirectly at 19.6 ppm in the HSQC spectrum. Direct detection was not successful because of broadening due to coupling to  $^{10}\text{B}$  and  $^{11}\text{B}$ .

$^{11}\text{B}\{^1\text{H}\}$  NMR (128 MHz, acetone- $d_6$ , 23 °C):  $\delta$  6.66 (1B, B-O), -4.08 (1B, B-N), -9.68 (1B, B-C), -15.12 to -24.30 (9B, BH).

High resolution ESI-MS (negative mode, MeOH):  $m/z$  calcd for  $[\text{C}_{19}\text{H}_{34}\text{B}_{12}\text{NO}_3]^-$ : 454.3728; Found: 454.3731.



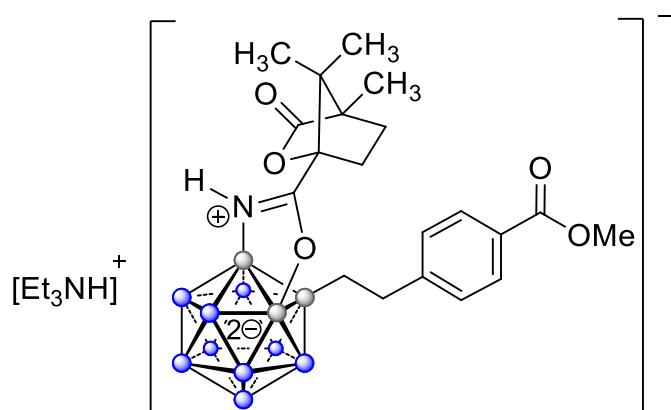

Product **13c**: 82% yield, *dr* = 60:40

$^1\text{H}\{^{11}\text{B}\}$  NMR (400 MHz, acetone- $d_6$ , 23 °C):  $\delta$  10.12 (s, 1H, br, 1H, anionic NH), 7.83 (d,  $J$  = 7.9 Hz, 2H, phenyl CH), 7.22 (d,  $J$  = 7.9 Hz, 2H, phenyl CH), 3.82 (s, 3H,  $-\text{COOCH}_3$ ), 3.49 (q,  $J$  = 7.3 Hz, 6H, cationic N- $\text{CH}_2$ ), 2.72 – 2.50 (overlapping m, 3H, camphanic CH and B- $\text{CH}_2\text{-CH}_2$ ), 2.18 – 2.08 (m, 1H, camphanic CH), 1.99 – 1.86 (m, 1H, camphanic CH), 1.83-1.64 (m, 1H, camphanic CH), 1.83-0.70 (broad overlapping m 9H, BH), 1.42 (t,  $J$  = 7.3 Hz, 9H, cationic  $\text{CH}_3$ ), 1.11 (s, 3H, camphanic  $\text{CH}_3$ ), 1.09 (s, 3H, camphanic  $\text{CH}_3$ ), 0.92 (s, 3H, camphanic  $\text{CH}_3$ ), 0.57 – 0.27 (m, 2H, B- $\text{CH}_2\text{-CH}_2$ ). Only one N-H signal was detected clearly.

$^{13}\text{C}\{^1\text{H}\}$  NMR (100 MHz, acetone- $d_6$ , 23 °C):  $\delta$  180.17 (C=N), 177.25 (C=O), 167.39 (C=O), 154.72, 130.05, 128.68, 127.60 (4 phenyl signals), 90.67, 55.83, 55.70 (3 camphanic C), 51.96 ( $-\text{COOCH}_3$ ), 48.17 (cationic  $\text{CH}_2$ ), 37.59 (B- $\text{CH}_2\text{-CH}_2$ ), 31.61, 29.36, (2 camphanic  $\text{CH}_2$ ), 16.85, 16.65, 9.92 (3 camphanic  $\text{CH}_3$ ), 9.40 (cationic  $\text{CH}_3$ ). The B-C signal was detected indirectly at 19.5 ppm in the HSQC spectrum. Direct detection was not successful because of broadening due to coupling to  $^{10}\text{B}$  and  $^{11}\text{B}$ .

$^{11}\text{B}\{^1\text{H}\}$  NMR (128 MHz, acetone- $d_6$ , 23 °C):  $\delta$  6.53 (1B, B-O), -4.52 (1B, B-N), -10.40 (1B, B-C), -14.74 to -24.95 (9B, BH).

High resolution ESI-MS (negative mode, MeOH): *m/z* calcd for  $[\text{C}_{20}\text{H}_{34}\text{B}_{12}\text{NO}_5]^-$ : 498.3626; Found: 498.3628.

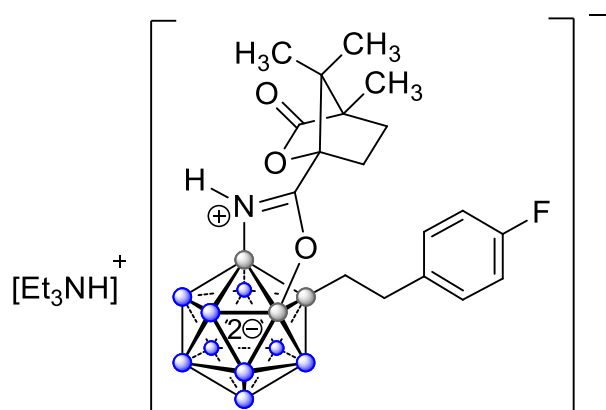

Product **13d**: 75% yield, *dr* = 84:16

$^1\text{H}\{^{11}\text{B}\}$  NMR (400 MHz, acetone- $d_6$ , 23 °C):  $\delta$  10.17 (br, 1H, anionic NH), 7.98 (t,  $^1J_{\text{NH}} = 49.8$  Hz, 1H, cationic NH), 7.20-7.04 (m, 2H, phenyl CH), 6.99-6.85 (m, 2H, phenyl CH), 3.57-3.35 (m, 6H, cationic N- $\text{CH}_2$ ), 2.66-2.56 (m, 1H, camphanic CH), 2.55-2.42 (m, 2H, B- $\text{CH}_2$ - $\text{CH}_2$ ), 2.11 (ddd,  $J = 13.2, 10.8, 4.4$  Hz, 1H, camphanic CH), 1.95-1.85 (m, 1H, camphanic CH), 1.73-1.60 (m, 1H, camphanic CH), 1.73-0.70 (broad overlapping m 9H, BH), 1.41 (t,  $J = 7.3$  Hz, 9H, cationic  $\text{CH}_3$ ), 1.11 (s, 3H, camphanic  $\text{CH}_3$ ), 1.09 (s, 3H, camphanic  $\text{CH}_3$ ), 0.92 (s, 3H, camphanic  $\text{CH}_3$ ) 0.53-0.25 (m, 2H, 2H, B- $\text{CH}_2$ - $\text{CH}_2$ )

$^{13}\text{C}\{^1\text{H}\}$  NMR (100 MHz, acetone- $d_6$ , 23 °C):  $\delta$  180.25 (C=N), 177.22 (C=O), 161.35 (d,  $^1J_{\text{CF}} = 239.5$  Hz), 144.46, 129.89 (d,  $^3J_{\text{CF}} = 7.7$  Hz), 115.13 (d,  $^2J_{\text{CF}} = 20.8$  Hz), (4 phenyl signals), 90.63, 55.81, 55.69 (3 camphanic C), 48.13 (cationic  $\text{CH}_2$ ), 36.47 (B- $\text{CH}_2$ - $\text{CH}_2$ ), 31.57, 29.32, (2 camphanic  $\text{CH}_2$ ) 16.82, 16.62, 9.90 (3 camphanic  $\text{CH}_3$ ), 9.38 (cationic  $\text{CH}_3$ ). The B-C signal was detected indirectly at 19.8 ppm in the HSQC spectrum. Direct detection was not successful because of broadening due to coupling to  $^{10}\text{B}$  and  $^{11}\text{B}$ .

$^{11}\text{B}\{^1\text{H}\}$  NMR (128 MHz, acetone- $d_6$ , 23 °C):  $\delta$  6.64 (1B, B-O), -4.33 (1B, B-N), -10.08 (1B, B-C), -15.05 to -24.40 (9B, BH).

High resolution ESI-MS (negative mode, MeOH): *m/z* calcd for  $[\text{C}_{18}\text{H}_{31}\text{B}_{12}\text{FNO}_3]^-$ : 458.3477; Found: 458.3480.

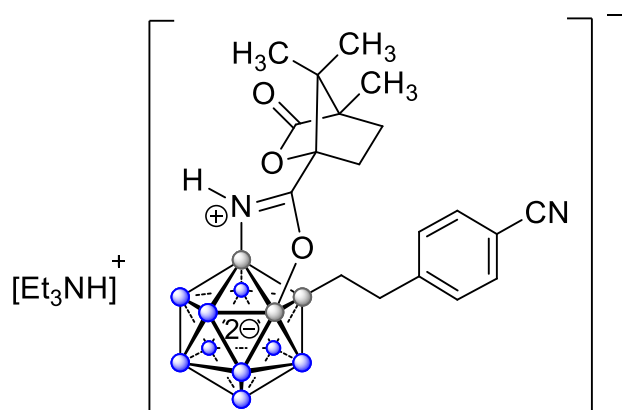

Product **13e**: 65% yield, *dr* = 52:48

$^1\text{H}\{^{11}\text{B}\}$  NMR (400 MHz, acetone- $d_6$ , 23 °C):  $\delta$  10.19 (br, 1H anionic NH), 8.19-7.70 (m, 1H, cationic NH), 7.59 (d,  $J = 7.9$  Hz, 2H, phenyl CH), 7.31 (d,  $J = 7.9$  Hz, 2H, phenyl CH), 3.75-3.24 (m, 6H, cationic N- $\text{CH}_2$ ), 2.69-2.53 (overlapping m, 3H, camphanic CH and B- $\text{CH}_2$ - $\text{CH}_2$ ), 2.16-2.07 (m, 1H, camphanic CH), 1.98-1.85 (m, 1H, camphanic CH), 1.76-1.59 (m, 1H, camphanic CH), 1.76-0.68 (broad overlapping m, 9H, BH) 1.42 (t,  $J = 7.3$  Hz, 9H, cationic  $\text{CH}_3$ ), 1.10 (s, 3H, camphanic  $\text{CH}_3$ ), 1.08 (s, 3H, camphanic  $\text{CH}_3$ ), 0.89 (s, 3H, camphanic  $\text{CH}_3$ ), 0.56-0.28 (m, 2H, B- $\text{CH}_2$ - $\text{CH}_2$ ).

$^{13}\text{C}\{^1\text{H}\}$  NMR (100 MHz, acetone- $d_6$ , 23 °C):  $\delta$  180.42 (C=N), 177.28 (C=O), 154.46, 132.71, 129.61 (3 phenyl signals), 119.76 (CN), 109.00 (phenyl signal), 90.78, 55.83, 55.29 (3 camphanic C), 48.16 (cationic  $\text{CH}_2$ ), 37.44 (B- $\text{CH}_2$ - $\text{CH}_2$ ), 31.57, 28.95, (2 camphanic  $\text{CH}_2$ ) 16.91, 16.73, 9.90 (3 camphanic  $\text{CH}_3$ ), 9.39 (cationic  $\text{CH}_3$ ). The B-C signal was detected indirectly at 19.6 ppm in the HSQC spectrum. Direct detection was not successful because of broadening due to coupling to  $^{10}\text{B}$  and  $^{11}\text{B}$ .

$^{11}\text{B}\{^1\text{H}\}$  NMR (128 MHz, acetone- $d_6$ , 23 °C):  $\delta$  6.61 (1B, B-O), -4.27 (1B, B-N), -10.22 (1B, B-C), -13.58 to -26.34 (9B, BH).

High resolution ESI-MS (negative mode, MeOH):  $m/z$  calcd for  $[\text{C}_{19}\text{H}_{31}\text{B}_{12}\text{N}_2\text{O}_3]^-$ : 465.3524; Found: 465.3531.

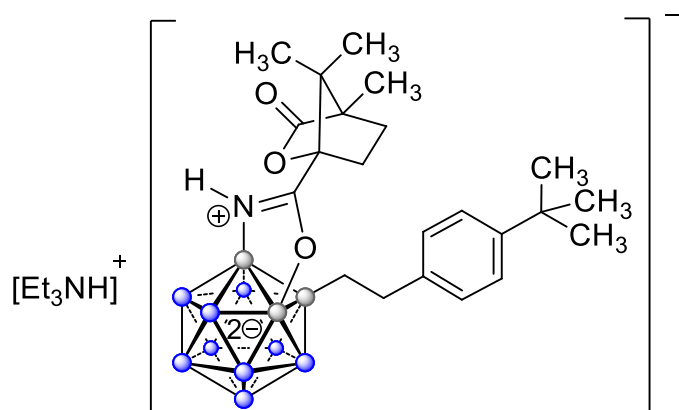

Product **13f**: 66% yield, *dr* = 91:9

$^1\text{H}\{^{11}\text{B}\}$  NMR (400 MHz, acetone- $d_6$ , 23 °C):  $\delta$  10.24 (br, 1H, anionic NH), 8.23-7.97 (broad m, 1H, cationic NH), 7.21 (d,  $J = 8.1$  Hz, 2H, phenyl CH), 7.03 (d,  $J = 8.1$  Hz, 2H, phenyl CH), 3.68-3.35 (m, 6H, cationic N- $\text{CH}_2$ ), 2.68-2.57 (m, 1H, camphanic CH), 2.56-2.41 (m, 2H, B- $\text{CH}_2$ - $\text{CH}_2$ ), 2.12 (ddd,  $J = 12.9, 10.7, 4.2$  Hz, 1H, camphanic CH), 1.97-1.88 (m, 1H, camphanic CH), 1.78-1.60 (m, 1H, camphanic CH), 1.78-0.70 (broad overlapping m 9H, BH), 1.41 (t,  $J = 7.3$  Hz, 9H, cationic  $\text{CH}_3$ ), 1.25 (s, 9H,  $^t\text{Bu}$   $\text{CH}_3$ ), 1.12 (s, 3H, camphanic  $\text{CH}_3$ ), 1.10 (s, 3H, camphanic  $\text{CH}_3$ ), 0.93 (s, 3H, camphanic  $\text{CH}_3$ ), 0.59-0.27 (m, 2H, B- $\text{CH}_2$ - $\text{CH}_2$ ).

$^{13}\text{C}\{^1\text{H}\}$  NMR (100 MHz, acetone- $d_6$ , 23 °C):  $\delta$  180.42 (C=N), 177.19 (C=O), 147.74, 145.27, 128.15, 125.47 (4 phenyl signals), 90.63, 55.83, 55.75 (3 camphanic C), 48.12 (cationic  $\text{CH}_2$ ), 36.73 (B- $\text{CH}_2$ - $\text{CH}_2$ ), 34.64 ( $^t\text{Bu}$  C), 31.72 ( $^t\text{Bu}$   $\text{CH}_3$ ), 31.57, 29.32, (2 camphanic  $\text{CH}_2$ ) 16.83, 16.63, 9.90 (3 camphanic  $\text{CH}_3$ ), 9.39 (cationic  $\text{CH}_3$ ). The B-C signal was detected indirectly at 19.3 ppm in the HSQC spectrum. Direct detection was not successful because of broadening due to coupling to  $^{10}\text{B}$  and  $^{11}\text{B}$ .

$^{11}\text{B}\{^1\text{H}\}$  NMR (128 MHz, acetone- $d_6$ , 23 °C):  $\delta$  6.95 (1B, B-O), -4.01 (1B, B-N), -9.52 (1B, B-C), -13.60 to -25.30 (9B, BH).

High resolution ESI-MS (negative mode, MeOH): *m/z* calcd for  $[\text{C}_{22}\text{H}_{40}\text{B}_{12}\text{NO}_3]^-$ : 496.4197; Found: 496.4202.

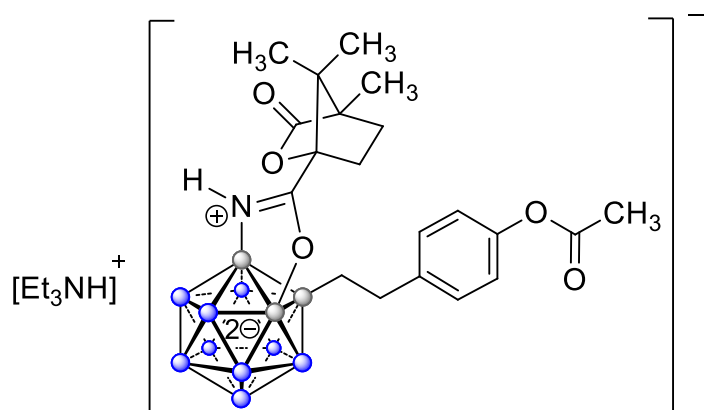

Product **13g**: 78% yield, *dr* = 90:10

$^1\text{H}\{^{11}\text{B}\}$  NMR (400 MHz, acetone- $d_6$ , 23 °C):  $\delta$  10.09 (br, 1H, anionic NH), 7.11 (d,  $J$  = 8.1 Hz, 2H, phenyl CH), 6.90 (d,  $J$  = 8.4 Hz, 2H, phenyl CH), 3.43 (q,  $J$  = 7.3 Hz, 6H, cationic N- $\text{CH}_2$ ), 2.64-2.44 (overlapping m, 3H, camphanic CH and B- $\text{CH}_2$ - $\text{CH}_2$ ), 2.20 (s, 3H, O-CO- $\text{CH}_3$ ), 2.14-2.07 (m, 1H, camphanic CH), 1.90 (ddd,  $J$  = 13.5, 9.3, 4.4 Hz, 1H, camphanic CH), 1.73-1.64 (m, 1H, camphanic CH), 1.73-0.70 (broad overlapping m 9H, BH), 1.41 (t,  $J$  = 7.3 Hz, 9H, cationic  $\text{CH}_3$ ), 1.12 (s, 3H, camphanic  $\text{CH}_3$ ), 1.09 (s, 3H, camphanic  $\text{CH}_3$ ), 0.92 (s, 3H, camphanic  $\text{CH}_3$ ), 0.52-0.25 (m, 2H, B- $\text{CH}_2$ - $\text{CH}_2$ ). Only one N-H signal was detected clearly.

$^{13}\text{C}\{^1\text{H}\}$  NMR (100 MHz, acetone- $d_6$ , 23 °C):  $\delta$  180.04 (C=N), 177.30 (C=O), 169.78 (Ph-O-C=O), 149.14, 146.19, 129.18, 121.87 (4 phenyl signals), 90.70, 55.83, 55.68 (3 camphanic C), 47.91 (cationic  $\text{CH}_2$ ), 36.83 (B- $\text{CH}_2$ - $\text{CH}_2$ ), 31.61, 29.39, (2 camphanic  $\text{CH}_2$ ), 20.96 (CO- $\text{CH}_3$ ), 16.86, 16.67, 9.94 (3 camphanic  $\text{CH}_3$ ), 9.32 (cationic  $\text{CH}_3$ ). The B-C signal was detected indirectly at 19.6 ppm in the HSQC spectrum. Direct detection was not successful because of broadening due to coupling to  $^{10}\text{B}$  and  $^{11}\text{B}$ .

$^{11}\text{B}\{^1\text{H}\}$  NMR (128 MHz, acetone- $d_6$ , 23 °C):  $\delta$  6.79 (1B, B-O), -4.51 (1B, B-N), -10.30 (1B, B-C), -14.22 to -24.84 (9B, BH).

High resolution ESI-MS (negative mode, MeOH): *m/z* calcd for  $[\text{C}_{20}\text{H}_{34}\text{B}_{12}\text{NO}_5]^-$ : 498.3626; Found: 498.3632.

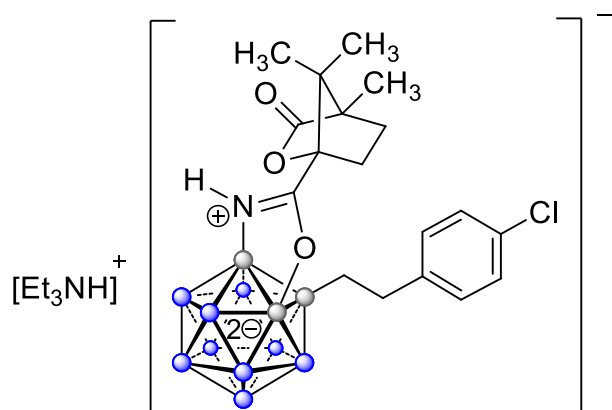

Product **13h**: 73% yield, *dr* = 72:28

$^1\text{H}\{^{11}\text{B}\}$  NMR (400 MHz, acetone- $d_6$ , 23 °C):  $\delta$  10.14 (br, 1H, anionic NH), 7.99 (br, 1H, cationic NH), 7.18 (d,  $J$  = 8.3 Hz, 2H, phenyl CH), 7.10 (d,  $J$  = 8.3 Hz, 2H, phenyl CH), 3.46 (q,  $J$  = 7.3 Hz, 6H, cationic N- $\text{CH}_2$ ), 2.60 (ddd,  $J$  = 13.5, 10.8, 4.3 Hz, 1H, camphanic CH), 2.55-2.42 (m, 2H, B- $\text{CH}_2$ - $\text{CH}_2$ ), 2.18-2.08 (m, 1H, camphanic CH), 1.99-1.86 (m, 1H, camphanic CH), 1.75-1.59 (m, 1H, camphanic CH), 1.75-0.70 (broad overlapping m 9H, BH), 1.41 (t,  $J$  = 7.3 Hz, 9H, cationic  $\text{CH}_3$ ), 1.11 (s, 3H, camphanic  $\text{CH}_3$ ), 1.09 (s, 3H, camphanic  $\text{CH}_3$ ), 0.92 (s, 3H, camphanic  $\text{CH}_3$ ), 0.53-0.26 (m, 2H, B- $\text{CH}_2$ - $\text{CH}_2$ ).

$^{13}\text{C}\{^1\text{H}\}$  NMR (100 MHz, acetone- $d_6$ , 23 °C):  $\delta$  180.19 (C=N), 177.22 (C=O), 147.47, 130.42, 130.16, 128.64 (4 phenyl signals), 90.61, 55.79, 55.67 (3 camphanic C), 48.11 (cationic  $\text{CH}_2$ ), 36.66 (B- $\text{CH}_2$ - $\text{CH}_2$ ), 31.56, 29.31, (2 camphanic  $\text{CH}_2$ ), 16.82, 16.61, 9.89 (3 camphanic  $\text{CH}_3$ ), 9.37 (cationic  $\text{CH}_3$ ). The B-C signal was detected indirectly at 19.4 ppm in the HSQC spectrum. Direct detection was not successful because of broadening due to coupling to  $^{10}\text{B}$  and  $^{11}\text{B}$ .

$^{11}\text{B}\{^1\text{H}\}$  NMR (128 MHz, acetone- $d_6$ , 23 °C):  $\delta$  6.34 (1B, B-O), -4.49 (1B, B-N), -10.28 (1B, B-C), -14.44 to -24.54 (9B, BH).

High resolution ESI-MS (negative mode, MeOH): *m/z* calcd for  $[\text{C}_{18}\text{H}_{31}\text{B}_{12}\text{ClINO}_3]^-$ : 474.3182; Found: 474.3189.

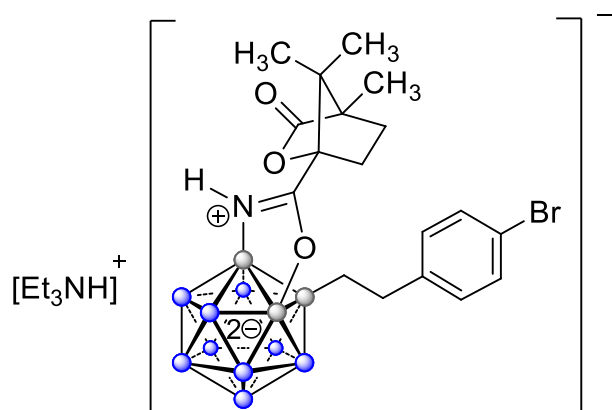

Product **13i**: 70% yield, *dr* = 74:26

$^1\text{H}\{^{11}\text{B}\}$  NMR (400 MHz, acetone- $d_6$ , 23 °C):  $\delta$  10.19 (br, 1H, anionic NH), 8.00 (t,  $J$  = 49.5 Hz, 1H, cationic NH), 7.33 (d,  $J$  = 8.2 Hz, 2H, phenyl CH), 7.06 (d,  $J$  = 8.2 Hz, 2H, phenyl CH), 3.68-3.22 (m, 6H, cationic N- $\text{CH}_2$ ), 2.60 (ddd,  $J$  = 13.9, 11.0, 4.2 Hz, 1H, camphanic CH), 2.56-2.41 (m, 2H, B- $\text{CH}_2$ - $\text{CH}_2$ ), 2.16-2.07 (m, 1H, camphanic CH), 1.97-1.76 (m, 1H, camphanic CH), 1.77-1.60 (m, 1H, camphanic CH), 1.77-0.70 (broad overlapping m 9H, BH), 1.41 (t,  $J$  = 7.3 Hz, 9H, cationic  $\text{CH}_3$ ), 1.12 (s, 3H, camphanic  $\text{CH}_3$ ), 1.09 (s, 3H, camphanic  $\text{CH}_3$ ), 0.92 (s, 3H, camphanic  $\text{CH}_3$ ), 0.51-0.26 (m, 2H, B- $\text{CH}_2$ - $\text{CH}_2$ )

$^{13}\text{C}\{^1\text{H}\}$  NMR (100 MHz, acetone- $d_6$ , 23 °C):  $\delta$  180.39 (C=N), 177.22 (C=O), 147.91, 131.61, 130.68, 118.51 (4 phenyl signals), 90.64, 55.85, 55.75 (3 camphanic C), 48.15 (cationic  $\text{CH}_2$ ), 36.73 (B- $\text{CH}_2$ - $\text{CH}_2$ ), 31.61, 29.35, (2 camphanic  $\text{CH}_2$ ), 16.85, 16.65, 9.92 (3 camphanic  $\text{CH}_3$ ), 9.41 (cationic  $\text{CH}_3$ ). The B-C signal was detected indirectly at 19.3 ppm in the HSQC spectrum. Direct detection was not successful because of broadening due to coupling to  $^{10}\text{B}$  and  $^{11}\text{B}$ .

$^{11}\text{B}\{^1\text{H}\}$  NMR (128 MHz, acetone- $d_6$ , 23 °C):  $\delta$  6.80 (1B, B-O), -4.23 (1B, B-N), -10.04 (1B, B-C), -14.30 to -24.90 (9B, BH).

High resolution ESI-MS (negative mode, MeOH): *m/z* calcd for  $[\text{C}_{18}\text{H}_{31}\text{B}_{12}\text{BrNO}_3]^-$ : 519.2698; Found: 519.2695.

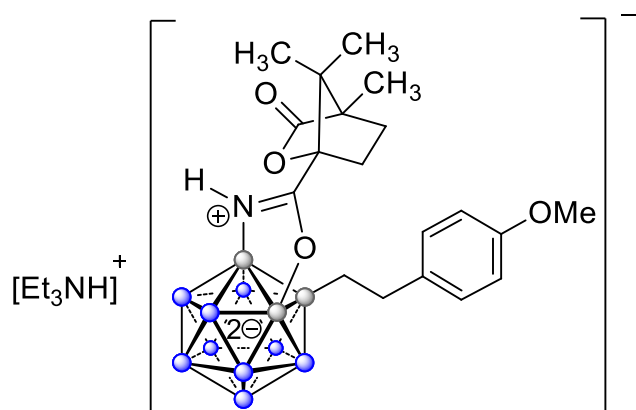

Product **13j**: 63% yield, *dr* = 66:34

$^1\text{H}\{^{11}\text{B}\}$  NMR (400 MHz, acetone- $d_6$ , 23 °C):  $\delta$  10.08 (br, 1H anionic NH), 8.21-7.61 (br, 1H, cationic NH), 7.00 (d,  $J$  = 8.3 Hz, 2H, phenyl CH), 6.73 (d,  $J$  = 8.3 Hz, 2H, phenyl CH), 3.70 (s, 3H, O-CH<sub>3</sub>), 3.48 (q,  $J$  = 7.1 Hz, 6H cationic N-CH<sub>2</sub>), 2.60 (ddd,  $J$  = 14.1, 11.1, 4.0 Hz, 1H, camphanic CH), 2.55-2.38 (m, 2H, B-CH<sub>2</sub>-CH<sub>2</sub>), 2.10 (ddd,  $J$  = 13.4, 10.9, 4.6 Hz, 1H, camphanic CH), 1.97-1.86 (m, 1H, camphanic CH), 1.73-1.55 (m, 1H, camphanic CH), 1.73-0.70 (broad overlapping m, 9H, BH), 1.42 (t,  $J$  = 7.3 Hz, 9H, cationic CH<sub>3</sub>), 1.11 (s, 3H, camphanic CH<sub>3</sub>), 1.09 (s, 3H, camphanic CH<sub>3</sub>), 0.92 (s, 3H, camphanic CH<sub>3</sub>), 0.53-0.26 (m, 2H, B-CH<sub>2</sub>-CH<sub>2</sub>).

$^{13}\text{C}\{^1\text{H}\}$  NMR (100 MHz, acetone- $d_6$ , 23 °C):  $\delta$  180.05 (C=N), 177.29 (C=O), 157.97, 140.70, 129.25, 114.12 (4 phenyl signals), 90.69, 55.84, 55.67 (3 camphanic C), 55.28 (O-CH<sub>3</sub>), 48.18 (cationic CH<sub>2</sub>), 36.48 (B-CH<sub>2</sub>-CH<sub>2</sub>), 31.61, 29.37, (2 camphanic CH<sub>2</sub>), 16.85, 16.66, 9.93 (3 camphanic CH<sub>3</sub>), 9.40 (cationic CH<sub>3</sub>). The B-C signal was detected indirectly at 19.6 ppm in the HSQC spectrum. Direct detection was not successful because of broadening due to coupling to  $^{10}\text{B}$  and  $^{11}\text{B}$ .

$^{11}\text{B}\{^1\text{H}\}$  NMR (128 MHz, acetone- $d_6$ , 23 °C):  $\delta$  6.32 (1B, B-O), -4.56 (1B, B-N), -10.21 (1B, B-C), -15.2 to -23.9 (9B, BH).

High resolution ESI-MS (negative mode, MeOH): *m/z* calcd for [C<sub>19</sub>H<sub>34</sub>B<sub>12</sub>NO<sub>4</sub>]<sup>-</sup>: 470.3677; Found: 470.3683.



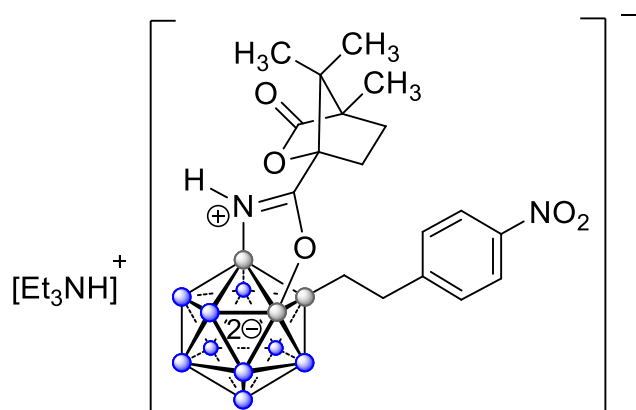

Product **13k**: 72% yield, *dr* = 55:45

$^1\text{H}\{^{11}\text{B}\}$  NMR (400 MHz, acetone- $d_6$ , 23 °C):  $\delta$  10.11 (br, 1H anionic NH), 8.08 (d,  $J$  = 8.3 Hz, 2H, phenyl CH), 7.37 (d,  $J$  = 8.3 Hz, 2H, phenyl CH), 3.50 (q,  $J$  = 7.3 Hz, 6H cationic N- $\text{CH}_2$ ), 2.79-2.55 (overlapping m, 3H, camphanic CH and B- $\text{CH}_2$ - $\text{CH}_2$ ), 2.10 (ddd,  $J$  = 13.8, 10.0, 3.9 Hz, 1H, camphanic CH), 1.99-1.86 (m, 1H, camphanic CH), 1.77-1.58 (m, 1H, camphanic CH), 1.77-0.70 (broad overlapping m, 9H, BH), 1.43 (t,  $J$  = 7.3 Hz, 9H, cationic  $\text{CH}_3$ ), 1.12 (s, 3H, camphanic  $\text{CH}_3$ ), 1.09 (s, 3H, camphanic  $\text{CH}_3$ ), 0.93 (s, 3H, camphanic  $\text{CH}_3$ ), 0.55-0.31 (m, 2H, B- $\text{CH}_2$ - $\text{CH}_2$ ). Only one N-H signal was detected clearly.

$^{13}\text{C}\{^1\text{H}\}$  NMR (100 MHz, acetone- $d_6$ , 23 °C):  $\delta$  180.21 (C=N), 177.24 (C=O), 157.29, 146.45, 129.55, 124.02 (4 phenyl signals), 90.65, 56.03, 55.72 (3 camphanic C), 48.21 (cationic  $\text{CH}_2$ ), 37.47 (B- $\text{CH}_2$ - $\text{CH}_2$ ), 31.60, 29.37, (2 camphanic  $\text{CH}_2$ ), 16.96, 16.66, 9.92 (3 camphanic  $\text{CH}_3$ ), 9.41 (cationic  $\text{CH}_3$ ). The B-C signal was detected indirectly at 19.4 ppm in the HSQC spectrum. Direct detection was not successful because of broadening due to coupling to  $^{10}\text{B}$  and  $^{11}\text{B}$ .

$^{11}\text{B}\{^1\text{H}\}$  NMR (128 MHz, acetone- $d_6$ , 23 °C):  $\delta$  6.41 (1B, B-O), -4.59 (1B, B-N), -10.62 (1B, B-C), -14.8 to -23.9 (9B, BH).

High resolution ESI-MS (negative mode, MeOH):  $m/z$  calcd for  $[\text{C}_{18}\text{H}_{31}\text{B}_{12}\text{N}_2\text{O}_5]^-$ : 485.3422; Found: 485.3431.

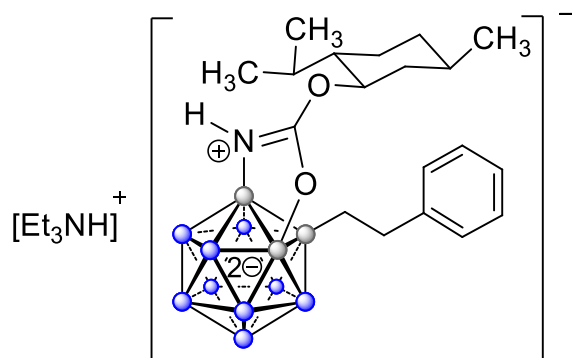

Product **14a**: 87% yield, *dr* = 75:25

$^1\text{H}\{^{11}\text{B}\}$  NMR (400 MHz, acetone- $d_6$ , 23 °C):  $\delta$  8.14 (br, 1H, anionic NH), 8.06-7.48 (br, 1H cationic NH), 7.21-7.08 (m, 4H, phenyl H), 7.03 (m, 1H, phenyl H), 4.81-4.64 (m, 1H, menthyl CH), 3.50 (q,  $J = 7.3$  Hz, 6H, cationic N- $\text{CH}_2$ ), 2.63-2.51 (m, 2H, B- $\text{CH}_2$ - $\text{CH}_2$ ), 2.16-2.08 (overlapping with solvent residual signal m, 1H, menthyl CH), 1.93-1.86 (m, 1H, menthyl CH), 1.78-0.37 (broad overlapping m, 16H, 7 menthyl CH and 9 BH), 1.43 (t,  $J = 7.3$  Hz, 9H, cationic  $\text{CH}_3$ ), 0.92 (d,  $J = 9.0$  Hz, 3H, menthyl  $\text{CH}_3$ ), 0.88 (d,  $J = 6.7$  Hz, 3H, menthyl  $\text{CH}_3$ ), 0.79 (d,  $J = 7.1$  Hz, 3H, menthyl  $\text{CH}_3$ ), 0.75-0.38 (m, 2H, B- $\text{CH}_2$ - $\text{CH}_2$ ).

$^{13}\text{C}\{^1\text{H}\}$  NMR (100 MHz, acetone- $d_6$ , 23 °C):  $\delta$  169.57 (C=N), 148.70, 128.61, 128.55, 125.21 (4 phenyl signals), 82.38 (menthyl CH), 48.21 (cationic  $\text{CH}_2$ ), 48.03 (menthyl CH), 41.71 (menthyl  $\text{CH}_2$ ), 37.65 (B- $\text{CH}_2$ - $\text{CH}_2$ ), 34.62 (menthyl  $\text{CH}_2$ ), 31.80, 27.24 (2 menthyl CH), 24.16 (menthyl  $\text{CH}_2$ ), 22.15, 20.72, 16.86 (3 menthyl  $\text{CH}_3$ ), 9.40 (cationic  $\text{CH}_3$ ). The B-C signal was detected indirectly at 19.8 ppm in the HSQC spectrum. Direct detection was not successful because of broadening due to coupling to  $^{10}\text{B}$  and  $^{11}\text{B}$ .

$^{11}\text{B}\{^1\text{H}\}$  NMR (128 MHz, acetone- $d_6$ , 23 °C):  $\delta$  6.90 (1B, B-O), -2.78 (1B, B-N), -6.58 (1B, B-C), -13.2 to -29.9 (9B, BH).

High resolution ESI-MS (negative mode, MeOH): *m/z* calcd for  $[\text{C}_{19}\text{H}_{38}\text{B}_{12}\text{NO}_2]^-$ : 442.4092; Found: 442.4101.

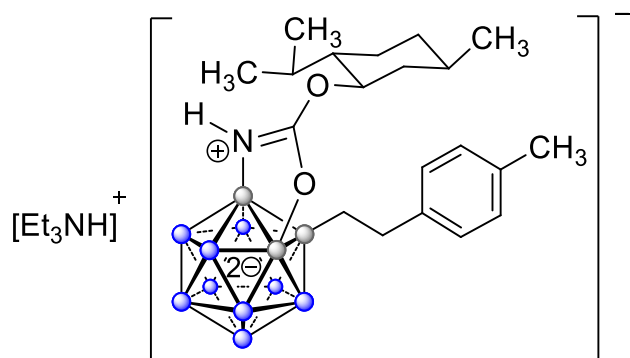

Product **14b**: 72% yield, *dr* = 73:27

$^1\text{H}\{^{11}\text{B}\}$  NMR (400 MHz, acetone- $d_6$ , 23 °C):  $\delta$  8.15 (br, 1H, anionic NH), 8.09-7.70 (br, 1H, cationic NH), 7.06-6.89 (overlapping m, 4H, phenyl H), 4.78-4.66 (m, 1H, menthyl CH), 3.50 (q,  $J = 7.4$  Hz, 6H cationic N- $\text{CH}_2$ ), 2.59-2.46 (m, 2H, B- $\text{CH}_2$ - $\text{CH}_2$ ), 2.22 (s, 3H phenyl- $\text{CH}_3$ ), 2.14-2.08 (overlapping with solvent residual signal m, 1H, menthyl CH), 2.03-1.88 (m, 1H, menthyl CH), 1.74-0.39 (broad overlapping m, 16H, 7 menthyl CH and 9 BH), 1.43 (t,  $J = 7.3$  Hz, 9H, cationic  $\text{CH}_3$ ), 0.92-0.82 (overlapping m, 6H, 2 menthyl  $\text{CH}_3$ ), 0.79 (d,  $J = 6.9$  Hz, 3H, menthyl  $\text{CH}_3$ ), 0.58-0.51 (m, 2H, B- $\text{CH}_2$ - $\text{CH}_2$ ).

$^{13}\text{C}\{^1\text{H}\}$  NMR (100 MHz, acetone- $d_6$ , 23 °C):  $\delta$  169.75 (C=N), 145.47, 134.26, 129.28, 128.45 (4 phenyl signals), 82.93 (menthyl CH), 48.13 (cationic  $\text{CH}_2$ ), 47.97 (menthyl CH), 41.62 (menthyl  $\text{CH}_2$ ), 36.94 (B- $\text{CH}_2$ - $\text{CH}_2$ ), 34.52 (menthyl  $\text{CH}_2$ ), 31.77, 27.22 (2 menthyl CH), 24.10 (menthyl  $\text{CH}_2$ ), 22.10 (1 menthyl  $\text{CH}_3$ ), 20.95 (phenyl- $\text{CH}_3$ ), 20.68, 16.81 (2 menthyl  $\text{CH}_3$ ), 9.39 (cationic  $\text{CH}_3$ ). The B-C signal was detected indirectly at 19.3 ppm in the HSQC spectrum. Direct detection was not successful because of broadening due to coupling to  $^{10}\text{B}$  and  $^{11}\text{B}$ .

$^{11}\text{B}\{^1\text{H}\}$  NMR (128 MHz, acetone- $d_6$ , 23 °C):  $\delta$  5.82 (1B, B-O), -3.92 (1B, B-N), -7.77 (1B, B-C), -12.96 to -26.14 (9B, BH).

High resolution ESI-MS (negative mode, MeOH): *m/z* calcd for  $[\text{C}_{20}\text{H}_{40}\text{B}_{12}\text{NO}_2]^-$ : 456.4248; Found: 456.4256.

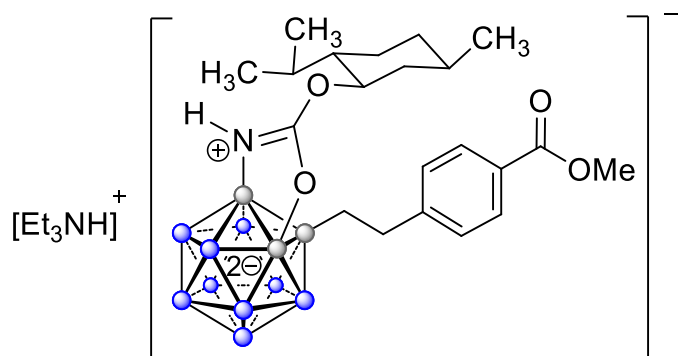

Product **14c**: 84% yield, *dr* = 71:21

$^1\text{H}\{^{11}\text{B}\}$  NMR (400 MHz, acetone- $d_6$ , 23 °C):  $\delta$  8.17 (br, 1H, anionic NH), 7.85 (d,  $J = 7.7$  Hz, 2H, phenyl H), 7.24 (d,  $J = 7.7$  Hz, 2H, phenyl H), 4.80-4.62 (m, 1H menthyl CH), 3.83 (s, 3H,  $-\text{COOCH}_3$ ), 3.48 (q,  $J = 7.4$  Hz, 6H, cationic N- $\text{CH}_2$ ), 2.67-2.56 (m, 2H, B- $\text{CH}_2$ - $\text{CH}_2$ ), 2.16-2.07 (overlapping with solvent residual signal m, 1H, menthyl CH), 1.96-1.86 (m, 1H, menthyl CH), 1.77-0.41 (broad overlapping m, 16H, 7CH and 9BH), 1.42 (t,  $J = 7.2$  Hz, 9H, cationic  $\text{CH}_3$ ), 0.91 (d,  $J = 8.2$  Hz, 3H, menthyl  $\text{CH}_3$ ), 0.87 (d,  $J = 8.3$  Hz, 3H, menthyl  $\text{CH}_3$ ), 0.78 (d,  $J = 6.7$  Hz, 3H, menthyl  $\text{CH}_3$ ), 0.65-0.50 (m, 2H, B- $\text{CH}_2$ - $\text{CH}_2$ ). Only one N-H signal was detected clearly.

$^{13}\text{C}\{^1\text{H}\}$  NMR (100 MHz, acetone- $d_6$ , 23 °C):  $\delta$  169.59 (C=N), 167.43 (C=O), 155.05, 129.98, 128.75, 127.57 (4 phenyl signals), 82.45 (menthyl CH), 51.97 ( $\text{COOCH}_3$ ), 48.11 (cationic  $\text{CH}_2$ ), 47.99 (menthyl CH), 41.67 (menthyl  $\text{CH}_2$ ), 37.74 (B- $\text{CH}_2$ - $\text{CH}_2$ ), 34.57 (menthyl  $\text{CH}_2$ ), 31.63, 27.23 (2 menthyl CH), 24.15 (menthyl  $\text{CH}_2$ ), 22.14, 20.73, 16.85 (3 menthyl  $\text{CH}_3$ ), 9.38 (cationic  $\text{CH}_3$ ). The B-C signal was detected indirectly at 19.4 ppm in the HSQC spectrum. Direct detection was not successful because of broadening due to coupling to  $^{10}\text{B}$  and  $^{11}\text{B}$ .

$^{11}\text{B}\{^1\text{H}\}$  NMR (128 MHz, acetone- $d_6$ , 23 °C):  $\delta$  5.46 (1B, B-O), -4.68 (1B, B-N), -8.90 (1B, B-C), -12.90 to -22.20 (9B, BH).

High resolution ESI-MS (negative mode, MeOH): *m/z* calcd for  $[\text{C}_{21}\text{H}_{40}\text{B}_{12}\text{NO}_4]^-$ : 500.4146; Found: 500.4149.

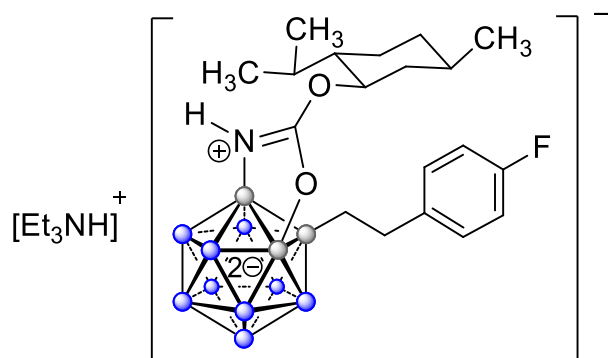

Product **14d**: 79% yield, *dr* = 79:21

$^1\text{H}\{^{11}\text{B}\}$  NMR (400 MHz, acetone- $d_6$ , 23 °C):  $\delta$  8.15 (br, 1H, anionic NH), 8.08-7.56 (br, 1H, cationic NH), 7.21-7.05 (m, 2H, phenyl H), 6.98-6.86 (m, 2H, phenyl H), 4.78-4.64 (m, 1H, menthyl CH), 3.56-3.45 (m, 6H, cationic N- $\text{CH}_2$ ), 2.64-2.45 (m, 2H, B- $\text{CH}_2$ - $\text{CH}_2$ ), 2.13-2.06 (overlapping with solvent residual signal m, 1H, menthyl CH), 1.95-1.85(m, 1H, menthyl CH), 1.75-0.28 (broad overlapping m, 16H, 7 menthyl CH and 9 BH), 1.43 (t,  $J = 7.3$  Hz, 9H, cationic  $\text{CH}_3$ ), 0.93-0.85 (overlapping m, 6H, 2 menthyl  $\text{CH}_3$ ), 0.78 (d,  $J = 7.0$  Hz, 3H, menthyl  $\text{CH}_3$ ), 0.58-0.49 (m, 2H, B- $\text{CH}_2$ - $\text{CH}_2$ ).

$^{13}\text{C}\{^1\text{H}\}$  NMR (100 MHz, acetone- $d_6$ , 23 °C):  $\delta$  169.81 (C=N), 161.44 (d,  $^1J_{\text{CF}} = 239.8$  Hz), 144.35, 129.96 (d,  $^3J_{\text{CF}} = 7.5$  Hz), 115.11 (d,  $^2J_{\text{CF}} = 20.9$  Hz), (4 phenyl signals), 83.09 (menthyl CH), 49.17 (cationic  $\text{CH}_2$ ), 47.94 (menthyl CH), 41.75 (menthyl  $\text{CH}_2$ ), 36.43 (B- $\text{CH}_2$ - $\text{CH}_2$ ), 34.48 (menthyl  $\text{CH}_2$ ), 31.76, 27.23 (2 menthyl CH), 24.10 (menthyl  $\text{CH}_2$ ), 22.08, 20.66, 16.80 (3 menthyl  $\text{CH}_3$ ), 9.40 (cationic  $\text{CH}_3$ ). The B-C signal was detected indirectly at 19.8 ppm in the HSQC spectrum. Direct detection was not successful because of broadening due to coupling to  $^{10}\text{B}$  and  $^{11}\text{B}$ .

$^{11}\text{B}\{^1\text{H}\}$  NMR (128 MHz, acetone- $d_6$ , 23 °C):  $\delta$  5.93 (1B, B-O), -3.74 (1B, B-N), -7.72 (1B, B-C), -13.47 to -25.90 (9B, BH).

High resolution ESI-MS (negative mode, MeOH): *m/z* calcd for  $[\text{C}_{19}\text{H}_{37}\text{B}_{12}\text{FNO}_2]^-$ : 460.3998; Found: 460.4005.

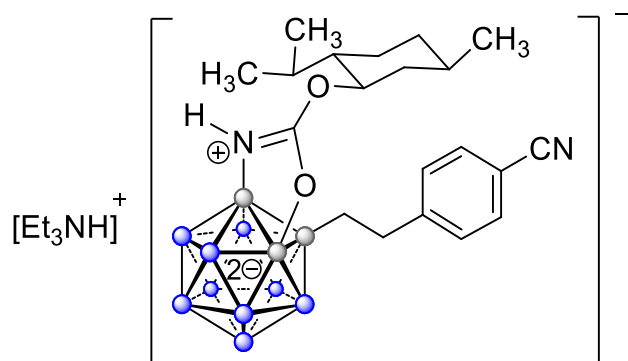

Product **14e**: 68% yield, *dr* = 72:28

$^1\text{H}\{^{11}\text{B}\}$  NMR (400 MHz, acetone- $d_6$ , 23 °C):  $\delta$  8.20 (br, 1H, anionic NH), 8.14-7.65 (br, 1H, cationic NH), 7.65-7.51 (m, 2H, phenyl H), 7.40-7.20 (m, 2H, phenyl H), 4.78-4.63 (m, 1H, menthyl CH), 3.49 (q,  $J = 7.3$  Hz, 6H, cationic N- $\text{CH}_2$ ), 2.75-2.52 (m, 2H, B- $\text{CH}_2$ - $\text{CH}_2$ ), 2.03-1.92 (overlapping with solvent residual signal m, 1H, menthyl CH), 1.92-1.74 (m, 1H, menthyl CH), 1.74-0.39 (broad overlapping m, 16H, 7 menthyl CH and 9 BH), 1.42 (t,  $J = 7.3$  Hz, 9H, cationic  $\text{CH}_3$ ), 0.93-0.83 (overlapping m, 6H, 2 menthyl  $\text{CH}_3$ ), 0.77 (d,  $J = 6.8$  Hz, 3H, menthyl  $\text{CH}_3$ ), 0.62-0.49 (m, 2H, B- $\text{CH}_2$ - $\text{CH}_2$ ). Only one N-H signal was detected clearly.

$^{13}\text{C}\{^1\text{H}\}$  NMR (100 MHz, acetone- $d_6$ , 23 °C):  $\delta$  169.59 (C=N), 155.06, 132.58, 129.64 (3 phenyl signals), 119.85 (CN), 109.05 (phenyl signal), 82.50 (menthyl CH), 48.18 (cationic  $\text{CH}_2$ ), 47.94 (menthyl CH), 41.62 (menthyl  $\text{CH}_2$ ), 37.79 (B- $\text{CH}_2$ - $\text{CH}_2$ ), 34.51 (menthyl  $\text{CH}_2$ ), 31.76, 27.20 (2 menthyl CH), 24.11 (menthyl  $\text{CH}_2$ ), 22.10, 20.67, 16.82 (3 menthyl  $\text{CH}_3$ ), 9.39 (cationic  $\text{CH}_3$ ). The B-C signal was detected indirectly at 19.7 ppm in the HSQC spectrum. Direct detection was not successful because of broadening due to coupling to  $^{10}\text{B}$  and  $^{11}\text{B}$ .

$^{11}\text{B}\{^1\text{H}\}$  NMR (128 MHz, acetone- $d_6$ , 23 °C):  $\delta$  5.32 (1B, B-O), -4.64 (1B, B-N), -8.94 (1B, B-C), -14.00 to -23.30 (9B, BH).

High resolution ESI-MS (negative mode, MeOH): *m/z* calcd for  $[\text{C}_{20}\text{H}_{37}\text{B}_{12}\text{N}_2\text{O}_2]^-$ : 467.4044; Found: 467.4053.



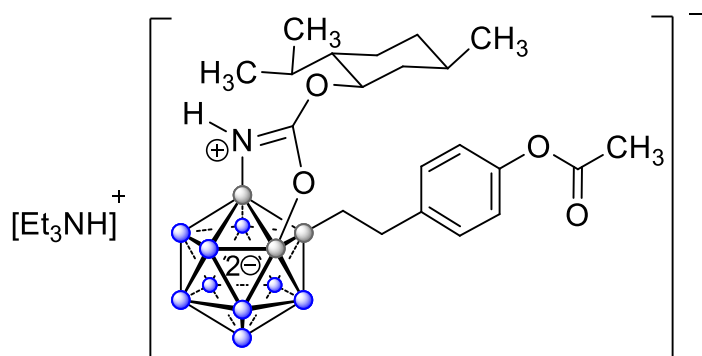

Product **14g**: 78% yield, *dr* = 85:15

$^1\text{H}\{^{11}\text{B}\}$  NMR (400 MHz, acetone- $d_6$ , 23 °C):  $\delta$  8.23 (br, 1H anionic NH), 8.09-7.60 (br, 1H, cationic NH), 7.13 (d,  $J$  = 8.2 Hz, 2H, phenyl H), 6.91 (d,  $J$  = 8.2 Hz, 2H, phenyl H), 4.82-4.66 (m, 1H, menthyl CH), 3.63-3.28 (m, 6H, cationic N- $\text{CH}_2$ ), 2.67-2.48 (m, 2H, B- $\text{CH}_2$ - $\text{CH}_2$ ), 2.20 (s, 3H, - $\text{OCOCH}_3$ ), 2.16-2.08 (overlapping with solvent residual signal m, 1H, menthyl CH), 1.99-1.86 (m, 1H, menthyl CH), 1.73-0.29 (broad overlapping m, 16H, 7CH and 9BH), 1.41 (t,  $J$  = 7.3 Hz, 9H, cationic  $\text{CH}_3$ ), 0.90 (d,  $J$  = 5.2 Hz, 3H, menthyl  $\text{CH}_3$ ), 0.88 (d,  $J$  = 4.3 Hz, 3H, menthyl  $\text{CH}_3$ ), 0.79 (d,  $J$  = 7.0 Hz, 3H, menthyl  $\text{CH}_3$ ), 0.60-0.50 (m, 2H, B- $\text{CH}_2$ - $\text{CH}_2$ ).

$^{13}\text{C}\{^1\text{H}\}$  NMR (100 MHz, acetone- $d_6$ , 23 °C):  $\delta$  169.75, 169.61 (C=O and C=N), 149.12, 146.08, 129.13, 121.79 (4 phenyl signals), 82.65 (menthyl CH), 48.18 (cationic  $\text{CH}_2$ ), 47.92 (menthyl CH), 41.59 (menthyl  $\text{CH}_2$ ), 36.79 (B- $\text{CH}_2$ - $\text{CH}_2$ ), 34.50 (menthyl  $\text{CH}_2$ ), 31.76, 27.19 (2 menthyl CH), 24.11 (menthyl  $\text{CH}_2$ ), 22.11 (menthyl  $\text{CH}_3$ ), 20.94 ( $\text{OCOCH}_3$ ), 20.65, 16.81 (2 menthyl  $\text{CH}_3$ ), 9.39 (cationic  $\text{CH}_3$ ). The B-C signal was detected indirectly at 19.9 ppm in the HSQC spectrum. Direct detection was not successful because of broadening due to coupling to  $^{10}\text{B}$  and  $^{11}\text{B}$ .

$^{11}\text{B}\{^1\text{H}\}$  NMR (128 MHz, acetone- $d_6$ , 23 °C):  $\delta$  5.84 (1B, B-O), -4.26 (1B, B-N), -8.36 (1B, B-C), -13.05 to -24.94 (9B, BH).

High resolution ESI-MS (negative mode, MeOH):  $m/z$  calcd for  $[\text{C}_{21}\text{H}_{40}\text{B}_{12}\text{NO}_4]^-$ : 500.4147; Found: 500.4149.



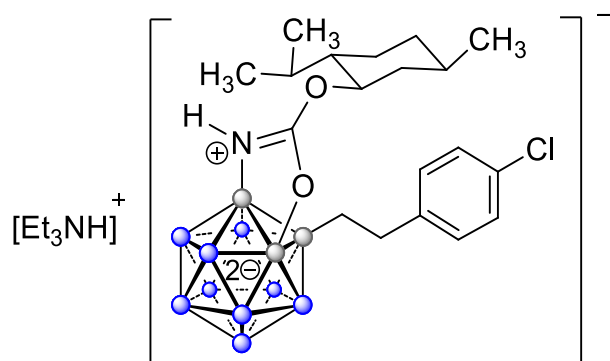

Product **14h**: 75% yield, *dr* = 68:32

$^1\text{H}\{^{11}\text{B}\}$  NMR (400 MHz, acetone- $d_6$ , 23 °C):  $\delta$  8.20 (br, 1H, anionic NH), 8.11-7.59 (br, 1H, cationic NH), 7.21-7.17 (m, 2H, phenyl H), 7.17-7.08 (m, 2H, phenyl H), 4.78-4.65 (m, 1H, menthyl CH), 3.53-3.37 (m, 6H, cationic N- $\text{CH}_2$ ), 2.63-2.45 (m, 2H, B- $\text{CH}_2$ - $\text{CH}_2$ ), 2.11-2.06 (overlapping with solvent residual signal m, 1H, menthyl CH), 1.96-1.82 (m, 1H, menthyl CH), 1.78-0.35 (broad overlapping m, 16H, 7 menthyl CH and 9 BH), 1.42 (t,  $J = 7.3$  Hz, 9H, cationic  $\text{CH}_3$ ), 0.93-0.86 (overlapping m, 6H, 2 menthyl  $\text{CH}_3$ ), 0.80 (d,  $J = 7.0$  Hz, 3H, menthyl  $\text{CH}_3$ ), 0.58-0.49 (m, 2H, B- $\text{CH}_2$ - $\text{CH}_2$ ).

$^{13}\text{C}\{^1\text{H}\}$  NMR (100 MHz, acetone- $d_6$ , 23 °C):  $\delta$  169.59 (C=N), 147.79, 130.41, 130.22 128.58 (4 phenyl signals), 82.53 (menthyl CH), 48.18 (cationic  $\text{CH}_2$ ), 47.95 (menthyl CH), 41.62 (menthyl  $\text{CH}_2$ ), 36.82 (B- $\text{CH}_2$ - $\text{CH}_2$ ), 34.52 (menthyl  $\text{CH}_2$ ), 31.77, 27.21 (2 menthyl CH), 24.13 (menthyl  $\text{CH}_2$ ), 22.10, 20.67, 16.83 (3 menthyl  $\text{CH}_3$ ), 9.39 (cationic  $\text{CH}_3$ ). The B-C signal was detected indirectly at 19.8 ppm in the HSQC spectrum. Direct detection was not successful because of broadening due to coupling to  $^{10}\text{B}$  and  $^{11}\text{B}$ .

$^{11}\text{B}\{^1\text{H}\}$  NMR (128 MHz, acetone- $d_6$ , 23 °C):  $\delta$  5.65 (1B, B-O), -4.50 (1B, B-N), -8.71 (1B, B-C), -113.71 to -24.55 (9B, BH).

High resolution ESI-MS (negative mode, MeOH): *m/z* calcd for  $[\text{C}_{19}\text{H}_{37}\text{B}_{12}\text{ClINO}_2]^-$ : 476.3702; Found: 476.3707.

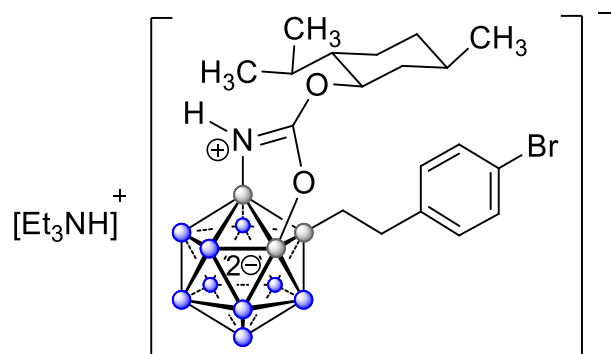

Product **14i**: 73% yield, *dr* = 71:29

$^1\text{H}\{^{11}\text{B}\}$  NMR (400 MHz, acetone- $d_6$ , 23 °C):  $\delta$  8.19 (br, 1H, anionic NH), 8.07-7.49 (br, 1H, cationic NH), 7.39-7.30 (m, 2H, phenyl H), 7.13-7.01 (m, 2H, phenyl H), 4.77-4.63 (m, 1H, menthyl CH), 3.48 (q,  $J = 7.3$  Hz, 6H, cationic N- $\text{CH}_2$ ), 2.62-2.43 (m, 2H, B- $\text{CH}_2$ - $\text{CH}_2$ ), 2.14-2.06 (overlapping with solvent residual signal m, 1H, menthyl CH), 1.94-1.82 (m, 1H, menthyl CH) 1.77-0.34 (broad overlapping m, 16H, 7 menthyl CH and 9 BH), 1.42 (t,  $J = 7.3$  Hz, 9H, cationic  $\text{CH}_3$ ), 0.90 (overlapping m, 6H, 2 menthyl  $\text{CH}_3$ ), 0.80 (d,  $J = 7.0$  Hz, 3H, menthyl  $\text{CH}_3$ ), 0.58-0.46 (m, 2H, B- $\text{CH}_2$ - $\text{CH}_2$ ).

$^{13}\text{C}\{^1\text{H}\}$  NMR (100 MHz, acetone- $d_6$ , 23 °C):  $\delta$  169.56 (C=N), 148.28, 131.35, 130.68, 118.38 (4 phenyl signals), 82.48 (menthyl CH), 48.20 (cationic  $\text{CH}_2$ ), 47.92 (menthyl CH), 41.61 (menthyl  $\text{CH}_2$ ), 36.88 (B- $\text{CH}_2$ - $\text{CH}_2$ ), 34.51 (menthyl  $\text{CH}_2$ ), 31.76, 27.20 (2 menthyl CH), 24.13 (menthyl  $\text{CH}_2$ ), 22.10, 20.66, 16.83 (3 menthyl  $\text{CH}_3$ ), 9.41 (cationic  $\text{CH}_3$ ). The B-C signal was detected indirectly at 19.8 ppm in the HSQC spectrum. Direct detection was not successful because of broadening due to coupling to  $^{10}\text{B}$  and  $^{11}\text{B}$ .

$^{11}\text{B}\{^1\text{H}\}$  NMR (128 MHz, acetone- $d_6$ , 23 °C):  $\delta$  5.43 (1B, B-O), -4.59 (1B, B-N), -8.79 (1B, B-C), -13.51 to -24.51 (9B, BH).

High resolution ESI-MS (negative mode, MeOH): *m/z* calcd for  $[\text{C}_{19}\text{H}_{37}\text{B}_{12}\text{BrNO}_2]^-$ : 520.3197; Found: 520.3204.

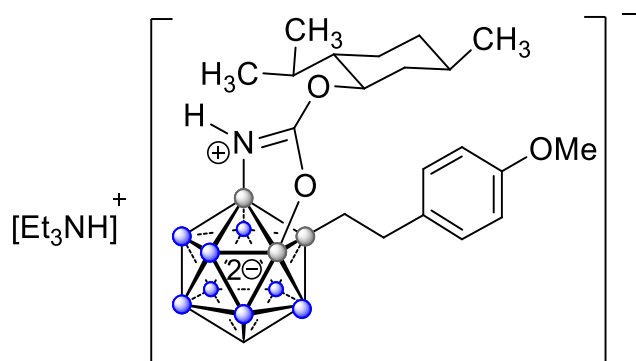

Product **14j**: 66% yield, *dr* = 70:30

$^1\text{H}\{^{11}\text{B}\}$  NMR (400 MHz, acetone- $d_6$ , 23 °C):  $\delta$  8.21 (br, 1H, anionic NH), 8.10-7.64 (br, 1H, cationic NH), 7.20-6.89 (m, 2H, phenyl H), 6.81-6.67 (m, 2H, phenyl H), 4.81-4.64 (m, 1H, menthyl CH), 3.71 (s, 3H,  $-\text{OCH}_3$ ), 3.56-3.40 (m, 6H, cationic N- $\text{CH}_2$ ), 2.59-2.41 (m, 2H, B- $\text{CH}_2$ - $\text{CH}_2$ ), 2.18-2.07 (overlapping with solvent residual signal m, 1H, menthyl CH), 1.95-1.85 (m, 1H, menthyl CH) 1.78-0.36 (broad overlapping m, 16H, 7 menthyl CH and 9 BH), 1.42 (t,  $J = 7.3$  Hz, 9H, cationic  $\text{CH}_3$ ), 0.93-0.87 (overlapping m, 6H, 2 menthyl  $\text{CH}_3$ ), 0.81 (d,  $J = 7.0$  Hz, 3H, menthyl  $\text{CH}_3$ ), 0.58-0.50 (m, 2H, B- $\text{CH}_2$ - $\text{CH}_2$ ).

$^{13}\text{C}\{^1\text{H}\}$  NMR (100 MHz, acetone- $d_6$ , 23 °C):  $\delta$  169.64 (C=N), 158.01, 140.84, 129.31, 114.07 (4 phenyl signals), 82.59 (menthyl CH), 55.32 ( $-\text{OCH}_3$ ), 48.21 (cationic  $\text{CH}_2$ ), 48.01 (menthyl CH), 41.67 (menthyl  $\text{CH}_2$ ), 36.55 (B- $\text{CH}_2$ - $\text{CH}_2$ ), 34.58 (menthyl  $\text{CH}_2$ ), 31.80, 27.24 (2 menthyl CH), 24.16 (menthyl  $\text{CH}_2$ ), 22.15, 20.70, 16.85 (3 menthyl  $\text{CH}_3$ ), 9.41 (cationic  $\text{CH}_3$ ). The B-C signal was detected indirectly at 19.9 ppm in the HSQC spectrum. Direct detection was not successful because of broadening due to coupling to  $^{10}\text{B}$  and  $^{11}\text{B}$ .

$^{11}\text{B}\{^1\text{H}\}$  NMR (128 MHz, acetone- $d_6$ , 23 °C):  $\delta$  5.52 (1B, B-O), -4.39 (1B, B-N), -8.36 (1B, B-C), -14.21 to -23.81 (9B, BH).

High resolution ESI-MS (negative mode, MeOH): *m/z* calcd for  $[\text{C}_{20}\text{H}_{40}\text{B}_{12}\text{NO}_3]^-$ : 472.4197; Found: 472.4206.

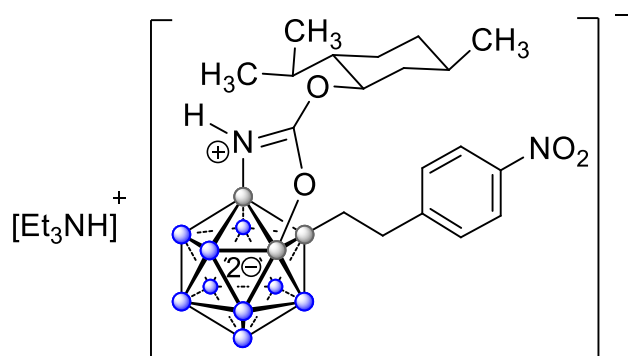

Product **14k**: 78% yield, *dr* = 72:28

$^1\text{H}\{^{11}\text{B}\}$  NMR (400 MHz, acetone- $d_6$ , 23 °C):  $\delta$  8.30 (br, 1H, anionic NH), 8.19-8.06 (m, 2H, phenyl H), 8.16-7.61 (overlapping br, 1H, cationic NH), 7.59-7.30 (m, 2H, phenyl H), 4.81-4.65 (m, 1H, menthyl CH), 3.55-3.40 (m, 6H, cationic N- $\text{CH}_2$ ), 2.77-2.58 (m, 2H, B- $\text{CH}_2$ - $\text{CH}_2$ ), 2.10-2.06 (overlapping with solvent residual signal m, 1H, menthyl CH), 1.94-1.81 (m, 1H, menthyl CH), 1.76-0.35 (broad overlapping m, 16H, 7 menthyl CH and 9 BH), 1.42 (t,  $J$  = 7.3 Hz, 9H, cationic  $\text{CH}_3$ ), 0.93-0.84 (overlapping m, 6H, 2 menthyl  $\text{CH}_3$ ), 0.78 (d,  $J$  = 6.9 Hz, 3H, menthyl  $\text{CH}_3$ ), 0.62-0.53 (m, 2H, B- $\text{CH}_2$ - $\text{CH}_2$ ).

$^{13}\text{C}\{^1\text{H}\}$  NMR (100 MHz, acetone- $d_6$ , 23 °C):  $\delta$  169.69 (C=N), 157.31, 146.45, 129.56, 123.94 (4 phenyl signals), 82.79 (menthyl CH), 48.16 (cationic  $\text{CH}_2$ ), 47.93 (menthyl CH), 41.58 (menthyl  $\text{CH}_2$ ), 37.46 (B- $\text{CH}_2$ - $\text{CH}_2$ ), 34.46 (menthyl  $\text{CH}_2$ ), 31.75, 27.21 (2 menthyl CH), 24.11 (menthyl  $\text{CH}_2$ ), 22.07, 20.65, 16.81 (3 menthyl  $\text{CH}_3$ ), 9.39 (cationic  $\text{CH}_3$ ). The B-C signal was detected indirectly at 19.0 ppm in the HSQC spectrum. Direct detection was not successful because of broadening due to coupling to  $^{10}\text{B}$  and  $^{11}\text{B}$ .

$^{11}\text{B}\{^1\text{H}\}$  NMR (128 MHz, acetone- $d_6$ , 23 °C):  $\delta$  5.60 (1B, B-O), -4.33 (1B, B-N), -8.59 (1B, B-C), -13.64 to -24.05 (9B, BH).

High resolution ESI-MS (negative mode, MeOH): *m/z* calcd for  $[\text{C}_{19}\text{H}_{37}\text{B}_{12}\text{N}_2\text{O}_4]^-$ : 487.3943; Found: 487.3951.



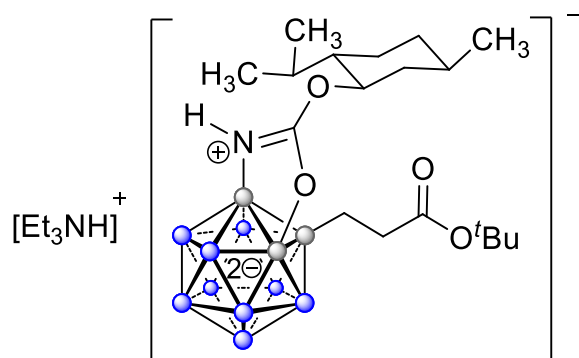

Product **14m**: 90% yield, *dr* = 51:49

$^1\text{H}\{^{11}\text{B}\}$  NMR (400 MHz, acetone- $d_6$ , 23 °C):  $\delta$  8.17 (br, 1H, anionic NH), 8.08-7.69 (broad m, 1H, cationic NH), 4.80-4.64 (m, 1H, menthyl CH), 3.47 (q,  $J$  = 7.3 Hz, 6H, cationic N- $\text{CH}_2$ ), 2.18-2.07 (overlapping with solvent residual signal m, 2H, B- $\text{CH}_2$ - $\text{CH}_2$ ), 2.02-1.84 (m, 2H, 2 menthyl CH), 1.79-0.30 (broad overlapping m, 16H, 7 menthyl CH and 9 BH), 1.42 (t,  $J$  = 7.3 Hz, 9H, cationic  $\text{CH}_3$ ), 1.38 (s, 9H,  $\text{CH}_3$   $^t\text{Bu}$ ), 0.95-0.89 (overlapping m, 6H, 2 menthyl  $\text{CH}_3$ ), 0.85-0.78 (m, 3H, menthyl  $\text{CH}_3$ ), 0.57-0.41 (m, 2H, B- $\text{CH}_2$ - $\text{CH}_2$ ).

$^{13}\text{C}\{^1\text{H}\}$  NMR (100 MHz, acetone- $d_6$ , 23 °C):  $\delta$  176.40 (C=O), 169.57 (C=N), 82.42 (menthyl CH), 78.42 (C  $^t\text{Bu}$ ), 48.11 (cationic  $\text{CH}_2$ ), 47.87 (menthyl CH), 41.57 (menthyl  $\text{CH}_2$ ), 37.23 (B- $\text{CH}_2$ - $\text{CH}_2$ ), 34.57 (menthyl  $\text{CH}_2$ ), 31.84 (menthyl CH), 28.35 ( $\text{CH}_3$   $^t\text{Bu}$ ), 27.21, (menthyl CH), 24.13 (menthyl  $\text{CH}_2$ ), 22.21, 20.86, 16.83 (3 menthyl  $\text{CH}_3$ ), 9.37 (cationic  $\text{CH}_3$ ). The B-C signal was detected indirectly at 11.9 ppm in the HSQC spectrum. Direct detection was not successful because of broadening due to coupling to  $^{10}\text{B}$  and  $^{11}\text{B}$ .

$^{11}\text{B}\{^1\text{H}\}$  NMR (128 MHz, acetone- $d_6$ , 23 °C):  $\delta$  5.28 (1B, B-O), -4.67 (1B, B-N), -9.11 (1B, B-C), -14.32 to -23.22 (9B, BH).

High resolution ESI-MS (negative mode, MeOH): *m/z* calcd for  $[\text{C}_{18}\text{H}_{42}\text{B}_{12}\text{NO}_4]^-$ : 466.4303; Found: 466.4309.

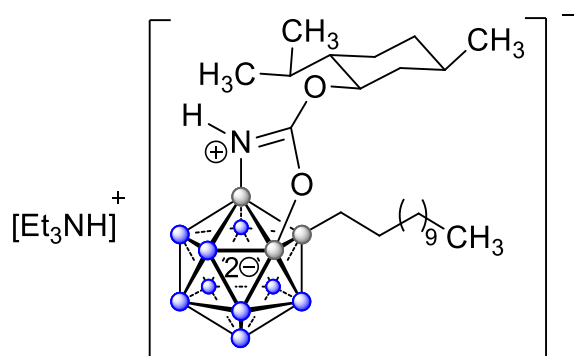

Product **14n**: 85% yield, *dr* = 50:50

$^1\text{H}\{^{11}\text{B}\}$  NMR (400 MHz, acetone- $d_6$ , 23 °C):  $\delta$  8.11 (br, 1H, anionic NH), 8.00-7.51 (broad m, 1H, cationic NH), 4.80-4.61 (m, 1H, menthyl CH), 3.47 (q,  $J$  = 7.3 Hz, 6H, cationic N- $\text{CH}_2$ ), 2.17-2.06 (overlapping with solvent residual signal m, 1H, menthyl CH), 2.02-1.85 (m, 1H, menthyl CH), 1.76-0.08 (broad overlapping m, 16H, 7 menthyl CH and 9 BH), 1.41 (t,  $J$  = 7.3 Hz, 9H, cationic  $\text{CH}_3$ ), 1.30-1.08 (overlapping m, 20H, 8 dodecyl  $\text{CH}_2$ ), 0.95-0.90 (overlapping m, 6H 2 menthyl  $\text{CH}_3$ ), 0.90-0.85 (m, 3H, dodecyl  $\text{CH}_3$ ), 0.85-0.79 (m, 3H, menthyl  $\text{CH}_3$ ), 0.33-0.10 (m, 2H, B- $\text{CH}_2$ - $\text{CH}_2$ ).

$^{13}\text{C}\{^1\text{H}\}$  NMR (100 MHz, acetone- $d_6$ , 23 °C):  $\delta$  169.48 (C=N), 82.21 (menthyl CH), 48.18 (cationic  $\text{CH}_2$ ), 47.77 (menthyl CH), 41.55 (menthyl  $\text{CH}_2$ ), 34.54 (B- $\text{CH}_2$ - $\text{CH}_2$ ), 32.57 (menthyl  $\text{CH}_2$ ), 31.74 (menthyl CH), 31.11, 30.69, 30.62, 30.53, 30.49, 30.41, 30.33, 30.01 ( $\text{CH}_2$  dodecane), 26.98 (menthyl CH), 23.94 (menthyl  $\text{CH}_2$ ), 23.26 ( $\text{CH}_2$  dodecane), 22.10, 20.65, 16.94 (3 menthyl  $\text{CH}_3$ ), 14.32 ( $\text{CH}_3$  dodecane), 9.37 (cationic  $\text{CH}_3$ ). The B-C signal was detected indirectly at 16.7 ppm in the HSQC spectrum. Direct detection was not successful because of broadening due to coupling to  $^{10}\text{B}$  and  $^{11}\text{B}$ .

$^{11}\text{B}\{^1\text{H}\}$  NMR (128 MHz, acetone- $d_6$ , 23 °C):  $\delta$  5.25 (1B, B-O), -4.56 (1B, B-N), -8.26 (1B, B-C), -14.13 to -23.88 (9B, BH).

High resolution ESI-MS (negative mode, MeOH): *m/z* calcd for  $[\text{C}_{23}\text{H}_{54}\text{B}_{12}\text{NO}_2]^-$ : 506.5344; Found: 506.5353.

### General procedure for the synthesis of cyclized compounds **15** and **16**:

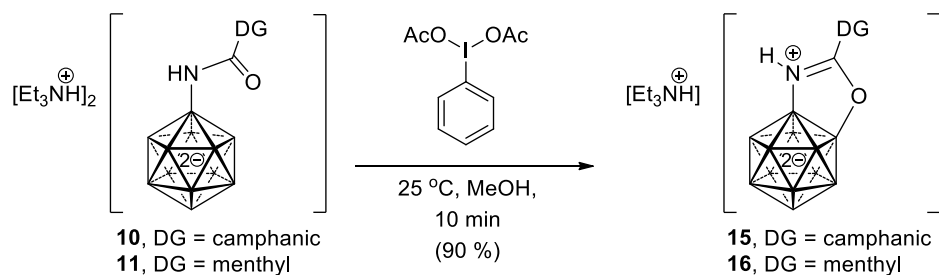

A 20 mL vial was charged with **10** or **11** (0.20 mmol, 1 equiv), (diacetoxy)iodobenzene (0.22 mmol, 1.1 equiv) and magnetic stir bar. Then MeOH (6 mL) was added. The reaction mixture was stirred at  $25\text{ }^\circ\text{C}$  for 10 min.  $\text{Et}_3\text{N}$  (0.5 mL) was added, and the solution was concentrated on a rotary evaporator. The residue was purified by silica gel column chromatography (eluent DCM/MeCN = 9 : 1, fraction size 15-20 mL). The combined eluates were concentrated on a rotary evaporator and dried under vacuum overnight at  $25\text{ }^\circ\text{C}$  to afford products **15** or **16** as colorless solids.



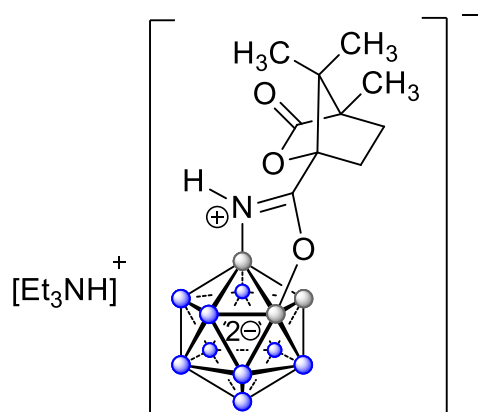

Product **15**: 90% yield.

$^1\text{H}\{^{11}\text{B}\}$  NMR (400 MHz, acetone- $d_6$ , 23 °C):  $\delta$  10.09 (br, 1H, cationic NH), 3.50 (q,  $J = 7.3$  Hz, 6H, cationic N-CH), 2.58 (ddd,  $J = 14.7, 10.9, 4.2$  Hz, 1H, camphanic CH), 2.17-2.07 (m, 1H, camphanic CH), 1.94 (ddd,  $J = 13.6, 9.3, 4.4$  Hz, 1H, camphanic CH), 1.73-0.62 (broad overlapping m, 10H, BH), 1.73-1.63 (m, 1H, camphanic  $\text{CH}_2$ ) 1.43 (t,  $J = 7.3$  Hz, 9H, cationic N- $\text{CH}_2\text{-CH}_3$ ), 1.09 (overlapping s, 6H, camphanic  $\text{CH}_3$ ), 0.91 (s, 3H, camphanic  $\text{CH}_3$ ). Only one N-H signal was detected clearly.

$^{13}\text{C}\{^1\text{H}\}$  NMR (100 MHz, acetone- $d_6$ , 23 °C):  $\delta$  180.71 (C=N), 177.33 (C=O), 90.68, 55.76, 55.75 (3 camphanic C), 48.20 (cationic  $\text{CH}_2$ ), 30.98, 29.37 (2 camphanic  $\text{CH}_2$ ), 16.82, 18.89, 9.95 (3 camphanic  $\text{CH}_3$ ), 9.41 (cationic  $\text{CH}_3$ ).

$^{11}\text{B}\{^1\text{H}\}$  NMR (128 MHz, acetone- $d_6$ , 23 °C):  $\delta$  -6.63 (1B, B-O), -4.45 (1B, B-N), -15.10 to -20.30 (overlapping signals, 8B, BH), -20.91 (1B, BH), -22.22 (1B, BH).

High resolution ESI-MS (negative mode, MeOH):  $m/z$  calcd for  $[\text{C}_{10}\text{H}_{24}\text{B}_{12}\text{NO}_3]^-$ : 336.2945; Found: 336.2951

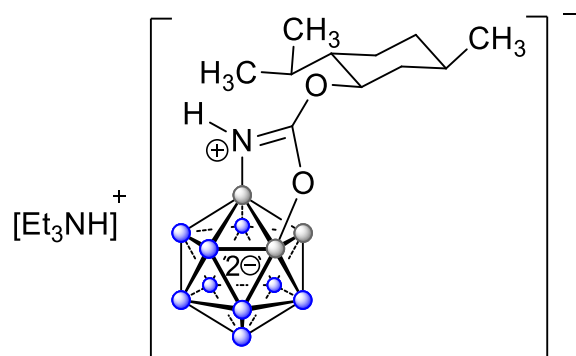

Product **16**: 90% yield

$^1\text{H}\{^{11}\text{B}\}$  NMR (400 MHz, acetone- $d_6$ , 23 °C):  $\delta$  8.14 (br, 1H, anionic NH), 4.69 (ddd,  $J = 10.9$ , 10.9, 4.4 Hz, 1H, menthyl CH), 3.49 (q,  $J = 7.3$  Hz, 6H, cationic N- $\text{CH}_2$ ), 2.04-1.99 (m overlapping with solvent residual signal, 1H, menthyl CH), 1.97-1.85 (m, 1H, menthyl CH), 1.79 – 0.7 (broad overlapping m, 17H, 7 menthyl CH and 10 BH), 1.42 (t,  $J = 7.3$  Hz, 9H, cationic  $\text{CH}_3$ ), 0.93 (d,  $J = 6.5$  Hz, 3H, menthyl  $\text{CH}_3$ ), 0.90 (d,  $J = 7.0$  Hz, 3H, menthyl  $\text{CH}_3$ ), 0.79 (d,  $J = 6.9$  Hz, 3H, menthyl  $\text{CH}_3$ ). Only one N-H signal was detected clearly.

$^{13}\text{C}\{^1\text{H}\}$  NMR (100 MHz, acetone- $d_6$ , 23 °C):  $\delta$  170.15 (C=N), 82.44 (menthyl CH), 48.21 (cationic  $\text{CH}_2$ ), 48.18 (menthyl CH), 41.58, 34.63 (2 menthyl  $\text{CH}_2$ ), 31.88, 27.13 (2 menthyl CH), 24.09 (menthyl  $\text{CH}_2$ ), 22.14, 20.75, 16.78 (3 menthyl  $\text{CH}_3$ ), 9.40 (cationic  $\text{CH}_3$ ).

$^{11}\text{B}\{^1\text{H}\}$  NMR (128 MHz, acetone- $d_6$ , 23 °C):  $\delta$  5.80 (1B, B-O), -4.36 (1B, B-N), -13.7 to -23.9 (10B, BH).

High resolution ESI-MS (negative mode, MeOH):  $m/z$  calcd for  $[\text{C}_{11}\text{H}_{30}\text{B}_{12}\text{NO}_2]^-$ : 338.3466; Found: 338.3471.

### III X-ray Crystallography

#### Crystal structure of 10

[Et<sub>3</sub>NH]<sub>2</sub>[10] (20 mg) was dissolved in acetone (0.6 mL) in a 5 mm NMR tube. This solution was layered with hexane (1 mL) and cooled to 4 °C in a refrigerator. Crystals of the composition [Et<sub>3</sub>NH]<sub>4</sub>[10]<sub>2</sub>·acetone suitable for X-ray diffraction were obtained within 15 days.

---

|                        |                                            |                                           |                          |
|------------------------|--------------------------------------------|-------------------------------------------|--------------------------|
| Bond precision:        | C-C = 0.0043 Å                             | Wavelength=1.54178                        |                          |
| Cell:                  | a=18.2099(5)<br>alpha=90                   | b=10.1365(3)<br>beta=103.548(1)           | c=19.5538(5)<br>gamma=90 |
| Temperature:           | 170 K                                      |                                           |                          |
|                        | Calculated                                 | Reported                                  |                          |
| Volume                 | 3508.90(17)                                | 3508.90(17)                               |                          |
| Space group            | P 21                                       | P 1 21 1                                  |                          |
| Hall group             | P 2yb                                      | P 2yb                                     |                          |
| Moiety formula         | 2(C10 H25 B12 N O3), 4(C6 H16 N), C3 H6 O  | 2(C10 H25 B12 N O3), C3 H6 O, 4(C6 H16 N) |                          |
| Sum formula            | C47 H120 B24 N6 O7                         | C47 H120 B24 N6 O7                        |                          |
| Mr                     | 1140.93                                    | 1140.92                                   |                          |
| Dx, g cm <sup>-3</sup> | 1.080                                      | 1.080                                     |                          |
| Z                      | 2                                          | 2                                         |                          |
| Mu (mm <sup>-1</sup> ) | 0.483                                      | 0.483                                     |                          |
| F000                   | 1240.0                                     | 1240.0                                    |                          |
| F000'                  | 1242.97                                    |                                           |                          |
| h, k, lmax             | 21, 12, 23                                 | 21, 12, 23                                |                          |
| Nref                   | 12912[ 6850]                               | 12833                                     |                          |
| Tmin, Tmax             | 0.901, 0.953                               | 0.655, 0.753                              |                          |
| Tmin'                  | 0.793                                      |                                           |                          |
| Correction method=     | # Reported T Limits: Tmin=0.655 Tmax=0.753 |                                           |                          |
| AbsCorr =              | MULTI-SCAN                                 |                                           |                          |
| Data completeness=     | 1.87/0.99                                  | Theta(max)= 68.452                        |                          |
| R(reflections)=        | 0.0526( 12514)                             | wR2(reflections)= 0.1446( 12833)          |                          |
| S =                    | 1.039                                      | Npar= 835                                 |                          |

---

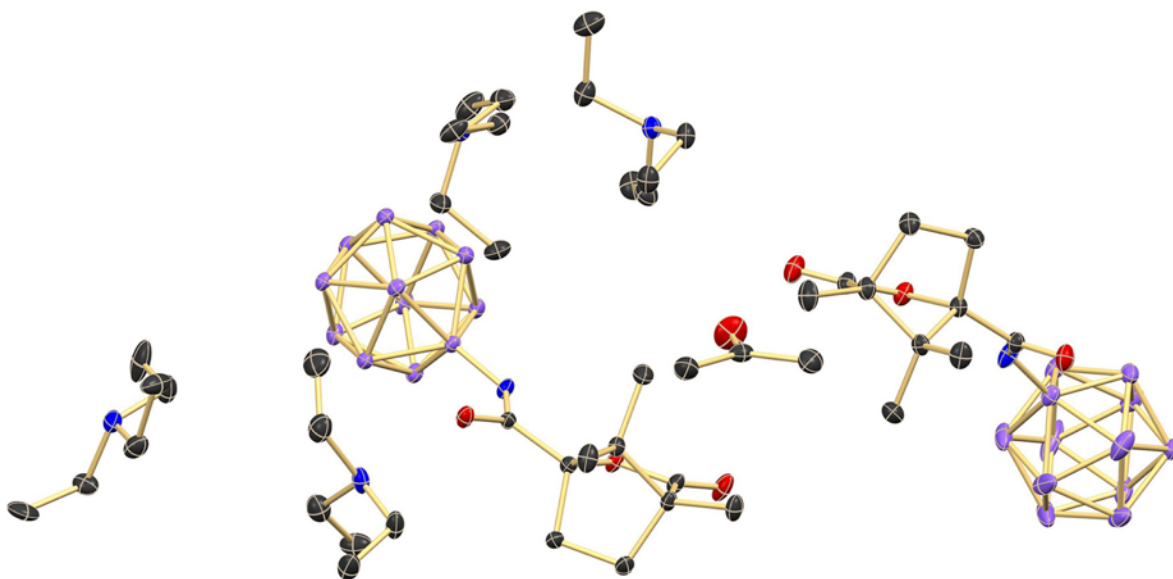

**Figure S7.** ORTEP representation of [Et<sub>3</sub>NH]<sub>4</sub>[10]<sub>2</sub>·acetone. Hydrogen atoms are omitted for clarity; 25% displacement ellipsoids.

## Crystal structure of 13a

[Et<sub>3</sub>NH][13a] (10 mg) was dissolved in ethanol (0.5 mL) in a 4 mL glass vial. Distilled water (0.2 mL) was added, resulting in a turbid mixture. Heating to 80 °C gave a clear solution. The mixture was allowed to cool to room temperature slowly. The glass vial was kept undisturbed and partially open at room temperature for 20 days, yielding a small number of crystals of the composition [Et<sub>3</sub>NH]<sub>4</sub>[13a]<sub>4</sub>·5H<sub>2</sub>O suitable for X-ray diffraction.

---

|                        |                                            |                                        |               |
|------------------------|--------------------------------------------|----------------------------------------|---------------|
| Bond precision:        | C-C = 0.0079 A                             | Wavelength=0.71073                     |               |
| Cell:                  | a=11.3285(9)                               | b=29.264(2)                            | c=20.0792(16) |
|                        | alpha=90                                   | beta=90.084(2)                         | gamma=90      |
| Temperature:           | 170 K                                      |                                        |               |
|                        | Calculated                                 | Reported                               |               |
| Volume                 | 6656.6(9)                                  | 6656.7(9)                              |               |
| Space group            | P 21                                       | P 1 21 1                               |               |
| Hall group             | P 2yb                                      | P 2yb                                  |               |
| Moiety formula         | 4(C18 H32 B12 N O3), 4(C6 H16 N), 5(H2 O)  | C18 H32 B12 N O3, 1.25(H2 O), C6 H16 N |               |
| Sum formula            | C96 H202 B48 N8 O17                        | C24 H50.50 B12 N2 O4.25                |               |
| Mr                     | 2259.54                                    | 564.88                                 |               |
| Dx, g cm <sup>-3</sup> | 1.127                                      | 1.127                                  |               |
| Z                      | 2                                          | 8                                      |               |
| Mu (mm <sup>-1</sup> ) | 0.068                                      | 0.068                                  |               |
| F000                   | 2420.0                                     | 2420.0                                 |               |
| F000'                  | 2420.80                                    |                                        |               |
| h,k,lmax               | 13,35,24                                   | 13,35,24                               |               |
| Nref                   | 24487[ 12503]                              | 24247                                  |               |
| Tmin,Tmax              | 0.990,0.995                                | 0.694,0.745                            |               |
| Tmin'                  | 0.980                                      |                                        |               |
| Correction method=     | # Reported T Limits: Tmin=0.694 Tmax=0.745 |                                        |               |
| AbsCorr =              | MULTI-SCAN                                 |                                        |               |
| Data completeness=     | 1.94/0.99                                  | Theta(max)= 25.385                     |               |
| R(reflections)=        | 0.0465( 22184)                             | wR2(reflections)= 0.1220( 24247)       |               |
| S =                    | 1.021                                      | Npar= 1587                             |               |

---

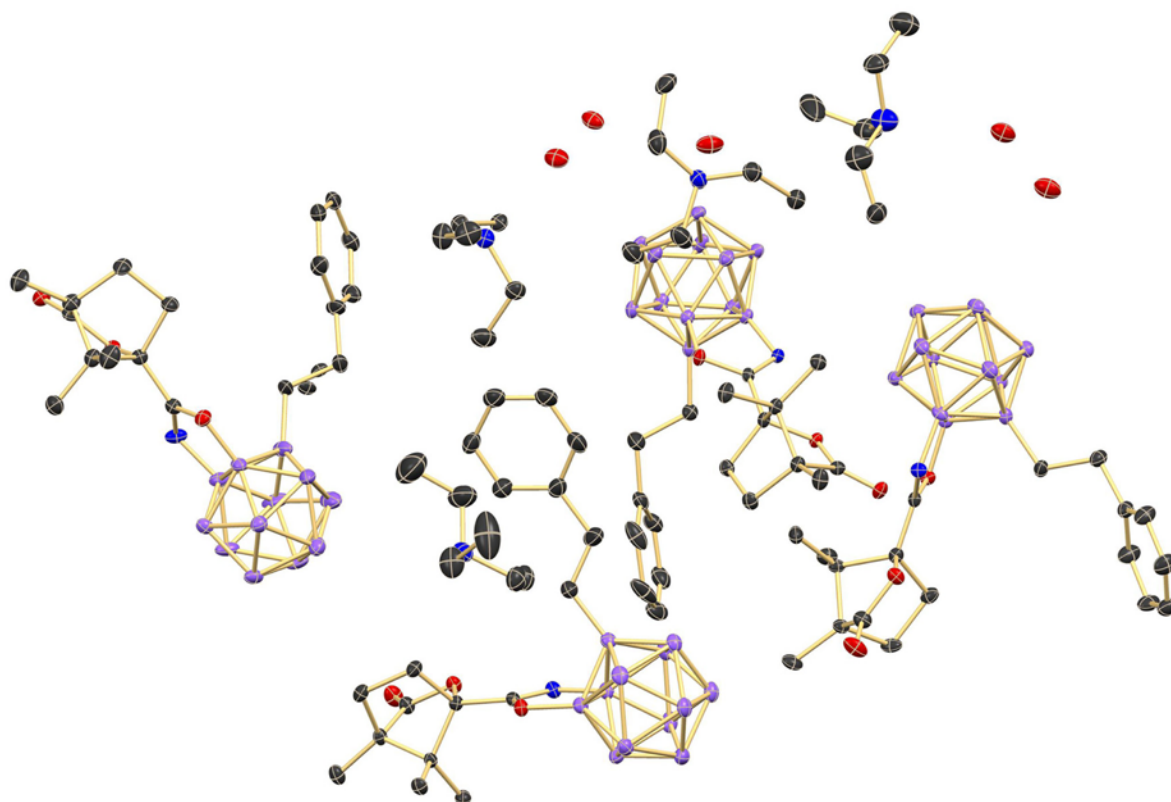

**Figure S8.** ORTEP representation of  $[\text{Et}_3\text{NH}]_4[\mathbf{13a}]_4 \cdot 5\text{H}_2\text{O}$ . Hydrogen atoms are omitted for clarity; 25% displacement ellipsoids. The ethylene group of one out of four anionic molecules in the asymmetric unit is disordered in a 71:29 ratio; otherwise there is no disorder with regard to other parts of the structure.

## IV Evaluation of Antimicrobial Properties

### Antimicrobial susceptibility testing

The minimal inhibitory concentrations (MICs) of compounds and antibiotics ceftriaxone, azithromycin and ciprofloxacin were determined using the agar dilution method. Bacterial suspensions ( $10^4$  CFU) of international reference strains *Neisseria gonorrhoeae* ATCC 49226, *Staphylococcus aureus* ATCC 25923, *Enterococcus faecalis* ATCC 29212, *Acinetobacter baumannii* ATCC 19606, *Klebsiella pneumoniae* ATCC 700603, *Pseudomonas aeruginosa* ATCC 27853, *Escherichia coli* ATCC 25922, *Enterobacter cloacae* ATCC 700323, *Stenotrophomonas maltophilia* ATCC 17666, *Listeria monocytogenes* EGDe and *Shigella sonnei* SD10053, and *N. gonorrhoeae* multidrug-resistant clinical isolates ZJXSH 89 and ZJXSH 86 were inoculated on the surface of agar plates containing two-fold dilution series of compounds or antibiotics. Agar plates were incubated for 24-48 h at 37 °C and 5% CO<sub>2</sub> and growth was determined. The MIC was defined as the lowest concentration at which no growth was observed.

### Determination of bactericidal activity

*N. gonorrhoeae* ATCC 49226 and *S. aureus* ATCC 25923 were suspended in 12 mL GC broth (Oxoid) supplemented with 1% Vitox (Oxoid) at a concentration of  $10^6$ - $10^7$  CFU/mL and incubated for 1 h at 37 °C and 200 rpm. Subsequently, compound 14k or the control antibiotics ceftriaxone (*N. gonorrhoeae*) or vancomycin (*S. aureus*) were added at 4×, 2×, 1× or 0.5× the MIC. The vehicle only was included as control. Samples were taken after 0.5, 1, 2, 4 and 8 h for CFU determination on GC agar with 1% Vitox after 24-48 h incubation at 37 °C and 5% CO<sub>2</sub>. For live/dead staining, samples were taken after 1 h incubation, washed with PBS and incubated for 15 minutes at room temperature with SYTO 9 (1.67 μM) and propidium iodide (10 μM) stains (Thermo). After washing, fluorescence was visualized on an Olympus FV1000 confocal microscope.

**Table S1.** MIC data ( $\mu\text{M}$ ) for compounds against references strains of various Gram-positive and Gram-negative species

| Compound                                                         | Gram-negative                           |                                                |                                    |                                          |                                           |                                |                                          |                                         | Gram-positive                           |                                         |                                    |
|------------------------------------------------------------------|-----------------------------------------|------------------------------------------------|------------------------------------|------------------------------------------|-------------------------------------------|--------------------------------|------------------------------------------|-----------------------------------------|-----------------------------------------|-----------------------------------------|------------------------------------|
|                                                                  | <i>Neisseria gonorrhoeae</i> ATCC 49226 | <i>Stenotrophomonas maltophilia</i> ATCC 17666 | <i>Escherichia coli</i> ATCC 25922 | <i>Pseudomonas aeruginosa</i> ATCC 27853 | <i>Acinetobacter baumannii</i> ATCC 19606 | <i>Shigella sonnei</i> SD10053 | <i>Klebsiella pneumoniae</i> ATCC 700603 | <i>Enterobacter cloacae</i> ATCC 700323 | <i>Staphylococcus aureus</i> ATCC 25923 | <i>Enterococcus faecalis</i> ATCC 29212 | <i>Listeria monocytogenes</i> EGDc |
| <b>10</b>                                                        | >256                                    | >256                                           | >256                               | >256                                     | >256                                      | >256                           | >256                                     | >256                                    | >256                                    | >256                                    | >256                               |
| <b>13a</b>                                                       | 16                                      | >256                                           | >256                               | >256                                     | >256                                      | >256                           | >256                                     | >256                                    | 128                                     | 128                                     | >256                               |
| <b>13b</b>                                                       | 16                                      | >256                                           | >256                               | >256                                     | >256                                      | >256                           | >256                                     | >256                                    | 32                                      | 64                                      | >256                               |
| <b>13c</b>                                                       | 16                                      | >256                                           | >256                               | >256                                     | >256                                      | >256                           | >256                                     | >256                                    | 64                                      | >256                                    | >256                               |
| <b>13d</b>                                                       | 8                                       | >256                                           | >256                               | >256                                     | >256                                      | >256                           | >256                                     | >256                                    | 64                                      | >256                                    | >256                               |
| <b>13e</b>                                                       | 16                                      | >256                                           | >256                               | >256                                     | >256                                      | >256                           | >256                                     | >256                                    | 64                                      | 64                                      | >256                               |
| <b>13f</b>                                                       | 8                                       | >256                                           | >256                               | >256                                     | >256                                      | >256                           | >256                                     | >256                                    | 8                                       | 16                                      | >256                               |
| <b>13g</b>                                                       | 64                                      | >256                                           | >256                               | >256                                     | >256                                      | >256                           | >256                                     | >256                                    | 256                                     | 256                                     | >256                               |
| <b>13h</b>                                                       | 4                                       | >256                                           | >256                               | >256                                     | >256                                      | >256                           | >256                                     | >256                                    | 16                                      | 32                                      | >256                               |
| <b>13i</b>                                                       | 4                                       | 256                                            | >256                               | >256                                     | >256                                      | >256                           | >256                                     | >256                                    | 16                                      | 16                                      | >256                               |
| <b>13j</b>                                                       | 32                                      | >256                                           | >256                               | >256                                     | >256                                      | >256                           | >256                                     | >256                                    | 64                                      | 64                                      | >256                               |
| <b>13k</b>                                                       | 8                                       | >256                                           | >256                               | >256                                     | >256                                      | >256                           | >256                                     | >256                                    | 64                                      | 64                                      | >256                               |
| <b>15</b>                                                        | >256                                    | >256                                           | >256                               | >256                                     | >256                                      | >256                           | >256                                     | >256                                    | >256                                    | >256                                    | >256                               |
| <b>11</b>                                                        | 128                                     | >256                                           | >256                               | >256                                     | >256                                      | >256                           | >256                                     | >256                                    | >256                                    | >256                                    | >256                               |
| <b>14a</b>                                                       | 4                                       | 64                                             | >256                               | >256                                     | >256                                      | >256                           | >256                                     | >256                                    | 4                                       | 4                                       | 8                                  |
| <b>14b</b>                                                       | 8                                       | 64                                             | >256                               | >256                                     | >256                                      | >256                           | >256                                     | >256                                    | 8                                       | 8                                       | 16                                 |
| <b>14c</b>                                                       | 16                                      | 256                                            | >256                               | >256                                     | >256                                      | >256                           | >256                                     | >256                                    | 8                                       | 16                                      | 16                                 |
| <b>14d</b>                                                       | 8                                       | 32                                             | >256                               | >256                                     | >256                                      | >256                           | >256                                     | >256                                    | 4                                       | 8                                       | 8                                  |
| <b>14e</b>                                                       | 4                                       | 128                                            | >256                               | >256                                     | >256                                      | >256                           | >256                                     | >256                                    | 4                                       | 8                                       | 16                                 |
| <b>14f</b>                                                       | 8                                       | 256                                            | >256                               | >256                                     | >256                                      | >256                           | >256                                     | >256                                    | 16                                      | 16                                      | 16                                 |
| <b>14g</b>                                                       | 4                                       | >256                                           | >256                               | >256                                     | >256                                      | >256                           | >256                                     | >256                                    | 4                                       | 32                                      | 32                                 |
| <b>14h</b>                                                       | 4                                       | 16                                             | >256                               | >256                                     | >256                                      | >256                           | >256                                     | >256                                    | 4                                       | 4                                       | 8                                  |
| <b>14i</b>                                                       | 4                                       | 32                                             | >256                               | >256                                     | >256                                      | >256                           | >256                                     | >256                                    | 4                                       | 4                                       | 4                                  |
| <b>14j</b>                                                       | 4                                       | 64                                             | >256                               | >256                                     | >256                                      | >256                           | >256                                     | >256                                    | 4                                       | 8                                       | 8                                  |
| <b>14k</b>                                                       | 2                                       | >256                                           | >256                               | >256                                     | >256                                      | >256                           | >256                                     | >256                                    | 4                                       | 4                                       | 32                                 |
| <b>14l</b>                                                       | 4                                       | 128                                            | >256                               | >256                                     | >256                                      | >256                           | >256                                     | >256                                    | 8                                       | 16                                      | >256                               |
| <b>14m</b>                                                       | 4                                       | 128                                            | >256                               | >256                                     | >256                                      | >256                           | >256                                     | >256                                    | 8                                       | 8                                       | >256                               |
| <b>14n</b>                                                       | 16                                      | >256                                           | >256                               | >256                                     | >256                                      | >256                           | >256                                     | >256                                    | >256                                    | 64                                      | >256                               |
| <b>16</b>                                                        | 16                                      | >256                                           | >256                               | >256                                     | >256                                      | >256                           | >256                                     | >256                                    | 64                                      | 128                                     | >256                               |
| (-)-Menthol                                                      | >256                                    | >256                                           | >256                               | >256                                     | >256                                      | >256                           | >256                                     | >256                                    | >256                                    | >256                                    | >256                               |
| (-)-Camphanic Acid                                               | >256                                    | >256                                           | >256                               | >256                                     | >256                                      | >256                           | >256                                     | >256                                    | >256                                    | >256                                    | >256                               |
| [B <sub>12</sub> H <sub>11</sub> -NH <sub>3</sub> ] <sup>-</sup> | >256                                    | >256                                           | >256                               | >256                                     | >256                                      | >256                           | >256                                     | >256                                    | >256                                    | >256                                    | >256                               |



**Table S2.** MIC data ( $\mu\text{M}$ ) for selected compounds and marketed antibiotics against different strains of *Neisseria gonorrhoeae*

| Compound                         | 13 d | 13 f | 13 h | 13 i | 13 k | 14 a | 14 b | 14 d | 14 e | 14 f | 14 g | 14 h | 14 i | 14 j | 14 k | 14 l | 14 m | Ceftriaxone | Azithromycin | Ciprofloxacin |
|----------------------------------|------|------|------|------|------|------|------|------|------|------|------|------|------|------|------|------|------|-------------|--------------|---------------|
| <i>N. gonorrhoeae</i> ATCC 49226 | 8    | 8    | 4    | 4    | 8    | 4    | 8    | 8    | 4    | 8    | 4    | 4    | 4    | 4    | 2    | 4    | 4    | 0.008       | 0.016        | 0.03          |
| <i>N. gonorrhoeae</i> ZJXSH 89   | 8    | 8    | 4    | 4    | 8    | 4    | 8    | 8    | 4    | 16   | 4    | 4    | 4    | 4    | 2    | 4    | 4    | 0.016       | 2048         | 48            |
| <i>N. gonorrhoeae</i> ZJXSH 86   | 8    | 8    | 4    | 4    | 8    | 4    | 8    | 8    | 4    | 8    | 4    | 4    | 4    | 4    | 2    | 4    | 4    | 0.008       | 0.016        | 48            |

## V References

- [1] V. Geis, K. Gutsche, C. Knapp, H. Scherer, R. Uzun, *Dalton Trans.* **2009**, 2687–2694.
- [2] O. Bondarev, A. A. Khan, X. Tu, Y. V. Sevrugina, S. S. Jalisatgi, M. F. Hawthorne, *J. Am. Chem. Soc.* **2013**, *135*, 13204–13211.
- [3] J. R. Holmes D. Kivelson, W. C. Drinkard, *J. Chem. Phys.* **1962**, *37*, 150–152;  
a more recent summary is available online from the Sigma-Aldrich company:  
[https://www.sigmaaldrich.com/content/dam/sigma-aldrich/docs/Aldrich/General\\_Information/double\\_water\\_peaks.pdf](https://www.sigmaaldrich.com/content/dam/sigma-aldrich/docs/Aldrich/General_Information/double_water_peaks.pdf)
- [4] B. Klaic, Z. Raza, R. Marcec, V. Vinkovic, V. Unjic, *Spectroscopy Letters* **1995**, *28*, 683–697; J. Hartner, U. M. Reinscheid, *J. Mol. Struct.* **2008**, *872*, 145–149.
- [5] Y. Zhang, Y. Sun, F. Lin, J. Liu, S Duttwyler, *Angew. Chem. Int. Ed.* **2016**, *55*, 15609–15614.

20190630-B12C 20 mg white solid  $[\text{Et}_3\text{NH}]_2[\text{B}_{12}\text{H}_{11}\text{NHCOCamphanic}]$  dissolved in 0.6 mL acetone- $d_6$   
 400MHz  $^1\text{H}$  NMR,  $\circ$  deuterated solvent residual peak= 2.05 ppm;  $\diamond$  water peak

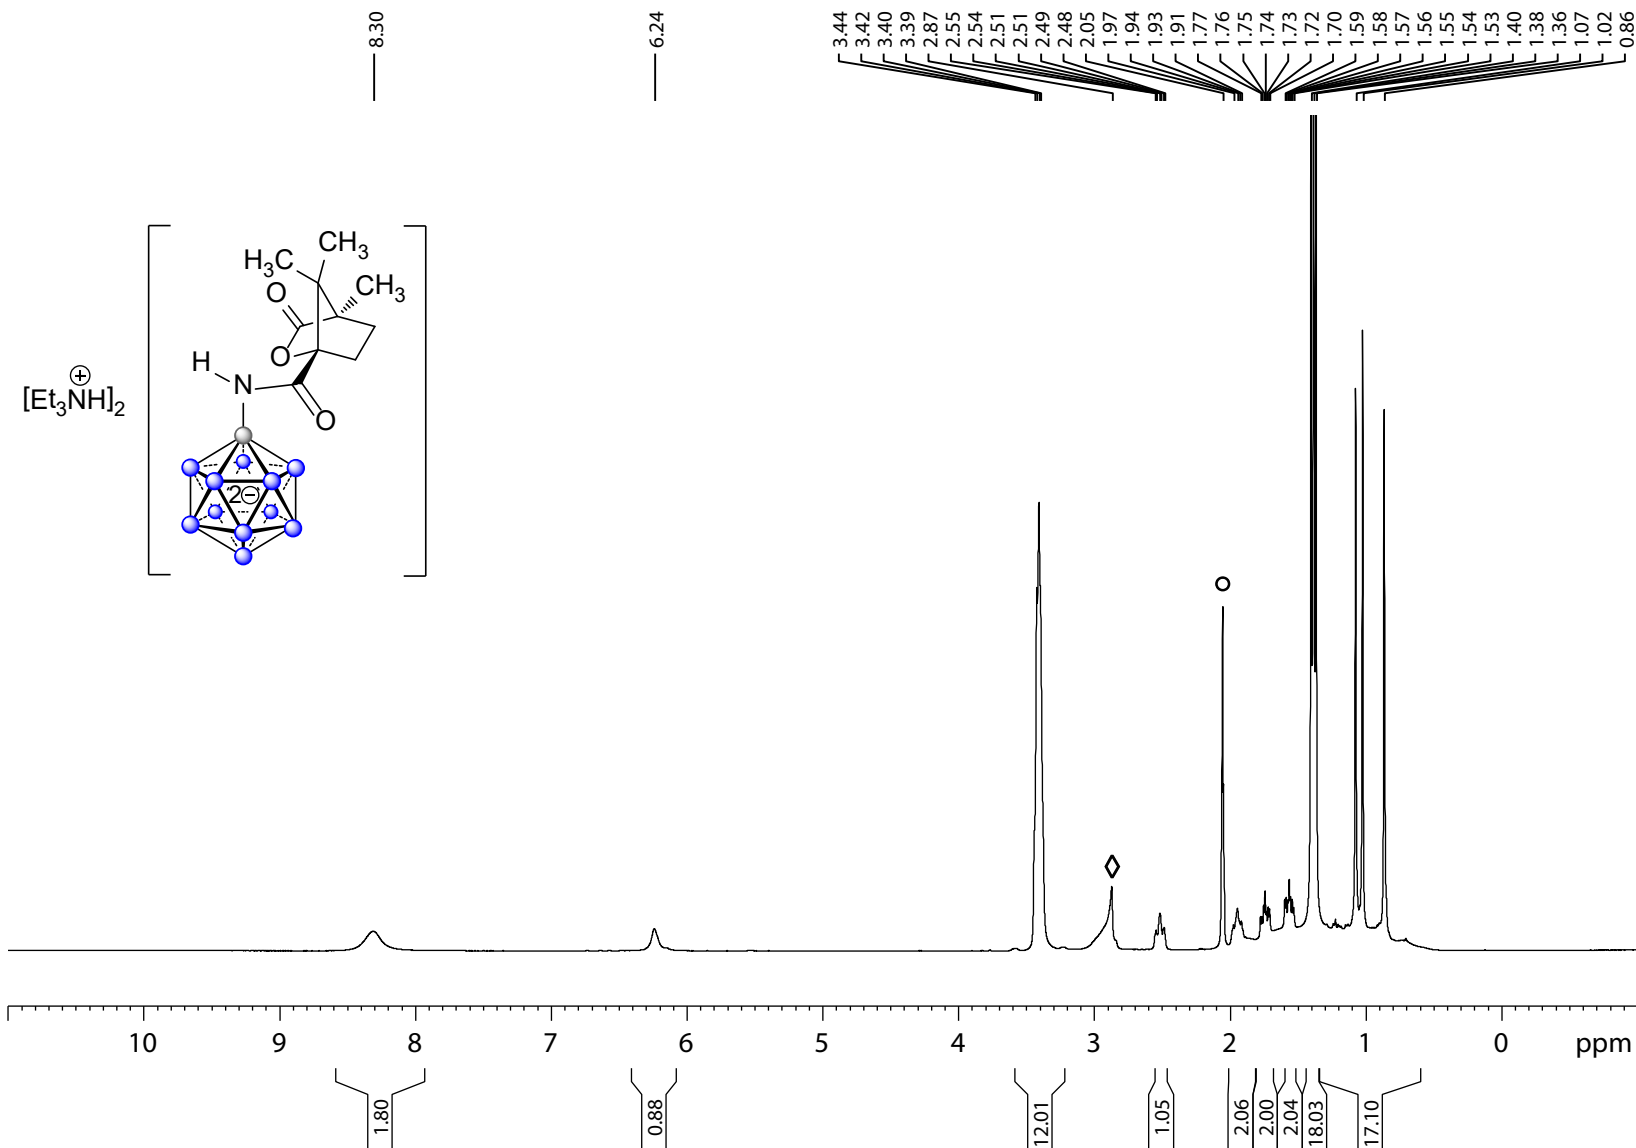

```

Current Data Parameters
NAME      20190630-RV-B12C
EXPNO     1
PROCNO    1

F2 - Acquisition Parameters
Date_     20190701
Time_     9.21
INSTRUM   spect
PROBHD    5 mm PABBO BB/
PULPROG   zg30
TD         65536
SOLVENT   Acetone
NS         16
DS         2
SWH        10000.000 Hz
FIDRES     0.152588 Hz
AQ         3.2767999 sec
RG         107.6
DW         50.000 usec
DE         6.50 usec
TE         296.0 K
D1         1.00000000 sec
TD0        1

===== CHANNEL f1 =====
NUC1      1H
P1        15.00 usec
PLW1      12.50000000 W
SFO1      400.1328009 MHz

F2 - Processing parameters
SI        65536
SF        400.1300075 MHz
WDW       EM
SSB       0
LB        1.00 Hz
GB        0
PC        1.00
    
```

20190630-B12C 20 mg white solid  $[\text{Et}_3\text{NH}]_2[\text{B}_{12}\text{H}_{11}\text{NHCOCamphanic}]$  dissolved in 0.6 mL acetone- $d_6$   
 400MHz  $^1\text{H}\{\text{B}\}$  NMR,  $\circ$  deuterated solvent residual peak = 2.05 ppm;  $\diamond$  water peak

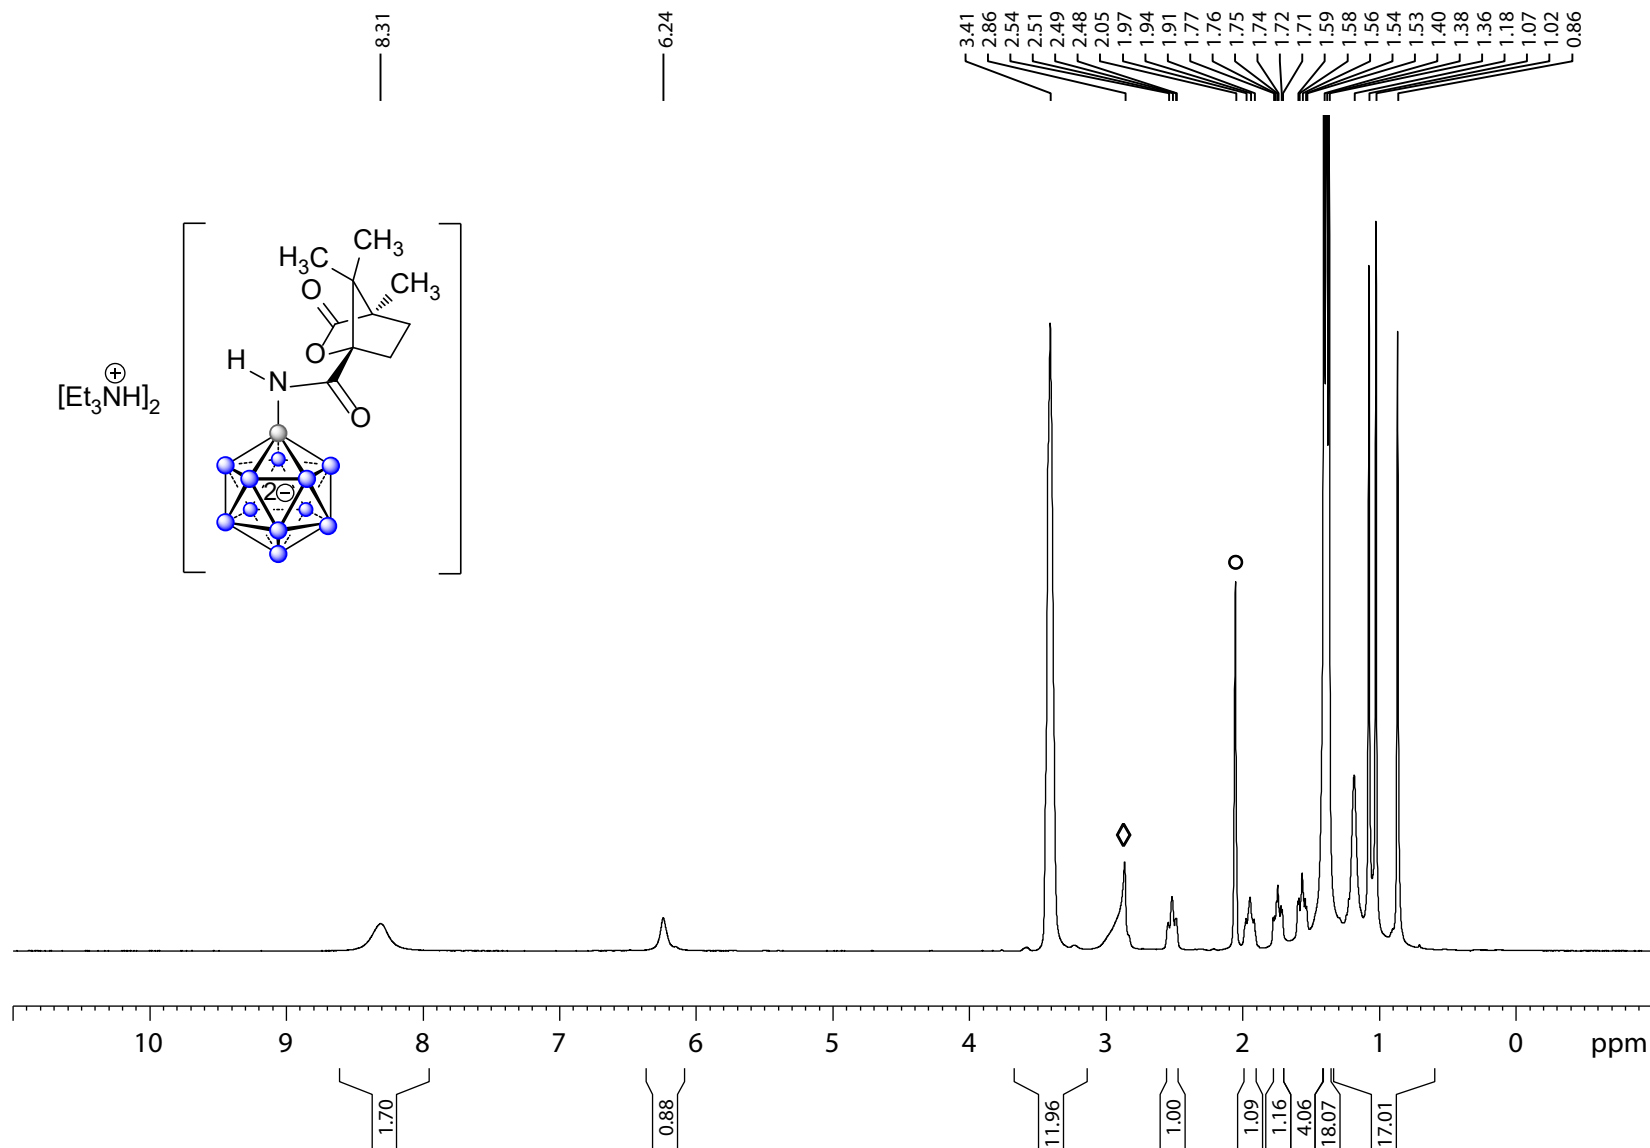

Current Data Parameters  
 NAME 20190630-RV-B12C  
 EXPNO 2  
 PROCNO 1

F2 - Acquisition Parameters  
 Date\_ 20190701  
 Time\_ 9.23  
 INSTRUM spect  
 PROBHD 5 mm PABBO BB/  
 PULPROG zgig30  
 TD 16384  
 SOLVENT Acetone  
 NS 16  
 DS 4  
 SWH 8012.820 Hz  
 FIDRES 0.489064 Hz  
 AQ 1.0223616 sec  
 RG 107.6  
 DW 62.400 usec  
 DE 6.50 usec  
 TE 296.3 K  
 D1 1.00000000 sec  
 D11 0.03000000 sec  
 TDO 1

===== CHANNEL f1 =====  
 NUC1 1H  
 P1 15.00 usec  
 PLW1 12.50000000 W  
 SFO1 400.1320007 MHz

===== CHANNEL f2 =====  
 CPDPRG[2] garp4  
 NUC2 11B  
 PCPD2 90.00 usec  
 PLW2 52.96599960 W  
 PLW12 0.64477998 W  
 SFO2 128.3776050 MHz

F2 - Processing parameters  
 SI 32768  
 SF 400.1300074 MHz  
 WDW EM  
 SSB 0  
 LB 1.00 Hz  
 GB 0  
 PC 1.40

NMR-002

20190630-B12C 20 mg white solid  $[\text{Et}_3\text{NH}]_2[\text{B}_{12}\text{H}_{11}\text{NHCOCamphanic}]$  dissolved in 0.6 mL acetone- $d_6$   
 $^{11}\text{B}$  NMR 128 MHz

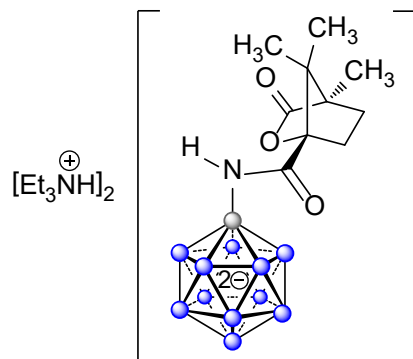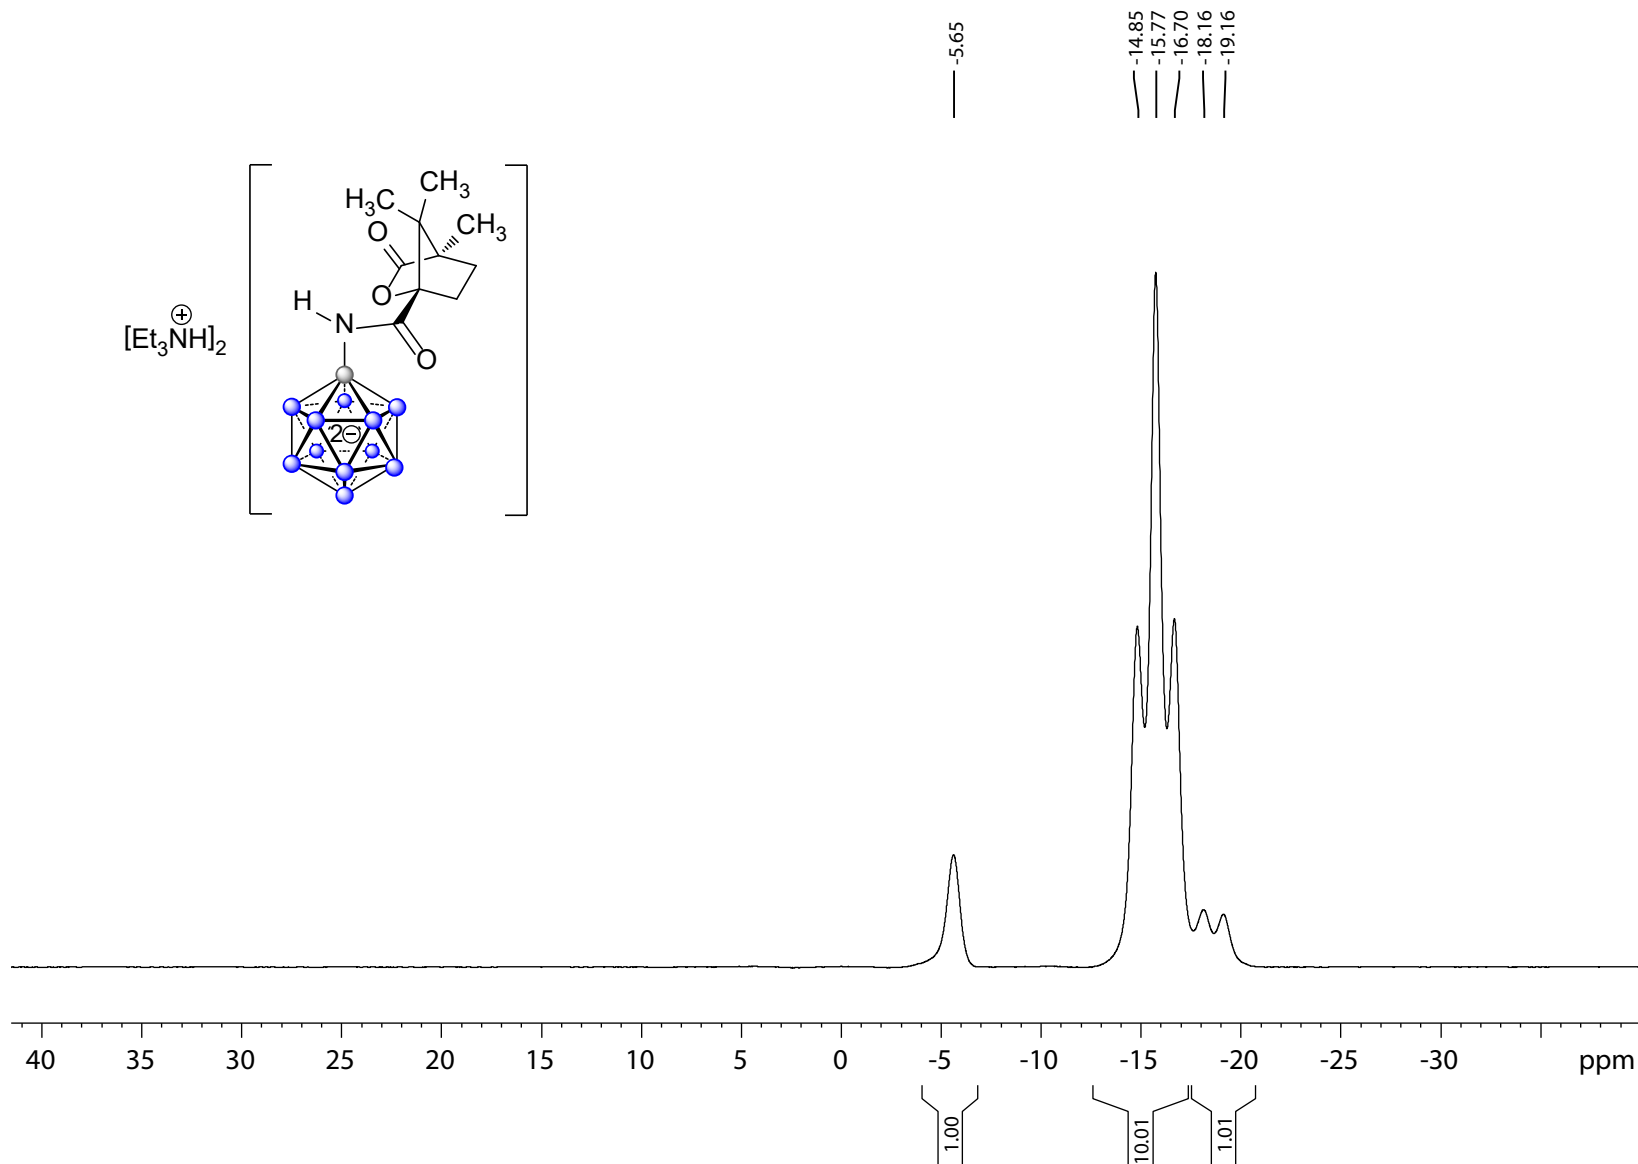

Current Data Parameters  
 NAME 20190630-RV-B12C  
 EXPNO 3  
 PROCNO 1

F2 - Acquisition Parameters  
 Date\_ 20190701  
 Time\_ 9.29  
 INSTRUM spect  
 PROBHD 5 mm PABBO BB/  
 PULPROG zg  
 TD 65536  
 SOLVENT Acetone  
 NS 128  
 DS 4  
 SWH 25510.203 Hz  
 FIDRES 0.389255 Hz  
 AQ 1.2845056 sec  
 RG 193.34  
 DW 19.600 usec  
 DE 6.50 usec  
 TE 296.3 K  
 D1 1.00000000 sec  
 TDO 1

===== CHANNEL f1 =====  
 NUC1 11B  
 P1 9.93 usec  
 PLW1 52.96599960 W  
 SFO1 128.3776052 MHz

F2 - Processing parameters  
 SI 32768  
 SF 128.3776050 MHz  
 WDW EM  
 SSB 0  
 LB 10.00 Hz  
 GB 0  
 PC 1.40

NMR-003

20190630-B12C 20 mg white solid  $[\text{Et}_3\text{NH}]_2[\text{B}_{12}\text{H}_{11}\text{NHCOCamphanic}]$  dissolved in 0.6 mL acetone- $d_6$

$^{11}\text{B}\{^1\text{H}\}$  NMR 128 MHz

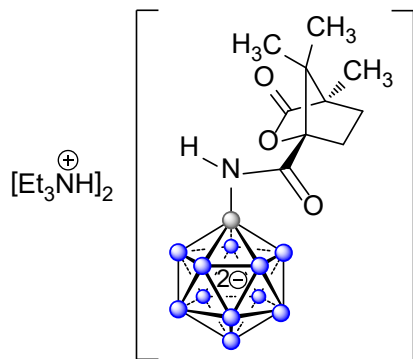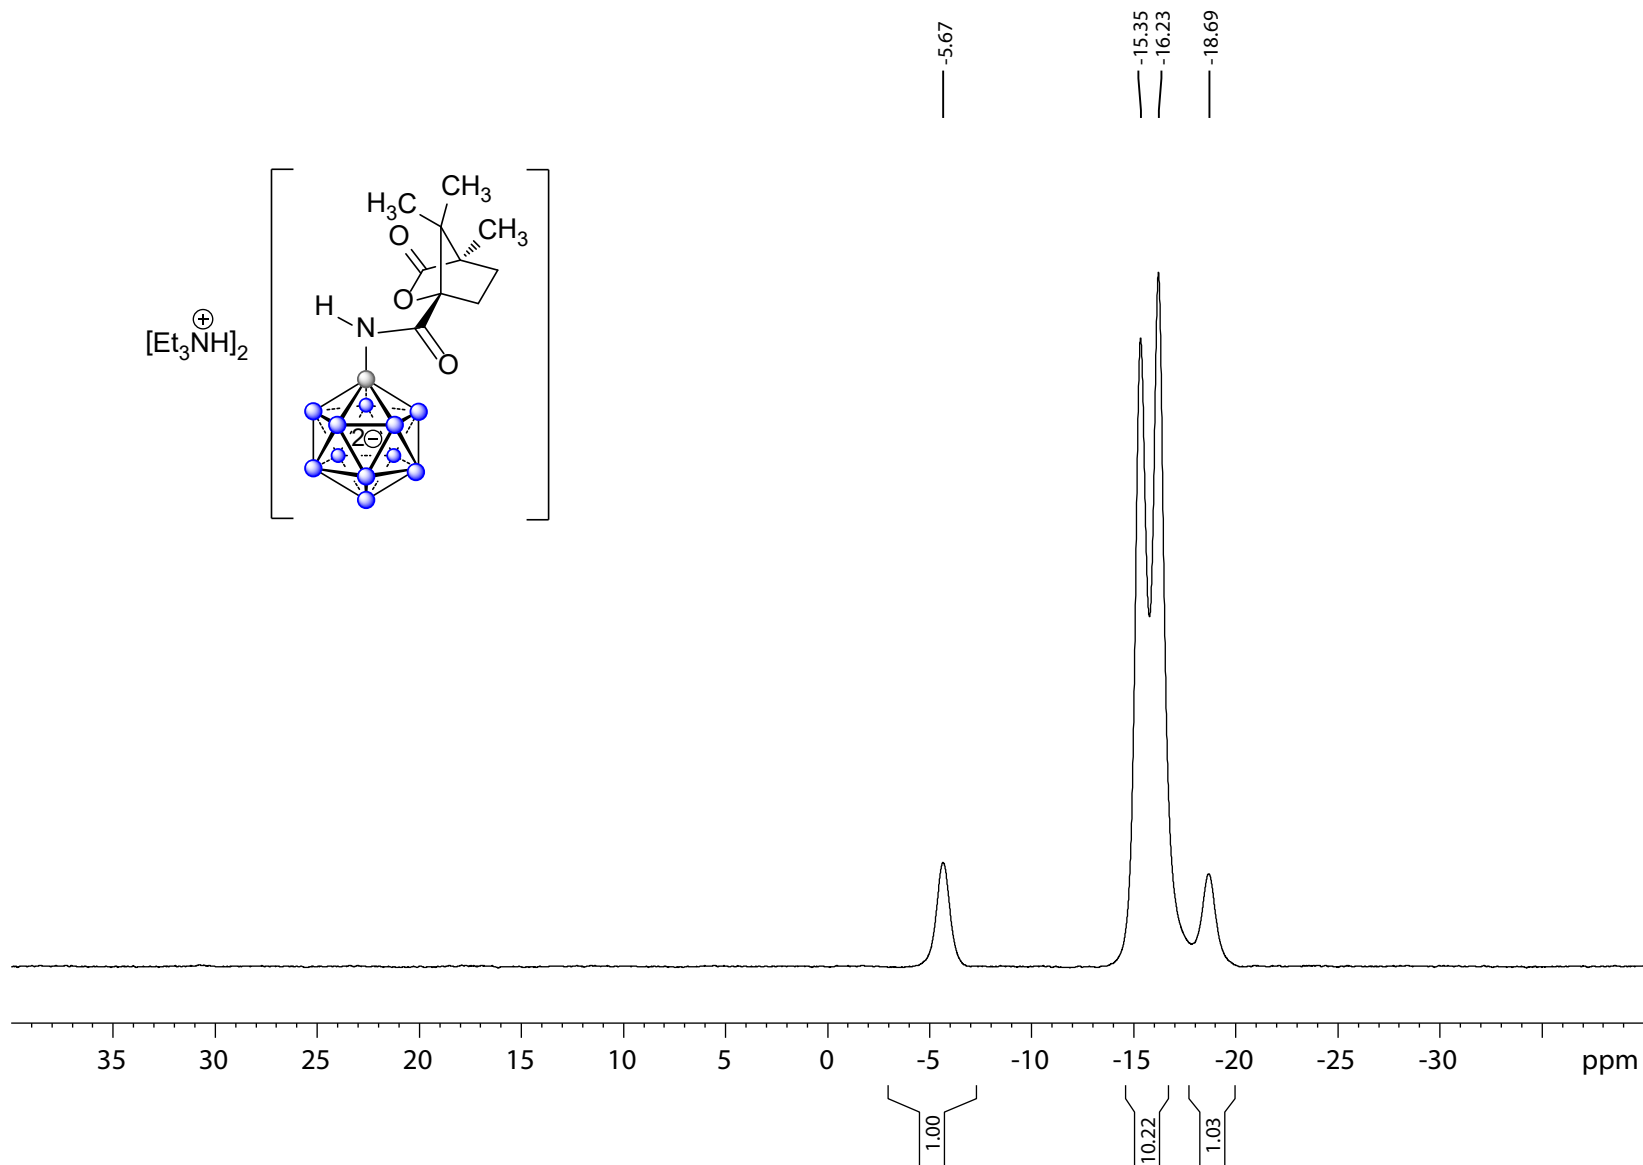

NMR-004

Current Data Parameters  
NAME 20190630-RV-B12C  
EXPNO 4  
PROCNO 1

F2 - Acquisition Parameters  
Date\_ 20190701  
Time\_ 9.35  
INSTRUM spect  
PROBHD 5 mm PABBO BB/  
PULPROG zgpg30  
TD 65536  
SOLVENT Acetone  
NS 128  
DS 4  
SWH 25510.203 Hz  
FIDRES 0.389255 Hz  
AQ 1.2845056 sec  
RG 193.34  
DW 19.600 usec  
DE 6.50 usec  
TE 296.8 K  
D1 1.0000000 sec  
D11 0.0300000 sec  
TD0 1

==== CHANNEL f1 =====  
NUC1 11B  
P1 9.93 usec  
PLW1 52.96599960 W  
SFO1 128.3776050 MHz

==== CHANNEL f2 =====  
CPDPRG[2] waltz16  
NUC2 1H  
PCPD2 80.00 usec  
PLW2 12.50000000 W  
PLW12 0.43945000 W  
PLW13 0.28125000 W  
SFO2 400.1320007 MHz

F2 - Processing parameters  
SI 32768  
SF 128.3776050 MHz  
WDW EM  
SSB 0  
LB 10.00 Hz  
GB 0  
PC 1.40

20190630-B12C 20 mg white solid  $[\text{Et}_3\text{NH}]_2[\text{B}_{12}\text{H}_{11}\text{NHCOCamphanic}]$  dissolved in 0.6 mL acetone- $d_6^*$

$^{13}\text{C}\{^1\text{H}\}$  NMR 100 MHz

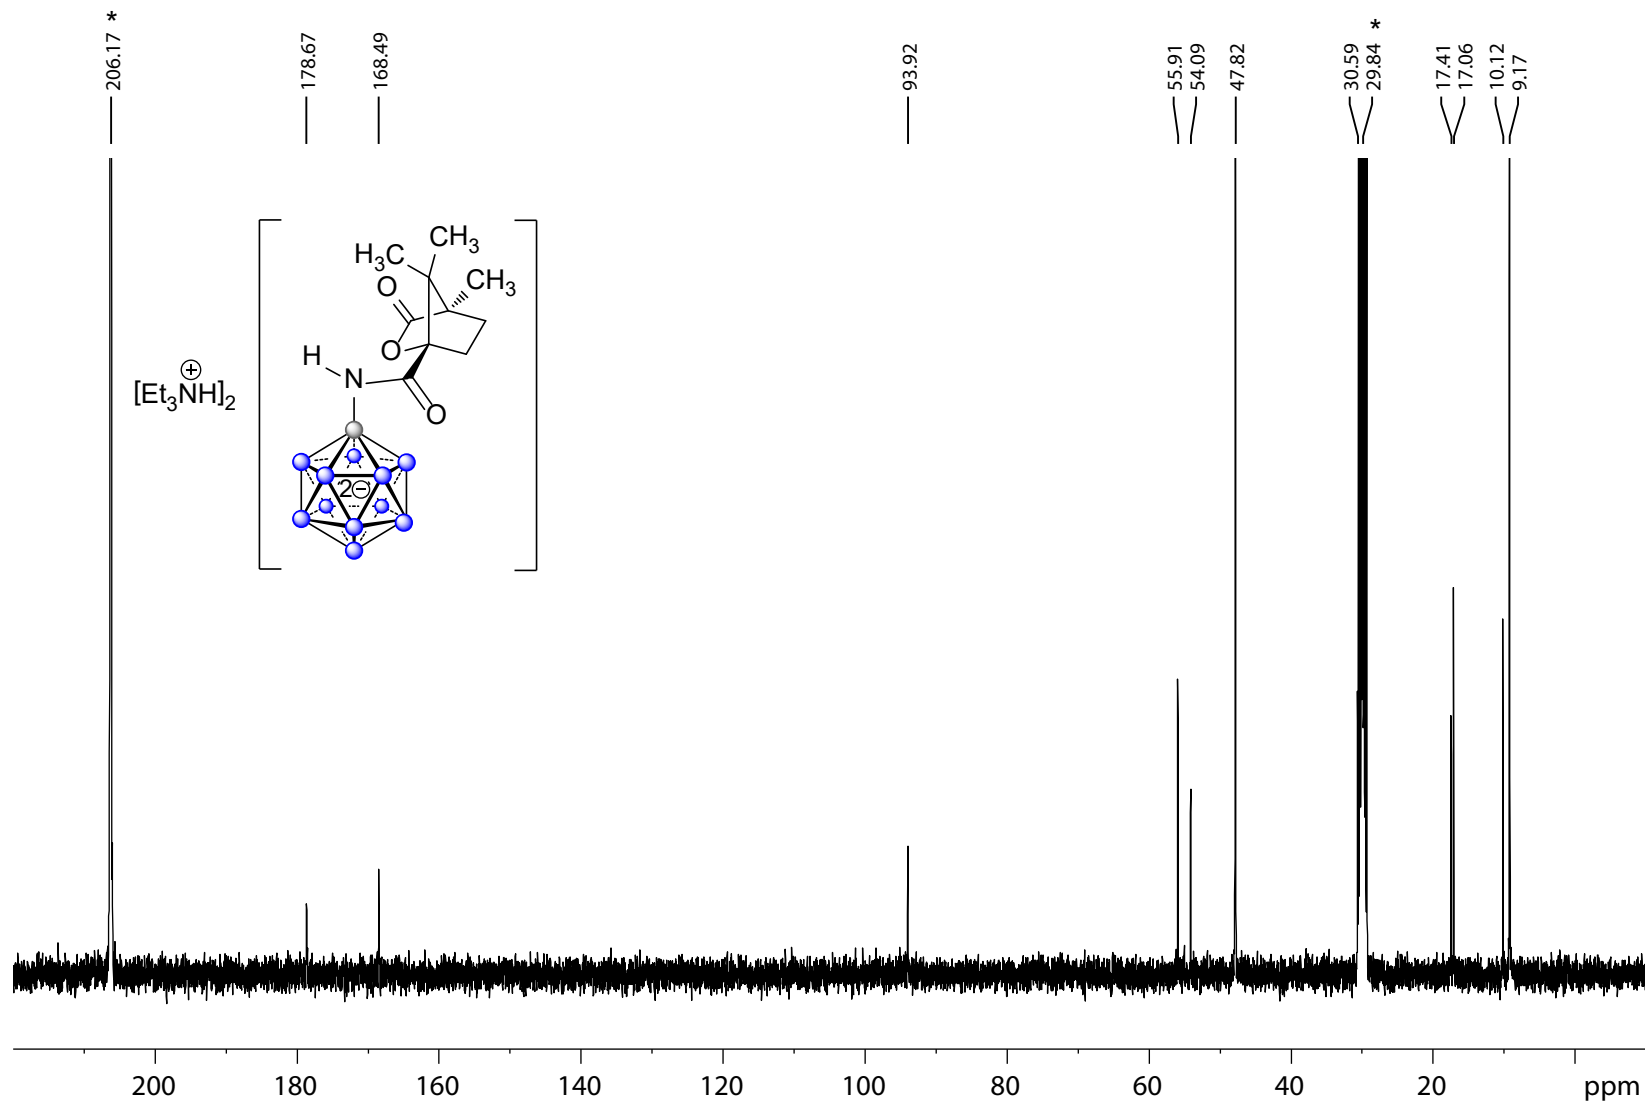

Current Data Parameters  
NAME 20190630-RV-B12C  
EXPNO 5  
PROCNO 1

F2 - Acquisition Parameters  
Date\_ 20190701  
Time\_ 11.08  
INSTRUM spect  
PROBHD 5 mm PABBO BB/  
PULPROG zgpg30  
TD 65536  
SOLVENT Acetone  
NS 2048  
DS 4  
SWH 29761.904 Hz  
FIDRES 0.454131 Hz  
AQ 1.1010048 sec  
RG 193.34  
DW 16.800 usec  
DE 6.50 usec  
TE 297.0 K  
D1 1.50000000 sec  
D11 0.03000000 sec  
TD0 1

==== CHANNEL f1 =====  
NUC1 13C  
P1 10.00 usec  
PLW1 53.00000000 W  
SFO1 100.6228293 MHz

==== CHANNEL f2 =====  
CPDPRG[2] waltz16  
NUC2 1H  
PCPD2 80.00 usec  
PLW2 12.50000000 W  
PLW12 0.43945000 W  
PLW13 0.28125000 W  
SFO2 400.1316005 MHz

F2 - Processing parameters  
SI 32768  
SF 100.6126798 MHz  
WDW EM  
SSB 0  
LB 1.00 Hz  
GB 0  
PC 1.40

20190630-B12C 20 mg white solid [Et<sub>3</sub>NH]<sup>+</sup><sub>2</sub>[B<sub>12</sub>H<sub>11</sub>NHCOCamphanic] dissolved in 0.6 mL acetone-d<sub>6</sub>

<sup>13</sup>CDEPT NMR 100 MHz

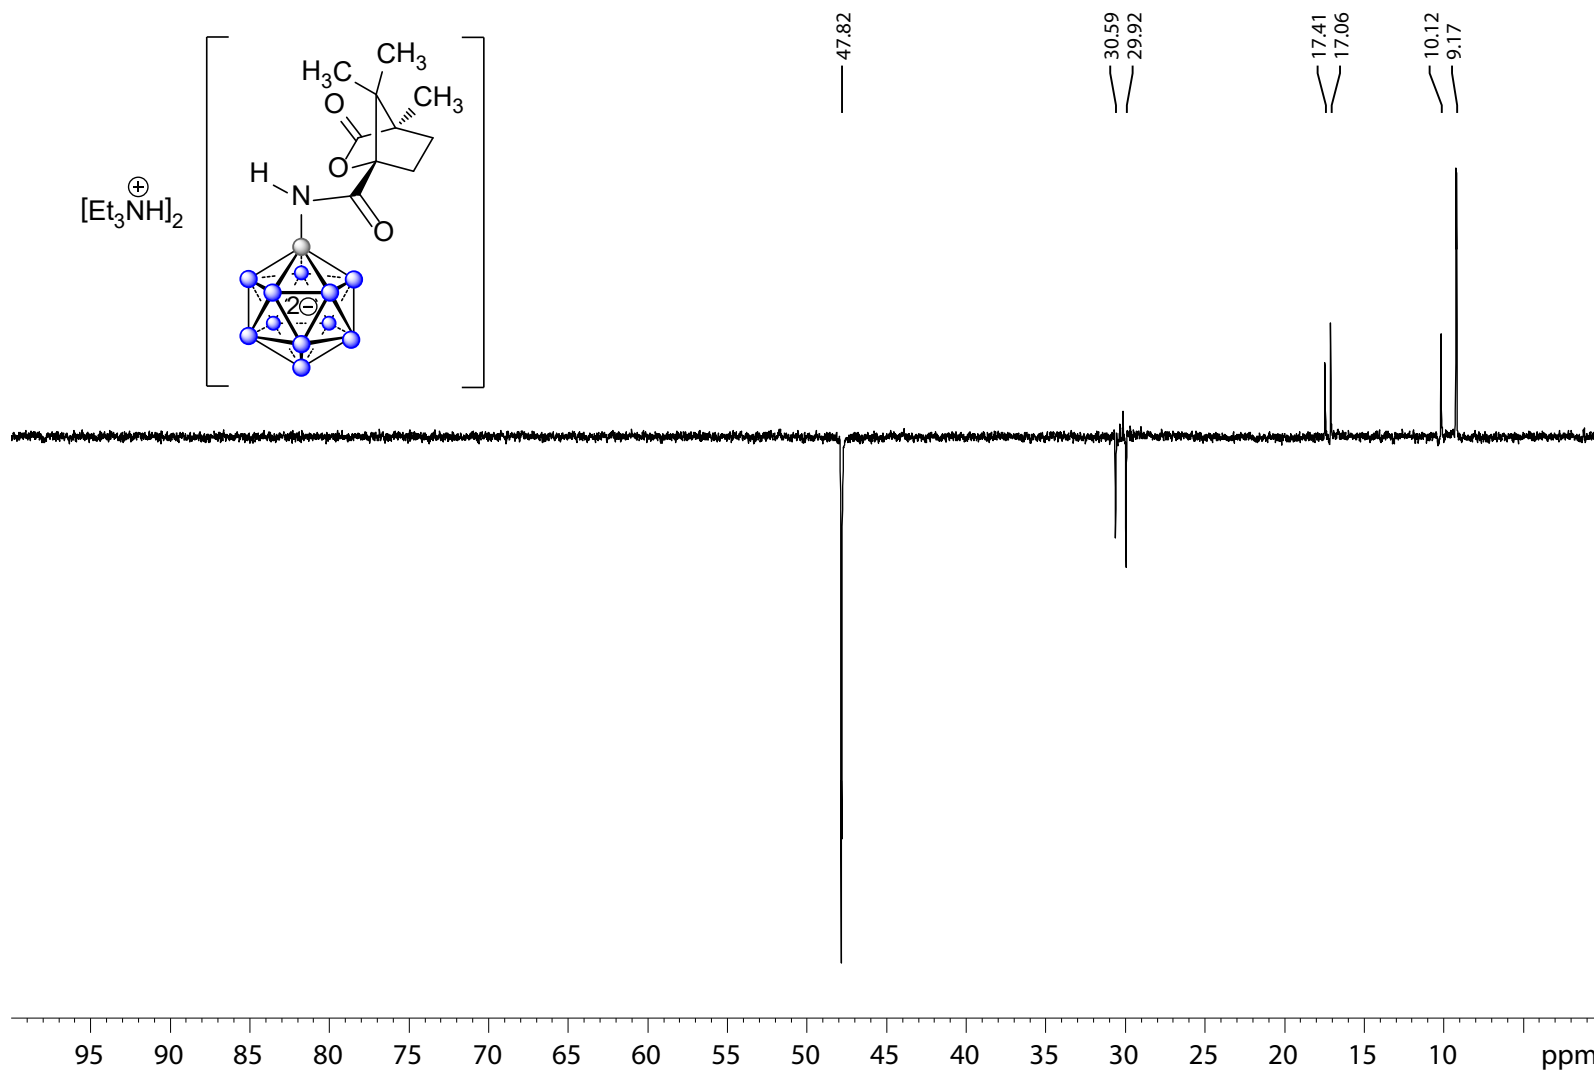

Current Data Parameters  
NAME 20190630-RV-B12C  
EXPNO 6  
PROCNO 1

F2 - Acquisition Parameters  
Date\_ 20190701  
Time 12.03  
INSTRUM spect  
PROBHD 5 mm PABBO BB/  
PULPROG dept135  
TD 65536  
SOLVENT Acetone  
NS 1024  
DS 4  
SWH 29296.875 Hz  
FIDRES 0.447035 Hz  
AQ 1.1184810 sec  
RG 193.34  
DW 17.067 usec  
DE 6.50 usec  
TE 296.4 K  
CNST2 145.0000000  
D1 2.00000000 sec  
D2 0.00344828 sec  
D12 0.00002000 sec  
TD0 1

=====  
CHANNEL f1  
NUC1 13C  
P1 10.00 usec  
P2 20.00 usec  
PLW1 53.00000000 W  
SFO1 100.6228293 MHz

=====  
CHANNEL f2  
CPDPRG[2] waltz16  
NUC2 1H  
P3 15.00 usec  
P4 30.00 usec  
PCPD2 80.00 usec  
PLW2 12.50000000 W  
PLW12 0.43945000 W  
SFO2 400.1316005 MHz

F2 - Processing parameters  
SI 32768  
SF 100.6126795 MHz  
WDW EM  
SSB 0  
LB 1.00 Hz  
GB 0  
PC 4.00



20190630-B12C 20 mg white solid  $[\text{Et}_3\text{NH}]_2[\text{B}_{12}\text{H}_{11}\text{NHCOCamphanic}]$  dissolved in 0.6 mL acetone- $d_6$   
 $^1\text{H} - ^1\text{H}$  COSY NMR

$[\text{Et}_3\text{NH}]_2^+$

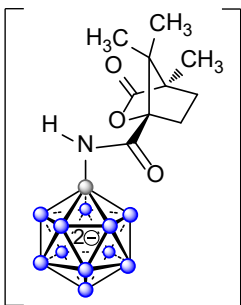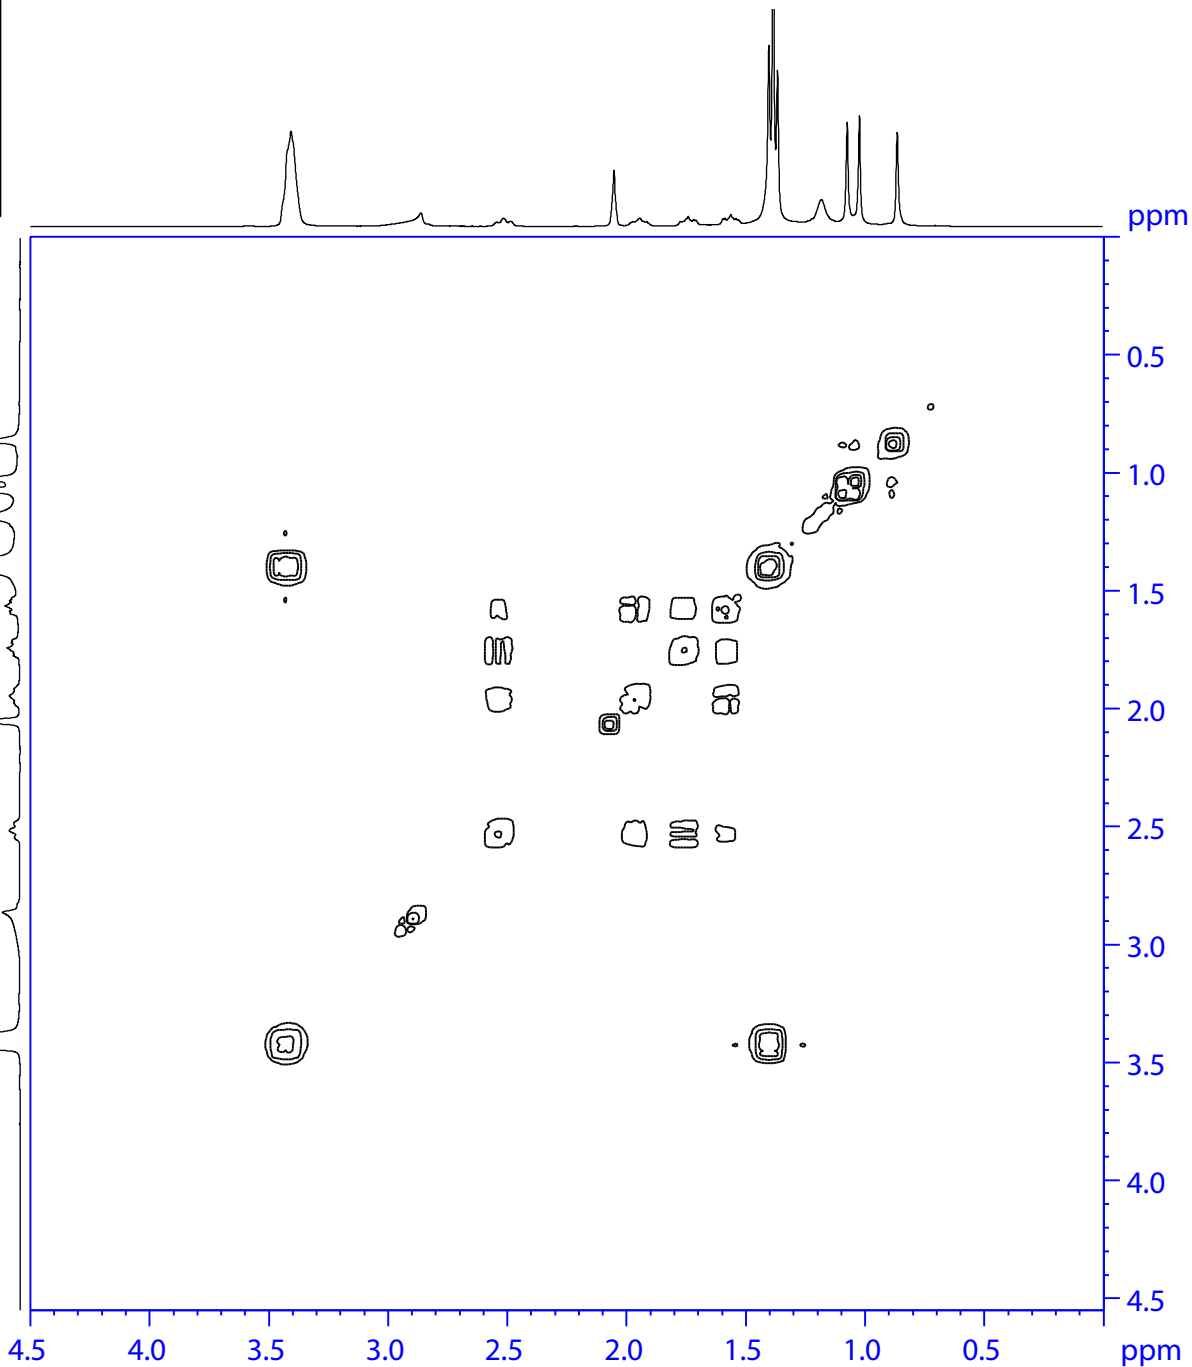

NMR-007

Current Data Parameters  
NAME 20190630-RV-B12C  
EXPNO 8  
PROCNO 1

F2 - Acquisition Parameters  
Date\_ 20190701  
Time\_ 12.19  
INSTRUM spect  
PROBHD 5 mm PABBO BB/  
PULPROG cosygpppqf  
TD 2048  
SOLVENT Acetone  
NS 2  
DS 8  
SWH 5341.880 Hz  
FIDRES 2.608340 Hz  
AQ 0.1916928 sec  
RG 170.36  
DW 93.600 usec  
DE 6.50 usec  
TE 296.1 K  
D0 0.0000300 sec  
D1 2.0000000 sec  
D11 0.03000000 sec  
D12 0.00002000 sec  
D13 0.00000400 sec  
D16 0.00020000 sec  
INO 0.00018720 sec

==== CHANNEL f1 =====  
NUC1 1H  
P0 15.00 usec  
P1 15.00 usec  
P17 2500.00 usec  
PLW1 12.5000000 W  
PLW10 4.16050005 W  
SF01 400.1324057 MHz

===== GRADIENT CHANNEL =====  
GPNAM[1] SMSQ10.100  
GPZ1 10.00 %  
P16 1000.00 usec

F1 - Acquisition parameters  
TD 128  
SF01 400.1324 MHz  
FIDRES 83.466881 Hz  
SW 13.350 ppm  
FnMODE QF

F2 - Processing parameters  
SI 1024  
SF 400.1300000 MHz  
WDW QSINE  
SSB 0  
LB 0 Hz  
GB 0  
PC 1.40

F1 - Processing parameters  
SI 1024  
MC2 QF  
SF 400.1300000 MHz  
WDW QSINE  
SSB 0  
LB 0 Hz  
GB 0

20190630-B12C 20 mg white solid [Et<sub>3</sub>NH]<sub>2</sub>[B<sub>12</sub>H<sub>11</sub>NHCOCamphanic] dissolved in 0.6 mL acetone-d<sub>6</sub>

<sup>1</sup>H - <sup>13</sup>C HSQC NMR

[Et<sub>3</sub>NH]<sup>+</sup><sub>2</sub>

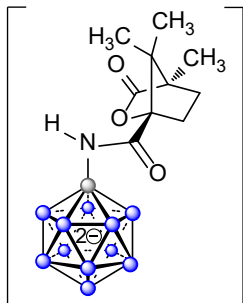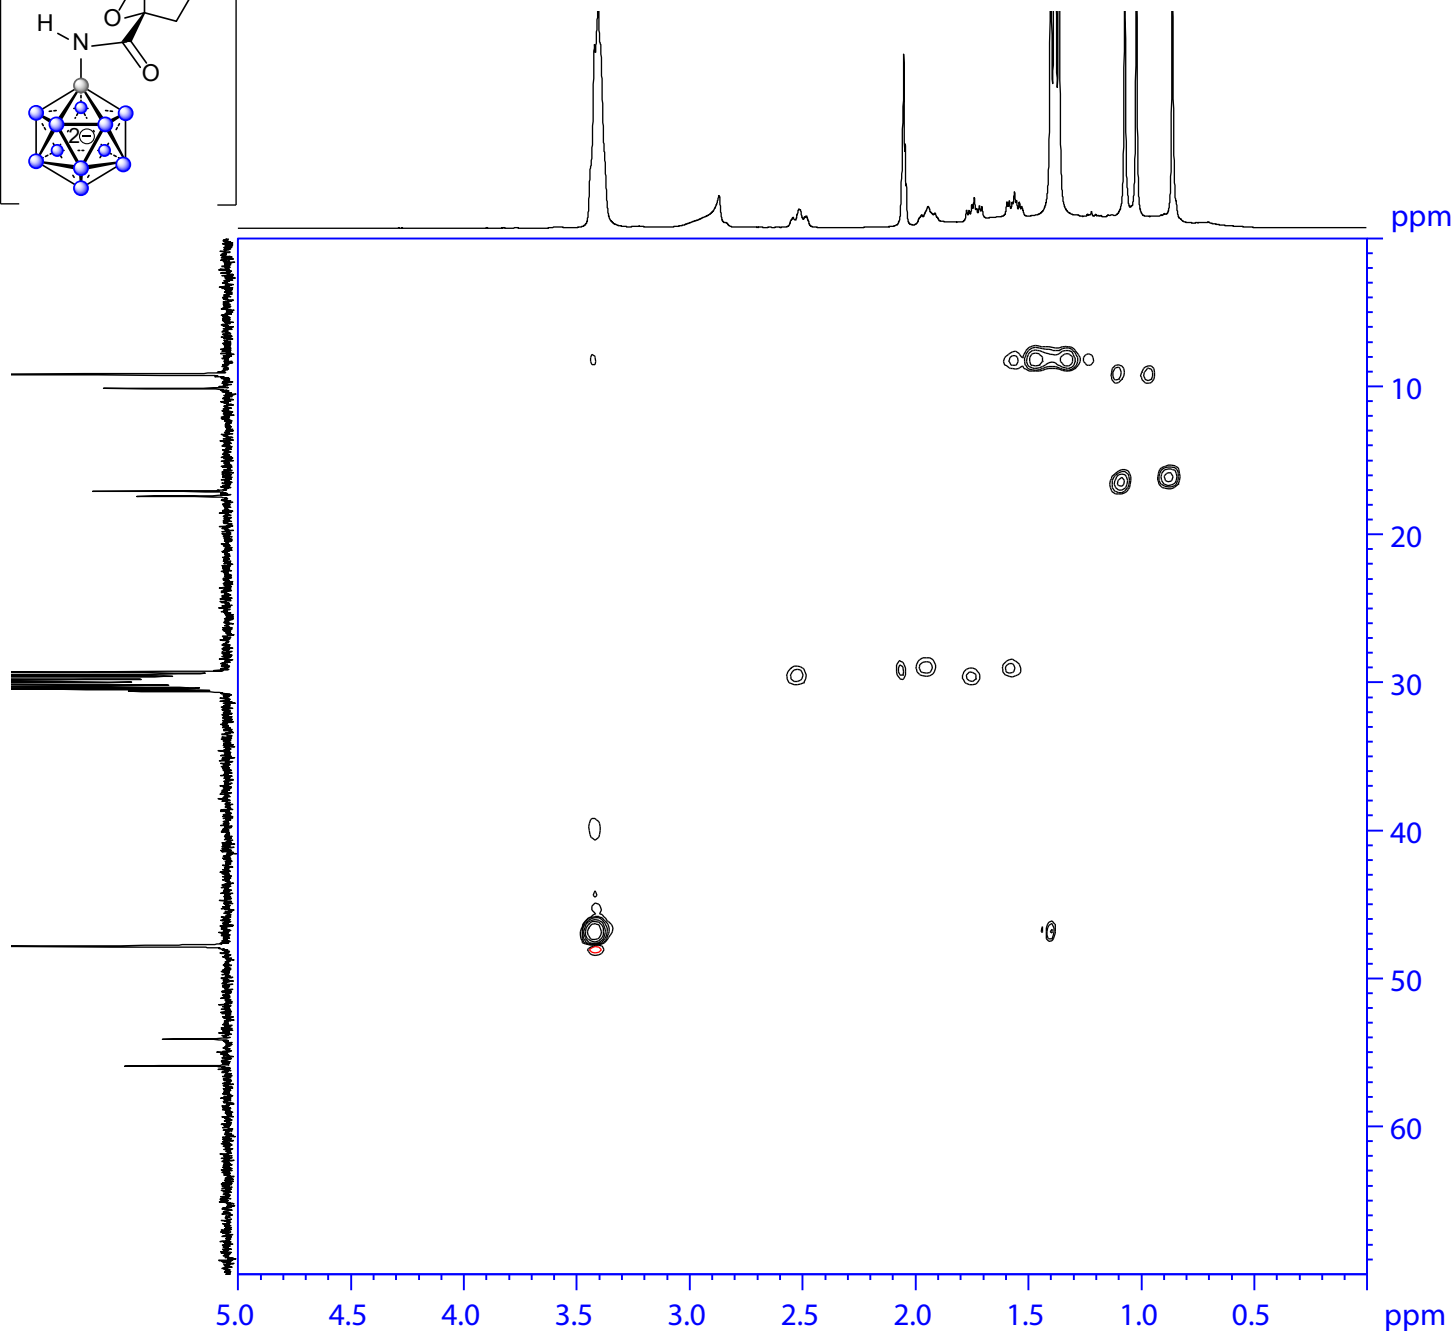

```
Current Data Parameters
NAME      20190630-RV-B12C
EXPNO     7
PROCNO    1

F2 - Acquisition Parameters
Date_     20190701
Time      12.04
INSTRUM   spect
PROBHD    5 mm PABBO BB/
PULPROG   hsqcetgps12
TD         1024
SOLVENT   Acetone
NS         2
DS         2
SWH        6009.615 Hz
FIDRES     5.868765 Hz
AQ         0.0851968 sec
RG         193.34
DW         83.200 usec
DE         6.50 usec
TE         296.3 K
CNST2     145.0000000
DO         0.00000300 sec
D1         1.50000000 sec
D4         0.00172414 sec
D11        0.03000000 sec
D16        0.00020000 sec
D24        0.00086207 sec
IN0        0.00001990 sec
ZGPTNS

===== CHANNEL f1 =====
NUC1       1H
P1         15.00 usec
P2         30.00 usec
P28        1000.00 usec
PLW1       12.50000000 W
SFO1       400.1328009 MHz

===== CHANNEL f2 =====
CPDPRG[2]  garp
NUC2       13C
P3         10.00 usec
P4         20.00 usec
PCPD2      70.00 usec
PLW2       53.00000000 W
PLW12      1.08159995 W
SFO2       100.6238364 MHz

===== GRADIENT CHANNEL =====
GPNAM[1]   SMSQ10.100
GPNAM[2]   SMSQ10.100
GPNAM[3]   SMSQ10.100
GPNAM[4]   SMSQ10.100
GPZ1       80.00 %
GPZ2       20.10 %
GPZ3       11.00 %
GPZ4       -5.00 %
PI6        1000.00 usec
PI9        600.00 usec

F1 - Acquisition parameters
TD         256
SFO1       100.6238 MHz
FIDRES     196.524048 Hz
SW         249.991 ppm
FMODE      Echo-Antiecho

F2 - Processing parameters
SI         1024
SF         400.130000 MHz
WDW        QSINE
SSB        2
LB         0 Hz
GB         0
PC         1.40

F1 - Processing parameters
SI         1024
MC2        echo-antiecho
SF         100.6127690 MHz
WDW        QSINE
SSB        2
LB         0 Hz
GB         0
```

20182117-B12M-Menthyl 10 mg white solid  $[\text{Et}_3\text{NH}]_2[\text{B}_{12}\text{H}_{11}\text{NHCO}(\text{Menthyl})]$  dissolved in 0.6 mL acetone- $d_6^*$

400MHz  $^1\text{H}$  NMR, o deuterated solvent residual peak= 2.05 ppm;  $\diamond$  water peak

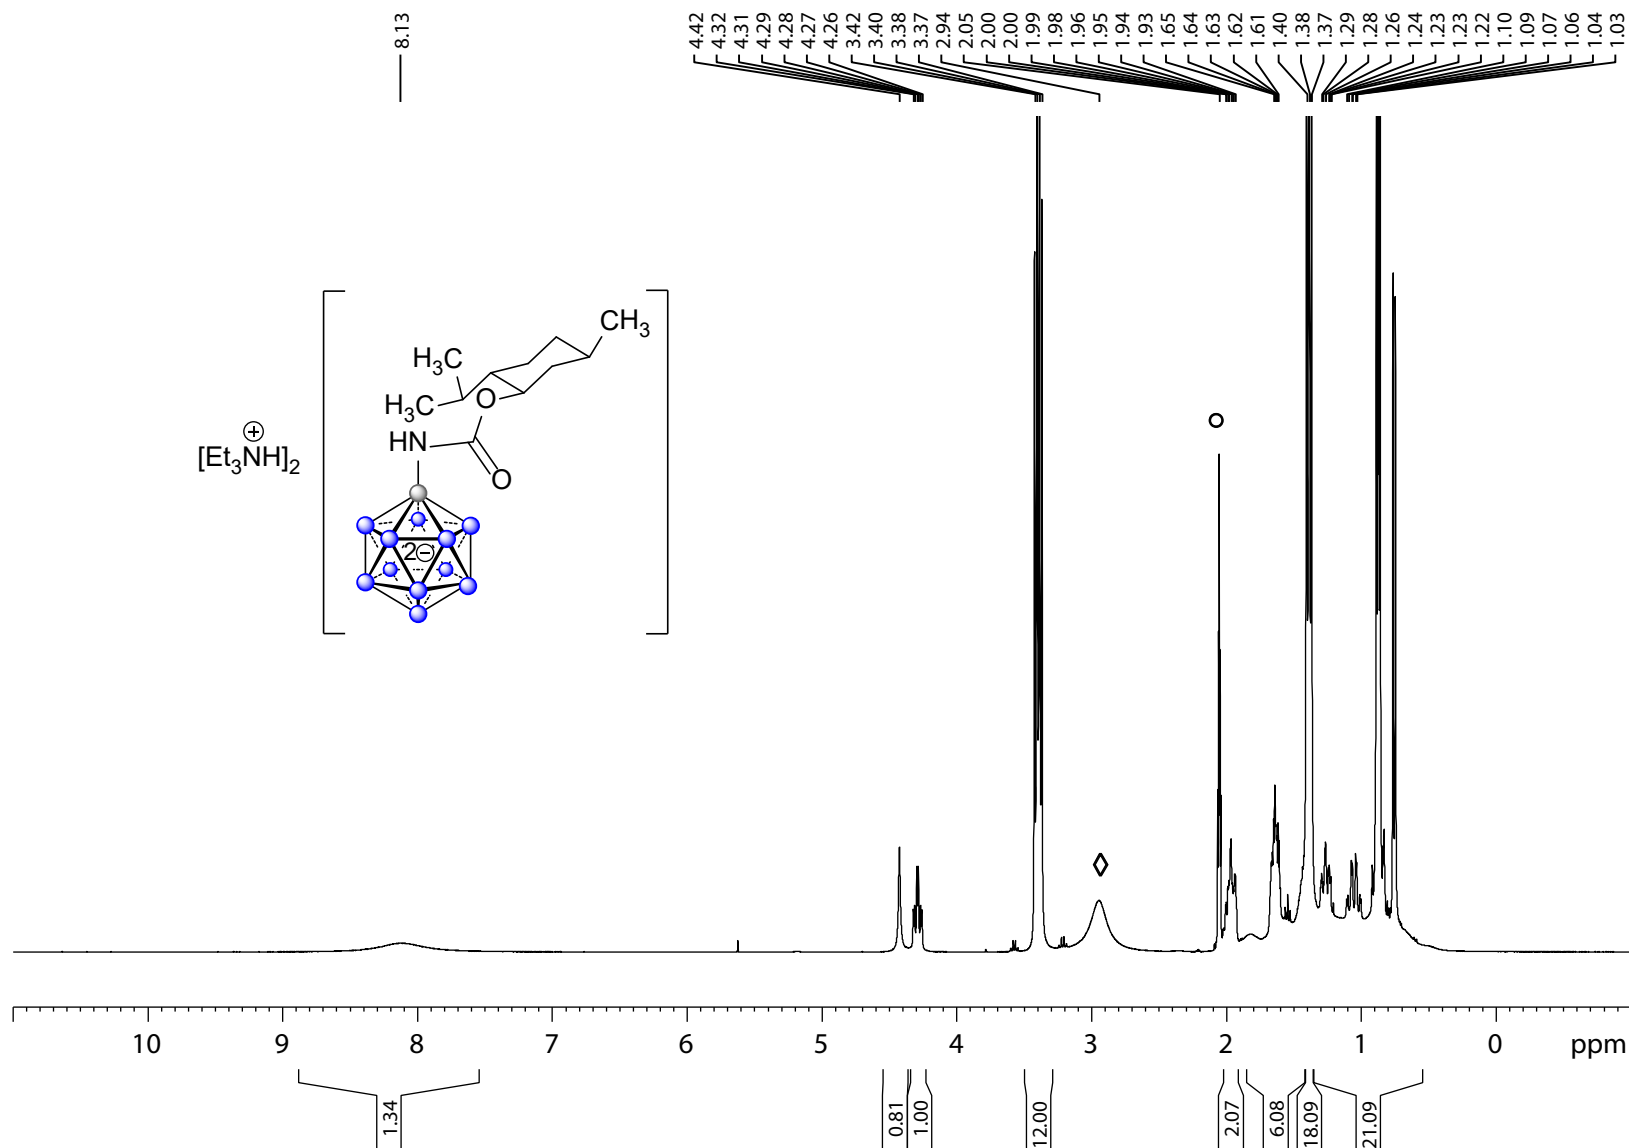

Current Data Parameters  
 NAME 20181217-RV-B12-MENTHYL-II  
 EXPNO 1  
 PROCNO 1

F2 - Acquisition Parameters  
 Date\_ 20181219  
 Time\_ 5.42  
 INSTRUM spect  
 PROBHD 5 mm PABBO BB/  
 PULPROG zg30  
 TD 65536  
 SOLVENT Acetone  
 NS 16  
 DS 2  
 SWH 10000.000 Hz  
 FIDRES 0.152588 Hz  
 AQ 3.2767999 sec  
 RG 64.43  
 DW 50.000 usec  
 DE 6.50 usec  
 TE 296.0 K  
 D1 1.00000000 sec  
 TD0 1

===== CHANNEL f1 =====  
 NUC1 1H  
 P1 15.00 usec  
 PLW1 12.50000000 W  
 SFO1 400.1328009 MHz

F2 - Processing parameters  
 SI 65536  
 SF 400.1300072 MHz  
 WDW EM  
 SSB 0  
 LB 0.30 Hz  
 GB 0  
 PC 1.00

20182117-B12M-Menthyl 10 mg white solid  $[\text{Et}_3\text{NH}]_2[\text{B}_{12}\text{H}_{11}\text{NHC}(\text{Menthyl})]$  dissolved in 0.6 mL acetone- $d_6^*$

400MHz  $^1\text{H}\{\text{B}\}$  NMR,  $\circ$  deuterated solvent residual peak = 2.05 ppm;  $\diamond$  water peak

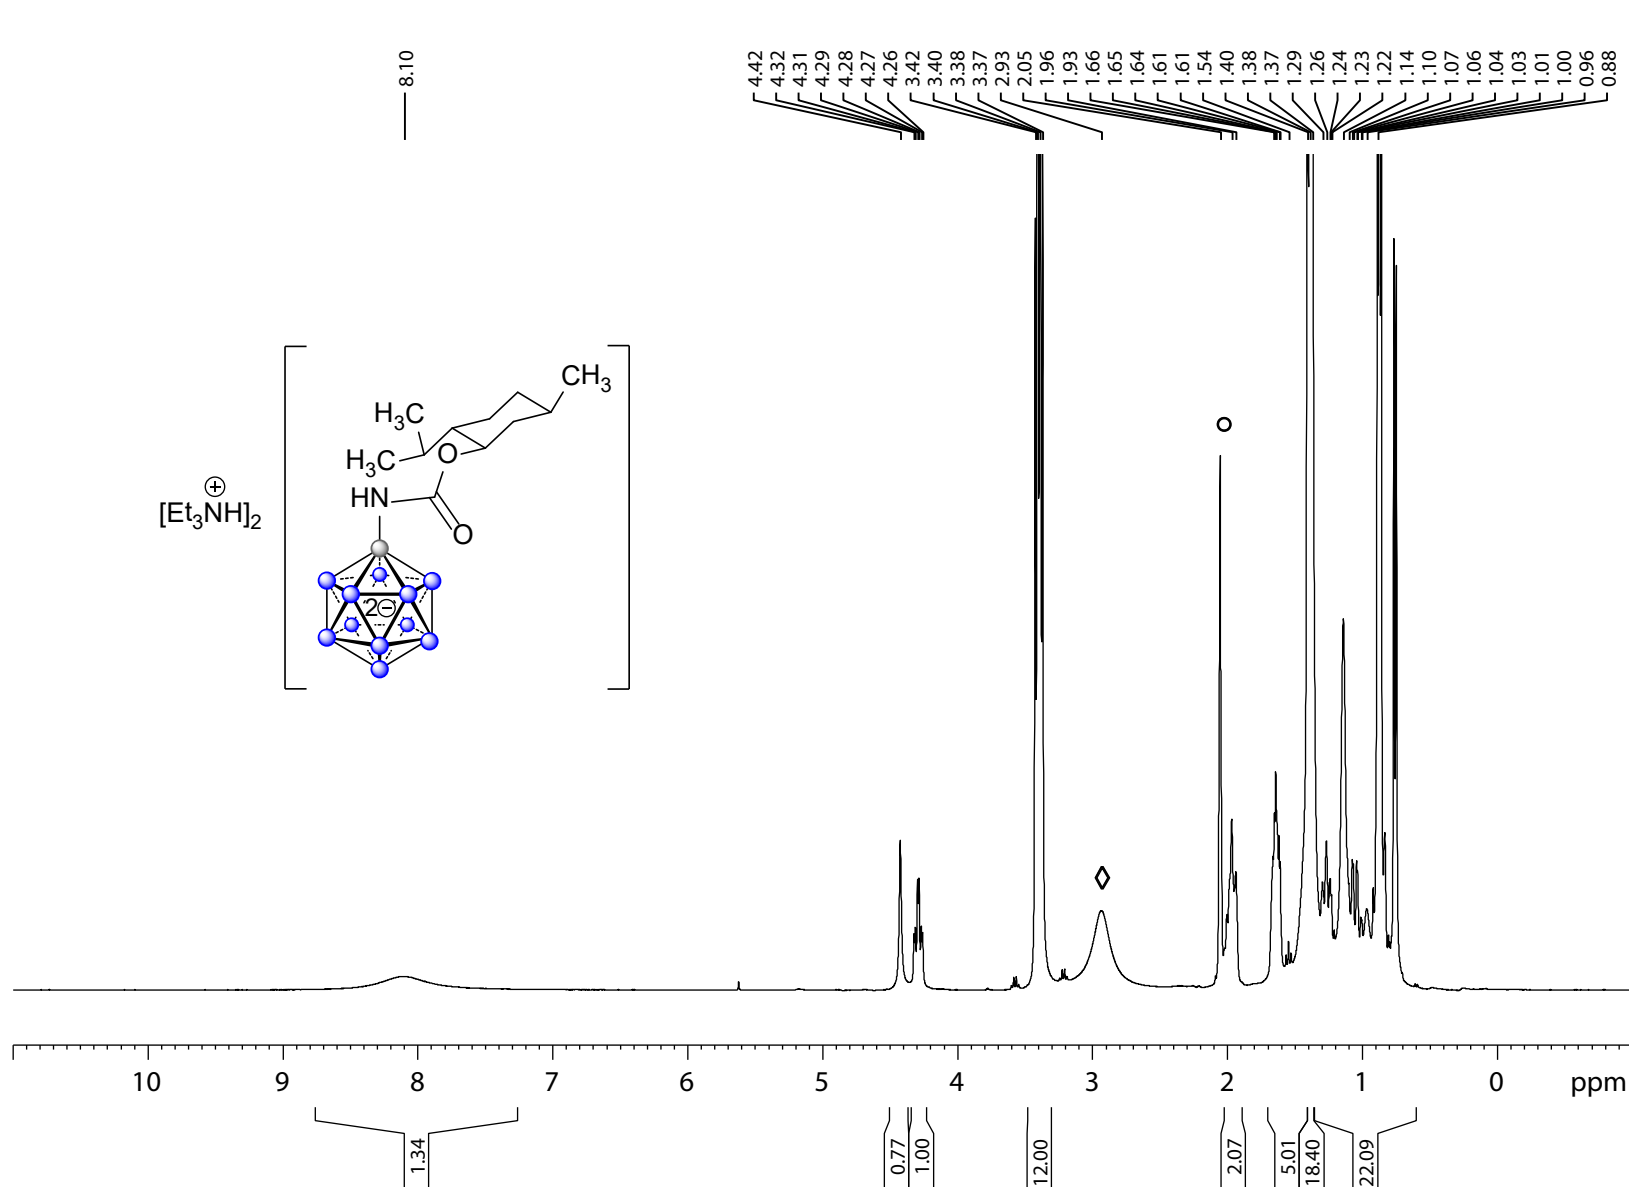

Current Data Parameters  
 NAME 20181217-RV-B12-MENTHYL-II  
 EXPNO 3  
 PROCNO 1

F2 - Acquisition Parameters  
 Date\_ 20181219  
 Time\_ 5.49  
 INSTRUM spect  
 PROBHD 5 mm PABBO BB/  
 PULPROG zgig30  
 TD 16384  
 SOLVENT Acetone  
 NS 16  
 DS 4  
 SWH 8012.820 Hz  
 FIDRES 0.489064 Hz  
 AQ 1.0223616 sec  
 RG 64.43  
 DW 62.400 usec  
 DE 6.50 usec  
 TE 296.2 K  
 D1 1.00000000 sec  
 D11 0.03000000 sec  
 TD0 1

===== CHANNEL f1 =====  
 NUC1  $^1\text{H}$   
 P1 15.00 usec  
 PLW1 12.50000000 W  
 SFO1 400.1320007 MHz

===== CHANNEL f2 =====  
 CPDPRG[2] garp4  
 NUC2  $^{11}\text{B}$   
 PCPD2 90.00 usec  
 PLW2 52.96599960 W  
 PLW12 0.64477998 W  
 SFO2 128.3776050 MHz

F2 - Processing parameters  
 SI 32768  
 SF 400.1300073 MHz  
 WDW EM  
 SSB 0  
 LB 1.00 Hz  
 GB 0  
 PC 1.40

20182117-B12M-Menthyl 10 mg white solid  $[\text{Et}_3\text{NH}]_2[\text{B}_{12}\text{H}_{11}\text{NHCO}(\text{Menthyl})]$  dissolved in 0.6 mL acetone- $d_6^*$

$^{11}\text{B}$  NMR 128 MHz

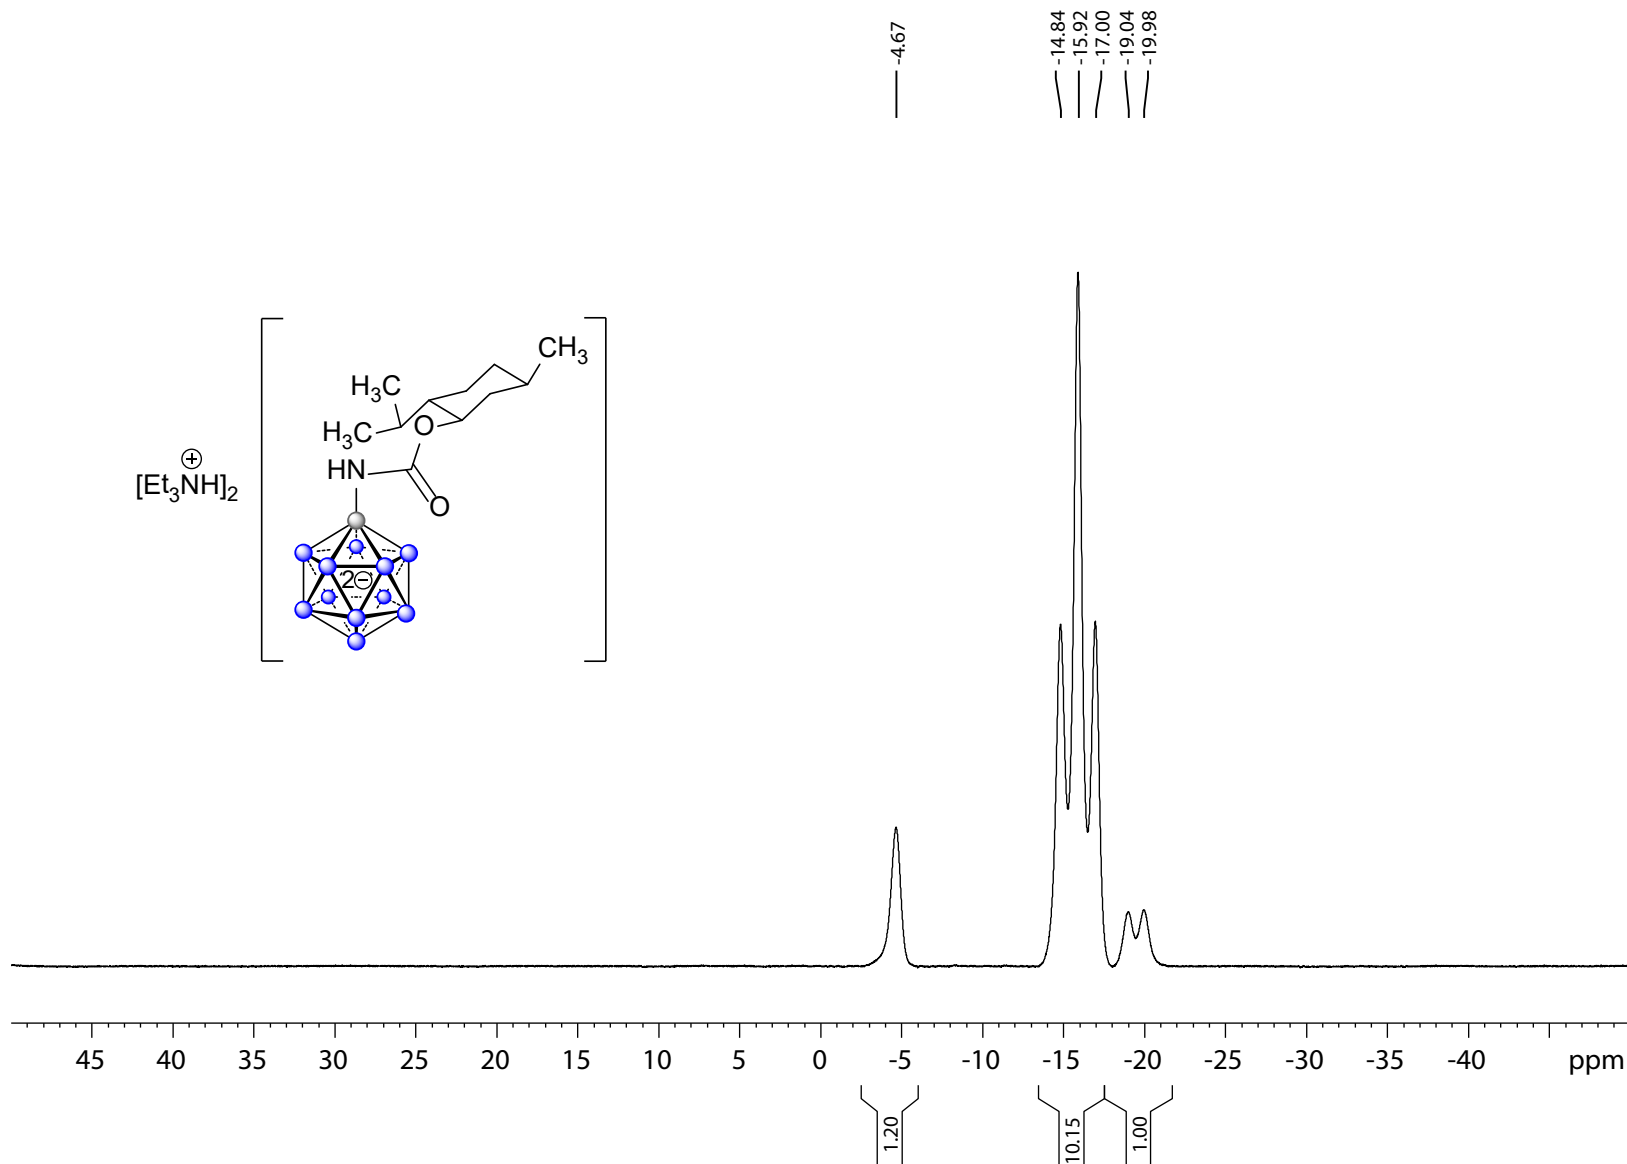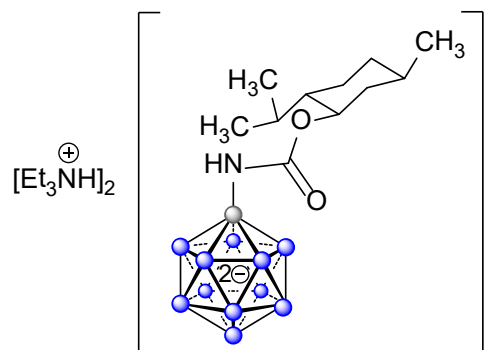

Current Data Parameters  
NAME 20181217-RV-B12-MENTHYL-II  
EXPNO 2  
PROCNO 1

F2 - Acquisition Parameters  
Date\_ 20181219  
Time\_ 5.47  
INSTRUM spect  
PROBHD 5 mm PABBO BB/  
PULPROG zg  
TD 65536  
SOLVENT Acetone  
NS 128  
DS 4  
SWH 25510.203 Hz  
FIDRES 0.389255 Hz  
AQ 1.2845056 sec  
RG 193.34  
DW 19.600 usec  
DE 6.50 usec  
TE 295.9 K  
D1 1.00000000 sec  
TD0 1

===== CHANNEL f1 =====  
NUC1 11B  
P1 9.93 usec  
PLW1 52.96599960 W  
SFO1 128.3776052 MHz

F2 - Processing parameters  
SI 32768  
SF 128.3776050 MHz  
WDW EM  
SSB 0  
LB 1.00 Hz  
GB 0  
PC 1.40

NMR-011

20182117-B12M-Menthyl 10 mg white solid [Et<sub>3</sub>NH]<sub>2</sub>[B<sub>12</sub>H<sub>11</sub>NHCO(Menthyl)] dissolved in 0.6 mL acetone-d<sub>6</sub>\*

<sup>11</sup>B{<sup>1</sup>H} NMR 128 MHz

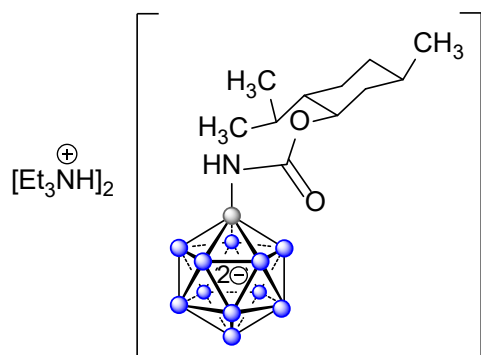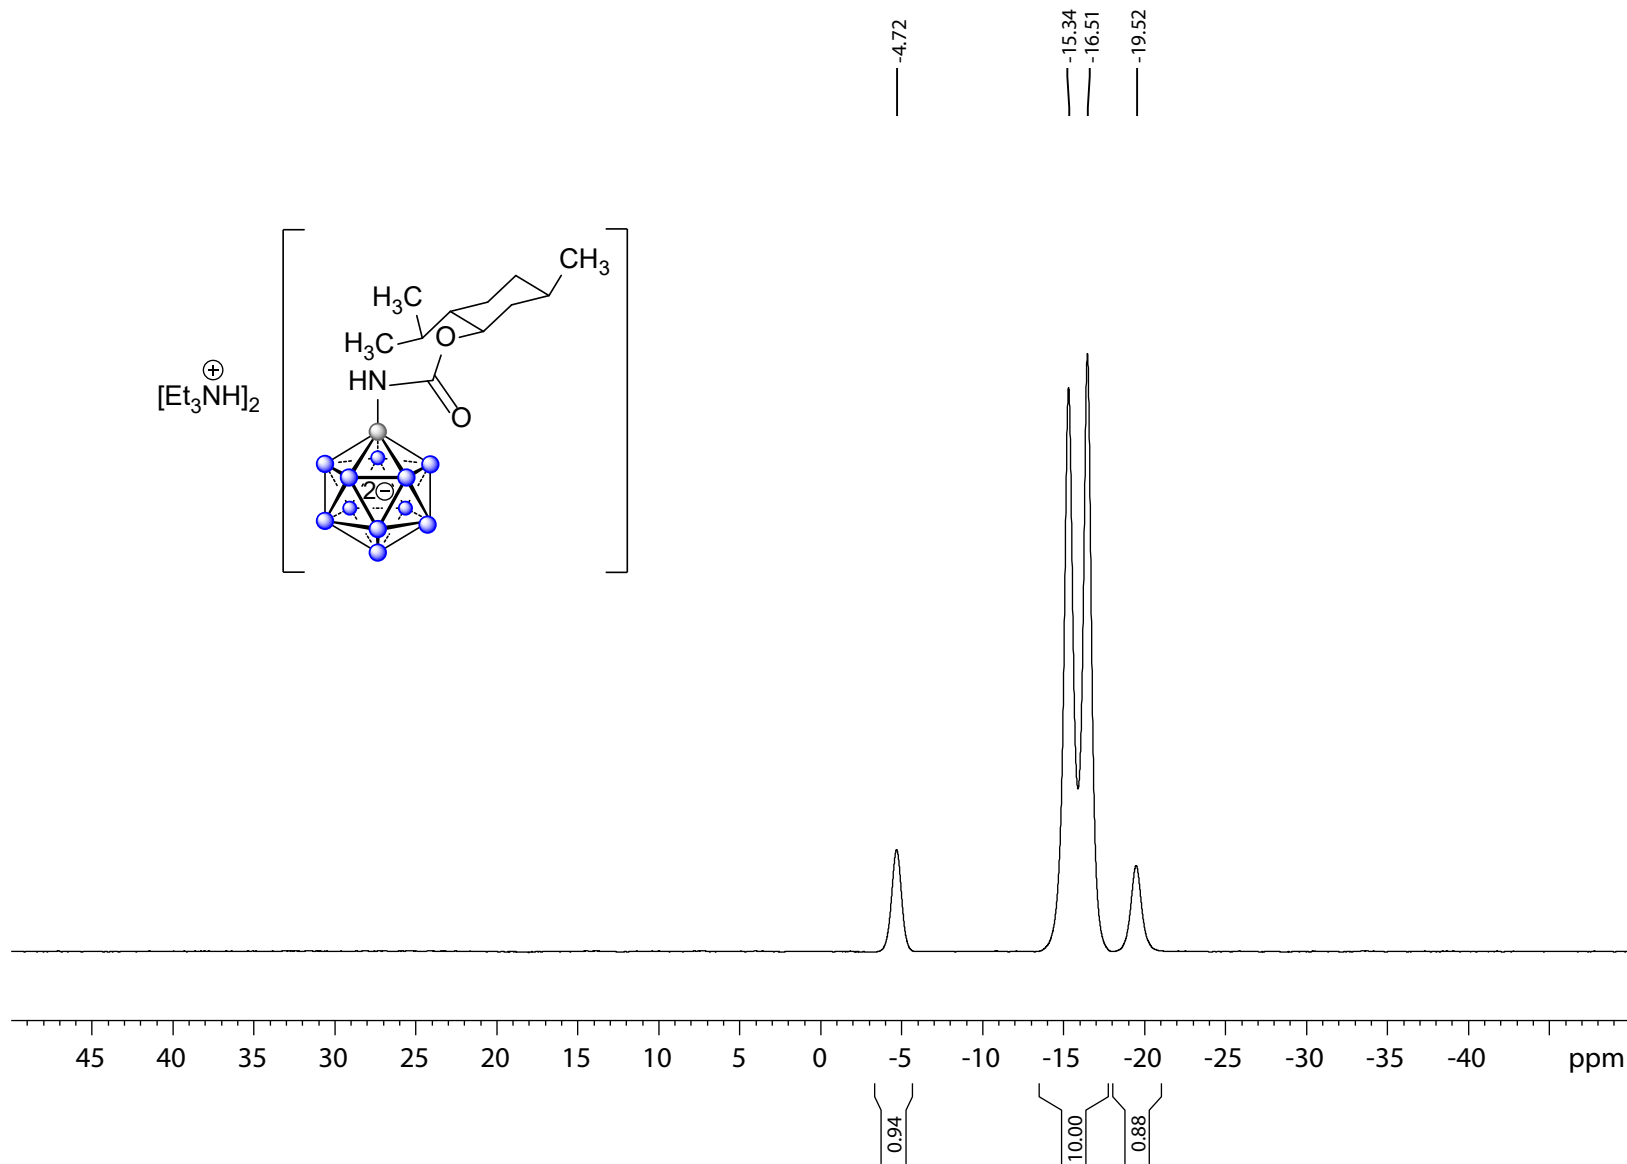

Current Data Parameters  
NAME 20181217-RV-B12-MENTHYL-II  
EXPNO 4  
PROCNO 1

F2 - Acquisition Parameters  
Date\_ 20181219  
Time 5.55  
INSTRUM spect  
PROBHD 5 mm PABBO BB/  
PULPROG zgpg30  
TD 65536  
SOLVENT Acetone  
NS 128  
DS 4  
SWH 25510.203 Hz  
FIDRES 0.389255 Hz  
AQ 1.2845056 sec  
RG 193.34  
DW 19.600 usec  
DE 6.50 usec  
TE 296.7 K  
D1 1.00000000 sec  
D11 0.03000000 sec  
TD0 1

==== CHANNEL f1 =====  
NUC1 11B  
P1 9.93 usec  
PLW1 52.96599960 W  
SFO1 128.3776050 MHz

==== CHANNEL f2 =====  
CPDPRG[2] waltz16  
NUC2 1H  
PCPD2 80.00 usec  
PLW2 12.50000000 W  
PLW12 0.43945000 W  
PLW13 0.28125000 W  
SFO2 400.1320007 MHz

F2 - Processing parameters  
SI 32768  
SF 128.3776050 MHz  
WDW EM  
SSB 0  
LB 10.00 Hz  
GB 0  
PC 1.40

20182117-B12M-Menthyl 10 mg white solid  $[\text{Et}_3\text{NH}]_2[\text{B}_{12}\text{H}_{11}\text{NHCO}(\text{Menthyl})]$  dissolved in 0.6 mL acetone- $d_6^*$

$^{13}\text{C}\{^1\text{H}\}$  NMR 100 MHz

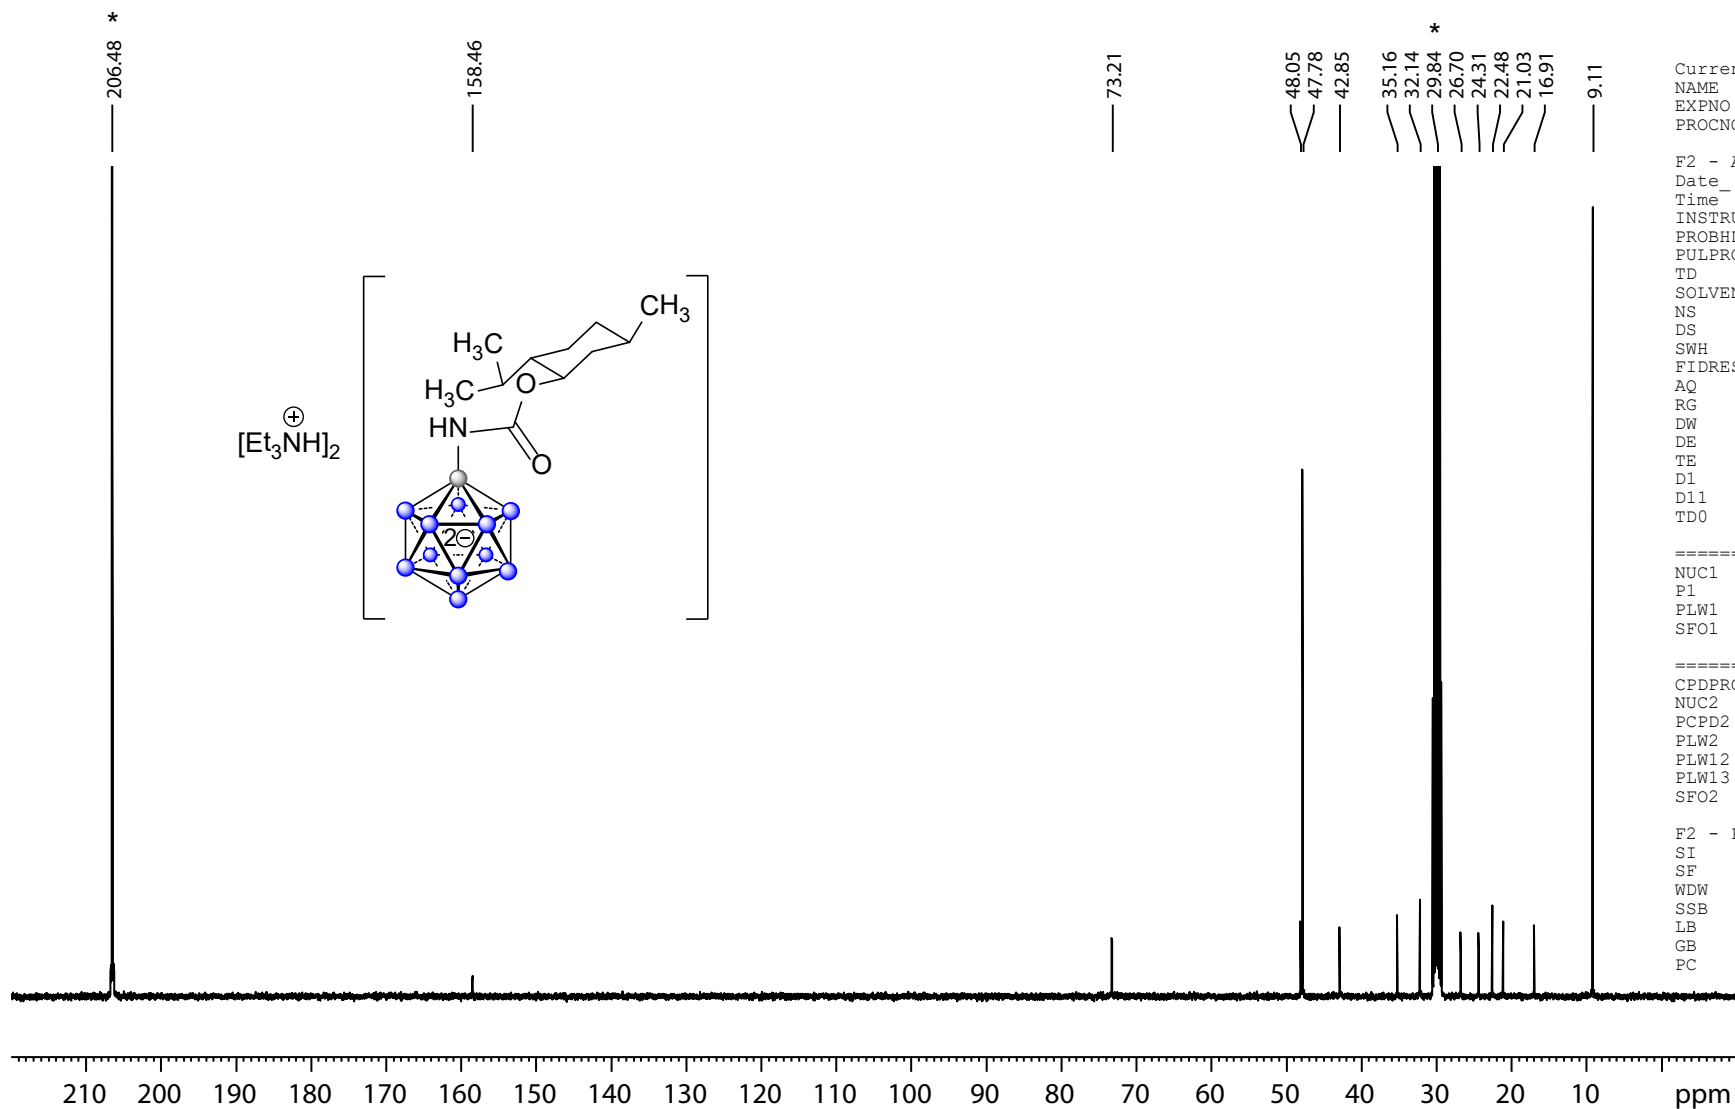

Current Data Parameters  
 NAME 20181214-RV-menthyl-IIC  
 EXPNO 1  
 PROCNO 1

F2 - Acquisition Parameters  
 Date\_ 20181216  
 Time 3.10  
 INSTRUM spect  
 PROBHD 5 mm PABBO BB/  
 PULPROG zgpg30  
 TD 65536  
 SOLVENT Acetone  
 NS 1024  
 DS 4  
 SWH 29761.904 Hz  
 FIDRES 0.454131 Hz  
 AQ 1.1010048 sec  
 RG 193.34  
 DW 16.800 usec  
 DE 6.50 usec  
 TE 296.8 K  
 D1 1.50000000 sec  
 D11 0.03000000 sec  
 TDO 1

===== CHANNEL f1 =====  
 NUC1 13C  
 P1 10.00 usec  
 PLW1 53.00000000 W  
 SFO1 100.6228293 MHz

===== CHANNEL f2 =====  
 CPDPRG[2] waltz16  
 NUC2 1H  
 PCPD2 80.00 usec  
 PLW2 12.50000000 W  
 PLW12 0.43945000 W  
 PLW13 0.28125000 W  
 SFO2 400.1316005 MHz

F2 - Processing parameters  
 SI 32768  
 SF 100.6126855 MHz  
 WDW EM  
 SSB 0  
 LB 1.00 Hz  
 GB 0  
 PC 1.40

20182117-B12M-Menthyl 10 mg white solid  $[\text{Et}_3\text{NH}]_2[\text{B}_{12}\text{H}_{11}\text{NHCO}(\text{Menthyl})]$  dissolved in 0.6 mL acetone- $d_6^*$

$^{13}\text{C}$ DEPT NMR 100 MHz

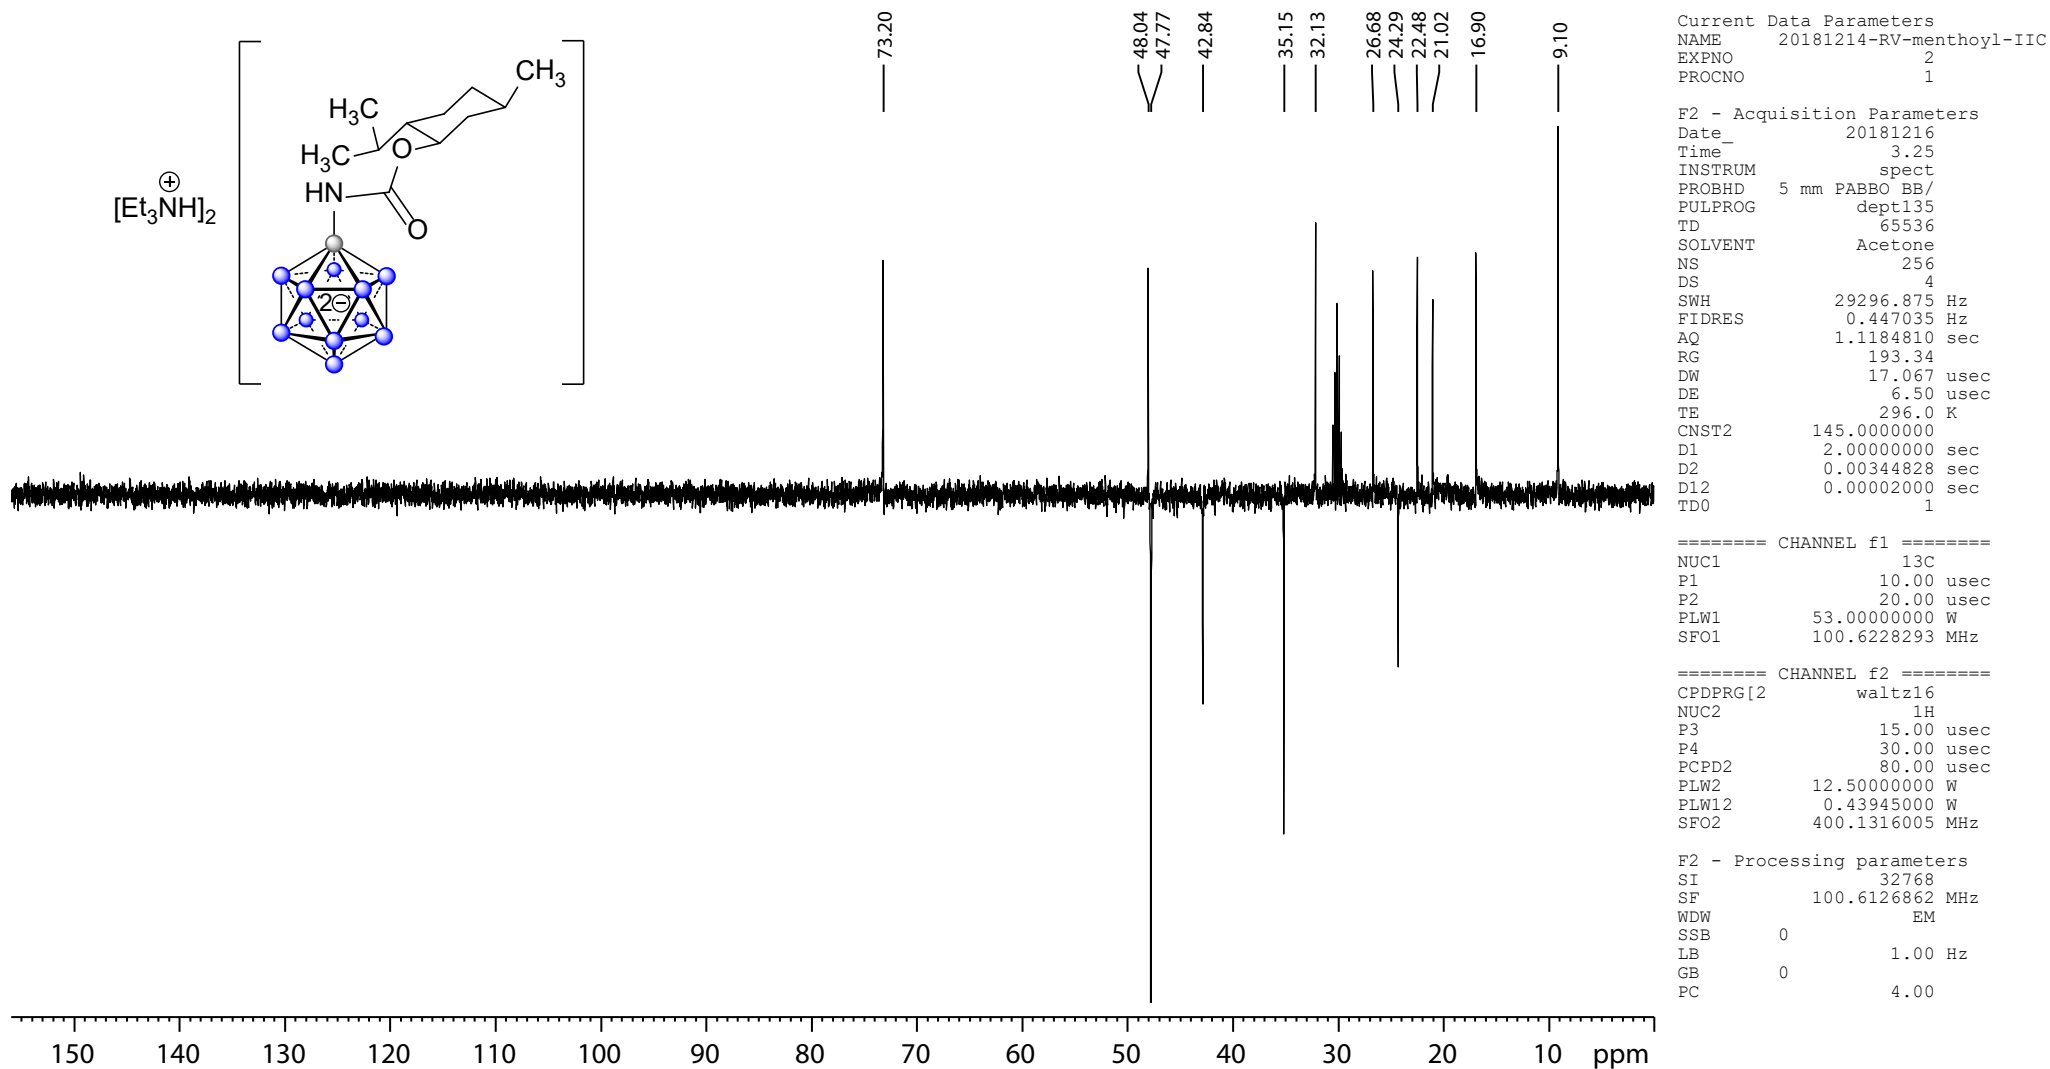



20182117-B12M-Menthyl 10 mg white solid  $[\text{Et}_3\text{NH}]_2[\text{B}_{12}\text{H}_{11}\text{NHCO}(\text{Menthyl})]$  dissolved in 0.6 mL acetone- $d_6^*$

$^1\text{H} - ^{13}\text{C}$  HSQC NMR

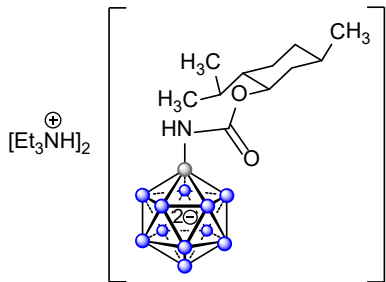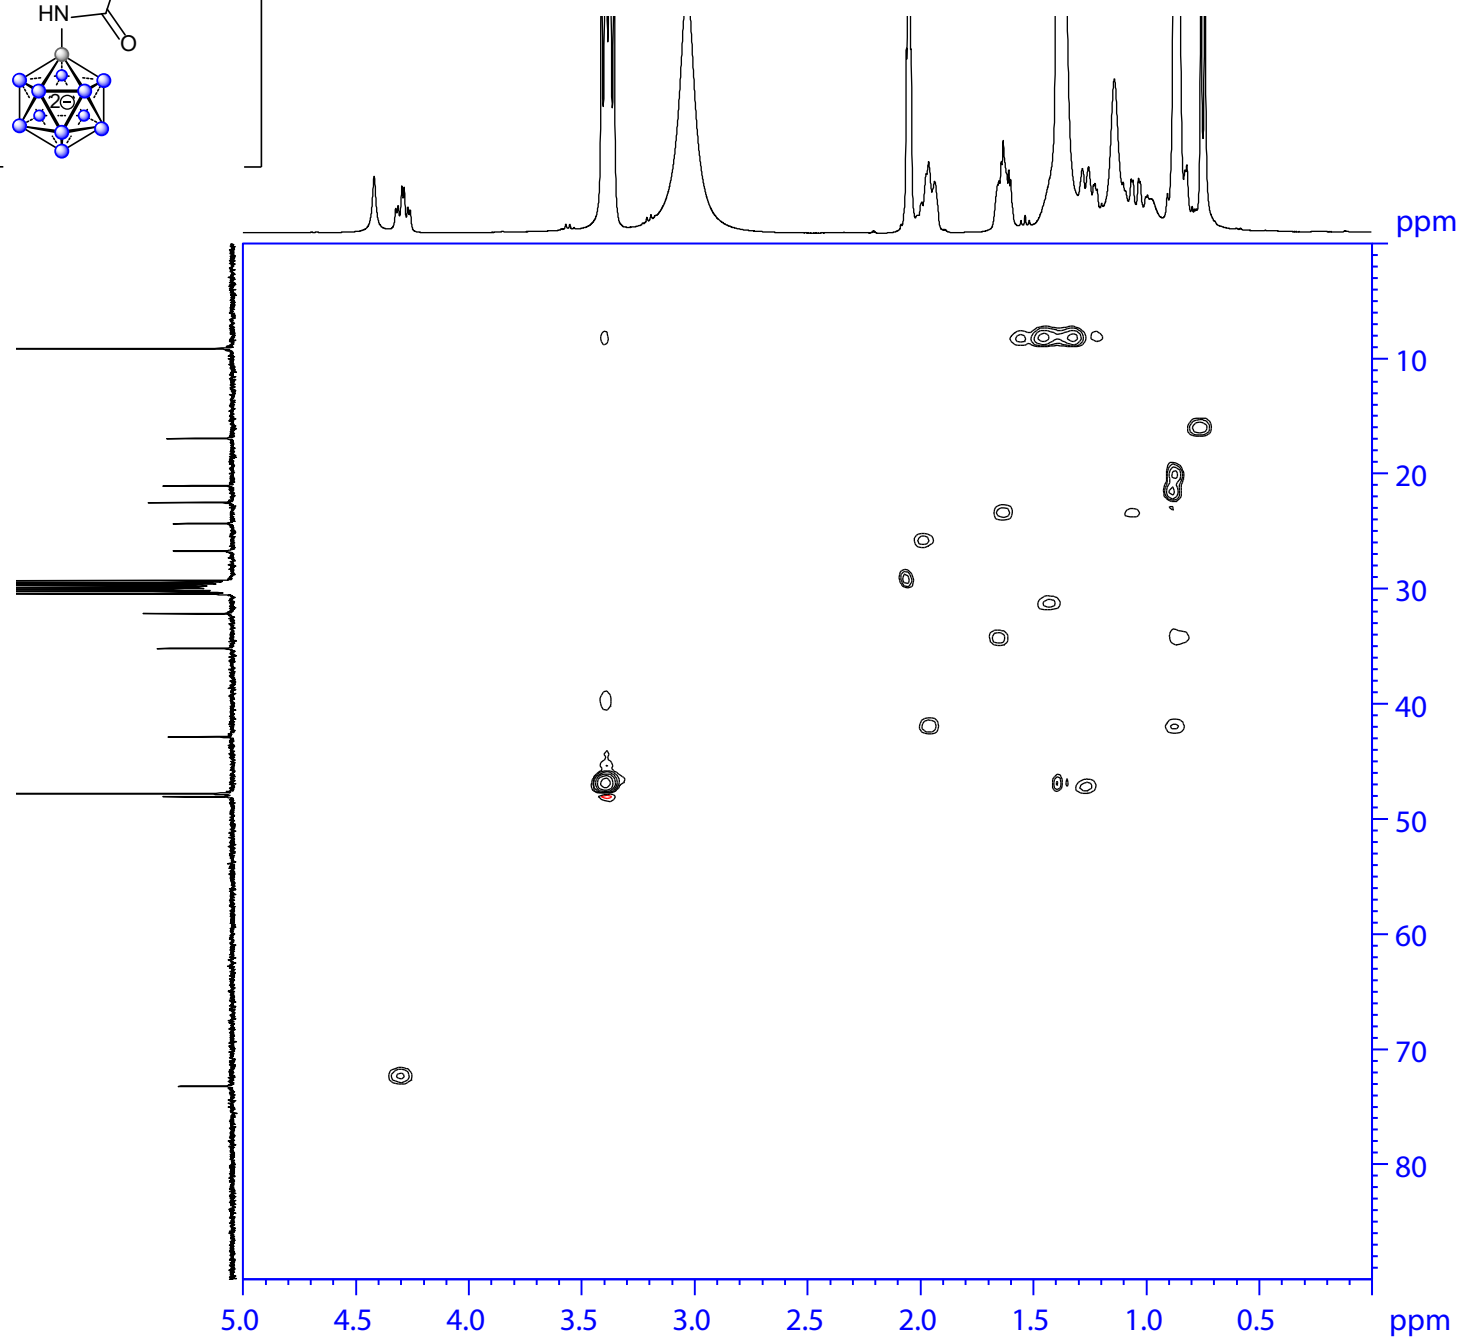

Current Data Parameters  
 NAME 20181214-RV-menthyl-IIC  
 EXPNO 3  
 PROCNO 1

F2 - Acquisition Parameters  
 Date 20181216  
 Time 3.26  
 INSTRUM spect  
 PROBHD 5 mm PABBO BB/  
 PULPROG hsqcetpsi2  
 TD 1024  
 SOLVENT Acetone  
 NS 2  
 DS 16  
 SWH 6009.615 Hz  
 FIDRES 5.868765 Hz  
 AQ 0.0851968 sec  
 RG 193.34  
 DW 83.200 usec  
 DE 6.50 usec  
 TE 295.8 K  
 CNST2 145.0000000  
 D0 0.00000300 sec  
 D1 1.50000000 sec  
 D4 0.00172414 sec  
 D11 0.03000000 sec  
 D16 0.00020000 sec  
 D24 0.00086207 sec  
 IN0 0.00001990 sec  
 ZGOPTNS

===== CHANNEL f1 =====  
 NUC1 1H  
 P1 15.00 usec  
 P2 30.00 usec  
 P28 1000.00 usec  
 PLW1 12.50000000 W  
 SFO1 400.1328009 MHz

===== CHANNEL f2 =====  
 CPDPRG[2] garp  
 NUC2 13C  
 P3 10.00 usec  
 P4 20.00 usec  
 PCPD2 70.00 usec  
 PLW2 53.00000000 W  
 PLW12 1.08159995 W  
 SFO2 100.6238364 MHz

===== GRADIENT CHANNEL =====  
 GPNAM[1] SMSQ10.100  
 GPNAM[2] SMSQ10.100  
 GPNAM[3] SMSQ10.100  
 GPNAM[4] SMSQ10.100  
 GPZ1 80.00 %  
 GPZ2 20.10 %  
 GPZ3 11.00 %  
 GPZ4 -5.00 %  
 P16 1000.00 usec  
 P19 600.00 usec

F1 - Acquisition parameters  
 TD 256  
 SFO1 100.6238 MHz  
 FIDRES 196.524048 Hz  
 SW 249.991 ppm  
 FnMODE Echo-Antiecho

F2 - Processing parameters  
 SI 1024  
 SF 400.1300000 MHz  
 WDW QSINE  
 SSB 2  
 LB 0 Hz  
 GB 0  
 PC 1.40

F1 - Processing parameters  
 SI 1024  
 MC2 echo-antiecho  
 SF 100.6127690 MHz  
 WDW QSINE  
 SSB 2  
 LB 0 Hz  
 GB 0

20190704-B12C-Styr 20 mg white solid  $[\text{Et}_3\text{NH}][\text{B}_{12}\text{H}_{10}\text{NHCO}(\text{Camphanic})\text{CH}_2\text{CH}_2\text{C}_6\text{H}_5]$  dissolved in 0.6 mL acetone- $d_6^*$   
 400MHz  $^1\text{H}$  NMR,  $\circ$  deuterated solvent residual peak= 2.05 ppm;  $\diamond$  water peak

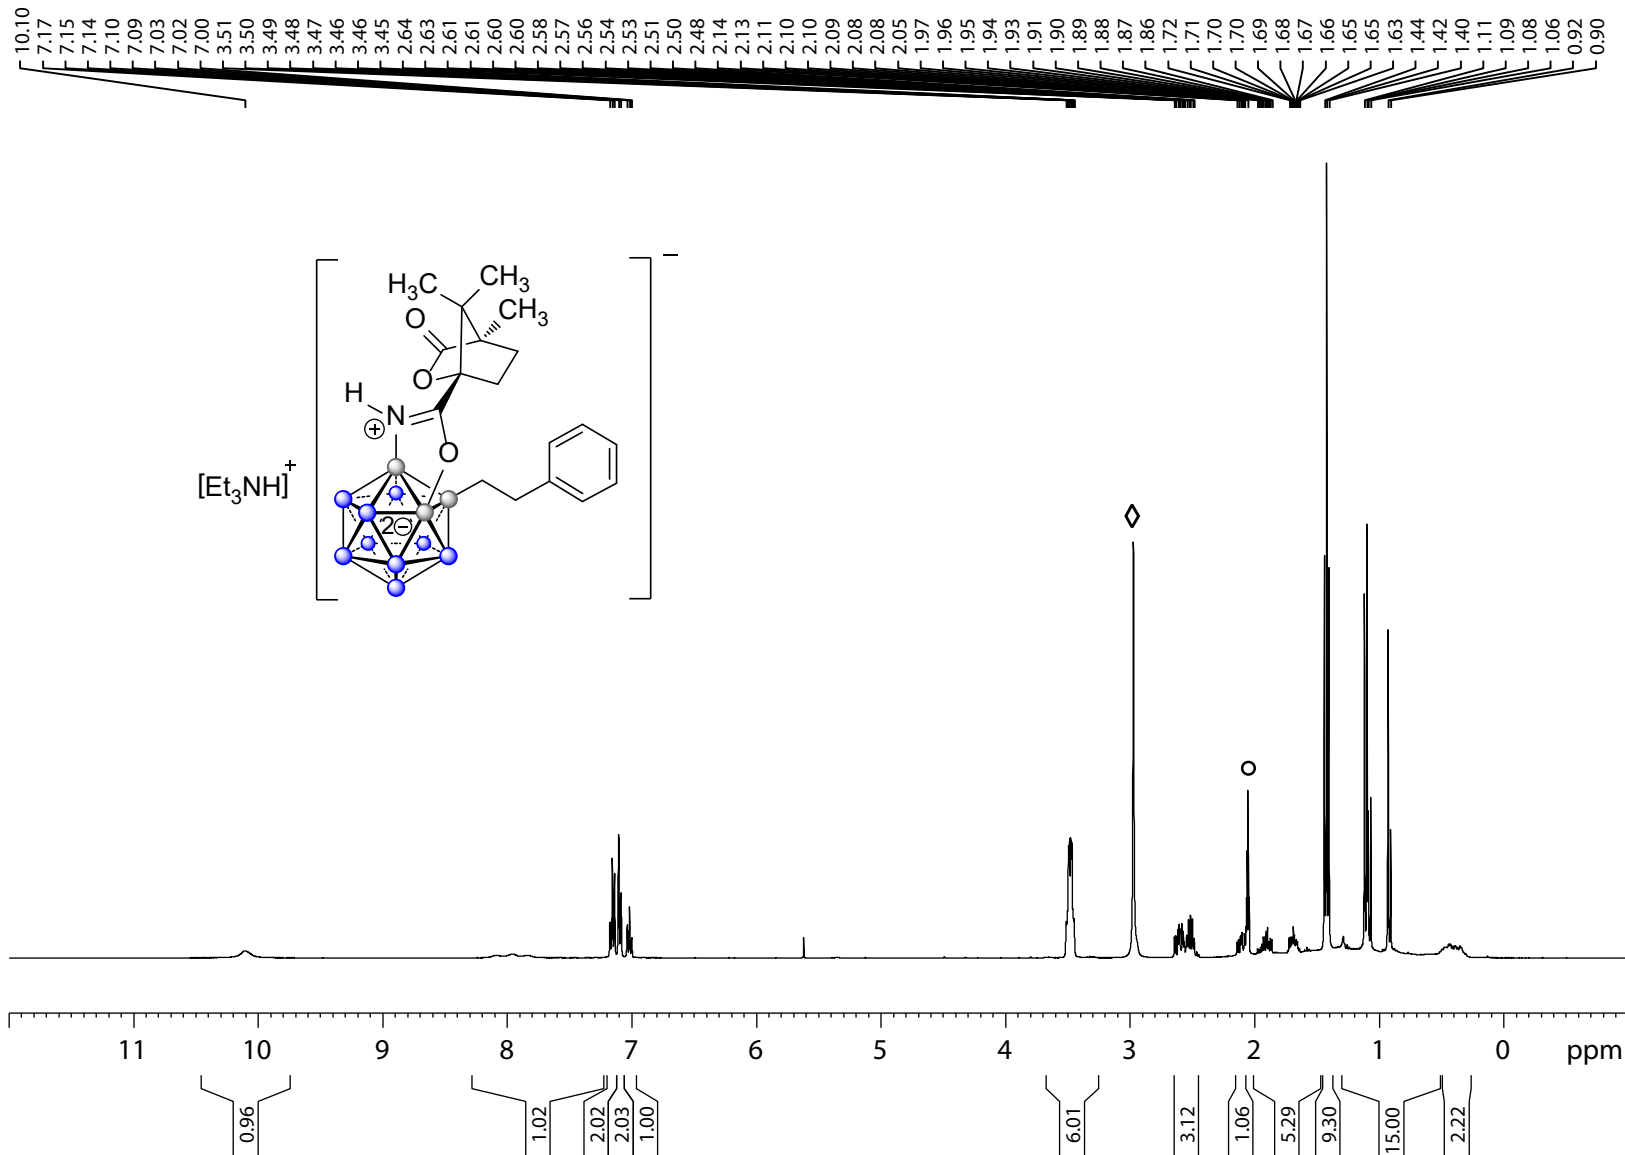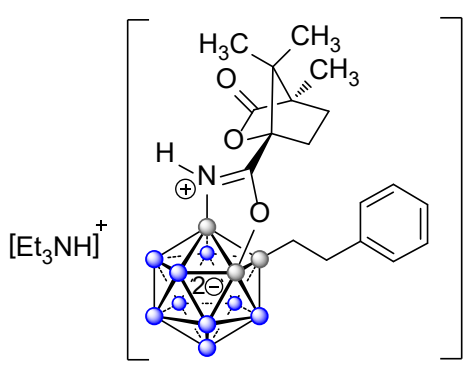

Current Data Parameters  
 NAME 20190704-RV-B12C-Styr  
 EXPNO 1  
 PROCNO 1

F2 - Acquisition Parameters  
 Date\_ 20190704  
 Time 20.39  
 INSTRUM spect  
 PROBHD 5 mm PABBO BB/  
 PULPROG zg30  
 TD 65536  
 SOLVENT Acetone  
 NS 16  
 DS 2  
 SWH 10000.000 Hz  
 FIDRES 0.152588 Hz  
 AQ 3.2767999 sec  
 RG 95.29  
 DW 50.000 usec  
 DE 6.50 usec  
 TE 296.4 K  
 D1 1.00000000 sec  
 TD0 1

==== CHANNEL f1 =====  
 NUC1 1H  
 P1 15.00 usec  
 PLW1 12.50000000 W  
 SFO1 400.1328009 MHz

F2 - Processing parameters  
 SI 65536  
 SF 400.1300070 MHz  
 WDW EM  
 SSB 0  
 LB 0.30 Hz  
 GB 0  
 PC 1.00

20190704-B12C-Styr 20 mg white solid  $[\text{Et}_3\text{NH}][\text{B}_{12}\text{H}_{10}\text{NHCO}(\text{Camphanic})\text{CH}_2\text{CH}_2\text{C}_6\text{H}_5]$  dissolved in 0.6 mL acetone- $d_6^*$

400MHz  $^1\text{H}\{\text{B}\}$  NMR,  $\circ$  deuterated solvent residual peak= 2.05 ppm;  $\diamond$  water peak

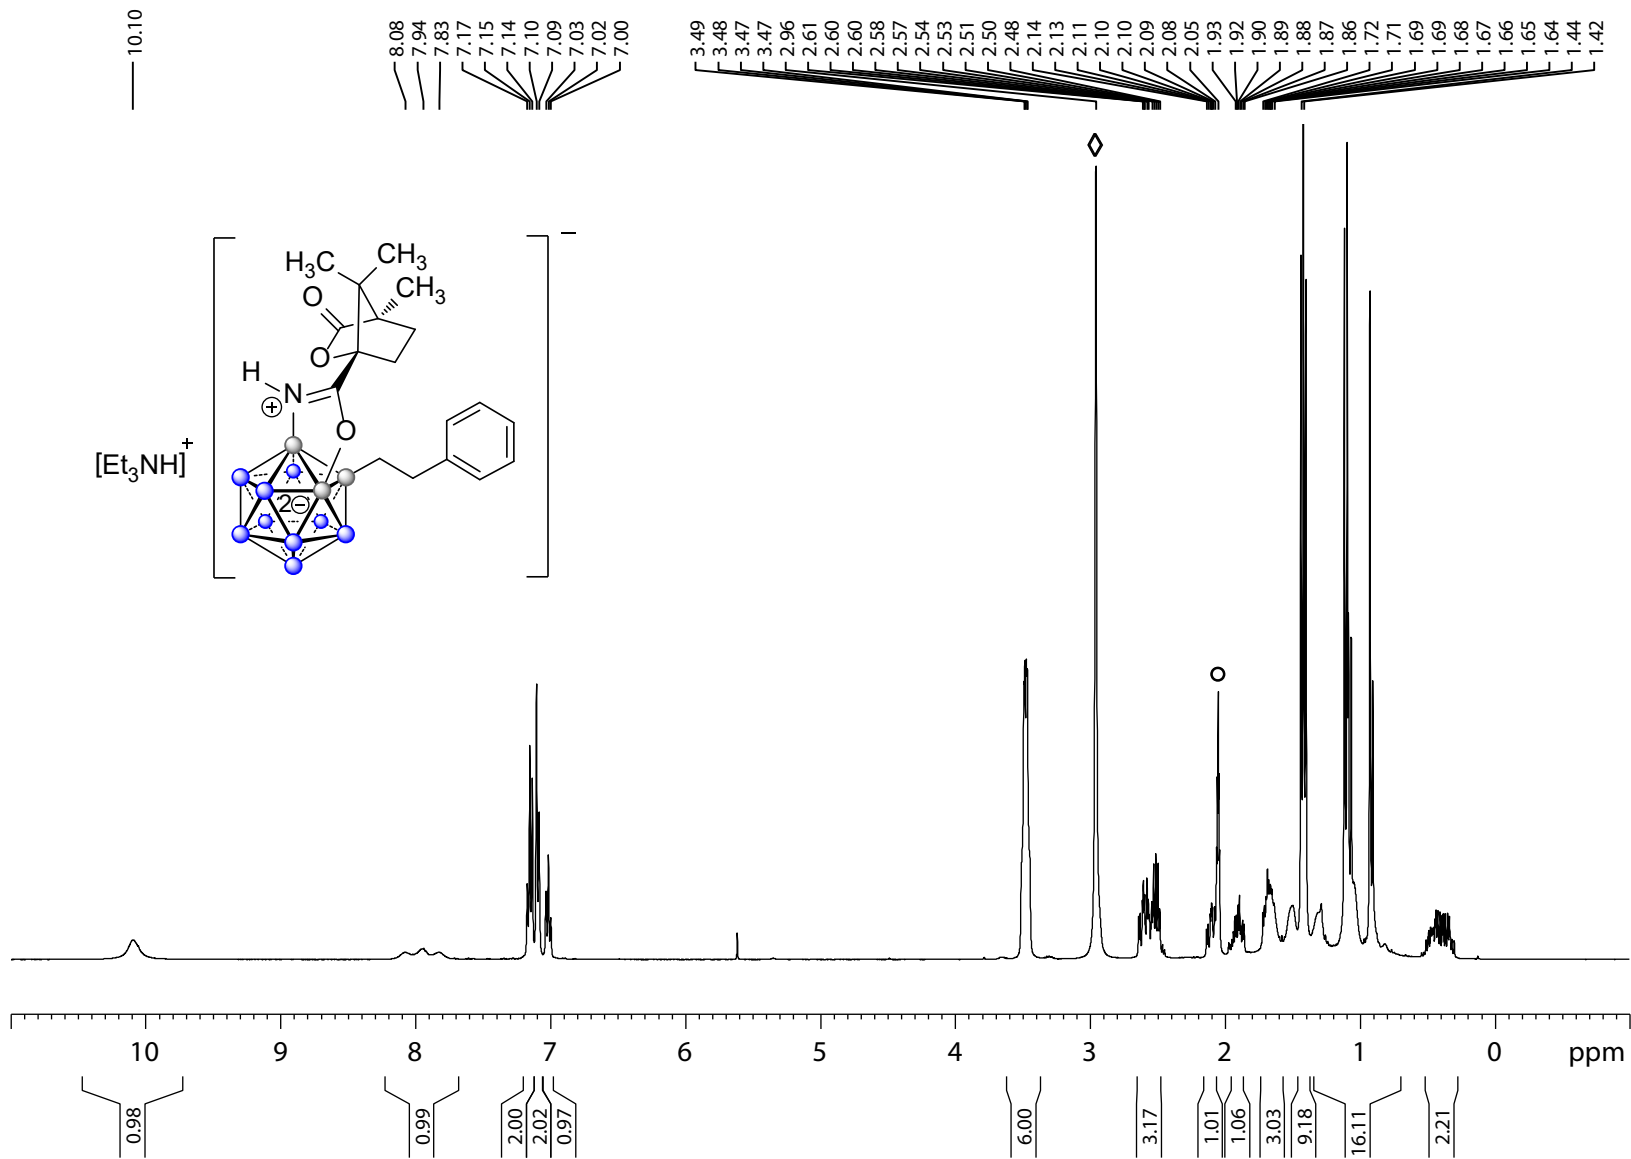

Current Data Parameters  
 NAME 20190704-RV-B12C-Styr  
 EXPNO 2  
 PROCNO 1

F2 - Acquisition Parameters  
 Date\_ 20190704  
 Time\_ 20.41  
 INSTRUM spect  
 PROBHD 5 mm PABBO BB/  
 PULPROG zgig30  
 TD 16384  
 SOLVENT Acetone  
 NS 16  
 DS 4  
 SWH 8012.820 Hz  
 FIDRES 0.489064 Hz  
 AQ 1.0223616 sec  
 RG 107.6  
 DW 62.400 usec  
 DE 6.50 usec  
 TE 296.6 K  
 D1 1.00000000 sec  
 D11 0.03000000 sec  
 TD0 1

==== CHANNEL f1 =====  
 NUC1  $^1\text{H}$   
 P1 15.00 usec  
 PLW1 12.50000000 W  
 SFO1 400.1320007 MHz

==== CHANNEL f2 =====  
 CPDPRG[2] garp4  
 NUC2  $^{11}\text{B}$   
 PCPD2 90.00 usec  
 PLW2 52.96599960 W  
 PLW12 0.64477998 W  
 SFO2 128.3776050 MHz

F2 - Processing parameters  
 SI 32768  
 SF 400.1300070 MHz  
 WDW EM  
 SSB 0  
 LB 1.00 Hz  
 GB 0  
 PC 1.40

20190704-B12C-Styr 20 mg white solid  $[\text{Et}_3\text{NH}][\text{B}_{12}\text{H}_{10}\text{NHCO}(\text{Camphanic})\text{CH}_2\text{CH}_2\text{C}_6\text{H}_5]$  dissolved in 0.6 mL acetone- $d_6$ \*

$^{11}\text{B}$  NMR 128 MHz

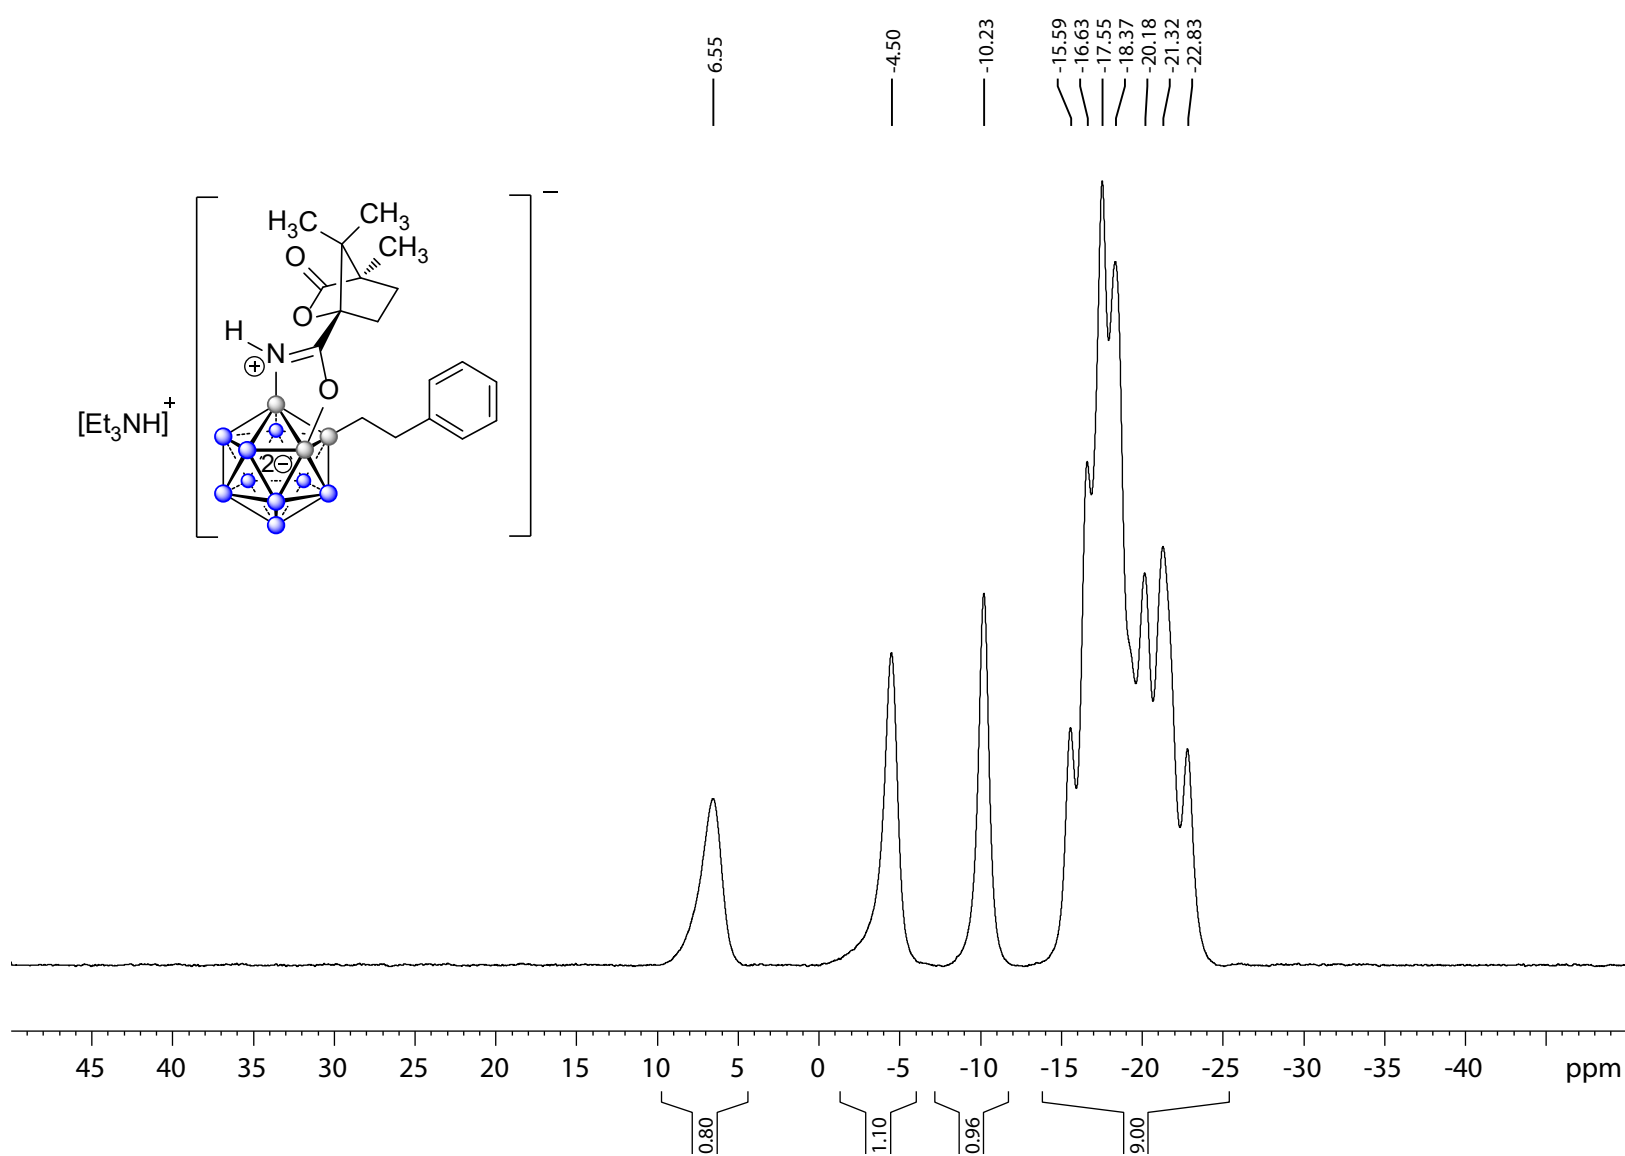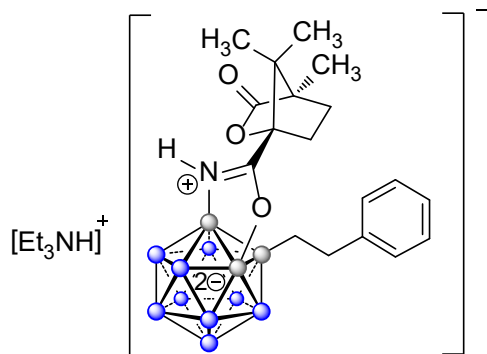

Current Data Parameters  
 NAME 20190703-RV-B12C-Styr  
 EXPNO 3  
 PROCNO 1

F2 - Acquisition Parameters  
 Date\_ 20190704  
 Time\_ 4.41  
 INSTRUM spect  
 PROBHD 5 mm PABBO BB/  
 PULPROG zg  
 TD 65536  
 SOLVENT Acetone  
 NS 128  
 DS 4  
 SWH 25510.203 Hz  
 FIDRES 0.389255 Hz  
 AQ 1.2845056 sec  
 RG 193.34  
 DW 19.600 usec  
 DE 6.50 usec  
 TE 296.1 K  
 D1 1.00000000 sec  
 TD0 1

===== CHANNEL f1 =====  
 NUC1 11B  
 P1 9.93 usec  
 PLW1 52.9659960 W  
 SFO1 128.3776052 MHz

F2 - Processing parameters  
 SI 32768  
 SF 128.3776050 MHz  
 WDW EM  
 SSB 0  
 LB 10.00 Hz  
 GB 0  
 PC 1.40

20190704-B12C-Styr 20 mg white solid [Et<sub>3</sub>NH][B<sub>12</sub>H<sub>10</sub>NHCO(Camphanic)CH<sub>2</sub>CH<sub>2</sub>C<sub>6</sub>H<sub>5</sub>] dissolved in 0.6 mL acetone-*d* 6\*

<sup>11</sup>B{<sup>1</sup>H} NMR 128 MHz

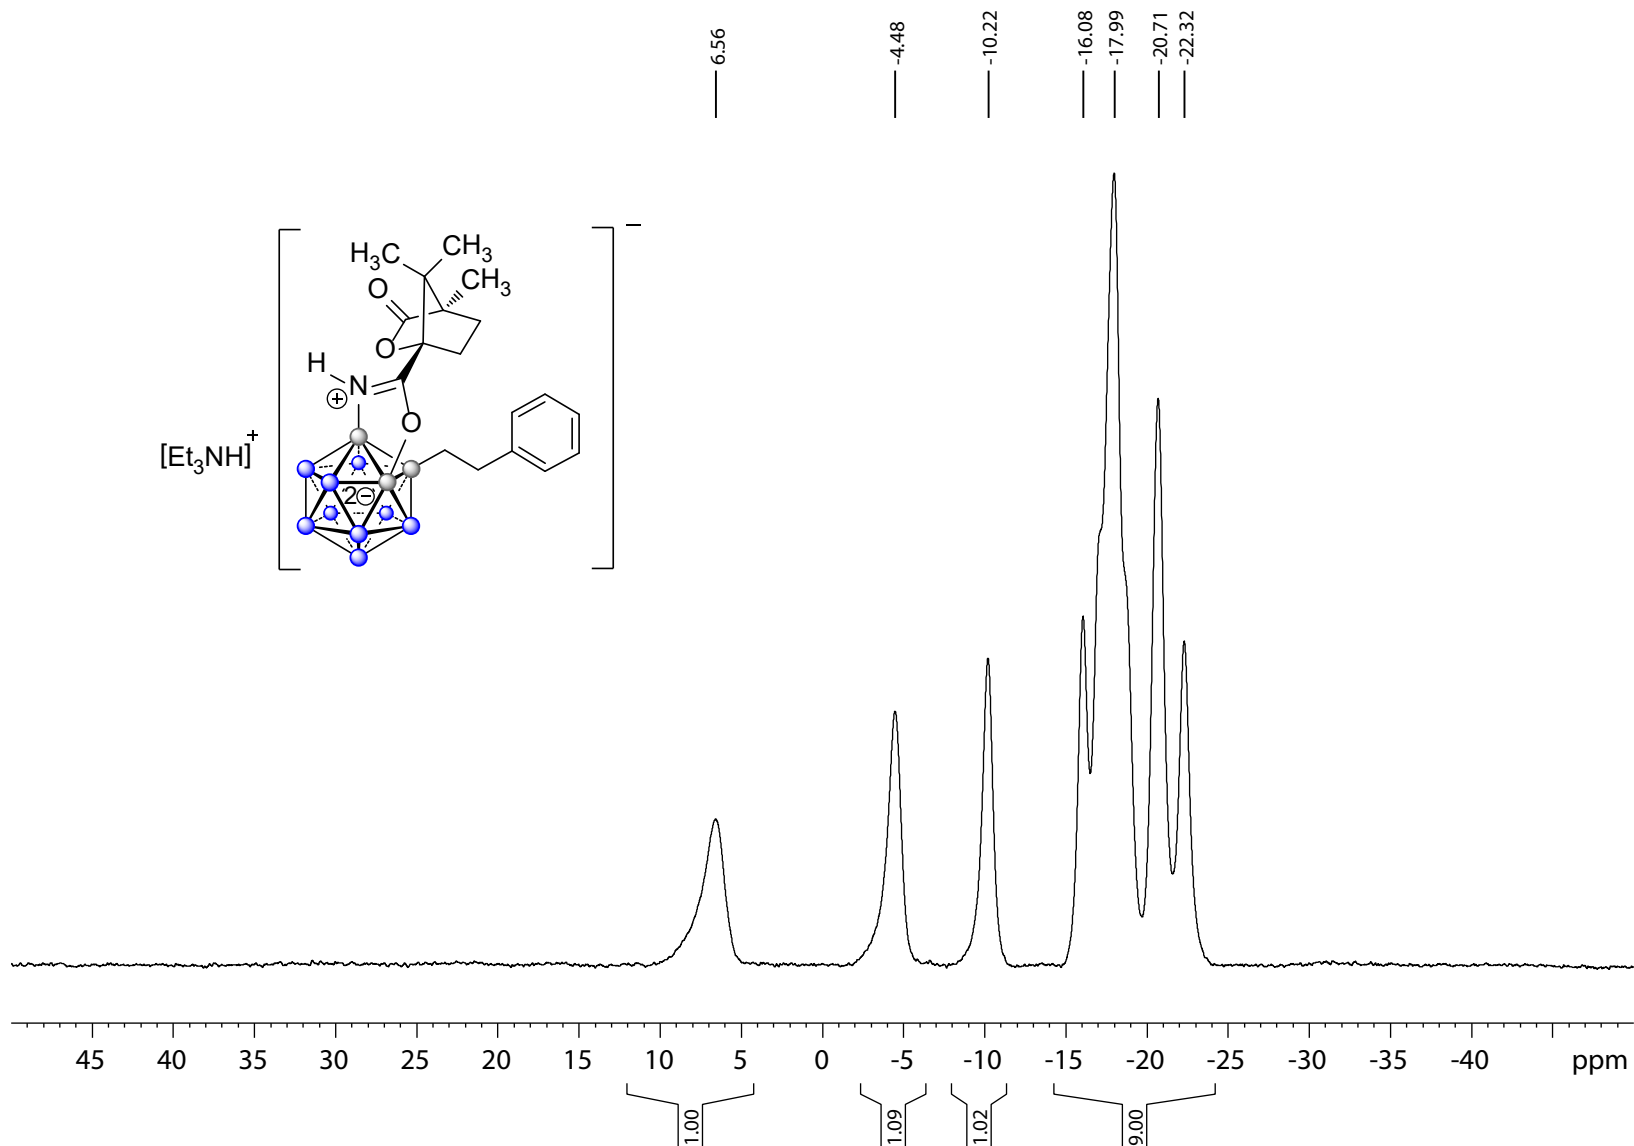

Current Data Parameters  
NAME 20190704-RV-B12C-Styr  
EXPNO 4  
PROCNO 1

F2 - Acquisition Parameters  
Date\_ 20190704  
Time\_ 20.53  
INSTRUM spect  
PROBHD 5 mm PABBO BB/  
PULPROG zgpg30  
TD 65536  
SOLVENT Acetone  
NS 128  
DS 4  
SWH 25510.203 Hz  
FIDRES 0.389255 Hz  
AQ 1.2845056 sec  
RG 193.34  
DW 19.600 usec  
DE 6.50 usec  
TE 296.7 K  
D1 1.00000000 sec  
D11 0.03000000 sec  
TD0 1

==== CHANNEL f1 =====  
NUC1 11B  
P1 9.93 usec  
PLW1 52.96599960 W  
SFO1 128.3776050 MHz

==== CHANNEL f2 =====  
CPDPRG[2] waltz16  
NUC2 1H  
PCPD2 80.00 usec  
PLW2 12.50000000 W  
PLW12 0.43945000 W  
PLW13 0.28125000 W  
SFO2 400.1320007 MHz

F2 - Processing parameters  
SI 32768  
SF 128.3776050 MHz  
WDW EM  
SSB 0  
LB 10.00 Hz  
GB 0  
PC 1.40

20190704-B12C-Styr 20 mg white solid  $[\text{Et}_3\text{NH}][\text{B}_{12}\text{H}_{10}\text{NHCO}(\text{Camphanic})\text{CH}_2\text{CH}_2\text{C}_6\text{H}_5]$  dissolved in 0.6 mL acetone- $d_6^*$

$^{13}\text{C}\{^1\text{H}\}$  NMR 100 MHz

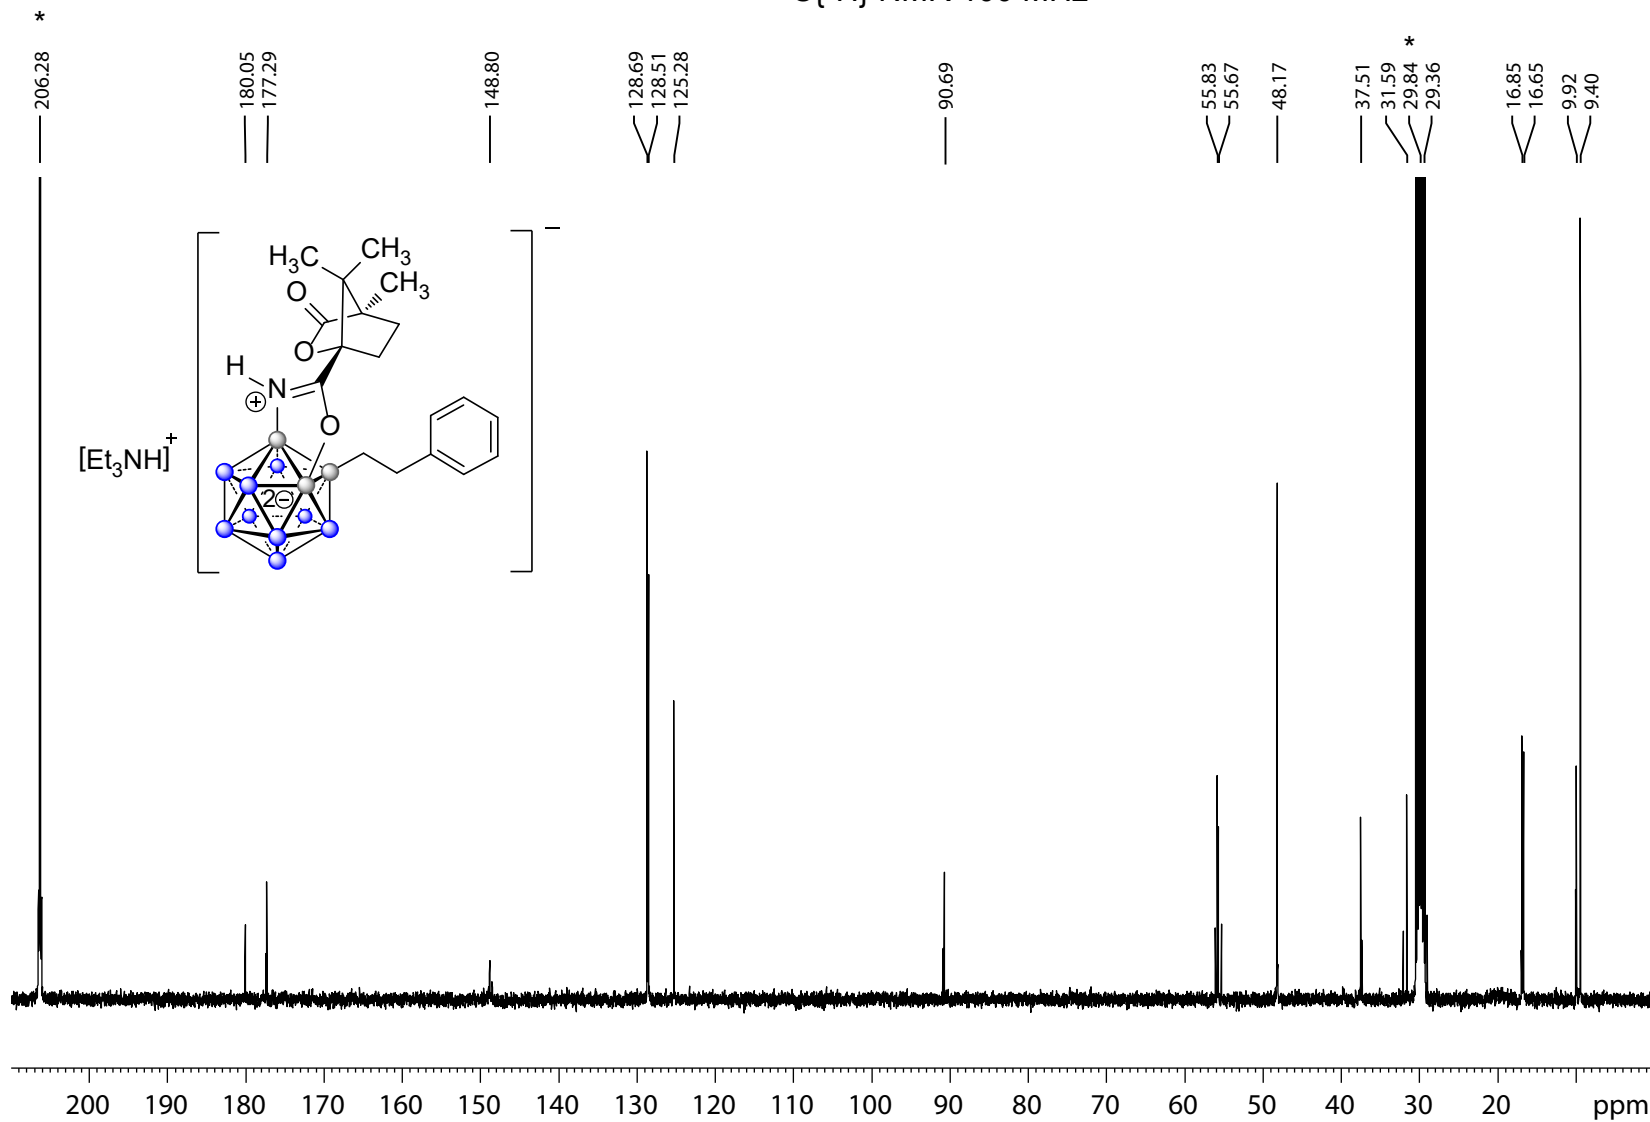

Current Data Parameters  
 NAME 20190704-RV-B12C-Styr  
 EXPNO 5  
 PROCNO 1

F2 - Acquisition Parameters  
 Date\_ 20190704  
 Time\_ 22.26  
 INSTRUM spect  
 PROBHD 5 mm PABBO BB/  
 PULPROG zgpg30  
 TD 65536  
 SOLVENT Acetone  
 NS 2048  
 DS 4  
 SWH 29761.904 Hz  
 FIDRES 0.454131 Hz  
 AQ 1.1010048 sec  
 RG 193.34  
 DW 16.800 usec  
 DE 6.50 usec  
 TE 297.2 K  
 D1 1.50000000 sec  
 D11 0.03000000 sec  
 TD0 1

===== CHANNEL f1 =====  
 NUC1 13C  
 P1 10.00 usec  
 PLW1 53.00000000 W  
 SFO1 100.6228293 MHz

===== CHANNEL f2 =====  
 CPDPRG[2] waltz16  
 NUC2 1H  
 PCPD2 80.00 usec  
 PLW2 12.50000000 W  
 PLW12 0.43945000 W  
 PLW13 0.28125000 W  
 SFO2 400.1316005 MHz

F2 - Processing parameters  
 SI 32768  
 SF 100.6126830 MHz  
 WDW EM  
 SSB 0  
 LB 1.00 Hz  
 GB 0  
 PC 1.40

20190704-B12C-Styr 20 mg white solid  $[\text{Et}_3\text{NH}][\text{B}_{12}\text{H}_{10}\text{NHCO}(\text{Camphanic})\text{CH}_2\text{CH}_2\text{C}_6\text{H}_5]$  dissolved in 0.6 mL acetone- $d_6^*$

$^{13}\text{CDEPT}$  NMR 100 MHz

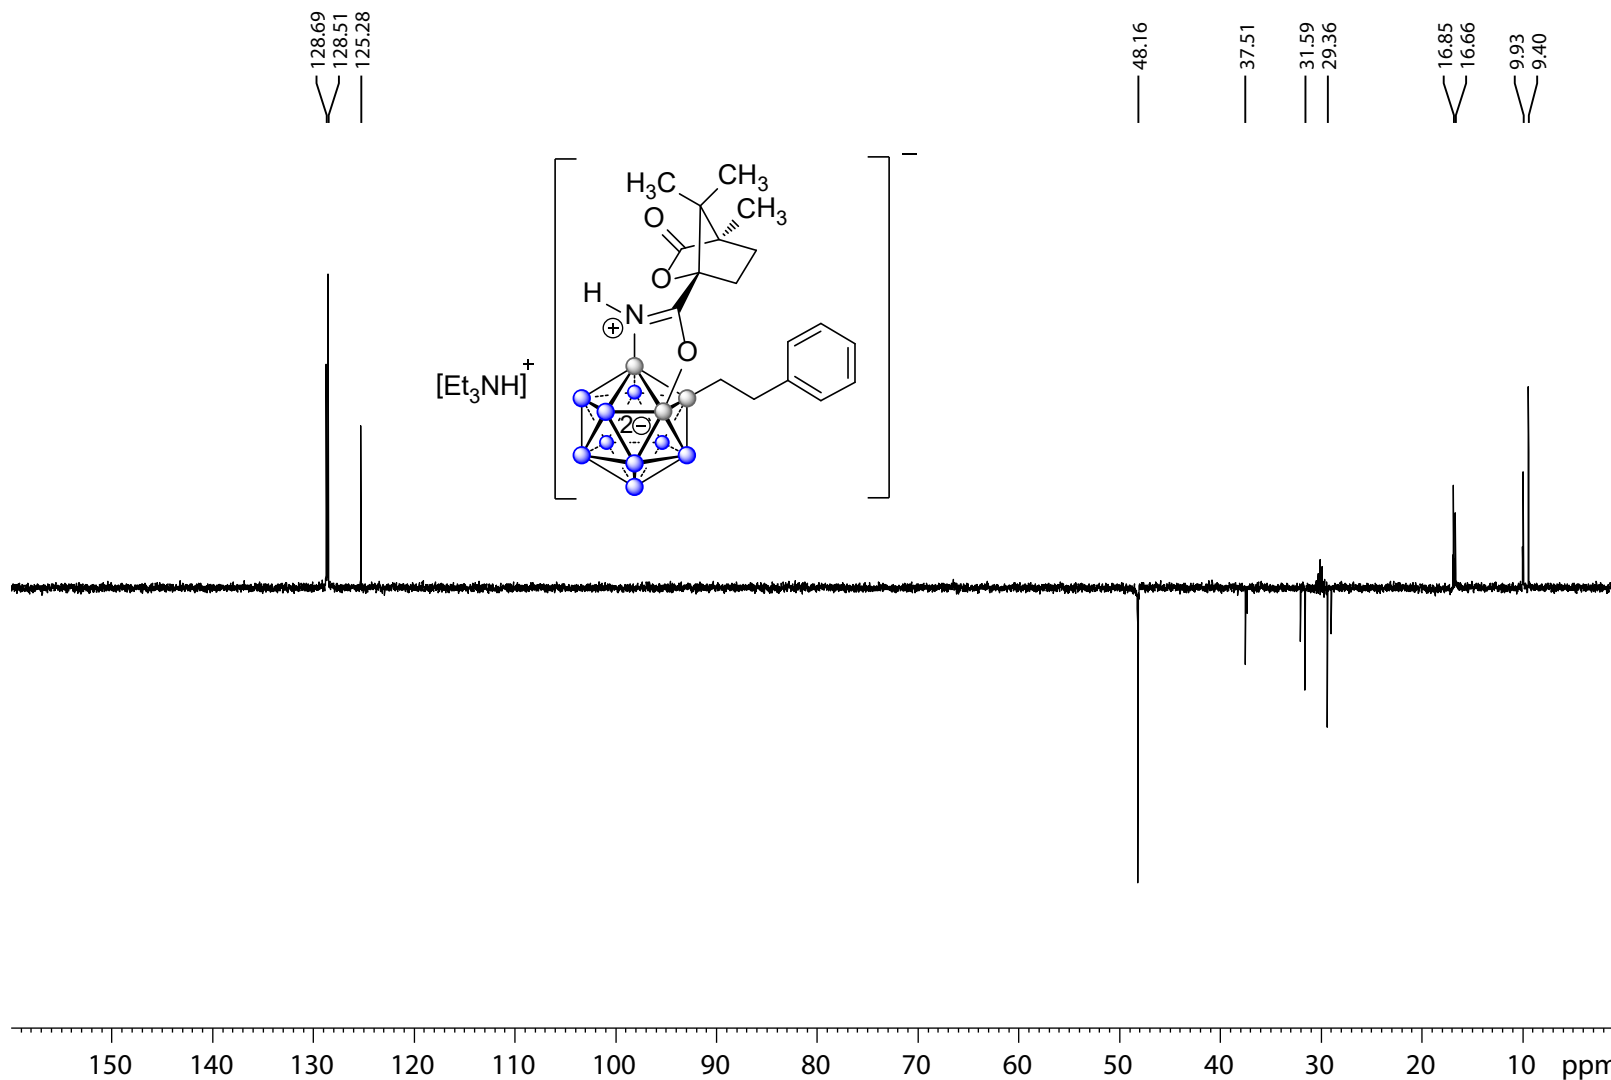

Current Data Parameters  
 NAME 20190704-RV-B12C-Styr  
 EXPNO 6  
 PROCNO 1

F2 - Acquisition Parameters  
 Date\_ 20190704  
 Time\_ 22.54  
 INSTRUM spect  
 PROBHD 5 mm PABBO BB/  
 PULPROG dept135  
 TD 65536  
 SOLVENT Acetone  
 NS 512  
 DS 4  
 SWH 29296.875 Hz  
 FIDRES 0.447035 Hz  
 AQ 1.1184810 sec  
 RG 193.34  
 DW 17.067 usec  
 DE 6.50 usec  
 TE 296.3 K  
 CNST2 145.0000000  
 D1 2.00000000 sec  
 D2 0.00344828 sec  
 D12 0.00002000 sec  
 TD0 1

==== CHANNEL f1 =====  
 NUC1 13C  
 P1 10.00 usec  
 P2 20.00 usec  
 PLW1 53.00000000 W  
 SFO1 100.6228293 MHz

==== CHANNEL f2 =====  
 CPDPRG[2] waltz16  
 NUC2 1H  
 P3 15.00 usec  
 P4 30.00 usec  
 PCPD2 80.00 usec  
 PLW2 12.50000000 W  
 PLW12 0.43945000 W  
 SFO2 400.1316005 MHz

F2 - Processing parameters  
 SI 32768  
 SF 100.6126828 MHz  
 WDW EM  
 SSB 0  
 LB 1.00 Hz  
 GB 0  
 PC 4.00

<sup>1</sup>H - <sup>1</sup>H COSY NMR

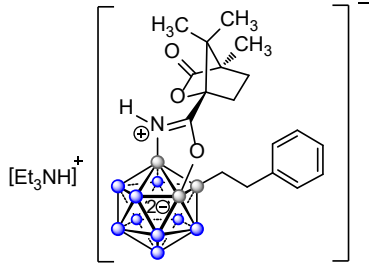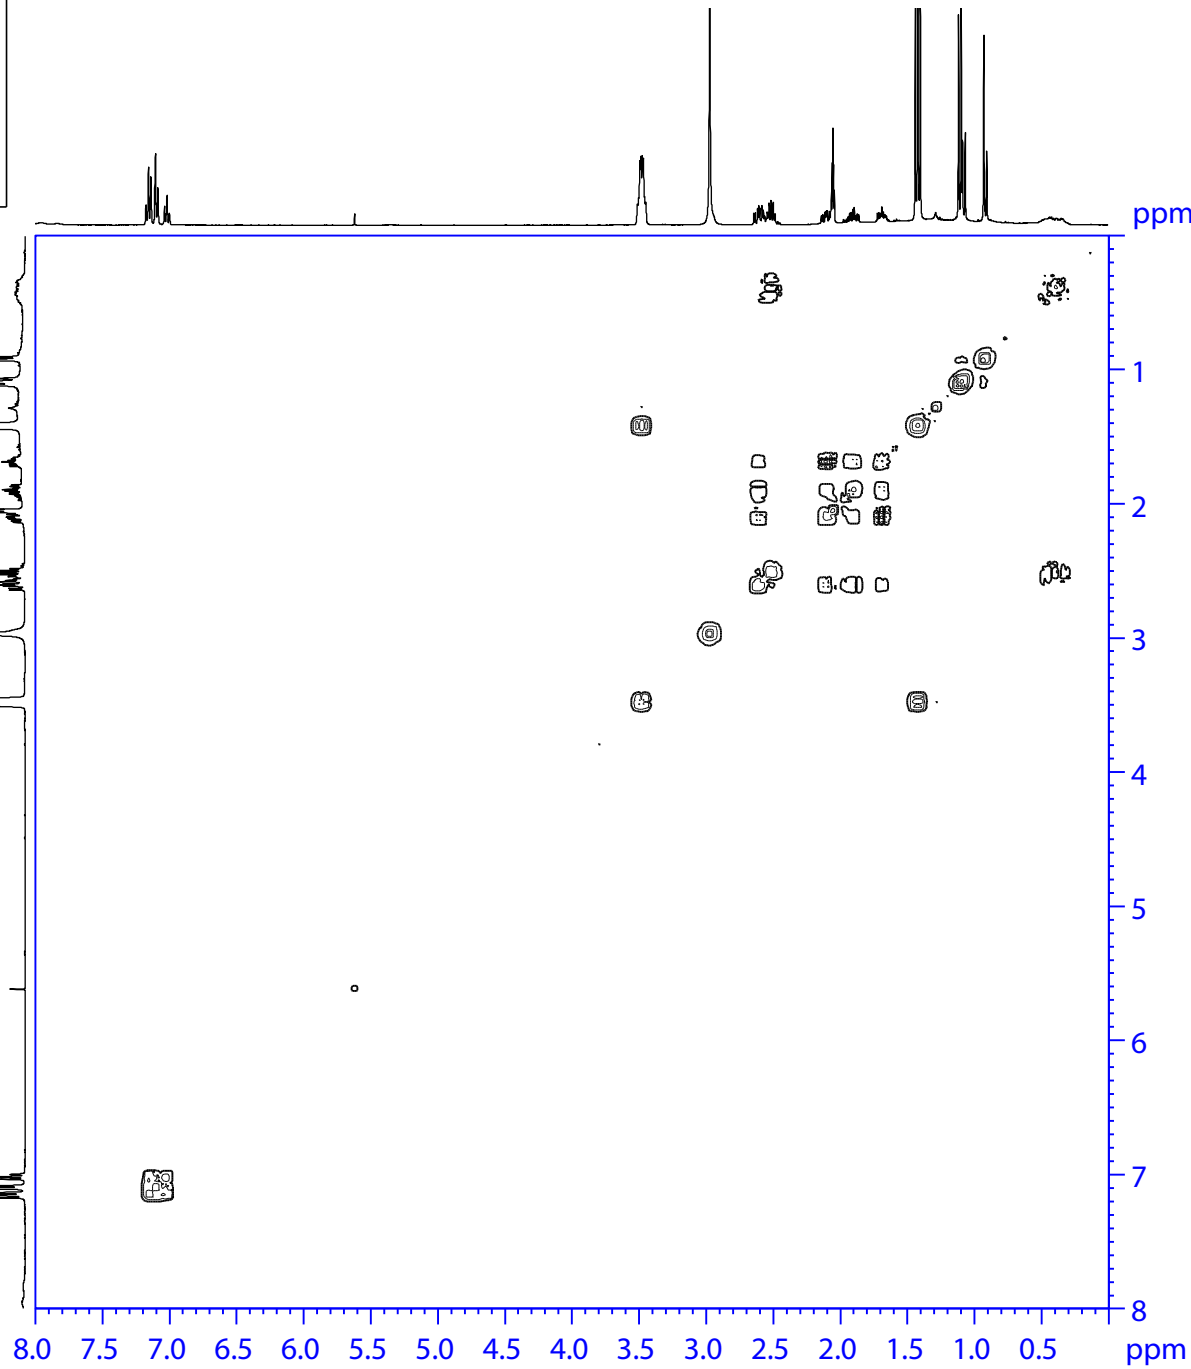

Current Data Parameters  
 NAME 20190704-RV-B12C-Styr  
 EXPNO 7  
 PROCNO 1

F2 - Acquisition Parameters  
 Date\_ 20190704  
 Time 22.55  
 INSTRUM spect  
 PROBHD 5 mm PABBO BB/  
 PULPROG cosygpppqf  
 TD 2048  
 SOLVENT Acetone  
 NS 2  
 DS 8  
 SWH 5341.880 Hz  
 FIDRES 2.608340 Hz  
 AQ 0.1916928 sec  
 RG 170.36  
 DW 93.600 usec  
 DE 6.50 usec  
 TE 296.0 K  
 D0 0.0000300 sec  
 D1 2.0000000 sec  
 D11 0.03000000 sec  
 D12 0.00002000 sec  
 D13 0.00000400 sec  
 D16 0.00020000 sec  
 IN0 0.00018720 sec

===== CHANNEL f1 =====  
 NUC1 1H  
 P0 15.00 usec  
 P1 15.00 usec  
 P17 2500.00 usec  
 PLW1 12.5000000 W  
 PLW10 4.16050005 W  
 SFO1 400.1324057 MHz

===== GRADIENT CHANNEL =====  
 GPNAM[1] SMSQ10.100  
 GPZ1 10.00 %  
 P16 1000.00 usec

F1 - Acquisition parameters  
 TD 128  
 SFO1 400.1324 MHz  
 FIDRES 83.466881 Hz  
 SW 13.350 ppm  
 FnMODE QF

F2 - Processing parameters  
 SI 1024  
 SF 400.1300072 MHz  
 WDW QSINE  
 SSB 0  
 LB 0 Hz  
 GB 0  
 PC 1.40

F1 - Processing parameters  
 SI 1024  
 MC2 QF  
 SF 400.1300074 MHz  
 WDW QSINE  
 SSB 0  
 LB 0 Hz  
 GB 0



20190704-B12C-Styr 20 mg white solid [Et<sub>3</sub>NH][B<sub>12</sub>H<sub>10</sub>NHCO(Camphanic)CH<sub>2</sub>CH<sub>2</sub>C<sub>6</sub>H<sub>5</sub>] dissolved in 0.6 mL acetone-*d* 6\*

<sup>1</sup>H - <sup>13</sup>C HSQC NMR

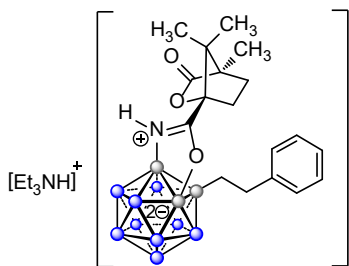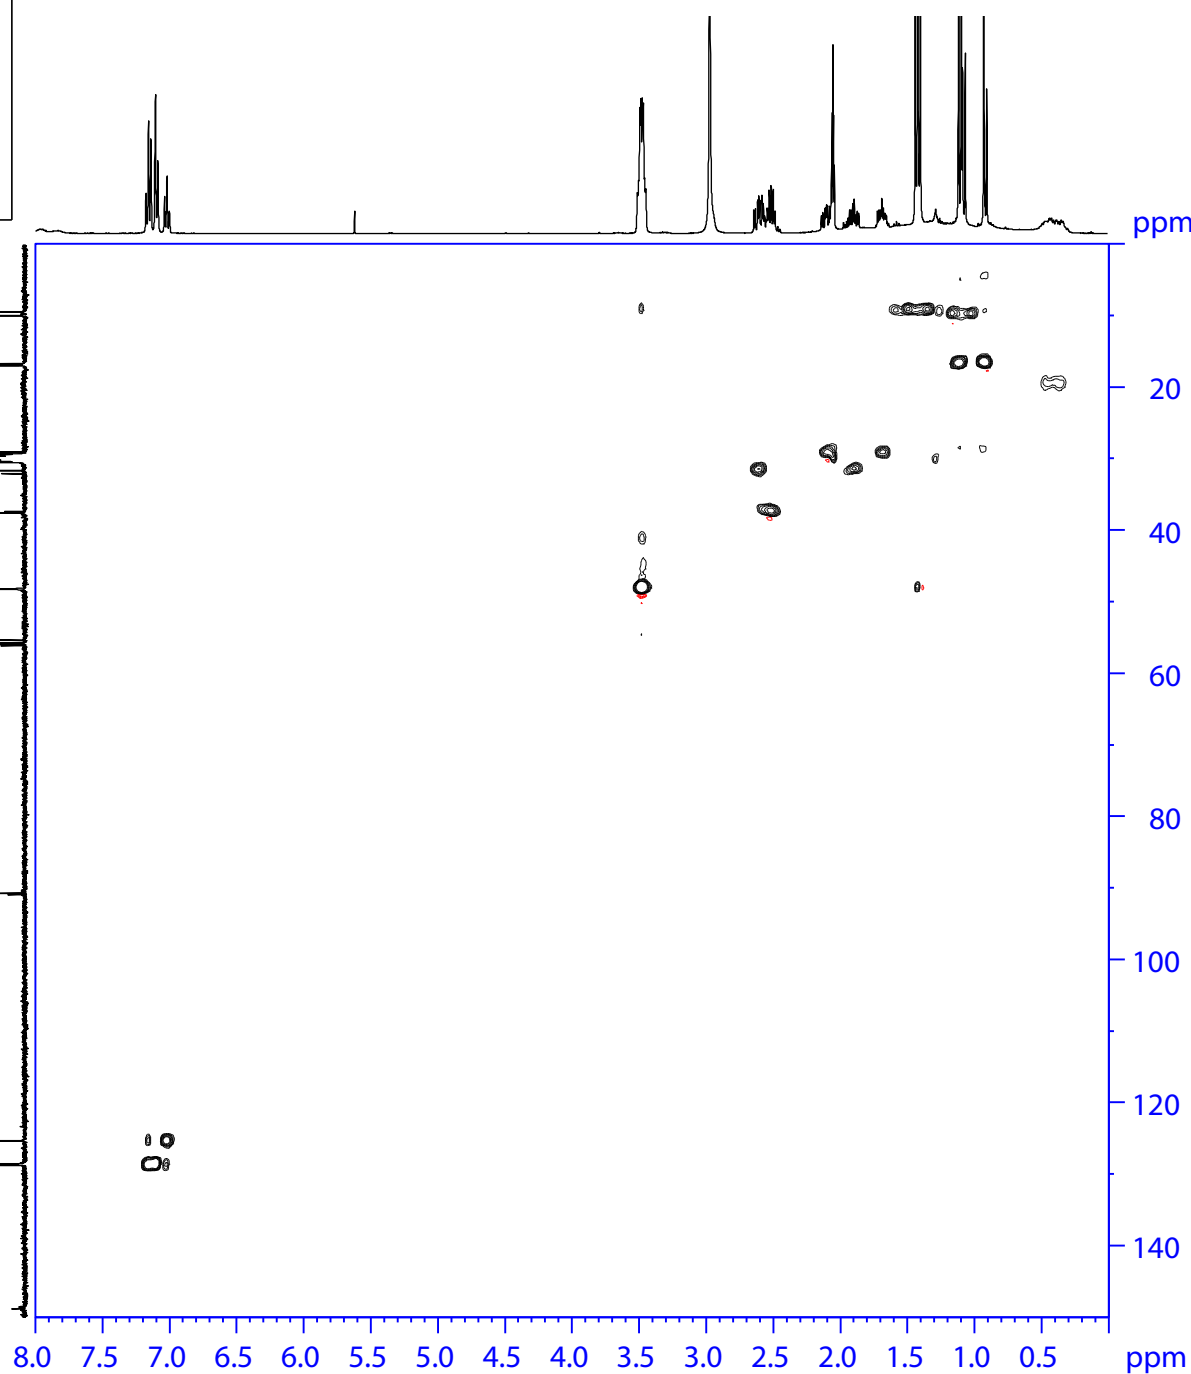

Current Data Parameters  
 NAME 20190704-RV-B12C-Styr  
 EXPNO 8  
 PROCNO 1

F2 - Acquisition Parameters  
 Date\_ 20190704  
 Time 23.05  
 INSTRUM spect  
 PROBHD 5 mm PABBO BB/  
 PULPROG hsqcetgpsiz  
 TD 1024  
 SOLVENT Acetone  
 NS 2  
 DS 16  
 SWH 6009.615 Hz  
 FIDRES 5.868765 Hz  
 AQ 0.0851968 sec  
 RG 193.34  
 DW 83.200 usec  
 DE 6.50 usec  
 TE 296.4 K  
 CNST2 145.0000000  
 D0 0.00000300 sec  
 D1 1.50000000 sec  
 D4 0.00172414 sec  
 D11 0.03000000 sec  
 D16 0.00020000 sec  
 D24 0.00086207 sec  
 IN0 0.00001990 sec  
 ZGOPTNS

===== CHANNEL f1 =====  
 NUC1 <sup>1</sup>H  
 P1 15.00 usec  
 P2 30.00 usec  
 P28 1000.00 usec  
 PLW1 12.50000000 W  
 SFO1 400.1328009 MHz

===== CHANNEL f2 =====  
 CPDPRG2 garp  
 NUC2 <sup>13</sup>C  
 P3 10.00 usec  
 P4 20.00 usec  
 PCPD2 70.00 usec  
 PLW2 53.00000000 W  
 PLW12 1.08159995 W  
 SFO2 100.6238364 MHz

===== GRADIENT CHANNEL =====  
 GPNAM[1] SMSQ10.100  
 GPNAM[2] SMSQ10.100  
 GPNAM[3] SMSQ10.100  
 GPNAM[4] SMSQ10.100  
 GPZ1 80.00 %  
 GPZ2 20.10 %  
 GPZ3 11.00 %  
 GPZ4 -5.00 %  
 P16 1000.00 usec  
 P19 600.00 usec

F1 - Acquisition parameters  
 TD 256  
 SFO1 100.6238 MHz  
 FIDRES 196.524048 Hz  
 SW 249.991 ppm  
 FwMODE Echo-Antiecho

F2 - Processing parameters  
 SI 1024  
 SF 400.1300066 MHz  
 WDW QSINE  
 SSB 2  
 LB 0 Hz  
 GB 0  
 PC 1.40

F1 - Processing parameters  
 SI 1024  
 MC2 echo-antiecho  
 SF 100.6126760 MHz  
 WDW QSINE  
 SSB 2  
 LB 0 Hz  
 GB 0

20190729-B12C-4MeSTYR 20 mg white solid  $[\text{Et}_3\text{NH}][\text{B}_{12}\text{H}_{10}\text{NHCO}(\text{Camphanic})\text{CH}_2\text{CH}_2\text{C}_6\text{H}_4\text{-4Me}]$  dissolved in 0.6 mL acetone- $d_6^*$

400MHz  $^1\text{H}$  NMR,  $\circ$  deuterated solvent residual peak= 2.05 ppm;  $\diamond$  water peak

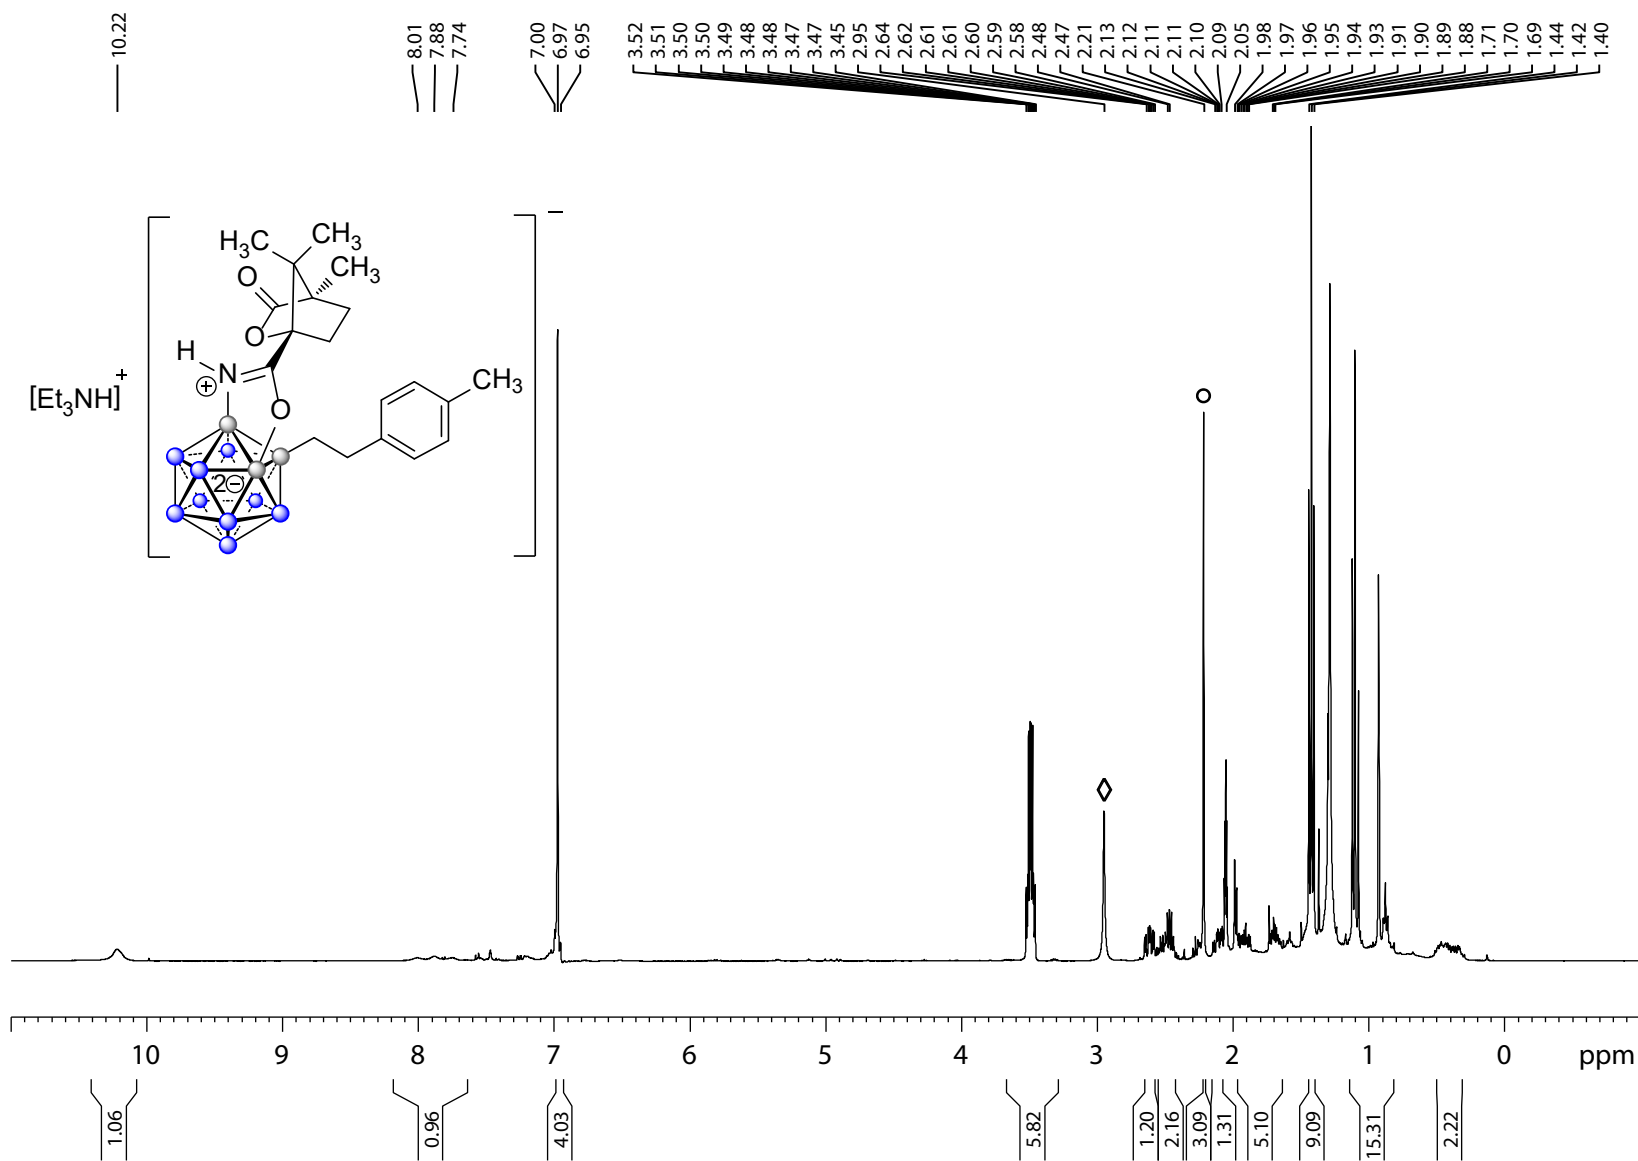

Current Data Parameters  
 NAME 20190729-B12C-4MeSTYR  
 EXPNO 1  
 PROCNO 1

F2 - Acquisition Parameters  
 Date\_ 20190730  
 Time 11.34  
 INSTRUM spect  
 PROBHD 5 mm PABBO BB/  
 PULPROG zg30  
 TD 65536  
 SOLVENT Acetone  
 NS 16  
 DS 2  
 SWH 10000.000 Hz  
 FIDRES 0.152588 Hz  
 AQ 3.2767999 sec  
 RG 78.69  
 DW 50.000 usec  
 DE 6.50 usec  
 TE 294.9 K  
 D1 1.00000000 sec  
 TD0 1

==== CHANNEL f1 =====  
 NUC1 1H  
 P1 15.00 usec  
 PLW1 12.50000000 W  
 SFO1 400.1328009 MHz

F2 - Processing parameters  
 SI 65536  
 SF 400.1300072 MHz  
 WDW EM  
 SSB 0  
 LB 0.30 Hz  
 GB 0  
 PC 1.00

20190729-B12C-4MeSTYR 20 mg white solid [Et<sub>3</sub>NH][B<sub>12</sub>H<sub>10</sub>NHCO(Camphanic)CH<sub>2</sub>CH<sub>2</sub>C<sub>6</sub>H<sub>4</sub>-4Me] dissolved in 0.6 mL acetone-d<sub>6</sub>\*

400MHz <sup>1</sup>H{B} NMR, o deuterated solvent residual peak= 2.05 ppm; ◇ water peak

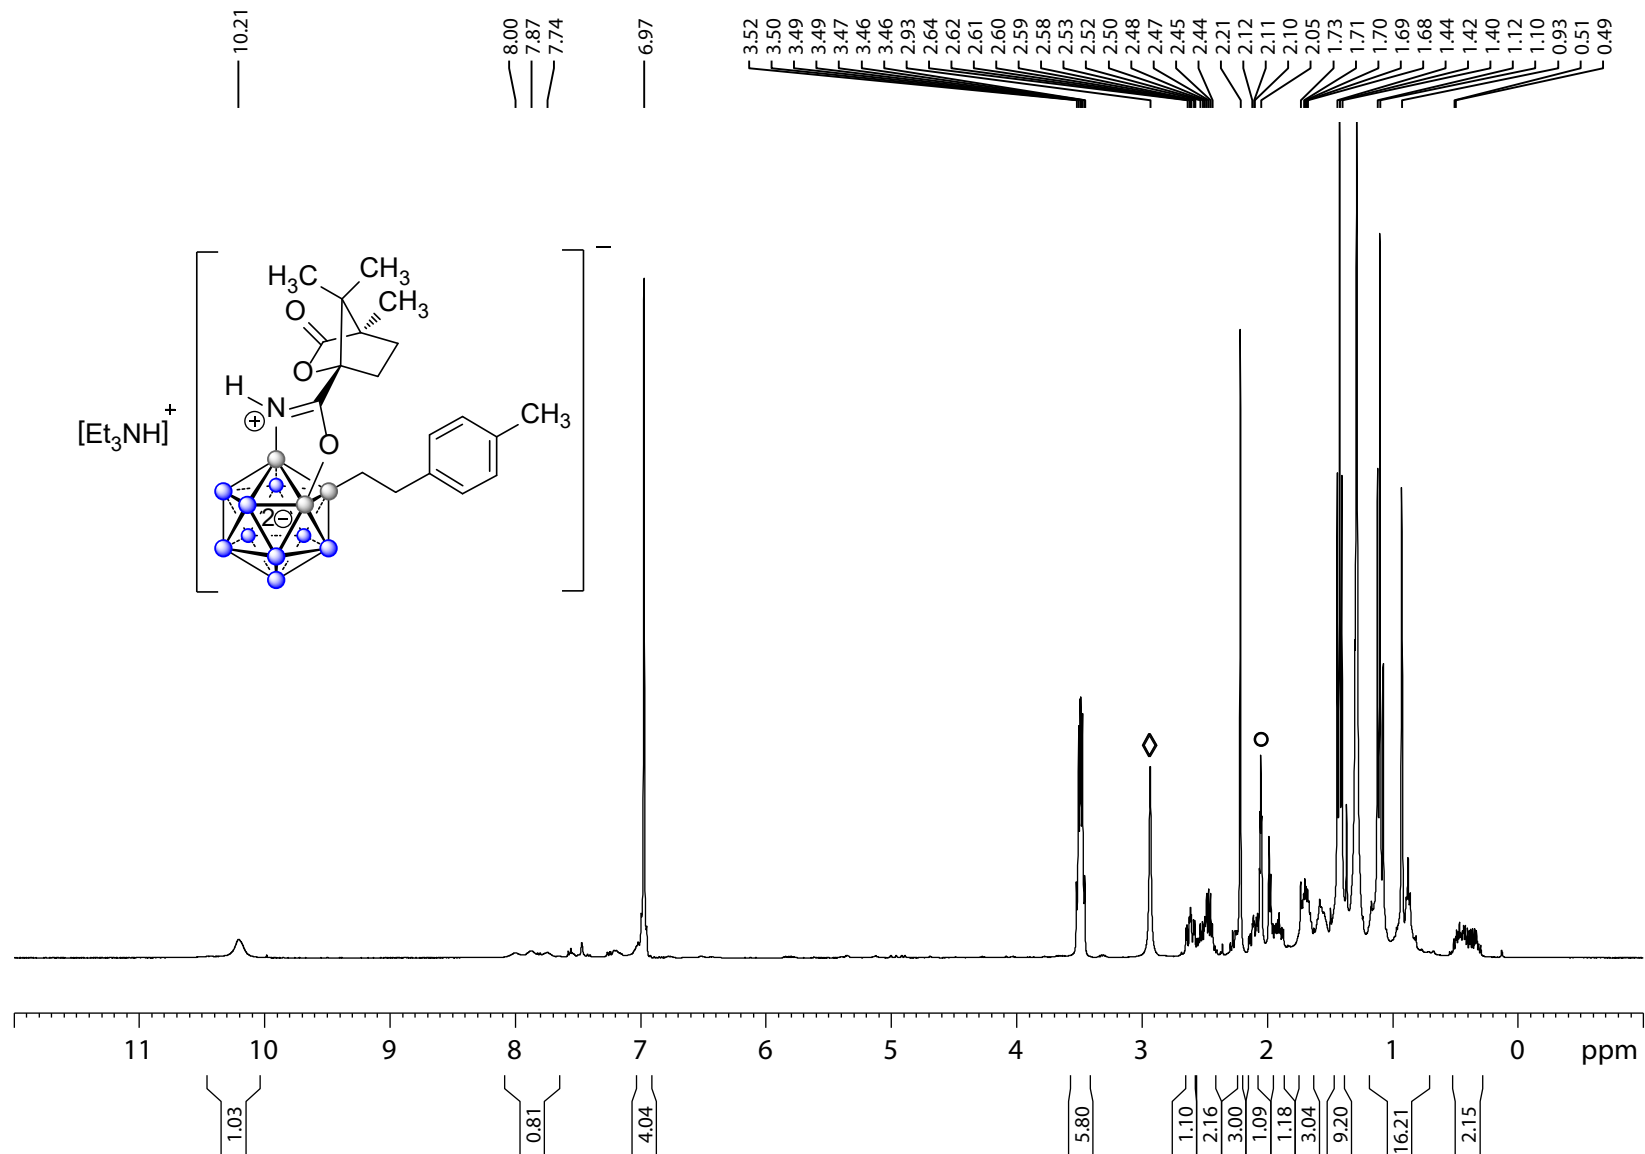

Current Data Parameters  
 NAME 20190729-B12C-4MeSTYR  
 EXPNO 2  
 PROCNO 1

F2 - Acquisition Parameters  
 Date\_ 20190730  
 Time\_ 11.36  
 INSTRUM spect  
 PROBHD 5 mm PABBO BB/  
 PULPROG zgig30  
 TD 16384  
 SOLVENT Acetone  
 NS 16  
 DS 4  
 SWH 8012.820 Hz  
 FIDRES 0.489064 Hz  
 AQ 1.0223616 sec  
 RG 78.69  
 DW 62.400 usec  
 DE 6.50 usec  
 TE 295.4 K  
 D1 1.00000000 sec  
 D11 0.03000000 sec  
 TD0 1

==== CHANNEL f1 =====  
 NUC1 1H  
 P1 15.00 usec  
 PLW1 12.50000000 W  
 SFO1 400.1320007 MHz

==== CHANNEL f2 =====  
 CPDPRG[2] garp4  
 NUC2 11B  
 PCPD2 90.00 usec  
 PLW2 52.96599960 W  
 PLW12 0.64477998 W  
 SFO2 128.3776050 MHz

F2 - Processing parameters  
 SI 32768  
 SF 400.1300073 MHz  
 WDW EM  
 SSB 0  
 LB 1.00 Hz  
 GB 0  
 PC 1.40

20190729-B12C-4MeSTYR 20 mg white solid  $[\text{Et}_3\text{NH}][\text{B}_{12}\text{H}_{10}\text{NHCO}(\text{Camphanic})\text{CH}_2\text{CH}_2\text{C}_6\text{H}_4\text{-4Me}]$  dissolved in 0.6 mL acetone- $d_6^*$

$^{11}\text{B}$  NMR 128 MHz

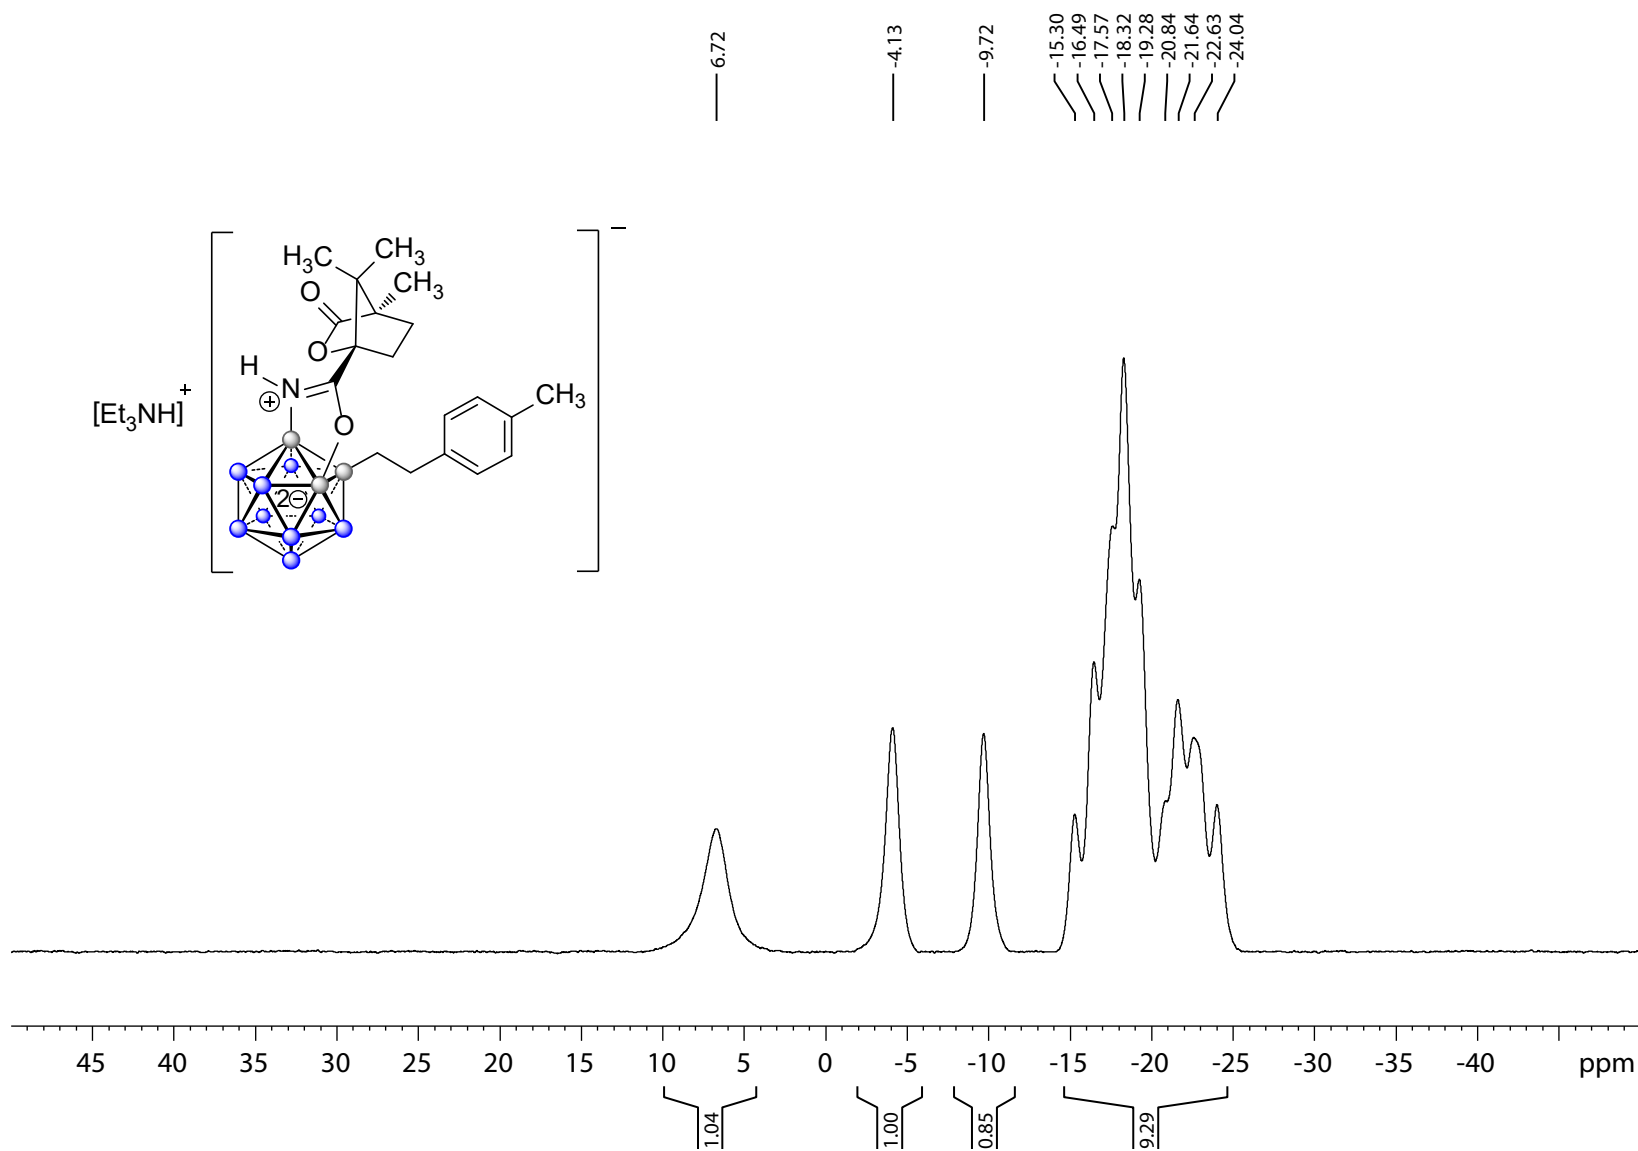

Current Data Parameters  
 NAME 20190729-B12C-4MeSTYR  
 EXPNO 3  
 PROCNO 1

F2 - Acquisition Parameters  
 Date\_ 20190730  
 Time\_ 11.41  
 INSTRUM spect  
 PROBHD 5 mm PABBO BB/  
 PULPROG zg  
 TD 65536  
 SOLVENT Acetone  
 NS 128  
 DS 4  
 SWH 25510.203 Hz  
 FIDRES 0.389255 Hz  
 AQ 1.2845056 sec  
 RG 193.34  
 DW 19.600 usec  
 DE 6.50 usec  
 TE 294.8 K  
 D1 1.0000000 sec  
 TD0 1

==== CHANNEL f1 =====  
 NUC1 11B  
 P1 9.93 usec  
 PLW1 52.96599960 W  
 SFO1 128.3776052 MHz

F2 - Processing parameters  
 SI 32768  
 SF 128.3776050 MHz  
 WDW EM  
 SSB 0  
 LB 10.00 Hz  
 GB 0  
 PC 1.40

20190729-B12C-4MeSTYR 20 mg white solid  $[\text{Et}_3\text{NH}][\text{B}_{12}\text{H}_{10}\text{NHCO}(\text{Camphanic})\text{CH}_2\text{CH}_2\text{C}_6\text{H}_4\text{-4Me}]$  dissolved in 0.6 mL acetone- $d_6^*$

$^1\text{H}$  NMR 128 MHz

Current Data Parameters  
 NAME 20190729-B12C-4MeSTYR  
 EXPNO 4  
 PROCNO 1

F2 - Acquisition Parameters  
 Date\_ 20190730  
 Time\_ 11.48  
 INSTRUM spect  
 PROBHD 5 mm PABBO BB/  
 PULPROG zgpg30  
 TD 65536  
 SOLVENT Acetone  
 NS 128  
 DS 4  
 SWH 25510.203 Hz  
 FIDRES 0.389255 Hz  
 AQ 1.2845056 sec  
 RG 193.34  
 DW 19.600 usec  
 DE 6.50 usec  
 TE 296.0 K  
 D1 1.00000000 sec  
 D11 0.03000000 sec  
 TD0 1

==== CHANNEL f1 =====  
 NUC1 11B  
 P1 9.93 usec  
 PLW1 52.96599960 W  
 SFO1 128.3776050 MHz

==== CHANNEL f2 =====  
 CPDPRG[2] waltz16  
 NUC2 1H  
 PCPD2 80.00 usec  
 PLW2 12.50000000 W  
 PLW12 0.43945000 W  
 PLW13 0.28125000 W  
 SFO2 400.1320007 MHz

F2 - Processing parameters  
 SI 32768  
 SF 128.3776050 MHz  
 WDW EM  
 SSB 0  
 LB 10.00 Hz  
 GB 0  
 PC 1.40

6.66  
 -4.08  
 -9.68  
 -15.79  
 -17.07  
 -17.83  
 -18.78  
 -21.39  
 -21.90  
 -23.54

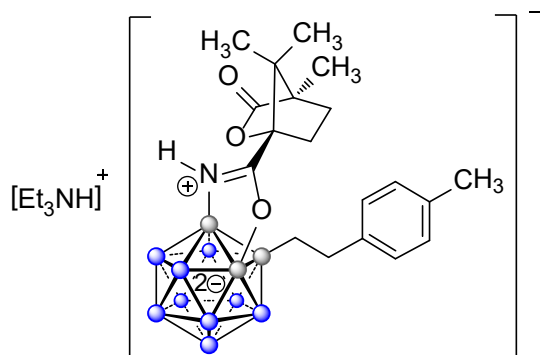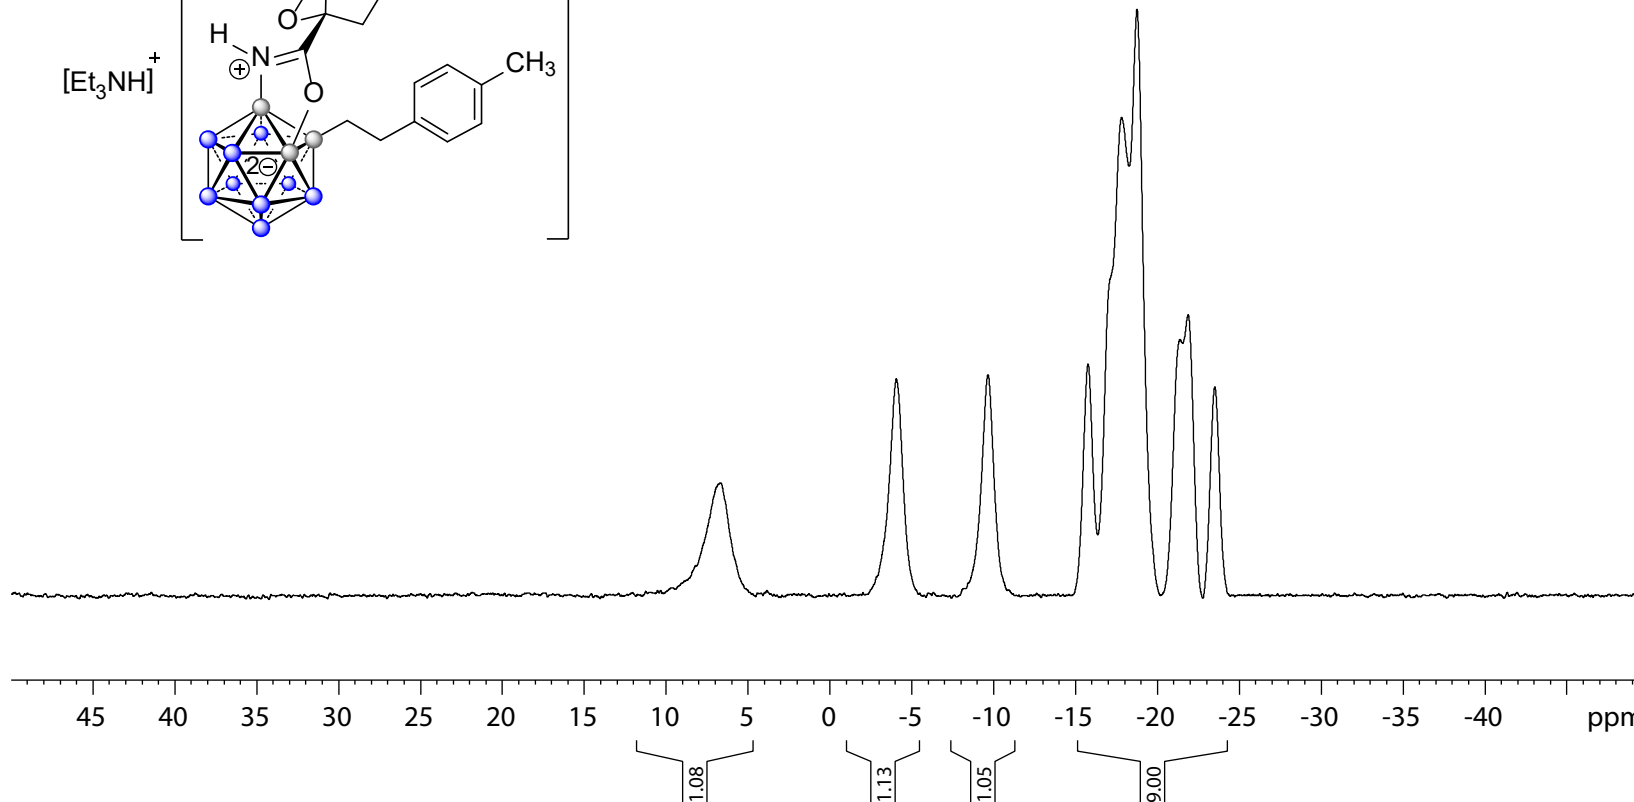

20190729-B12C-4MeSTYR 20 mg white solid [Et<sub>3</sub>NH][B<sub>12</sub>H<sub>10</sub>NHCO(Camphanic)CH<sub>2</sub>CH<sub>2</sub>C<sub>6</sub>H<sub>4</sub>-4Me] dissolved in 0.6 mL acetone-d<sub>6</sub>\*

<sup>13</sup>C{<sup>1</sup>H} NMR 100 MHz

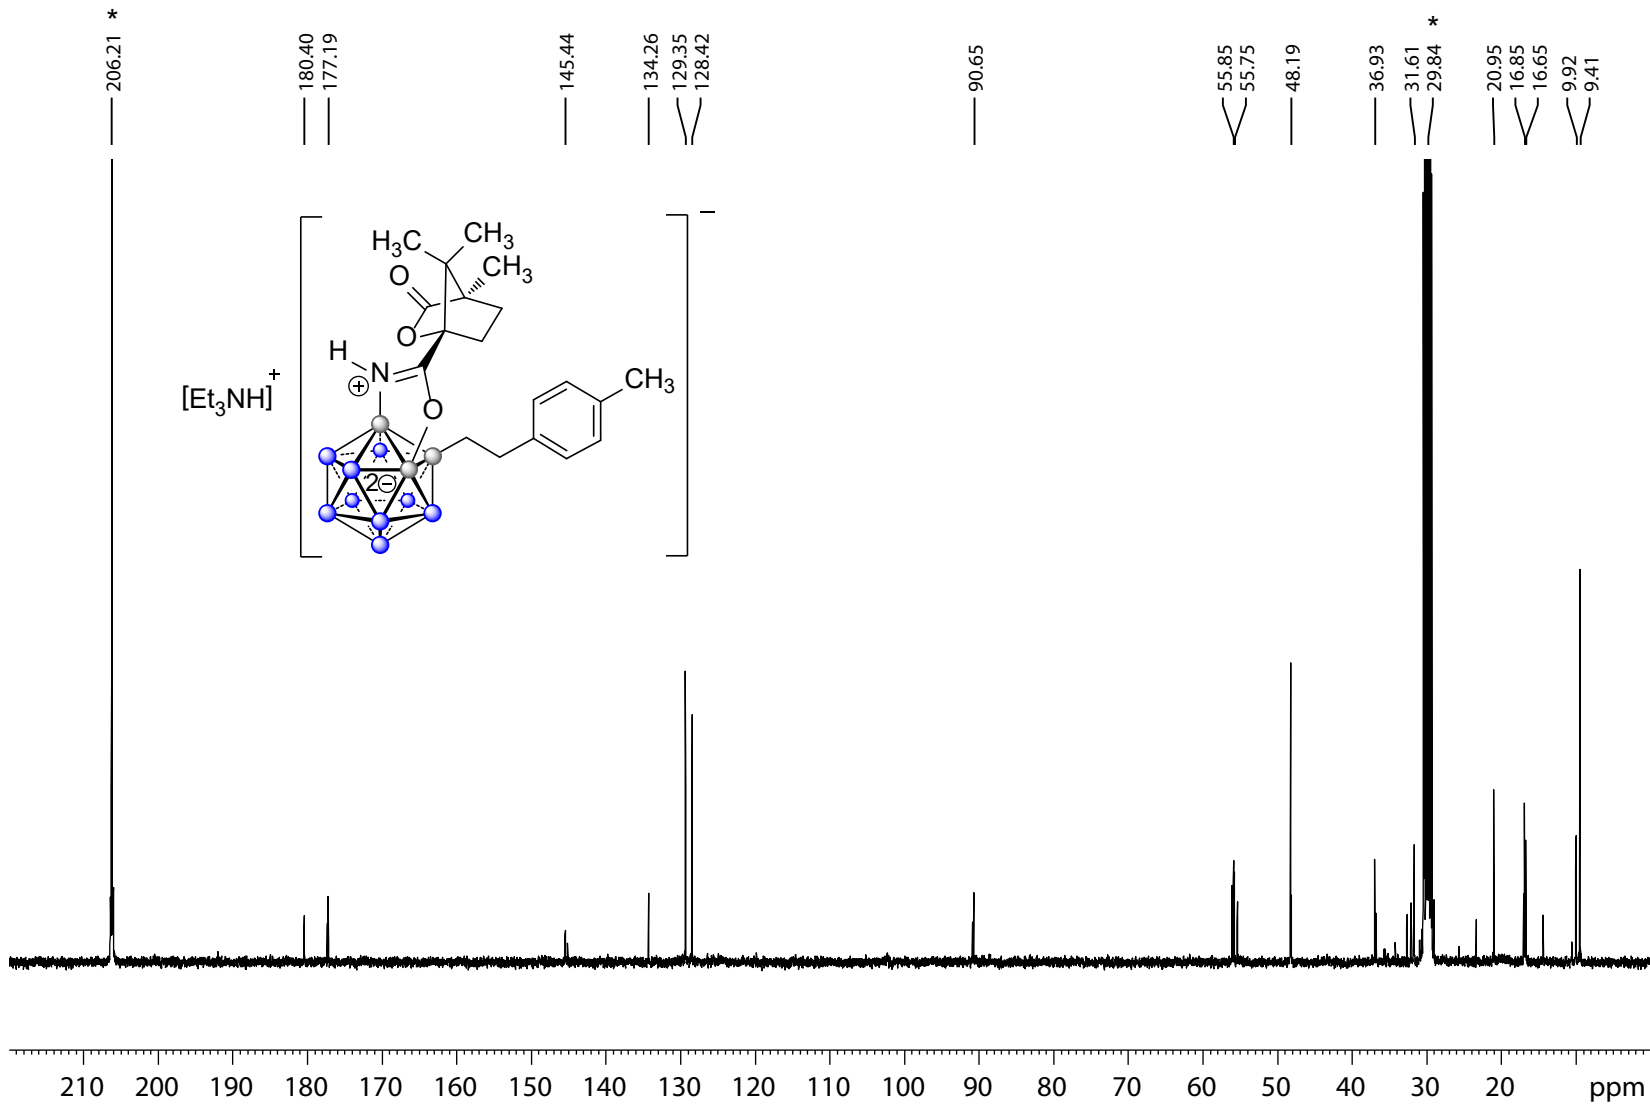

Current Data Parameters  
 NAME 20190729-B12C-4MeSTYR  
 EXPNO 5  
 PROCNO 1

F2 - Acquisition Parameters  
 Date\_ 20190730  
 Time\_ 13.20  
 INSTRUM spect  
 PROBHD 5 mm PABBO BB/  
 PULPROG zgpg30  
 TD 65536  
 SOLVENT Acetone  
 NS 2048  
 DS 4  
 SWH 29761.904 Hz  
 FIDRES 0.454131 Hz  
 AQ 1.1010048 sec  
 RG 193.34  
 DW 16.800 usec  
 DE 6.50 usec  
 TE 295.7 K  
 D1 1.50000000 sec  
 D11 0.03000000 sec  
 TD0 1

==== CHANNEL f1 =====  
 NUC1 13C  
 P1 10.00 usec  
 PLW1 53.00000000 W  
 SFO1 100.6228293 MHz

==== CHANNEL f2 =====  
 CPDPRG[2] waltz16  
 NUC2 1H  
 PCPD2 80.00 usec  
 PLW2 12.50000000 W  
 PLW12 0.43945000 W  
 PLW13 0.28125000 W  
 SFO2 400.1316005 MHz

F2 - Processing parameters  
 SI 32768  
 SF 100.6126831 MHz  
 WDW EM  
 SSB 0  
 LB 1.00 Hz  
 GB 0  
 PC 1.40

20190729-B12C-4MeSTYR 20 mg white solid [Et<sub>3</sub>NH][B<sub>12</sub>H<sub>10</sub>NHCO(Camphanic)CH<sub>2</sub>CH<sub>2</sub>C<sub>6</sub>H<sub>4</sub>-4Me] dissolved in 0.6 mL acetone-d<sub>6</sub>\*

<sup>13</sup>CDEPT NMR 100 MHz

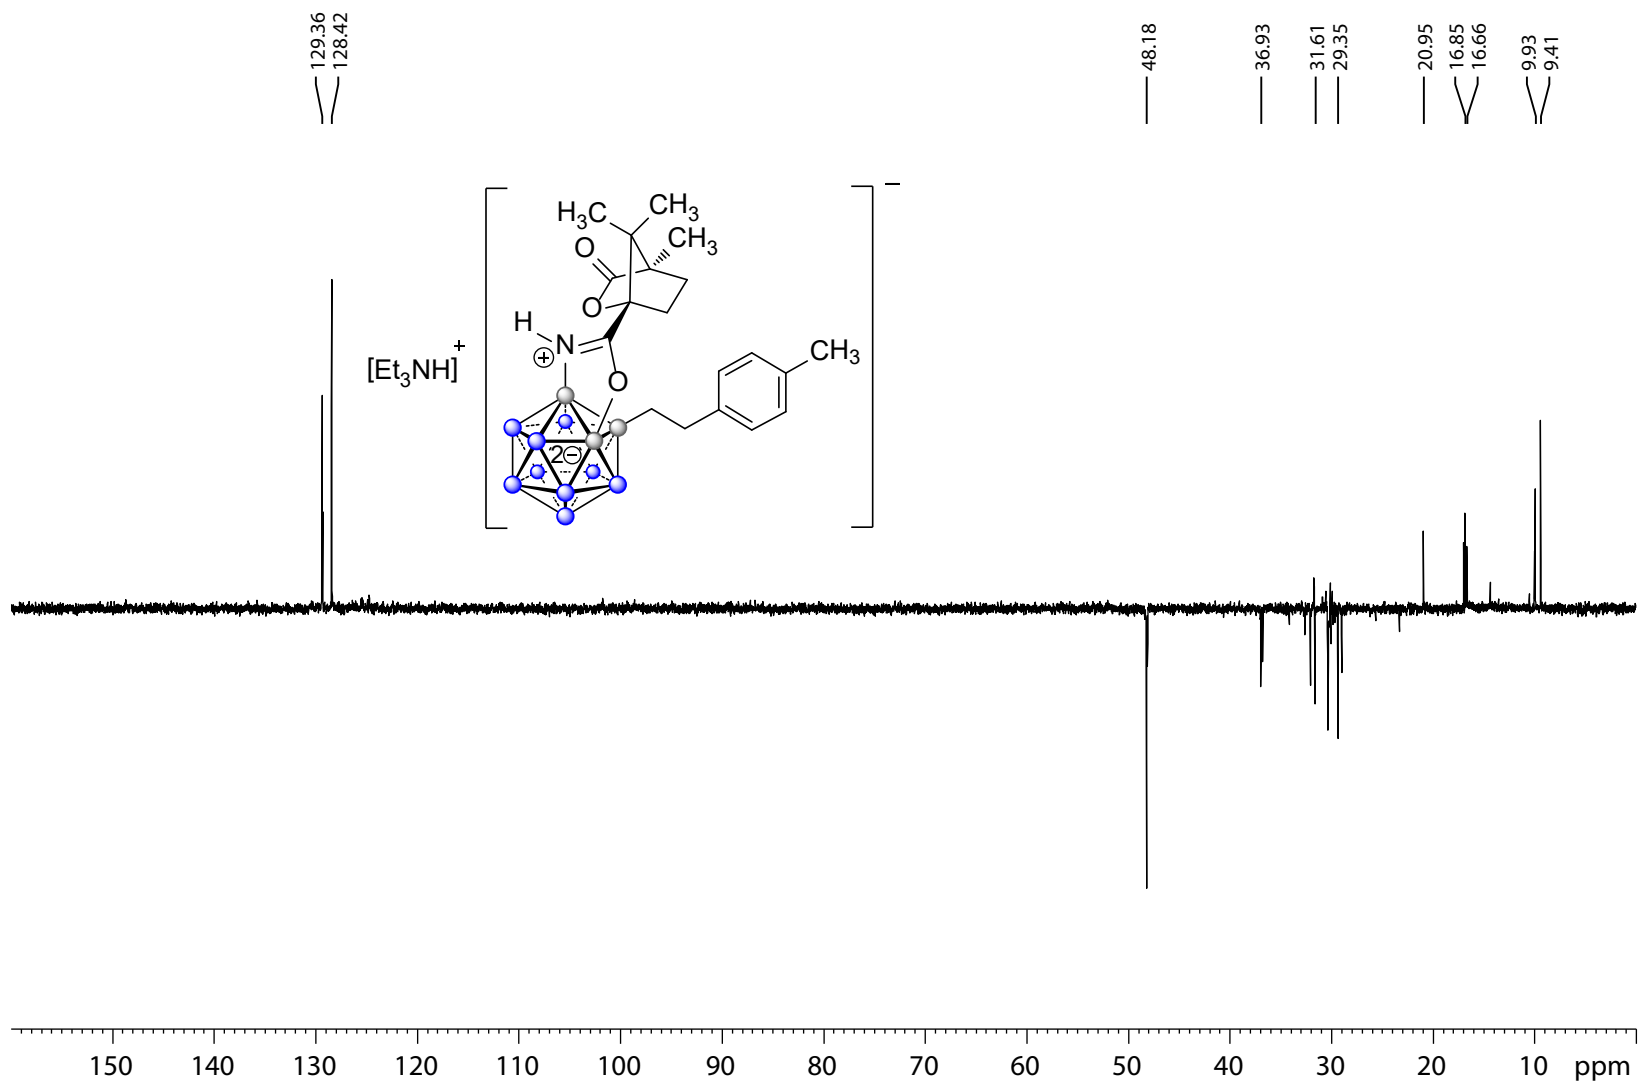

Current Data Parameters  
 NAME 20190729-B12C-4MeSTYR  
 EXPNO 6  
 PROCNO 1

F2 - Acquisition Parameters  
 Date\_ 20190730  
 Time\_ 13.48  
 INSTRUM spect  
 PROBHD 5 mm PABBO BB/  
 PULPROG dept135  
 TD 65536  
 SOLVENT Acetone  
 NS 512  
 DS 4  
 SWH 29296.875 Hz  
 FIDRES 0.447035 Hz  
 AQ 1.1184810 sec  
 RG 193.34  
 DW 17.067 usec  
 DE 6.50 usec  
 TE 295.5 K  
 CNST2 145.0000000  
 D1 2.00000000 sec  
 D2 0.0034828 sec  
 D12 0.00002000 sec  
 TD0 1

==== CHANNEL f1 =====  
 NUC1 13C  
 P1 10.00 usec  
 P2 20.00 usec  
 PLW1 53.00000000 W  
 SFO1 100.6228293 MHz

==== CHANNEL f2 =====  
 CPDPRG[2] waltz16  
 NUC2 1H  
 P3 15.00 usec  
 P4 30.00 usec  
 PCPD2 80.00 usec  
 PLW2 12.50000000 W  
 PLW12 0.43945000 W  
 SFO2 400.1316005 MHz

F2 - Processing parameters  
 SI 32768  
 SF 100.6126830 MHz  
 WDW EM  
 SSB 0  
 LB 1.00 Hz  
 GB 0  
 PC 4.00

20190729-B12C-4MeSTYR 20 mg white solid [Et<sub>3</sub>NH][B<sub>12</sub>H<sub>10</sub>NHCO(Camphanic)CH<sub>2</sub>CH<sub>2</sub>C<sub>6</sub>H<sub>4</sub>-4Me] dissolved in 0.6 mL acetone-d<sub>6</sub>\*

<sup>1</sup>H - <sup>1</sup>H COSY NMR

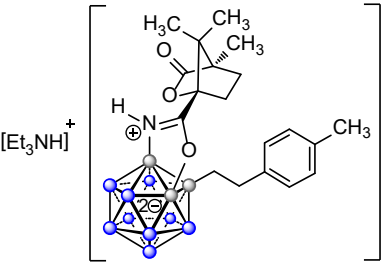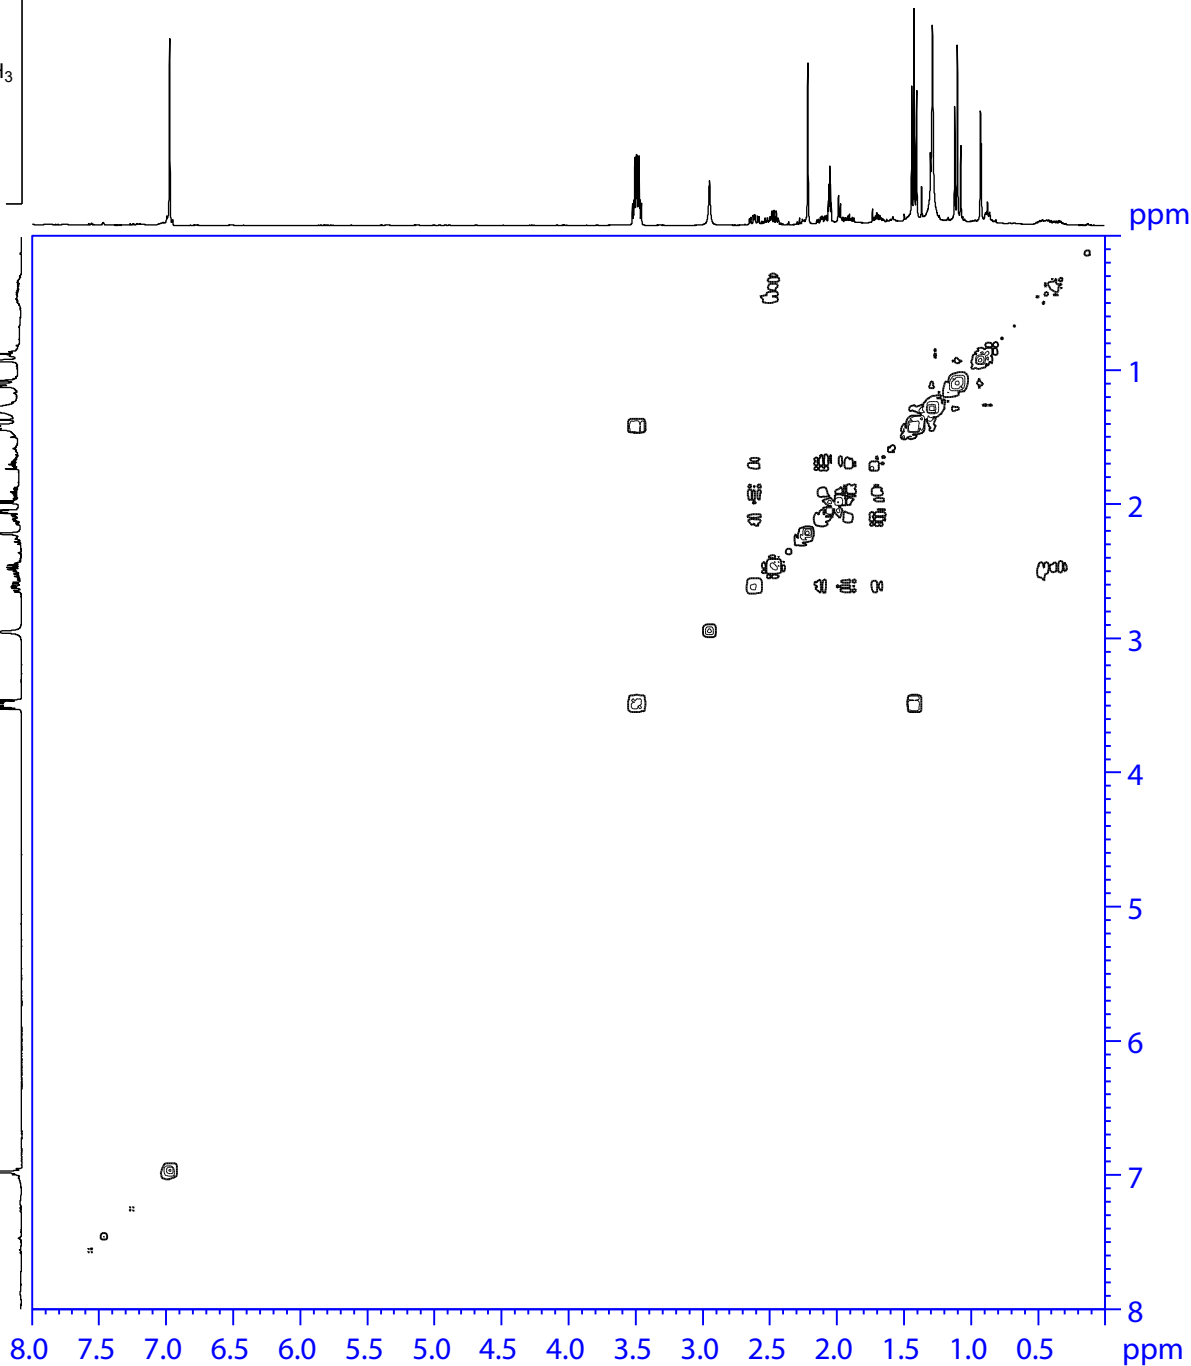

Current Data Parameters  
NAME 20190729-B12C-4MeSTYR  
EXPNO 7  
PROCNO 1

F2 - Acquisition Parameters  
Date\_ 20190730  
Time 13.49  
INSTRUM spect  
PROBHD 5 mm PABBO BB/  
PULPROG cosygpppqf  
TD 2048  
SOLVENT Acetone  
NS 2  
DS 8  
SWH 5341.880 Hz  
FIDRES 2.608340 Hz  
AQ 0.1916928 sec  
RG 138.32  
DW 93.600 usec  
DE 6.50 usec  
TE 295.2 K  
D0 0.0000300 sec  
D1 2.0000000 sec  
D11 0.03000000 sec  
D12 0.00002000 sec  
D13 0.00000400 sec  
D16 0.00020000 sec  
IN0 0.00018720 sec

===== CHANNEL f1 =====  
NUC1 1H  
P0 15.00 usec  
P1 15.00 usec  
P17 2500.00 usec  
PLW1 12.5000000 W  
PLW10 4.16050005 W  
SFO1 400.1324057 MHz

===== GRADIENT CHANNEL =====  
GPNAM[1] SMSQ10.100  
GPZ1 10.00 %  
P16 1000.00 usec

F1 - Acquisition parameters  
TD 128  
SFO1 400.1324 MHz  
FIDRES 83.466881 Hz  
SW 13.350 ppm  
FnMODE QF

F2 - Processing parameters  
SI 1024  
SF 400.1300082 MHz  
WDW QSINE  
SSB 0  
LB 0 Hz  
GB 0  
PC 1.40

F1 - Processing parameters  
SI 1024  
MC2 QF  
SF 400.1300082 MHz  
WDW QSINE  
SSB 0  
LB 0 Hz  
GB 0



20190729-B12C-4MeSTYR 20 mg white solid [Et<sub>3</sub>NH][B<sub>12</sub>H<sub>10</sub>NHCO(Camphanic)CH<sub>2</sub>CH<sub>2</sub>C<sub>6</sub>H<sub>4</sub>-4Me] dissolved in 0.6 mL acetone-d<sub>6</sub>\*

<sup>1</sup>H - <sup>13</sup>C HSQC NMR

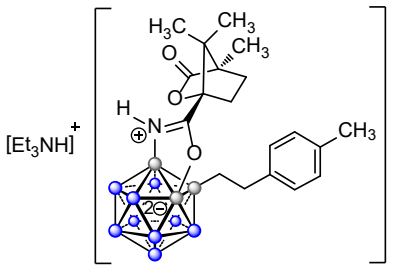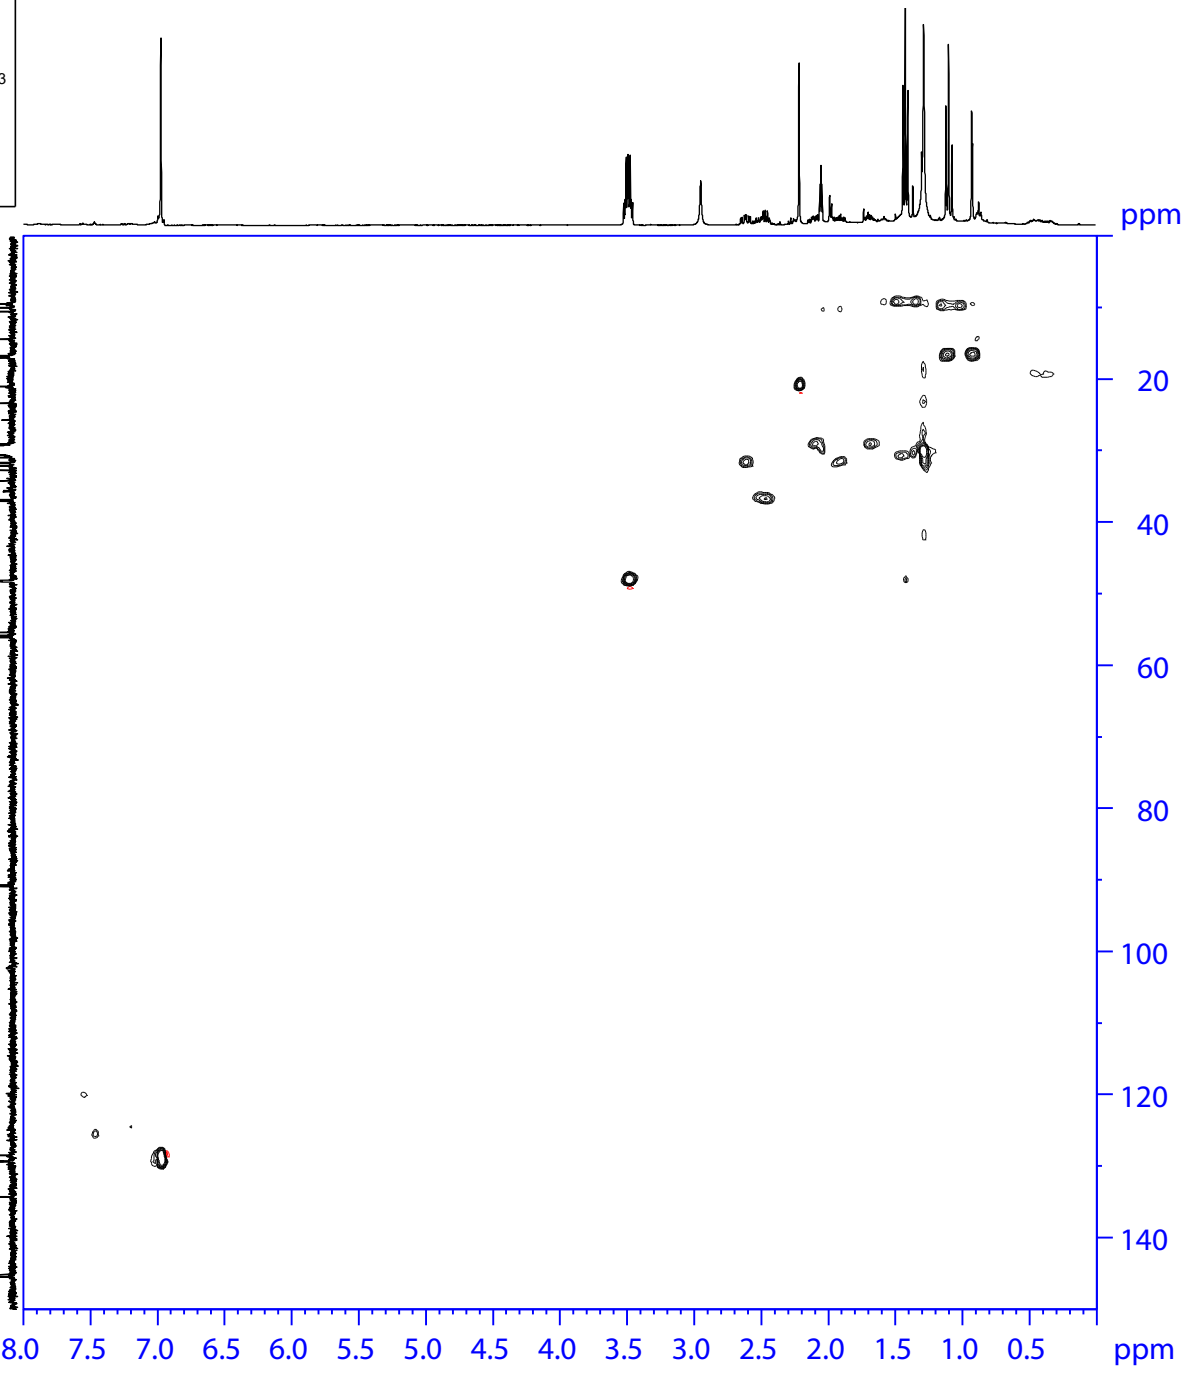

Current Data Parameters  
 NAME 20190729-B12C-4MeSTYR  
 EXPNO 8  
 PROCNO 1

F2 - Acquisition Parameters  
 Date\_ 20190730  
 Time 14.00  
 INSTRUM spect  
 PROBHD 5 mm PABBO BB/  
 PULPROG hsqcetgpsiz  
 TD 1024  
 SOLVENT Acetone  
 NS 2  
 DS 16  
 SWH 6009.615 Hz  
 FIDRES 5.868765 Hz  
 AQ 0.0851968 sec  
 RG 193.34  
 DW 83.200 usec  
 DE 6.50 usec  
 TE 295.1 K  
 CNST2 145.0000000  
 D0 0.00000300 sec  
 D1 1.50000000 sec  
 D4 0.00172414 sec  
 D11 0.03000000 sec  
 D16 0.00020000 sec  
 D24 0.00086207 sec  
 INO 0.00001990 sec  
 ZGOPTNS

==== CHANNEL f1 =====  
 NUC1 1H  
 P1 15.00 usec  
 P2 30.00 usec  
 P28 1000.00 usec  
 PLW1 12.50000000 W  
 SFO1 400.1328009 MHz

==== CHANNEL f2 =====  
 CPDPRG2 garp  
 NUC2 13C  
 P3 10.00 usec  
 P4 20.00 usec  
 PCPD2 70.00 usec  
 PLW2 53.00000000 W  
 PLW12 1.08159995 W  
 SFO2 100.6238364 MHz

==== GRADIENT CHANNEL =====  
 GPNAM[1] SMSQ10.100  
 GPNAM[2] SMSQ10.100  
 GPNAM[3] SMSQ10.100  
 GPNAM[4] SMSQ10.100  
 GPZ1 80.00 %  
 GPZ2 20.10 %  
 GPZ3 11.00 %  
 GPZ4 -5.00 %  
 P16 1000.00 usec  
 P19 600.00 usec

F1 - Acquisition parameters  
 TD 256  
 SFO1 100.6238 MHz  
 FIDRES 196.524048 Hz  
 SW 249.991 ppm  
 FwMODE Echo-Antiecho

F2 - Processing parameters  
 SI 1024  
 SF 400.1300079 MHz  
 WDW QSINE  
 SSB 2  
 LB 0 Hz  
 GB 0  
 PC 1.40

F1 - Processing parameters  
 SI 1024  
 MC2 echo-antiecho  
 SF 100.6126742 MHz  
 WDW QSINE  
 SSB 2  
 LB 0 Hz  
 GB 0

20191213-B12C-4COOMeSTYR 20 mg white solid  $[\text{Et}_3\text{NH}][\text{B}_{12}\text{H}_{10}\text{NHCO}(\text{Camphanic})\text{CH}_2\text{CH}_2\text{C}_6\text{H}_4\text{-4COOMe}]$  dissolved in 0.6 mL acetone- $d_6^*$   
 400MHz  $^1\text{H}$  NMR,  $\circ$  deuterated solvent residual peak= 2.05 ppm;  $\diamond$  water peak

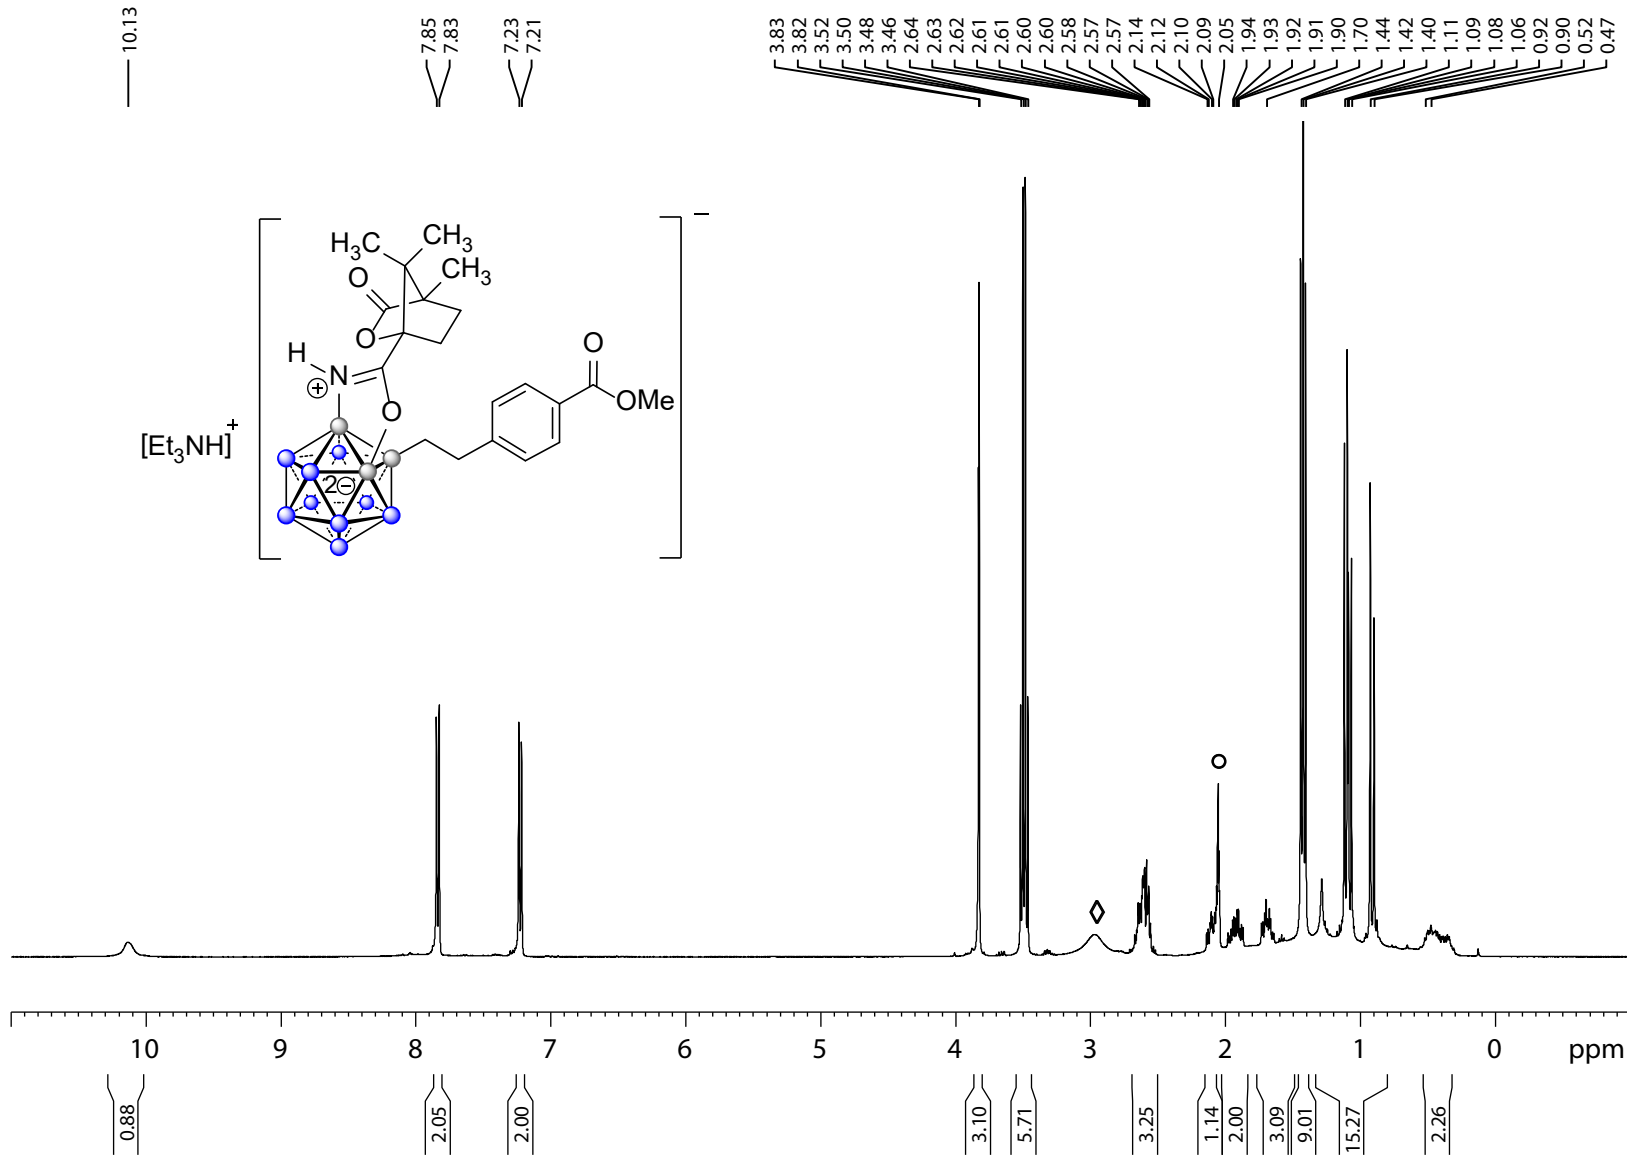

Current Data Parameters  
 NAME 20191213-RV-B12C-4COOMeStyr  
 EXPNO 1  
 PROCNO 1

F2 - Acquisition Parameters  
 Date\_ 20191214  
 Time 13.37  
 INSTRUM spect  
 PROBHD 5 mm PABBO BB/  
 PULPROG zg30  
 TD 65536  
 SOLVENT Acetone  
 NS 16  
 DS 2  
 SWH 10000.000 Hz  
 FIDRES 0.152588 Hz  
 AQ 3.2767999 sec  
 RG 86.58  
 DW 50.000 usec  
 DE 6.50 usec  
 TE 295.2 K  
 D1 1.00000000 sec  
 TD0 1

===== CHANNEL f1 =====  
 NUC1  $^1\text{H}$   
 P1 15.00 usec  
 PLW1 12.50000000 W  
 SFO1 400.1328009 MHz

F2 - Processing parameters  
 SI 65536  
 SF 400.1300075 MHz  
 WDW EM  
 SSB 0  
 LB 0.30 Hz  
 GB 0  
 PC 1.00

20191213-B12C-4COOMeSTYR 20 mg white solid  $[\text{Et}_3\text{NH}][\text{B}_{12}\text{H}_{10}\text{NHCO}(\text{Camphanic})\text{CH}_2\text{CH}_2\text{C}_6\text{H}_4\text{-4COOMe}]$  dissolved in 0.6 mL acetone- $d_6^*$

400MHz  $^1\text{H}\{\text{B}\}$  NMR,  $\circ$  deuterated solvent residual peak= 2.05 ppm;  $\diamond$  water peak

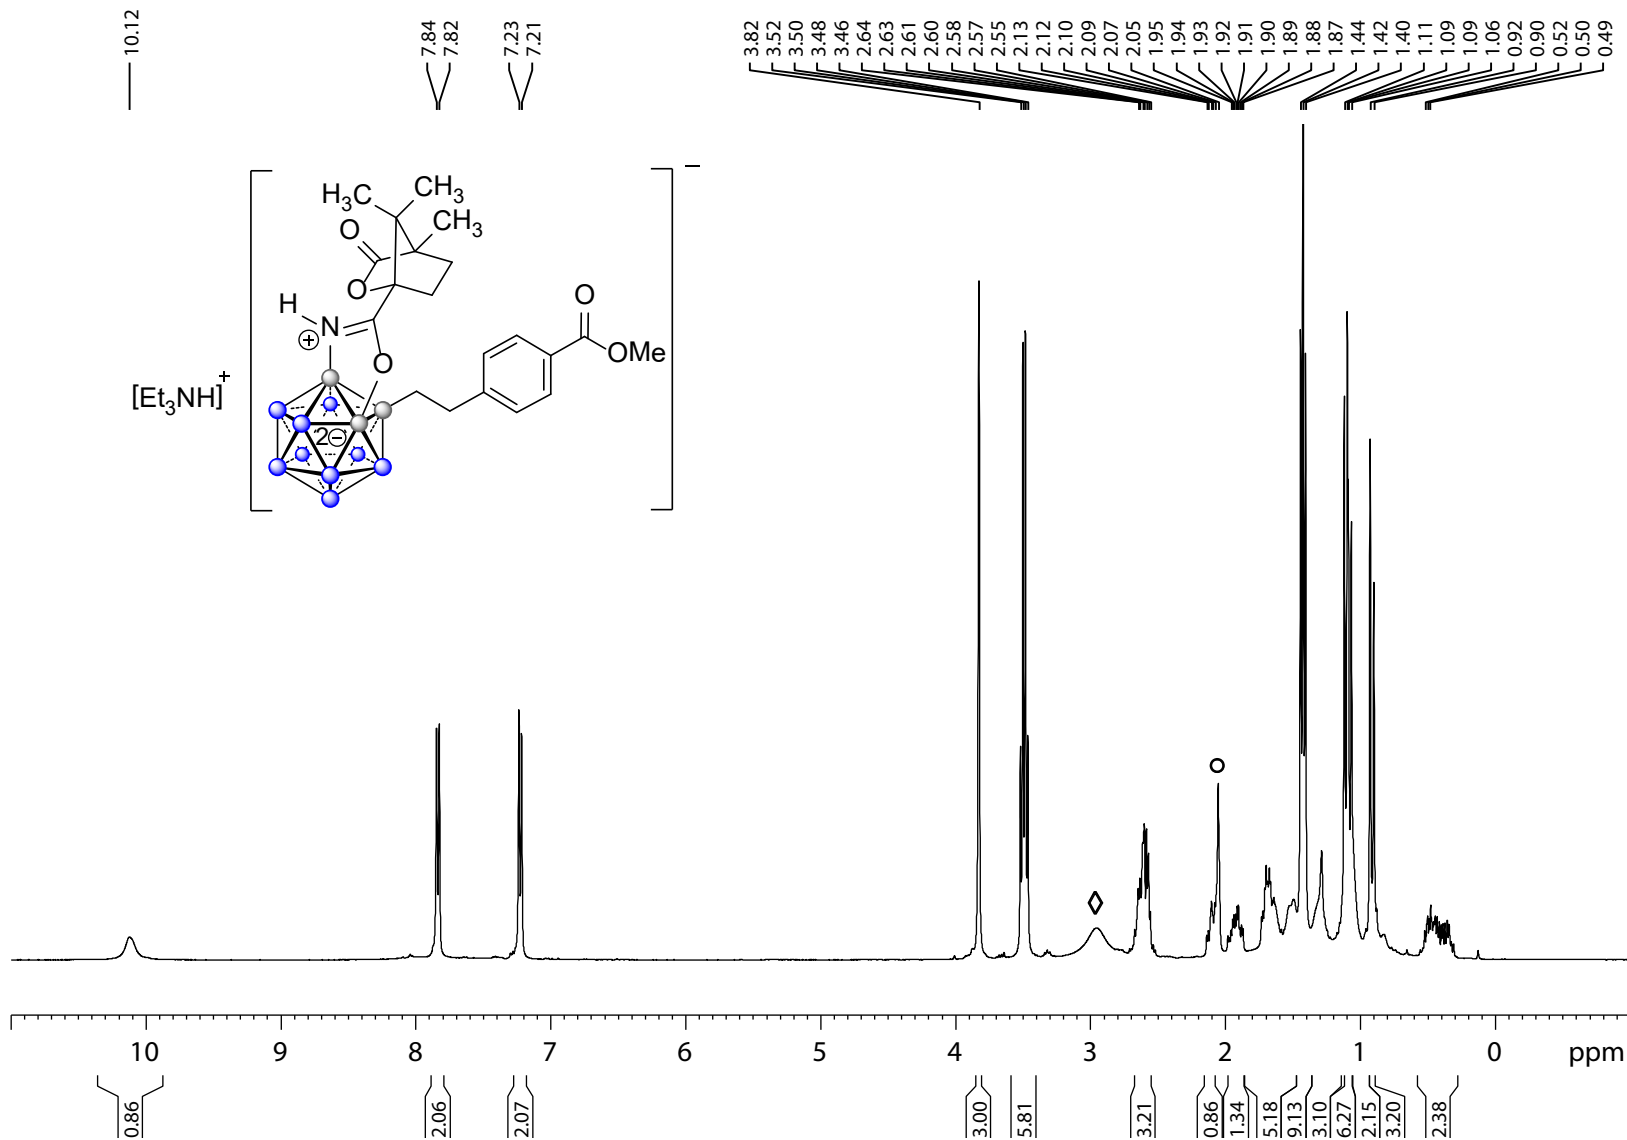

Current Data Parameters  
 NAME 20191213-RV-B12C-4COOMeStyr  
 EXPNO 2  
 PROCNO 1

F2 - Acquisition Parameters  
 Date\_ 20191214  
 Time 13.39  
 INSTRUM spect  
 PROBHD 5 mm PABBO BB/  
 PULPROG zgig30  
 TD 16384  
 SOLVENT Acetone  
 NS 16  
 DS 4  
 SWH 8012.820 Hz  
 FIDRES 0.489064 Hz  
 AQ 1.0223616 sec  
 RG 86.58  
 DW 62.400 usec  
 DE 6.50 usec  
 TE 295.4 K  
 D1 1.00000000 sec  
 D11 0.03000000 sec  
 TD0 1

==== CHANNEL f1 =====  
 NUC1 1H  
 P1 15.00 usec  
 PLW1 12.50000000 W  
 SFO1 400.1320007 MHz

==== CHANNEL f2 =====  
 CPDPRG2 garp4  
 NUC2 11B  
 PCPD2 90.00 usec  
 PLW2 52.96599960 W  
 PLW12 0.64477998 W  
 SFO2 128.3776050 MHz

F2 - Processing parameters  
 SI 32768  
 SF 400.1300079 MHz  
 WDW EM  
 SSB 0  
 LB 1.00 Hz  
 GB 0  
 PC 1.40

20191213-B12C-4COOMeSTYR 20 mg white solid  $[\text{Et}_3\text{NH}][\text{B}_{12}\text{H}_{10}\text{NHCO}(\text{Camphanic})\text{CH}_2\text{CH}_2\text{C}_6\text{H}_4\text{-4COOMe}]$  dissolved in 0.6 mL acetone- $d_6^*$

$^{11}\text{B}$  NMR 128 MHz

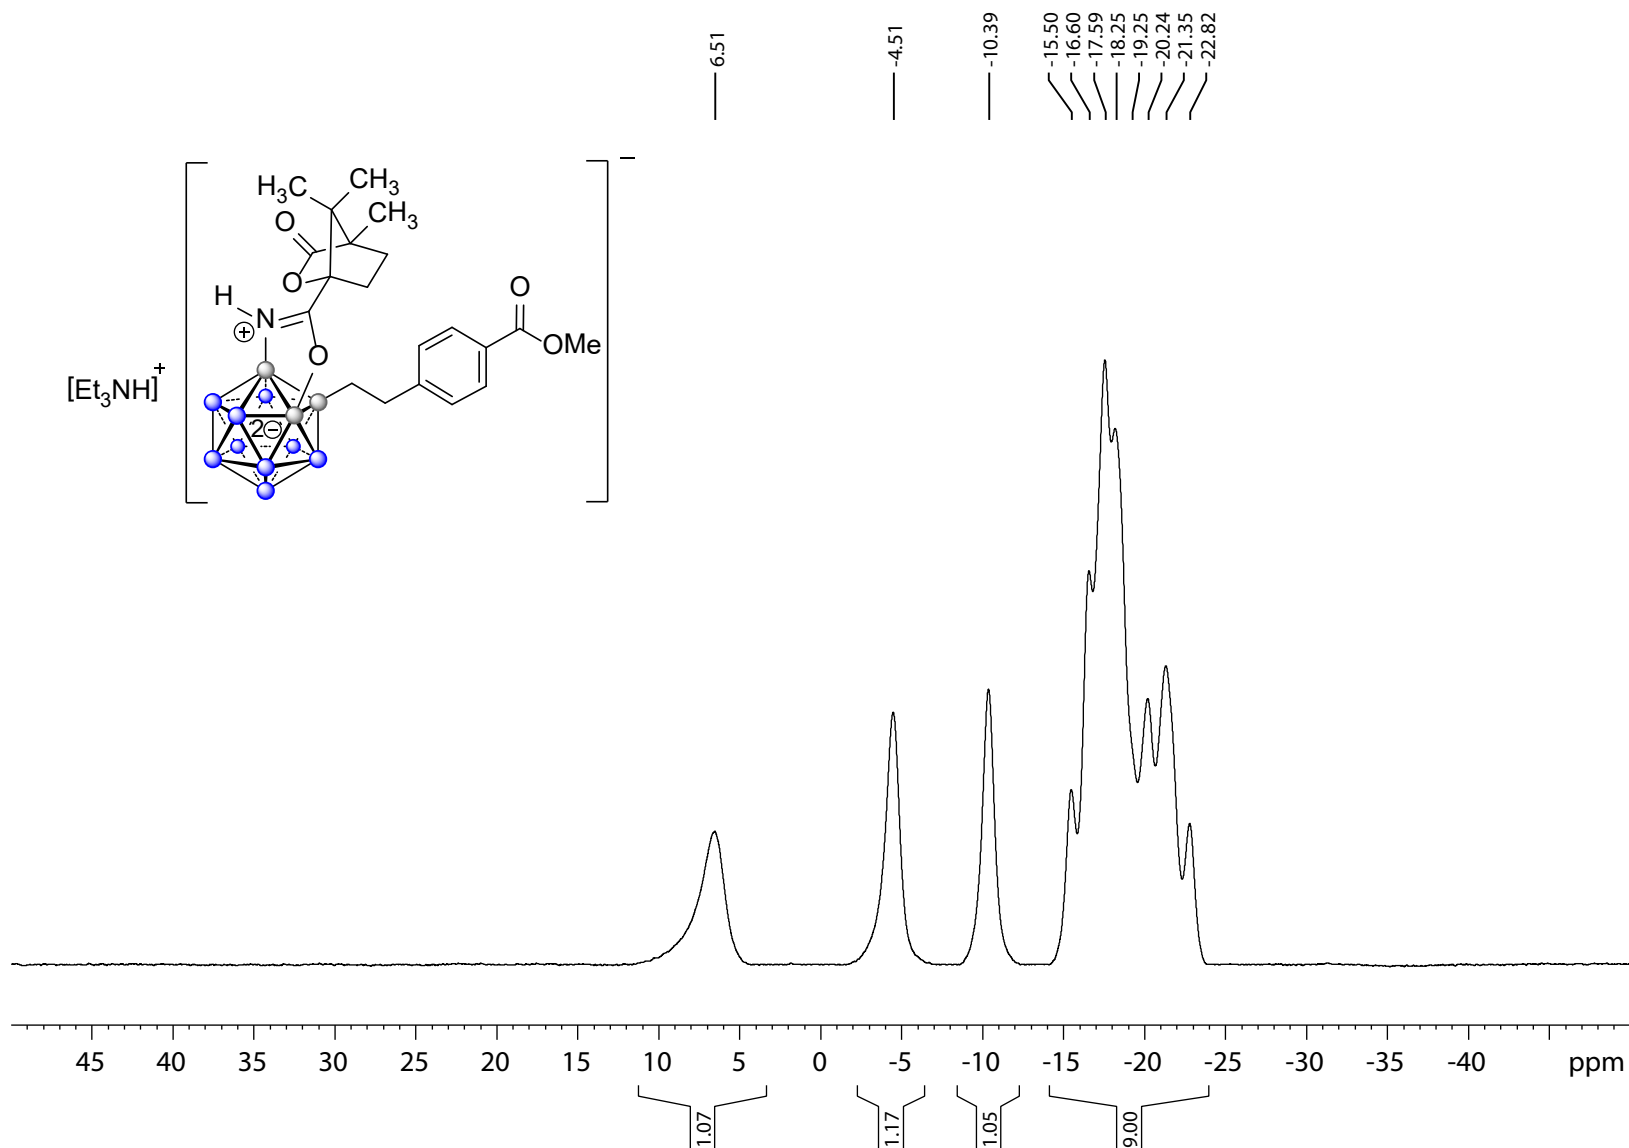

Current Data Parameters  
NAME 20191213-RV-B12C-4COOMeStyr  
EXPNO 3  
PROCNO 1

F2 - Acquisition Parameters  
Date\_ 20191214  
Time 13.45  
INSTRUM spect  
PROBHD 5 mm PABBO BB/  
PULPROG zg  
TD 65536  
SOLVENT Acetone  
NS 128  
DS 4  
SWH 25510.203 Hz  
FIDRES 0.389255 Hz  
AQ 1.2845056 sec  
RG 193.34  
DW 19.600 usec  
DE 6.50 usec  
TE 295.1 K  
D1 1.0000000 sec  
TD0 1

===== CHANNEL f1 =====  
NUC1 11B  
P1 9.93 usec  
PLW1 52.96599960 W  
SFO1 128.3776052 MHz

F2 - Processing parameters  
SI 32768  
SF 128.3776050 MHz  
WDW EM  
SSB 0  
LB 10.00 Hz  
GB 0  
PC 1.40

NMR-034

20191213-B12C-4COOMeSTYR 20 mg white solid  $[\text{Et}_3\text{NH}][\text{B}_{12}\text{H}_{10}\text{NHCO}(\text{Camphanic})\text{CH}_2\text{CH}_2\text{C}_6\text{H}_4\text{-4COOMe}]$  dissolved in 0.6 mL acetone- $d_6^*$

$^{11}\text{B}\{\text{H}\}$  NMR 128 MHz

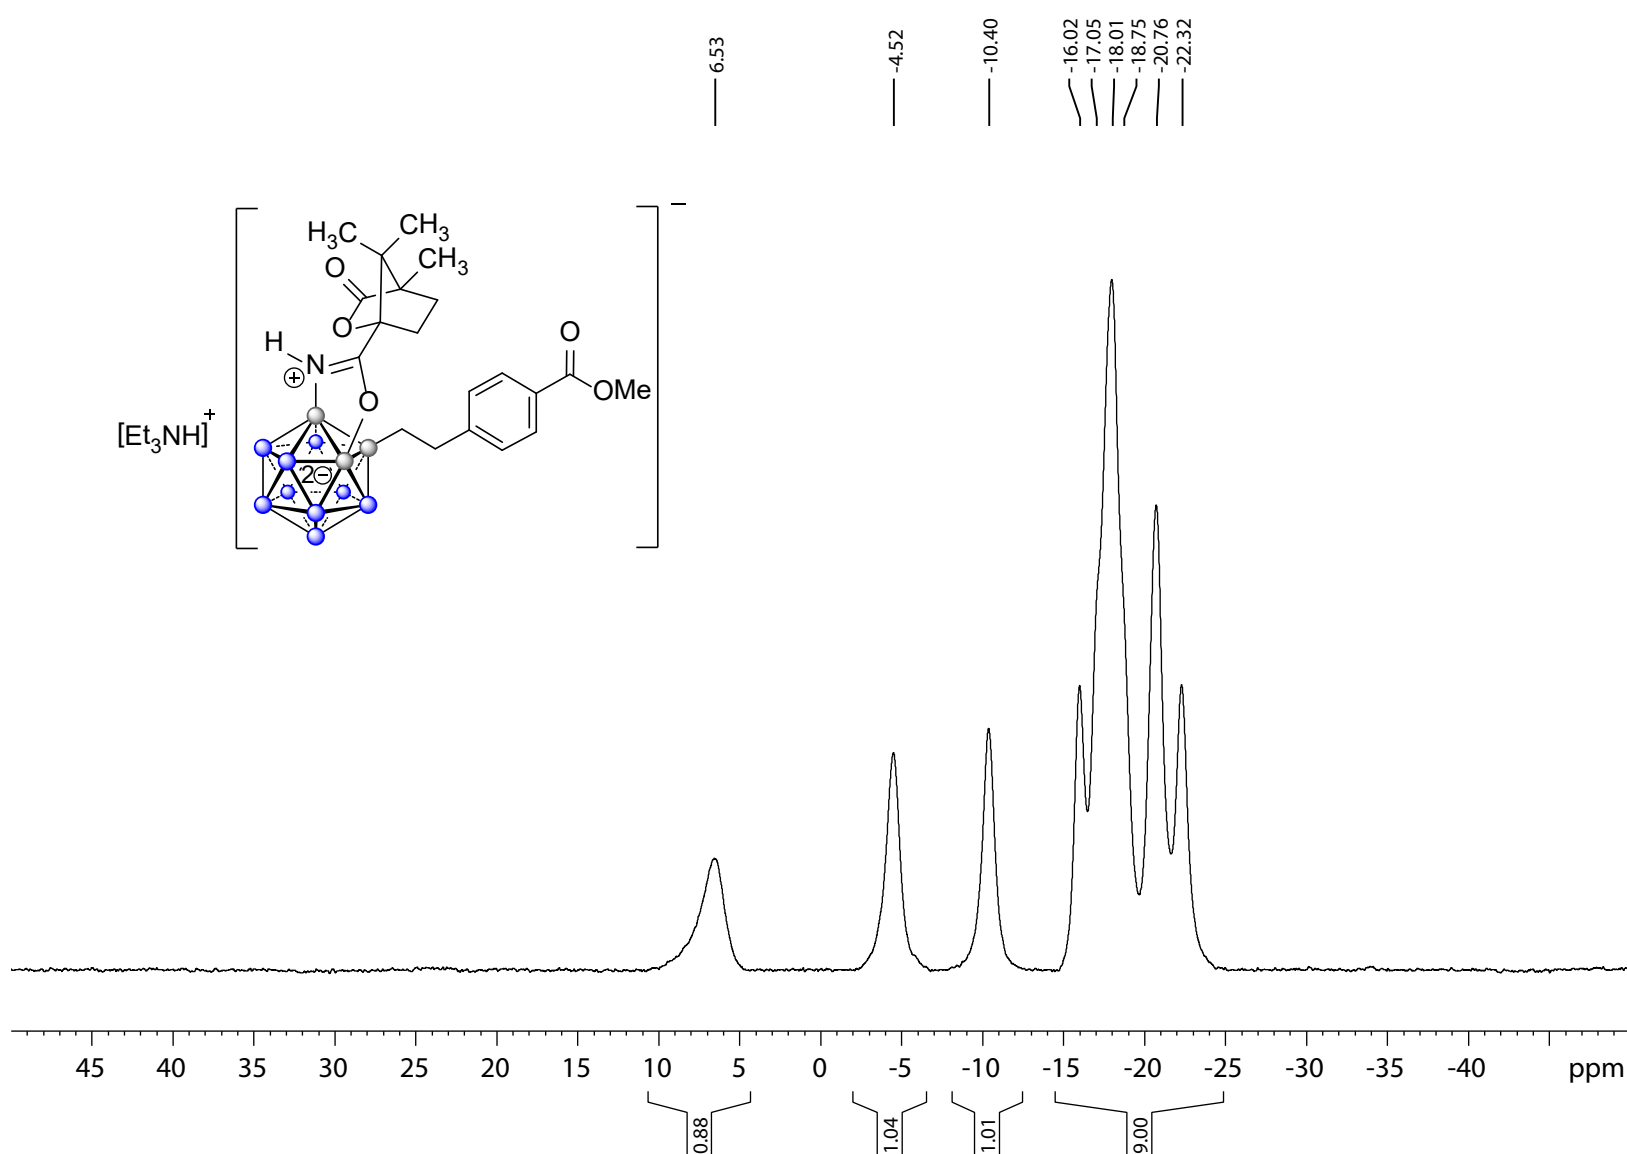

Current Data Parameters  
NAME 20191213-RV-B12C-4COOMeStyr  
EXPNO 4  
PROCNO 1

F2 - Acquisition Parameters  
Date\_ 20191214  
Time 13.51  
INSTRUM spect  
PROBHD 5 mm PABBO BB/  
PULPROG zgpg30  
TD 65536  
SOLVENT Acetone  
NS 128  
DS 4  
SWH 25510.203 Hz  
FIDRES 0.389255 Hz  
AQ 1.2845056 sec  
RG 193.34  
DW 19.600 usec  
DE 6.50 usec  
TE 295.9 K  
D1 1.00000000 sec  
D11 0.03000000 sec  
TD0 1

===== CHANNEL f1 =====  
NUC1 11B  
P1 9.93 usec  
PLW1 52.96599960 W  
SFO1 128.3776050 MHz

===== CHANNEL f2 =====  
CPDPRG2 waltz16  
NUC2 1H  
PCPD2 80.00 usec  
PLW2 12.50000000 W  
PLW12 0.43945000 W  
PLW13 0.28125000 W  
SFO2 400.1320007 MHz

F2 - Processing parameters  
SI 32768  
SF 128.3776050 MHz  
WDW EM  
SSB 0  
LB 10.00 Hz  
GB 0  
PC 1.40

NMR-035

20191213-B12C-4COOMeSTYR 20 mg white solid  $[\text{Et}_3\text{NH}][\text{B}_{12}\text{H}_{10}\text{NHCO}(\text{Camphanic})\text{CH}_2\text{CH}_2\text{C}_6\text{H}_4\text{-4COOMe}]$  dissolved in 0.6 mL acetone- $d_6^*$

$^{13}\text{C}\{^1\text{H}\}$  NMR 100 MHz

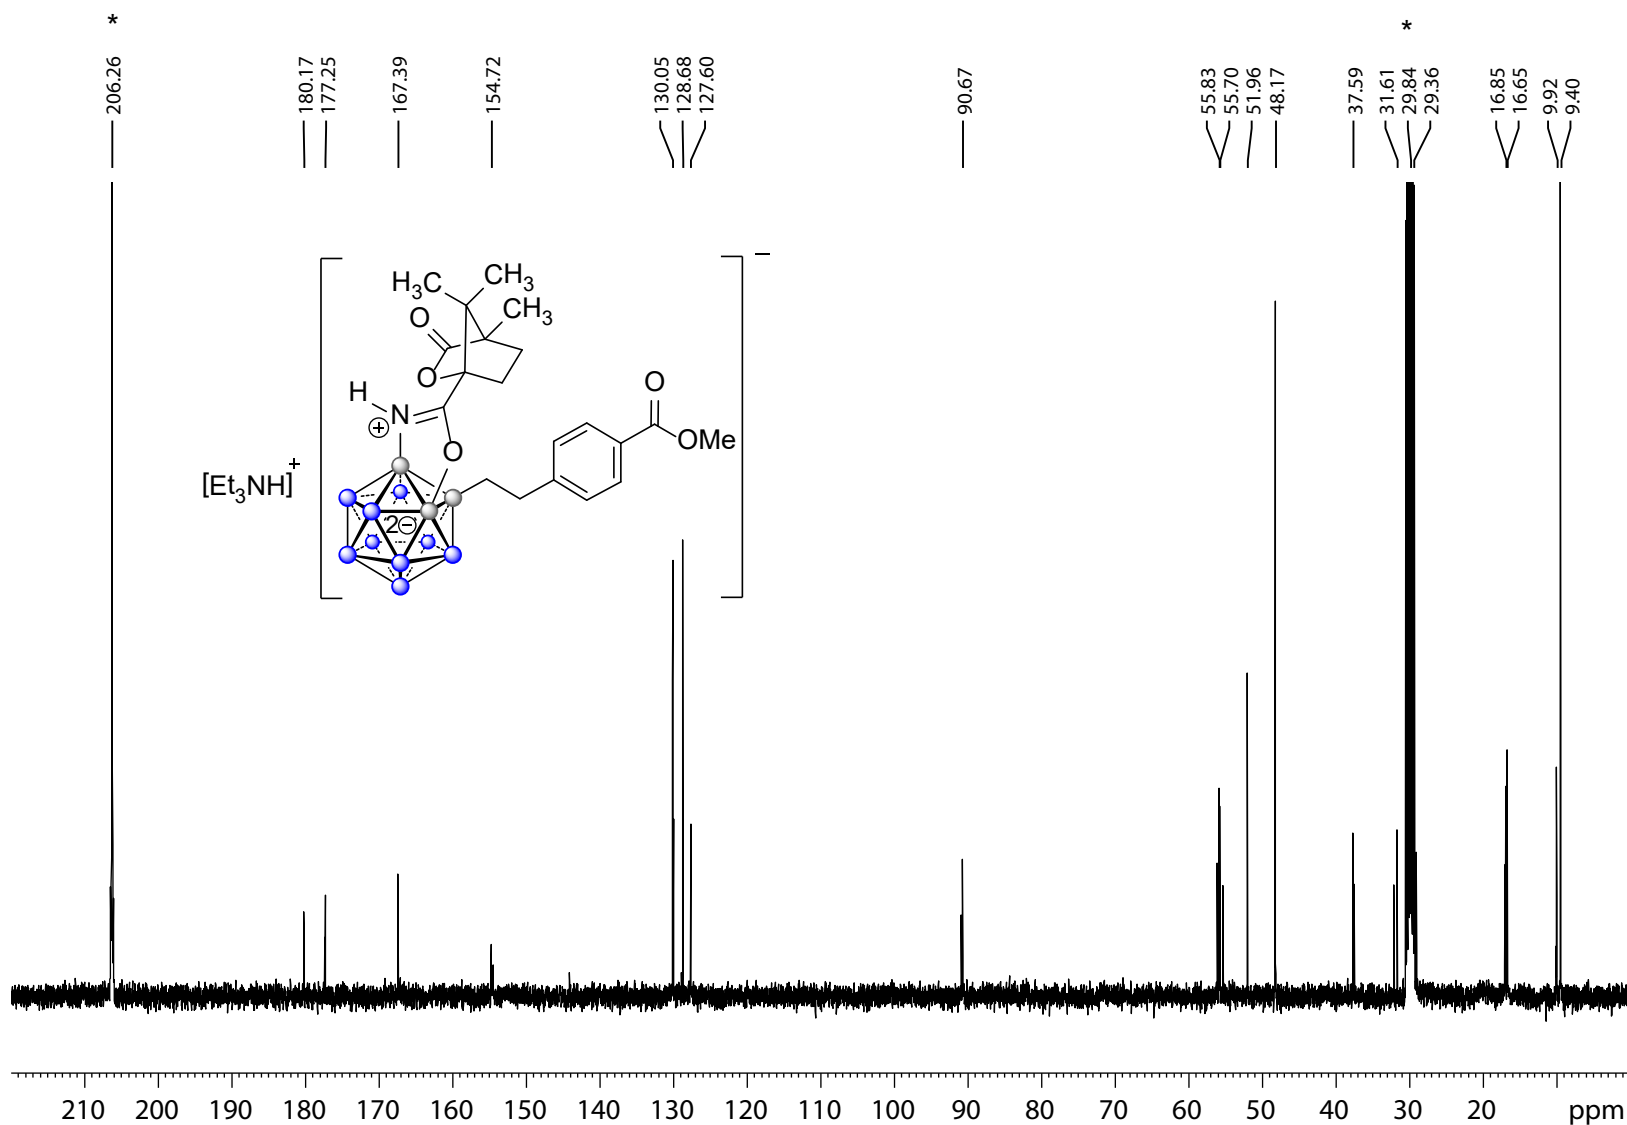

Current Data Parameters  
 NAME 20191213-RV-B12C-4COOMeStyr  
 EXPNO 5  
 PROCNO 1

F2 - Acquisition Parameters  
 Date\_ 20191214  
 Time 14.38  
 INSTRUM spect  
 PROBHD 5 mm PABBO BB/  
 PULPROG zgpg30  
 TD 65536  
 SOLVENT Acetone  
 NS 1024  
 DS 4  
 SWH 29761.904 Hz  
 FIDRES 0.454131 Hz  
 AQ 1.1010048 sec  
 RG 193.34  
 DW 16.800 usec  
 DE 6.50 usec  
 TE 295.9 K  
 D1 1.50000000 sec  
 D11 0.03000000 sec  
 TD0 1

===== CHANNEL f1 =====  
 NUC1  $^{13}\text{C}$   
 P1 10.00 usec  
 PLW1 53.00000000 W  
 SFO1 100.6228293 MHz

===== CHANNEL f2 =====  
 CPDPRG2 waltz16  
 NUC2  $^1\text{H}$   
 PCPD2 80.00 usec  
 PLW2 12.50000000 W  
 PLW12 0.43945000 W  
 PLW13 0.28125000 W  
 SFO2 400.1316005 MHz

F2 - Processing parameters  
 SI 32768  
 SF 100.6126830 MHz  
 WDW EM  
 SSB 0  
 LB 1.00 Hz  
 GB 0  
 PC 1.40

20191213-B12C-4COOMeSTYR 20 mg white solid  $[\text{Et}_3\text{NH}][\text{B}_{12}\text{H}_{10}\text{NHCO}(\text{Camphanic})\text{CH}_2\text{CH}_2\text{C}_6\text{H}_4\text{-4COOMe}]$  dissolved in 0.6 mL acetone- $d_6^*$

$^{13}\text{CDEPT}$  NMR 100 MHz

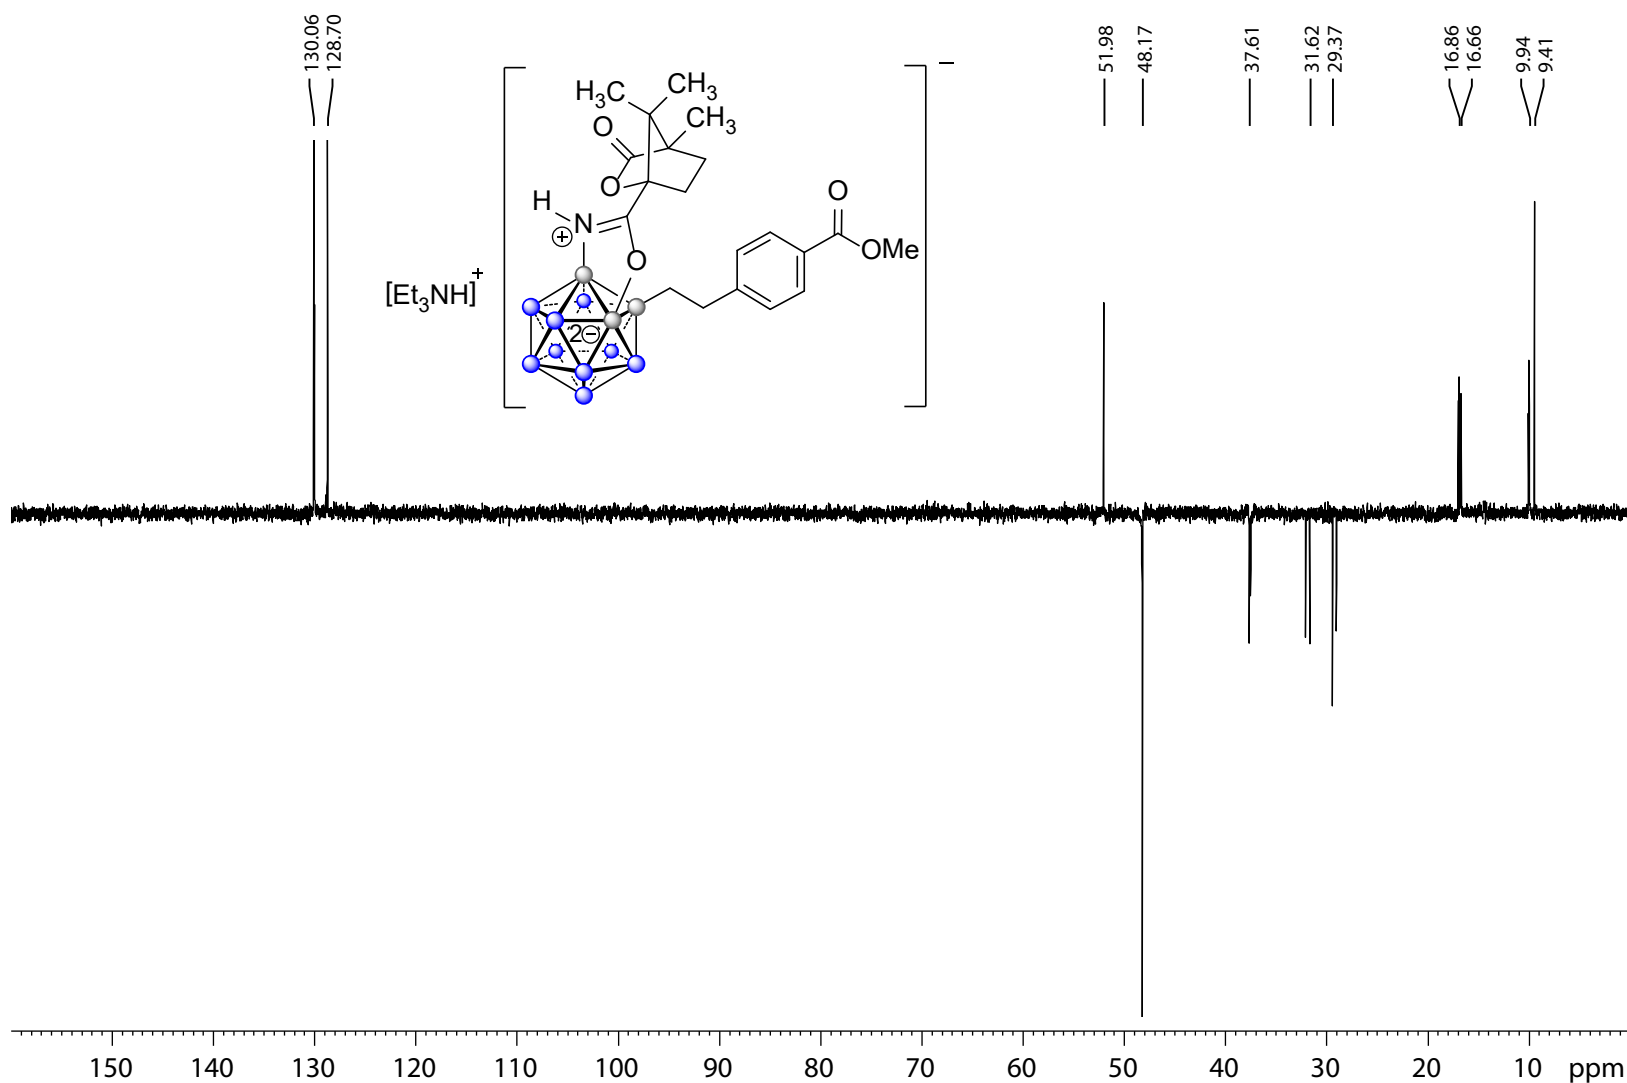

Current Data Parameters  
 NAME 20191213-RV-B12C-4COOMeStyr  
 EXPNO 6  
 PROCNO 1

F2 - Acquisition Parameters  
 Date\_ 20191214  
 Time 15.06  
 INSTRUM spect  
 PROBHD 5 mm PABBO BB/  
 PULPROG dept135  
 TD 65536  
 SOLVENT Acetone  
 NS 512  
 DS 4  
 SWH 29296.875 Hz  
 FIDRES 0.447035 Hz  
 AQ 1.1184810 sec  
 RG 193.34  
 DW 17.067 usec  
 DE 6.50 usec  
 TE 295.3 K  
 CNST2 145.0000000  
 D1 2.00000000 sec  
 D2 0.00344828 sec  
 D12 0.00002000 sec  
 TD0 1

===== CHANNEL f1 =====  
 NUC1  $^{13}\text{C}$   
 P1 10.00 usec  
 P2 20.00 usec  
 PLW1 53.00000000 W  
 SFO1 100.6228293 MHz

===== CHANNEL f2 =====  
 CPDPRG[2] waltz16  
 NUC2  $^1\text{H}$   
 P3 15.00 usec  
 P4 30.00 usec  
 PCPD2 80.00 usec  
 PLW2 12.50000000 W  
 PLW12 0.43945000 W  
 SFO2 400.1316005 MHz

F2 - Processing parameters  
 SI 32768  
 SF 100.6126819 MHz  
 WDW EM  
 SSB 0  
 LB 1.00 Hz  
 GB 0  
 PC 4.00

20191213-B12C-4COOMeSTYR 20 mg white solid  $[\text{Et}_3\text{NH}][\text{B}_{12}\text{H}_{10}\text{NHCO}(\text{Camphanic})\text{CH}_2\text{CH}_2\text{C}_6\text{H}_4\text{-4COOMe}]$  dissolved in 0.6 mL acetone- $d_6^*$

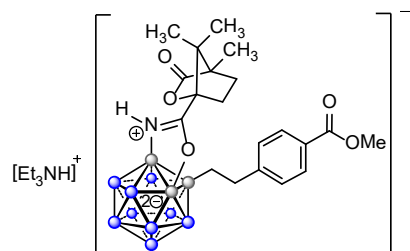

$^1\text{H} - ^1\text{H}$  COSY NMR

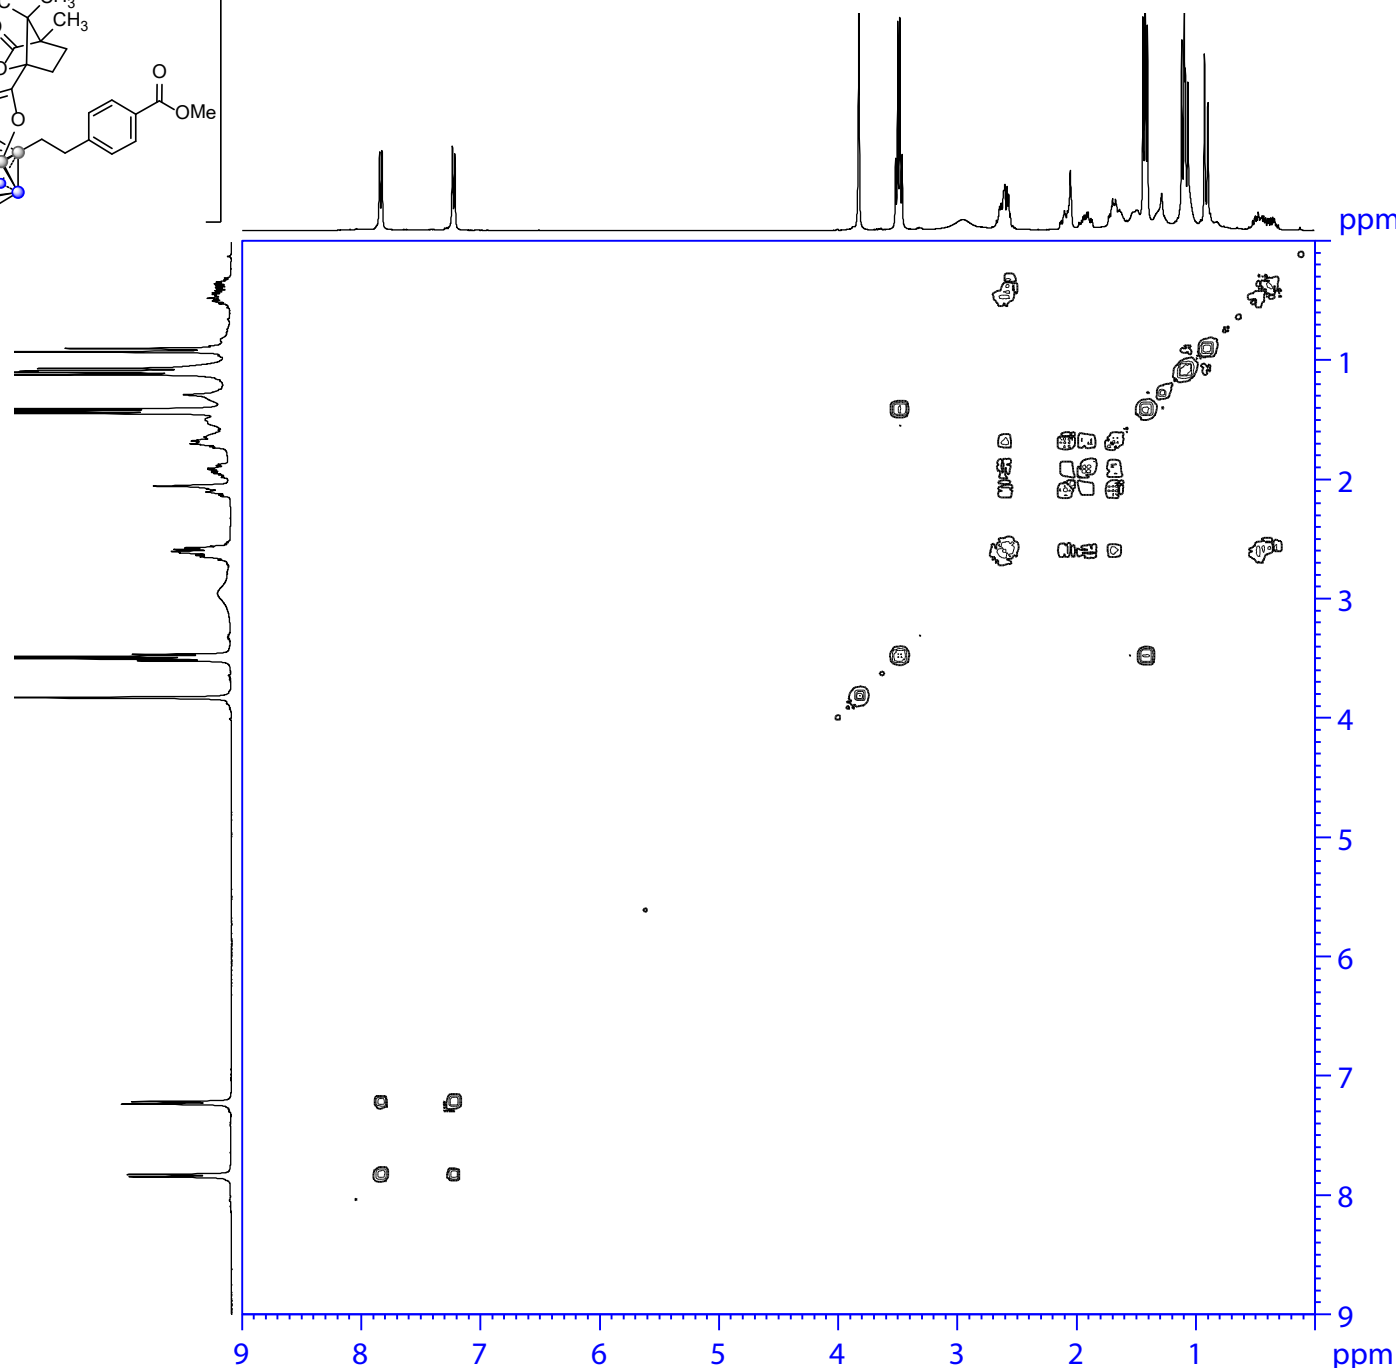

Current Data Parameters  
NAME 20191213-RV-B12C-4COOMeStyr  
EXPNO 7  
PROCNO 1

F2 - Acquisition Parameters  
Date\_ 20191214  
Time 15.07  
INSTRUM spect  
PROBHD 5 mm PABBO BB/  
PULPROG cosygpppqf  
TD 2048  
SOLVENT Acetone  
NS 2  
DS 8  
SWH 5341.880 Hz  
FIDRES 2.608340 Hz  
AQ 0.1916928 sec  
RG 193.34  
DW 93.600 usec  
DE 6.50 usec  
TE 295.1 K  
D0 0.00000300 sec  
D1 2.00000000 sec  
D11 0.03000000 sec  
D12 0.00002000 sec  
D13 0.00000400 sec  
D16 0.00020000 sec  
IN0 0.00018720 sec

===== CHANNEL f1 =====  
NUC1  $^1\text{H}$   
P0 15.00 usec  
P1 15.00 usec  
P17 2500.00 usec  
PLW1 12.50000000 W  
PLW10 4.16050005 W  
SFO1 400.1324057 MHz

===== GRADIENT CHANNEL =====  
GPNAM[1] SMSQ10.100  
GPZ1 10.00 %  
P16 1000.00 usec

F1 - Acquisition parameters  
TD 128  
SFO1 400.1324 MHz  
FIDRES 83.466881 Hz  
SW 13.350 ppm  
FnMODE QF

F2 - Processing parameters  
SI 1024  
SF 400.1300098 MHz  
WDW QSINE  
SSB 0  
LB 0 Hz  
GB 0  
PC 1.40

F1 - Processing parameters  
SI 1024  
MC2 QF  
SF 400.1300095 MHz  
WDW QSINE  
SSB 0  
LB 0 Hz  
GB 0



<sup>1</sup>H - <sup>13</sup>C HSQC NMR

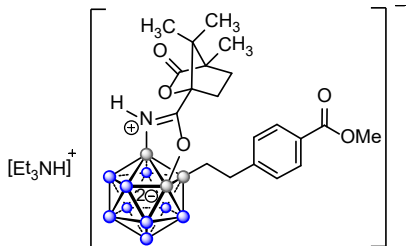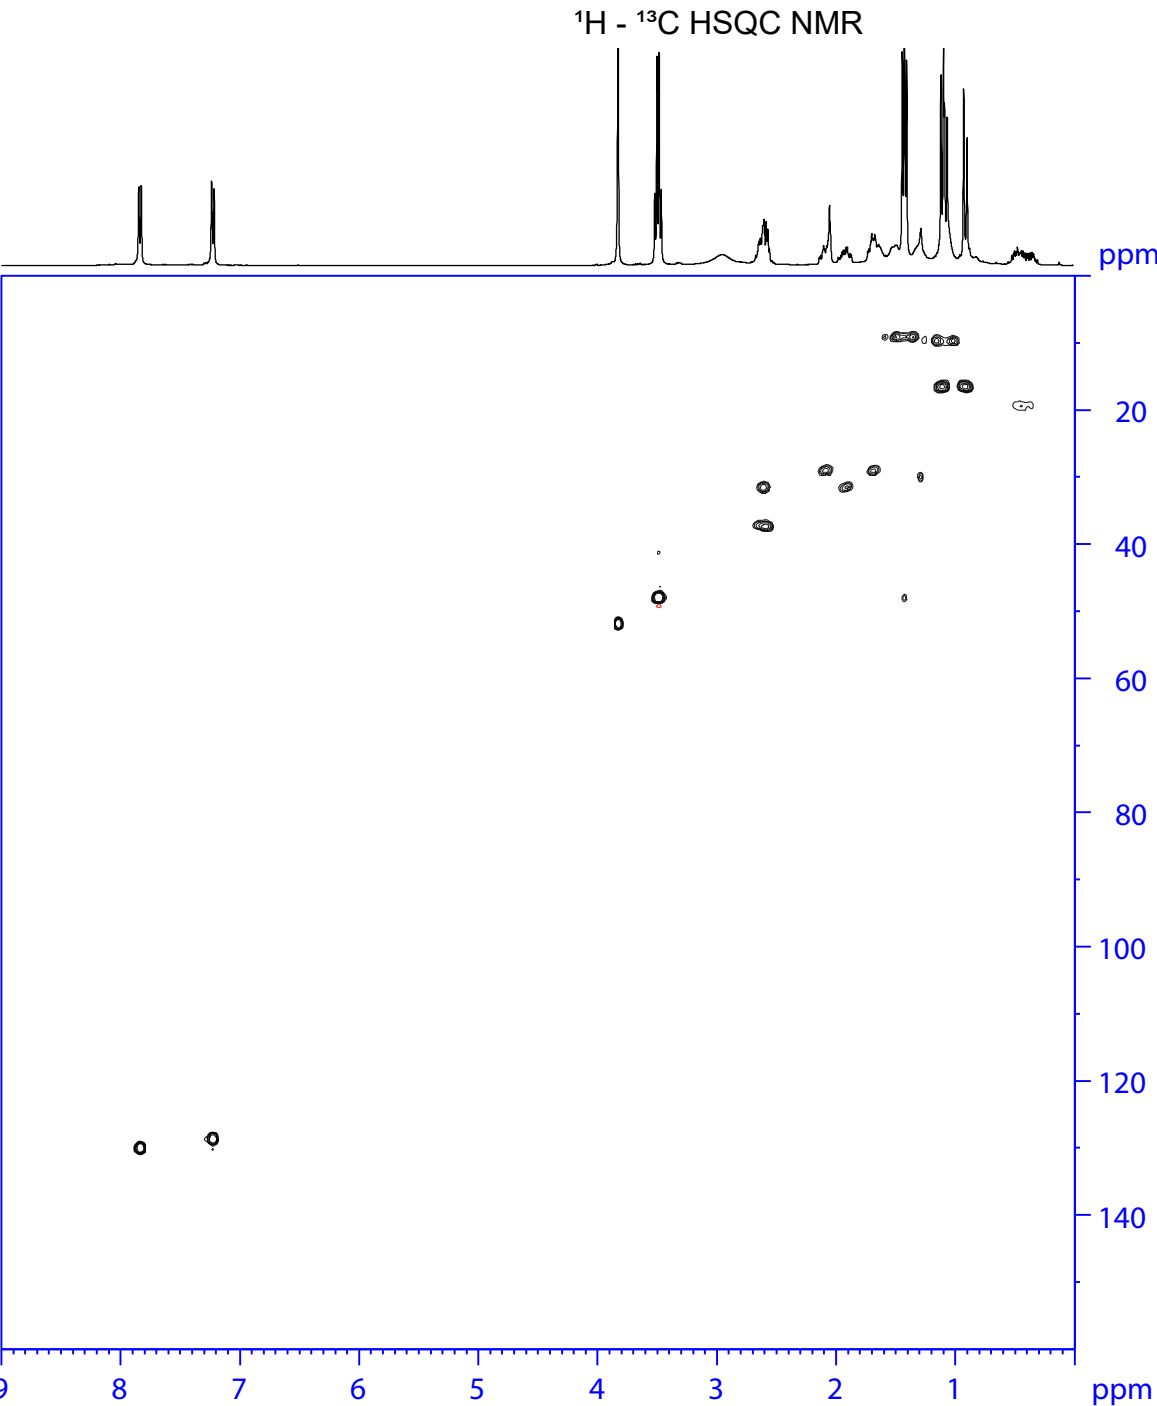

Current Data Parameters  
 NAME 20191213-RV-B12C-4COOMeStyr  
 EXPNO 8  
 PROCNO 1

F2 - Acquisition Parameters  
 Date\_ 20191214  
 Time 15.16  
 INSTRUM spect  
 PROBHD 5 mm PABBO BB/  
 PULPROG hsqcetgpsi2  
 TD 1024  
 SOLVENT Acetone  
 NS 2  
 DS 16  
 SWH 6009.615 Hz  
 FIDRES 5.868765 Hz  
 AQ 0.0851968 sec  
 RG 193.34  
 DW 83.200 usec  
 DE 6.50 usec  
 TE 295.0 K  
 CNST2 145.0000000  
 D0 0.00000300 sec  
 D1 1.50000000 sec  
 D4 0.00172414 sec  
 D11 0.03000000 sec  
 D16 0.00020000 sec  
 D24 0.00086207 sec  
 IN0 0.00001990 sec  
 ZGOPTNS

===== CHANNEL f1 =====  
 NUC1 <sup>1</sup>H  
 P1 15.00 usec  
 P2 30.00 usec  
 P28 1000.00 usec  
 PLW1 12.50000000 W  
 SFO1 400.1328009 MHz

===== CHANNEL f2 =====  
 CPDPRG2 garp  
 NUC2 <sup>13</sup>C  
 P3 10.00 usec  
 P4 20.00 usec  
 PCPD2 70.00 usec  
 PLW2 53.00000000 W  
 PLW12 1.08159995 W  
 SFO2 100.6238364 MHz

===== GRADIENT CHANNEL =====  
 GPNAM[1] SMSQ10.100  
 GPNAM[2] SMSQ10.100  
 GPNAM[3] SMSQ10.100  
 GPNAM[4] SMSQ10.100  
 GPZ1 80.00 %  
 GPZ2 20.10 %  
 GPZ3 11.00 %  
 GPZ4 -5.00 %  
 P16 1000.00 usec  
 P19 600.00 usec

F1 - Acquisition parameters  
 TD 256  
 SFO1 100.6238 MHz  
 FIDRES 196.524048 Hz  
 SW 249.991 ppm  
 FmMODE Echo-Antiecho

F2 - Processing parameters  
 SI 1024  
 SF 400.1300092 MHz  
 WDW QSINE  
 SSB 2  
 LB 0 Hz  
 GB 0  
 PC 1.40

F1 - Processing parameters  
 SI 1024  
 MC2 echo-antiecho  
 SF 100.6126866 MHz  
 WDW QSINE  
 SSB 2  
 LB 0 Hz  
 GB 0

20190802-B12C-4F-Styr 20 mg white solid  $[\text{Et}_3\text{NH}][\text{B}_{12}\text{H}_{10}\text{NHCO}(\text{Camphanic})\text{CH}_2\text{CH}_2\text{C}_6\text{H}_4\text{-4F}]$  dissolved in 0.6 mL acetone- $d_6^*$

400MHz  $^1\text{H}$  NMR,  $\circ$  deuterated solvent residual peak= 2.05 ppm;  $\diamond$  water peak

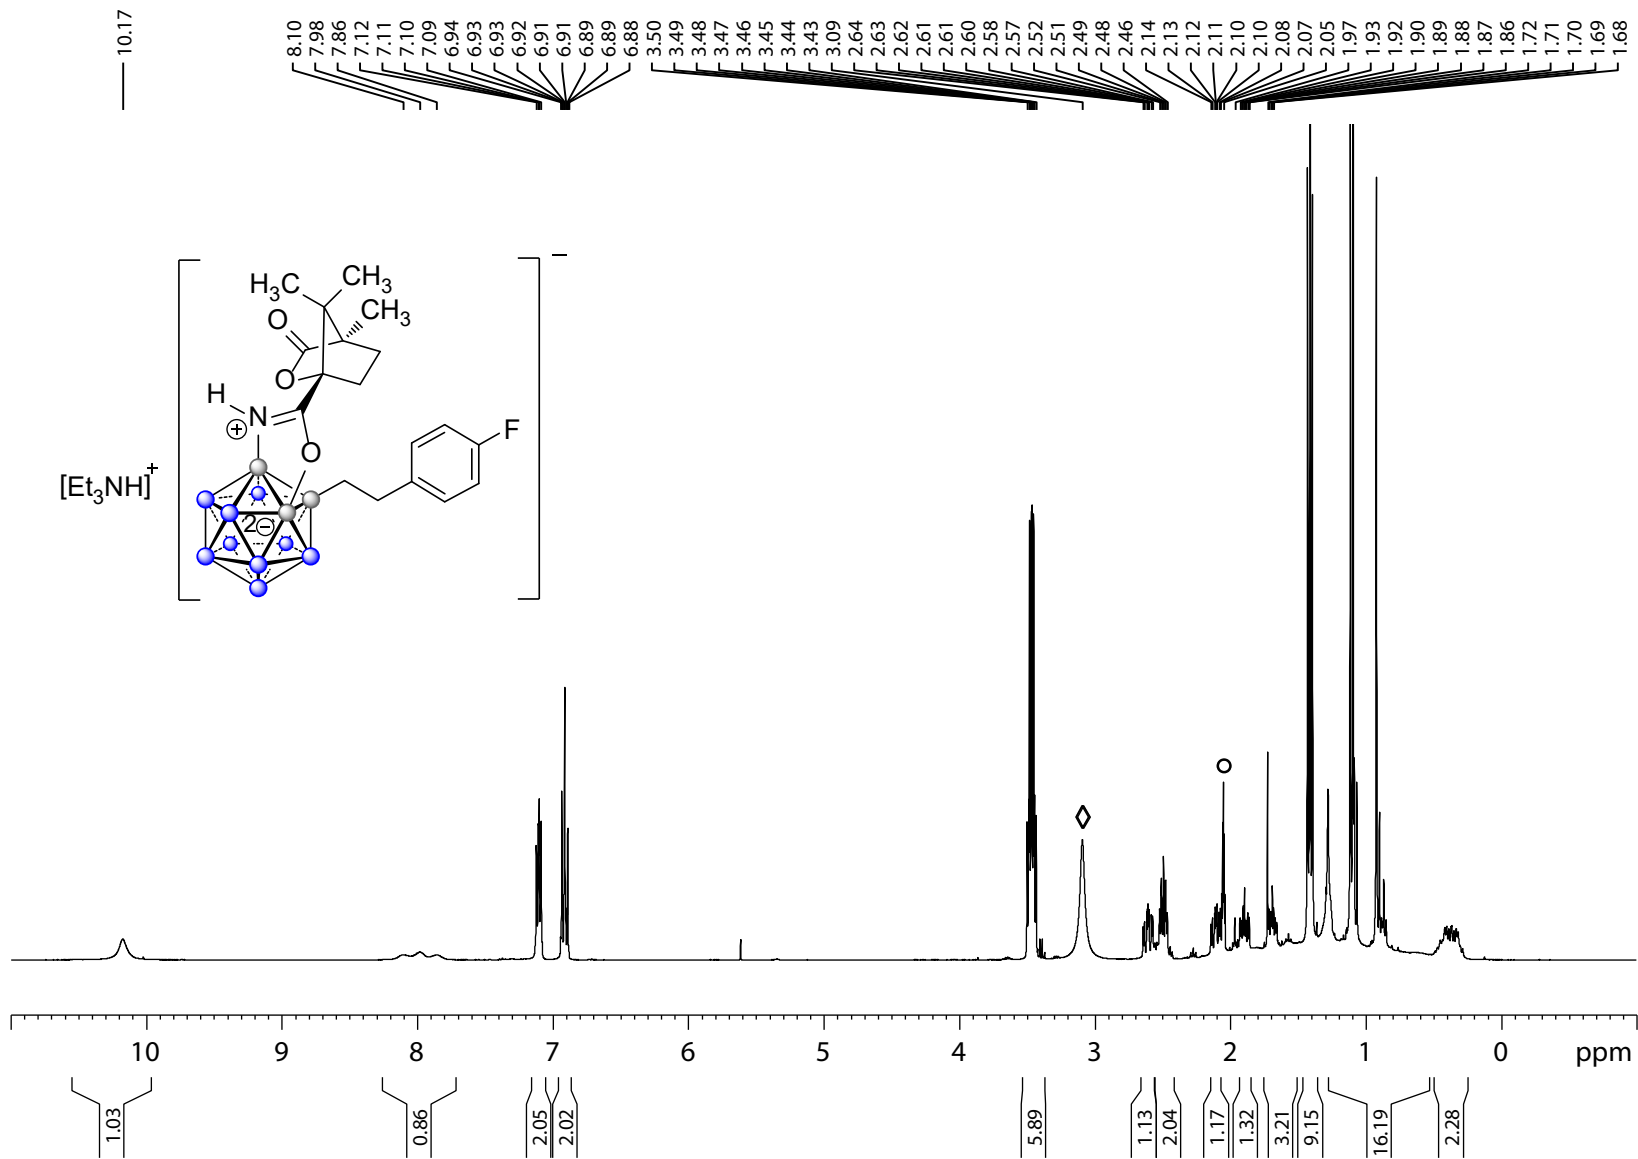

Current Data Parameters  
 NAME 20190802-RV-B12C-4F-Styr  
 EXPNO 1  
 PROCNO 1

F2 - Acquisition Parameters  
 Date\_ 20190802  
 Time\_ 12.39  
 INSTRUM spect  
 PROBHD 5 mm PABBO BB/  
 PULPROG zg30  
 TD 65536  
 SOLVENT Acetone  
 NS 16  
 DS 2  
 SWH 10000.000 Hz  
 FIDRES 0.152588 Hz  
 AQ 3.2767999 sec  
 RG 55.74  
 DW 50.000 usec  
 DE 6.50 usec  
 TE 295.2 K  
 D1 1.00000000 sec  
 TD0 1

==== CHANNEL f1 =====  
 NUC1 1H  
 P1 15.00 usec  
 PLW1 12.5000000 W  
 SFO1 400.1328009 MHz

F2 - Processing parameters  
 SI 65536  
 SF 400.1300070 MHz  
 WDW EM  
 SSB 0  
 LB 0.30 Hz  
 GB 0  
 PC 1.00

20190802-B12C-4F-Styr 20 mg white solid  $[\text{Et}_3\text{NH}]_2[\text{B}_{12}\text{H}_{10}\text{NHCO}(\text{Camphanic})\text{CH}_2\text{CH}_2\text{C}_6\text{H}_4\text{-4F}]$  dissolved in 0.6 mL acetone- $d_6^*$

400MHz  $^1\text{H}\{\text{B}\}$  NMR,  $\circ$  deuterated solvent residual peak= 2.05 ppm;  $\diamond$  water peak

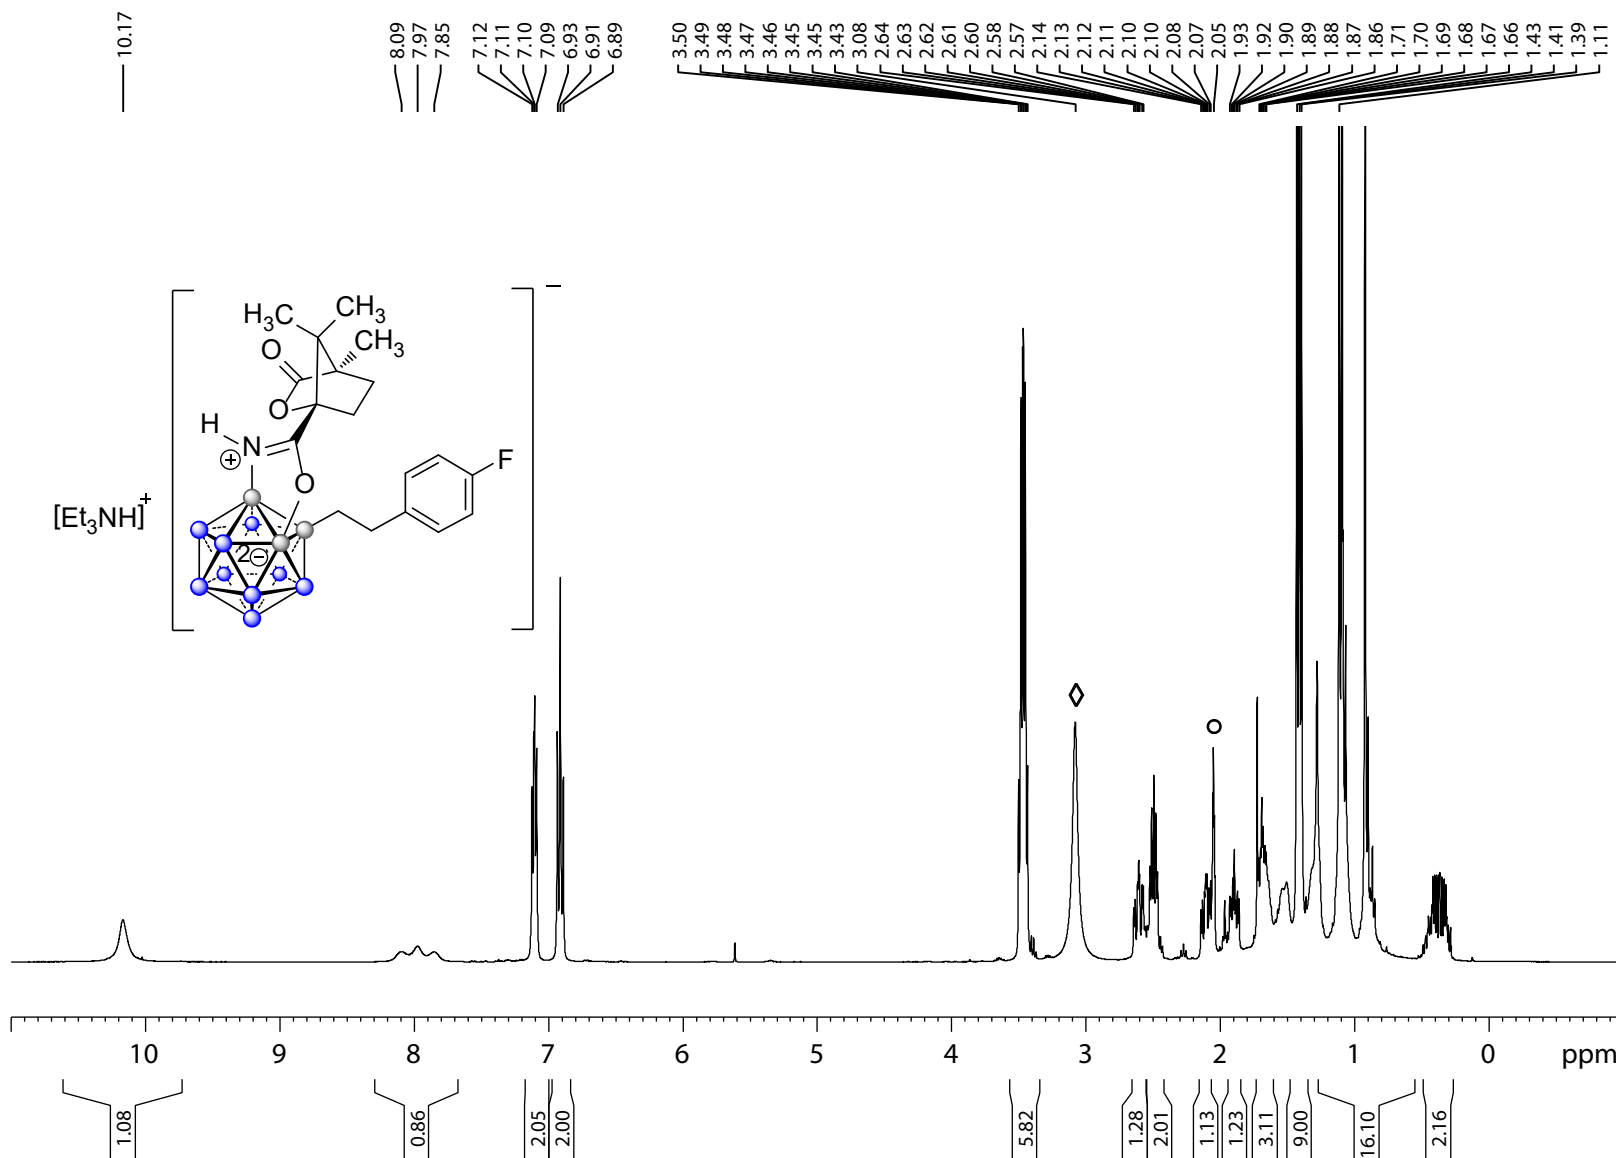

Current Data Parameters  
 NAME 20190802-RV-B12C-4F-Styr  
 EXPNO 2  
 PROCNO 1

F2 - Acquisition Parameters  
 Date\_ 20190802  
 Time\_ 12.41  
 INSTRUM spect  
 PROBHD 5 mm PABBO BB/  
 PULPROG zgig30  
 TD 16384  
 SOLVENT Acetone  
 NS 16  
 DS 4  
 SWH 8012.820 Hz  
 FIDRES 0.489064 Hz  
 AQ 1.0223616 sec  
 RG 55.74  
 DW 62.400 usec  
 DE 6.50 usec  
 TE 295.3 K  
 D1 1.00000000 sec  
 D11 0.03000000 sec  
 TD0 1

==== CHANNEL f1 =====  
 NUC1 1H  
 P1 15.00 usec  
 PLW1 12.50000000 W  
 SFO1 400.1320007 MHz

==== CHANNEL f2 =====  
 CPDPRG[2] garp4  
 NUC2 11B  
 PCPD2 90.00 usec  
 PLW2 52.96599960 W  
 PLW12 0.64477998 W  
 SFO2 128.3776050 MHz

F2 - Processing parameters  
 SI 32768  
 SF 400.1300071 MHz  
 WDW EM  
 SSB 0  
 LB 1.00 Hz  
 GB 0  
 PC 1.40

20190802-B12C-4F-Styr 20 mg white solid [Et<sub>3</sub>NH][B<sub>12</sub>H<sub>10</sub>NHCO(Camphanic)CH<sub>2</sub>CH<sub>2</sub>C<sub>6</sub>H<sub>4</sub>-4F] dissolved in 0.6 mL acetone-d<sub>6</sub>\*

<sup>11</sup>B NMR 128 MHz

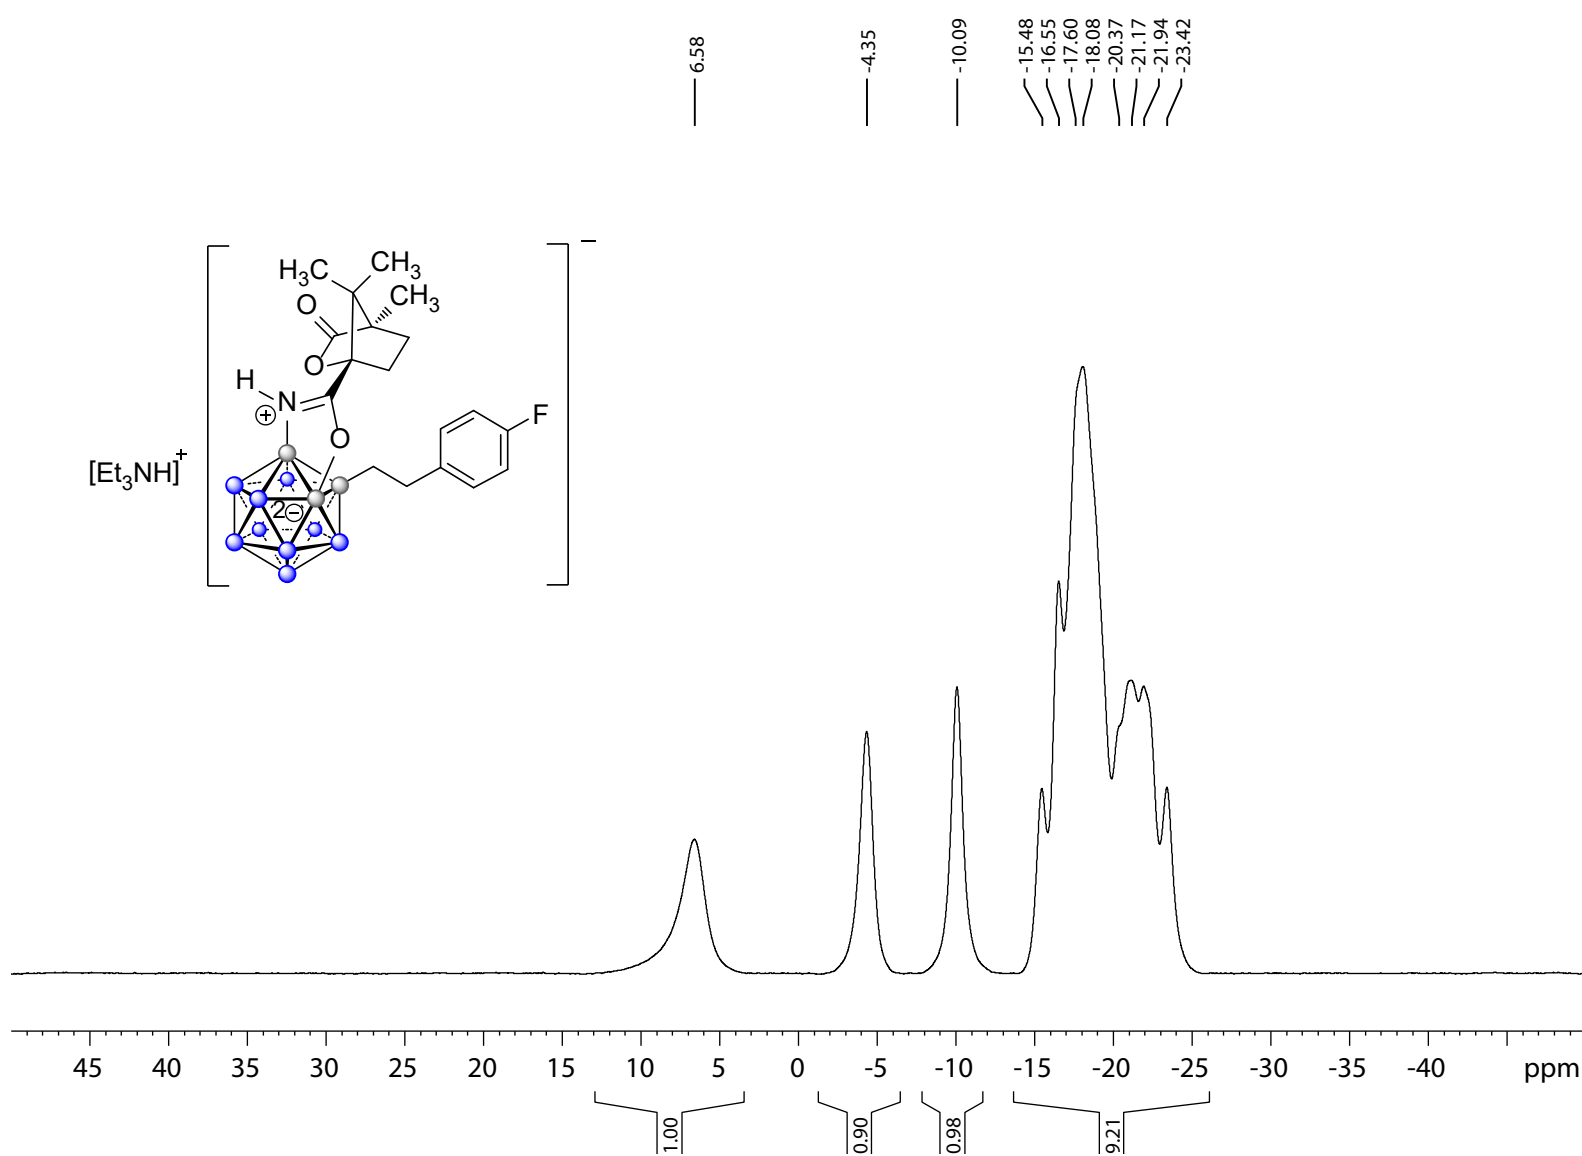

Current Data Parameters  
NAME 20190802-RV-B12C-4F-Styr  
EXPNO 3  
PROCNO 1

F2 - Acquisition Parameters  
Date\_ 20190802  
Time\_ 12.47  
INSTRUM spect  
PROBHD 5 mm PABBO BB/  
PULPROG zg  
TD 65536  
SOLVENT Acetone  
NS 128  
DS 4  
SWH 25510.203 Hz  
FIDRES 0.389255 Hz  
AQ 1.2845056 sec  
RG 193.34  
DW 19.600 usec  
DE 6.50 usec  
TE 295.2 K  
D1 1.00000000 sec  
TD0 1

==== CHANNEL f1 =====  
NUC1 11B  
P1 9.93 usec  
PLW1 52.96599960 W  
SFO1 128.3776052 MHz

F2 - Processing parameters  
SI 32768  
SF 128.3776050 MHz  
WDW EM  
SSB 0  
LB 10.00 Hz  
GB 0  
PC 1.40

NMR-042

20190802-B12C-4F-Styr 20 mg white solid [Et<sub>3</sub>NH][B<sub>12</sub>H<sub>10</sub>NHCO(Camphanic)CH<sub>2</sub>CH<sub>2</sub>C<sub>6</sub>H<sub>4</sub>-4F] dissolved in 0.6 mL acetone-*d*<sub>6</sub>\*

<sup>11</sup>B{H} NMR 128 MHz

Current Data Parameters  
 NAME 20190802-RV-B12C-4F-Styr  
 EXPNO 4  
 PROCNO 1

F2 - Acquisition Parameters  
 Date\_ 20190802  
 Time\_ 12.53  
 INSTRUM spect  
 PROBHD 5 mm PABBO BB/  
 PULPROG zgpg30  
 TD 65536  
 SOLVENT Acetone  
 NS 128  
 DS 4  
 SWH 25510.203 Hz  
 FIDRES 0.389255 Hz  
 AQ 1.2845056 sec  
 RG 193.34  
 DW 19.600 usec  
 DE 6.50 usec  
 TE 296.0 K  
 D1 1.00000000 sec  
 D11 0.03000000 sec  
 TD0 1

===== CHANNEL f1 =====  
 NUC1 11B  
 P1 9.93 usec  
 PLW1 52.96599960 W  
 SFO1 128.3776050 MHz

===== CHANNEL f2 =====  
 CPDPRG[2] waltz16  
 NUC2 1H  
 PCPD2 80.00 usec  
 PLW2 12.50000000 W  
 PLW12 0.43945000 W  
 PLW13 0.28125000 W  
 SFO2 400.1320007 MHz

F2 - Processing parameters  
 SI 32768  
 SF 128.3776050 MHz  
 WDW EM  
 SSB 0  
 LB 10.00 Hz  
 GB 0  
 PC 1.40

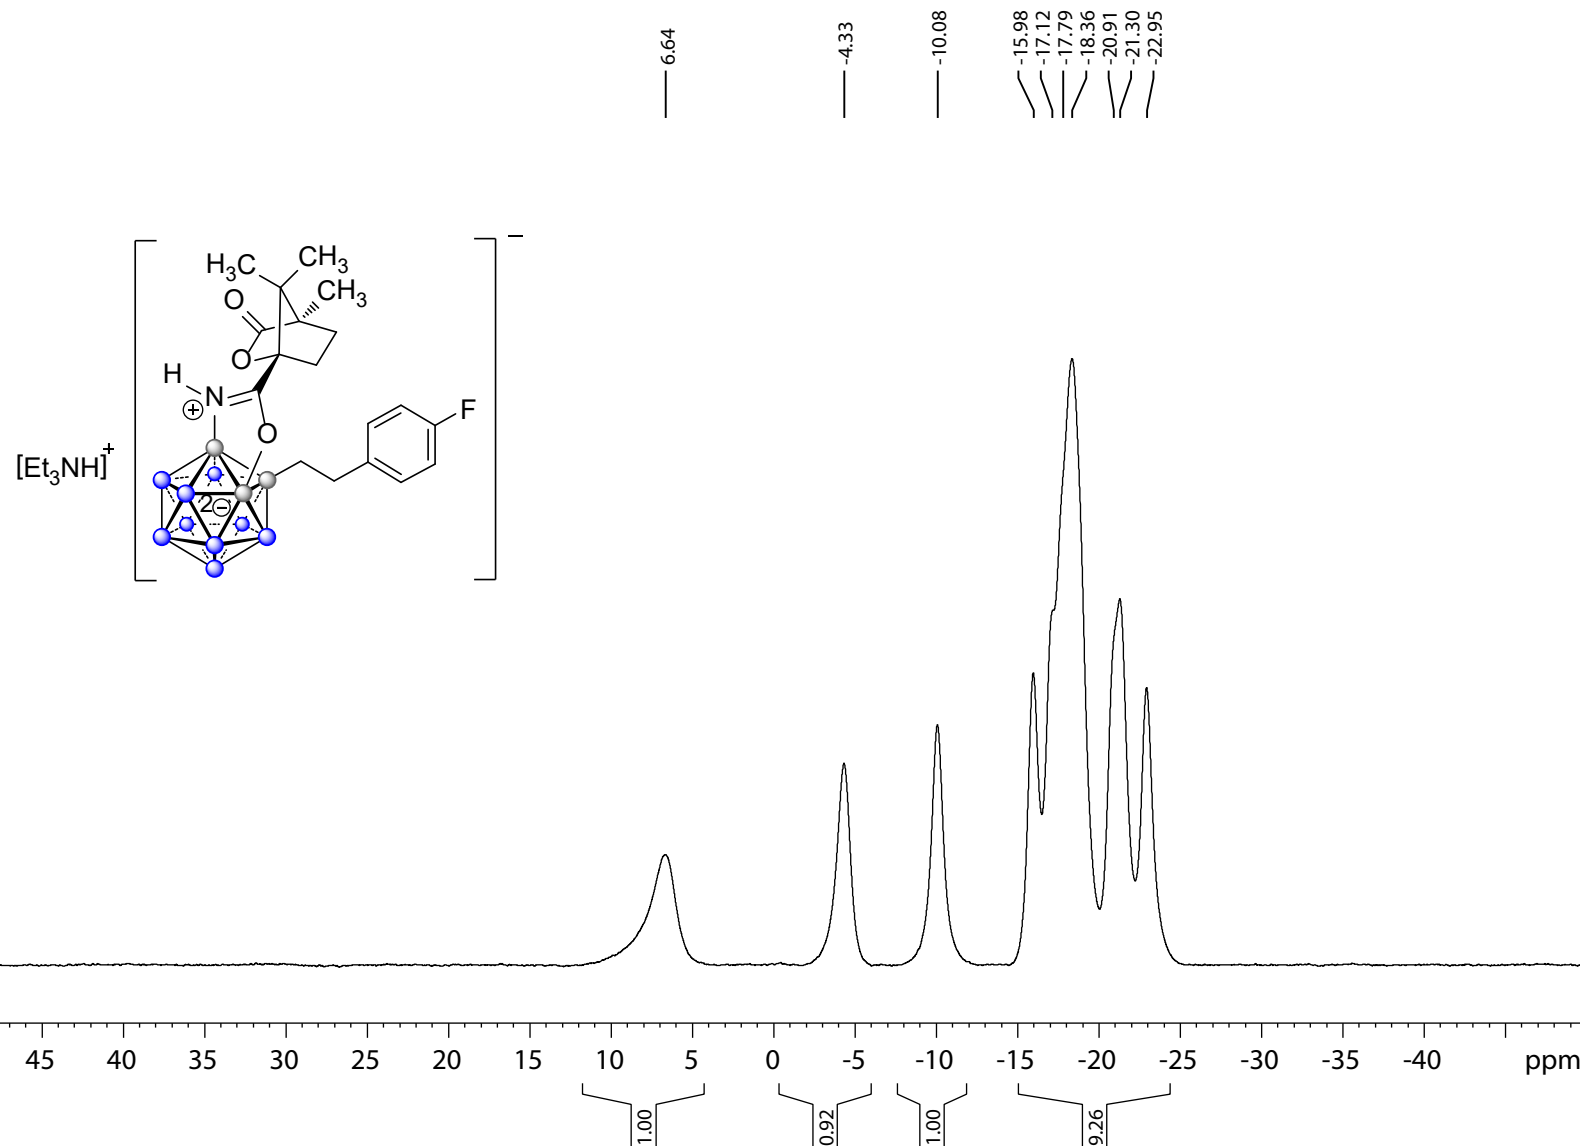

20190802-B12C-4F-Styr 20 mg white solid [Et<sub>3</sub>NH][B<sub>12</sub>H<sub>10</sub>NHCO(Camphanic)CH<sub>2</sub>CH<sub>2</sub>C<sub>6</sub>H<sub>4</sub>-4F] dissolved in 0.6 mL acetone-d<sub>6</sub>\*

<sup>13</sup>C{<sup>1</sup>H} NMR 100 MHz

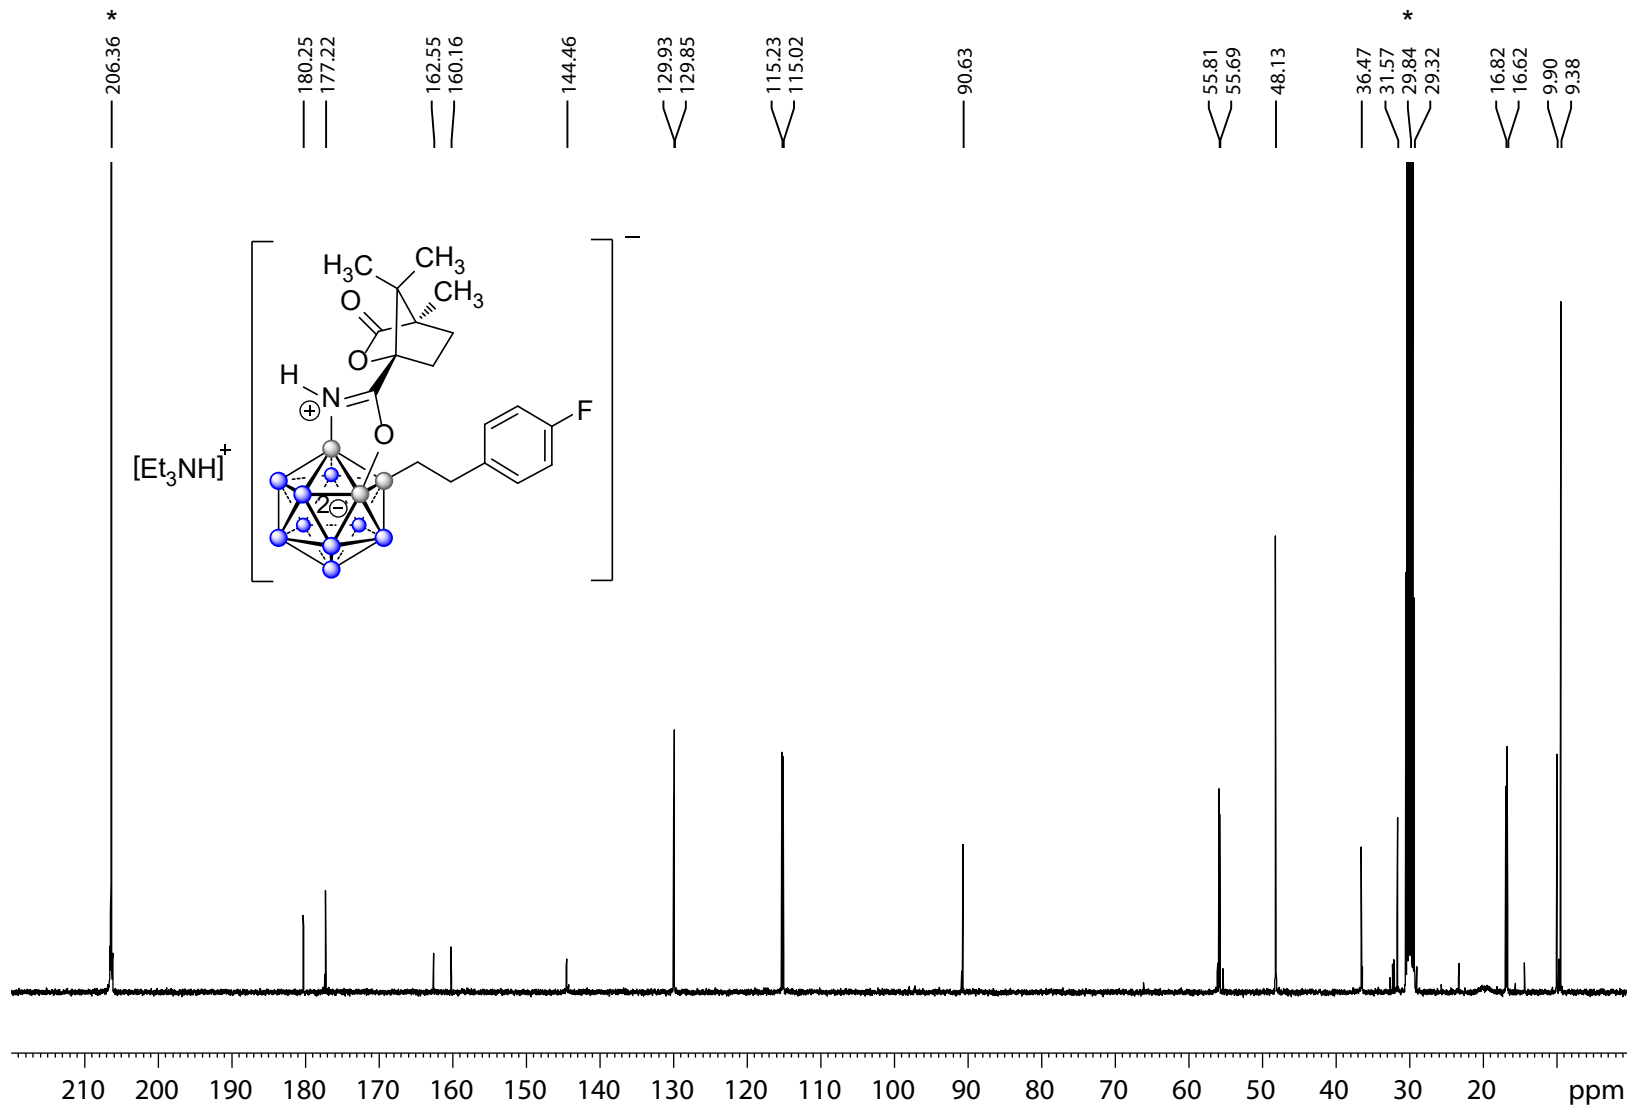

Current Data Parameters  
 NAME 20190802-RV-B12C-4F-Styr  
 EXPNO 5  
 PROCNO 1

F2 - Acquisition Parameters  
 Date\_ 20190802  
 Time\_ 14.25  
 INSTRUM spect  
 PROBHD 5 mm PABBO BB/  
 PULPROG zgpg30  
 TD 65536  
 SOLVENT Acetone  
 NS 2048  
 DS 4  
 SWH 29761.904 Hz  
 FIDRES 0.454131 Hz  
 AQ 1.1010048 sec  
 RG 193.34  
 DW 16.800 usec  
 DE 6.50 usec  
 TE 295.9 K  
 D1 1.50000000 sec  
 D11 0.03000000 sec  
 TD0 1

===== CHANNEL f1 =====  
 NUC1 13C  
 P1 10.00 usec  
 PLW1 53.00000000 W  
 SFO1 100.6228293 MHz

===== CHANNEL f2 =====  
 CPDPRG[2] waltz16  
 NUC2 1H  
 PCPD2 80.00 usec  
 PLW2 12.50000000 W  
 PLW12 0.43945000 W  
 PLW13 0.28125000 W  
 SFO2 400.1316005 MHz

F2 - Processing parameters  
 SI 32768  
 SF 100.6126870 MHz  
 WDW EM  
 SSB 0  
 LB 1.00 Hz  
 GB 0  
 PC 1.40

20190802-B12C-4F-Styr 20 mg white solid  $[\text{Et}_3\text{NH}][\text{B}_{12}\text{H}_{10}\text{NHCO}(\text{Camphanic})\text{CH}_2\text{CH}_2\text{C}_6\text{H}_4\text{-4F}]$  dissolved in 0.6 mL acetone- $d_6^*$

$^{13}\text{CDEPT}$  NMR 100 MHz

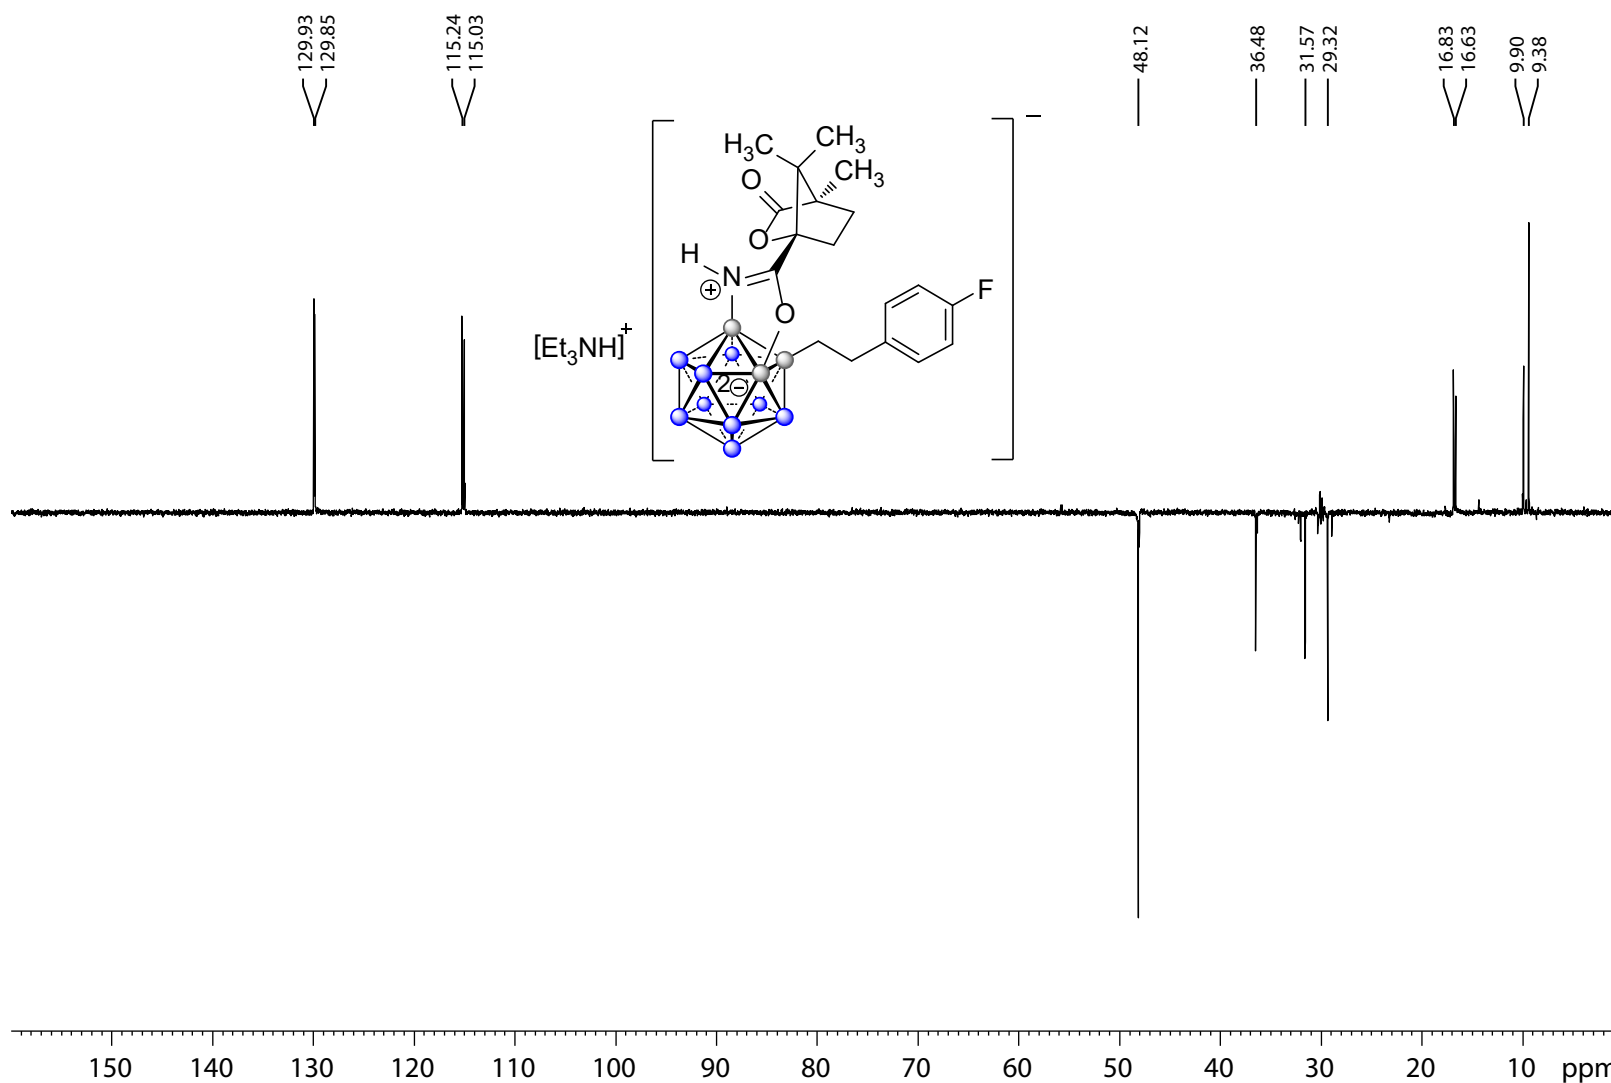

Current Data Parameters  
 NAME 20190802-RV-B12C-4F-Styr  
 EXPNO 6  
 PROCNO 1

F2 - Acquisition Parameters  
 Date\_ 20190802  
 Time\_ 14.53  
 INSTRUM spect  
 PROBHD 5 mm PABBO BB/  
 PULPROG dept135  
 TD 65536  
 SOLVENT Acetone  
 NS 512  
 DS 4  
 SWH 29296.875 Hz  
 FIDRES 0.447035 Hz  
 AQ 1.1184810 sec  
 RG 193.34  
 DW 17.067 usec  
 DE 6.50 usec  
 TE 295.5 K  
 CNST2 145.0000000  
 D1 2.00000000 sec  
 D2 0.00344828 sec  
 D12 0.00002000 sec  
 TD0 1

==== CHANNEL f1 =====  
 NUC1 13C  
 P1 10.00 usec  
 P2 20.00 usec  
 PLW1 53.00000000 W  
 SFO1 100.6228293 MHz

==== CHANNEL f2 =====  
 CPDPRG[2] waltz16  
 NUC2 1H  
 P3 15.00 usec  
 P4 30.00 usec  
 PCPD2 80.00 usec  
 PLW2 12.50000000 W  
 PLW12 0.43945000 W  
 SFO2 400.1316005 MHz

F2 - Processing parameters  
 SI 32768  
 SF 100.6126867 MHz  
 WDW EM  
 SSB 0  
 LB 1.00 Hz  
 GB 0  
 PC 4.00

<sup>1</sup>H - <sup>1</sup>H COSY NMR

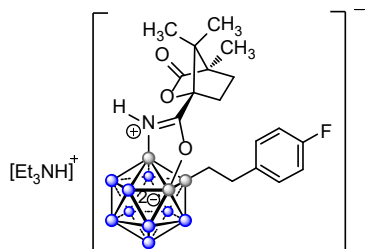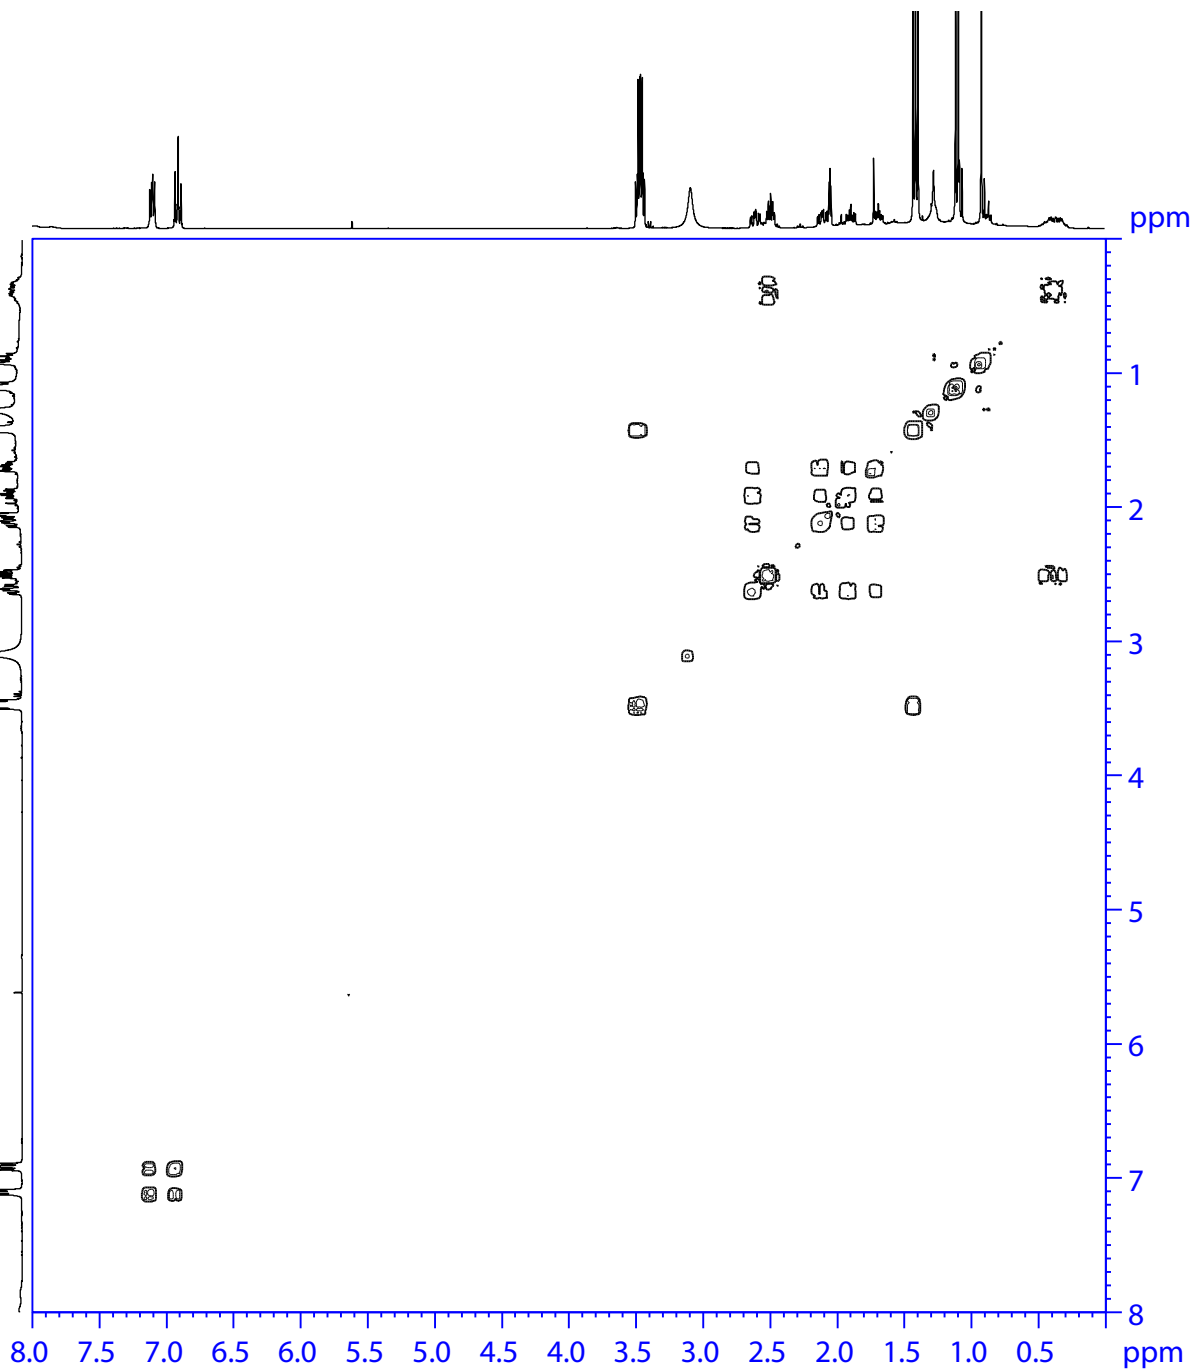

Current Data Parameters  
 NAME 20190802-RV-B12C-4F-Styr  
 EXPNO 7  
 PROCNO 1

F2 - Acquisition Parameters  
 Date 20190802  
 Time 14.54  
 INSTRUM spect  
 PROBHD 5 mm PABBO BB/  
 PULPROG cosygpppqf  
 TD 2048  
 SOLVENT Acetone  
 NS 2  
 DS 8  
 SWH 5341.880 Hz  
 FIDRES 2.608340 Hz  
 AQ 0.1916928 sec  
 RG 95.29  
 DW 93.600 usec  
 DE 6.50 usec  
 TE 295.3 K  
 D0 0.00000300 sec  
 D1 2.00000000 sec  
 D11 0.03000000 sec  
 D12 0.00002000 sec  
 D13 0.00000400 sec  
 D16 0.00020000 sec  
 IN0 0.00018720 sec

===== CHANNEL f1 =====  
 NUC1 1H  
 P0 15.00 usec  
 P1 15.00 usec  
 P17 2500.00 usec  
 PLW1 12.50000000 W  
 PLW10 4.16050005 W  
 SFO1 400.1324057 MHz

===== GRADIENT CHANNEL =====  
 GPNAM[1] SMSQ10.100  
 GPZ1 10.00 %  
 P16 1000.00 usec

F1 - Acquisition parameters  
 TD 128  
 SFO1 400.1324 MHz  
 FIDRES 83.466881 Hz  
 SW 13.350 ppm  
 FnMODE QF

F2 - Processing parameters  
 SI 1024  
 SF 400.1300000 MHz  
 WDW QSINE  
 SSB 0  
 LB 0 Hz  
 GB 0  
 PC 1.40

F1 - Processing parameters  
 SI 1024  
 MC2 QF  
 SF 400.1300000 MHz  
 WDW QSINE  
 SSB 0  
 LB 0 Hz  
 GB 0



20190802-B12C-4F-Styr 20 mg white solid [Et<sub>3</sub>NH][B<sub>12</sub>H<sub>10</sub>NHCO(Camphanic)CH<sub>2</sub>CH<sub>2</sub>C<sub>6</sub>H<sub>4</sub>-4F] dissolved in 0.6 mL acetone-d<sub>6</sub>\*

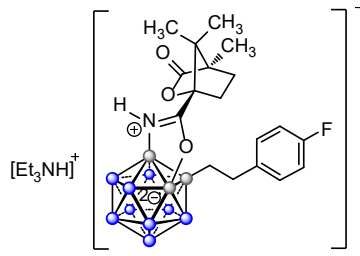

<sup>1</sup>H - <sup>13</sup>C HSQC NMR

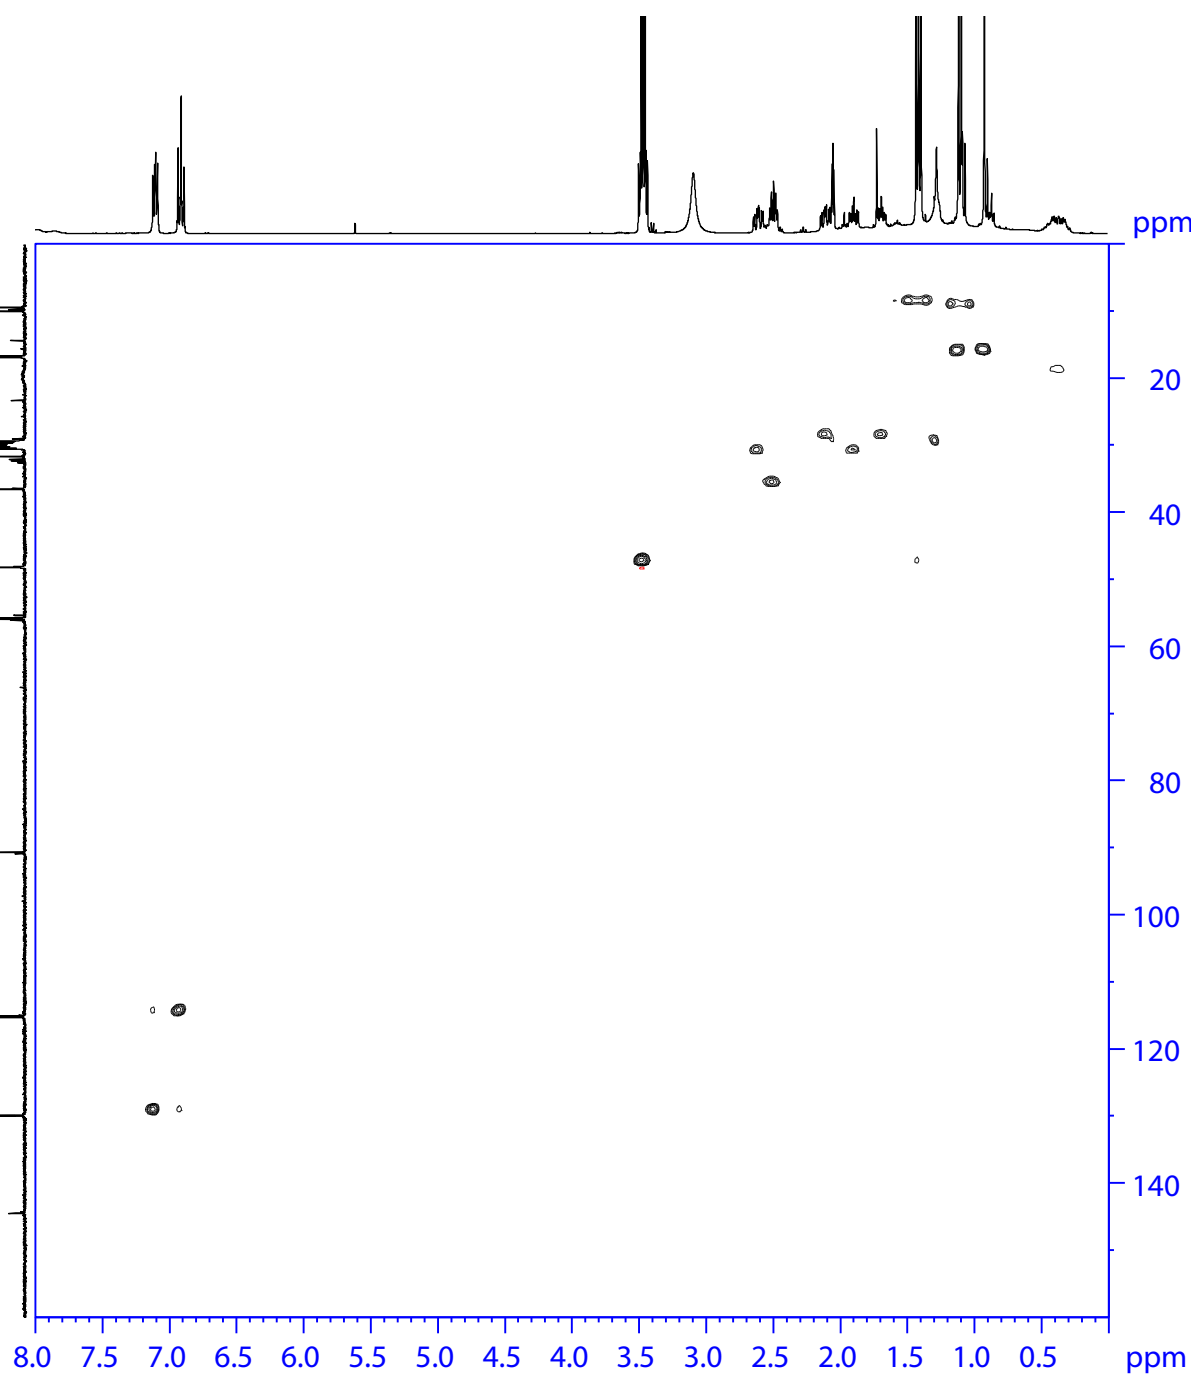

Current Data Parameters  
 NAME 20190802-RV-B12C-4F-Styr  
 EXPNO 8  
 PROCNO 1

F2 - Acquisition Parameters  
 Date\_ 20190802  
 Time\_ 15.05  
 INSTRUM spect  
 PROBHD 5 mm PABBO BB/  
 PULPROG hsqcetgpsi2  
 TD 1024  
 SOLVENT Acetone  
 NS 2  
 DS 16  
 SWH 6009.615 Hz  
 FIDRES 5.868765 Hz  
 AQ 0.0851968 sec  
 RG 193.34  
 DW 83.200 usec  
 DE 6.50 usec  
 TE 295.2 K  
 CNST2 145.0000000  
 D0 0.0000300 sec  
 D1 1.5000000 sec  
 D4 0.00172414 sec  
 D11 0.0300000 sec  
 D16 0.0002000 sec  
 D24 0.00086207 sec  
 IN0 0.00001990 sec  
 ZGPTNS

===== CHANNEL f1 =====  
 NUC1 1H  
 P1 15.00 usec  
 P2 30.00 usec  
 P28 1000.00 usec  
 PLW1 12.5000000 W  
 SFO1 400.1328009 MHz

===== CHANNEL f2 =====  
 CPDPRG[2] garr  
 NUC2 13C  
 P3 10.00 usec  
 P4 20.00 usec  
 PCPD2 70.00 usec  
 PLW2 53.0000000 W  
 PLW12 1.08159995 W  
 SFO2 100.6238364 MHz

===== GRADIENT CHANNEL =====  
 GPNAM[1] SMSQ10.100  
 GPNAM[2] SMSQ10.100  
 GPNAM[3] SMSQ10.100  
 GPNAM[4] SMSQ10.100  
 GPZ1 80.00 %  
 GPZ2 20.10 %  
 GPZ3 11.00 %  
 GPZ4 -5.00 %  
 P16 1000.00 usec  
 P19 600.00 usec

F1 - Acquisition parameters  
 TD 256  
 SFO1 100.6238 MHz  
 FIDRES 196.524048 Hz  
 SW 249.991 ppm  
 FmMODE Echo-Antiecho

F2 - Processing parameters  
 SI 1024  
 SF 400.1300000 MHz  
 WDW QSINE  
 SSB 2  
 LB 0 Hz  
 GB 0  
 FC 1.40

F1 - Processing parameters  
 SI 1024  
 MC2 echo-antiecho  
 SF 100.6127690 MHz  
 WDW QSINE  
 SSB 2  
 LB 0 Hz  
 GB 0

20190921-B12C-4CNStyr 20 mg white solid [Et<sub>3</sub>NH][B<sub>12</sub>H<sub>10</sub>NHCO(Camphanic)CH<sub>2</sub>CH<sub>2</sub>C<sub>6</sub>H<sub>4</sub>-4CN] dissolved in 0.6 mL acetone-d<sub>6</sub>\*

400MHz <sup>1</sup>H NMR, ◊ deuterated solvent residual peak= 2.05 ppm; ◇ water peak

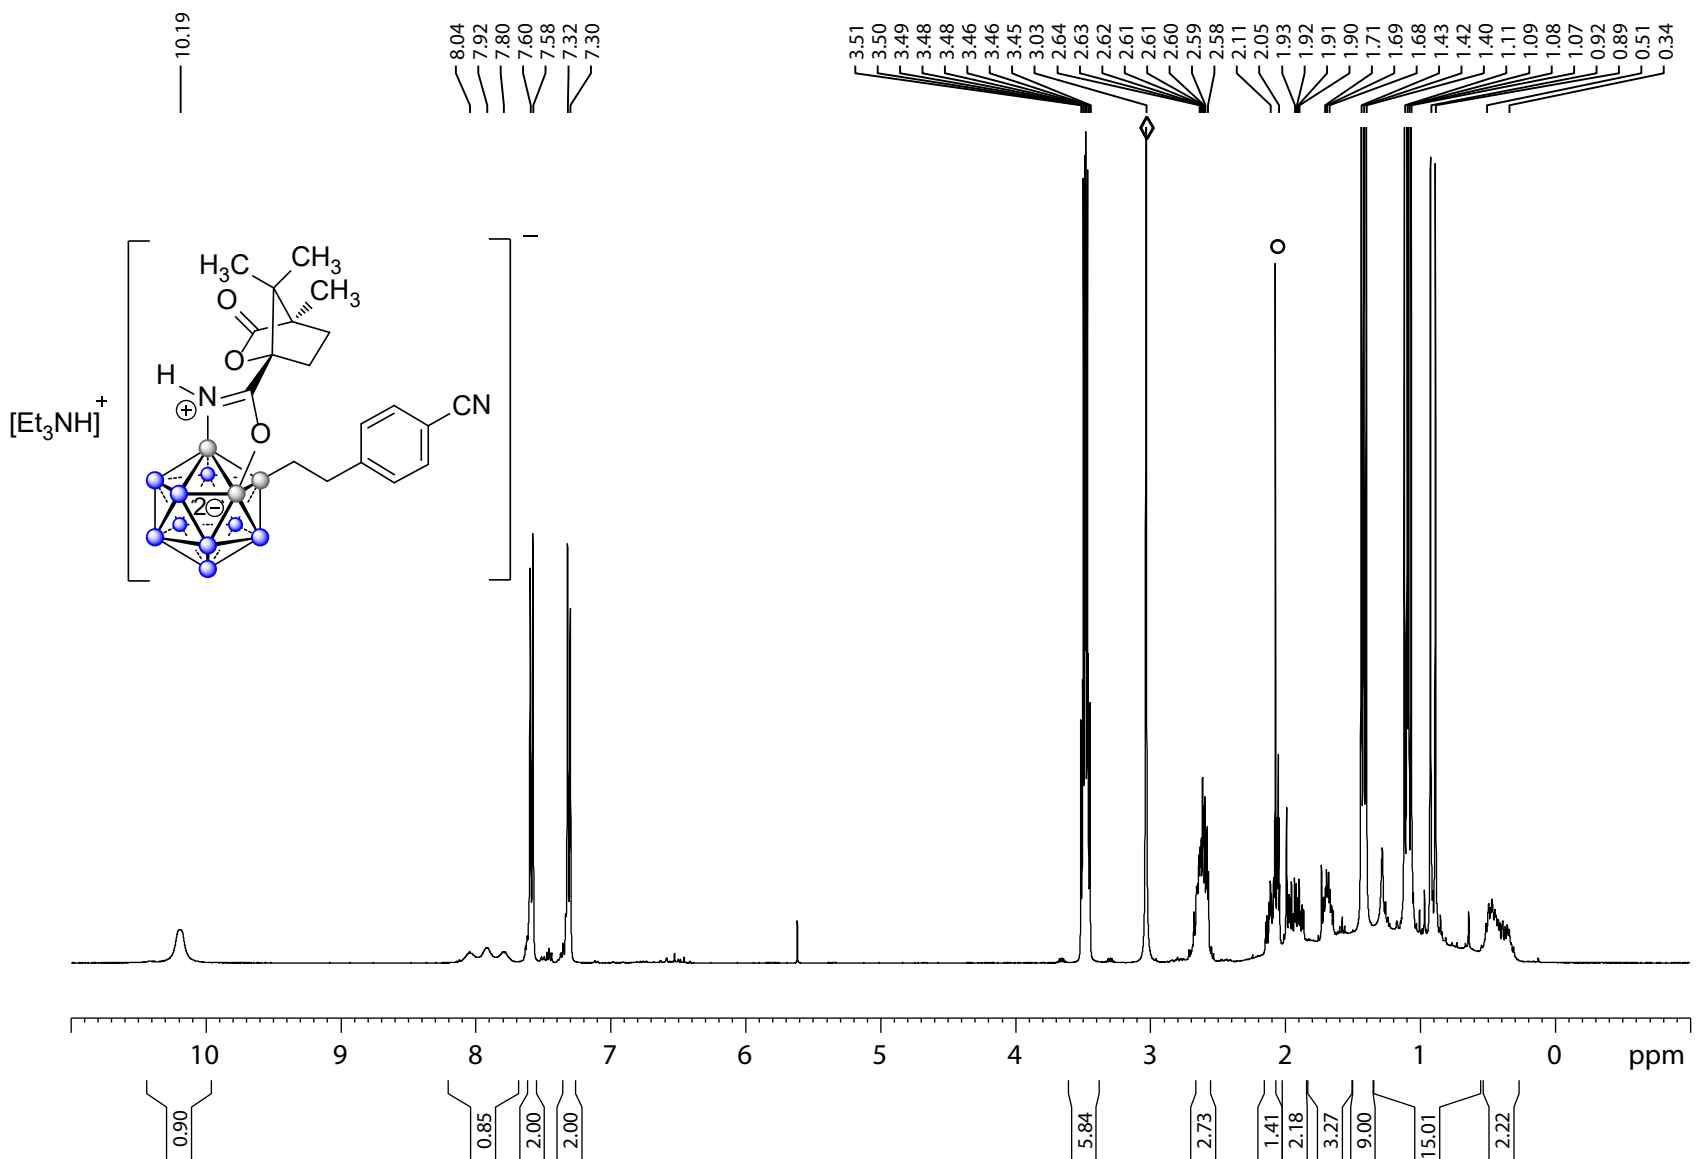

```

Current Data Parameters
NAME      20190921-RV-B12C-4CNStyr
EXPNO    1
PROCNO   1

F2 - Acquisition Parameters
Date_    20190921
Time     16.49
INSTRUM  spect
PROBHD   5 mm PABBO BB/
PULPROG  zg30
TD       65536
SOLVENT  Acetone
NS       16
DS       2
SWH      10000.000 Hz
FIDRES   0.152588 Hz
AQ       3.2767999 sec
RG       64.43
DW       50.000 usec
DE       6.50 usec
TE       295.4 K
D1       1.00000000 sec
TD0      1

===== CHANNEL f1 =====
NUC1     1H
P1       15.00 usec
PLW1     12.50000000 W
SFO1     400.1328009 MHz

F2 - Processing parameters
SI       65536
SF       400.1300072 MHz
WDW      EM
SSB      0
LB       0.30 Hz
GB       0
PC       1.00
    
```

20190921-B12C-4CNStyr 20 mg white solid  $[\text{Et}_3\text{NH}][\text{B}_{12}\text{H}_{10}\text{NHC}(\text{Camphanic})\text{CH}_2\text{CH}_2\text{C}_6\text{H}_4\text{-4CN}]$  dissolved in 0.6 mL acetone- $d_6^*$

400MHz  $^1\text{H}\{\text{B}\}$  NMR,  $\circ$  deuterated solvent residual peak = 2.05 ppm;  $\diamond$  water peak

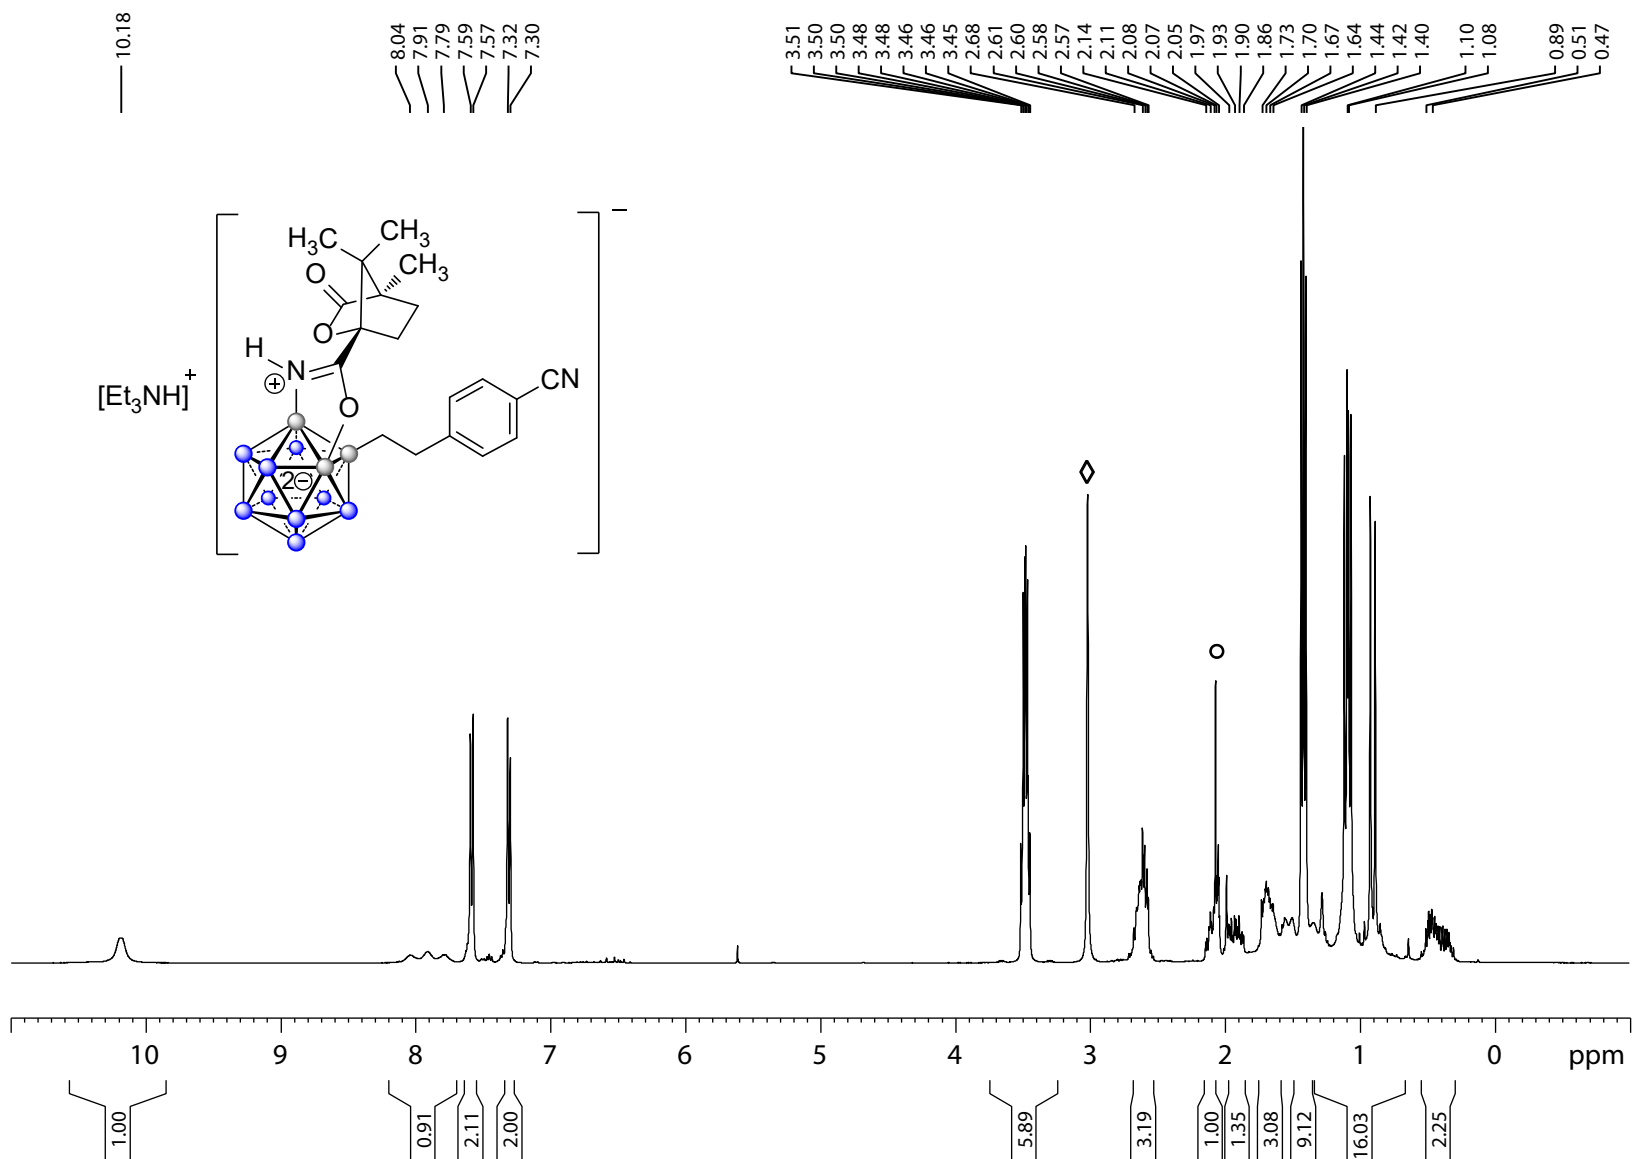

Current Data Parameters  
 NAME 20190921-RV-B12C-4CNStyr  
 EXPNO 2  
 PROCNO 1

F2 - Acquisition Parameters  
 Date\_ 20190921  
 Time\_ 16.52  
 INSTRUM spect  
 PROBHD 5 mm PABBO BB/  
 PULPROG zgig30  
 TD 16384  
 SOLVENT Acetone  
 NS 16  
 DS 4  
 SWH 8012.820 Hz  
 FIDRES 0.489064 Hz  
 AQ 1.0223616 sec  
 RG 64.43  
 DW 62.400 usec  
 DE 6.50 usec  
 TE 295.8 K  
 D1 1.00000000 sec  
 D11 0.03000000 sec  
 TD0 1

===== CHANNEL f1 =====  
 NUC1 1H  
 P1 15.00 usec  
 PLW1 12.50000000 W  
 SFO1 400.1320007 MHz

===== CHANNEL f2 =====  
 CPDPRG[2] garp4  
 NUC2 11B  
 PCPD2 90.00 usec  
 PLW2 52.96599960 W  
 PLW12 0.64477998 W  
 SFO2 128.3776050 MHz

F2 - Processing parameters  
 SI 32768  
 SF 400.1300072 MHz  
 WDW EM  
 SSB 0  
 LB 1.00 Hz  
 GB 0  
 PC 1.40

20190921-B12C-4CNStyr 20 mg white solid [Et<sub>3</sub>NH][B<sub>12</sub>H<sub>10</sub>NHCO(Camphanic)CH<sub>2</sub>CH<sub>2</sub>C<sub>6</sub>H<sub>4</sub>-4CN] dissolved in 0.6 mL acetone-d<sub>6</sub>\*

<sup>11</sup>B NMR 128 MHz

Current Data Parameters  
 NAME 20190921-RV-B12C-4CNStyr  
 EXPNO 3  
 PROCNO 1

F2 - Acquisition Parameters  
 Date\_ 20190921  
 Time\_ 16.58  
 INSTRUM spect  
 PROBHD 5 mm PABBO BB/  
 PULPROG zg  
 TD 65536  
 SOLVENT Acetone  
 NS 128  
 DS 4  
 SWH 25510.203 Hz  
 FIDRES 0.389255 Hz  
 AQ 1.2845056 sec  
 RG 193.34  
 DW 19.600 usec  
 DE 6.50 usec  
 TE 295.9 K  
 D1 1.0000000 sec  
 TD0 1

===== CHANNEL f1 =====  
 NUC1 11B  
 P1 9.93 usec  
 PLW1 52.96599960 W  
 SFO1 128.3776052 MHz

F2 - Processing parameters  
 SI 32768  
 SF 128.3776050 MHz  
 WDW EM  
 SSB 0  
 LB 10.00 Hz  
 GB 0  
 PC 1.40

6.62  
 -4.30  
 -10.26  
 -15.35  
 -16.51  
 -18.17  
 -19.03  
 -20.40  
 -21.11  
 -22.12  
 -23.49

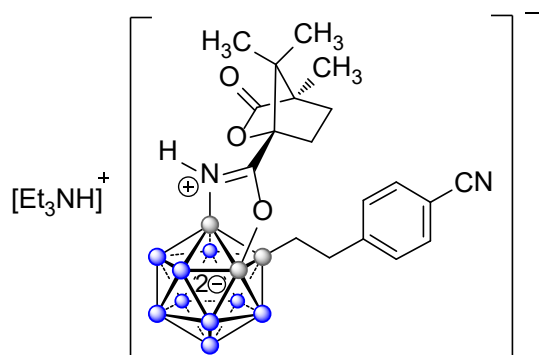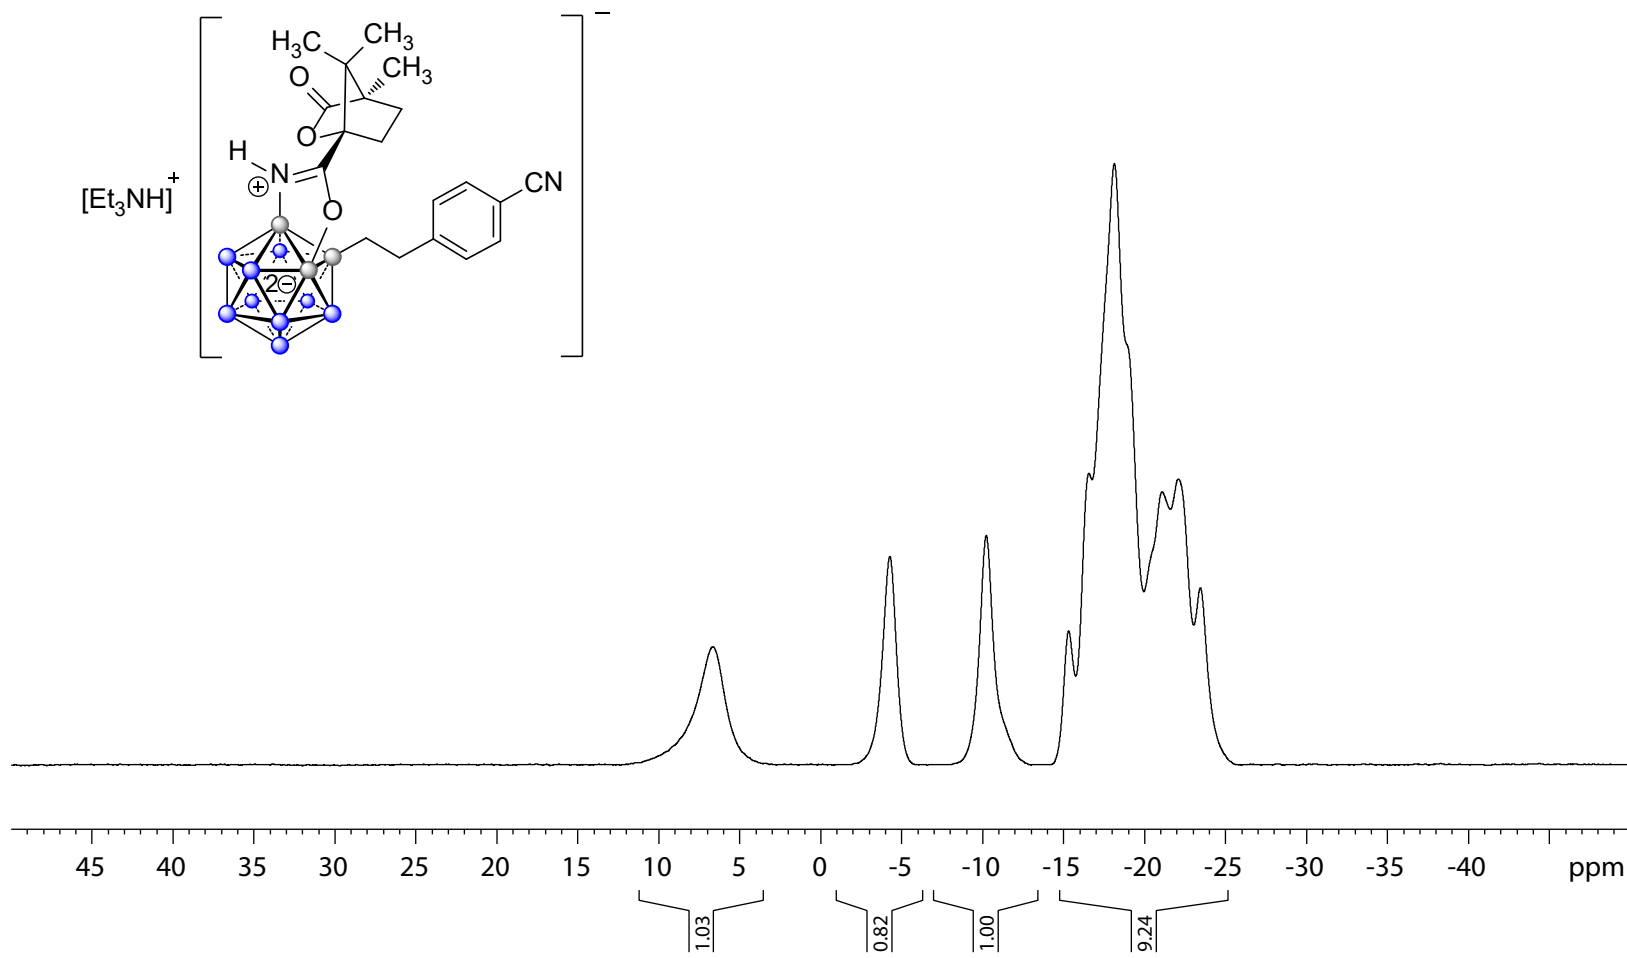

20190921-B12C-4CNStyr 20 mg white solid [Et<sub>3</sub>NH][B<sub>12</sub>H<sub>10</sub>NHCO(Camphanic)CH<sub>2</sub>CH<sub>2</sub>C<sub>6</sub>H<sub>4</sub>-4CN] dissolved in 0.6 mL acetone-d<sub>6</sub>\*

<sup>11</sup>B{<sup>1</sup>H} NMR 128 MHz

Current Data Parameters  
NAME 20190921-RV-B12C-4CNStyr  
EXPNO 4  
PROCNO 1

F2 - Acquisition Parameters  
Date\_ 20190921  
Time 17.05  
INSTRUM spect  
PROBHD 5 mm PABBO BB/  
PULPROG zgpg30  
TD 65536  
SOLVENT Acetone  
NS 128  
DS 4  
SWH 25510.203 Hz  
FIDRES 0.389255 Hz  
AQ 1.2845056 sec  
RG 193.34  
DW 19.600 usec  
DE 6.50 usec  
TE 296.9 K  
D1 1.00000000 sec  
D11 0.03000000 sec  
TD0 1

===== CHANNEL f1 =====  
NUC1 11B  
P1 9.93 usec  
PLW1 52.96599960 W  
SFO1 128.3776050 MHz

===== CHANNEL f2 =====  
CPDPRG[2] waltz16  
NUC2 1H  
PCPD2 80.00 usec  
PLW2 12.50000000 W  
PLW12 0.43945000 W  
PLW13 0.28125000 W  
SFO2 400.1320007 MHz

F2 - Processing parameters  
SI 32768  
SF 128.3776050 MHz  
WDW EM  
SSB 0  
LB 10.00 Hz  
GB 0  
PC 1.40

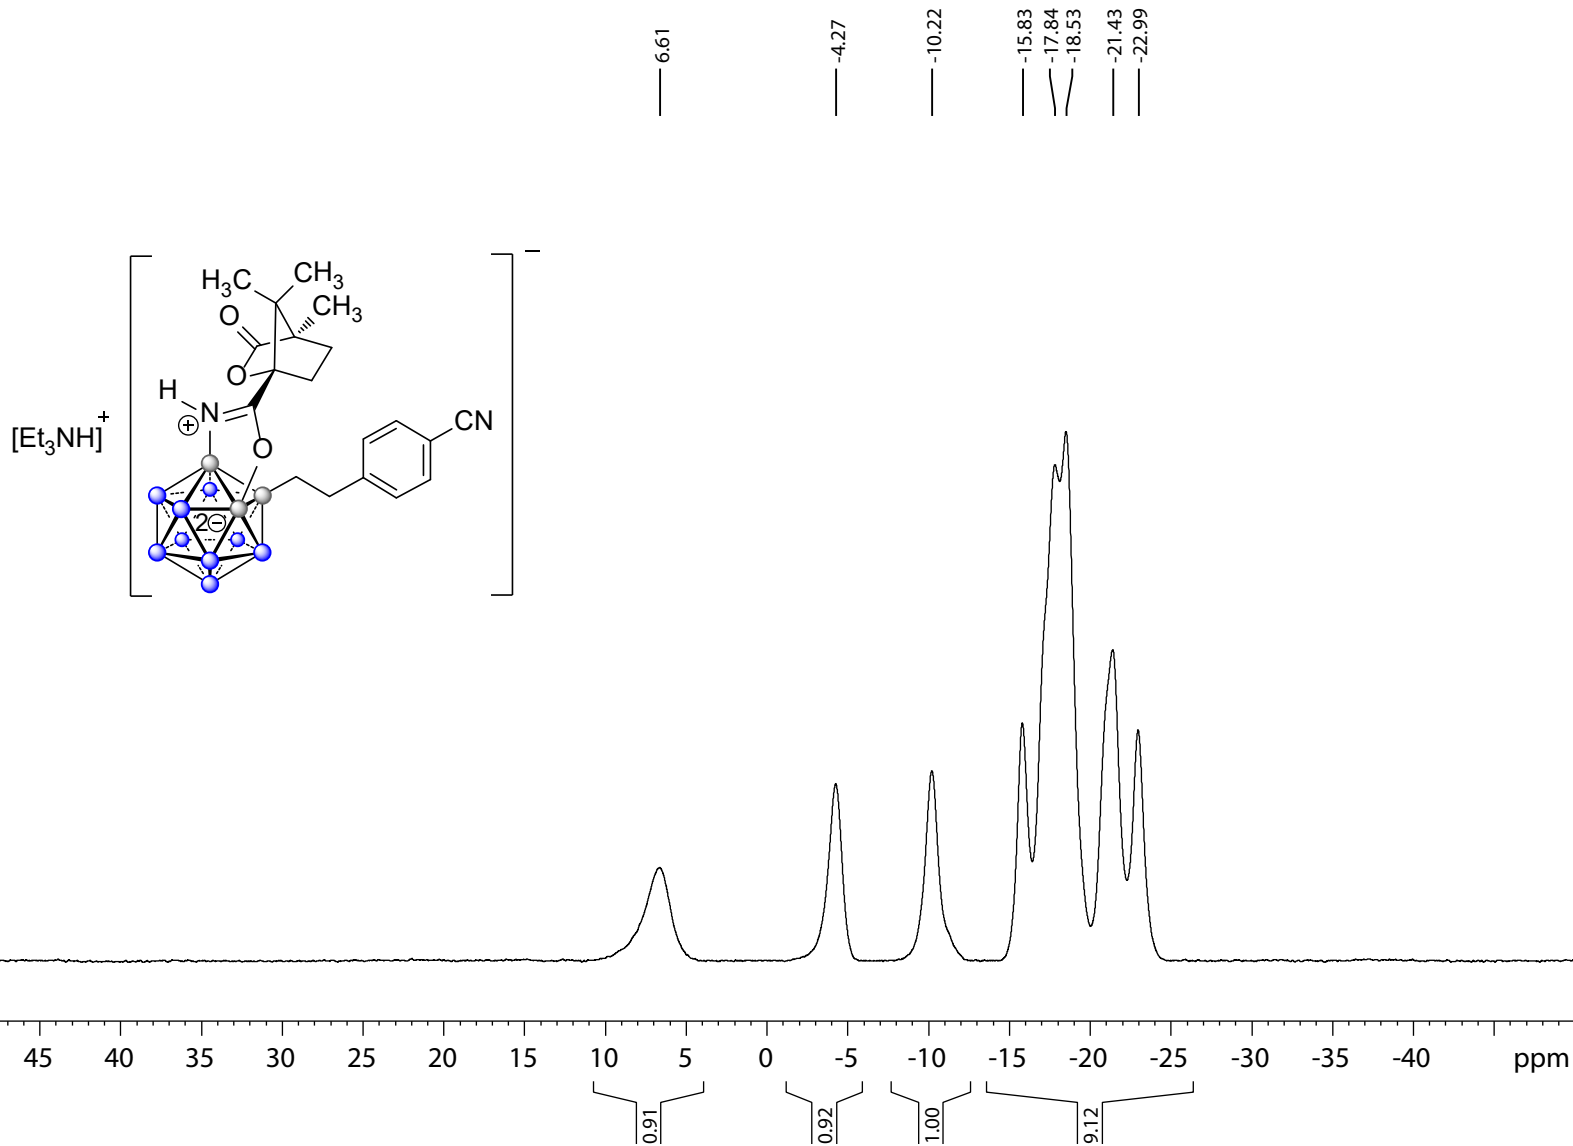

20190921-B12C-4CNStyr 20 mg white solid [Et<sub>3</sub>NH][B<sub>12</sub>H<sub>10</sub>NHCO(Camphanic)CH<sub>2</sub>CH<sub>2</sub>C<sub>6</sub>H<sub>4</sub>-4CN] dissolved in 0.6 mL acetone-d<sub>6</sub>\*

<sup>13</sup>C{<sup>1</sup>H} NMR 100 MHz

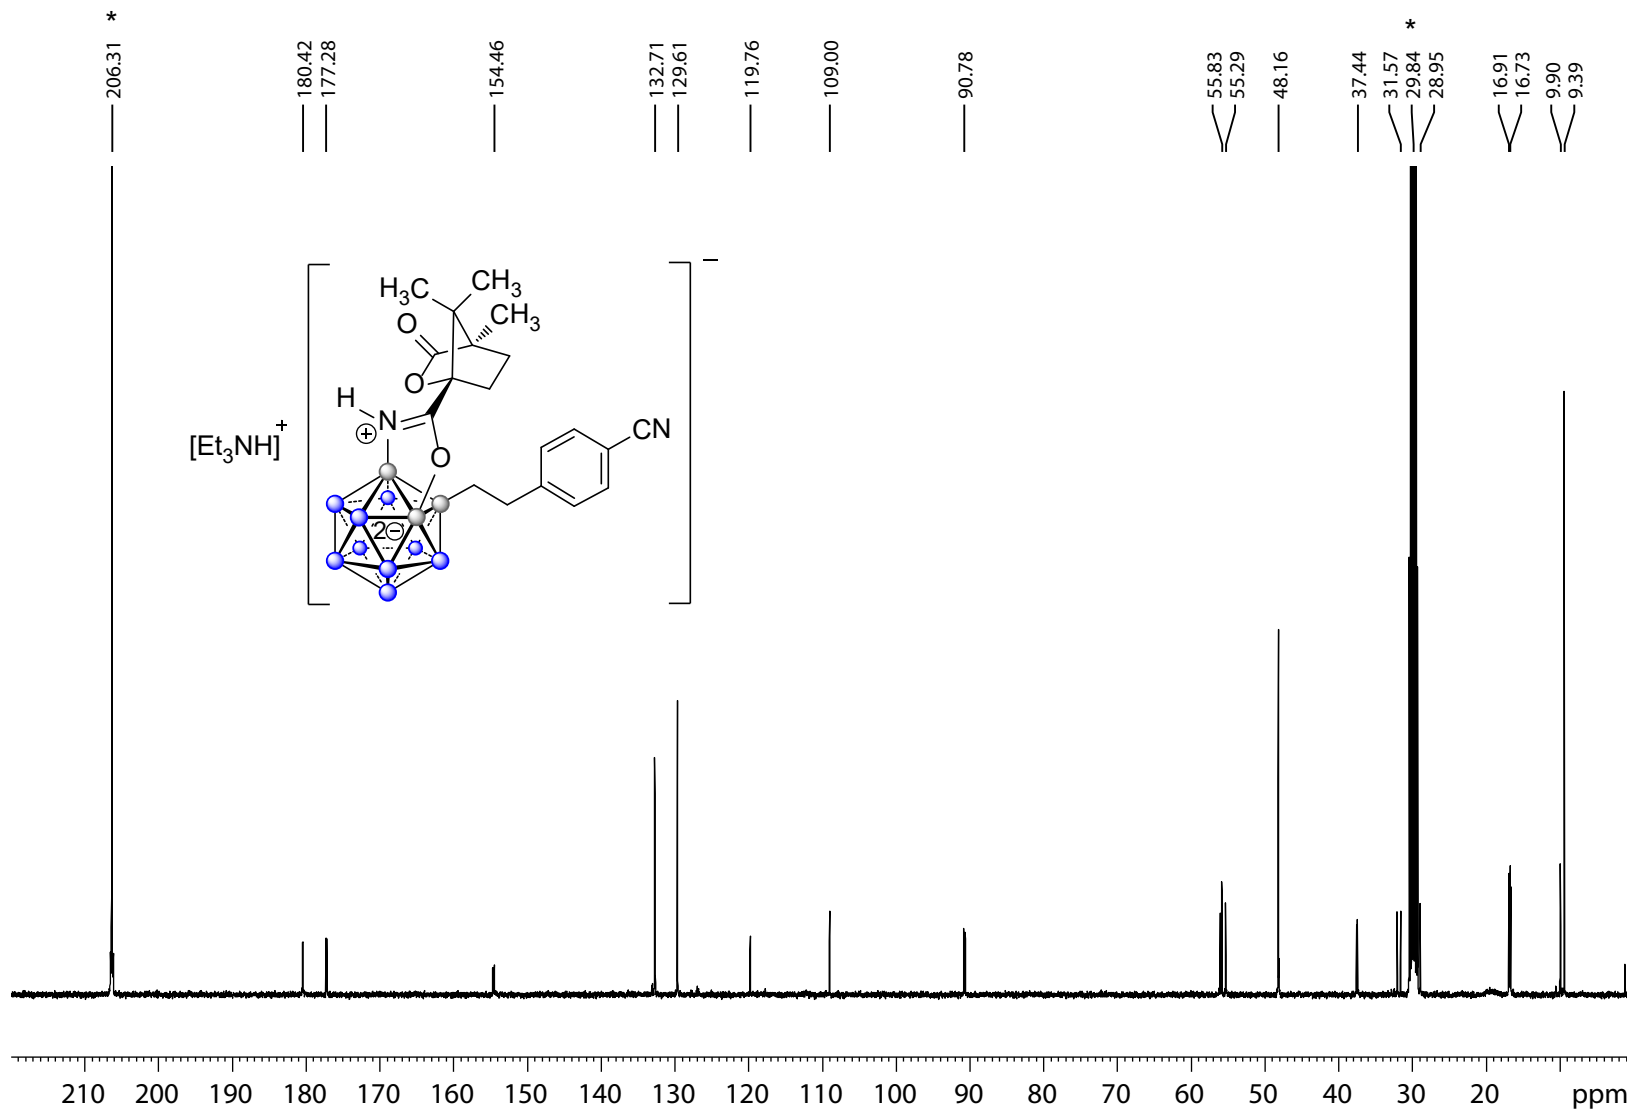

Current Data Parameters  
 NAME 20190921-RV-B12C-4CNStyr  
 EXPNO 5  
 PROCNO 1

F2 - Acquisition Parameters  
 Date\_ 20190921  
 Time\_ 18.38  
 INSTRUM spect  
 PROBHD 5 mm PABBO BB/  
 PULPROG zgpg30  
 TD 65536  
 SOLVENT Acetone  
 NS 2048  
 DS 4  
 SWH 29761.904 Hz  
 FIDRES 0.454131 Hz  
 AQ 1.1010048 sec  
 RG 193.34  
 DW 16.800 usec  
 DE 6.50 usec  
 TE 296.6 K  
 D1 1.50000000 sec  
 D11 0.03000000 sec  
 TD0 1

===== CHANNEL f1 =====  
 NUC1 13C  
 P1 10.00 usec  
 PLW1 53.00000000 W  
 SFO1 100.6228293 MHz

===== CHANNEL f2 =====  
 CPDPRG[2] waltz16  
 NUC2 1H  
 PCPD2 80.00 usec  
 PLW2 12.50000000 W  
 PLW12 0.43945000 W  
 PLW13 0.28125000 W  
 SFO2 400.1316005 MHz

F2 - Processing parameters  
 SI 32768  
 SF 100.6126859 MHz  
 WDW EM  
 SSB 0  
 LB 1.00 Hz  
 GB 0  
 PC 1.40

20190921-B12C-4CNStyr 20 mg white solid [Et<sub>3</sub>NH][B<sub>12</sub>H<sub>10</sub>NHCO(Camphanic)CH<sub>2</sub>CH<sub>2</sub>C<sub>6</sub>H<sub>4</sub>-4CN] dissolved in 0.6 mL acetone-d<sub>6</sub>\*

<sup>13</sup>CDEPT NMR 100 MHz

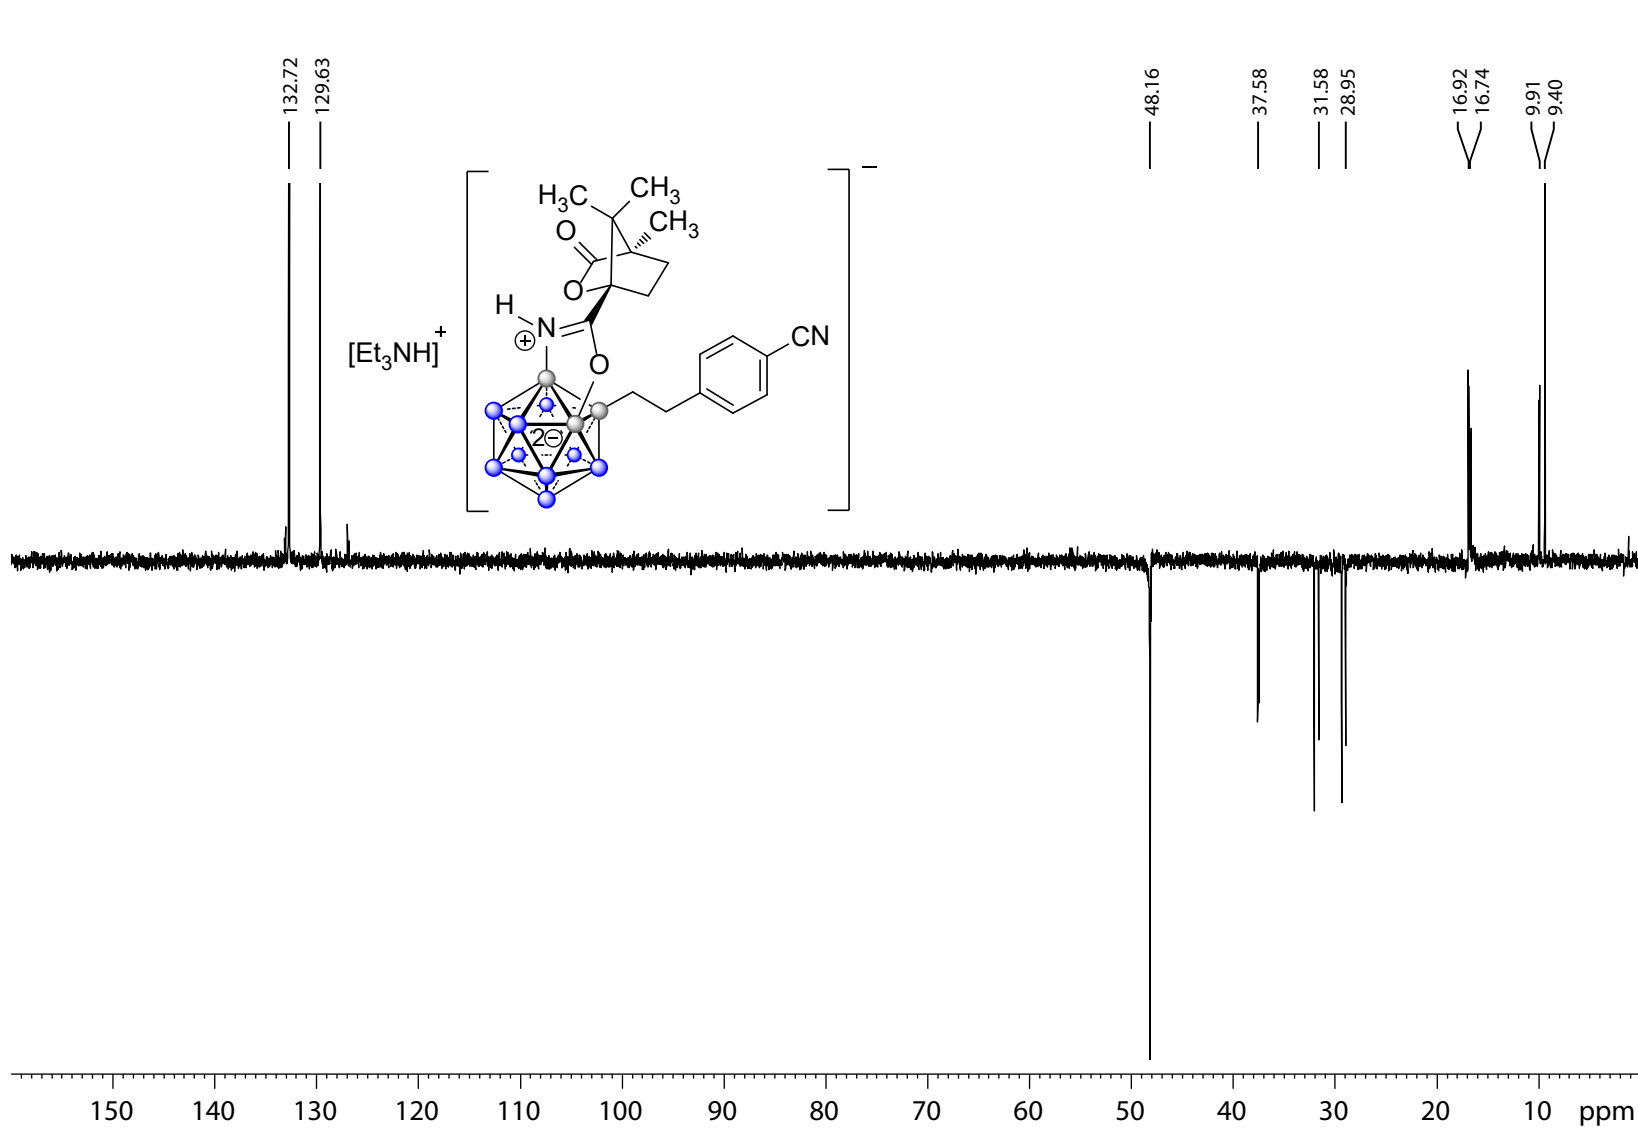

Current Data Parameters  
 NAME 20190921-RV-B12C-4CNStyr  
 EXPNO 6  
 PROCNO 1

F2 - Acquisition Parameters  
 Date\_ 20190921  
 Time\_ 19.06  
 INSTRUM spect  
 PROBHD 5 mm PABBO BB/  
 PULPROG dept135  
 TD 65536  
 SOLVENT Acetone  
 NS 512  
 DS 4  
 SWH 29296.875 Hz  
 FIDRES 0.447035 Hz  
 AQ 1.1184810 sec  
 RG 193.34  
 DW 17.067 usec  
 DE 6.50 usec  
 TE 296.5 K  
 CNST2 145.0000000  
 D1 2.00000000 sec  
 D2 0.00344828 sec  
 D12 0.00002000 sec  
 TD0 1

===== CHANNEL f1 =====  
 NUC1 13C  
 P1 10.00 usec  
 P2 20.00 usec  
 PLW1 53.00000000 W  
 SFO1 100.6228293 MHz

===== CHANNEL f2 =====  
 CPDPRG[2] waltz16  
 NUC2 1H  
 P3 15.00 usec  
 P4 30.00 usec  
 PCPD2 80.00 usec  
 PLW2 12.50000000 W  
 PLW12 0.43945000 W  
 SFO2 400.1316005 MHz

F2 - Processing parameters  
 SI 32768  
 SF 100.6126850 MHz  
 WDW EM  
 SSB 0  
 LB 1.00 Hz  
 GB 0  
 PC 4.00

$^1\text{H} - ^1\text{H}$  COSY NMR

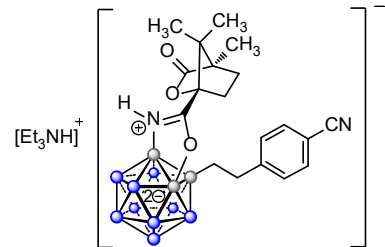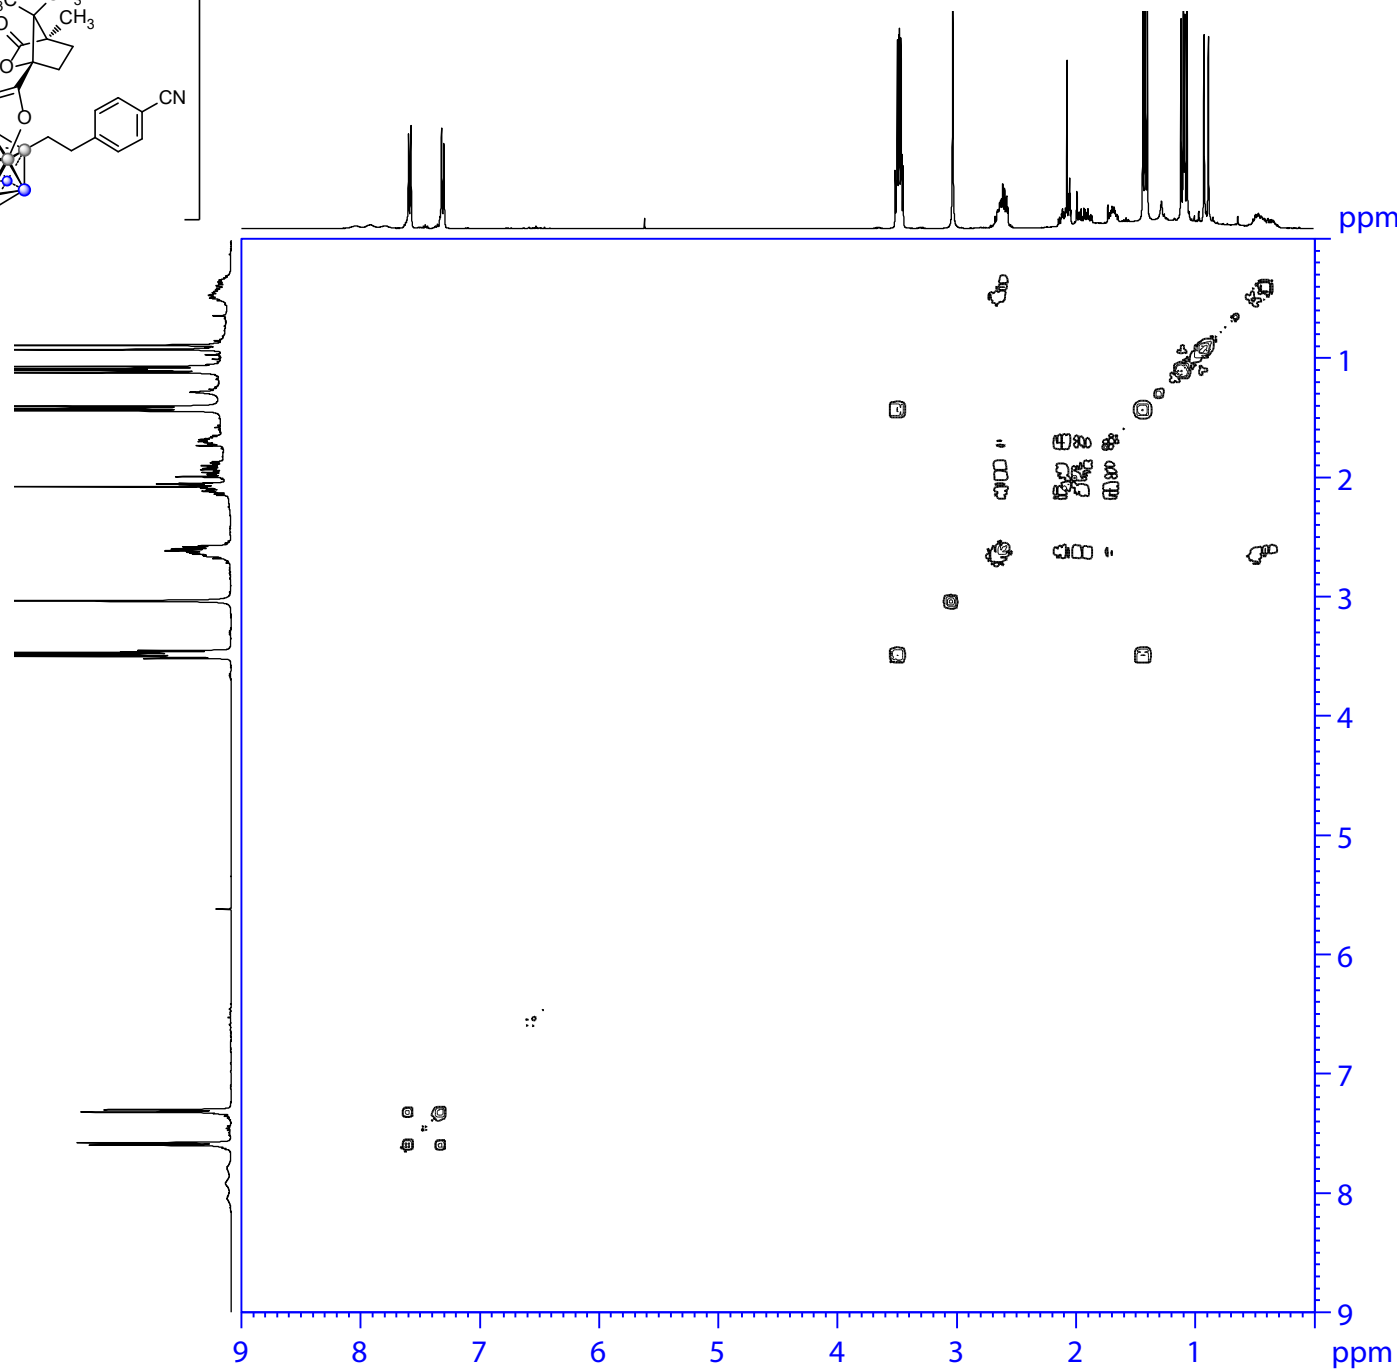

Current Data Parameters  
 NAME 20190921-RV-B12C-4CNStyr  
 EXPNO 8  
 PROCNO 1

F2 - Acquisition Parameters  
 Date 20190921  
 Time 19.23  
 INSTRUM spect  
 PROBHD 5 mm PABBO BB/  
 PULPROG cosygpppqf  
 TD 2048  
 SOLVENT Acetone  
 NS 2  
 DS 8  
 SWH 5341.880 Hz  
 FIDRES 2.608340 Hz  
 AQ 0.1916928 sec  
 RG 124.48  
 DW 93.600 usec  
 DE 6.50 usec  
 TE 296.0 K  
 D0 0.0000300 sec  
 D1 2.0000000 sec  
 D11 0.03000000 sec  
 D12 0.00002000 sec  
 D13 0.00000400 sec  
 D16 0.00020000 sec  
 INO 0.00018720 sec

==== CHANNEL f1 =====  
 NUC1 1H  
 P0 15.00 usec  
 P1 15.00 usec  
 P17 2500.00 usec  
 PLW1 12.5000000 W  
 PLW10 4.16050005 W  
 SF01 400.1324057 MHz

===== GRADIENT CHANNEL =====  
 GPNAM[1] SMSQ10.100  
 GPZ1 10.00 %  
 P16 1000.00 usec

F1 - Acquisition parameters  
 TD 128  
 SF01 400.1324 MHz  
 FIDRES 83.466881 Hz  
 SW 13.350 ppm  
 FnmODE QF

F2 - Processing parameters  
 SI 1024  
 SF 400.1300000 MHz  
 WDW QSINE  
 SSB 0  
 LB 0 Hz  
 GB 0  
 PC 1.40

F1 - Processing parameters  
 SI 1024  
 MC2 QF  
 SF 400.1300000 MHz  
 WDW QSINE  
 SSB 0  
 LB 0 Hz  
 GB 0



<sup>1</sup>H - <sup>13</sup>C HSQC NMR

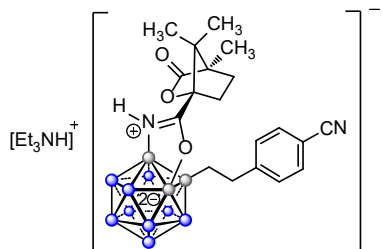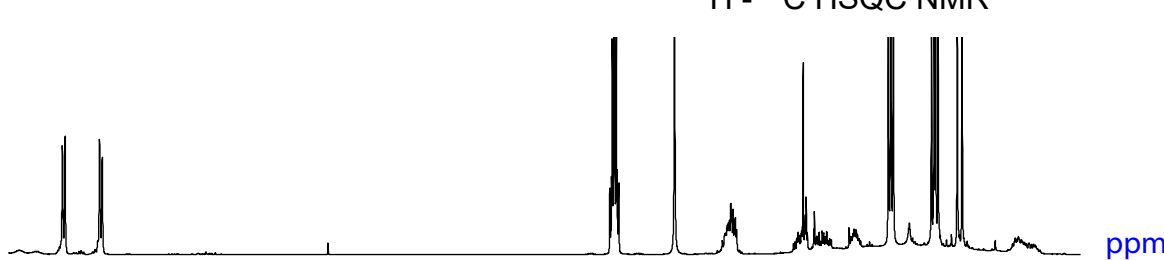

Current Data Parameters  
 NAME 20190921-RV-B12C-4CNStyr  
 EXPNO 7  
 PROCNO 1

F2 - Acquisition Parameters  
 Date\_ 20190921  
 Time\_ 19.08  
 INSTRUM spect  
 PROBHD 5 mm PABBO BB/  
 PULPROG hsqcetgps12  
 TD 1024  
 SOLVENT Acetone  
 NS 2  
 DS 16  
 SWH 6009.615 Hz  
 FIDRES 5.868765 Hz  
 AQ 0.0851968 sec  
 RG 193.34  
 DW 83.200 usec  
 DE 6.50 usec  
 TE 296.4 K  
 CNST2 145.0000000  
 D0 0.00000300 sec  
 D1 1.50000000 sec  
 D4 0.00172414 sec  
 D11 0.03000000 sec  
 D16 0.00020000 sec  
 D24 0.00086207 sec  
 IN0 0.00001990 sec  
 ZGPGTNS

===== CHANNEL f1 =====  
 NUC1 1H  
 P1 15.00 usec  
 P2 30.00 usec  
 P28 1000.00 usec  
 PLW1 12.50000000 W  
 SFO1 400.1328009 MHz

===== CHANNEL f2 =====  
 CPDPRG[2] garp  
 NUC2 13C  
 P3 10.00 usec  
 P4 20.00 usec  
 PCPD2 70.00 usec  
 PLW2 53.00000000 W  
 PLW12 1.08159995 W  
 SFO2 100.6238364 MHz

===== GRADIENT CHANNEL =====  
 GPNAM[1] SMSQ10.100  
 GPNAM[2] SMSQ10.100  
 GPNAM[3] SMSQ10.100  
 GPNAM[4] SMSQ10.100  
 GPZ1 80.00 %  
 GPZ2 20.10 %  
 GPZ3 11.00 %  
 GPZ4 -5.00 %  
 P16 1000.00 usec  
 P19 600.00 usec

F1 - Acquisition parameters  
 TD 256  
 SFO1 100.6238 MHz  
 FIDRES 196.524048 Hz  
 SW 249.991 ppm  
 FhMODE Echo-Antiecho

F2 - Processing parameters  
 SI 1024  
 SF 400.1300000 MHz  
 WDW QSINE  
 SSB 2  
 LB 0 Hz  
 GB 0  
 PC 1.40

F1 - Processing parameters  
 SI 1024  
 MC2 echo-antiecho  
 SF 100.6127690 MHz  
 WDW QSINE  
 SSB 2  
 LB 0 Hz  
 GB 0

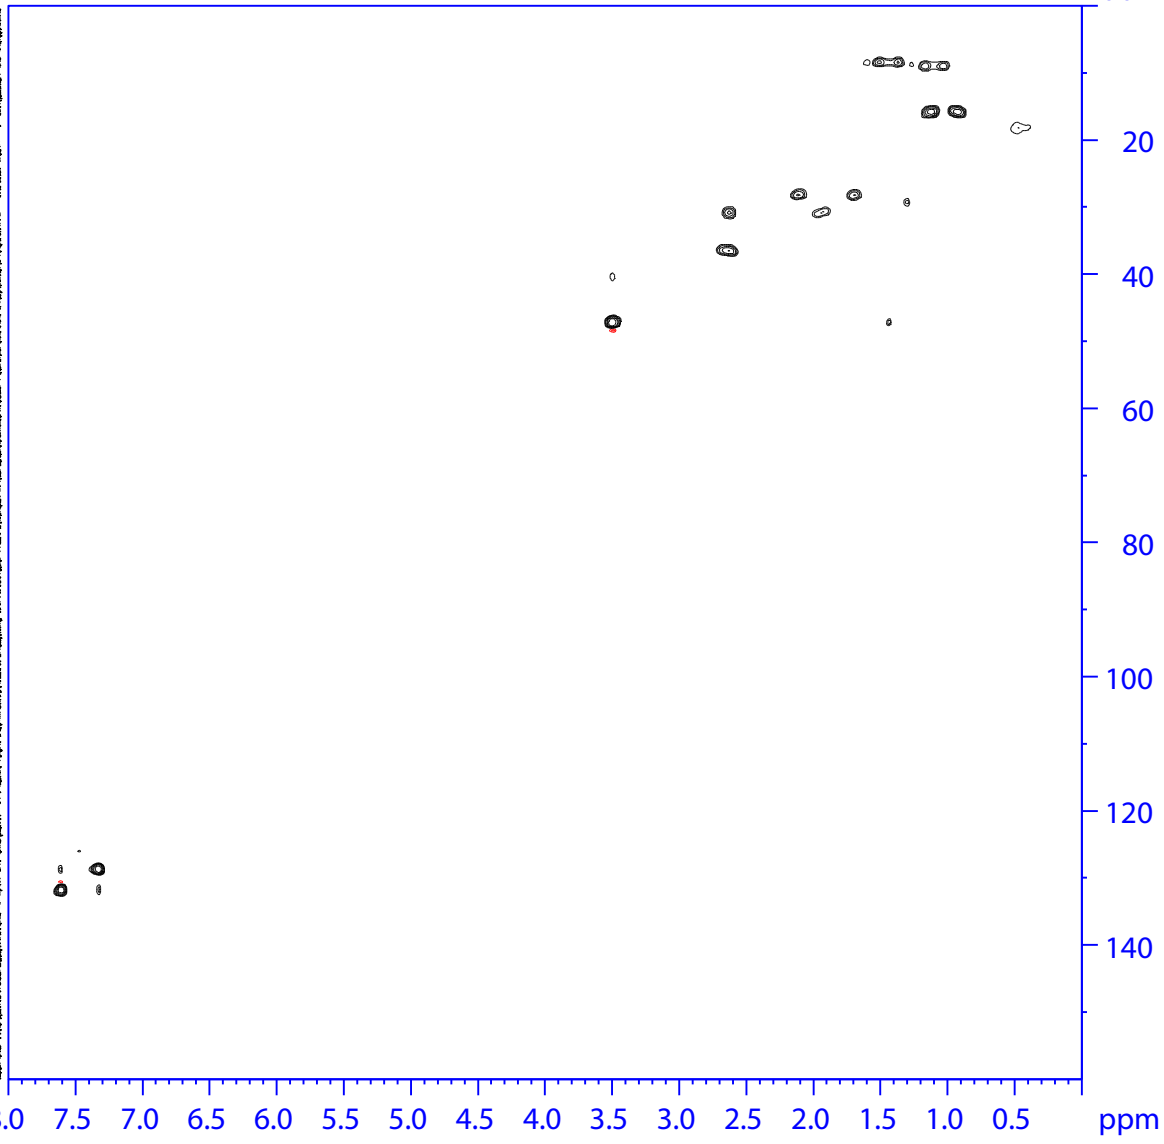

20191001-B12C-4tBuStyr 20 mg white solid  $[\text{Et}_3\text{NH}][\text{B}_{12}\text{H}_{10}\text{NHCO}(\text{Camphanic})\text{CH}_2\text{CH}_2\text{C}_6\text{H}_4\text{-tBu}]$  dissolved in 0.6 mL acetone- $d_6$ \*

400MHz  $^1\text{H}$  NMR,  $\circ$  deuterated solvent residual peak= 2.05 ppm;  $\diamond$  water peak

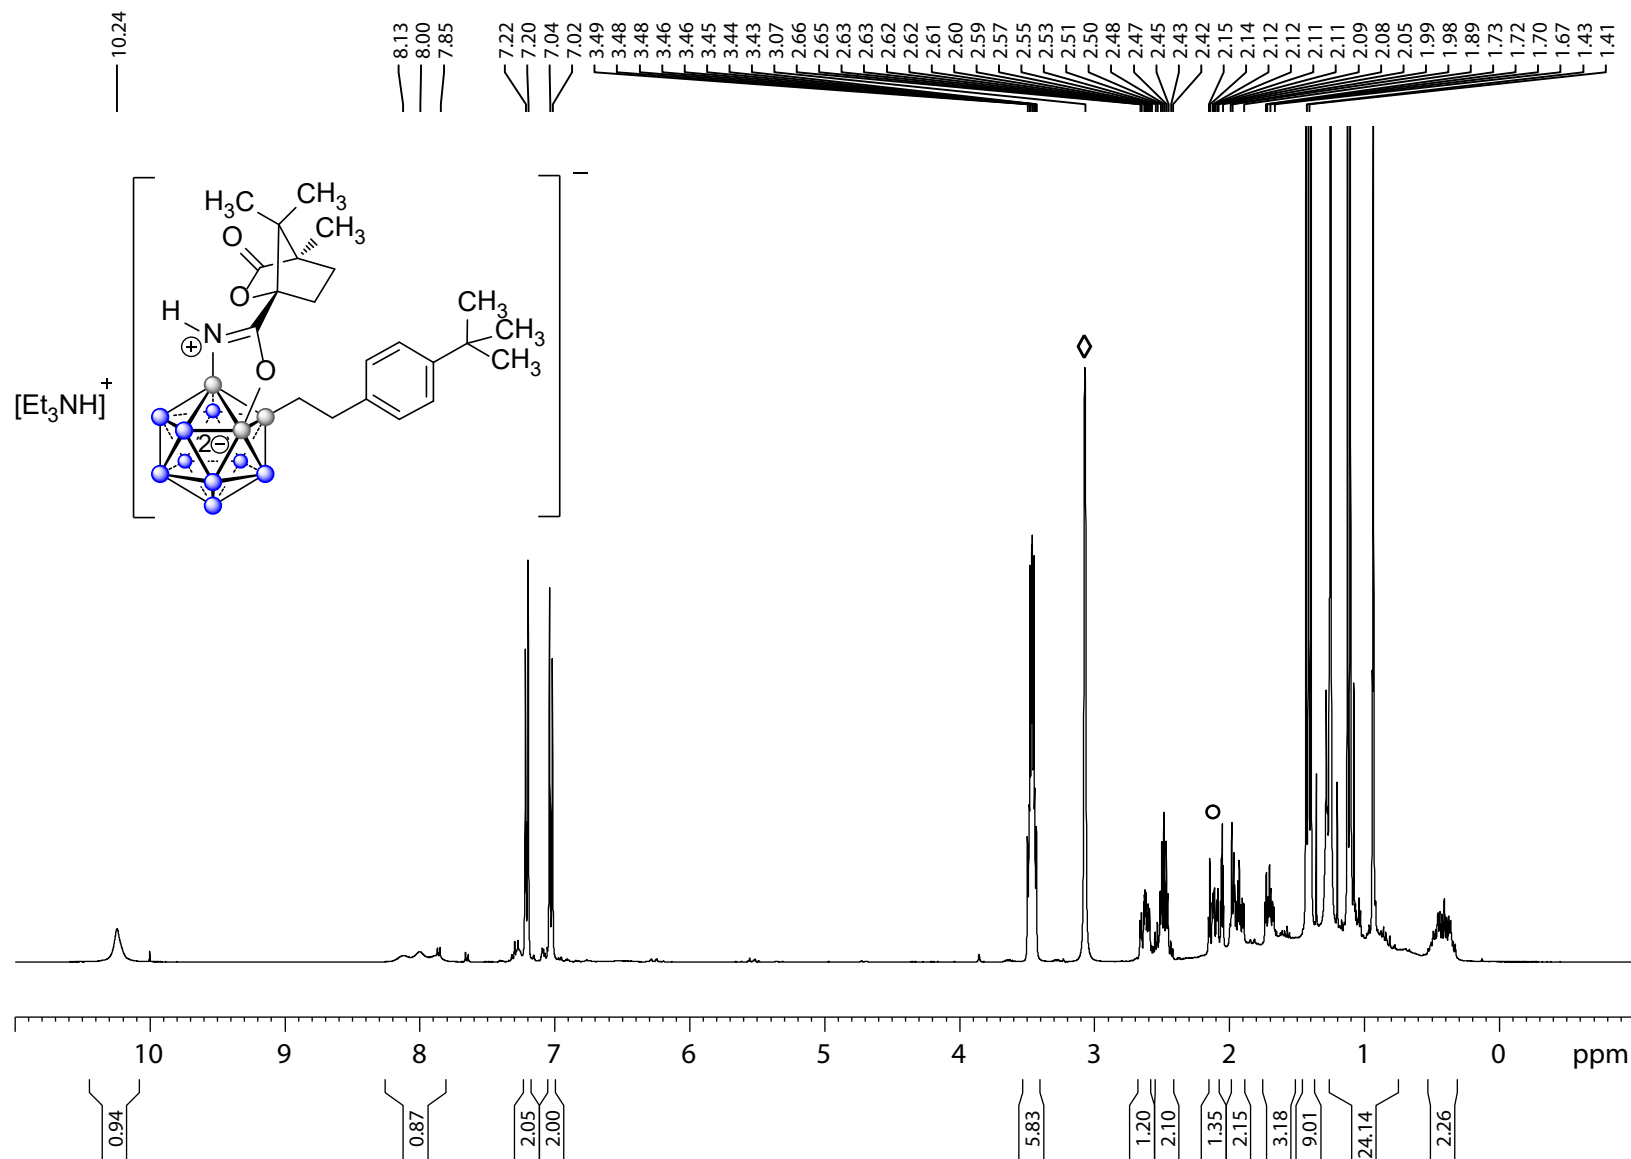

Current Data Parameters  
 NAME 20191001-RV-B12C-4tBuStyr  
 EXPNO 1  
 PROCNO 1

F2 - Acquisition Parameters  
 Date\_ 20191002  
 Time\_ 1.16  
 INSTRUM spect  
 PROBHD 5 mm PABBO BB/  
 PULPROG zg30  
 TD 65536  
 SOLVENT Acetone  
 NS 16  
 DS 2  
 SWH 10000.000 Hz  
 FIDRES 0.152588 Hz  
 AQ 3.2767999 sec  
 RG 36.87  
 DW 50.000 usec  
 DE 6.50 usec  
 TE 295.8 K  
 D1 1.00000000 sec  
 TD0 1

===== CHANNEL f1 =====  
 NUC1 1H  
 P1 15.00 usec  
 PLW1 12.50000000 W  
 SFO1 400.1328009 MHz

F2 - Processing parameters  
 SI 65536  
 SF 400.1300071 MHz  
 WDW EM  
 SSB 0  
 LB 0.30 Hz  
 GB 0  
 PC 1.00

20191001-B12C-4tBuStyr 20 mg white solid  $[\text{Et}_3\text{NH}][\text{B}_{12}\text{H}_{10}\text{NHCO}(\text{Camphanic})\text{CH}_2\text{CH}_2\text{C}_6\text{H}_4\text{-tBu}]$  dissolved in 0.6 mL acetone- $d_6^*$

400MHz  $^1\text{H}\{\text{B}\}$  NMR,  $\circ$  deuterated solvent residual peak= 2.05 ppm;  $\diamond$  water peak

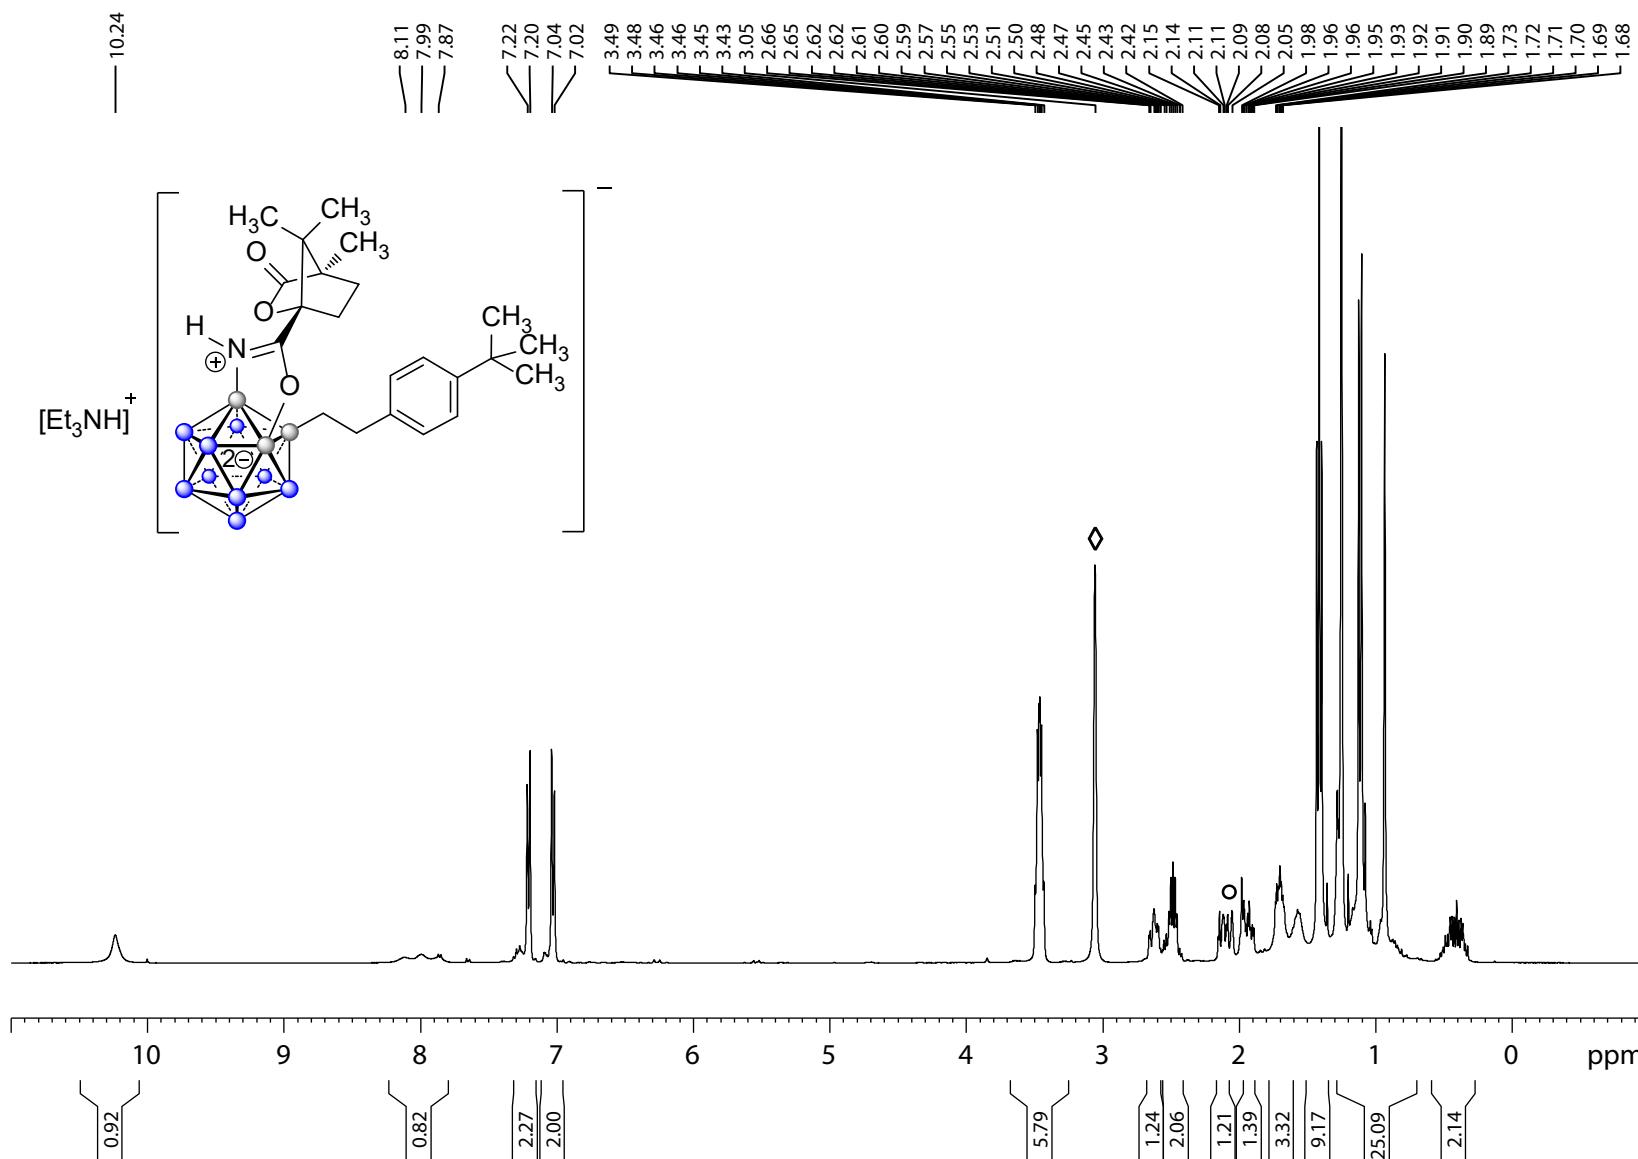

Current Data Parameters  
 NAME 20191001-RV-B12C-4tBuStyr  
 EXPNO 2  
 PROCNO 1

F2 - Acquisition Parameters  
 Date\_ 20191002  
 Time\_ 1.17  
 INSTRUM spect  
 PROBHD 5 mm PABBO BB/  
 PULPROG zgig30  
 TD 16384  
 SOLVENT Acetone  
 NS 16  
 DS 4  
 SWH 8012.820 Hz  
 FIDRES 0.489064 Hz  
 AQ 1.0223616 sec  
 RG 36.87  
 DW 62.400 usec  
 DE 6.50 usec  
 TE 295.9 K  
 D1 1.00000000 sec  
 D11 0.03000000 sec  
 TD0 1

===== CHANNEL f1 =====  
 NUC1 1H  
 P1 15.00 usec  
 PLW1 12.50000000 W  
 SFO1 400.1320007 MHz

===== CHANNEL f2 =====  
 CPDPRG[2] garp4  
 NUC2 11B  
 PCPD2 90.00 usec  
 PLW2 52.96599960 W  
 PLW12 0.64477998 W  
 SFO2 128.3776050 MHz

F2 - Processing parameters  
 SI 32768  
 SF 400.1300074 MHz  
 WDW EM  
 SSB 0  
 LB 1.00 Hz  
 GB 0  
 PC 1.40

20191001-B12C-4tBuStyr 20 mg white solid  $[\text{Et}_3\text{NH}][\text{B}_{12}\text{H}_{10}\text{NHCO}(\text{Camphanic})\text{CH}_2\text{CH}_2\text{C}_6\text{H}_4\text{-tBu}]$  dissolved in 0.6 mL acetone- $d_6^*$

$^{11}\text{B}$  NMR 128 MHz

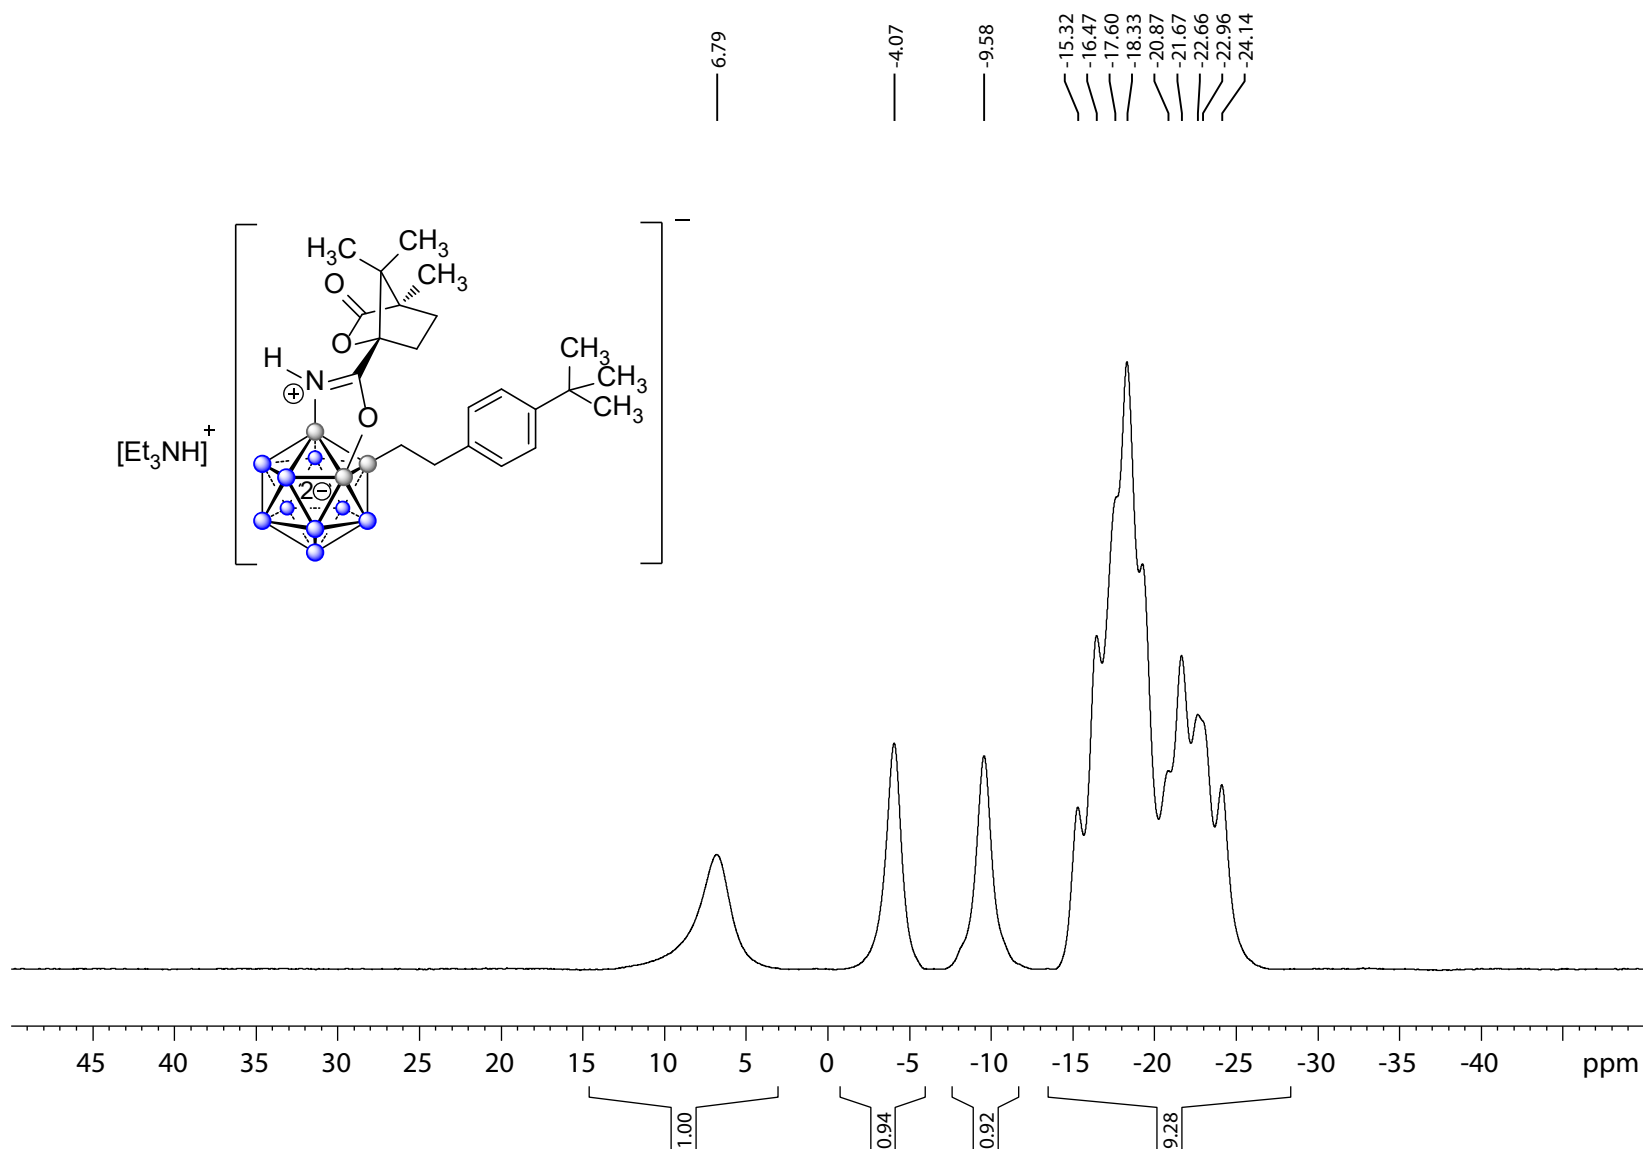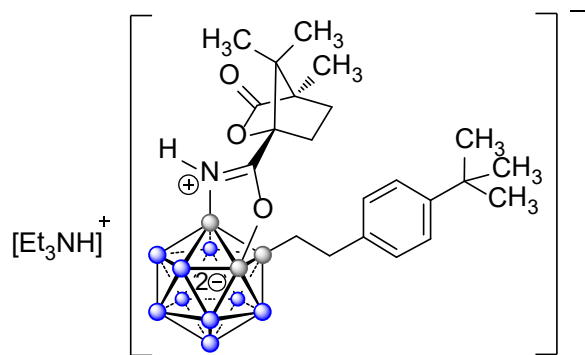

Current Data Parameters  
 NAME 20191001-RV-B12C-4tBuStyr  
 EXPNO 3  
 PROCNO 1

F2 - Acquisition Parameters  
 Date\_ 20191002  
 Time\_ 1.23  
 INSTRUM spect  
 PROBHD 5 mm PABBO BB/  
 PULPROG zg  
 TD 65536  
 SOLVENT Acetone  
 NS 128  
 DS 4  
 SWH 25510.203 Hz  
 FIDRES 0.389255 Hz  
 AQ 1.2845056 sec  
 RG 193.34  
 DW 19.600 usec  
 DE 6.50 usec  
 TE 295.9 K  
 D1 1.0000000 sec  
 TD0 1

==== CHANNEL f1 =====  
 NUC1 11B  
 P1 9.93 usec  
 PLW1 52.96599960 W  
 SFO1 128.3776052 MHz

F2 - Processing parameters  
 SI 32768  
 SF 128.3776050 MHz  
 WDW EM  
 SSB 0  
 LB 10.00 Hz  
 GB 0  
 PC 1.40

20191001-B12C-4tBuStyr 20 mg white solid  $[\text{Et}_3\text{NH}][\text{B}_{12}\text{H}_{10}\text{NHCO}(\text{Camphanic})\text{CH}_2\text{CH}_2\text{C}_6\text{H}_4\text{-tBu}]$  dissolved in 0.6 mL acetone- $d_6^*$

$^{11}\text{B}\{^1\text{H}\}$  NMR 128 MHz

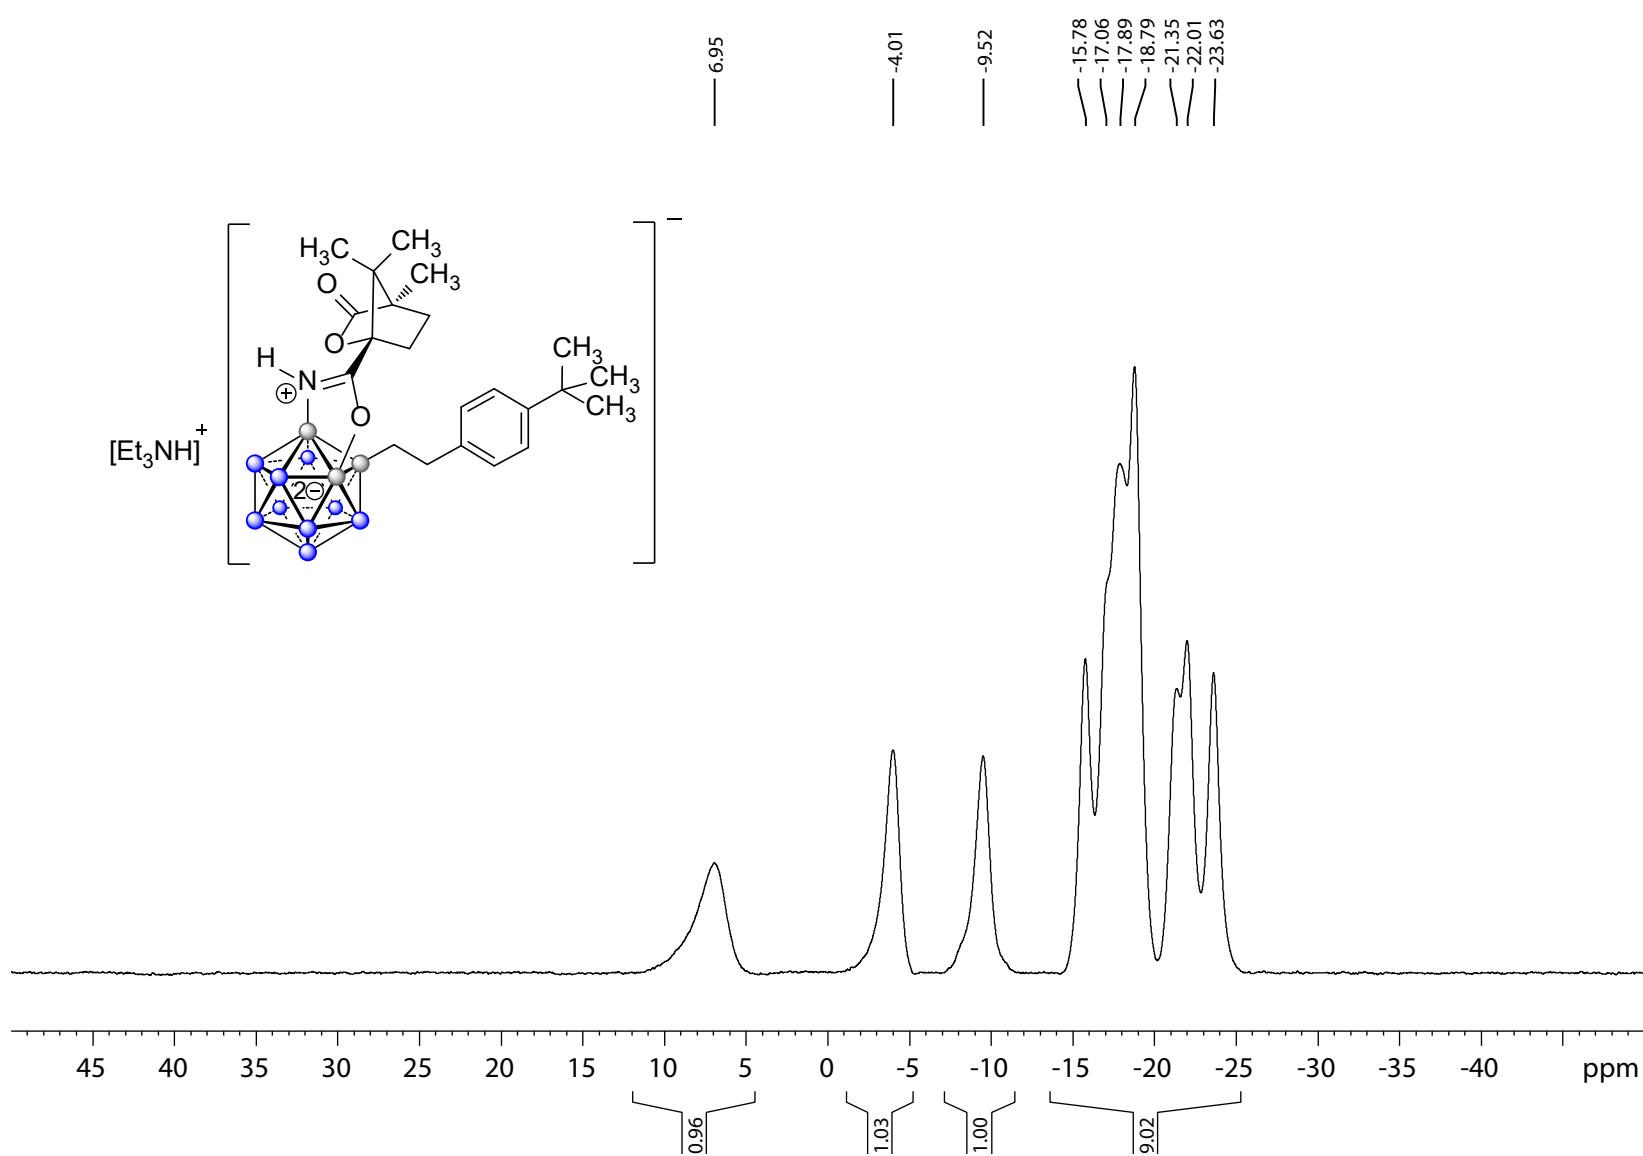

Current Data Parameters  
 NAME 20191001-RV-B12C-4tBuStyr  
 EXPNO 4  
 PROCNO 1

F2 - Acquisition Parameters  
 Date\_ 20191002  
 Time\_ 1.29  
 INSTRUM spect  
 PROBHD 5 mm PABBO BB/  
 PULPROG zgpg30  
 TD 65536  
 SOLVENT Acetone  
 NS 128  
 DS 4  
 SWH 25510.203 Hz  
 FIDRES 0.389255 Hz  
 AQ 1.2845056 sec  
 RG 193.34  
 DW 19.600 usec  
 DE 6.50 usec  
 TE 296.9 K  
 D1 1.00000000 sec  
 D11 0.03000000 sec  
 TD0 1

==== CHANNEL f1 =====  
 NUC1 11B  
 P1 9.93 usec  
 PLW1 52.96599960 W  
 SFO1 128.3776050 MHz

==== CHANNEL f2 =====  
 CPDPRG[2] waltz16  
 NUC2 1H  
 PCPD2 80.00 usec  
 PLW2 12.50000000 W  
 PLW12 0.43945000 W  
 PLW13 0.28125000 W  
 SFO2 400.1320007 MHz

F2 - Processing parameters  
 SI 32768  
 SF 128.3776050 MHz  
 WDW EM  
 SSB 0  
 LB 10.00 Hz  
 GB 0  
 PC 1.40

20191001-B12C-4tBuStyr 20 mg white solid [Et<sub>3</sub>NH][B<sub>12</sub>H<sub>10</sub>NHCO(Camphanic)CH<sub>2</sub>CH<sub>2</sub>C<sub>6</sub>H<sub>4</sub>-tBu] dissolved in 0.6 mL acetone-d<sub>6</sub>\*

<sup>13</sup>C{<sup>1</sup>H} NMR 100 MHz

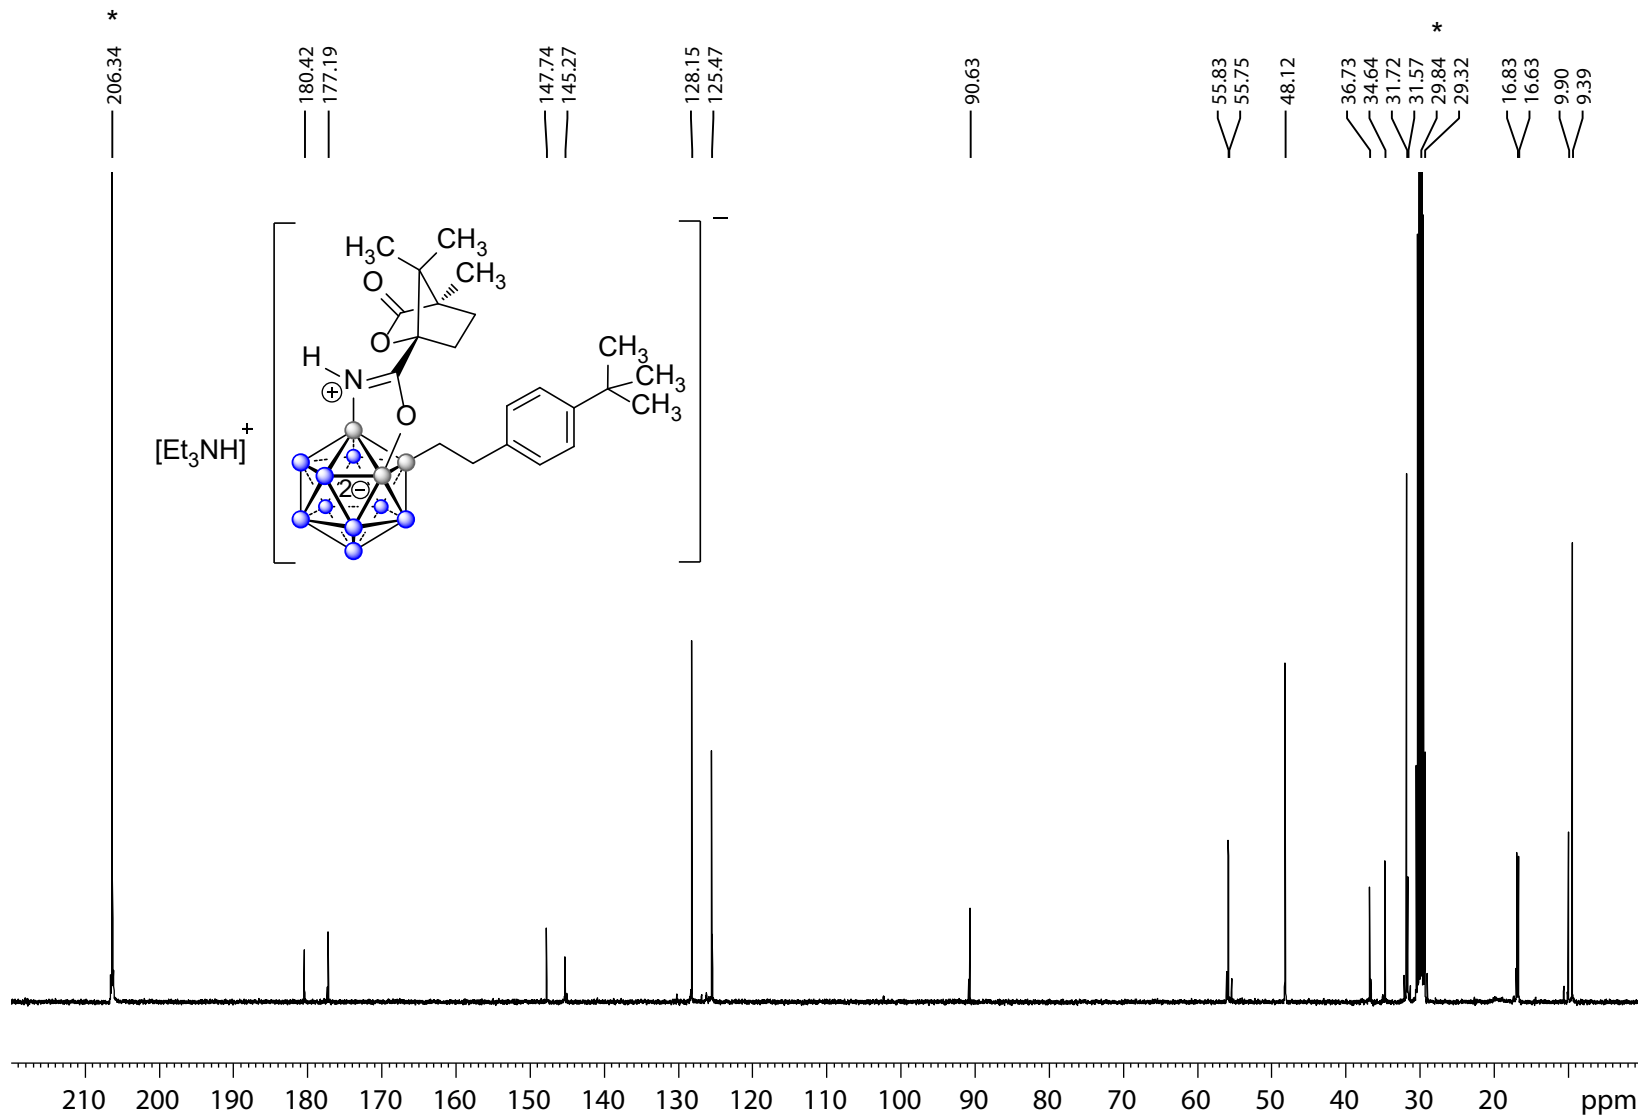

Current Data Parameters  
 NAME 20191001-RV-B12C-4tBuStyr  
 EXPNO 5  
 PROCNO 1

F2 - Acquisition Parameters  
 Date\_ 20191002  
 Time\_ 3.02  
 INSTRUM spect  
 PROBHD 5 mm PABBO BB/  
 PULPROG zgpg30  
 TD 65536  
 SOLVENT Acetone  
 NS 2048  
 DS 4  
 SWH 29761.904 Hz  
 FIDRES 0.454131 Hz  
 AQ 1.1010048 sec  
 RG 193.34  
 DW 16.800 usec  
 DE 6.50 usec  
 TE 296.6 K  
 D1 1.50000000 sec  
 D11 0.03000000 sec  
 TD0 1

===== CHANNEL f1 =====  
 NUC1 13C  
 P1 10.00 usec  
 PLW1 53.00000000 W  
 SFO1 100.6228293 MHz

===== CHANNEL f2 =====  
 CPDPRG[2] waltz16  
 NUC2 1H  
 PCPD2 80.00 usec  
 PLW2 12.50000000 W  
 PLW12 0.43945000 W  
 PLW13 0.28125000 W  
 SFO2 400.1316005 MHz

F2 - Processing parameters  
 SI 32768  
 SF 100.6126874 MHz  
 WDW EM  
 SSB 0  
 LB 1.00 Hz  
 GB 0  
 PC 1.40

20191001-B12C-4tBuStyr 20 mg white solid  $[\text{Et}_3\text{NH}][\text{B}_{12}\text{H}_{10}\text{NHCO}(\text{Camphanic})\text{CH}_2\text{CH}_2\text{C}_6\text{H}_4\text{-tBu}]$  dissolved in 0.6 mL acetone- $d_6^*$

$^{13}\text{CDEPT}$  NMR 100 MHz

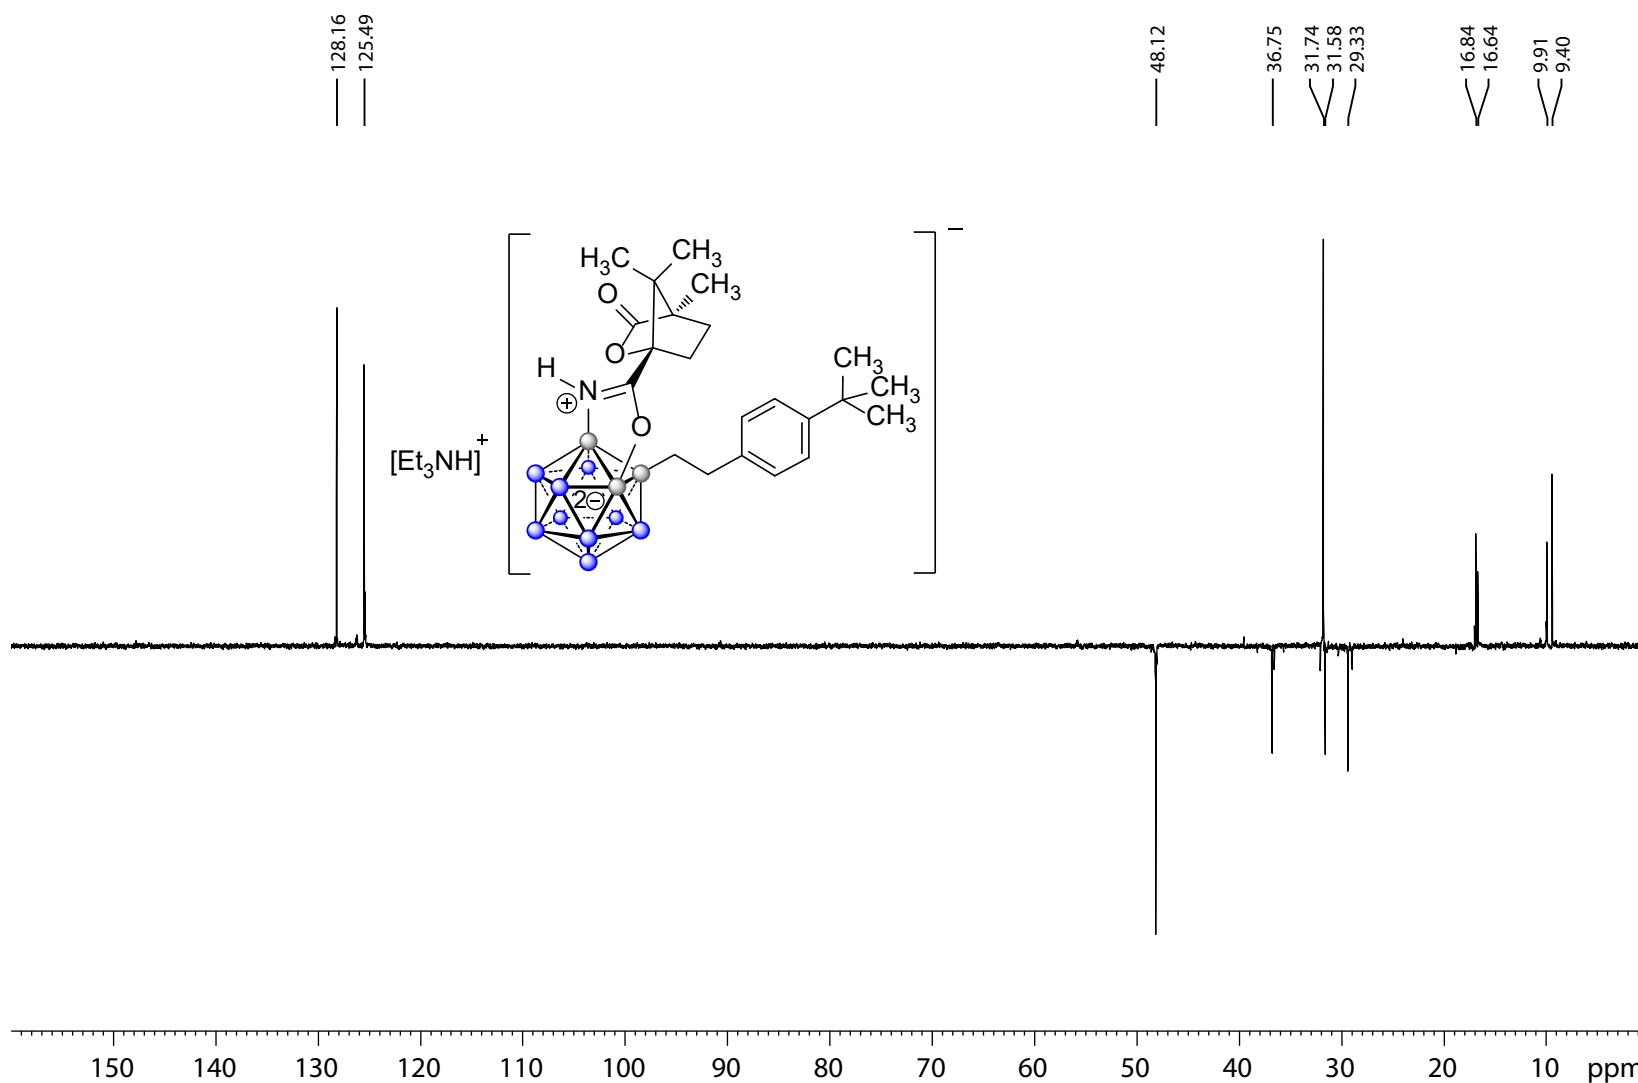

Current Data Parameters  
 NAME 20191001-RV-B12C-4tBuStyr  
 EXPNO 6  
 PROCNO 1

F2 - Acquisition Parameters  
 Date\_ 20191002  
 Time\_ 3.30  
 INSTRUM spect  
 PROBHD 5 mm PABBO BB/  
 PULPROG dept135  
 TD 65536  
 SOLVENT Acetone  
 NS 512  
 DS 4  
 SWH 29296.875 Hz  
 FIDRES 0.447035 Hz  
 AQ 1.1184810 sec  
 RG 193.34  
 DW 17.067 usec  
 DE 6.50 usec  
 TE 296.5 K  
 CNST2 145.0000000  
 D1 2.00000000 sec  
 D2 0.00344828 sec  
 D12 0.00002000 sec  
 TD0 1

===== CHANNEL f1 =====  
 NUC1 13C  
 P1 10.00 usec  
 P2 20.00 usec  
 PLW1 53.00000000 W  
 SFO1 100.6228293 MHz

===== CHANNEL f2 =====  
 CPDPRG[2] waltz16  
 NUC2 1H  
 P3 15.00 usec  
 P4 30.00 usec  
 PCPD2 80.00 usec  
 PLW2 12.50000000 W  
 PLW12 0.43945000 W  
 SFO2 400.1316005 MHz

F2 - Processing parameters  
 SI 32768  
 SF 100.6126863 MHz  
 WDW EM  
 SSB 0  
 LB 1.00 Hz  
 GB 0  
 PC 4.00

$^1\text{H} - ^1\text{H}$  COSY NMR

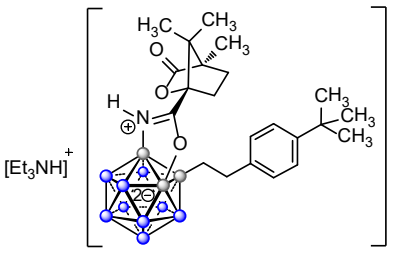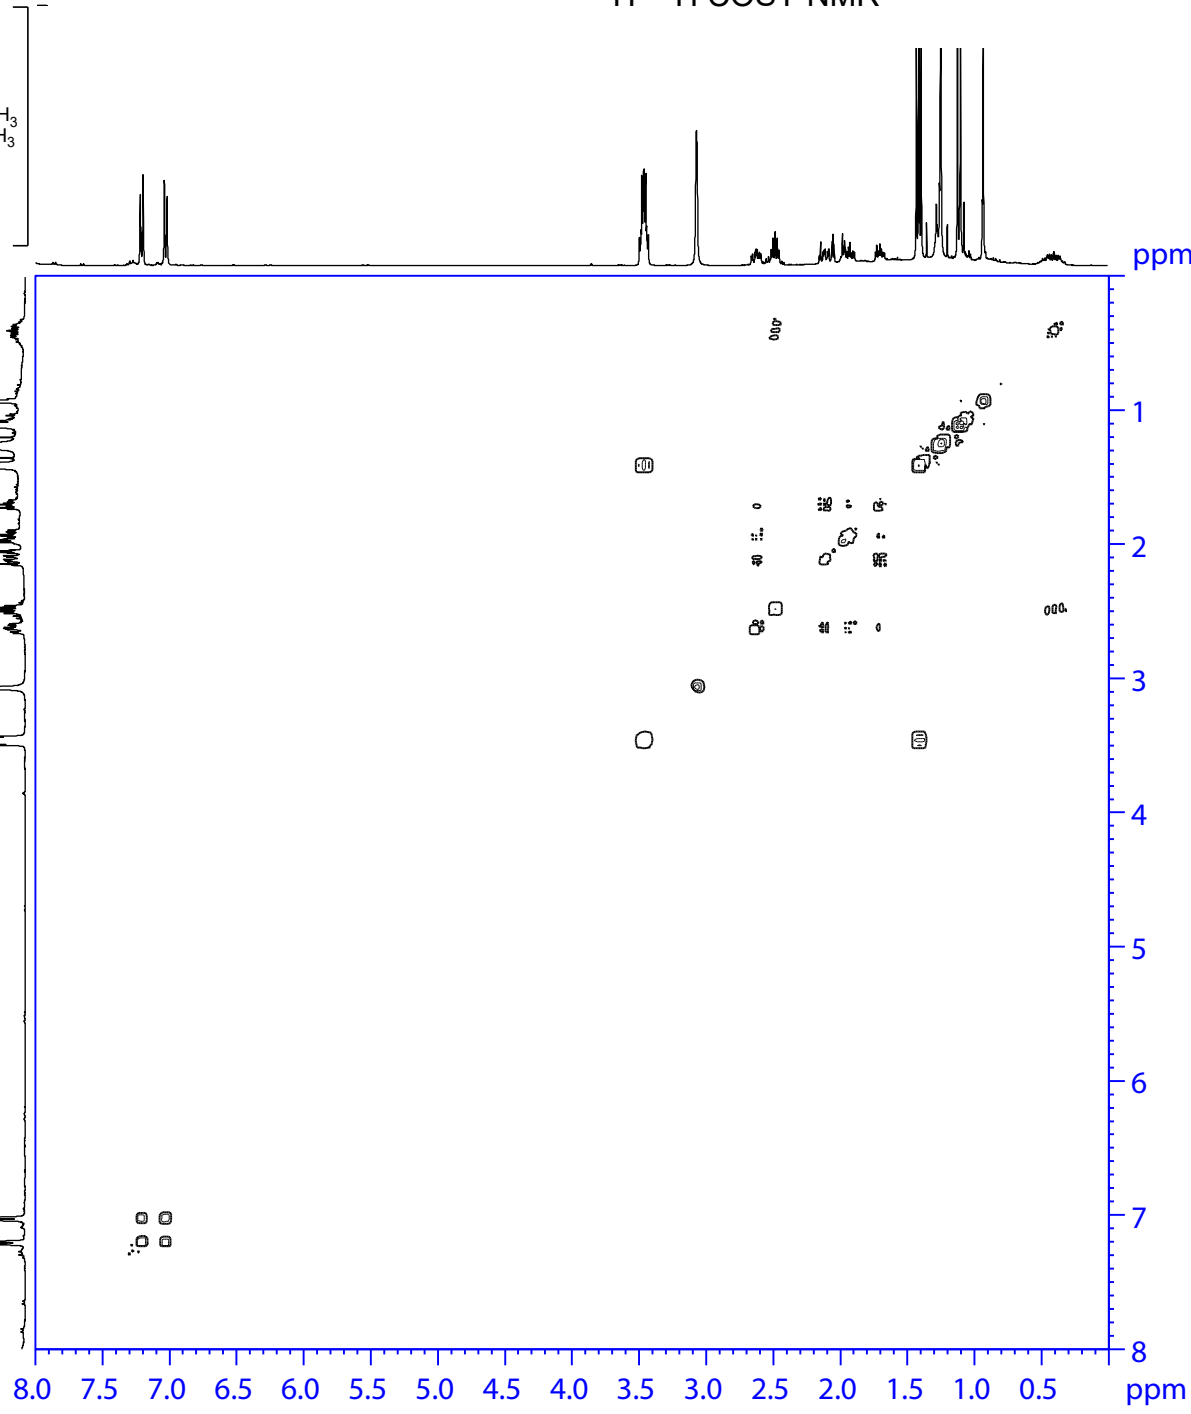

Current Data Parameters  
 NAME 20191001-RV-B12C-4tBuStyr  
 EXPNO 7  
 PROCNO 1

F2 - Acquisition Parameters  
 Date\_ 20191002  
 Time\_ 3.31  
 INSTRUM spect  
 PROBHD 5 mm PABBO BB/  
 PULPROG cosygpppqf  
 TD 2048  
 SOLVENT Acetone  
 NS 2  
 DS 8  
 SWH 5341.880 Hz  
 FIDRES 2.608340 Hz  
 AQ 0.1916928 sec  
 RG 64.43  
 DW 93.600 usec  
 DE 6.50 usec  
 TE 296.2 K  
 D0 0.0000300 sec  
 D1 2.0000000 sec  
 D11 0.0300000 sec  
 D12 0.0000200 sec  
 D13 0.0000040 sec  
 D16 0.0002000 sec  
 INO 0.00018720 sec

===== CHANNEL f1 =====  
 NUC1 1H  
 P0 15.00 usec  
 P1 15.00 usec  
 P17 2500.00 usec  
 PLW1 12.5000000 W  
 PLW10 4.16050005 W  
 SFO1 400.1324057 MHz

===== GRADIENT CHANNEL =====  
 GPNAM[1] SMSQ10.100  
 GPZ1 10.00 %  
 P16 1000.00 usec

F1 - Acquisition parameters  
 TD 128  
 SFO1 400.1324 MHz  
 FIDRES 83.466881 Hz  
 SW 13.350 ppm  
 FhMODE QF

F2 - Processing parameters  
 SI 1024  
 SF 400.1300088 MHz  
 WDW QSINE  
 SSB 0  
 LB 0 Hz  
 GB 0  
 PC 1.40

F1 - Processing parameters  
 SI 1024  
 MC2 QF  
 SF 400.1300084 MHz  
 WDW QSINE  
 SSB 0  
 LB 0 Hz  
 GB 0



20191001-B12C-4tBuStyr 20 mg white solid [Et<sub>3</sub>NH][B<sub>12</sub>H<sub>10</sub>NHCO(Camphanic)CH<sub>2</sub>CH<sub>2</sub>C<sub>6</sub>H<sub>4</sub>-tBu] dissolved in 0.6 mL acetone-d<sub>6</sub>\*

<sup>1</sup>H - <sup>13</sup>C HSQC NMR

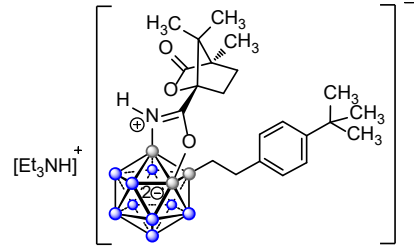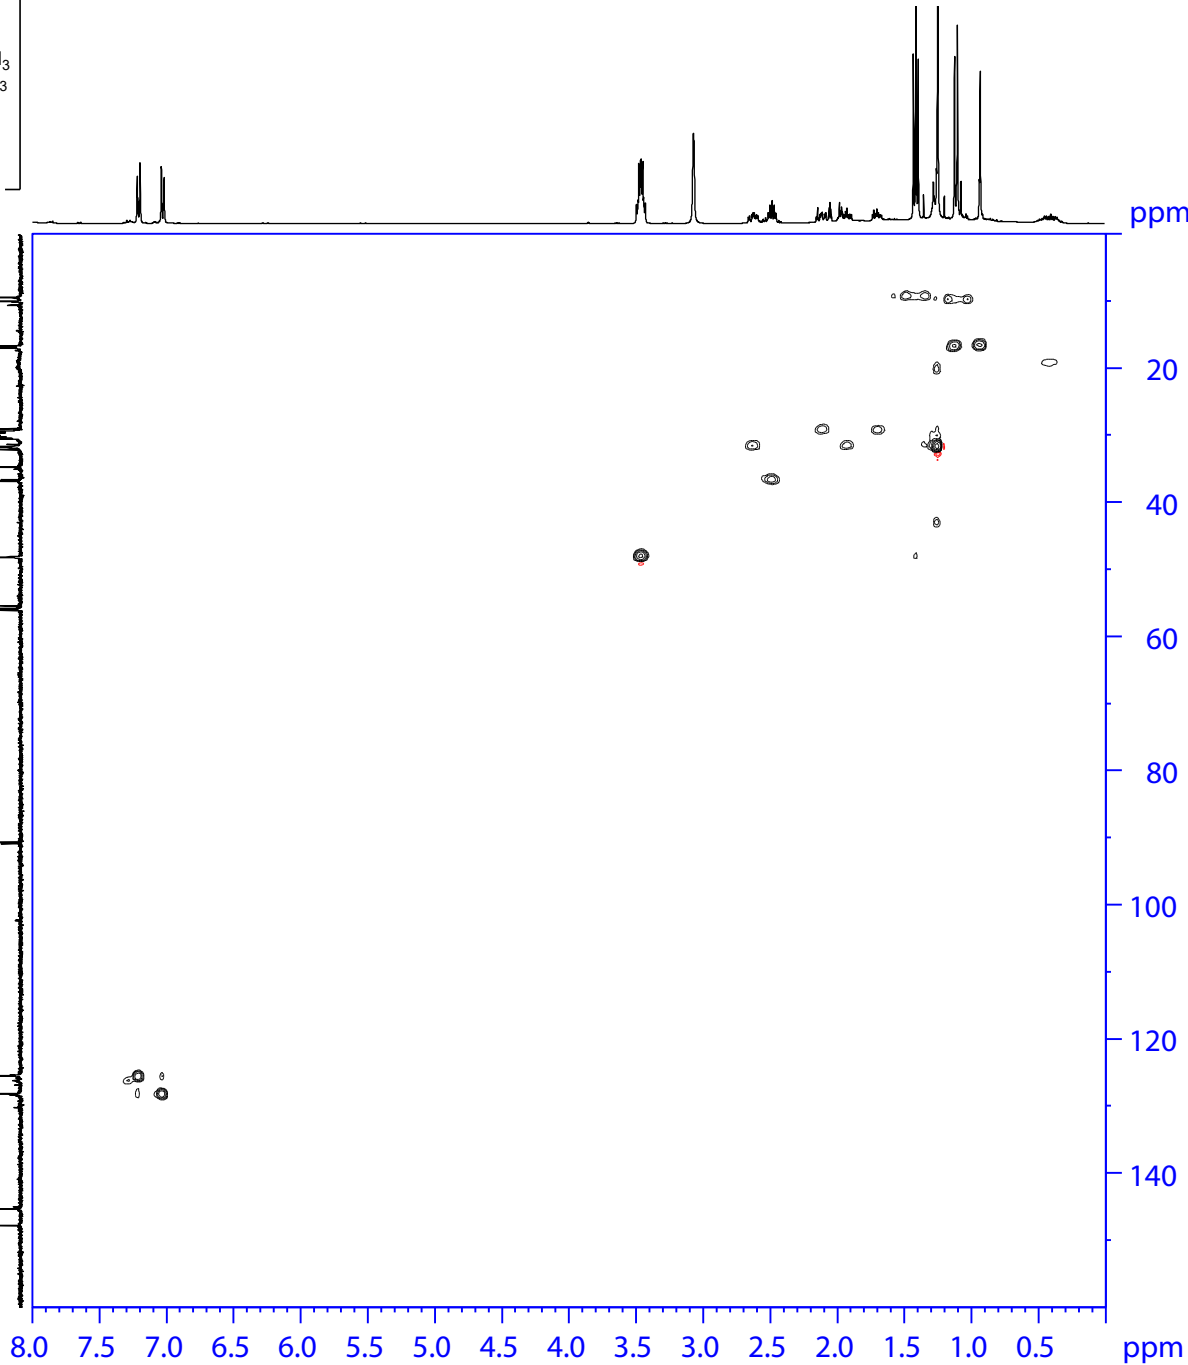

Current Data Parameters  
NAME 20191001-RV-B12C-4tBuStyr  
EXPNO 8  
PROCNO 1

F2 - Acquisition Parameters  
Date\_ 20191002  
Time 3.42  
INSTRUM spect  
PROBHD 5 mm PABBO BB/  
PULPROG hsqcetgps12  
TD 1024  
SOLVENT Acetone  
NS 2  
DS 16  
SWH 6009.615 Hz  
FIDRES 5.868765 Hz  
AQ 0.0851968 sec  
RG 193.34  
DW 83.200 usec  
DE 6.50 usec  
TE 296.1 K  
CNST2 145.0000000  
D0 0.00000300 sec  
D1 1.50000000 sec  
D4 0.00172414 sec  
D11 0.03000000 sec  
D16 0.00020000 sec  
D24 0.00086207 sec  
INO 0.00001990 sec  
ZGOPTNS

===== CHANNEL f1 =====  
NUC1 1H  
P1 15.00 usec  
P2 30.00 usec  
P28 1000.00 usec  
PLW1 12.50000000 W  
SFO1 400.1328009 MHz

===== CHANNEL f2 =====  
CPDPRG2 gaxp  
NUC2 13C  
P3 10.00 usec  
P4 20.00 usec  
PCPD2 70.00 usec  
PLW2 53.00000000 W  
PLW12 1.08159995 W  
SFO2 100.6238364 MHz

===== GRADIENT CHANNEL =====  
GPNAM[1] SMSQ10.100  
GPNAM[2] SMSQ10.100  
GPNAM[3] SMSQ10.100  
GPNAM[4] SMSQ10.100  
GPZ1 80.00 %  
GPZ2 20.10 %  
GPZ3 11.00 %  
GPZ4 -5.00 %  
P16 1000.00 usec  
P19 600.00 usec

F1 - Acquisition parameters  
TD 256  
SFO1 100.6238 MHz  
FIDRES 196.524048 Hz  
SW 249.991 ppm  
FhMODE Echo-Antiecho

F2 - Processing parameters  
SI 1024  
SF 400.1300071 MHz  
WDW QSINE  
SSB 2  
LB 0 Hz  
GB 0  
PC 1.40

F1 - Processing parameters  
SI 1024  
MC2 echo-antiecho  
SF 100.6126796 MHz  
WDW QSINE  
SSB 2  
LB 0 Hz  
GB 0

20190926-B12C-4OCOMeSTYR 20 mg white solid [Et<sub>3</sub>NH][B<sub>12</sub>H<sub>10</sub>NHCO(Camphanic)CH<sub>2</sub>CH<sub>2</sub>C<sub>6</sub>H<sub>4</sub>-4OCOMe] dissolved in 0.6 mL acetone-*d*<sub>6</sub>\*

400MHz <sup>1</sup>H NMR, ◊ deuterated solvent residual peak= 2.05 ppm; ◇ water peak

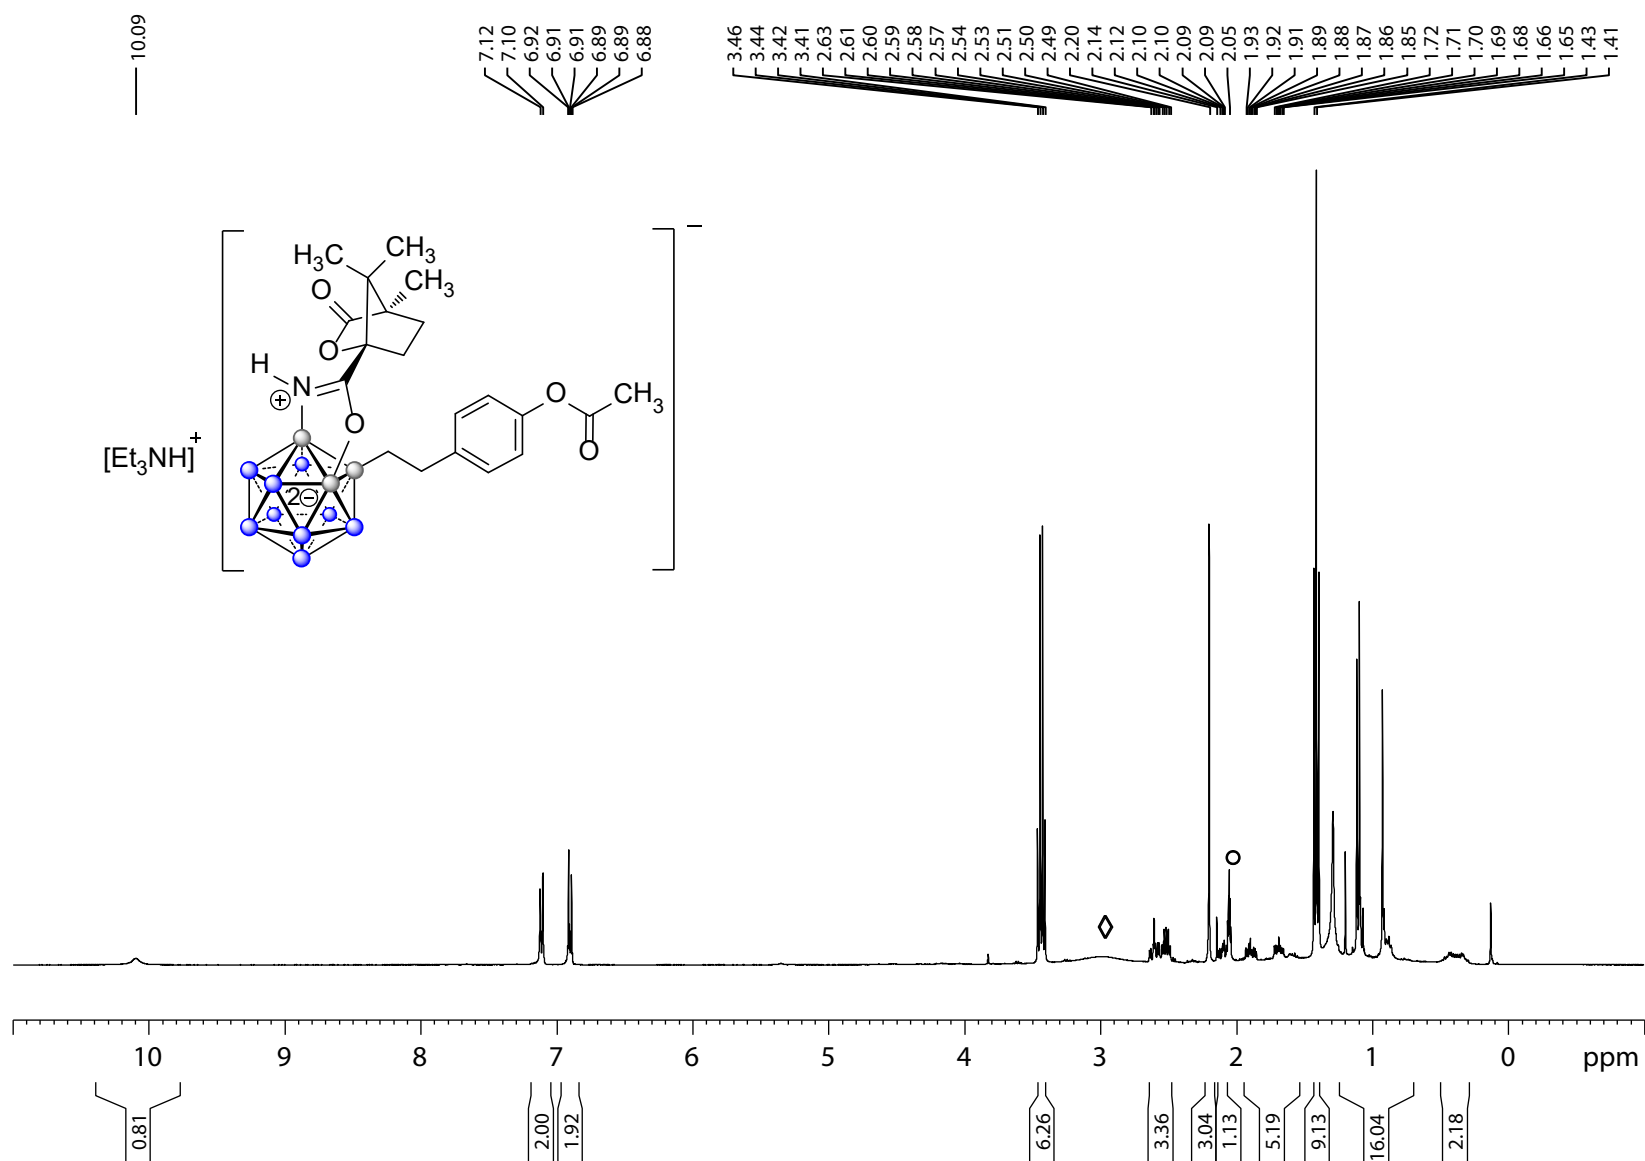

Current Data Parameters  
 NAME 20190926-B12C-4OCOMeStyr  
 EXPNO 1  
 PROCNO 1

F2 - Acquisition Parameters  
 Date\_ 20190927  
 Time\_ 12.24  
 INSTRUM spect  
 PROBHD 5 mm PABBO BB/  
 PULPROG zg30  
 TD 65536  
 SOLVENT Acetone  
 NS 16  
 DS 2  
 SWH 10000.000 Hz  
 FIDRES 0.152588 Hz  
 AQ 3.2767999 sec  
 RG 95.29  
 DW 50.000 usec  
 DE 6.50 usec  
 TE 296.0 K  
 D1 1.00000000 sec  
 TD0 1

==== CHANNEL f1 =====  
 NUC1 1H  
 P1 15.00 usec  
 PLW1 12.50000000 W  
 SFO1 400.1328009 MHz

F2 - Processing parameters  
 SI 65536  
 SF 400.1300069 MHz  
 WDW EM  
 SSB 0  
 LB 0.30 Hz  
 GB 0  
 PC 1.00

20190926-B12C-4OCOMeSTYR 20 mg white solid [Et<sub>3</sub>NH][B<sub>12</sub>H<sub>10</sub>NHCO(Camphanic)CH<sub>2</sub>CH<sub>2</sub>C<sub>6</sub>H<sub>4</sub>-4OCOMe] dissolved in 0.6 mL acetone-d<sub>6</sub>\*

400MHz <sup>1</sup>H{<sup>11</sup>B} NMR, ◊ deuterated solvent residual peak= 2.05 ppm; ◇ water peak

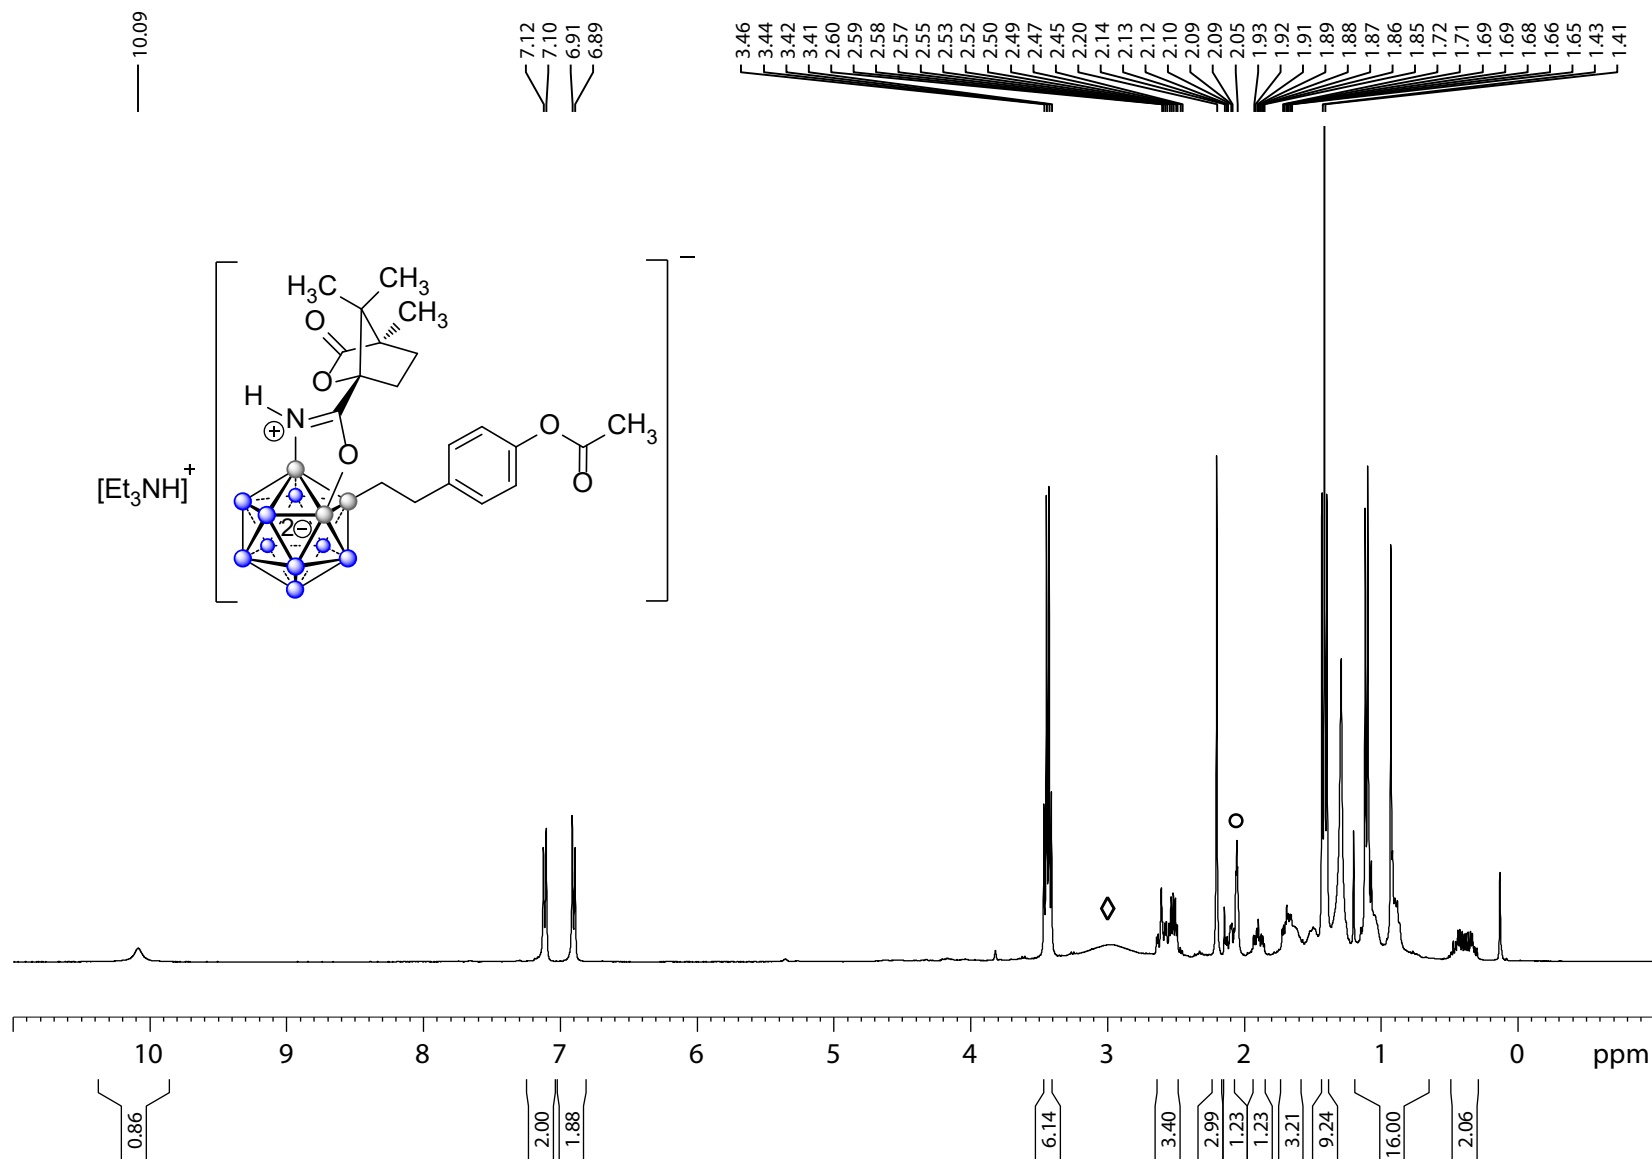

Current Data Parameters  
 NAME 20190926-B12C-4OCOMeStyr  
 EXPNO 2  
 PROCNO 1

F2 - Acquisition Parameters  
 Date\_ 20190927  
 Time\_ 12.26  
 INSTRUM spect  
 PROBHD 5 mm PABBO BB/  
 PULPROG zgig30  
 TD 16384  
 SOLVENT Acetone  
 NS 16  
 DS 4  
 SWH 8012.820 Hz  
 FIDRES 0.489064 Hz  
 AQ 1.0223616 sec  
 RG 107.6  
 DW 62.400 usec  
 DE 6.50 usec  
 TE 296.3 K  
 D1 1.00000000 sec  
 D11 0.03000000 sec  
 TD0 1

==== CHANNEL f1 =====  
 NUC1 1H  
 P1 15.00 usec  
 PLW1 12.50000000 W  
 SFO1 400.1320007 MHz

==== CHANNEL f2 =====  
 CPDPRG[2] garp4  
 NUC2 11B  
 PCPD2 90.00 usec  
 PLW2 52.96599960 W  
 PLW12 0.64477998 W  
 SFO2 128.3776050 MHz

F2 - Processing parameters  
 SI 32768  
 SF 400.1300069 MHz  
 WDW EM  
 SSB 0  
 LB 1.00 Hz  
 GB 0  
 PC 1.40

20190926-B12C-4OCOMeSTYR 20 mg white solid  $[\text{Et}_3\text{NH}][\text{B}_{12}\text{H}_{10}\text{NHCO}(\text{Camphanic})\text{CH}_2\text{CH}_2\text{C}_6\text{H}_4\text{-4OCOMe}]$  dissolved in 0.6 mL acetone- $d_6^*$

$^{11}\text{B}$  NMR 128MHz

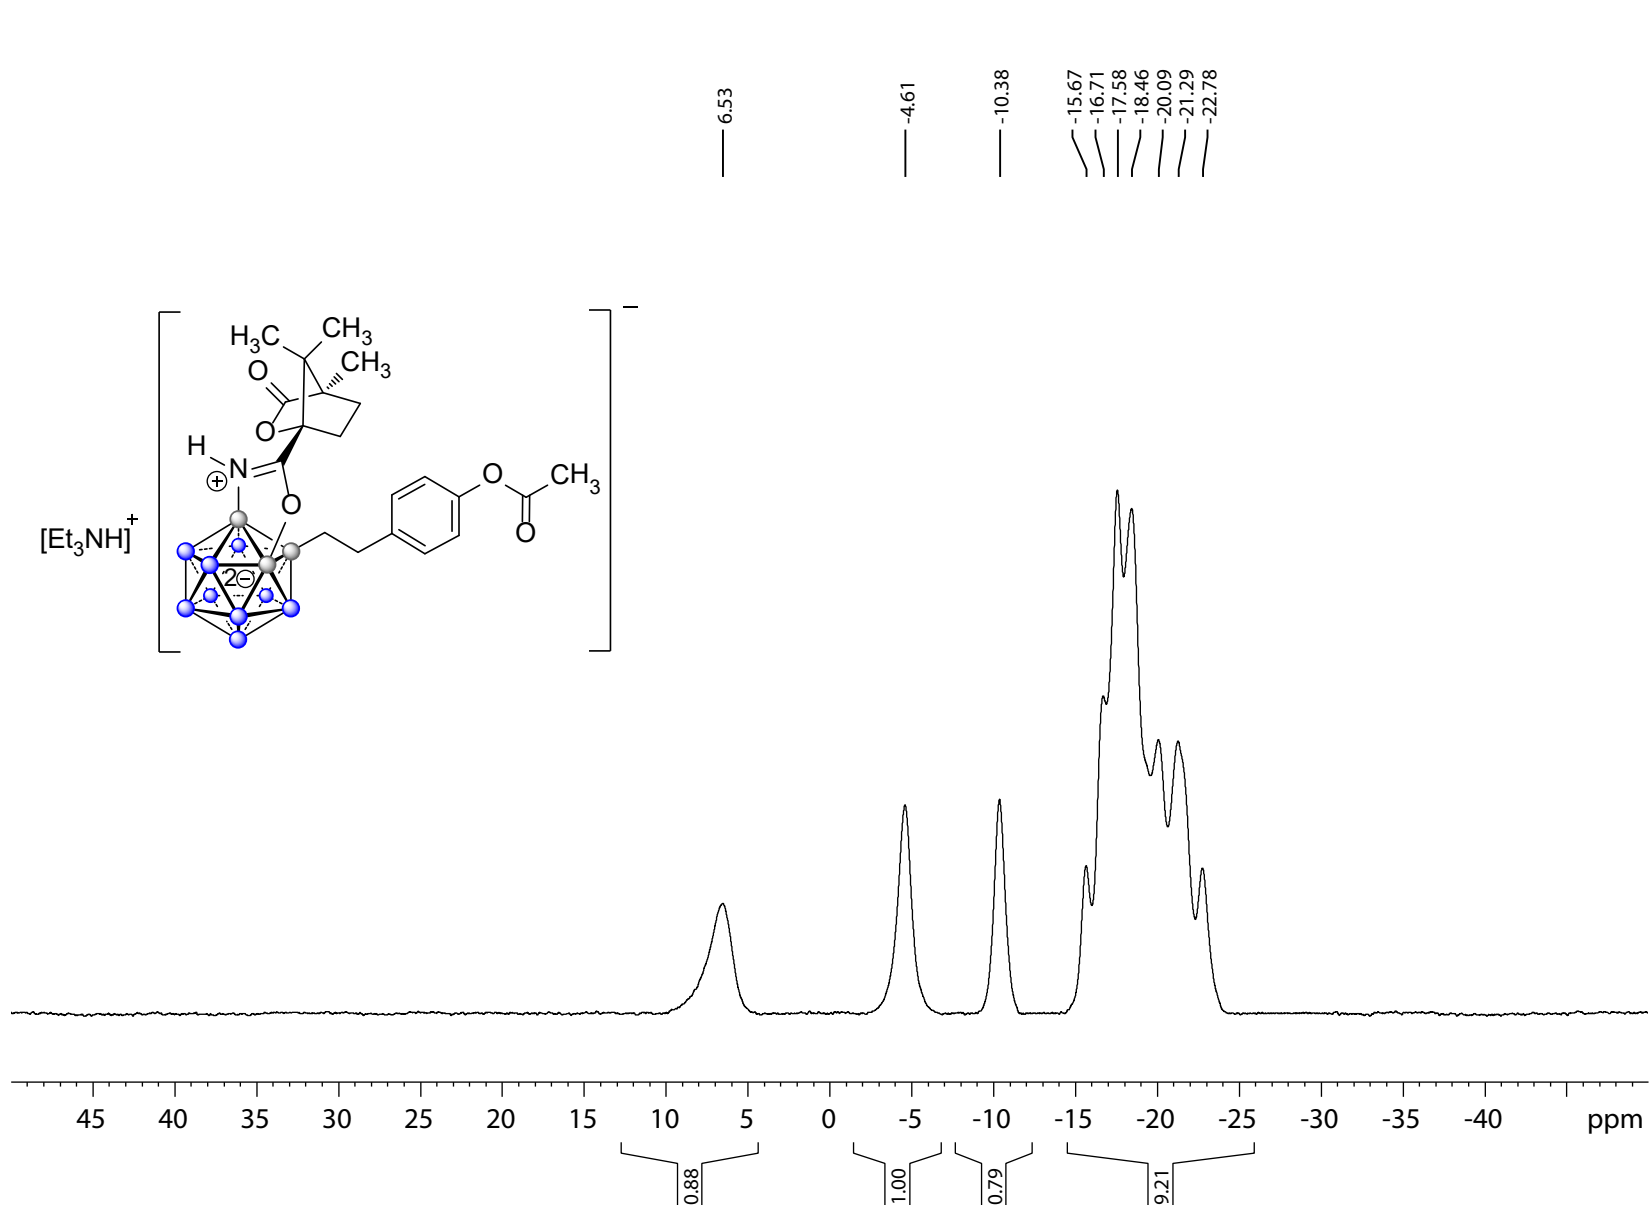

Current Data Parameters  
NAME 20190926-B12C-4OCOMeStyr  
EXPNO 3  
PROCNO 1

F2 - Acquisition Parameters  
Date\_ 20190927  
Time\_ 12.32  
INSTRUM spect  
PROBHD 5 mm PABBO BB/  
PULPROG zg  
TD 65536  
SOLVENT Acetone  
NS 128  
DS 4  
SWH 25510.203 Hz  
FIDRES 0.389255 Hz  
AQ 1.2845056 sec  
RG 193.34  
DW 19.600 usec  
DE 6.50 usec  
TE 295.4 K  
D1 1.00000000 sec  
TD0 1

===== CHANNEL f1 =====  
NUC1 11B  
P1 9.93 usec  
PLW1 52.96599960 W  
SFO1 128.3776052 MHz

F2 - Processing parameters  
SI 32768  
SF 128.3776050 MHz  
WDW EM  
SSB 0  
LB 10.00 Hz  
GB 0  
PC 1.40

20190926-B12C-4OCOMeSTYR 20 mg white solid  $[\text{Et}_3\text{NH}][\text{B}_{12}\text{H}_{10}\text{NHCO}(\text{Camphanic})\text{CH}_2\text{CH}_2\text{C}_6\text{H}_4\text{-4OCOMe}]$  dissolved in 0.6 mL acetone- $d_6^*$

$^{11}\text{B}\{^1\text{H}\}$  NMR 128MHz

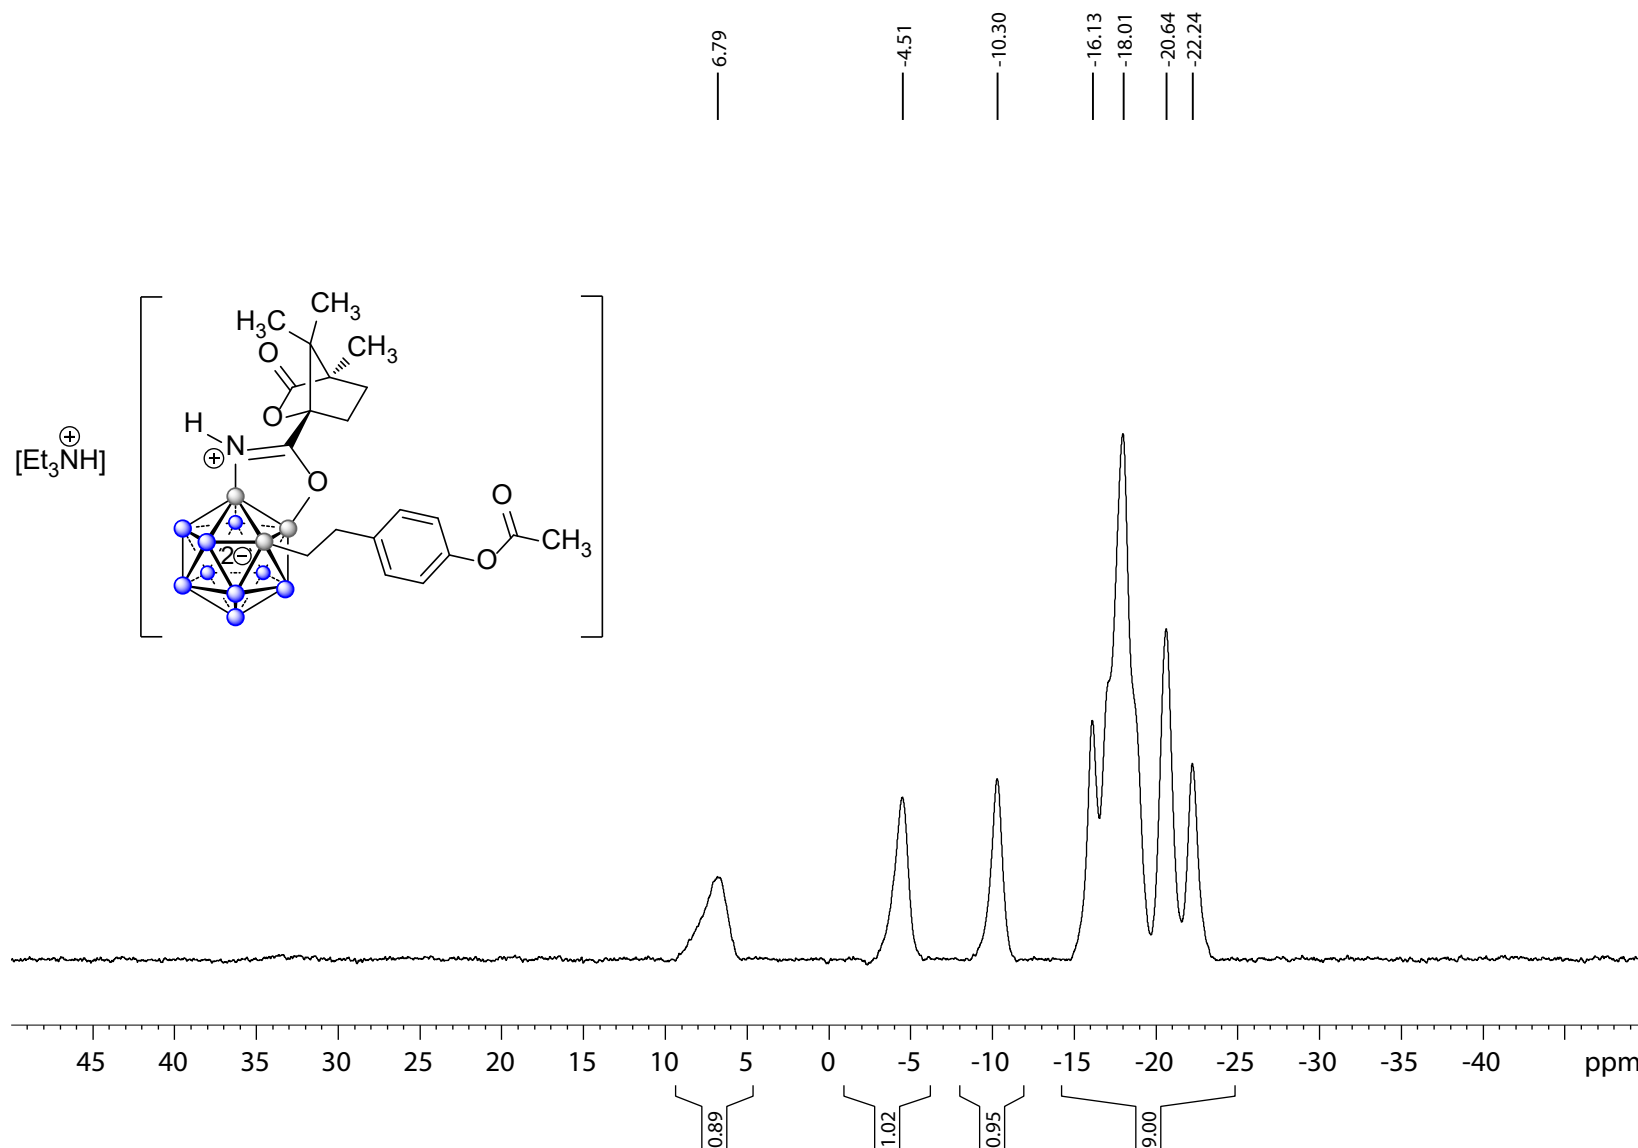

Current Data Parameters  
NAME 20190926-B12C-4OCOMeStyr  
EXPNO 4  
PROCNO 1

F2 - Acquisition Parameters  
Date\_ 20190927  
Time\_ 12.38  
INSTRUM spect  
PROBHD 5 mm PABBO BB/  
PULPROG zgpg30  
TD 65536  
SOLVENT Acetone  
NS 128  
DS 4  
SWH 25510.203 Hz  
FIDRES 0.389255 Hz  
AQ 1.2845056 sec  
RG 193.34  
DW 19.600 usec  
DE 6.50 usec  
TE 296.5 K  
D1 1.00000000 sec  
D11 0.03000000 sec  
TD0 1

===== CHANNEL f1 =====  
NUC1 11B  
P1 9.93 usec  
PLW1 52.96599960 W  
SFO1 128.3776050 MHz

===== CHANNEL f2 =====  
CPDPRG[2] waltz16  
NUC2 1H  
PCPD2 80.00 usec  
PLW2 12.50000000 W  
PLW12 0.43945000 W  
PLW13 0.28125000 W  
SFO2 400.1320007 MHz

F2 - Processing parameters  
SI 32768  
SF 128.3776050 MHz  
WDW EM  
SSB 0  
LB 10.00 Hz  
GB 0  
PC 1.40

NMR-067

20190926-B12C-4OCOMeSTYR 20 mg white solid  $[\text{Et}_3\text{NH}][\text{B}_{12}\text{H}_{10}\text{NHCO}(\text{Camphanic})\text{CH}_2\text{CH}_2\text{C}_6\text{H}_4\text{-4OCOMe}]$  dissolved in 0.6 mL acetone- $d_6^*$

$^{13}\text{C}\{^1\text{H}\}$  NMR 100 MHz

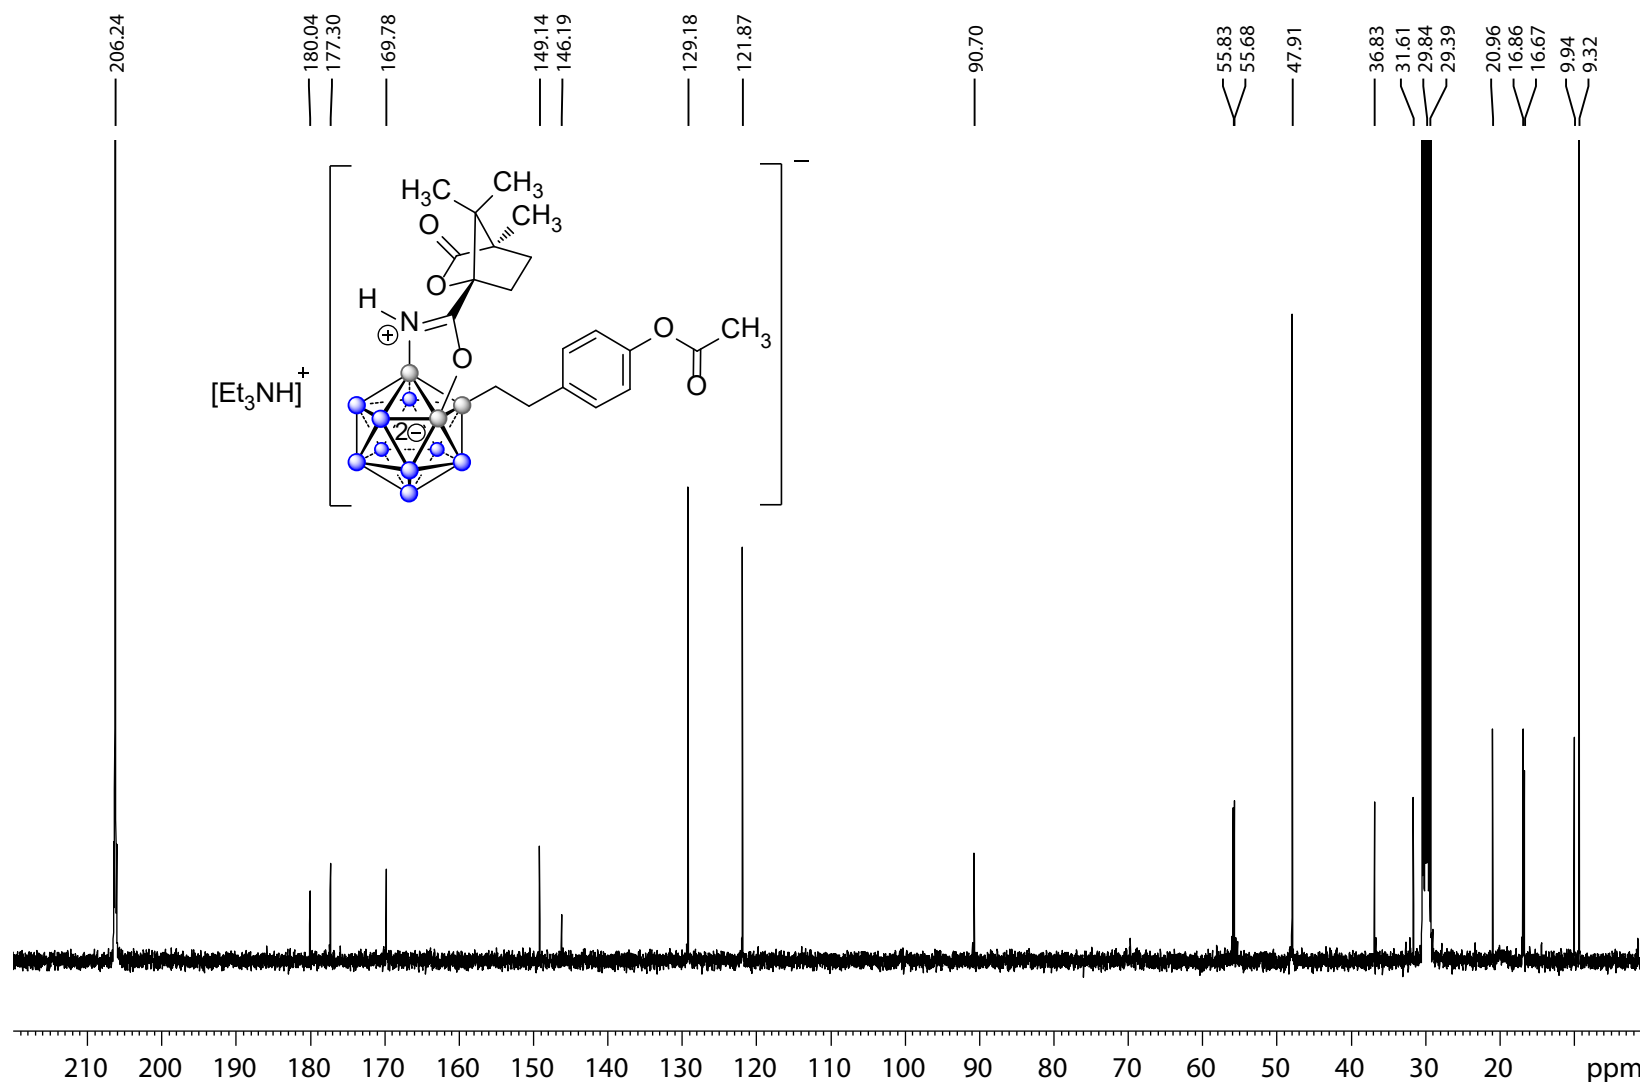

Current Data Parameters  
NAME 20190926-B12C-4OCOMeStyr  
EXPNO 5  
PROCNO 1

F2 - Acquisition Parameters  
Date\_ 20190927  
Time\_ 14.10  
INSTRUM spect  
PROBHD 5 mm PABBO BB/  
PULPROG zgpg30  
TD 65536  
SOLVENT Acetone  
NS 2048  
DS 4  
SWH 29761.904 Hz  
FIDRES 0.454131 Hz  
AQ 1.1010048 sec  
RG 193.34  
DW 16.800 usec  
DE 6.50 usec  
TE 296.4 K  
D1 1.50000000 sec  
D11 0.03000000 sec  
TD0 1

==== CHANNEL f1 =====  
NUC1 13C  
P1 10.00 usec  
PLW1 53.00000000 W  
SFO1 100.6228293 MHz

==== CHANNEL f2 =====  
CPDPRG[2] waltz16  
NUC2 1H  
PCPD2 80.00 usec  
PLW2 12.50000000 W  
PLW12 0.43945000 W  
PLW13 0.28125000 W  
SFO2 400.1316005 MHz

F2 - Processing parameters  
SI 32768  
SF 100.6126811 MHz  
WDW EM  
SSB 0  
LB 1.00 Hz  
GB 0  
PC 1.40

20190926-B12C-4OCOMeSTYR 20 mg white solid  $[\text{Et}_3\text{NH}][\text{B}_{12}\text{H}_{10}\text{NHCO}(\text{Camphanic})\text{CH}_2\text{CH}_2\text{C}_6\text{H}_4\text{-4OCOMe}]$  dissolved in 0.6 mL acetone- $d_6^*$

$^{13}\text{C}$  DEPT NMR 100 MHz

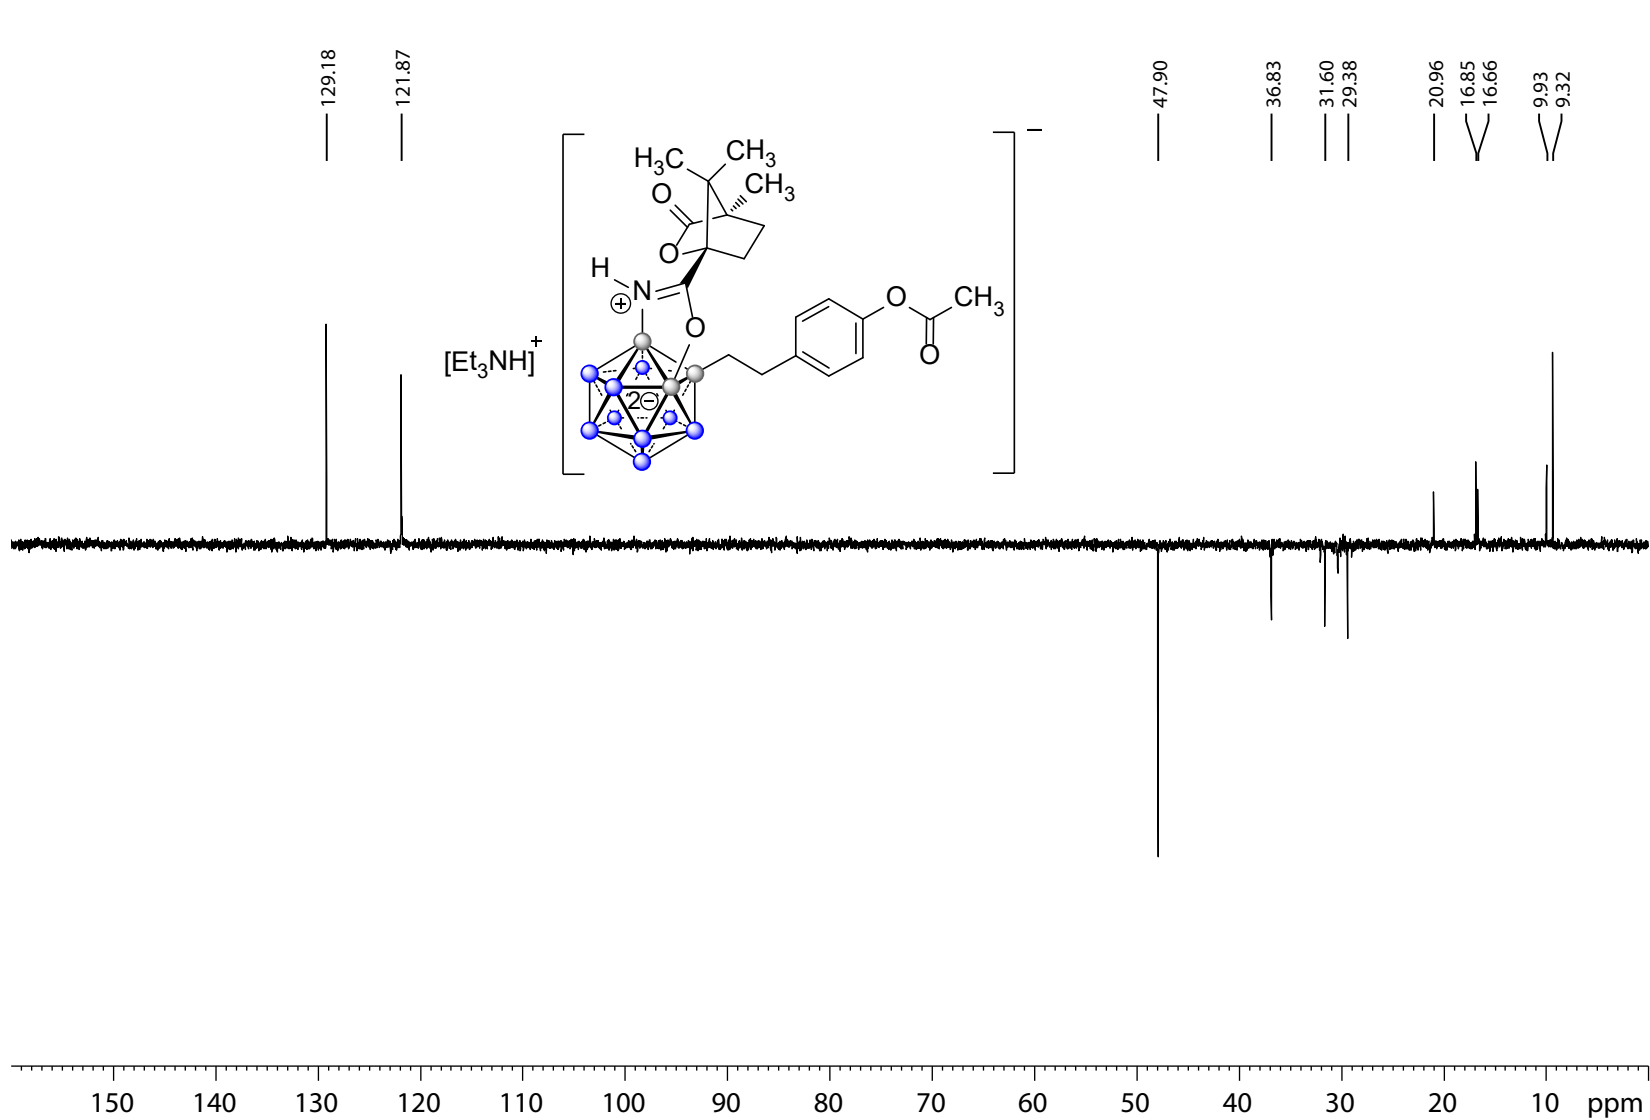

Current Data Parameters  
 NAME 20190926-B12C-4OCOMeStyr  
 EXPNO 6  
 PROCNO 1

F2 - Acquisition Parameters  
 Date\_ 20190927  
 Time\_ 14.38  
 INSTRUM spect  
 PROBHD 5 mm PABBO BB/  
 PULPROG dept135  
 TD 65536  
 SOLVENT Acetone  
 NS 512  
 DS 4  
 SWH 29296.875 Hz  
 FIDRES 0.447035 Hz  
 AQ 1.1184810 sec  
 RG 193.34  
 DW 17.067 usec  
 DE 6.50 usec  
 TE 296.2 K  
 CNST2 145.0000000  
 D1 2.00000000 sec  
 D2 0.00344828 sec  
 D12 0.00002000 sec  
 TD0 1

===== CHANNEL f1 =====  
 NUC1 13C  
 P1 10.00 usec  
 P2 20.00 usec  
 PLW1 53.00000000 W  
 SFO1 100.6228293 MHz

===== CHANNEL f2 =====  
 CPDPRG[2] waltz16  
 NUC2 1H  
 P3 15.00 usec  
 P4 30.00 usec  
 PCPD2 80.00 usec  
 PLW2 12.50000000 W  
 PLW12 0.43945000 W  
 SFO2 400.1316005 MHz

F2 - Processing parameters  
 SI 32768  
 SF 100.6126815 MHz  
 WDW EM  
 SSB 0  
 LB 1.00 Hz  
 GB 0  
 PC 4.00

<sup>1</sup>H - <sup>1</sup>H COSY NMR

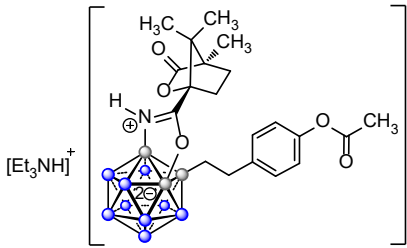

Current Data Parameters  
 NAME 20190926-B12C-4OCOMeStyr  
 EXPNO 7  
 PROCNO 1

F2 - Acquisition Parameters  
 Date\_ 20190927  
 Time\_ 14.39  
 INSTRUM spect  
 PROBHD 5 mm PABBO BB/  
 PULPROG cosygpppqf  
 TD 2048  
 SOLVENT Acetone  
 NS 2  
 DS 8  
 SWH 5341.880 Hz  
 FIDRES 2.608340 Hz  
 AQ 0.1916928 sec  
 RG 193.34  
 DW 93.600 usec  
 DE 6.50 usec  
 TE 296.1 K  
 D0 0.0000300 sec  
 D1 2.0000000 sec  
 D11 0.03000000 sec  
 D12 0.00002000 sec  
 D13 0.00000400 sec  
 D16 0.00020000 sec  
 IN0 0.00018720 sec

===== CHANNEL f1 =====  
 NUC1 1H  
 P0 15.00 usec  
 P1 15.00 usec  
 P17 2500.00 usec  
 PLW1 12.5000000 W  
 PLW10 4.16050005 W  
 SFO1 400.1324057 MHz

===== GRADIENT CHANNEL =====  
 GPNAM[1] SMSQ10.100  
 GPZ1 10.00 %  
 P16 1000.00 usec

F1 - Acquisition parameters  
 TD 128  
 SFO1 400.1324 MHz  
 FIDRES 83.466881 Hz  
 SW 13.350 ppm  
 FnMODE QF

F2 - Processing parameters  
 SI 1024  
 SF 400.1300072 MHz  
 WDW QSINE  
 SSB 0  
 LB 0 Hz  
 GB 0  
 PC 1.40

F1 - Processing parameters  
 SI 1024  
 MC2 QF  
 SF 400.1300073 MHz  
 WDW QSINE  
 SSB 0  
 LB 0 Hz  
 GB 0

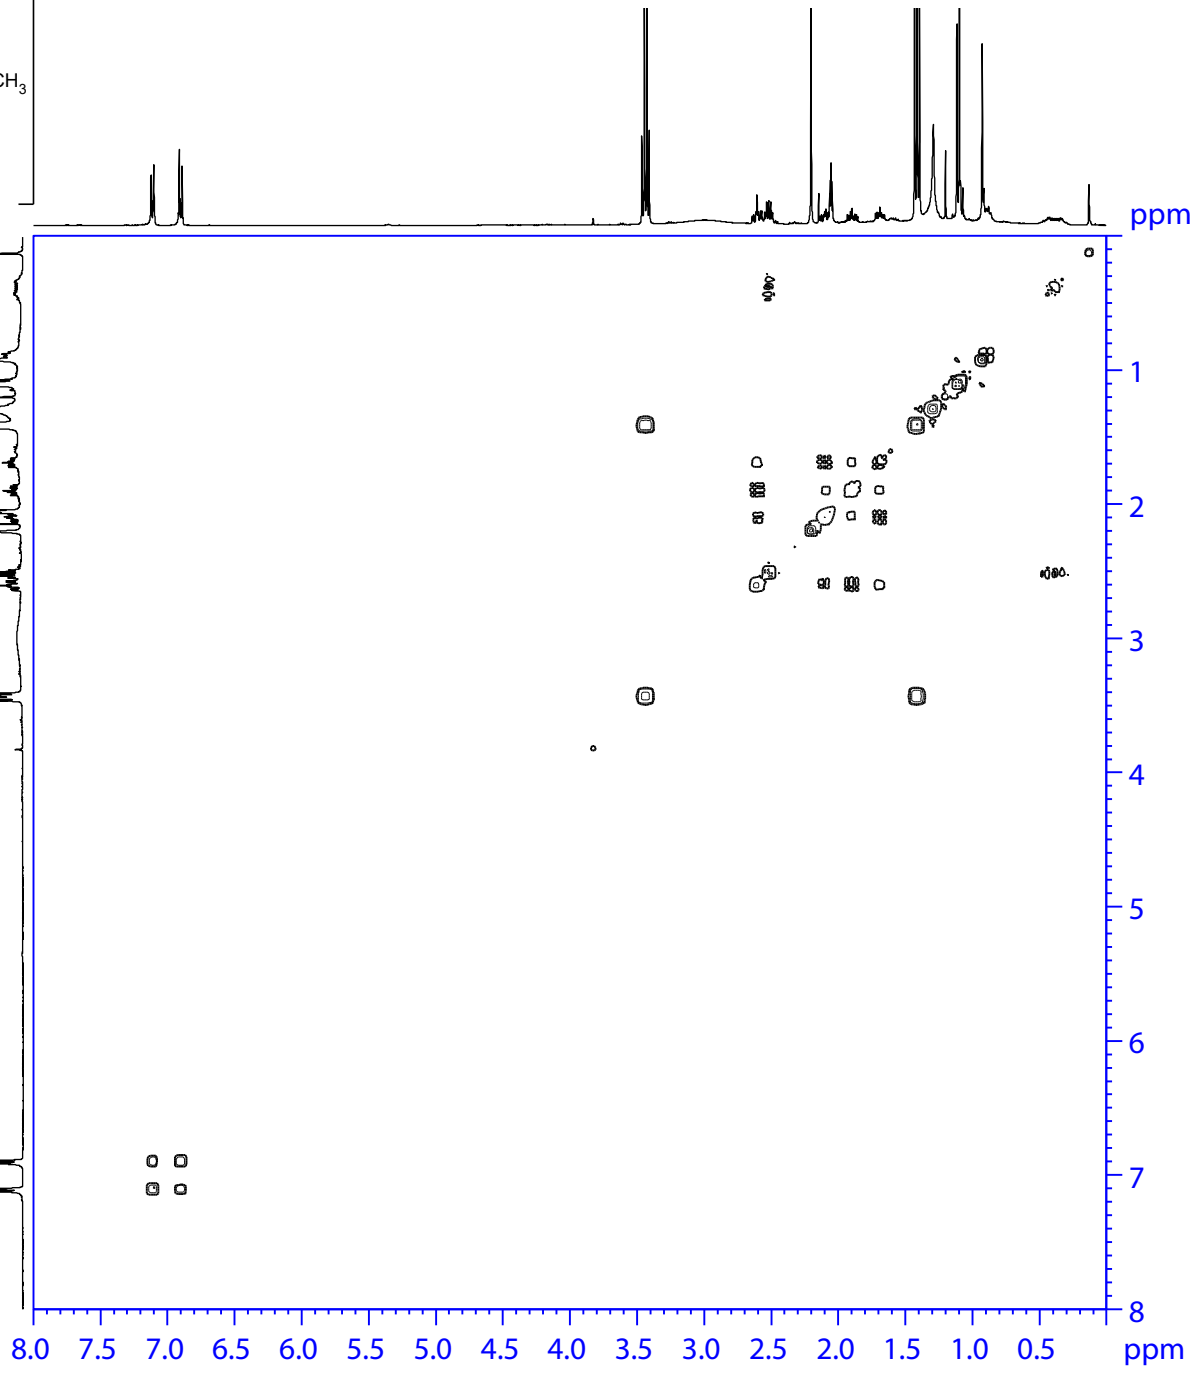



<sup>1</sup>H - <sup>13</sup>C HSQC NMR

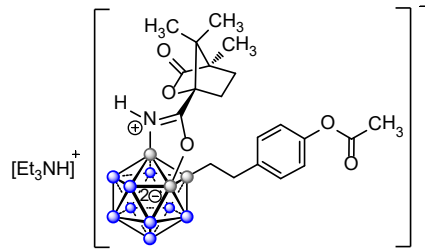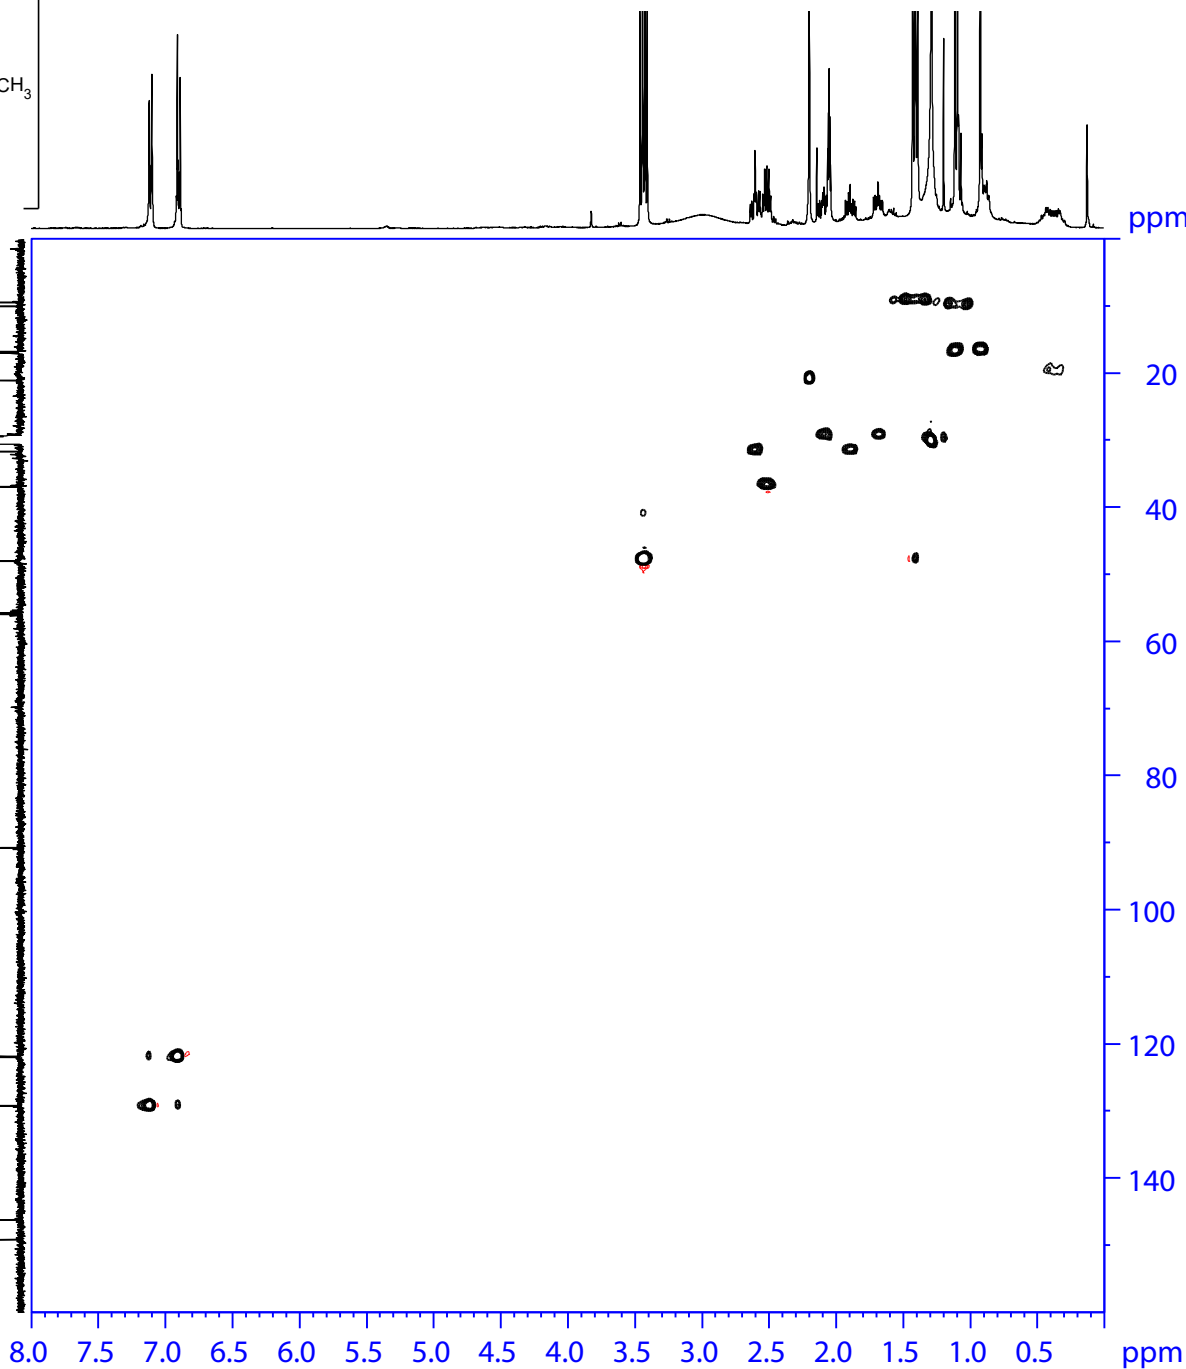

Current Data Parameters  
 NAME 20190926-B12C-4OCOMeStyr  
 EXPNO 8  
 PROCNO 1

F2 - Acquisition Parameters  
 Date\_ 20190927  
 Time\_ 14.50  
 INSTRUM spect  
 PROBHD 5 mm PABBO BB/  
 PULPROG hsqcetgps12  
 TD 1024  
 SOLVENT Acetone  
 NS 2  
 DS 16  
 SWH 6009.615 Hz  
 FIDRES 5.868765 Hz  
 AQ 0.0851968 sec  
 RG 193.34  
 DW 83.200 usec  
 DE 6.50 usec  
 TE 295.9 K  
 CNST2 145.0000000  
 D0 0.0000300 sec  
 D1 1.50000000 sec  
 D4 0.00172414 sec  
 D11 0.03000000 sec  
 D16 0.00020000 sec  
 D24 0.00086207 sec  
 IN0 0.00001990 sec  
 ZGPGTNS

===== CHANNEL f1 =====  
 NUC1 1H  
 P1 15.00 usec  
 P2 30.00 usec  
 P28 1000.00 usec  
 PLW1 12.50000000 W  
 SFO1 400.1328009 MHz

===== CHANNEL f2 =====  
 CPDPRG[2] garp  
 NUC2 13C  
 P3 10.00 usec  
 P4 20.00 usec  
 PCPD2 70.00 usec  
 PLW2 53.00000000 W  
 PLW12 1.08159995 W  
 SFO2 100.6238364 MHz

===== GRADIENT CHANNEL =====  
 GPNAM[1] SMSQ10.100  
 GPNAM[2] SMSQ10.100  
 GPNAM[3] SMSQ10.100  
 GPNAM[4] SMSQ10.100  
 GPZ1 80.00 %  
 GPZ2 20.10 %  
 GPZ3 11.00 %  
 GPZ4 -5.00 %  
 P16 1000.00 usec  
 P19 600.00 usec

F1 - Acquisition parameters  
 TD 256  
 SFO1 100.6238 MHz  
 FIDRES 196.524048 Hz  
 SW 249.991 ppm  
 FhMODE Echo-Antiecho

F2 - Processing parameters  
 SI 1024  
 SF 400.1300070 MHz  
 WDW QSINE  
 SSB 2  
 LB 0 Hz  
 GB 0  
 PC 1.40

F1 - Processing parameters  
 SI 1024  
 MC2 echo-antiecho  
 SF 100.6126777 MHz  
 WDW QSINE  
 SSB 2  
 LB 0 Hz  
 GB 0



20191011-B12C-ClStyr 20 mg white solid [Et<sub>3</sub>NH][B<sub>12</sub>H<sub>10</sub>NHCO(Camphanic)CH<sub>2</sub>CH<sub>2</sub>C<sub>6</sub>H<sub>4</sub>-4Cl] dissolved in 0.6 mL acetone-d<sub>6</sub>\*

400MHz <sup>1</sup>H{B} NMR, ◊ deuterated solvent residual peak= 2.05 ppm; ○ water peak

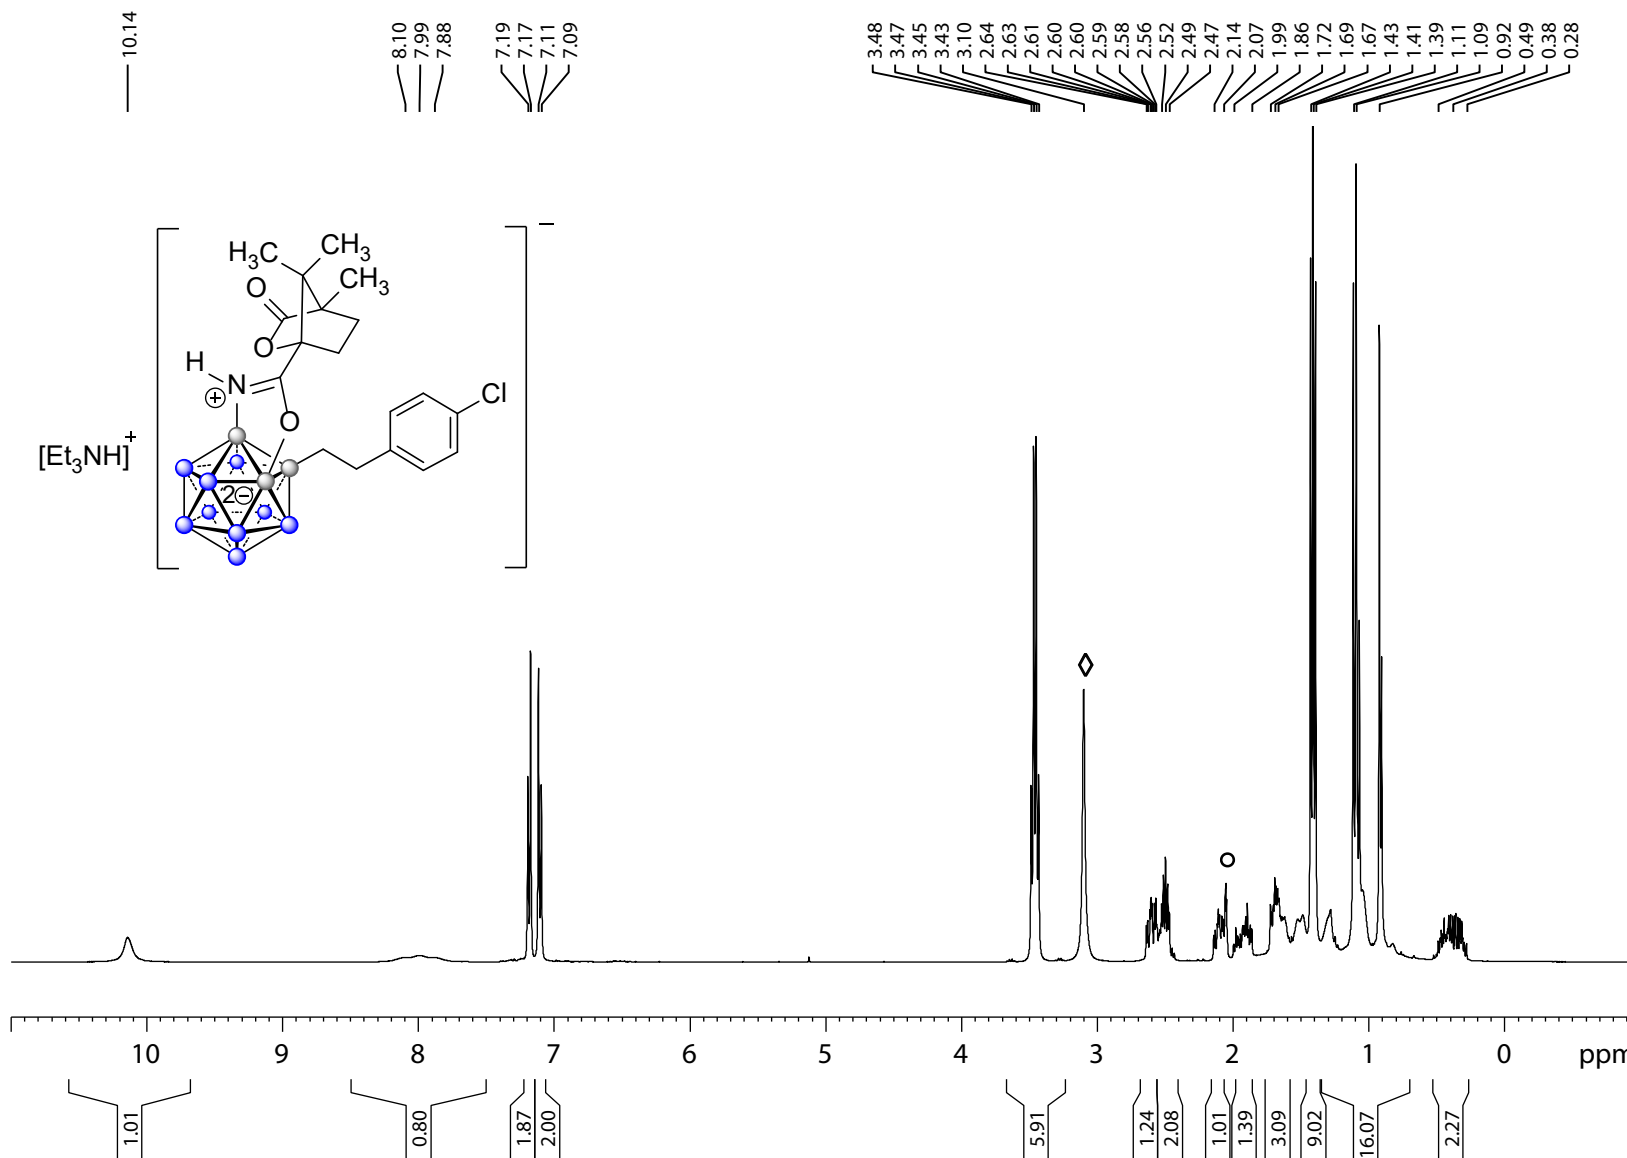

Current Data Parameters  
NAME 20191011-RV-B12C-4ClStyr  
EXPNO 2  
PROCNO 1

F2 - Acquisition Parameters  
Date 20191012  
Time 15.05  
INSTRUM spect  
PROBHD 5 mm PABBO BB/  
PULPROG zgig30  
TD 16384  
SOLVENT Acetone  
NS 16  
DS 4  
SWH 8012.820 Hz  
FIDRES 0.489064 Hz  
AQ 1.0223616 sec  
RG 33.25  
DW 62.400 usec  
DE 6.50 usec  
TE 296.1 K  
D1 1.00000000 sec  
D11 0.03000000 sec  
TD0 1

===== CHANNEL f1 =====  
NUC1 1H  
P1 15.00 usec  
PLW1 12.50000000 W  
SFO1 400.1320007 MHz

===== CHANNEL f2 =====  
CPDPRG[2] garp4  
NUC2 11B  
PCPD2 90.00 usec  
PLW2 52.96599960 W  
PLW12 0.64477998 W  
SFO2 128.3776050 MHz

F2 - Processing parameters  
SI 32768  
SF 400.1300074 MHz  
WDW EM  
SSB 0  
LB 1.00 Hz  
GB 0  
PC 1.40

20191011-B12C-ClStyr 20 mg white solid  $[\text{Et}_3\text{NH}][\text{B}_{12}\text{H}_{10}\text{NHCO}(\text{Camphanic})\text{CH}_2\text{CH}_2\text{C}_6\text{H}_4\text{-4Cl}]$  dissolved in 0.6 mL acetone- $d_6^*$

$^{11}\text{B}$  NMR 128 MHz

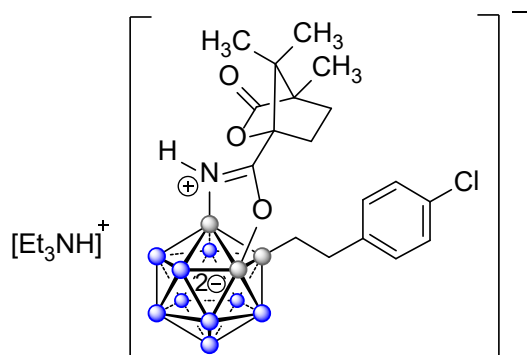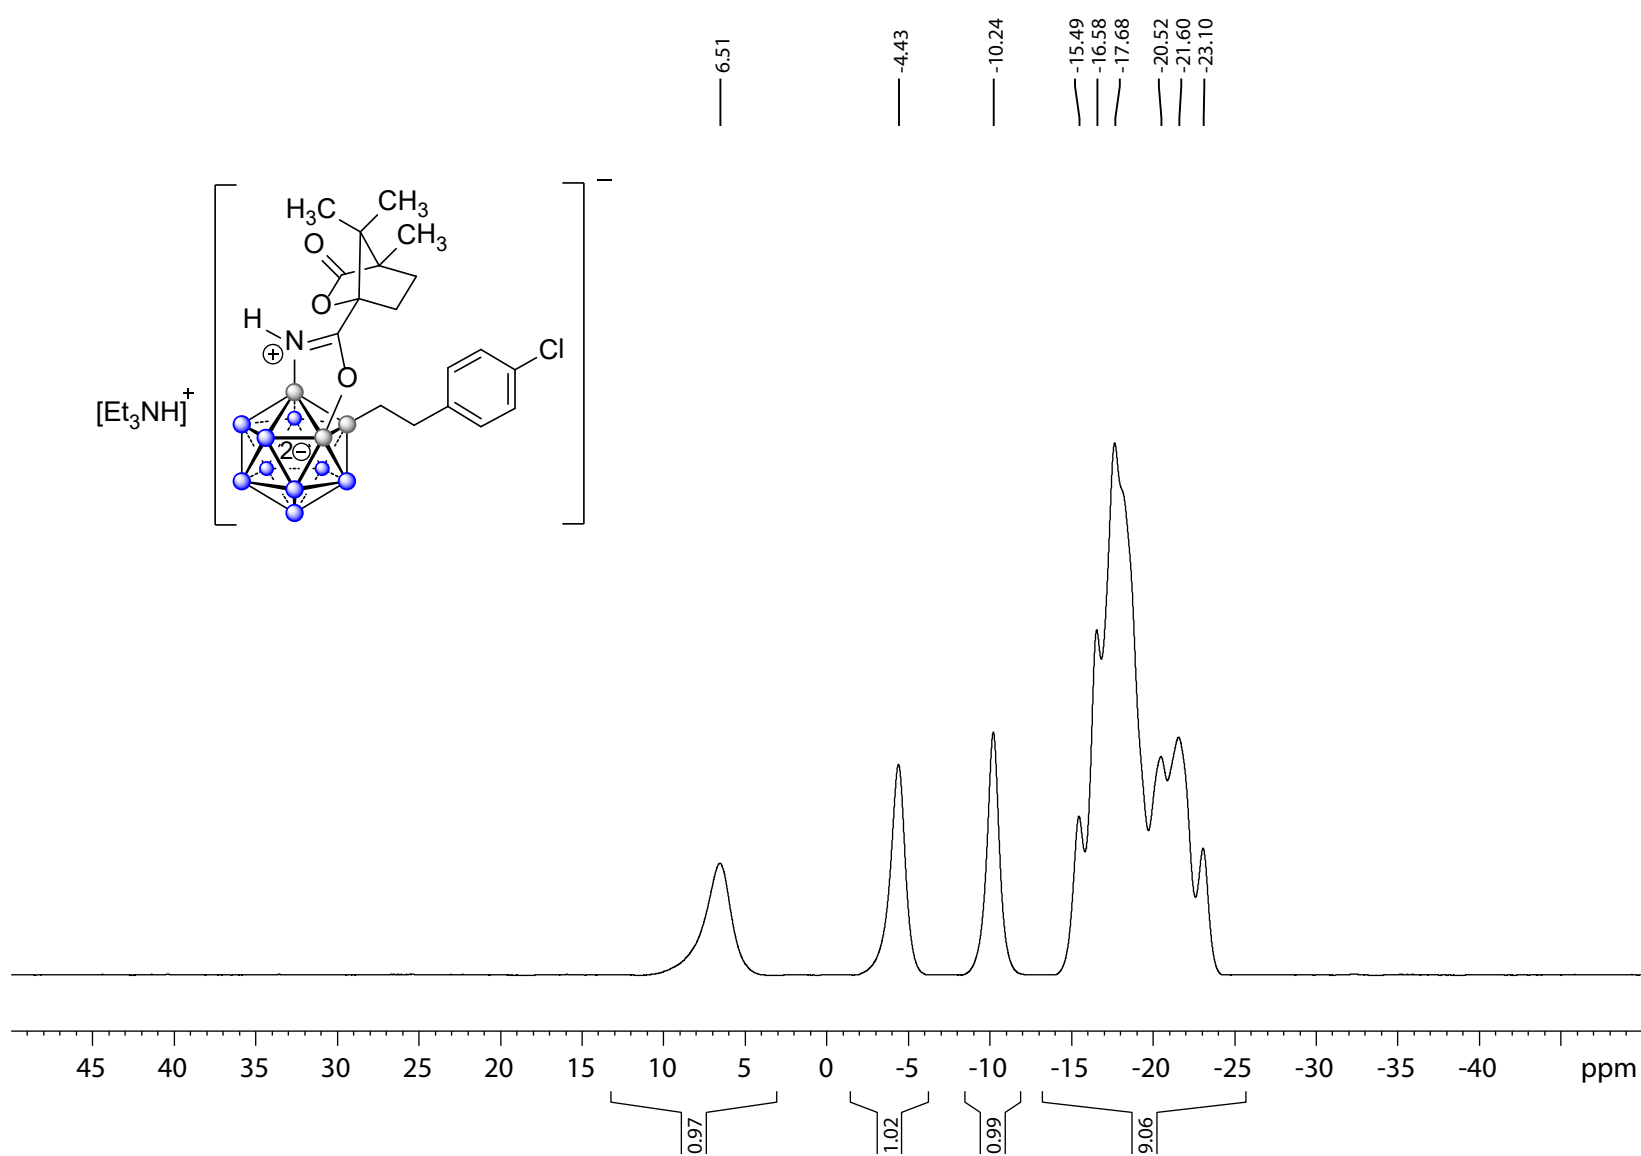

Current Data Parameters  
 NAME 20191011-RV-B12C-4ClStyr  
 EXPNO 3  
 PROCNO 1

F2 - Acquisition Parameters  
 Date\_ 20191012  
 Time\_ 15.10  
 INSTRUM spect  
 PROBHD 5 mm PABBO BB/  
 PULPROG zg  
 TD 65536  
 SOLVENT Acetone  
 NS 128  
 DS 4  
 SWH 25510.203 Hz  
 FIDRES 0.389255 Hz  
 AQ 1.2845056 sec  
 RG 193.34  
 DW 19.600 usec  
 DE 6.50 usec  
 TE 296.0 K  
 D1 1.00000000 sec  
 TD0 1

==== CHANNEL f1 =====  
 NUC1 11B  
 P1 9.93 usec  
 PLW1 52.96599960 W  
 SFO1 128.3776052 MHz

F2 - Processing parameters  
 SI 32768  
 SF 128.3776050 MHz  
 WDW EM  
 SSB 0  
 LB 10.00 Hz  
 GB 0  
 PC 1.40



20191011-B12C-ClStyr 20 mg white solid [Et<sub>3</sub>NH][B<sub>12</sub>H<sub>10</sub>NHCO(Camphanic)CH<sub>2</sub>CH<sub>2</sub>C<sub>6</sub>H<sub>4</sub>-4Cl] dissolved in 0.6 mL acetone-d<sub>6</sub>\*

<sup>13</sup>C{<sup>1</sup>H} NMR 100 MHz

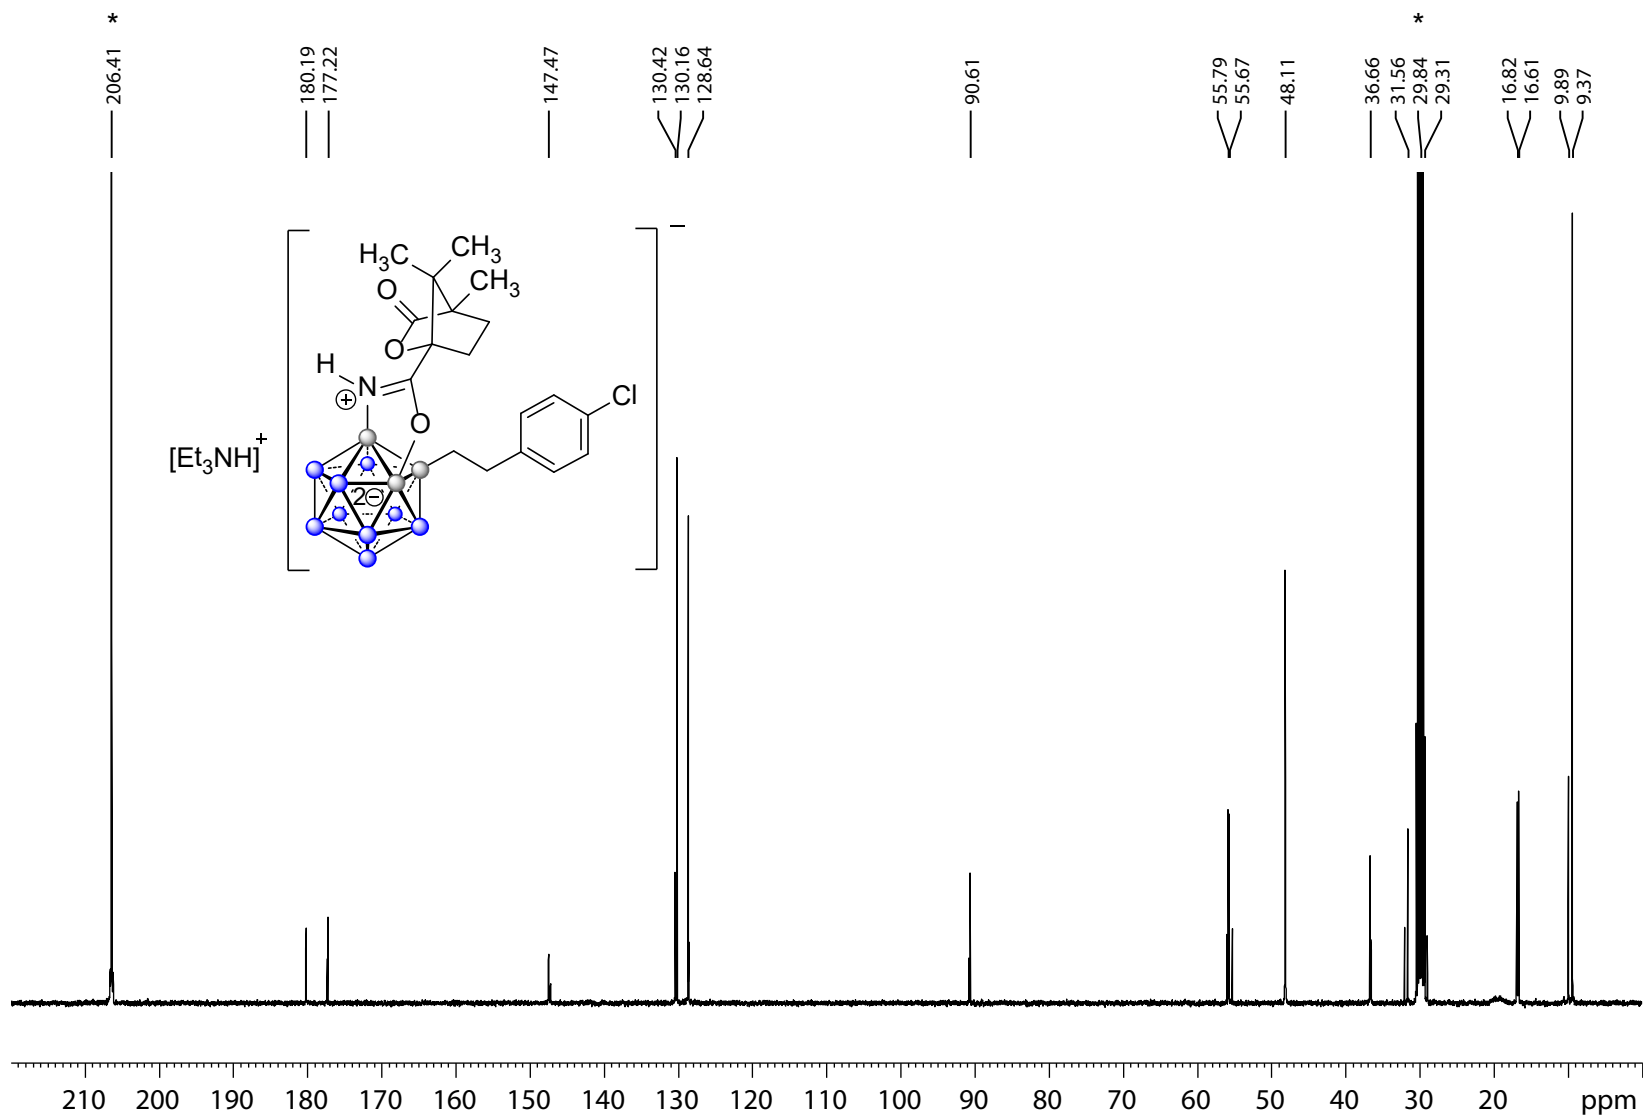

Current Data Parameters  
 NAME 20191011-RV-B12C-4ClStyr  
 EXPNO 5  
 PROCNO 1

F2 - Acquisition Parameters  
 Date\_ 20191012  
 Time\_ 16.49  
 INSTRUM spect  
 PROBHD 5 mm PABBO BB/  
 PULPROG zgpg30  
 TD 65536  
 SOLVENT Acetone  
 NS 2048  
 DS 4  
 SWH 29761.904 Hz  
 FIDRES 0.454131 Hz  
 AQ 1.1010048 sec  
 RG 193.34  
 DW 16.800 usec  
 DE 6.50 usec  
 TE 296.6 K  
 D1 1.50000000 sec  
 D11 0.03000000 sec  
 TD0 1

===== CHANNEL f1 =====  
 NUC1 13C  
 P1 10.00 usec  
 PLW1 53.00000000 W  
 SFO1 100.6228293 MHz

===== CHANNEL f2 =====  
 CPDPRG[2] waltz16  
 NUC2 1H  
 PCPD2 80.00 usec  
 PLW2 12.50000000 W  
 PLW12 0.43945000 W  
 PLW13 0.28125000 W  
 SFO2 400.1316005 MHz

F2 - Processing parameters  
 SI 32768  
 SF 100.6126889 MHz  
 WDW EM  
 SSB 0  
 LB 1.00 Hz  
 GB 0  
 PC 1.40

20191011-B12C-ClStyr 20 mg white solid  $[\text{Et}_3\text{NH}][\text{B}_{12}\text{H}_{10}\text{NHCO}(\text{Camphanic})\text{CH}_2\text{CH}_2\text{C}_6\text{H}_4\text{-4Me}]$  dissolved in 0.6 mL acetone- $d_6^*$

$^{13}\text{CDEPT}$  NMR 100 MHz

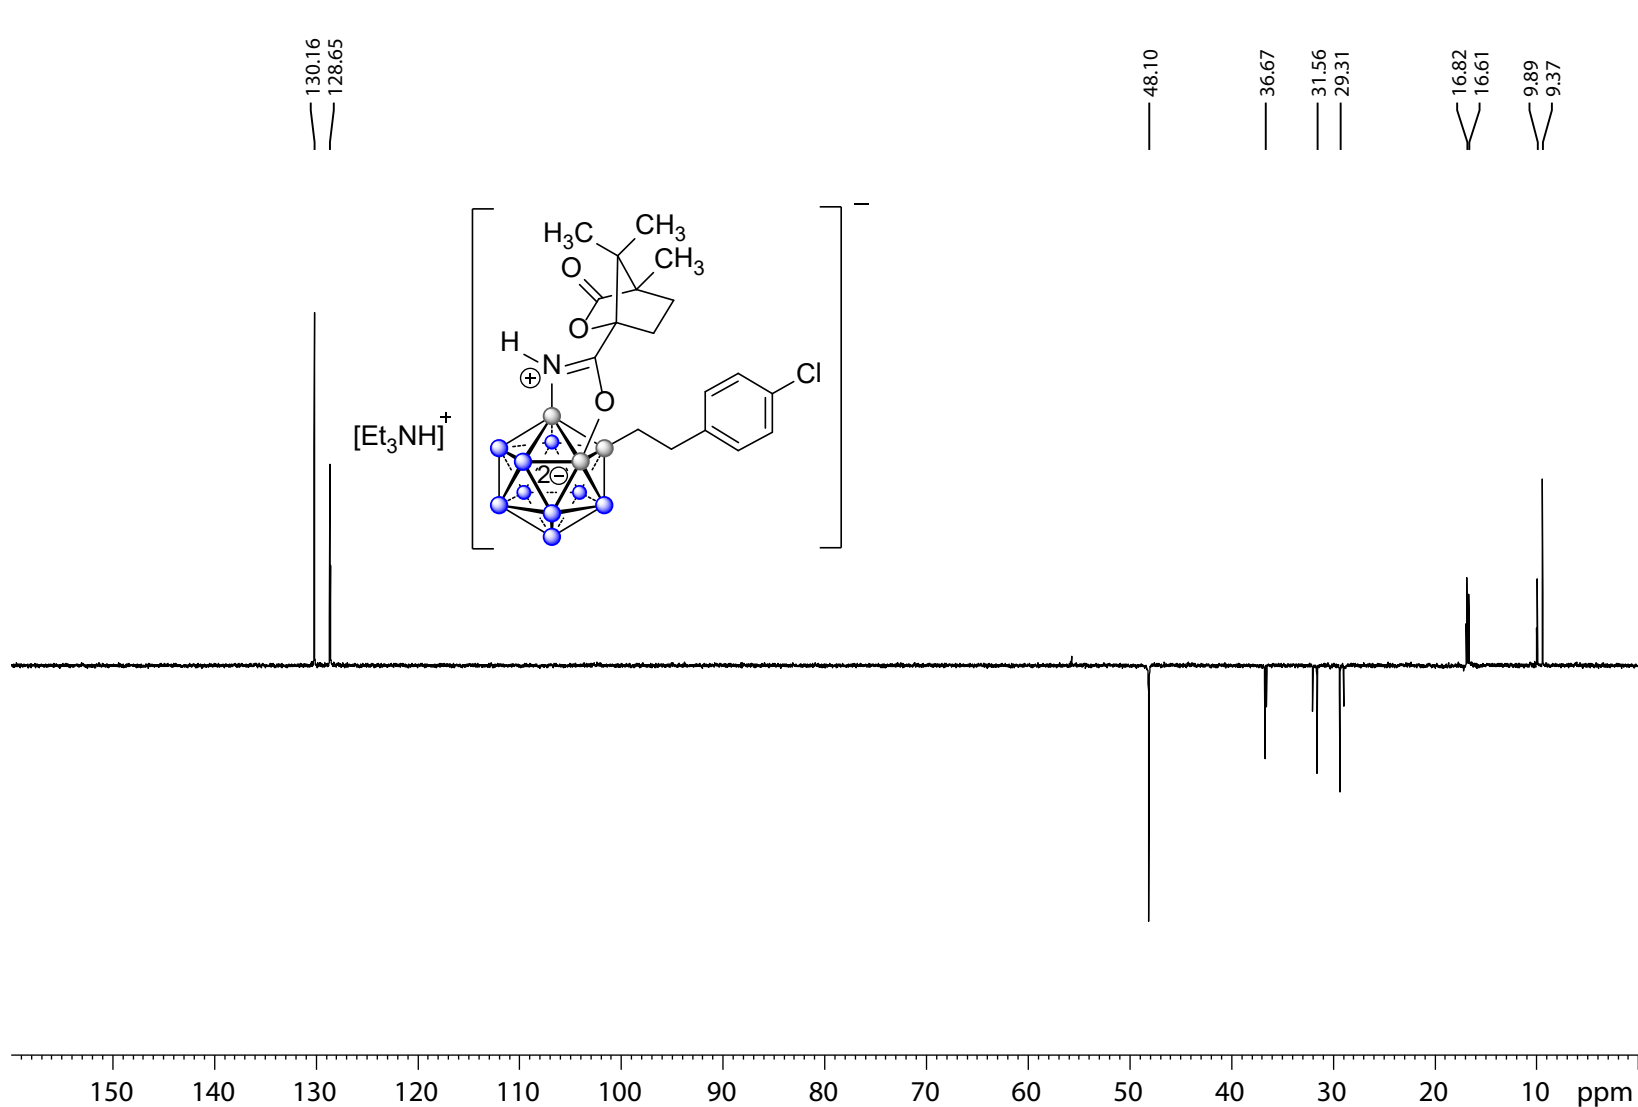

Current Data Parameters  
 NAME 20191011-RV-B12C-4ClStyr  
 EXPNO 6  
 PROCNO 1

F2 - Acquisition Parameters  
 Date\_ 20191012  
 Time\_ 17.17  
 INSTRUM spect  
 PROBHD 5 mm PABBO BB/  
 PULPROG dept135  
 TD 65536  
 SOLVENT Acetone  
 NS 512  
 DS 4  
 SWH 29296.875 Hz  
 FIDRES 0.447035 Hz  
 AQ 1.1184810 sec  
 RG 193.34  
 DW 17.067 usec  
 DE 6.50 usec  
 TE 296.3 K  
 CNST2 145.0000000  
 D1 2.00000000 sec  
 D2 0.00344828 sec  
 D12 0.00002000 sec  
 TD0 1

===== CHANNEL f1 =====  
 NUC1 13C  
 P1 10.00 usec  
 P2 20.00 usec  
 PLW1 53.00000000 W  
 SFO1 100.6228293 MHz

===== CHANNEL f2 =====  
 CPDPRG[2] waltz16  
 NUC2 1H  
 P3 15.00 usec  
 P4 30.00 usec  
 PCPD2 80.00 usec  
 PLW2 12.50000000 W  
 PLW12 0.43945000 W  
 SFO2 400.1316005 MHz

F2 - Processing parameters  
 SI 32768  
 SF 100.6126887 MHz  
 WDW EM  
 SSB 0  
 LB 1.00 Hz  
 GB 0  
 PC 4.00

20191011-B12C-ClStyr 20 mg white solid [Et<sub>3</sub>NH][B<sub>12</sub>H<sub>10</sub>NHCO(Camphanic)CH<sub>2</sub>CH<sub>2</sub>C<sub>6</sub>H<sub>4</sub>-4-Cl dissolved in 0.6 mL acetone-d<sub>6</sub>\*

<sup>1</sup>H - <sup>1</sup>H COSY NMR

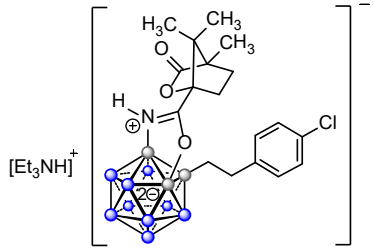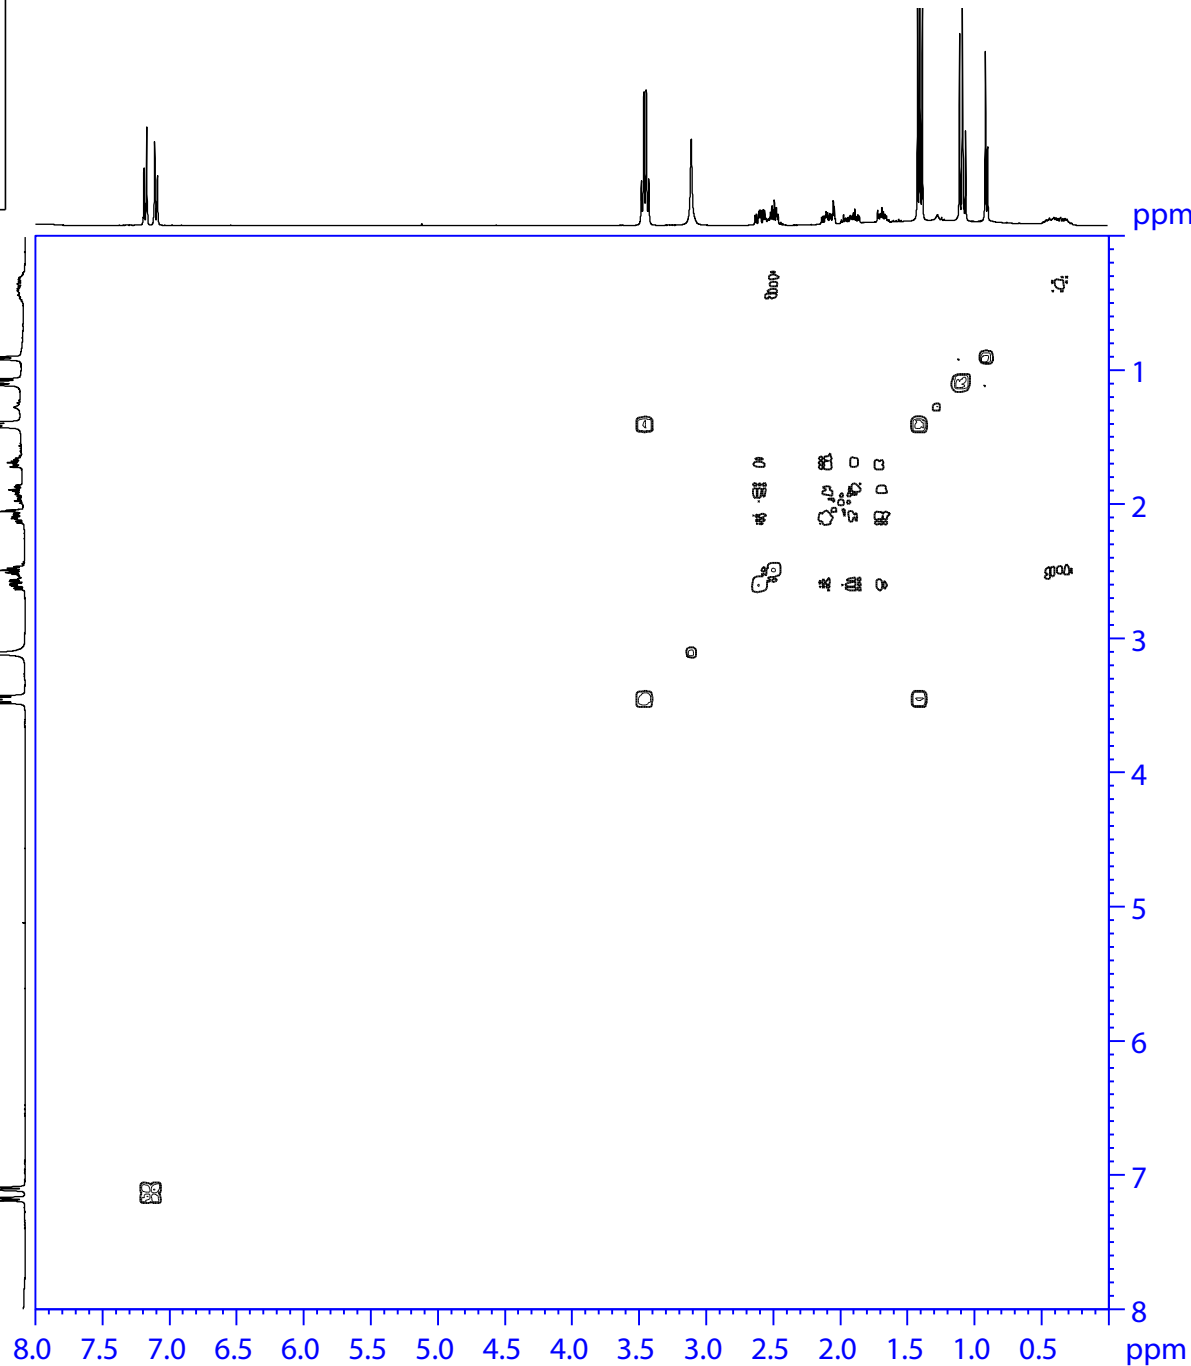

Current Data Parameters  
NAME 20191011-RV-B12C-4ClStyr  
EXPNO 8  
PROCNO 1

F2 - Acquisition Parameters  
Date 20191012  
Time 17.33  
INSTRUM spect  
PROBHD 5 mm PABBO BB/  
PULPROG cosygpppqf  
TD 2048  
SOLVENT Acetone  
NS 2  
DS 8  
SWH 5341.880 Hz  
FIDRES 2.608340 Hz  
AQ 0.1916928 sec  
RG 95.29  
DW 93.600 usec  
DE 6.50 usec  
TE 296.1 K  
D0 0.00000300 sec  
D1 2.00000000 sec  
D11 0.03000000 sec  
D12 0.00002000 sec  
D13 0.00000400 sec  
D16 0.00020000 sec  
IN0 0.00018720 sec

===== CHANNEL f1 =====  
NUC1 1H  
P0 15.00 usec  
P1 15.00 usec  
P17 2500.00 usec  
PLW1 12.50000000 W  
PLW10 4.16050005 W  
SFO1 400.1324057 MHz

===== GRADIENT CHANNEL =====  
GPNAM[1] SMSQ10.100  
GPZ1 10.00 %  
P16 1000.00 usec

F1 - Acquisition parameters  
TD 128  
SFO1 400.1324 MHz  
FIDRES 83.466881 Hz  
SW 13.350 ppm  
FnMODE QF

F2 - Processing parameters  
SI 1024  
SF 400.1300086 MHz  
WDW QSINE  
SSB 0  
LB 0 Hz  
GB 0  
PC 1.40

F1 - Processing parameters  
SI 1024  
MC2 QF  
SF 400.1300080 MHz  
WDW QSINE  
SSB 0  
LB 0 Hz  
GB 0



20191011-B12C-ClStyr 20 mg white solid [Et<sub>3</sub>NH][B<sub>12</sub>H<sub>10</sub>NHCO(Camphanic)CH<sub>2</sub>CH<sub>2</sub>C<sub>6</sub>H<sub>4</sub>-4Cl] dissolved in 0.6 mL acetone-d<sub>6</sub>\*

<sup>1</sup>H - <sup>13</sup>C HSQC NMR

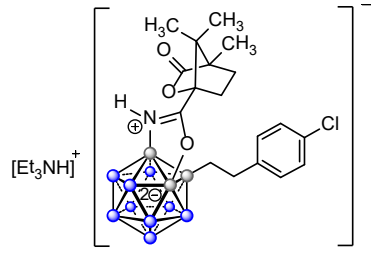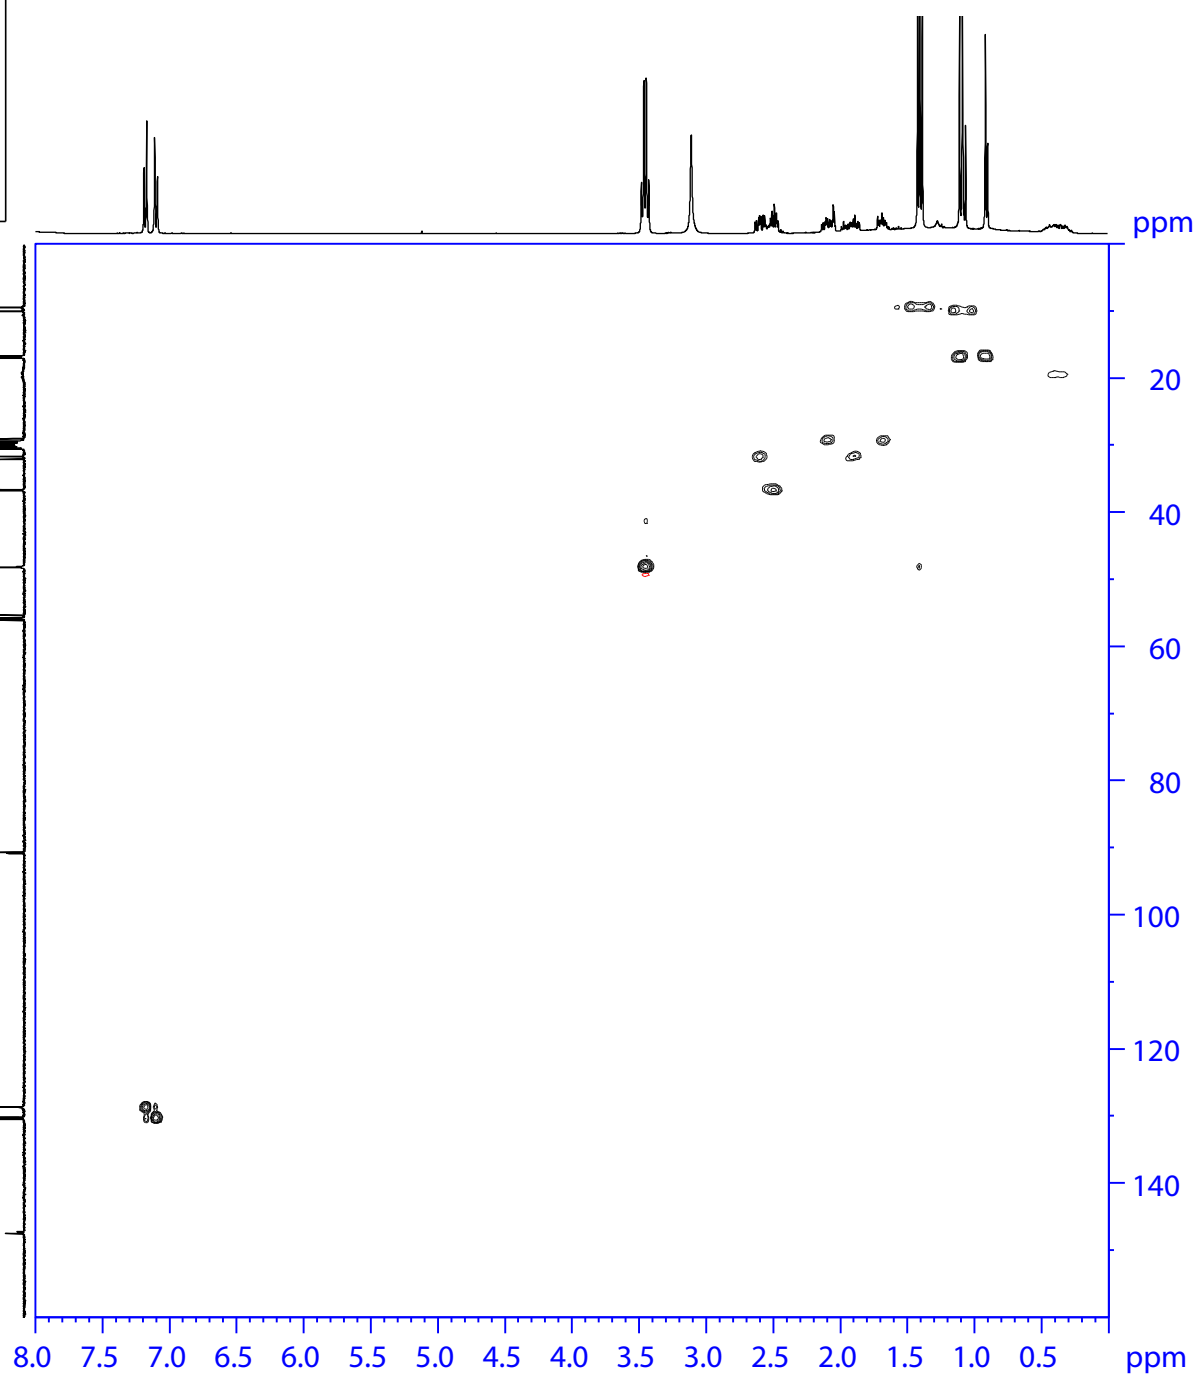

```

Current Data Parameters
NAME      20191011-RV-B12C-4ClStyr
EXPNO     7
PROCNO    1

F2 - Acquisition Parameters
Date_     20191012
Time      17.19
INSTRUM   spect
PROBHD    5 mm PABBO BB/
PULPROG   hsqcetgps12
TD         1024
SOLVENT   Acetone
NS         2
DS         16
SWH        6009.615 Hz
FIDRES     5.868765 Hz
AQ         0.0851968 sec
RG         193.34
DW         83.200 usec
DE         6.50 usec
TE         296.2 K
CNST2     145.0000000
D0         0.00000300 sec
D1         1.50000000 sec
D4         0.00172414 sec
D11        0.03000000 sec
D16        0.00020000 sec
D24        0.00086207 sec
INO        0.00001990 sec
ZGOPTNS

===== CHANNEL f1 =====
NUC1       1H
P1         15.00 usec
P2         30.00 usec
P28        1000.00 usec
PLW1       12.50000000 W
SFO1       400.1328009 MHz

===== CHANNEL f2 =====
CPDPRG[2]  garp
NUC2       13C
P3         10.00 usec
P4         20.00 usec
PCPD2      70.00 usec
PLW2       53.00000000 W
PLW12      1.08159995 W
SFO2       100.6238364 MHz

===== GRADIENT CHANNEL =====
GPNAM[1]   SMSQ10.100
GPNAM[2]   SMSQ10.100
GPNAM[3]   SMSQ10.100
GPNAM[4]   SMSQ10.100
GPZ1       80.00 %
GPZ2       20.10 %
GPZ3       11.00 %
GPZ4       -5.00 %
P16        1000.00 usec
P19        600.00 usec

F1 - Acquisition parameters
TD         256
SFO1       100.6238 MHz
FIDRES     196.524048 Hz
SW         249.991 ppm
FhMODE     Echo-Antiecho

F2 - Processing parameters
SI         1024
SF         400.1300093 MHz
WDW        QSINE
SSB        2
LB         0 Hz
GB         0
PC         1.40

F1 - Processing parameters
SI         1024
MC2        echo-antiecho
SF         100.6126709 MHz
WDW        QSINE
SSB        2
LB         0 Hz
GB         0
    
```

20191014-B12C-BrStyr 20 mg white solid  $[\text{Et}_3\text{NH}][\text{B}_{12}\text{H}_{10}\text{NHCO}(\text{Camphanic})\text{CH}_2\text{CH}_2\text{C}_6\text{H}_4\text{-4Br}]$  dissolved in 0.6 mL acetone- $d_6^*$

400MHz  $^1\text{H}$  NMR,  $\circ$  deuterated solvent residual peak= 2.05 ppm;  $\diamond$  water peak

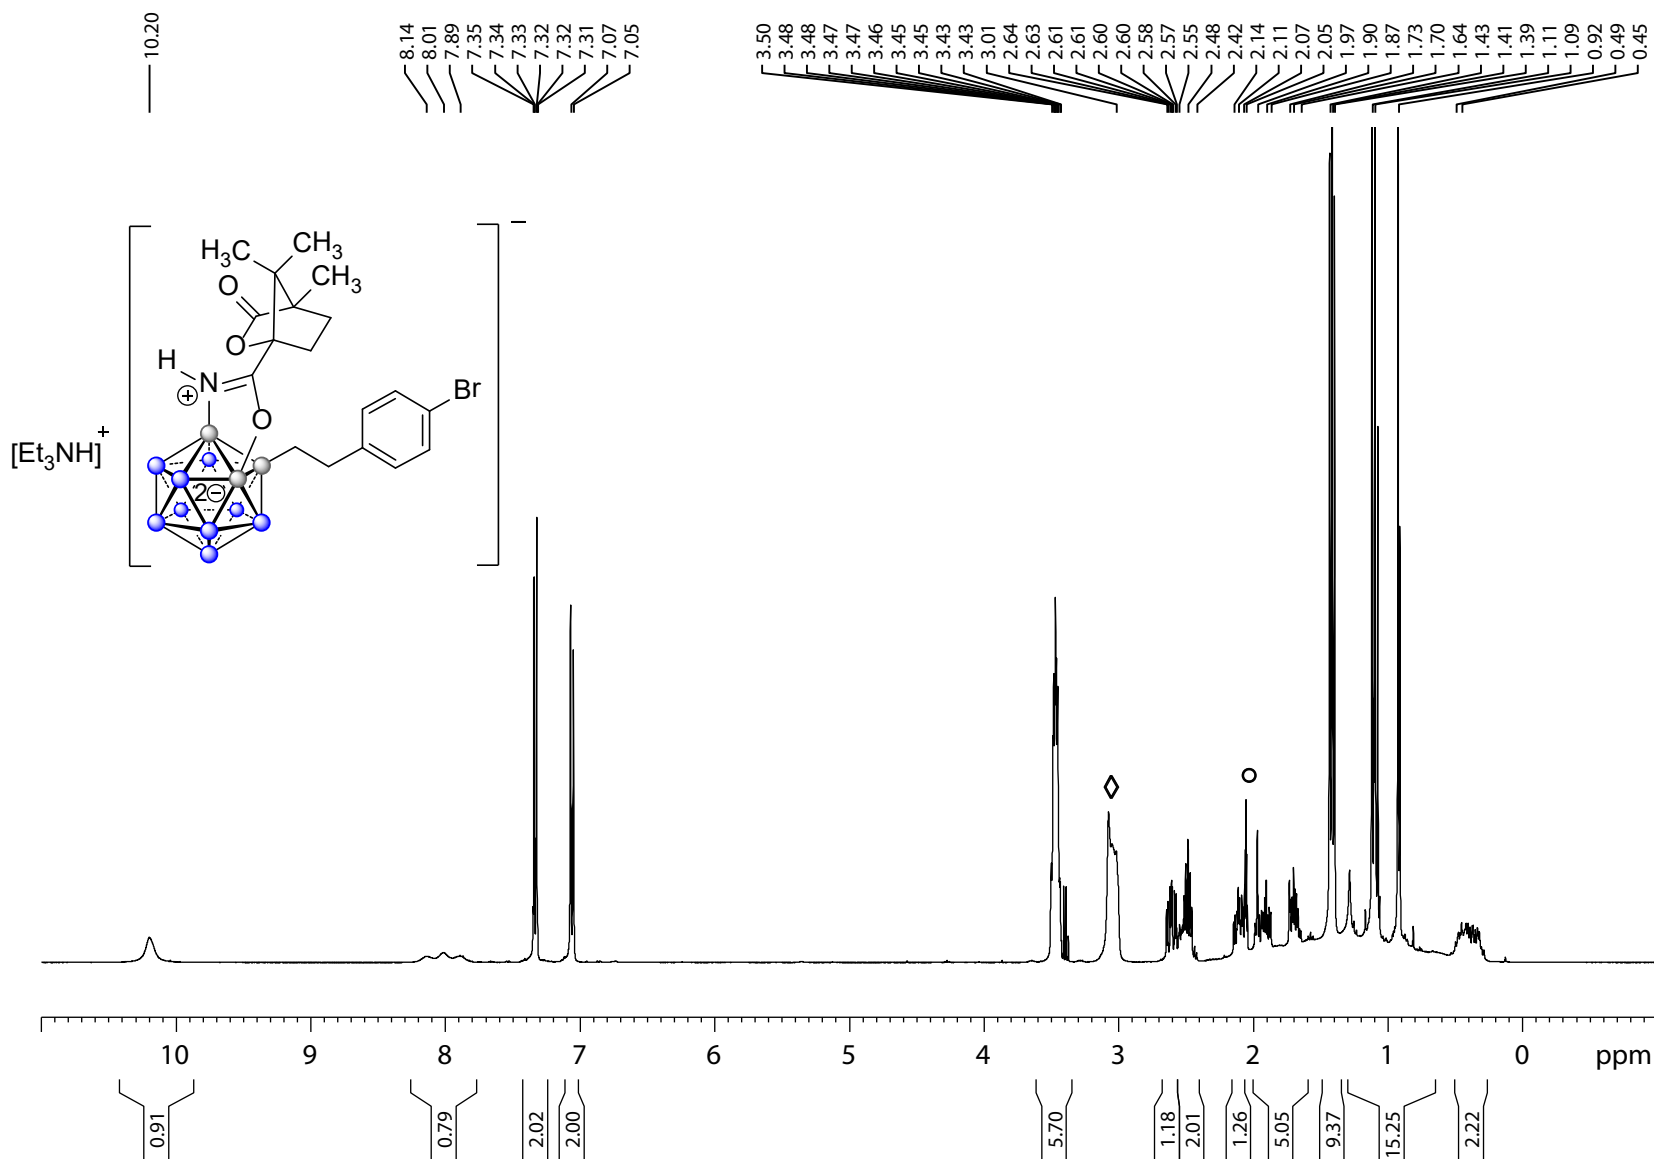

Current Data Parameters  
 NAME 20191014-RV-B12C-4BrStyr  
 EXPNO 1  
 PROCNO 1

F2 - Acquisition Parameters  
 Date\_ 20191014  
 Time\_ 10.06  
 INSTRUM spect  
 PROBHD 5 mm PABBO BB/  
 PULPROG zg30  
 TD 65536  
 SOLVENT Acetone  
 NS 16  
 DS 2  
 SWH 10000.000 Hz  
 FIDRES 0.152588 Hz  
 AQ 3.2767999 sec  
 RG 64.43  
 DW 50.000 usec  
 DE 6.50 usec  
 TE 296.2 K  
 D1 1.00000000 sec  
 TD0 1

===== CHANNEL f1 =====  
 NUC1 1H  
 P1 15.00 usec  
 PLW1 12.50000000 W  
 SFO1 400.1328009 MHz

F2 - Processing parameters  
 SI 65536  
 SF 400.1300072 MHz  
 WDW EM  
 SSB 0  
 LB 0.30 Hz  
 GB 0  
 PC 1.00

20191014-B12C-BrStyr 20 mg white solid  $[\text{Et}_3\text{NH}][\text{B}_{12}\text{H}_{10}\text{NHCO}(\text{Camphanic})\text{CH}_2\text{CH}_2\text{C}_6\text{H}_4\text{-4Br}]$  dissolved in 0.6 mL acetone- $d_6^*$

400MHz  $^1\text{H}\{\text{B}\}$  NMR, o deuterated solvent residual peak= 2.05 ppm;  $\diamond$  water peak

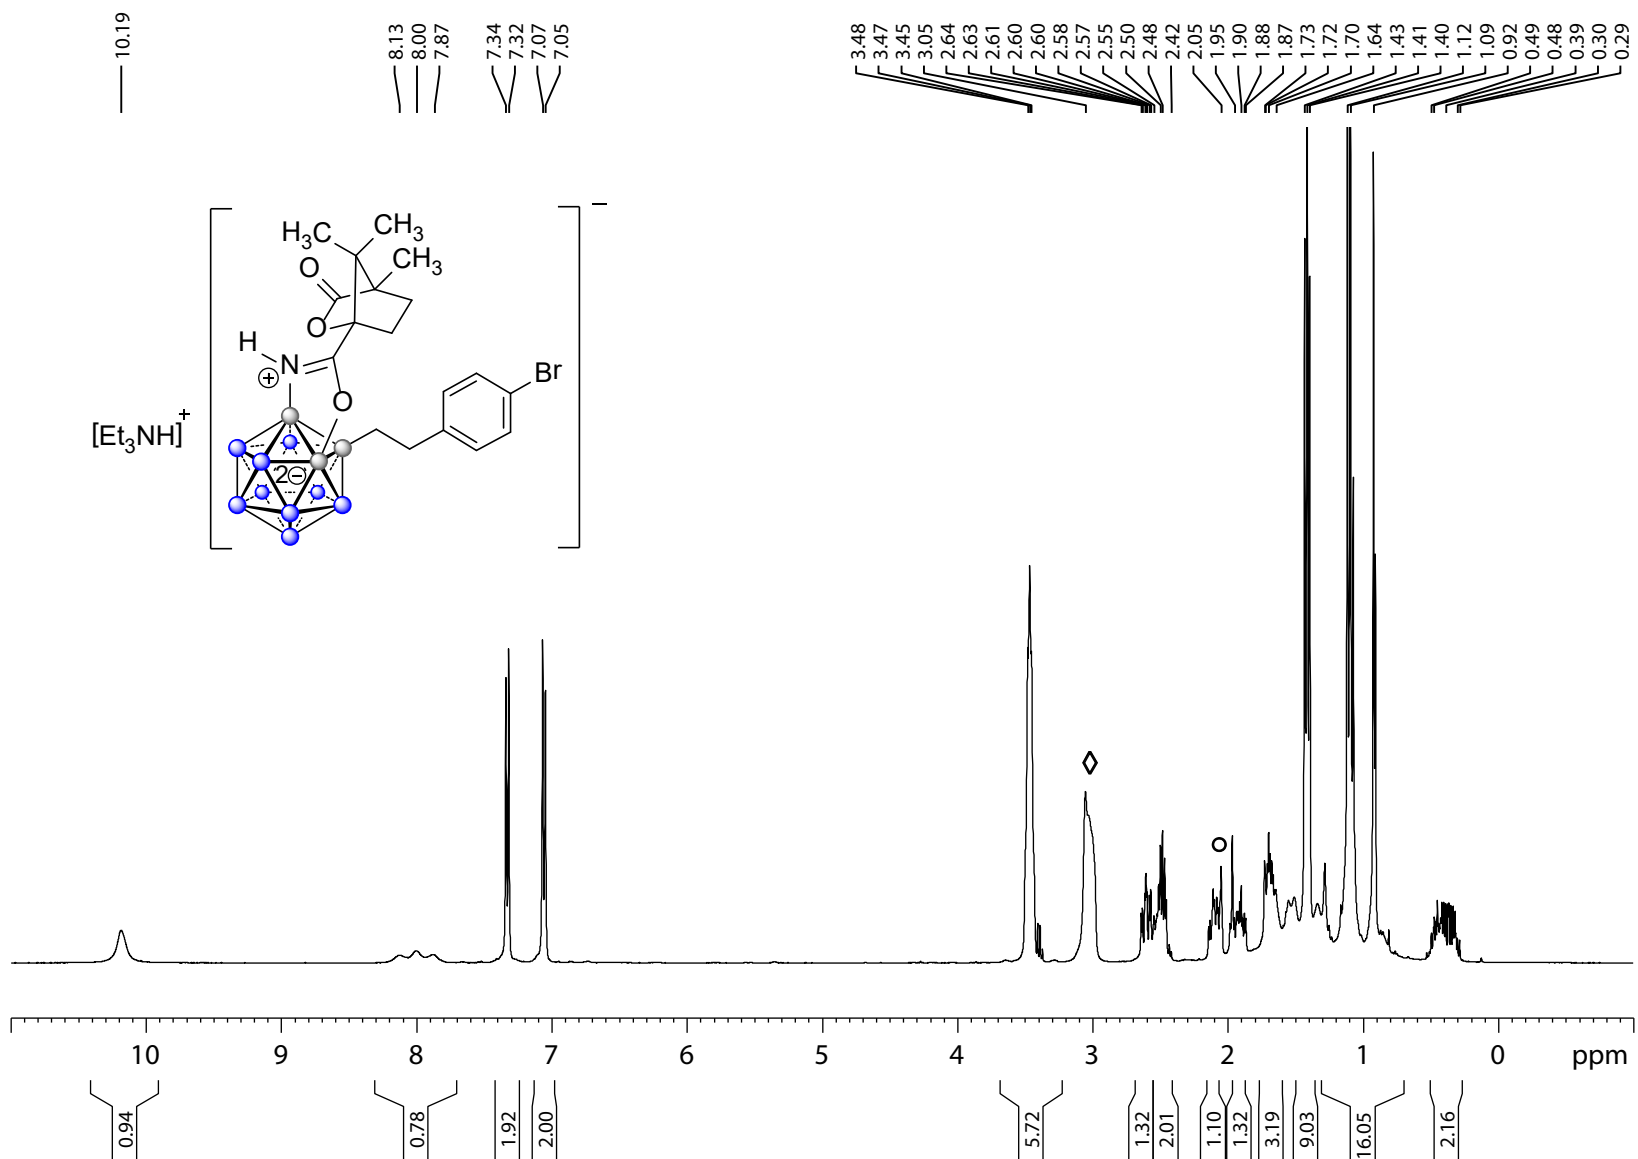

```

Current Data Parameters
NAME      20191014-RV-B12C-4BrStyr
EXPNO     2
PROCNO    1

F2 - Acquisition Parameters
Date_     20191014
Time      10.08
INSTRUM   spect
PROBHD    5 mm PABBO BB/
PULPROG   zgig30
TD         16384
SOLVENT   Acetone
NS         16
DS         4
SWH        8012.820 Hz
FIDRES     0.489064 Hz
AQ         1.0223616 sec
RG         39.73
DW         62.400 usec
DE         6.50 usec
TE         296.5 K
D1         1.00000000 sec
D11        0.03000000 sec
TD0        1

===== CHANNEL f1 =====
NUC1       1H
P1         15.00 usec
PLW1       12.50000000 W
SFO1       400.1320007 MHz

===== CHANNEL f2 =====
CPDPRG[2]  garp4
NUC2       11B
PCPD2      90.00 usec
PLW2       52.96599960 W
PLW12      0.64477998 W
SFO2       128.3776050 MHz

F2 - Processing parameters
SI         32768
SF         400.1300073 MHz
WDW        EM
SSB        0
LB         1.00 Hz
GB         0
PC         1.40
    
```

20191014-B12C-BrStyr 20 mg white solid  $[\text{Et}_3\text{NH}][\text{B}_{12}\text{H}_{10}\text{NHCO}(\text{Camphanic})\text{CH}_2\text{CH}_2\text{C}_6\text{H}_4\text{-4Br}]$  dissolved in 0.6 mL acetone- $d_6^*$

$^{11}\text{B}$  NMR 128 MHz

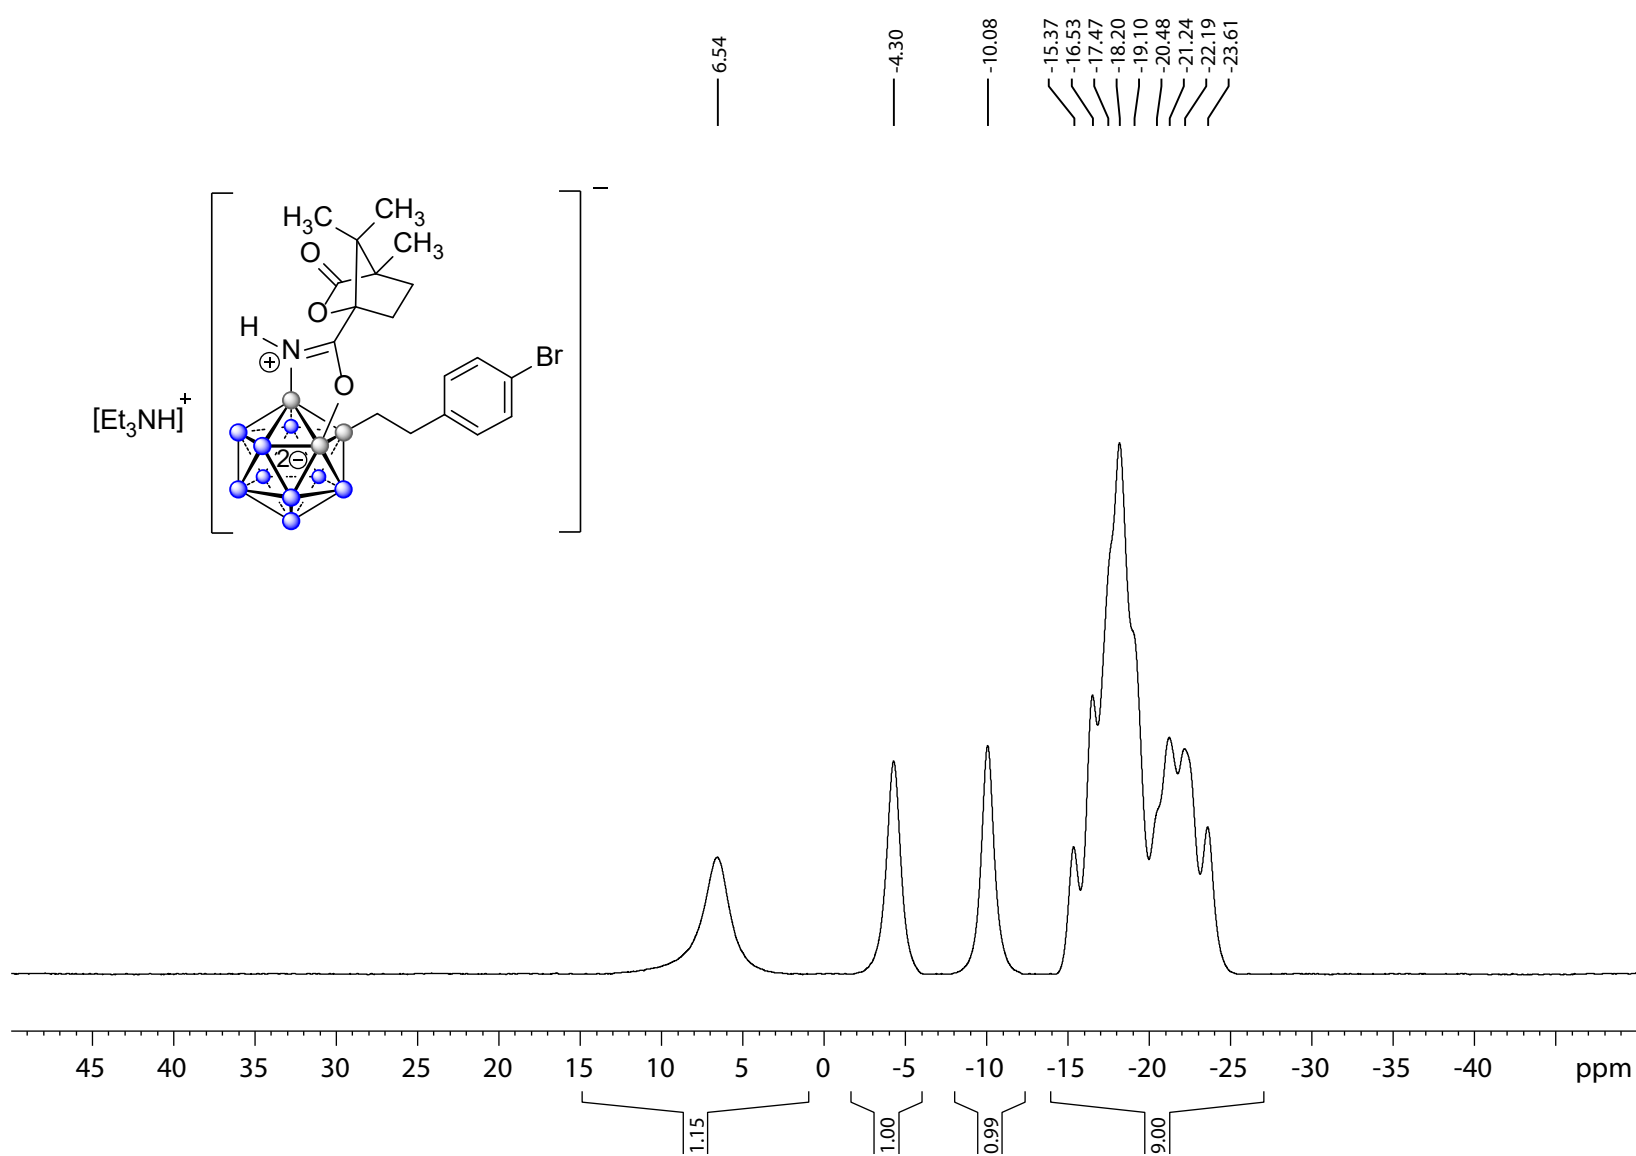

Current Data Parameters  
NAME 20191014-RV-B12C-4BrStyr  
EXPNO 3  
PROCNO 1

F2 - Acquisition Parameters  
Date\_ 20191014  
Time 10.14  
INSTRUM spect  
PROBHD 5 mm PABBO BB/  
PULPROG zg  
TD 65536  
SOLVENT Acetone  
NS 128  
DS 4  
SWH 25510.203 Hz  
FIDRES 0.389255 Hz  
AQ 1.2845056 sec  
RG 193.34  
DW 19.600 usec  
DE 6.50 usec  
TE 295.7 K  
D1 1.0000000 sec  
TD0 1

==== CHANNEL f1 =====  
NUC1 11B  
P1 9.93 usec  
PLW1 52.96599960 W  
SFO1 128.3776052 MHz

F2 - Processing parameters  
SI 32768  
SF 128.3776050 MHz  
WDW EM  
SSB 0  
LB 10.00 Hz  
GB 0  
PC 1.40

20191014-B12C-BrStyr 20 mg white solid [Et<sub>3</sub>NH][B<sub>12</sub>H<sub>10</sub>NHCO(Camphanic)CH<sub>2</sub>CH<sub>2</sub>C<sub>6</sub>H<sub>4</sub>-4Br] dissolved in 0.6 mL acetone-d<sub>6</sub>\*

<sup>11</sup>B{<sup>1</sup>H} NMR 128 MHz

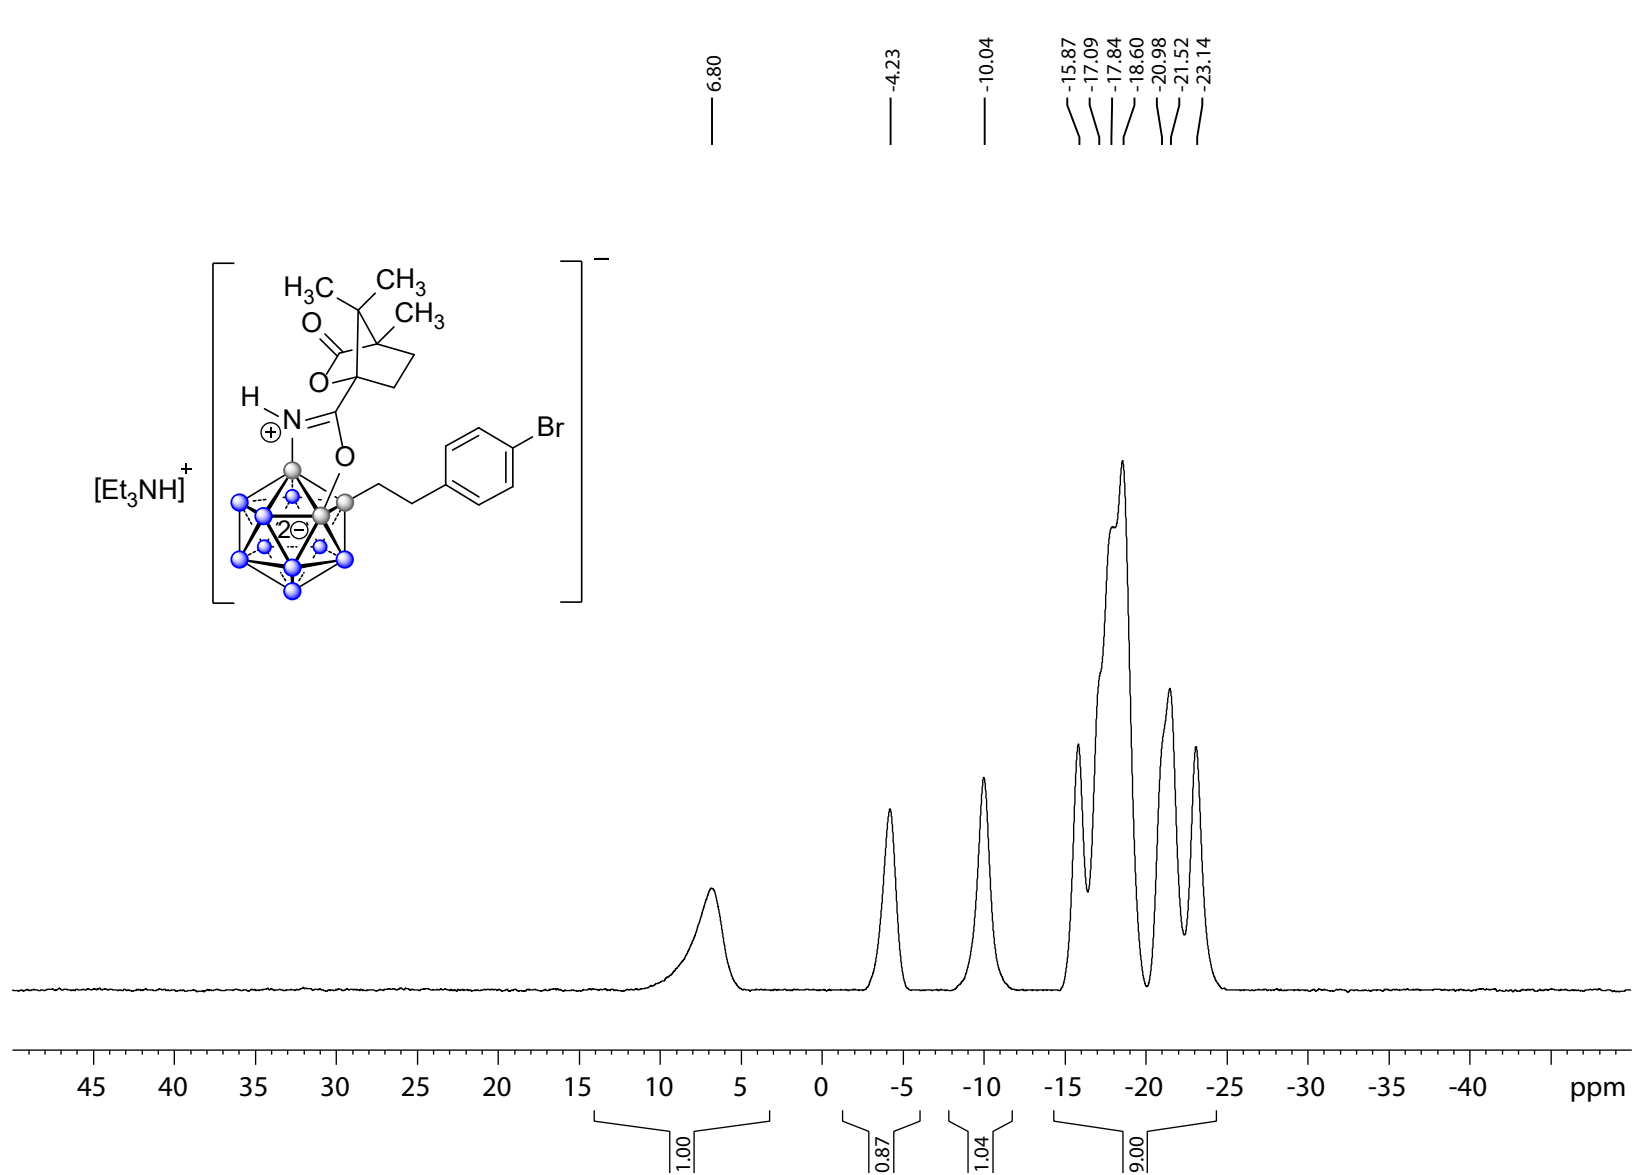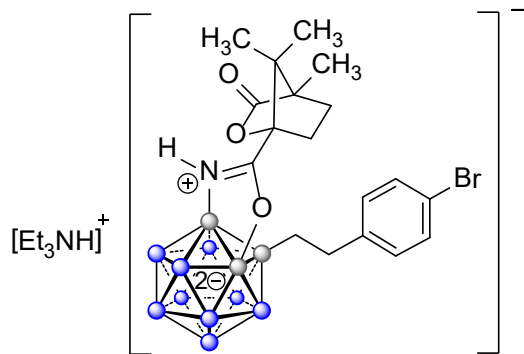

Current Data Parameters  
NAME 20191014-RV-B12C-4BrStyr  
EXPNO 4  
PROCNO 1

F2 - Acquisition Parameters  
Date\_ 20191014  
Time 10.20  
INSTRUM spect  
PROBHD 5 mm PABBO BB/  
PULPROG zgpg30  
TD 65536  
SOLVENT Acetone  
NS 128  
DS 4  
SWH 25510.203 Hz  
FIDRES 0.389255 Hz  
AQ 1.2845056 sec  
RG 193.34  
DW 19.600 usec  
DE 6.50 usec  
TE 296.6 K  
D1 1.00000000 sec  
D11 0.03000000 sec  
TD0 1

===== CHANNEL f1 =====  
NUC1 11B  
P1 9.93 usec  
PLW1 52.96599960 W  
SFO1 128.3776050 MHz

===== CHANNEL f2 =====  
CPDPRG[2] waltz16  
NUC2 1H  
PCPD2 80.00 usec  
PLW2 12.50000000 W  
PLW12 0.43945000 W  
PLW13 0.28125000 W  
SFO2 400.1320007 MHz

F2 - Processing parameters  
SI 32768  
SF 128.3776050 MHz  
WDW EM  
SSB 0  
LB 10.00 Hz  
GB 0  
PC 1.40

NMR-083

20191014-B12C-BrStyr 20 mg white solid [Et<sub>3</sub>NH][B<sub>12</sub>H<sub>10</sub>NHCO(Camphanic)CH<sub>2</sub>CH<sub>2</sub>C<sub>6</sub>H<sub>4</sub>-4Br] dissolved in 0.6 mL acetone-d<sub>6</sub>\*

<sup>13</sup>C{<sup>1</sup>H} NMR 100 MHz

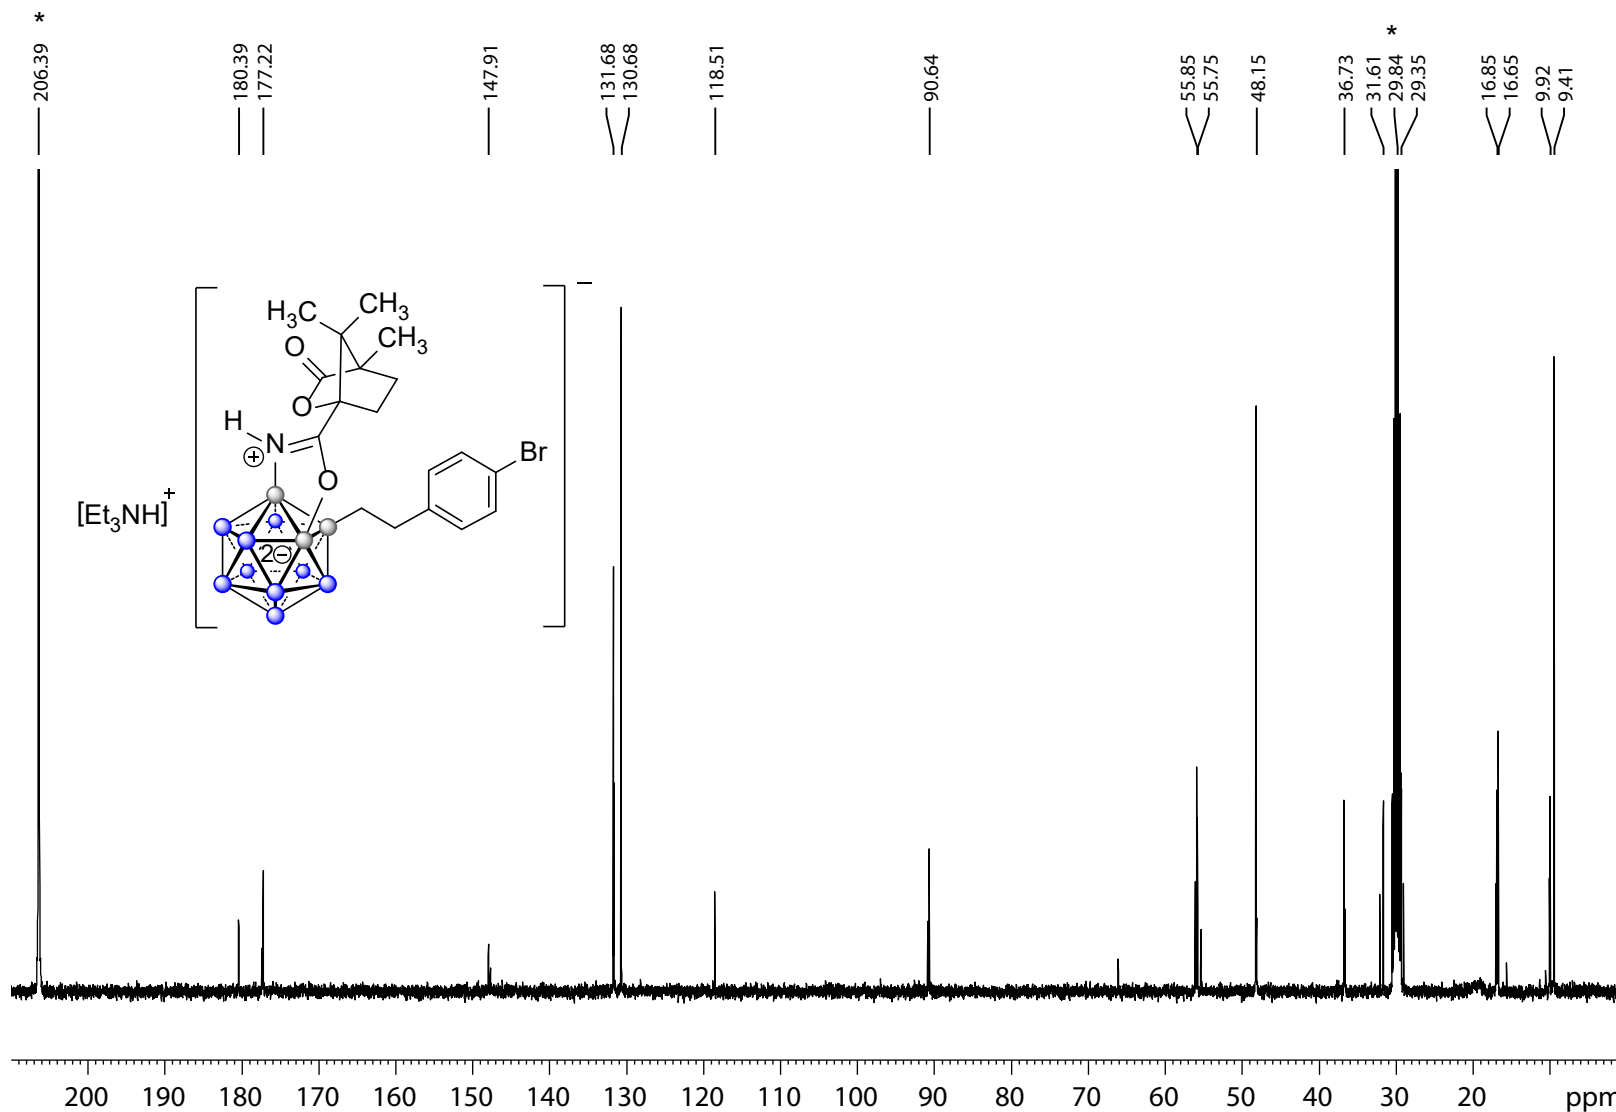

Current Data Parameters  
 NAME 20191014-RV-B12C-4BrStyr  
 EXPNO 5  
 PROCNO 1

F2 - Acquisition Parameters  
 Date\_ 20191014  
 Time\_ 11.07  
 INSTRUM spect  
 PROBHD 5 mm PABBO BB/  
 PULPROG zgpg30  
 TD 65536  
 SOLVENT Acetone  
 NS 1024  
 DS 4  
 SWH 29761.904 Hz  
 FIDRES 0.454131 Hz  
 AQ 1.1010048 sec  
 RG 193.34  
 DW 16.800 usec  
 DE 6.50 usec  
 TE 296.6 K  
 D1 1.50000000 sec  
 D11 0.03000000 sec  
 TD0 1

===== CHANNEL f1 =====  
 NUC1 13C  
 P1 10.00 usec  
 PLW1 53.00000000 W  
 SFO1 100.6228293 MHz

===== CHANNEL f2 =====  
 CPDPRG[2] waltz16  
 NUC2 1H  
 PCPD2 80.00 usec  
 PLW2 12.50000000 W  
 PLW12 0.43945000 W  
 PLW13 0.28125000 W  
 SFO2 400.1316005 MHz

F2 - Processing parameters  
 SI 32768  
 SF 100.6126841 MHz  
 WDW EM  
 SSB 0  
 LB 1.00 Hz  
 GB 0  
 PC 1.40

20191014-B12C-BrStyr 20 mg white solid  $[\text{Et}_3\text{NH}][\text{B}_{12}\text{H}_{10}\text{NHC}(\text{Camphanic})\text{CH}_2\text{CH}_2\text{C}_6\text{H}_4\text{-4Br}]$  dissolved in 0.6 mL acetone- $d_6^*$

$^{13}\text{CDEPT}$  NMR 100 MHz

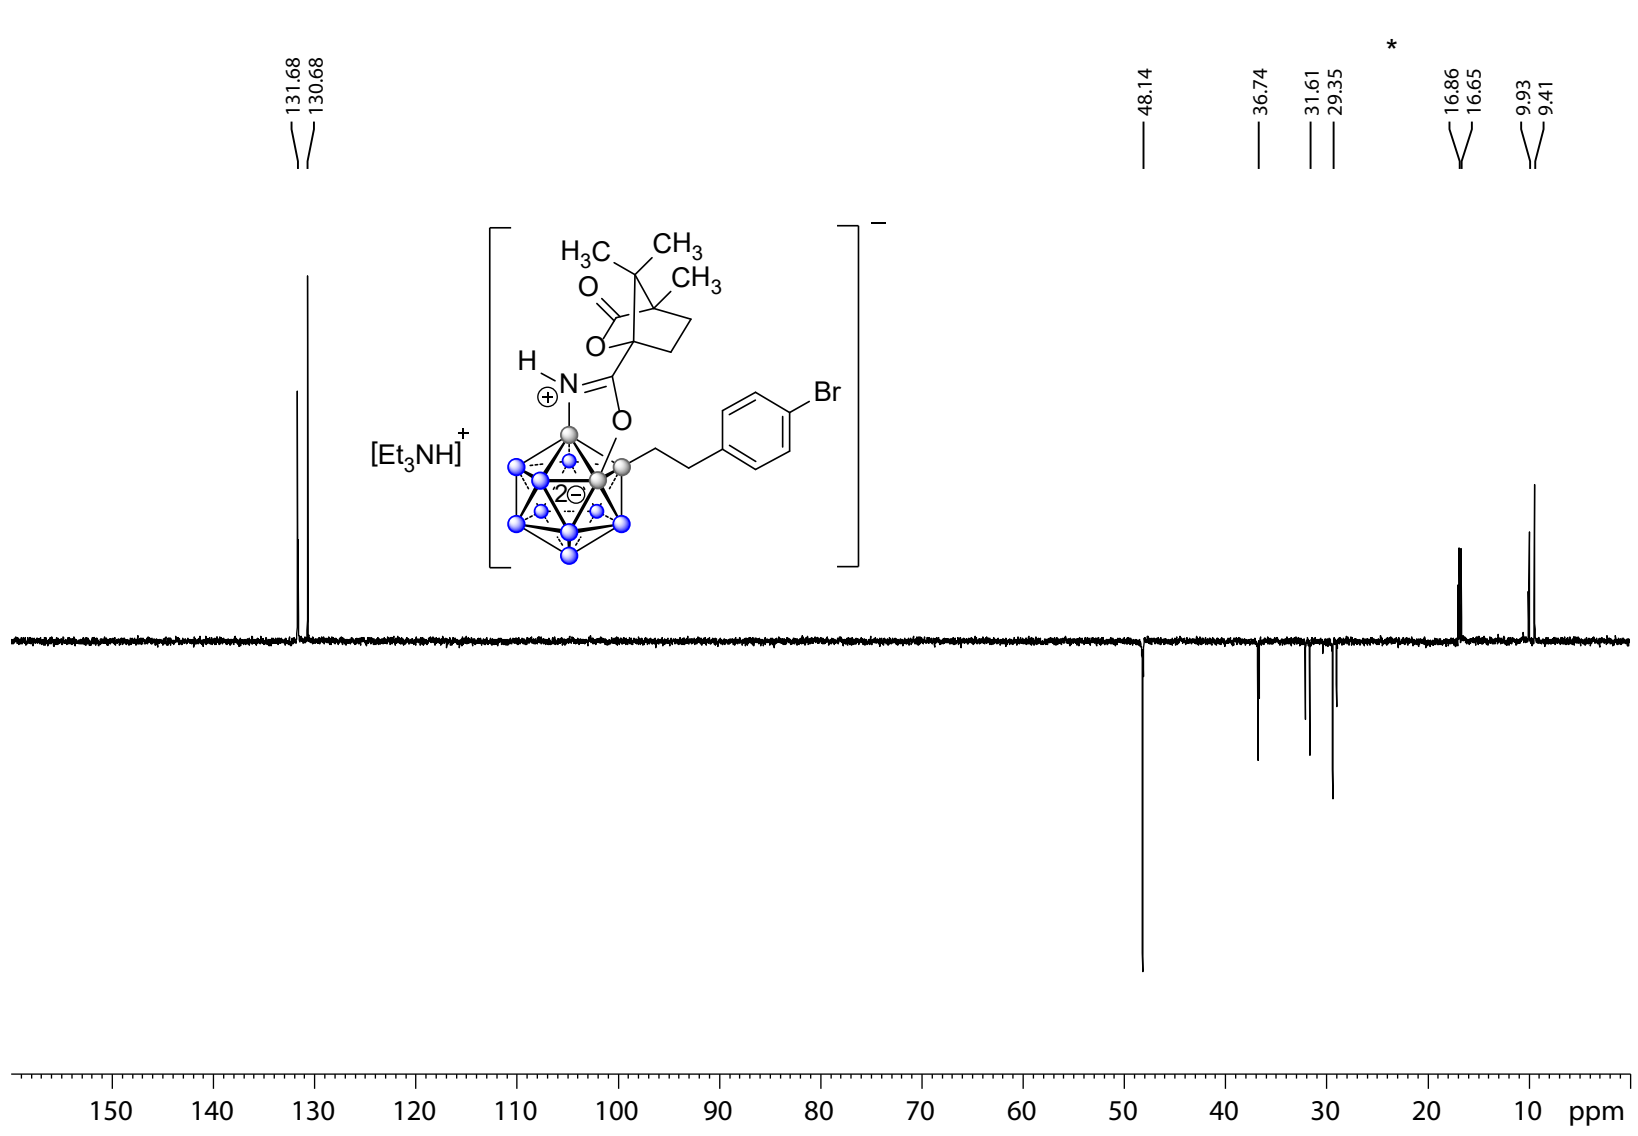

Current Data Parameters  
 NAME 20191014-RV-B12C-4BrStyr  
 EXPNO 6  
 PROCNO 1

F2 - Acquisition Parameters  
 Date\_ 20191014  
 Time\_ 11.35  
 INSTRUM spect  
 PROBHD 5 mm PABBO BB/  
 PULPROG dept135  
 TD 65536  
 SOLVENT Acetone  
 NS 512  
 DS 4  
 SWH 29296.875 Hz  
 FIDRES 0.447035 Hz  
 AQ 1.1184810 sec  
 RG 193.34  
 DW 17.067 usec  
 DE 6.50 usec  
 TE 296.4 K  
 CNST2 145.0000000  
 D1 2.0000000 sec  
 D2 0.00344828 sec  
 D12 0.00002000 sec  
 TD0 1

===== CHANNEL f1 =====  
 NUC1 13C  
 P1 10.00 usec  
 P2 20.00 usec  
 PLW1 53.00000000 W  
 SFO1 100.6228293 MHz

===== CHANNEL f2 =====  
 CPDPRG[2] waltz16  
 NUC2 1H  
 P3 15.00 usec  
 P4 30.00 usec  
 PCPD2 80.00 usec  
 PLW2 12.50000000 W  
 PLW12 0.43945000 W  
 SFO2 400.1316005 MHz

F2 - Processing parameters  
 SI 32768  
 SF 100.6126838 MHz  
 WDW EM  
 SSB 0  
 LB 1.00 Hz  
 GB 0  
 PC 4.00

<sup>1</sup>H - <sup>1</sup>H COSY NMR

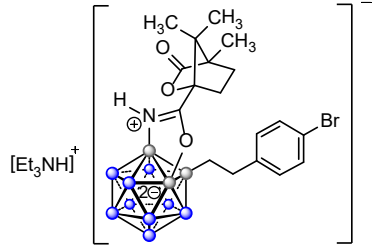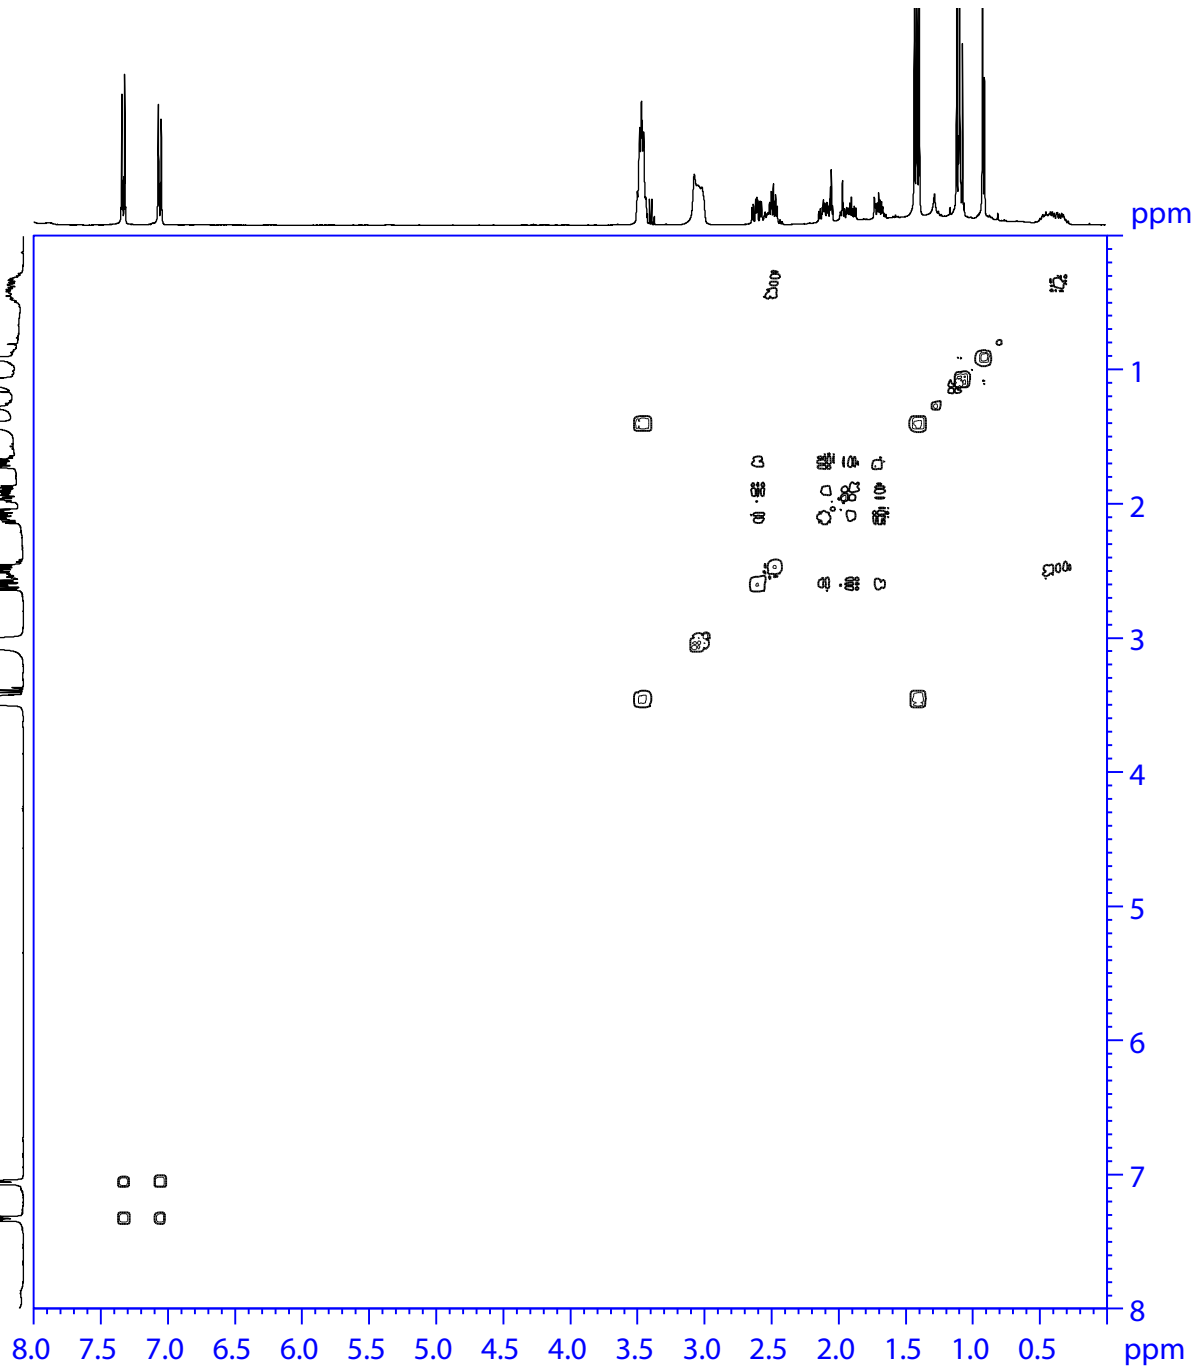

Current Data Parameters  
 NAME 20191014-RV-B12C-4BrStyr  
 EXPNO 8  
 PROCNO 1

F2 - Acquisition Parameters  
 Date\_ 20191014  
 Time\_ 11.52  
 INSTRUM spect  
 PROBHD 5 mm PABBO BB/  
 PULPROG cosygpppqf  
 TD 2048  
 SOLVENT Acetone  
 NS 2  
 DS 8  
 SWH 5341.880 Hz  
 FIDRES 2.608340 Hz  
 AQ 0.1916928 sec  
 RG 124.48  
 DW 93.600 usec  
 DE 6.50 usec  
 TE 295.9 K  
 D0 0.0000300 sec  
 D1 2.0000000 sec  
 D11 0.0300000 sec  
 D12 0.0000200 sec  
 D13 0.0000400 sec  
 D16 0.0002000 sec  
 INO 0.00018720 sec

===== CHANNEL f1 =====  
 NUC1 1H  
 P0 15.00 usec  
 P1 15.00 usec  
 P17 2500.00 usec  
 PLW1 12.5000000 W  
 PLW10 4.16050005 W  
 SFO1 400.1324057 MHz

===== GRADIENT CHANNEL =====  
 GPNAM[1] SMSQ10.100  
 GPZ1 10.00 %  
 P16 1000.00 usec

F1 - Acquisition parameters  
 TD 128  
 SFO1 400.1324 MHz  
 FIDRES 83.466881 Hz  
 SW 13.350 ppm  
 FhMODE QF

F2 - Processing parameters  
 SI 1024  
 SF 400.1300100 MHz  
 WDW QSINE  
 SSB 0  
 LB 0 Hz  
 GB 0  
 PC 1.40

F1 - Processing parameters  
 SI 1024  
 MC2 QF  
 SF 400.1300094 MHz  
 WDW QSINE  
 SSB 0  
 LB 0 Hz  
 GB 0



<sup>1</sup>H - <sup>13</sup>C HSQC NMR

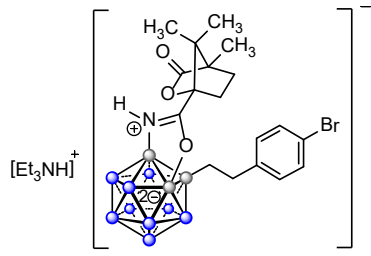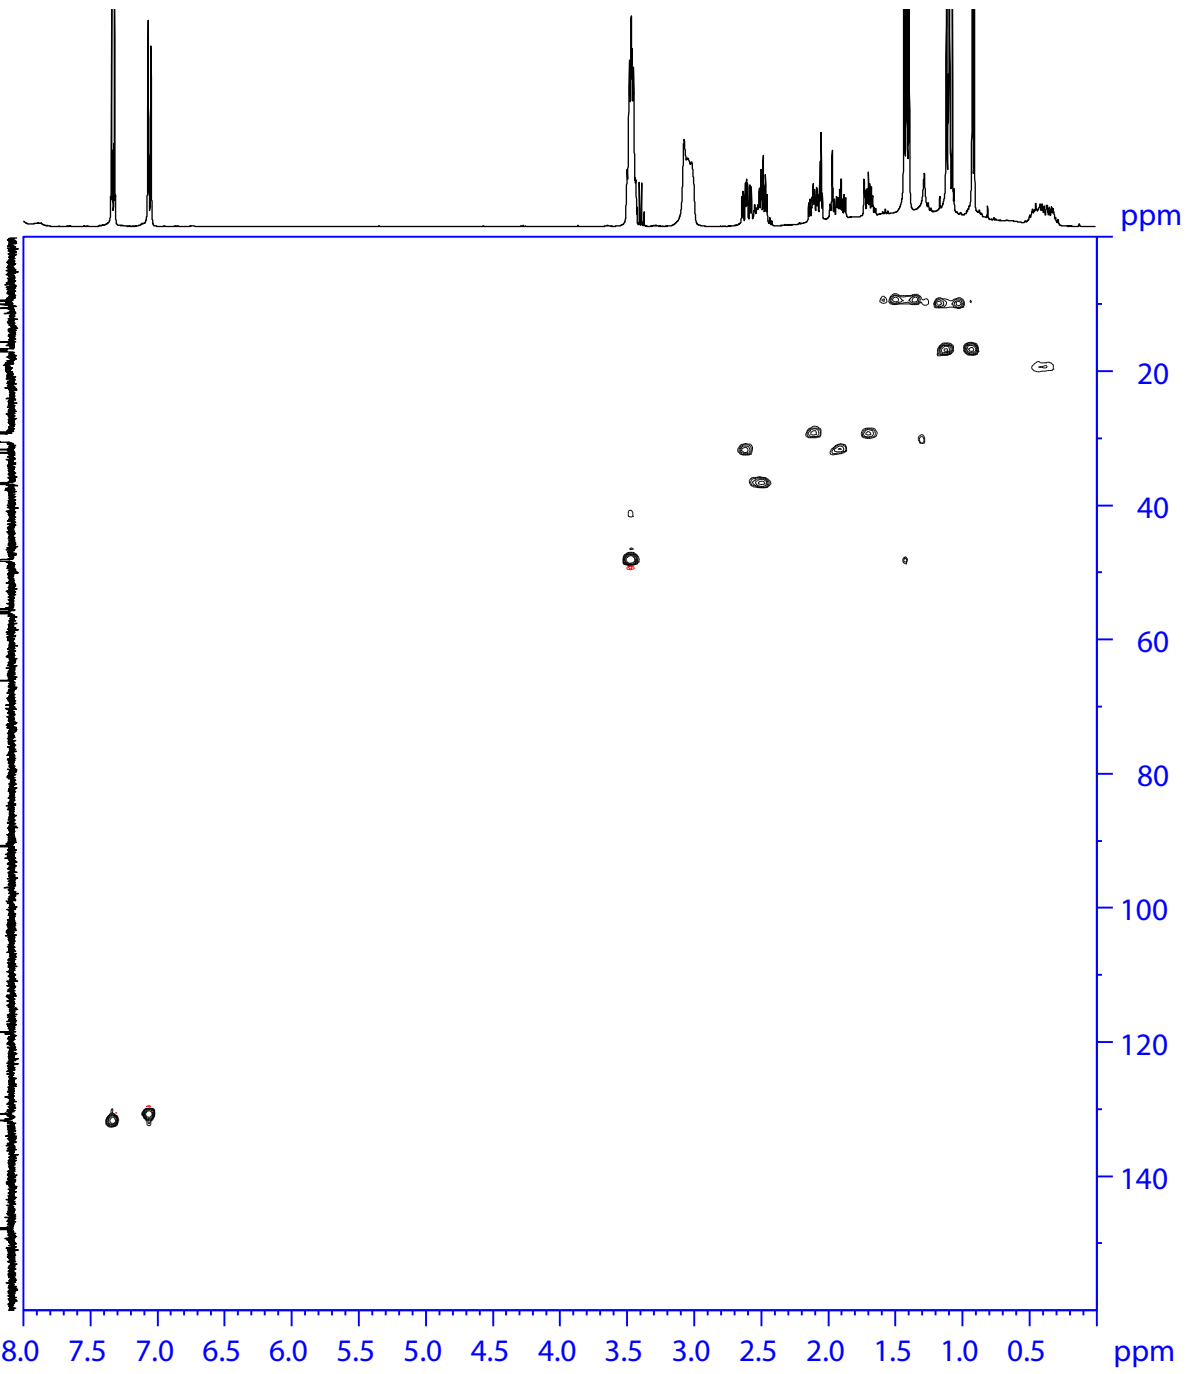

```

Current Data Parameters
NAME      20191014-RV-B12C-4BrStyr
EXPNO    7
PROCNO   1

F2 - Acquisition Parameters
Date_    20191014
Time     11.37
INSTRUM  spect
PROBHD   5 mm PABBO BB/
PULPROG  hsqcetgps12
TD       1024
SOLVENT  Acetone
NS       2
DS       16
SWH      6009.615 Hz
FIDRES   5.868765 Hz
AQ       0.0851968 sec
RG       193.34
DW       83.200 usec
DE       6.50 usec
TE       296.2 K
CNST2    145.0000000
D0       0.0000300 sec
D1       1.50000000 sec
D4       0.00172414 sec
D11      0.03000000 sec
D16      0.00020000 sec
D24      0.00086207 sec
IN0      0.00001990 sec
ZGOPTNS

===== CHANNEL f1 =====
NUC1     1H
P1       15.00 usec
P2       30.00 usec
P28      1000.00 usec
PLW1     12.50000000 W
SFO1     400.1328009 MHz

===== CHANNEL f2 =====
CPDPRG2  gaxp
NUC2     13C
P3       10.00 usec
P4       20.00 usec
PCPD2    70.00 usec
PLW2     53.00000000 W
PLW12    1.08159995 W
SFO2     100.6238364 MHz

===== GRADIENT CHANNEL =====
GPNAM[1] SMSQ10.100
GPNAM[2] SMSQ10.100
GPNAM[3] SMSQ10.100
GPNAM[4] SMSQ10.100
GPZ1     80.00 %
GPZ2     20.10 %
GPZ3     11.00 %
GPZ4     -5.00 %
P16      1000.00 usec
P19      600.00 usec

F1 - Acquisition parameters
TD       256
SFO1     100.6238 MHz
FIDRES   196.524048 Hz
SW       249.991 ppm
FhMODE   Echo-Antiecho

F2 - Processing parameters
SI       1024
SF       400.1300024 MHz
WDW      QSINE
SSB      2
LB       0 Hz
GB       0
PC       1.40

F1 - Processing parameters
SI       1024
MC2      echo-antiecho
SF       100.6126691 MHz
WDW      QSINE
SSB      2
LB       0 Hz
GB       0
    
```

20191020-B12C-OMeStyr 20 mg white solid  $[\text{Et}_3\text{NH}][\text{B}_{12}\text{H}_{10}\text{NHCO}(\text{Camphanic})\text{CH}_2\text{CH}_2\text{C}_6\text{H}_4\text{-4OMe}]$  dissolved in 0.6 mL acetone- $d_6^*$

400MHz  $^1\text{H}$  NMR,  $\circ$  deuterated solvent residual peak= 2.05 ppm;  $\diamond$  water peak

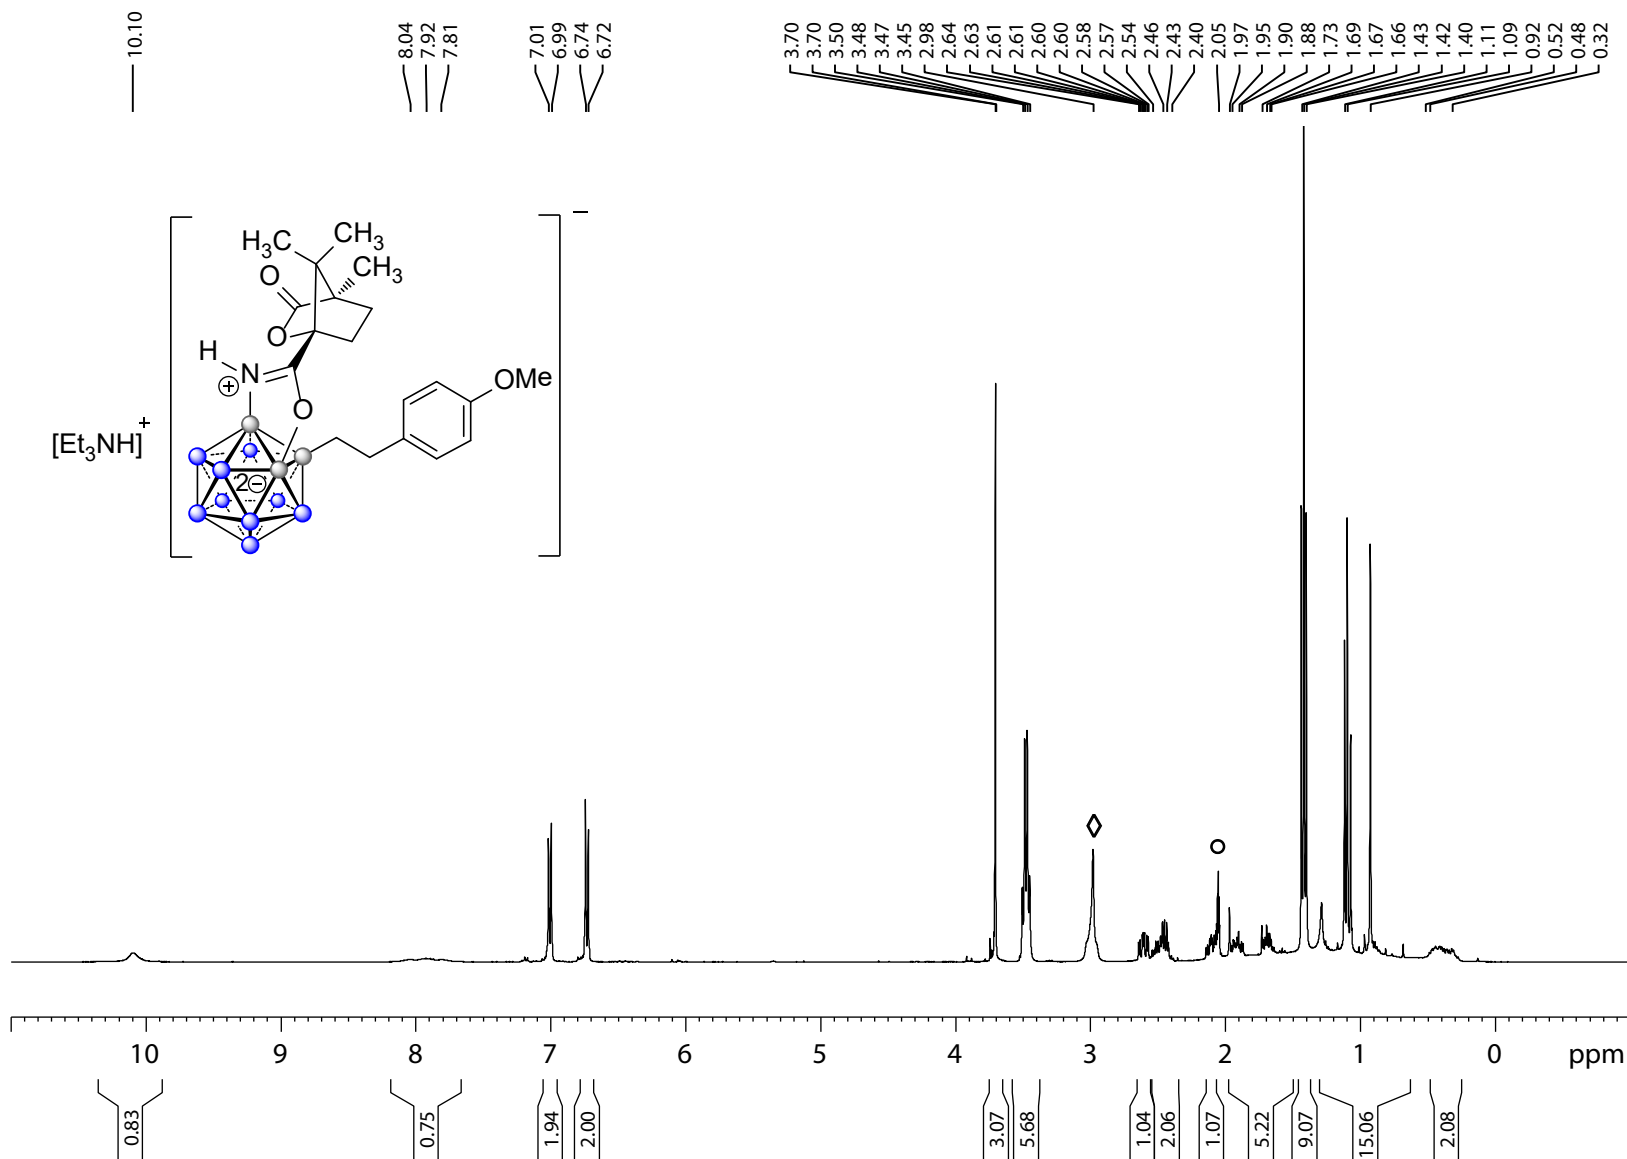

Current Data Parameters  
 NAME 20191020-RV-B12C-4OMeStyr  
 EXPNO 1  
 PROCNO 1

F2 - Acquisition Parameters  
 Date\_ 20191021  
 Time\_ 0.35  
 INSTRUM spect  
 PROBHD 5 mm PABBO BB/  
 PULPROG zg30  
 TD 65536  
 SOLVENT Acetone  
 NS 16  
 DS 2  
 SWH 10000.000 Hz  
 FIDRES 0.152588 Hz  
 AQ 3.2767999 sec  
 RG 78.69  
 DW 50.000 usec  
 DE 6.50 usec  
 TE 296.3 K  
 D1 1.00000000 sec  
 TD0 1

===== CHANNEL f1 =====  
 NUC1  $^1\text{H}$   
 P1 15.00 usec  
 PLW1 12.50000000 W  
 SFO1 400.1328009 MHz

F2 - Processing parameters  
 SI 65536  
 SF 400.1300071 MHz  
 WDW EM  
 SSB 0  
 LB 0.30 Hz  
 GB 0  
 PC 1.00

20191020-B12C-OMeStyr 20 mg white solid [Et<sub>3</sub>NH][B<sub>12</sub>H<sub>10</sub>NHCO(Camphanic)CH<sub>2</sub>CH<sub>2</sub>C<sub>6</sub>H<sub>4</sub>-4OMe] dissolved in 0.6 mL acetone-*d*<sub>6</sub>\*

400MHz <sup>1</sup>H{B} NMR, ◊ deuterated solvent residual peak = 2.05 ppm; ○ water peak

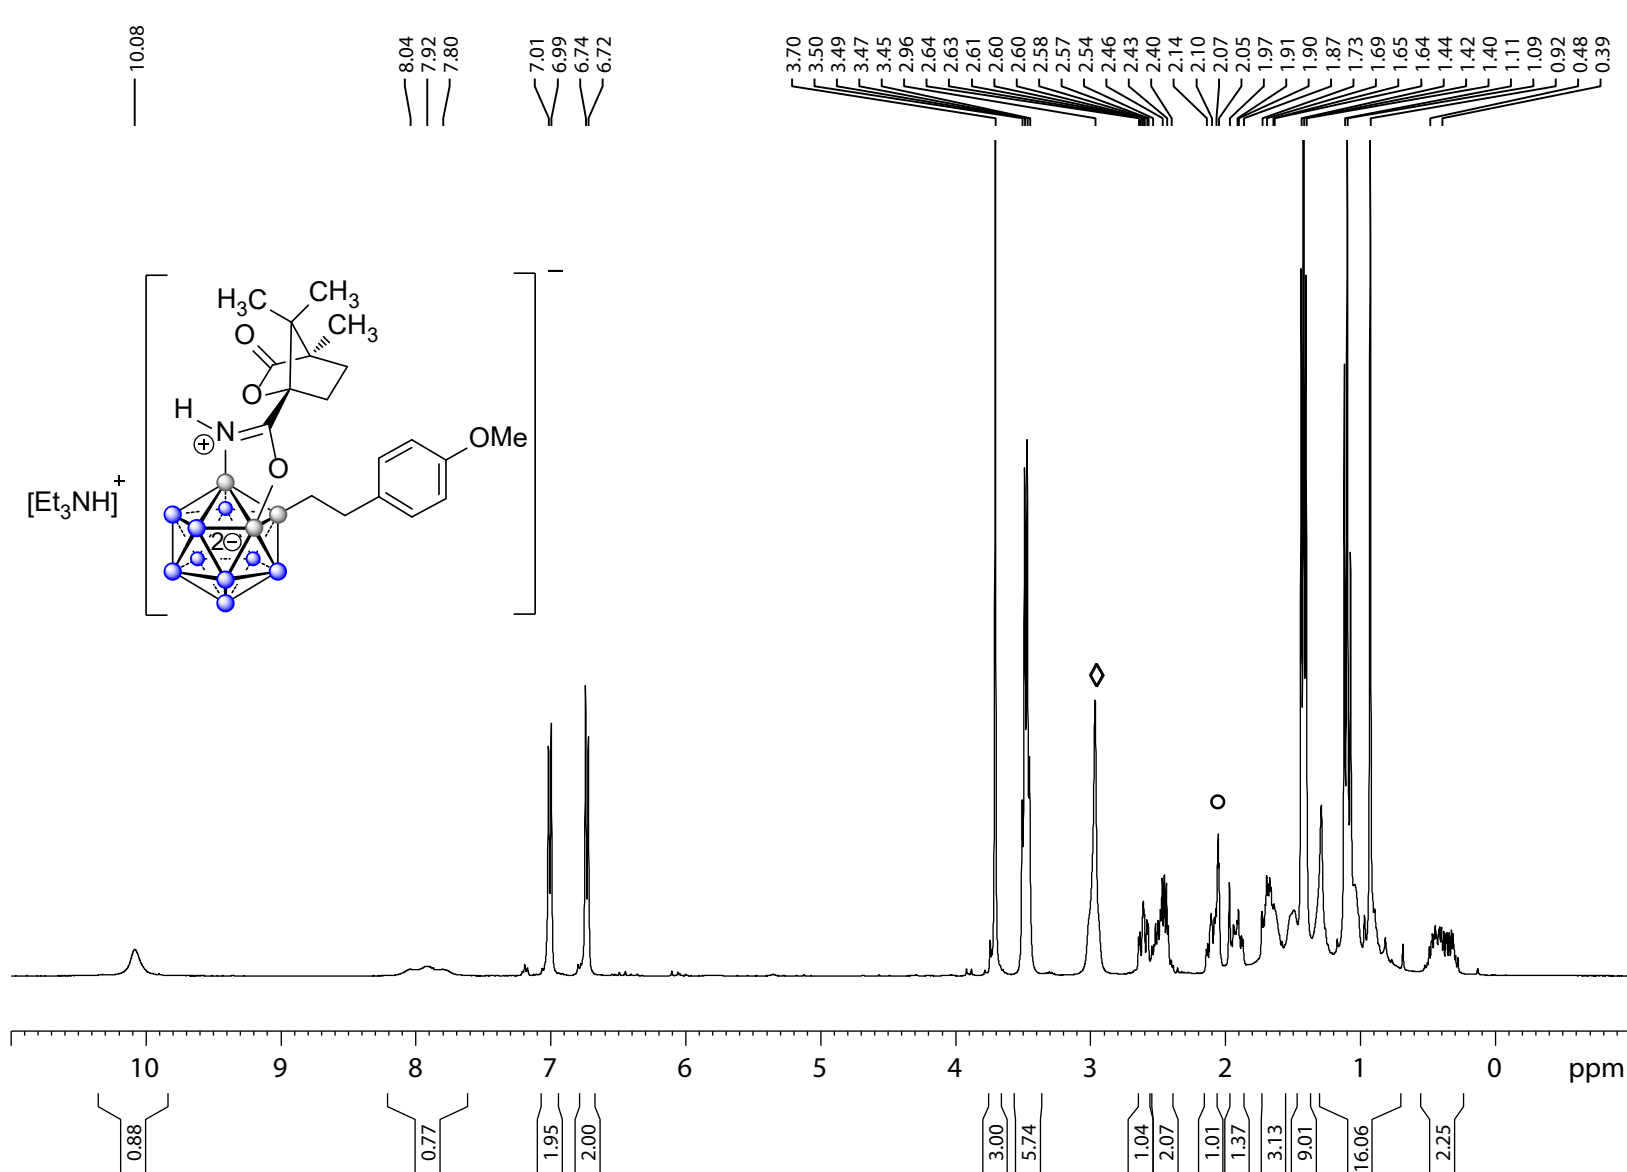

Current Data Parameters  
 NAME 20191020-RV-B12C-4OMeStyr  
 EXPNO 2  
 PROCNO 1

F2 - Acquisition Parameters  
 Date\_ 20191021  
 Time\_ 0.38  
 INSTRUM spect  
 PROBHD 5 mm PABBO BB/  
 PULPROG zgig30  
 TD 16384  
 SOLVENT Acetone  
 NS 16  
 DS 4  
 SWH 8012.820 Hz  
 FIDRES 0.489064 Hz  
 AQ 1.0223616 sec  
 RG 71.39  
 DW 62.400 usec  
 DE 6.50 usec  
 TE 296.6 K  
 D1 1.00000000 sec  
 D11 0.03000000 sec  
 TD0 1

===== CHANNEL f1 =====  
 NUC1 1H  
 P1 15.00 usec  
 PLW1 12.50000000 W  
 SFO1 400.1320007 MHz

===== CHANNEL f2 =====  
 CPDPRG[2] garp4  
 NUC2 11B  
 PCPD2 90.00 usec  
 PLW2 52.96599960 W  
 PLW12 0.64477998 W  
 SFO2 128.3776050 MHz

F2 - Processing parameters  
 SI 32768  
 SF 400.1300075 MHz  
 WDW EM  
 SSB 0  
 LB 1.00 Hz  
 GB 0  
 PC 1.40

20191020-B12C-OMeStyr 20 mg white solid [Et<sub>3</sub>NH][B<sub>12</sub>H<sub>10</sub>NHCO(Camphanic)CH<sub>2</sub>CH<sub>2</sub>C<sub>6</sub>H<sub>4</sub>-4OMe] dissolved in 0.6 mL acetone-*d*<sub>6</sub>\*

<sup>11</sup>B{<sup>1</sup>H} NMR 128 MHz

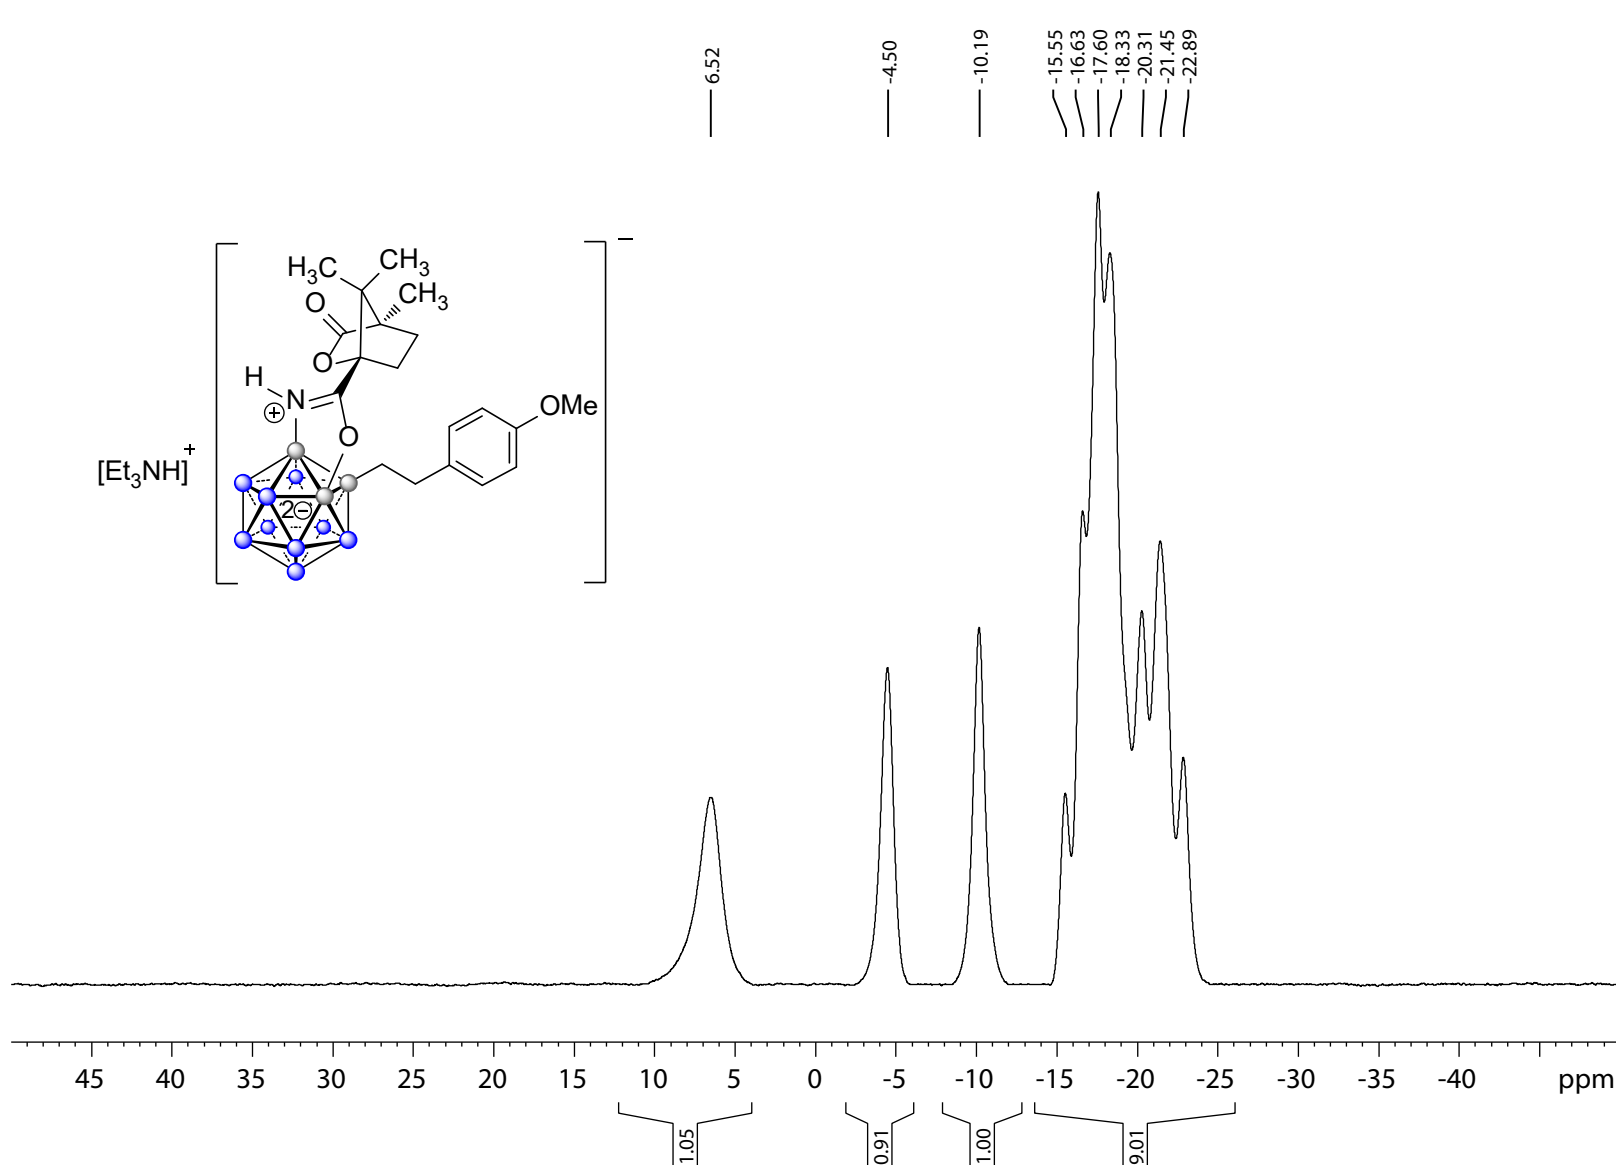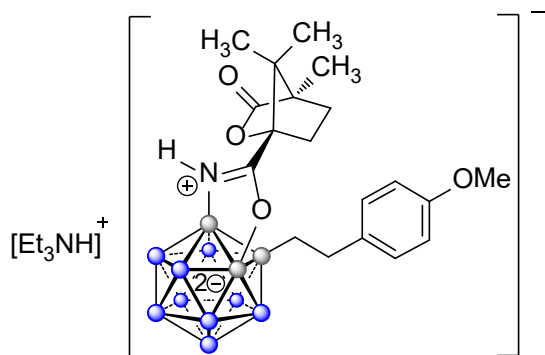

Current Data Parameters  
 NAME 20191020-RV-B12C-4OMeStyr  
 EXPNO 3  
 PROCNO 1

F2 - Acquisition Parameters  
 Date\_ 20191021  
 Time\_ 0.43  
 INSTRUM spect  
 PROBHD 5 mm PABBO BB/  
 PULPROG zg  
 TD 65536  
 SOLVENT Acetone  
 NS 128  
 DS 4  
 SWH 25510.203 Hz  
 FIDRES 0.389255 Hz  
 AQ 1.2845056 sec  
 RG 193.34  
 DW 19.600 usec  
 DE 6.50 usec  
 TE 296.6 K  
 D1 1.00000000 sec  
 TD0 1

===== CHANNEL f1 =====  
 NUC1 11B  
 P1 9.93 usec  
 PLW1 52.96599960 W  
 SFO1 128.3776052 MHz

F2 - Processing parameters  
 SI 32768  
 SF 128.3776050 MHz  
 WDW EM  
 SSB 0  
 LB 10.00 Hz  
 GB 0  
 PC 1.40

20191020-B12C-OMeStyr 20 mg white solid [Et<sub>3</sub>NH][B<sub>12</sub>H<sub>10</sub>NHCO(Camphanic)CH<sub>2</sub>CH<sub>2</sub>C<sub>6</sub>H<sub>4</sub>-4OMe] dissolved in 0.6 mL acetone-d<sub>6</sub>\*

<sup>11</sup>B{<sup>1</sup>H} NMR 128 MHz

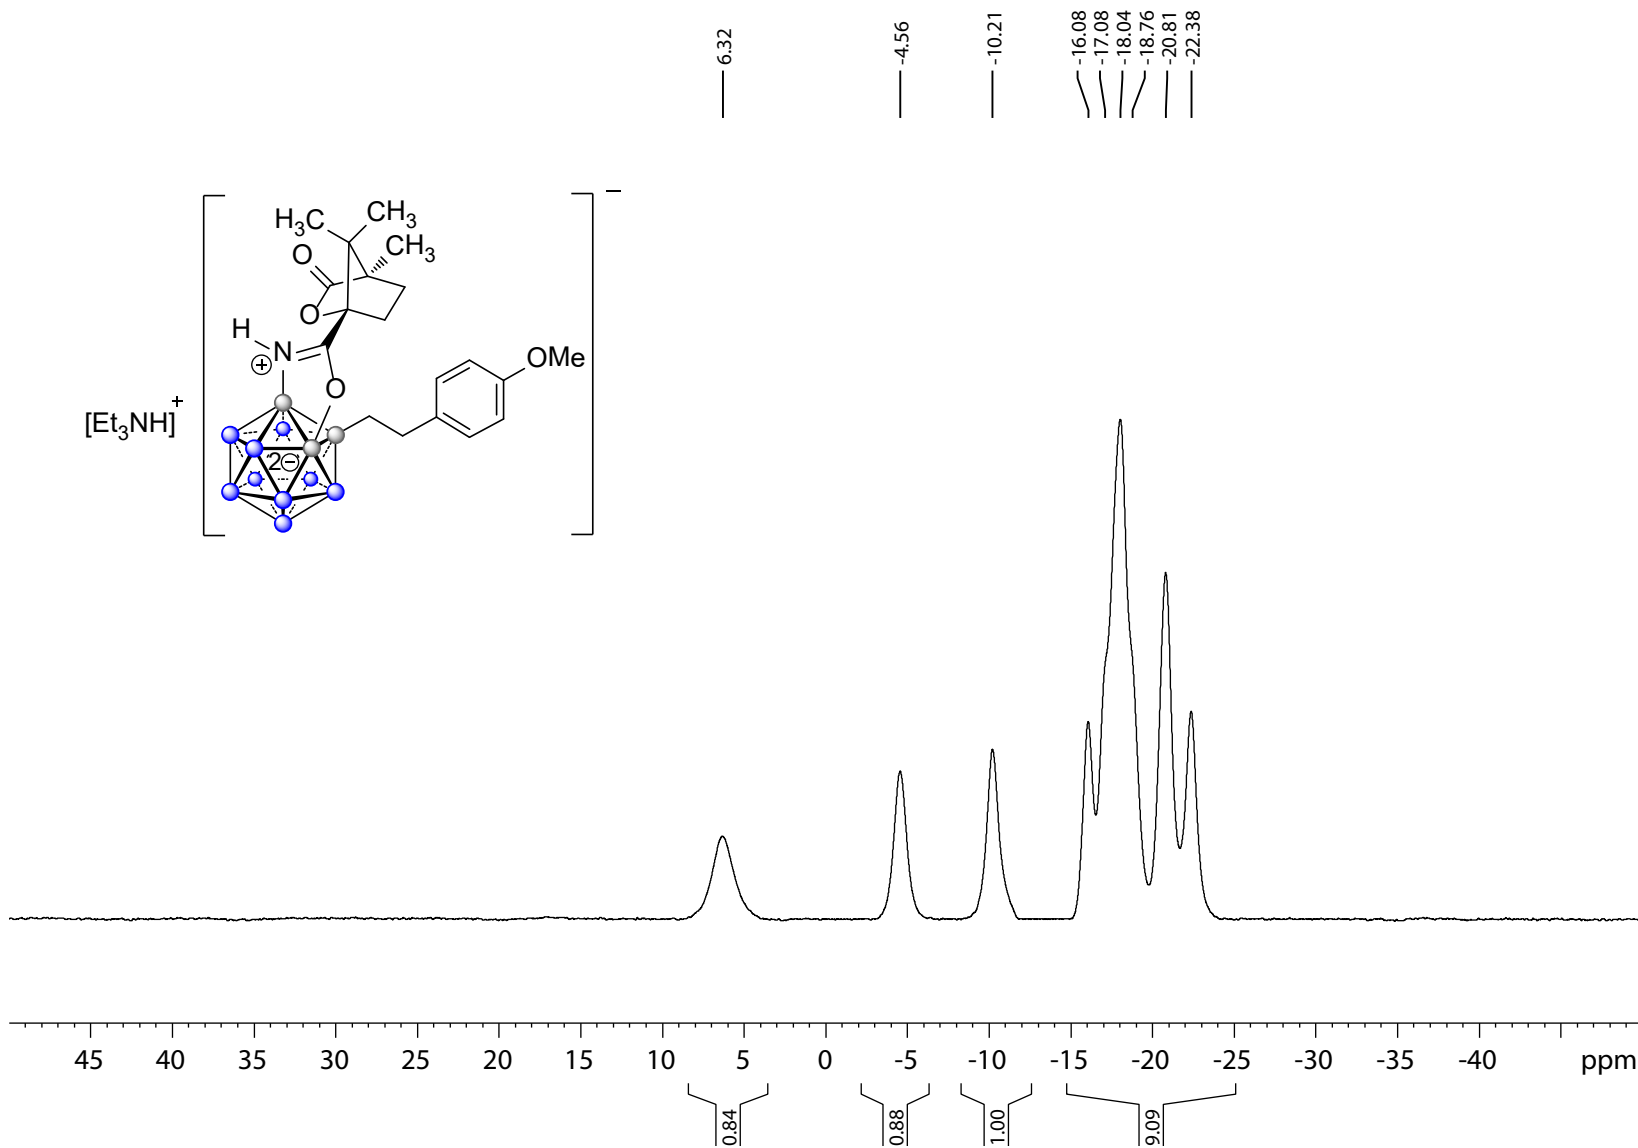

Current Data Parameters  
NAME 20191020-RV-B12C-4OMeStyr  
EXPNO 4  
PROCNO 1

F2 - Acquisition Parameters  
Date\_ 20191021  
Time\_ 0.49  
INSTRUM spect  
PROBHD 5 mm PABBO BB/  
PULPROG zgpg30  
TD 65536  
SOLVENT Acetone  
NS 128  
DS 4  
SWH 25510.203 Hz  
FIDRES 0.389255 Hz  
AQ 1.2845056 sec  
RG 193.34  
DW 19.600 usec  
DE 6.50 usec  
TE 297.5 K  
D1 1.00000000 sec  
D11 0.03000000 sec  
TD0 1

===== CHANNEL f1 =====  
NUC1 11B  
P1 9.93 usec  
PLW1 52.96599960 W  
SFO1 128.3776050 MHz

===== CHANNEL f2 =====  
CPDPRG[2] waltz16  
NUC2 1H  
PCPD2 80.00 usec  
PLW2 12.50000000 W  
PLW12 0.43945000 W  
PLW13 0.28125000 W  
SFO2 400.1320007 MHz

F2 - Processing parameters  
SI 32768  
SF 128.3776050 MHz  
WDW EM  
SSB 0  
LB 10.00 Hz  
GB 0  
PC 1.40

20191020-B12C-OMeStyr 20 mg white solid [Et<sub>3</sub>NH][B<sub>12</sub>H<sub>10</sub>NHCO(Camphanic)CH<sub>2</sub>CH<sub>2</sub>C<sub>6</sub>H<sub>4</sub>-4OMe] dissolved in 0.6 mL acetone-d<sub>6</sub>\*

<sup>13</sup>C{<sup>1</sup>H} NMR 100 MHz

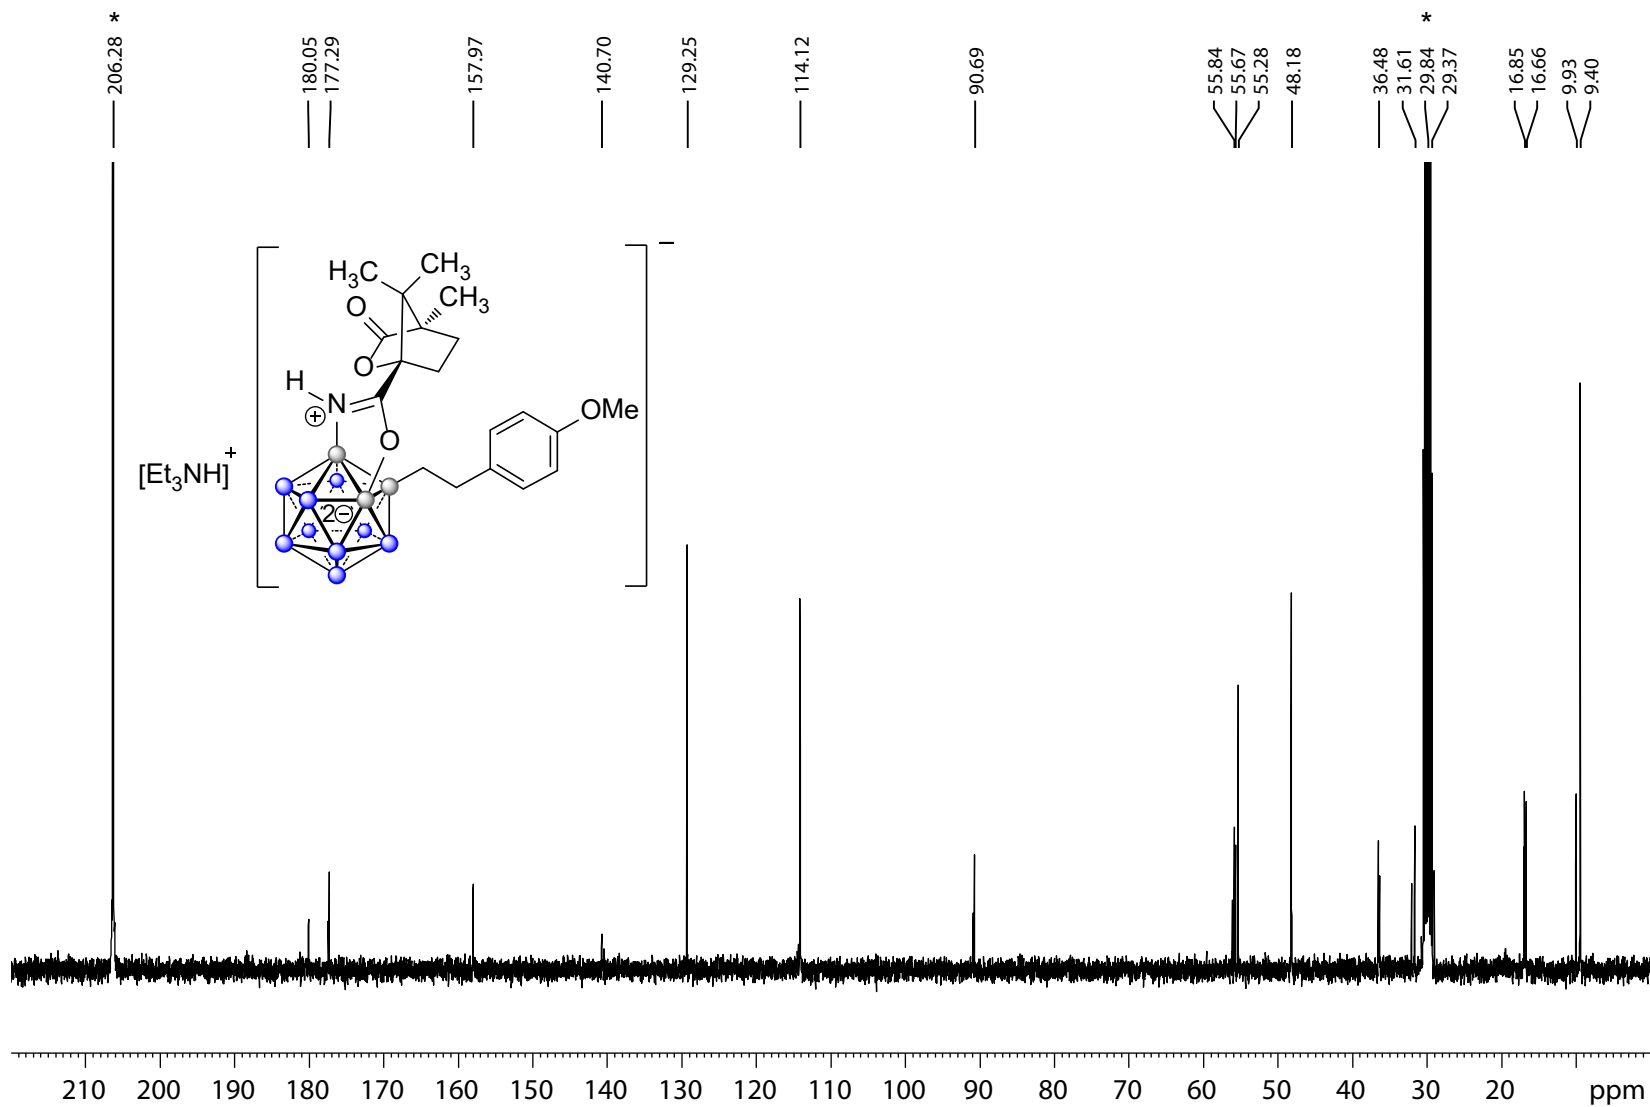

Current Data Parameters  
 NAME 20191020-RV-B12C-4OMeStyr  
 EXPNO 5  
 PROCNO 1

F2 - Acquisition Parameters  
 Date\_ 20191021  
 Time\_ 1.14  
 INSTRUM spect  
 PROBHD 5 mm PABBO BB/  
 PULPROG zgpg30  
 TD 65536  
 SOLVENT Acetone  
 NS 512  
 DS 4  
 SWH 29761.904 Hz  
 FIDRES 0.454131 Hz  
 AQ 1.1010048 sec  
 RG 193.34  
 DW 16.800 usec  
 DE 6.50 usec  
 TE 297.4 K  
 D1 1.50000000 sec  
 D11 0.03000000 sec  
 TD0 1

==== CHANNEL f1 =====  
 NUC1 13C  
 P1 10.00 usec  
 PLW1 53.0000000 W  
 SFO1 100.6228293 MHz

==== CHANNEL f2 =====  
 CPDPRG[2] waltz16  
 NUC2 1H  
 PCPD2 80.00 usec  
 PLW2 12.5000000 W  
 PLW12 0.43945000 W  
 PLW13 0.28125000 W  
 SFO2 400.1316005 MHz

F2 - Processing parameters  
 SI 32768  
 SF 100.6126832 MHz  
 WDW EM  
 SSB 0  
 LB 1.00 Hz  
 GB 0  
 PC 1.40

20191020-B12C-OMeStyr 20 mg white solid [Et<sub>3</sub>NH][B<sub>12</sub>H<sub>10</sub>NHCO(Camphanic)CH<sub>2</sub>CH<sub>2</sub>C<sub>6</sub>H<sub>4</sub>-4OMe] dissolved in 0.6 mL acetone-d<sub>6</sub>\*

<sup>13</sup>CDEPT NMR 100 MHz

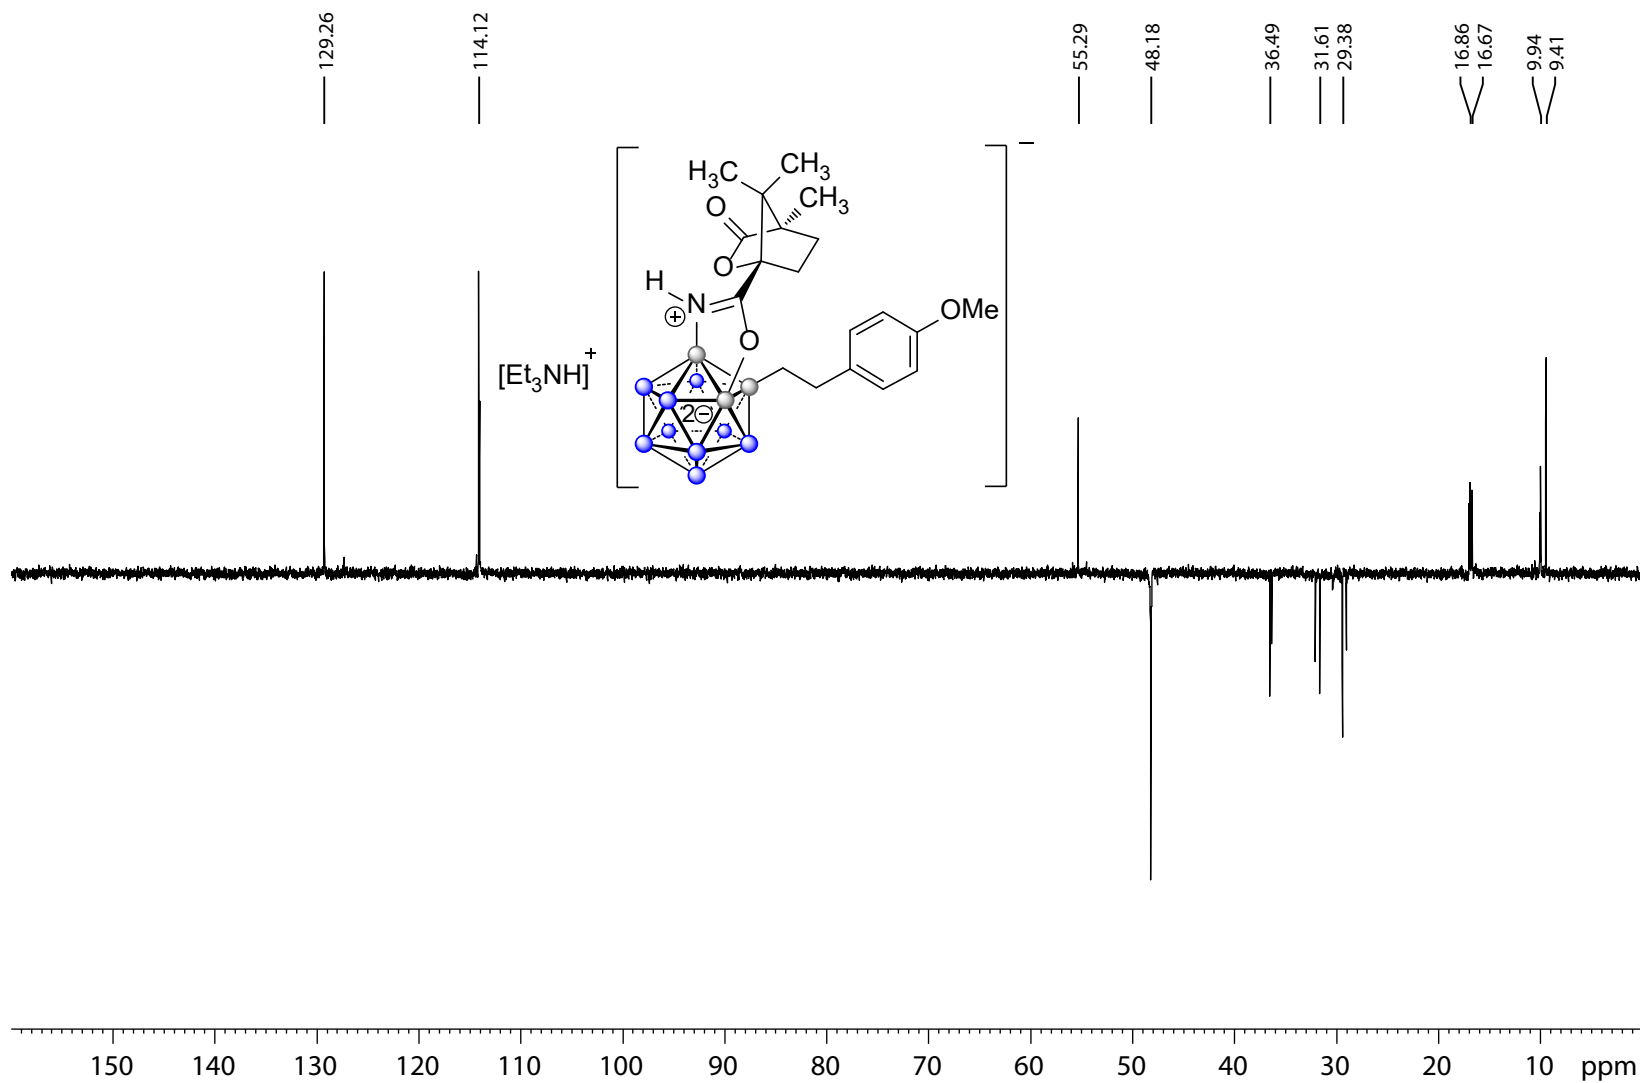

Current Data Parameters  
 NAME 20191020-RV-B12C-4OMeStyr  
 EXPNO 6  
 PROCNO 1

F2 - Acquisition Parameters  
 Date\_ 20191021  
 Time\_ 1.42  
 INSTRUM spect  
 PROBHD 5 mm PABBO BB/  
 PULPROG dept135  
 TD 65536  
 SOLVENT Acetone  
 NS 512  
 DS 4  
 SWH 29296.875 Hz  
 FIDRES 0.447035 Hz  
 AQ 1.1184810 sec  
 RG 193.34  
 DW 17.067 usec  
 DE 6.50 usec  
 TE 296.9 K  
 CNST2 145.0000000  
 D1 2.00000000 sec  
 D2 0.00344828 sec  
 D12 0.00002000 sec  
 TD0 1

===== CHANNEL f1 =====  
 NUC1 13C  
 P1 10.00 usec  
 P2 20.00 usec  
 PLW1 53.00000000 W  
 SFO1 100.6228293 MHz

===== CHANNEL f2 =====  
 CPDPRG[2] waltz16  
 NUC2 1H  
 P3 15.00 usec  
 P4 30.00 usec  
 PCPD2 80.00 usec  
 PLW2 12.50000000 W  
 PLW12 0.43945000 W  
 SFO2 400.1316005 MHz

F2 - Processing parameters  
 SI 32768  
 SF 100.6126823 MHz  
 WDW EM  
 SSB 0  
 LB 1.00 Hz  
 GB 0  
 PC 4.00

<sup>1</sup>H - <sup>1</sup>H COSY NMR

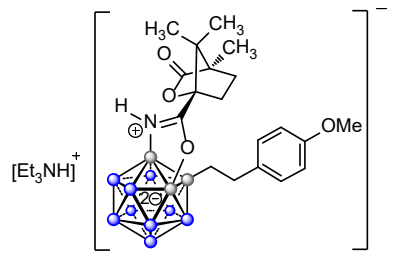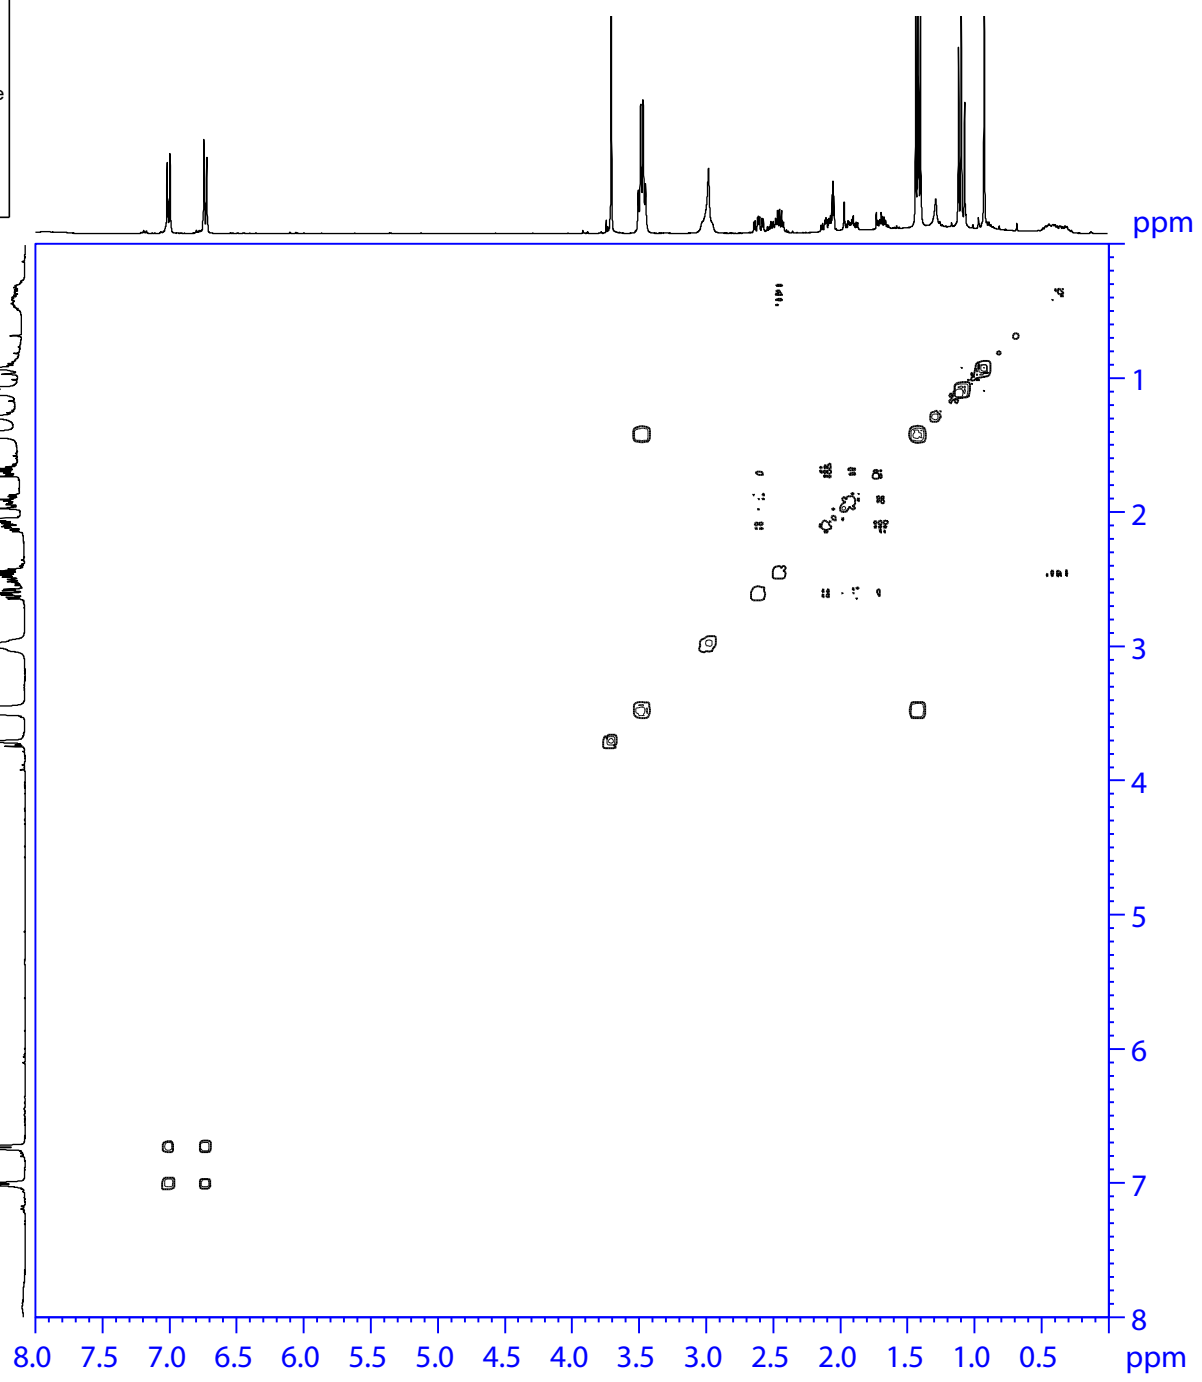

Current Data Parameters  
 NAME 20191020-RV-B12C-4OMeStyr  
 EXPNO 7  
 PROCNO 1

F2 - Acquisition Parameters  
 Date 20191021  
 Time 1.43  
 INSTRUM spect  
 PROBHD 5 mm PABBO BB/  
 PULPROG cosygpppqf  
 TD 2048  
 SOLVENT Acetone  
 NS 2  
 DS 8  
 SWH 5341.880 Hz  
 FIDRES 2.608340 Hz  
 AQ 0.1916928 sec  
 RG 152.18  
 DW 93.600 usec  
 DE 6.50 usec  
 TE 296.7 K  
 D0 0.0000300 sec  
 D1 2.0000000 sec  
 D11 0.0300000 sec  
 D12 0.0000200 sec  
 D13 0.0000040 sec  
 D16 0.0002000 sec  
 INO 0.00018720 sec

===== CHANNEL f1 =====  
 NUC1 1H  
 P0 15.00 usec  
 P1 15.00 usec  
 P17 2500.00 usec  
 PLW1 12.5000000 W  
 PLW10 4.16050005 W  
 SFO1 400.1324057 MHz

===== GRADIENT CHANNEL =====  
 GPNAM[1] SMSQ10.100  
 GPZ1 10.00 %  
 P16 1000.00 usec

F1 - Acquisition parameters  
 TD 128  
 SFO1 400.1324 MHz  
 FIDRES 83.466881 Hz  
 SW 13.350 ppm  
 FhMODE QF

F2 - Processing parameters  
 SI 1024  
 SF 400.1300082 MHz  
 WDW QSINE  
 SSB 0  
 LB 0 Hz  
 GB 0  
 PC 1.40

F1 - Processing parameters  
 SI 1024  
 MC2 QF  
 SF 400.1300071 MHz  
 WDW QSINE  
 SSB 0  
 LB 0 Hz  
 GB 0



<sup>1</sup>H - <sup>13</sup>C HSQC NMR

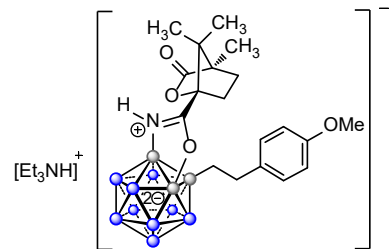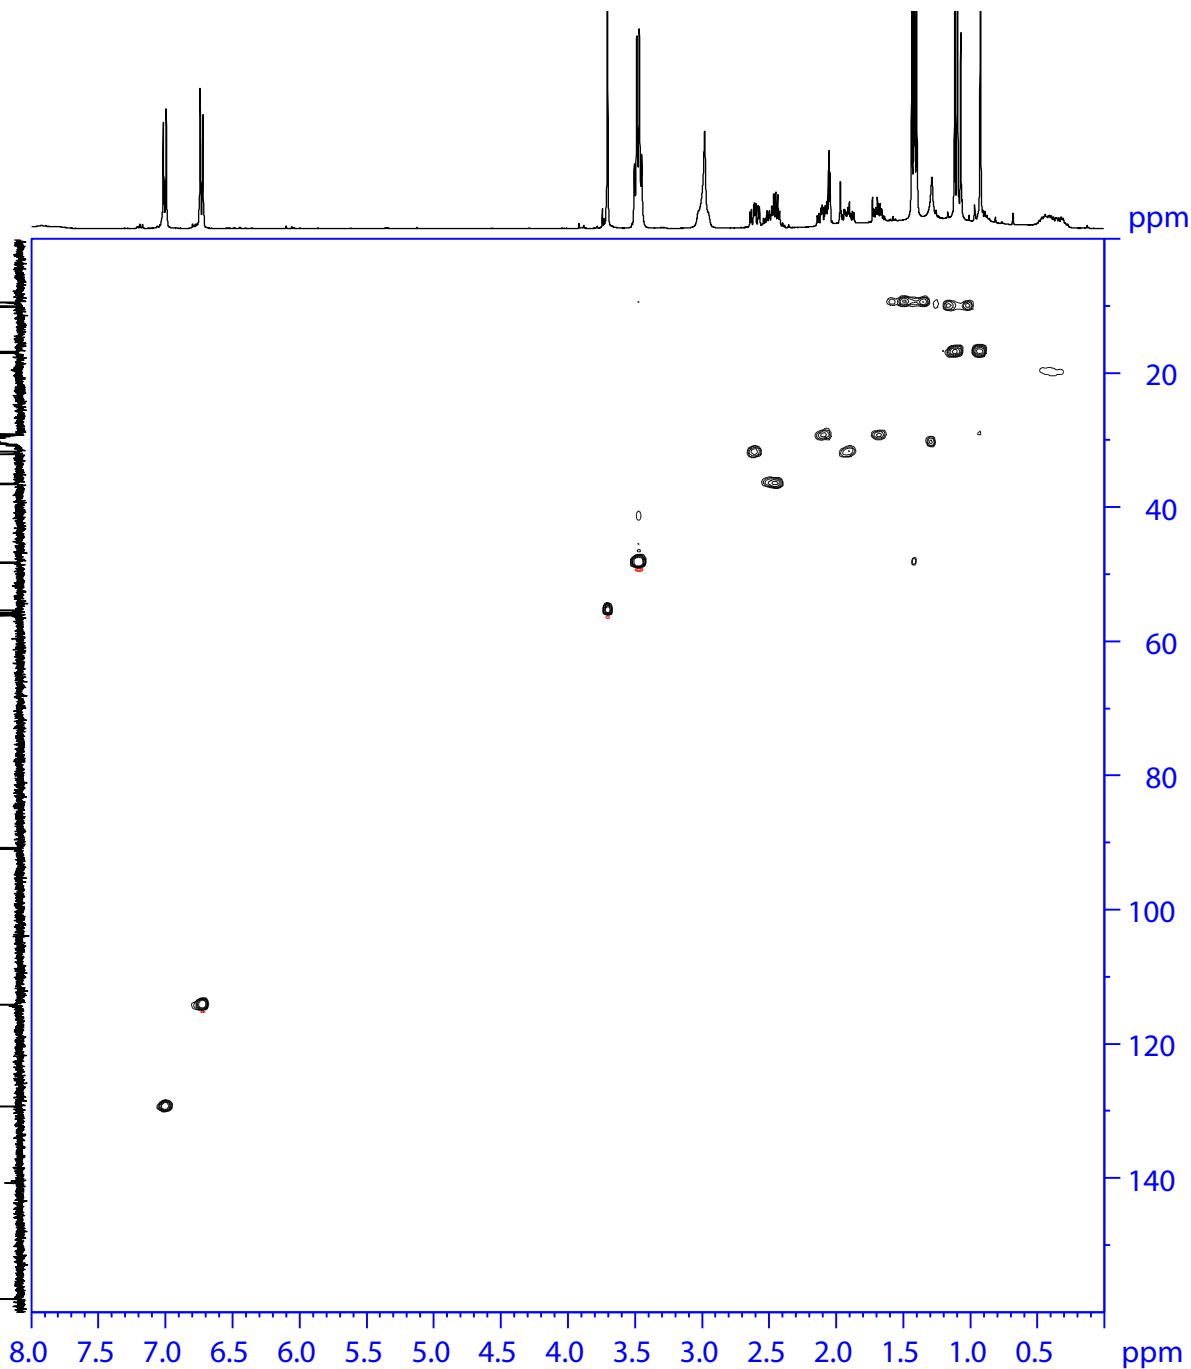

Current Data Parameters  
 NAME 20191020-RV-B12C-4OMeStyr  
 EXPNO 8  
 PROCNO 1

F2 - Acquisition Parameters  
 Date\_ 20191021  
 Time 1.54  
 INSTRUM spect  
 PROBHD 5 mm PABBO BB/  
 PULPROG hsqcetgps12  
 TD 1024  
 SOLVENT Acetone  
 NS 2  
 DS 16  
 SWH 6009.615 Hz  
 FIDRES 5.868765 Hz  
 AQ 0.0851968 sec  
 RG 193.34  
 DW 83.200 usec  
 DE 6.50 usec  
 TE 296.7 K  
 CNST2 145.0000000  
 D0 0.00000300 sec  
 D1 1.50000000 sec  
 D4 0.00172414 sec  
 D11 0.03000000 sec  
 D16 0.00020000 sec  
 D24 0.00086207 sec  
 INO 0.00001990 sec  
 ZGOPTNS

===== CHANNEL f1 =====  
 NUC1 1H  
 P1 15.00 usec  
 P2 30.00 usec  
 P28 1000.00 usec  
 PLW1 12.50000000 W  
 SFO1 400.1328009 MHz

===== CHANNEL f2 =====  
 CPDPRG2 garp  
 NUC2 13C  
 P3 10.00 usec  
 P4 20.00 usec  
 PCPD2 70.00 usec  
 PLW2 53.00000000 W  
 PLW12 1.08159995 W  
 SFO2 100.6238364 MHz

===== GRADIENT CHANNEL =====  
 GPNAM[1] SMSQ10.100  
 GPNAM[2] SMSQ10.100  
 GPNAM[3] SMSQ10.100  
 GPNAM[4] SMSQ10.100  
 GPZ1 80.00 %  
 GPZ2 20.10 %  
 GPZ3 11.00 %  
 GPZ4 -5.00 %  
 P16 1000.00 usec  
 P19 600.00 usec

F1 - Acquisition parameters  
 TD 256  
 SFO1 100.6238 MHz  
 FIDRES 196.524048 Hz  
 SW 249.991 ppm  
 FhMODE Echo-Antiecho

F2 - Processing parameters  
 SI 1024  
 SF 400.1300085 MHz  
 WDW QSINE  
 SSB 2  
 LB 0 Hz  
 GB 0  
 PC 1.40

F1 - Processing parameters  
 SI 1024  
 MC2 echo-antiecho  
 SF 100.6126714 MHz  
 WDW QSINE  
 SSB 2  
 LB 0 Hz  
 GB 0

20191020-B12C-NO2Styr 40 mg white solid  $[\text{Et}_3\text{NH}][\text{B}_{12}\text{H}_{10}\text{NHCO}(\text{Camphanic})\text{CH}_2\text{CH}_2\text{C}_6\text{H}_4\text{-4NO}_2]$  dissolved in 0.6 mL acetone- $d_6^*$   
 400MHz  $^1\text{H}$  NMR,  $\circ$  deuterated solvent residual peak= 2.05 ppm;  $\diamond$  water peak

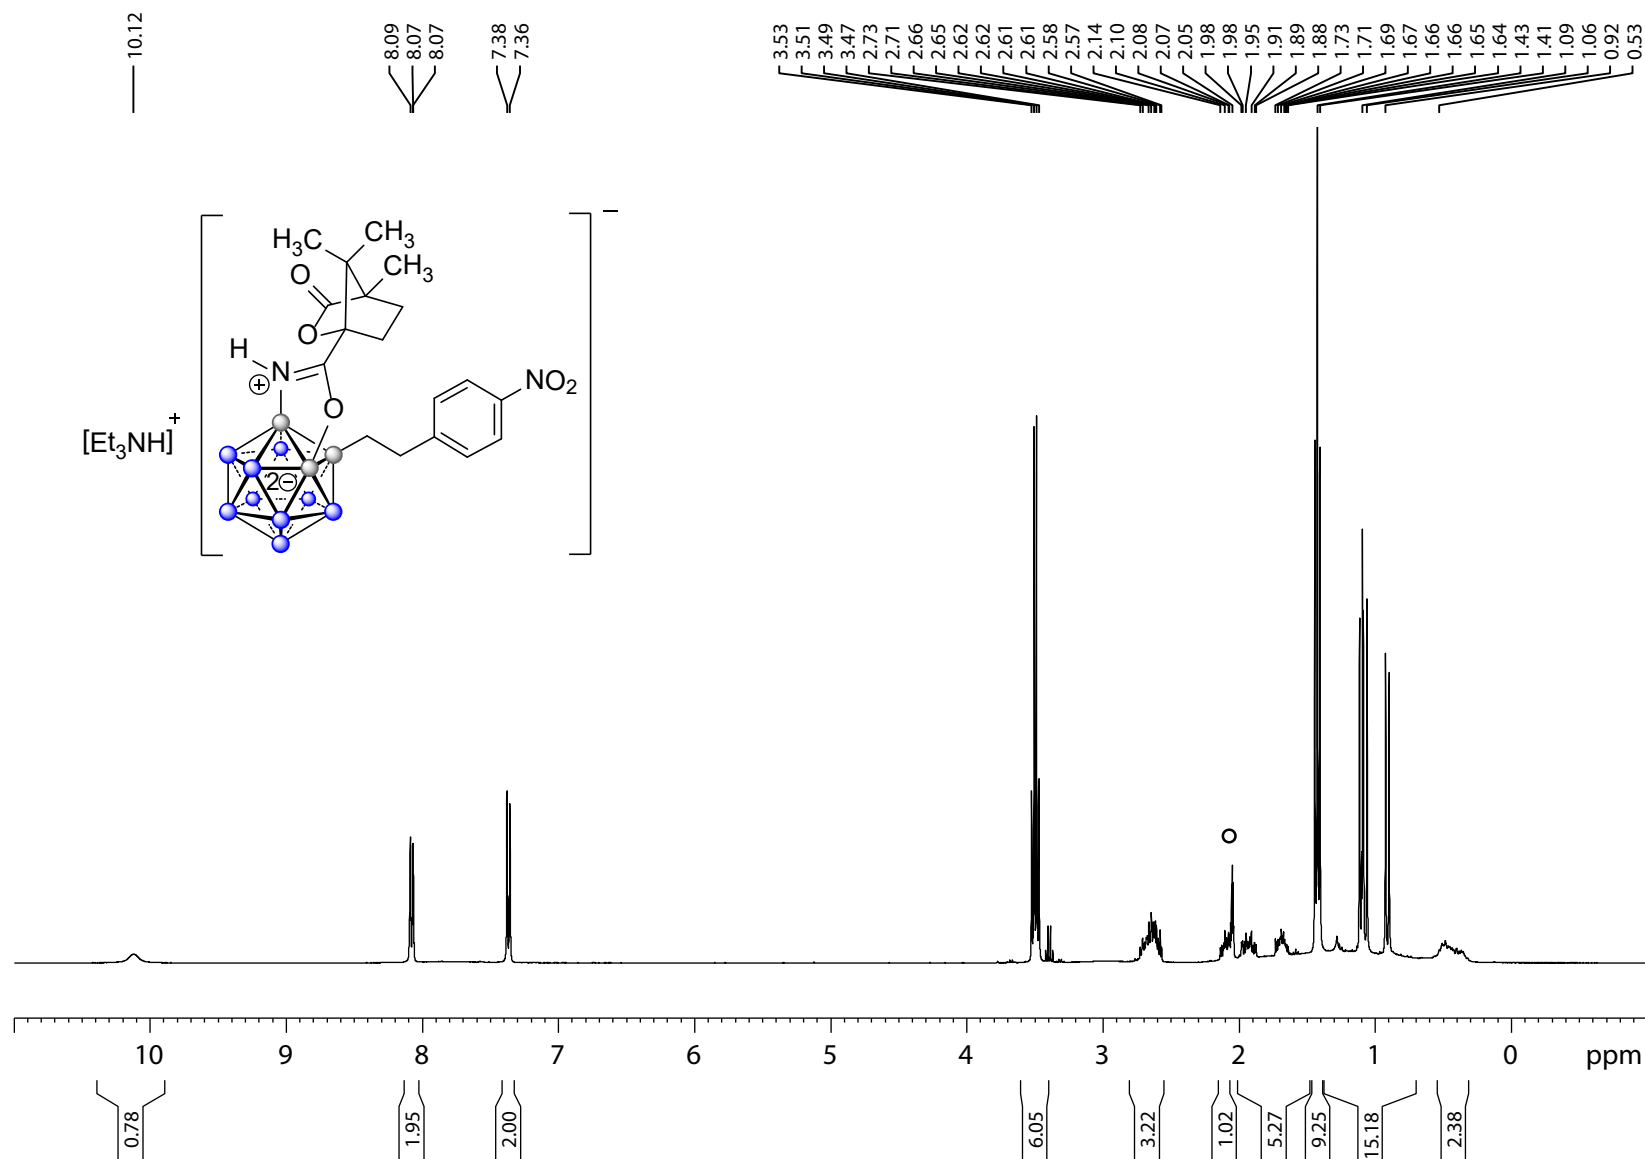

```

Current Data Parameters
NAME      20191024-RV-B12C-4NO2Styr
EXPNO    1
PROCNO   1

F2 - Acquisition Parameters
Date_    20191024
Time     14.36
INSTRUM  spect
PROBHD   5 mm PABBO BB/
PULPROG  zg30
TD       65536
SOLVENT  Acetone
NS       16
DS       2
SWH      10000.000 Hz
FIDRES   0.152588 Hz
AQ       3.2767999 sec
RG       86.58
DW       50.000 usec
DE       6.50 usec
TE       295.8 K
D1       1.00000000 sec
TD0      1

===== CHANNEL f1 =====
NUC1     1H
P1       15.00 usec
PLW1     12.50000000 W
SFO1     400.1328009 MHz

F2 - Processing parameters
SI       65536
SF       400.1300071 MHz
WDW      EM
SSB      0
LB       0.30 Hz
GB       0
PC       1.00
    
```

20191020-B12C-NO2Styr 40 mg white solid [Et<sub>3</sub>NH][B<sub>12</sub>H<sub>10</sub>NHCO(Camphanic)CH<sub>2</sub>CH<sub>2</sub>C<sub>6</sub>H<sub>4</sub>-4NO<sub>2</sub>] dissolved in 0.6 mL acetone-*d*<sub>6</sub>\*

400MHz <sup>1</sup>H{B} NMR, o deuterated solvent residual peak= 2.05 ppm; ◇ water peak

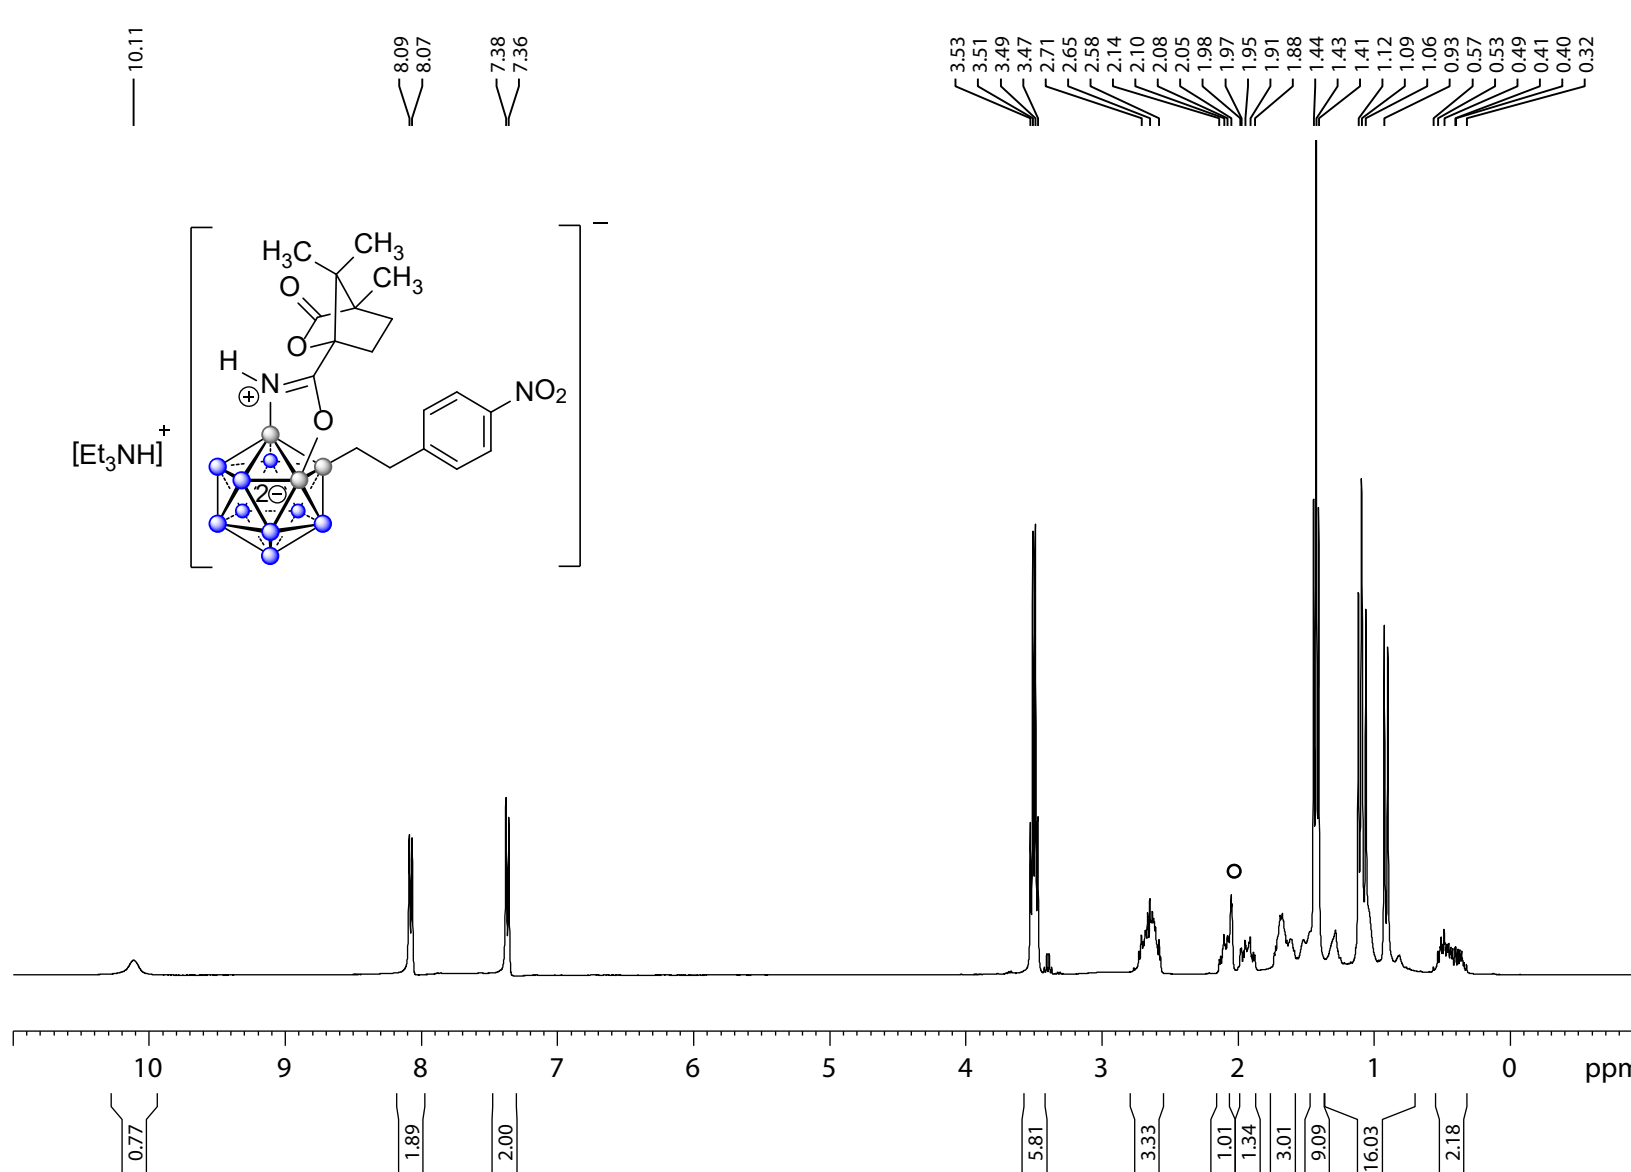

Current Data Parameters  
 NAME 20191024-RV-B12C-4NO2Styr  
 EXPNO 2  
 PROCNO 1

F2 - Acquisition Parameters  
 Date\_ 20191024  
 Time 14.38  
 INSTRUM spect  
 PROBHD 5 mm PABBO BB/  
 PULPROG zgig30  
 TD 16384  
 SOLVENT Acetone  
 NS 16  
 DS 4  
 SWH 8012.820 Hz  
 FIDRES 0.489064 Hz  
 AQ 1.0223616 sec  
 RG 86.58  
 DW 62.400 usec  
 DE 6.50 usec  
 TE 296.2 K  
 D1 1.00000000 sec  
 D11 0.03000000 sec  
 TDO 1

===== CHANNEL f1 =====  
 NUC1 1H  
 P1 15.00 usec  
 PLW1 12.50000000 W  
 SFO1 400.1320007 MHz

===== CHANNEL f2 =====  
 CPDPRG[2] garp4  
 NUC2 11B  
 PCPD2 90.00 usec  
 PLW2 52.96599960 W  
 PLW12 0.64477998 W  
 SFO2 128.3776050 MHz

F2 - Processing parameters  
 SI 32768  
 SF 400.1300075 MHz  
 WDW EM  
 SSB 0  
 LB 1.00 Hz  
 GB 0  
 PC 1.40

20191020-B12C-NO2Styr 40 mg white solid  $[\text{Et}_3\text{NH}][\text{B}_{12}\text{H}_{10}\text{NHCO}(\text{Camphanic})\text{CH}_2\text{CH}_2\text{C}_6\text{H}_4\text{-4NO}_2]$  dissolved in 0.6 mL acetone- $d_6^*$

$^{11}\text{B}\{\text{H}\}$  NMR 128 MHz

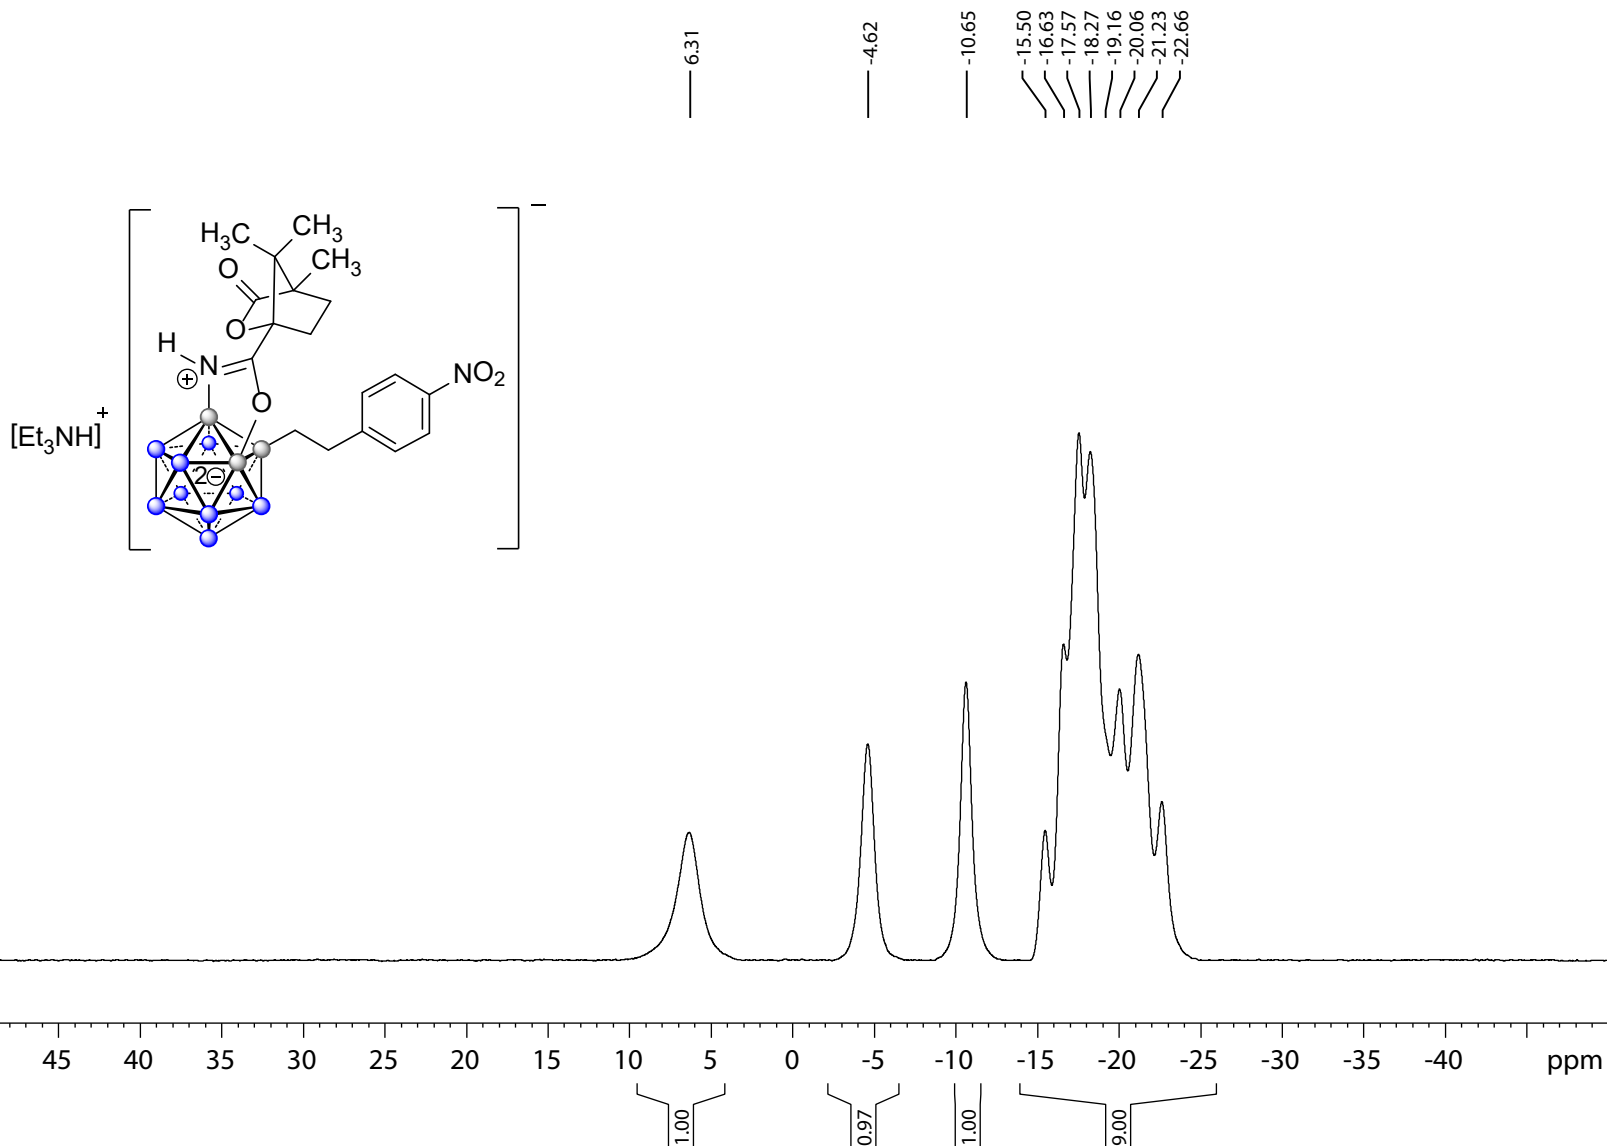

Current Data Parameters  
 NAME 20191024-RV-B12C-4NO2Styr  
 EXPNO 3  
 PROCNO 1

F2 - Acquisition Parameters  
 Date\_ 20191024  
 Time\_ 14.44  
 INSTRUM spect  
 PROBHD 5 mm PABBO BB/  
 PULPROG zg  
 TD 65536  
 SOLVENT Acetone  
 NS 128  
 DS 4  
 SWH 25510.203 Hz  
 FIDRES 0.389255 Hz  
 AQ 1.2845056 sec  
 RG 193.34  
 DW 19.600 usec  
 DE 6.50 usec  
 TE 296.2 K  
 D1 1.0000000 sec  
 TD0 1

===== CHANNEL f1 =====  
 NUC1 11B  
 P1 9.93 usec  
 PLW1 52.96599960 W  
 SFO1 128.3776052 MHz

F2 - Processing parameters  
 SI 32768  
 SF 128.3776050 MHz  
 WDW EM  
 SSB 0  
 LB 10.00 Hz  
 GB 0  
 PC 1.40

20191020-B12C-NO2Styr 40 mg white solid [Et<sub>3</sub>NH][B<sub>12</sub>H<sub>10</sub>NHCO(Camphanic)CH<sub>2</sub>CH<sub>2</sub>C<sub>6</sub>H<sub>4</sub>-4NO<sub>2</sub>] dissolved in 0.6 mL acetone-d<sub>6</sub>\*

<sup>11</sup>B{<sup>1</sup>H} NMR 128 MHz

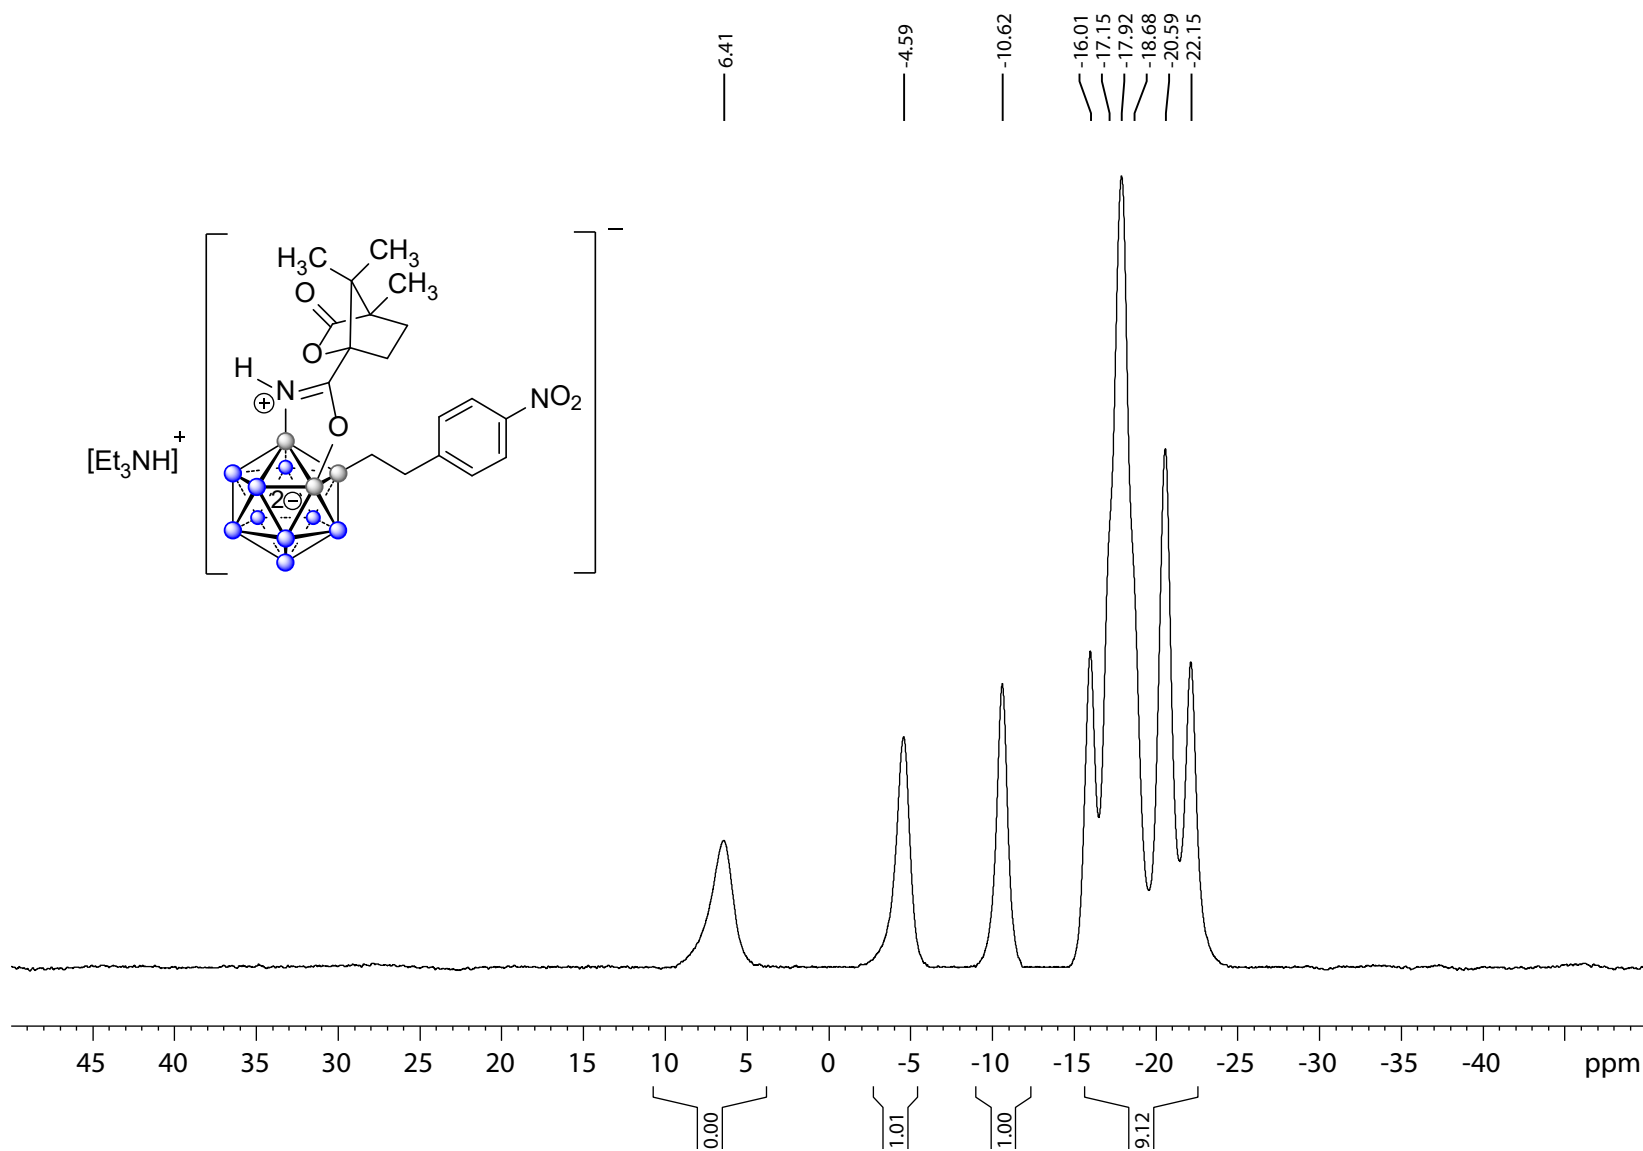

Current Data Parameters  
 NAME 20191024-RV-B12C-4NO2Styr  
 EXPNO 4  
 PROCNO 1

F2 - Acquisition Parameters  
 Date\_ 20191024  
 Time\_ 14.51  
 INSTRUM spect  
 PROBHD 5 mm PABBO BB/  
 PULPROG zgpg30  
 TD 65536  
 SOLVENT Acetone  
 NS 128  
 DS 4  
 SWH 25510.203 Hz  
 FIDRES 0.389255 Hz  
 AQ 1.2845056 sec  
 RG 193.34  
 DW 19.600 usec  
 DE 6.50 usec  
 TE 297.1 K  
 D1 1.0000000 sec  
 D11 0.0300000 sec  
 TD0 1

===== CHANNEL f1 =====  
 NUC1 11B  
 P1 9.93 usec  
 PLW1 52.96599960 W  
 SFO1 128.3776050 MHz

===== CHANNEL f2 =====  
 CPDPRG[2] waltz16  
 NUC2 1H  
 PCPD2 80.00 usec  
 PLW2 12.50000000 W  
 PLW12 0.43945000 W  
 PLW13 0.28125000 W  
 SFO2 400.1320007 MHz

F2 - Processing parameters  
 SI 32768  
 SF 128.3776050 MHz  
 WDW EM  
 SSB 0  
 LB 1.00 Hz  
 GB 0  
 PC 1.40

NMR-099

20191020-B12C-NO2Styr 40 mg white solid  $[\text{Et}_3\text{NH}][\text{B}_{12}\text{H}_{10}\text{NHCO}(\text{Camphanic})\text{CH}_2\text{CH}_2\text{C}_6\text{H}_4\text{-4NO}_2]$  dissolved in 0.6 mL acetone- $d_6^*$

$^{13}\text{C}\{^1\text{H}\}$  NMR 100 MHz

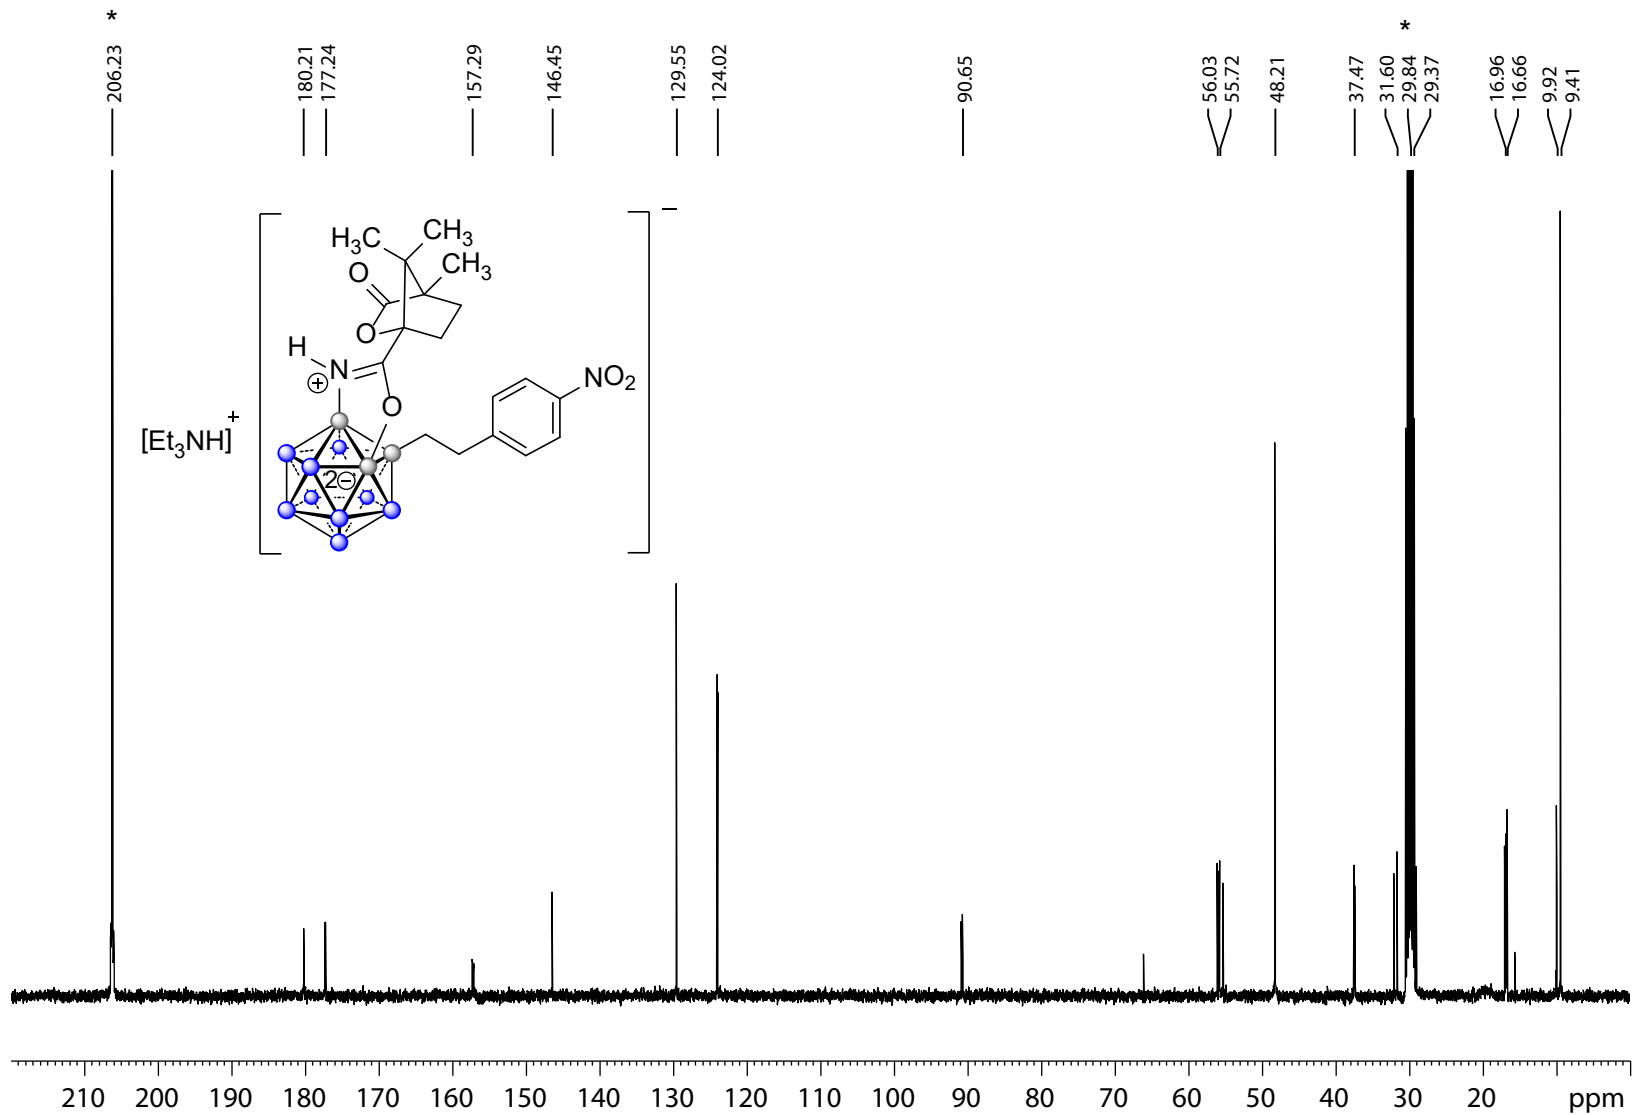

Current Data Parameters  
 NAME 20191024-RV-B12C-4NO2Styr  
 EXPNO 5  
 PROCNO 1

F2 - Acquisition Parameters  
 Date\_ 20191024  
 Time\_ 16.24  
 INSTRUM spect  
 PROBHD 5 mm PABBO BB/  
 PULPROG zgpg30  
 TD 65536  
 SOLVENT Acetone  
 NS 2048  
 DS 4  
 SWH 29761.904 Hz  
 FIDRES 0.454131 Hz  
 AQ 1.1010048 sec  
 RG 193.34  
 DW 16.800 usec  
 DE 6.50 usec  
 TE 296.5 K  
 D1 1.50000000 sec  
 D11 0.03000000 sec  
 TD0 1

==== CHANNEL f1 =====  
 NUC1 13C  
 P1 10.00 usec  
 PLW1 53.00000000 W  
 SFO1 100.6228293 MHz

==== CHANNEL f2 =====  
 CPDPRG[2] waltz16  
 NUC2 1H  
 PCPD2 80.00 usec  
 PLW2 12.50000000 W  
 PLW12 0.43945000 W  
 PLW13 0.28125000 W  
 SFO2 400.1316005 MHz

F2 - Processing parameters  
 SI 32768  
 SF 100.6126827 MHz  
 WDW EM  
 SSB 0  
 LB 1.00 Hz  
 GB 0  
 PC 1.40

20191020-B12C-NO2Styr 40 mg white solid [Et<sub>3</sub>NH][B<sub>12</sub>H<sub>10</sub>NHCO(Camphanic)CH<sub>2</sub>CH<sub>2</sub>C<sub>6</sub>H<sub>4</sub>-4NO<sub>2</sub>] dissolved in 0.6 mL acetone-d<sub>6</sub>\*

<sup>13</sup>CDEPT NMR 100 MHz

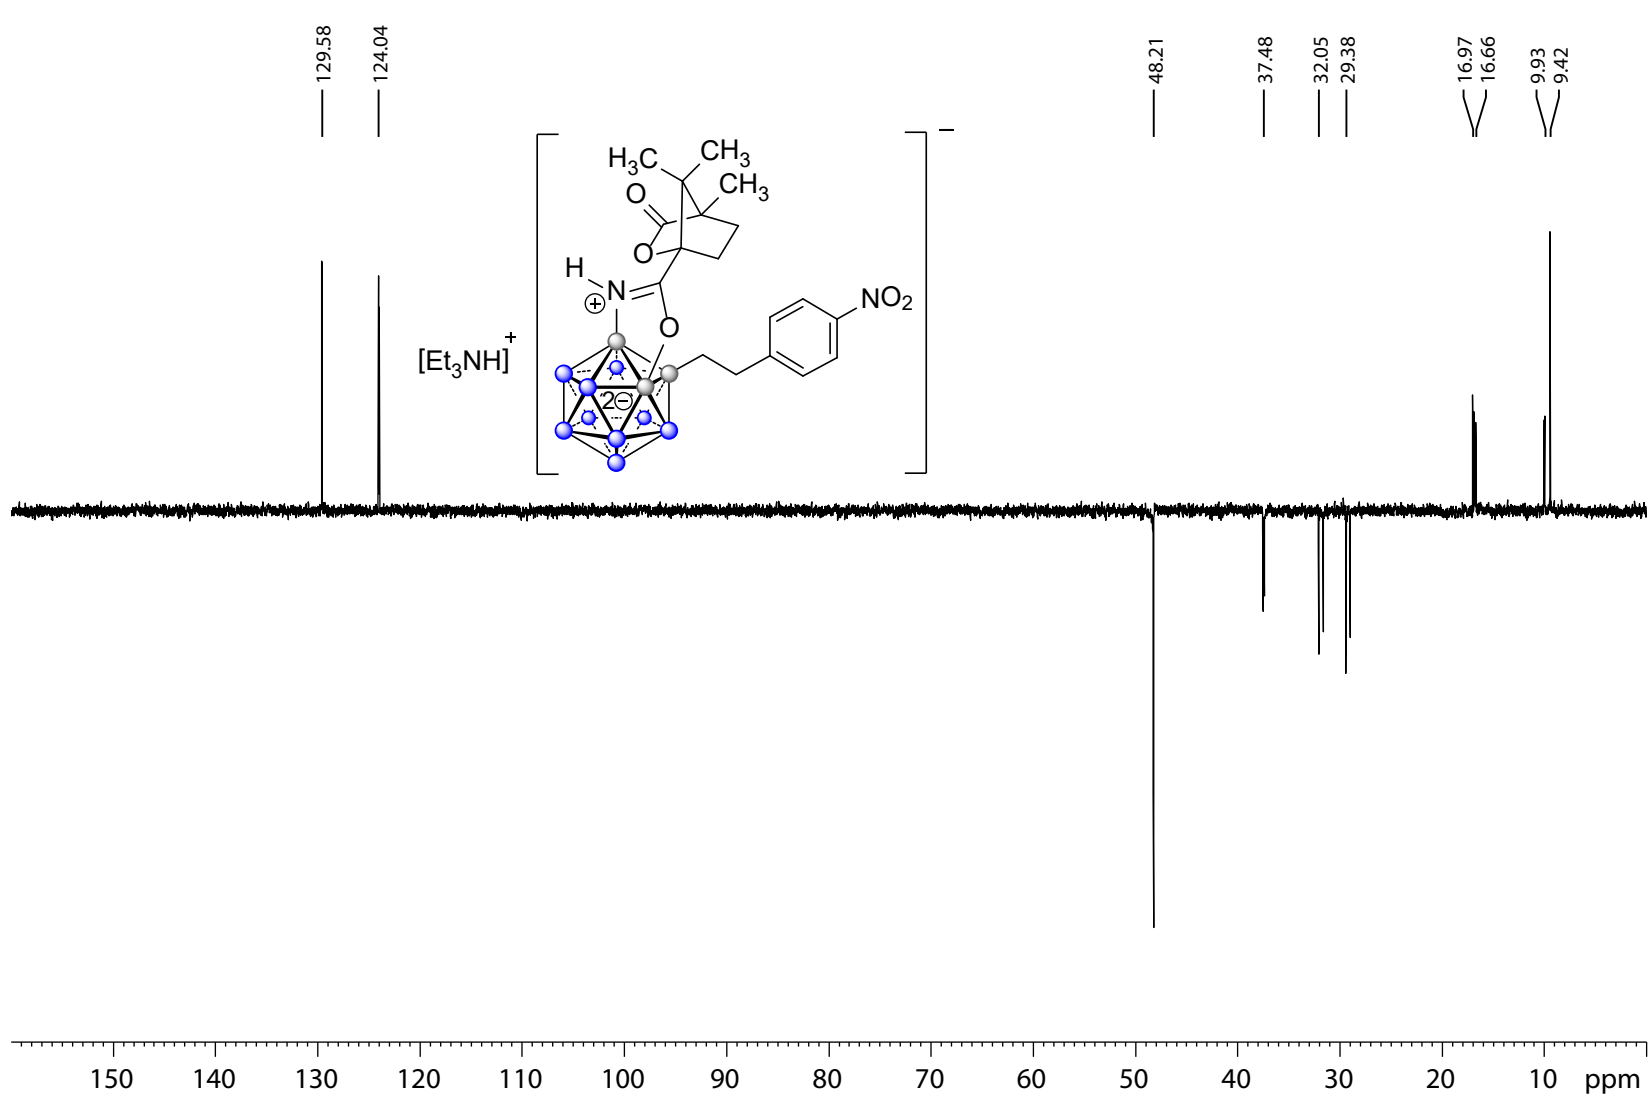

Current Data Parameters  
NAME 20191024-RV-B12C-4NO2Styr  
EXPNO 6  
PROCNO 1

F2 - Acquisition Parameters  
Date\_ 20191024  
Time\_ 16.53  
INSTRUM spect  
PROBHD 5 mm PABBO BB/  
PULPROG dept135  
TD 65536  
SOLVENT Acetone  
NS 512  
DS 4  
SWH 29296.875 Hz  
FIDRES 0.447035 Hz  
AQ 1.1184810 sec  
RG 193.34  
DW 17.067 usec  
DE 6.50 usec  
TE 296.2 K  
CNST2 145.0000000  
D1 2.0000000 sec  
D2 0.00344828 sec  
D12 0.00002000 sec  
TD0 1

===== CHANNEL f1 =====  
NUC1 13C  
P1 10.00 usec  
P2 20.00 usec  
PLW1 53.00000000 W  
SFO1 100.6228293 MHz

===== CHANNEL f2 =====  
CPDPRG[2] waltz16  
NUC2 1H  
P3 15.00 usec  
P4 30.00 usec  
PCPD2 80.00 usec  
PLW2 12.50000000 W  
PLW12 0.43945000 W  
SFO2 400.1316005 MHz

F2 - Processing parameters  
SI 32768  
SF 100.6126819 MHz  
WDW EM  
SSB 0  
LB 1.00 Hz  
GB 0  
PC 4.00

<sup>1</sup>H - <sup>1</sup>H COSY NMR

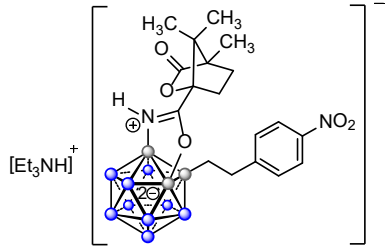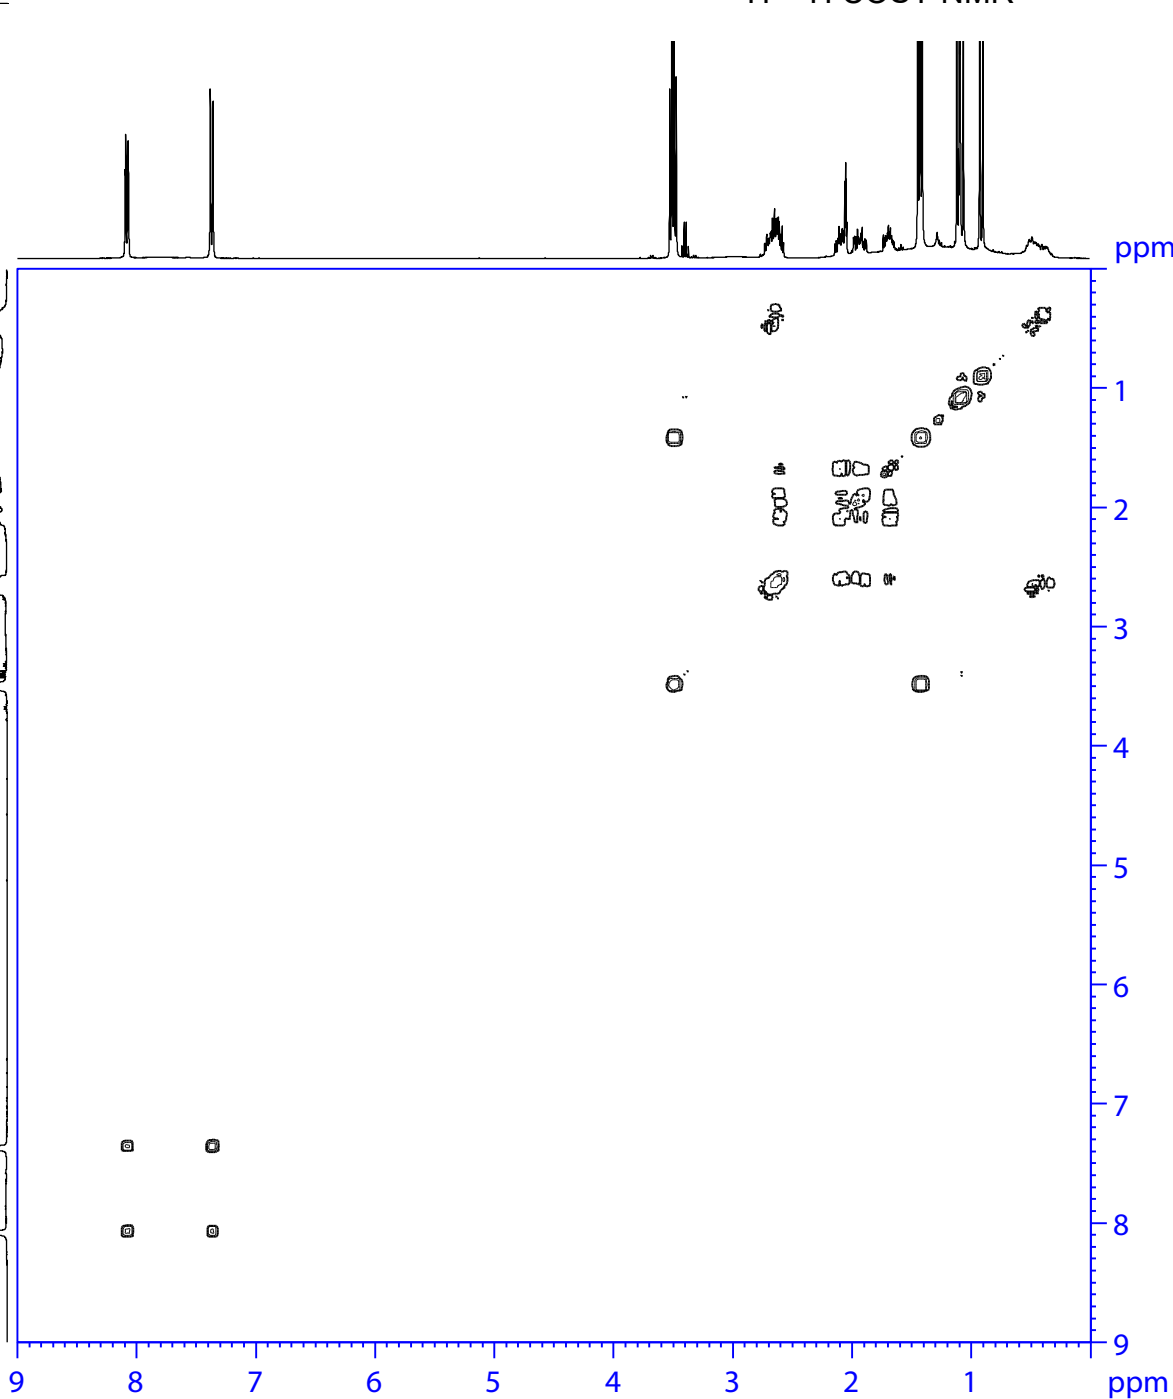

Current Data Parameters  
 NAME 20191024-RV-B12C-4NO2Styr  
 EXPNO 7  
 PROCNO 1

F2 - Acquisition Parameters  
 Date\_ 20191024  
 Time\_ 16.54  
 INSTRUM spect  
 PROBHD 5 mm PABBO BB/  
 PULPROG cosygpppqf  
 TD 2048  
 SOLVENT Acetone  
 NS 2  
 DS 8  
 SWH 5341.880 Hz  
 FIDRES 2.608340 Hz  
 AQ 0.1916928 sec  
 RG 193.34  
 DW 93.600 usec  
 DE 6.50 usec  
 TE 295.9 K  
 D0 0.0000300 sec  
 D1 2.0000000 sec  
 D11 0.03000000 sec  
 D12 0.00002000 sec  
 D13 0.00000400 sec  
 D16 0.00020000 sec  
 IN0 0.00018720 sec

===== CHANNEL f1 =====  
 NUC1 1H  
 P0 15.00 usec  
 P1 15.00 usec  
 P17 2500.00 usec  
 PLW1 12.5000000 W  
 PLW10 4.16050005 W  
 SFO1 400.1324057 MHz

===== GRADIENT CHANNEL =====  
 GPNAM[1] SMSQ10.100  
 GPZ1 10.00 %  
 P16 1000.00 usec

F1 - Acquisition parameters  
 TD 128  
 SFO1 400.1324 MHz  
 FIDRES 83.466881 Hz  
 SW 13.350 ppm  
 FnMODE QF

F2 - Processing parameters  
 SI 1024  
 SF 400.1300095 MHz  
 WDW QSINE  
 SSB 0  
 LB 0 Hz  
 GB 0  
 PC 1.40

F1 - Processing parameters  
 SI 1024  
 MC2 QF  
 SF 400.1300096 MHz  
 WDW QSINE  
 SSB 0  
 LB 0 Hz  
 GB 0



<sup>1</sup>H - <sup>13</sup>C HSQC NMR

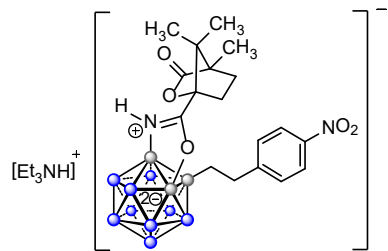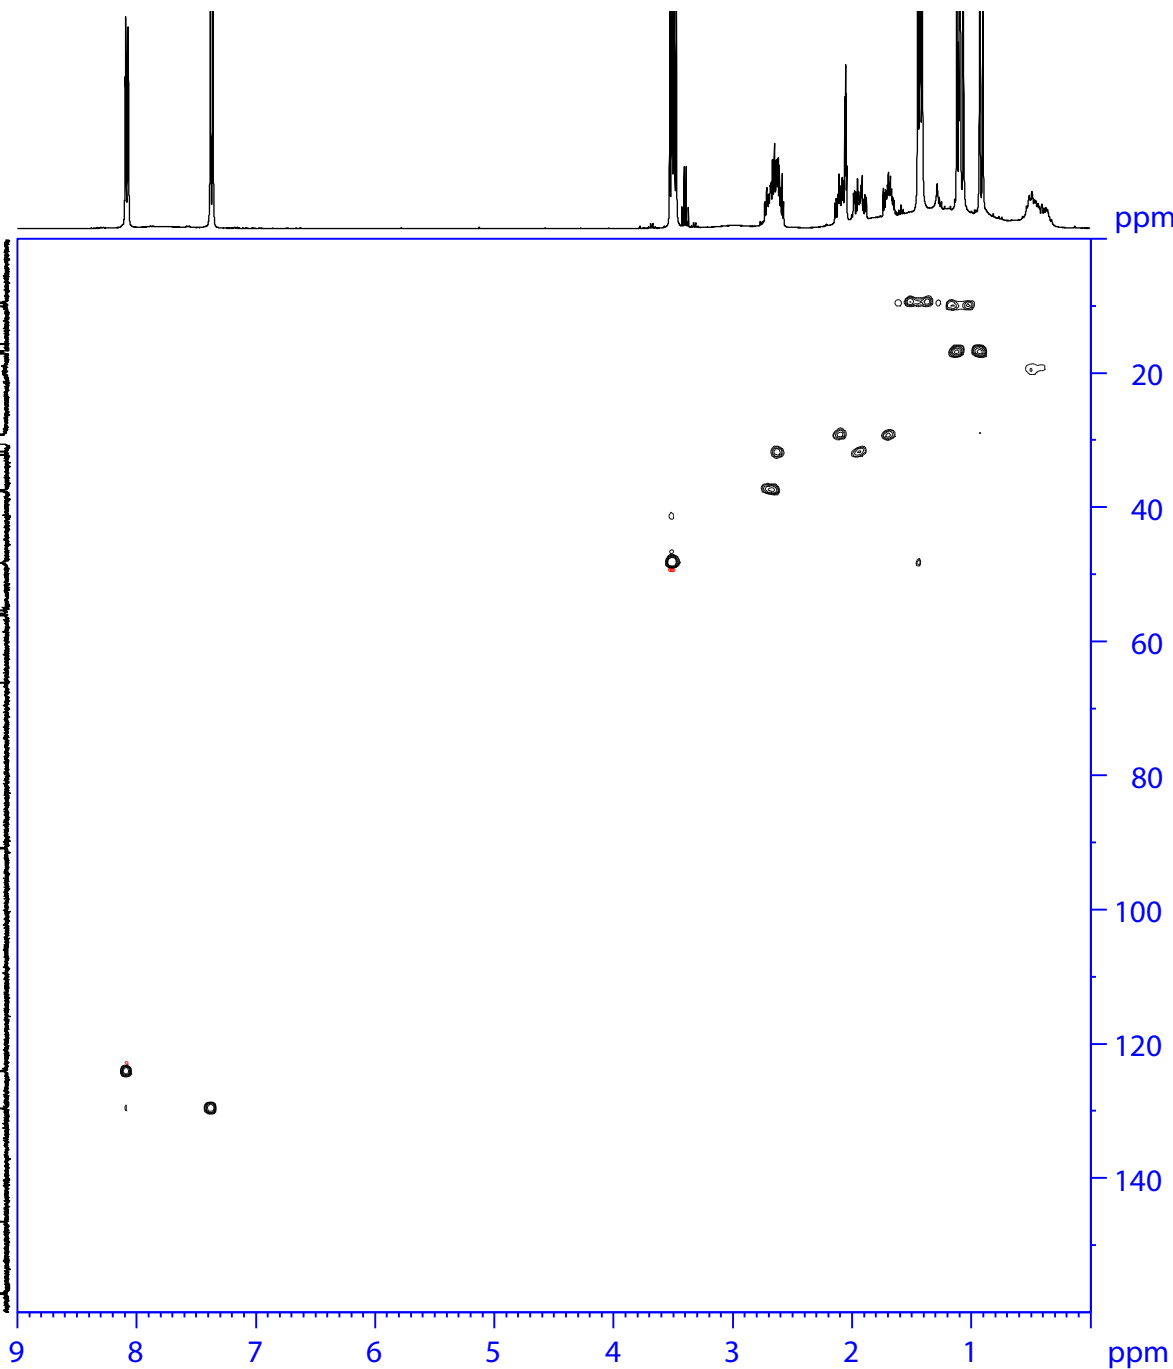

Current Data Parameters  
 NAME 20191024-RV-B12C-4NO2Styr  
 EXPNO 8  
 PROCNO 1

F2 - Acquisition Parameters  
 Date\_ 20191024  
 Time 17.04  
 INSTRUM spect  
 PROBHD 5 mm PABBO BB/  
 PULPROG hsqcetgps12  
 TD 1024  
 SOLVENT Acetone  
 NS 2  
 DS 16  
 SWH 6009.615 Hz  
 FIDRES 5.868765 Hz  
 AQ 0.0851968 sec  
 RG 193.34  
 DW 83.200 usec  
 DE 6.50 usec  
 TE 296.2 K  
 CNST2 145.0000000  
 D0 0.00000300 sec  
 D1 1.50000000 sec  
 D4 0.00172414 sec  
 D11 0.03000000 sec  
 D16 0.00020000 sec  
 D24 0.00086207 sec  
 INO 0.00001990 sec  
 ZGOPTNS

===== CHANNEL f1 =====  
 NUC1 1H  
 P1 15.00 usec  
 P2 30.00 usec  
 P28 1000.00 usec  
 PLW1 12.50000000 W  
 SFO1 400.1328009 MHz

===== CHANNEL f2 =====  
 CPDPRG2 gaxp  
 NUC2 13C  
 P3 10.00 usec  
 P4 20.00 usec  
 PCPD2 70.00 usec  
 PLW2 53.00000000 W  
 PLW12 1.08159995 W  
 SFO2 100.6238364 MHz

===== GRADIENT CHANNEL =====  
 GPNAM[1] SMSQ10.100  
 GPNAM[2] SMSQ10.100  
 GPNAM[3] SMSQ10.100  
 GPNAM[4] SMSQ10.100  
 GPZ1 80.00 %  
 GPZ2 20.10 %  
 GPZ3 11.00 %  
 GPZ4 -5.00 %  
 P16 1000.00 usec  
 P19 600.00 usec

F1 - Acquisition parameters  
 TD 256  
 SFO1 100.6238 MHz  
 FIDRES 196.524048 Hz  
 SW 249.991 ppm  
 FmMODE Echo-Antiecho

F2 - Processing parameters  
 SI 1024  
 SF 400.1300043 MHz  
 WDW QSINE  
 SSB 2  
 LB 0 Hz  
 GB 0  
 PC 1.40

F1 - Processing parameters  
 SI 1024  
 MC2 echo-antiecho  
 SF 100.6126709 MHz  
 WDW QSINE  
 SSB 2  
 LB 0 Hz  
 GB 0

20190110-B12M-Styr 10 mg white solid [Et<sub>3</sub>NH][B<sub>12</sub>H<sub>10</sub>NHCO(Menthyl)CH<sub>2</sub>CH<sub>2</sub>C<sub>6</sub>H<sub>5</sub>] dissolved in 0.6 mL acetone-*d*6\*

400MHz <sup>1</sup>H NMR, ◊ deuterated solvent residual peak; ◊ water peak

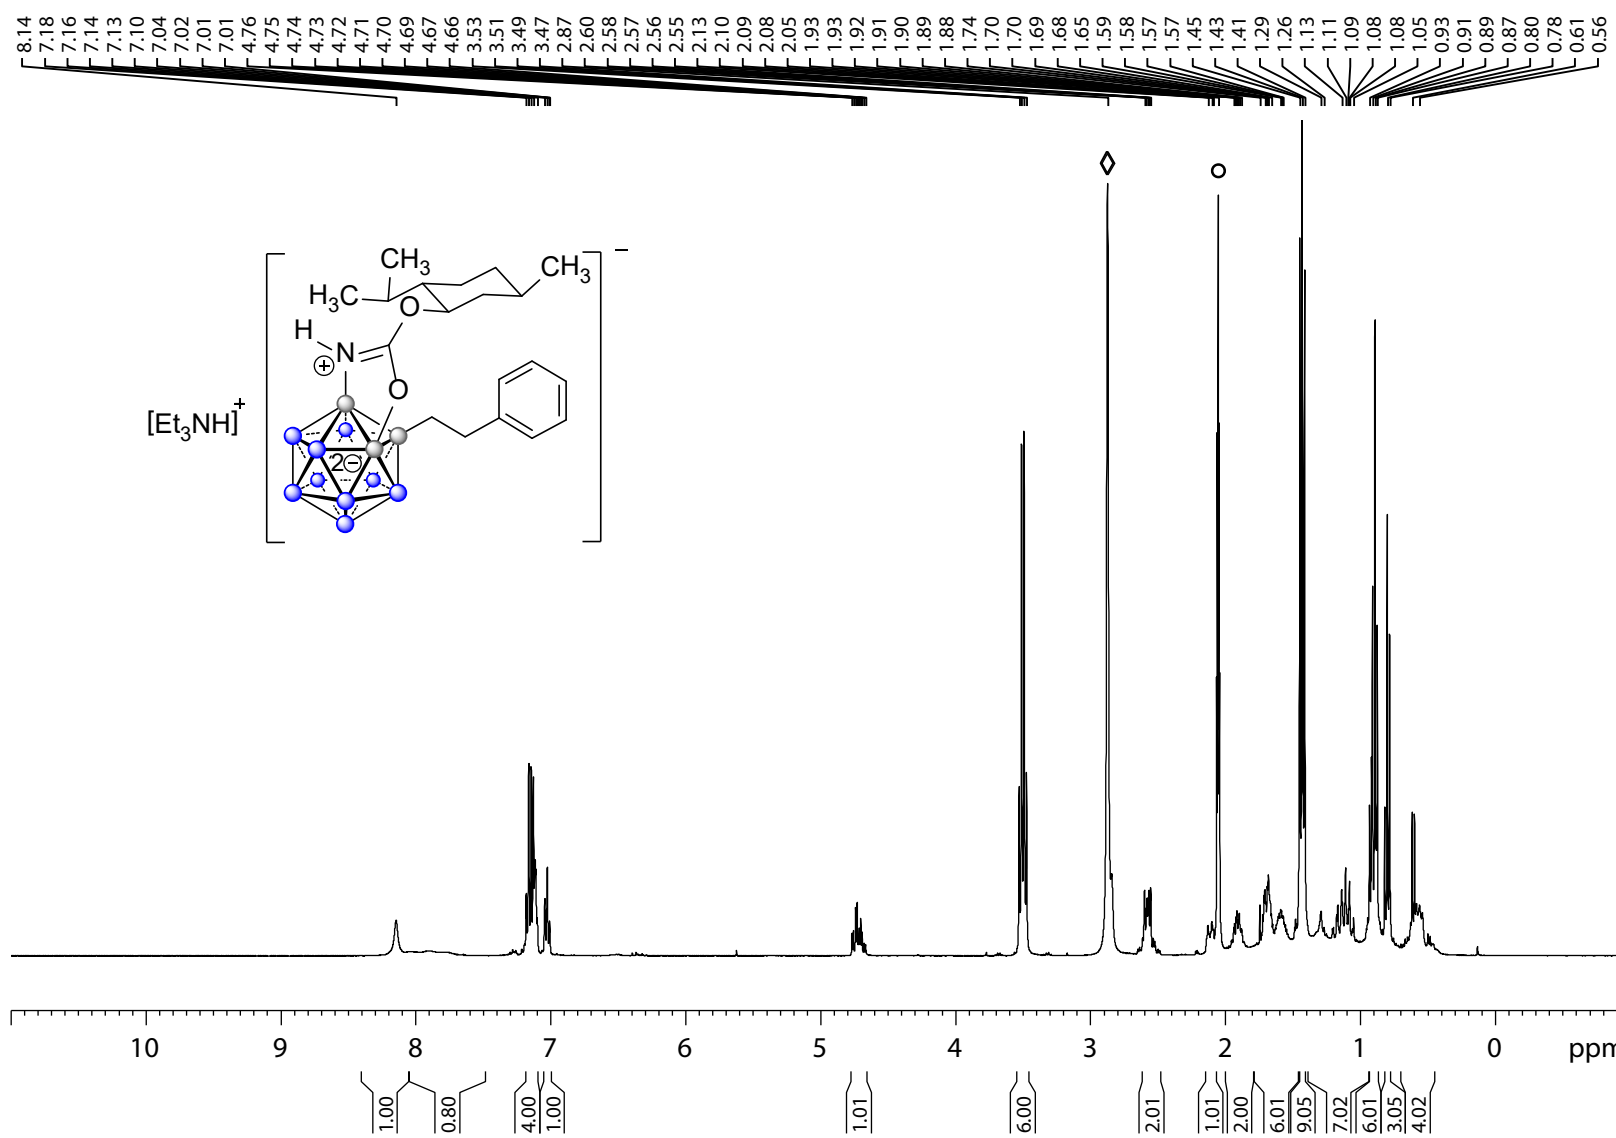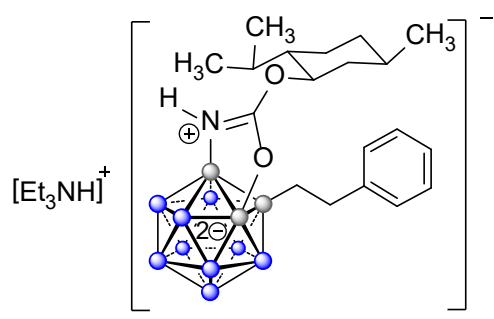

```

Current Data Parameters
NAME      20190110-RV-B12-MENTH-STYR-1Cu
EXPNO    1
PROCNO   1

F2 - Acquisition Parameters
Date_    20190111
Time     19.19
INSTRUM  spect
PROBHD   5 mm PABBO BB/
PULPROG  zg30
TD       65536
SOLVENT  Acetone
NS       128
DS       2
SWH      10000.000 Hz
FIDRES   0.152588 Hz
AQ       3.2767999 sec
RG       193.34
DW       50.000 usec
DE       6.50 usec
TE       296.3 K
D1       1.00000000 sec
TD0      1

===== CHANNEL f1 =====
NUC1     1H
P1       15.00 usec
PLWL    12.50000000 W
SFO1    400.1328009 MHz

F2 - Processing parameters
SI       65536
SF       400.1300069 MHz
WDW      EM
SSB      0
LB       0.30 Hz
GB       0
PC       1.00
    
```

20190110-B12M-Styr 10 mg white solid  $[\text{Et}_3\text{NH}][\text{B}_{12}\text{H}_{10}\text{NHCO}(\text{Menthyl})\text{CH}_2\text{CH}_2\text{C}_6\text{H}_5]$  dissolved in 0.6 mL acetone- $d_6^*$

400MHz  $^1\text{H}\{\text{B}\}$  NMR,  $\circ$  deuterated solvent residual peak= 2.05 ppm;  $\diamond$  water peak

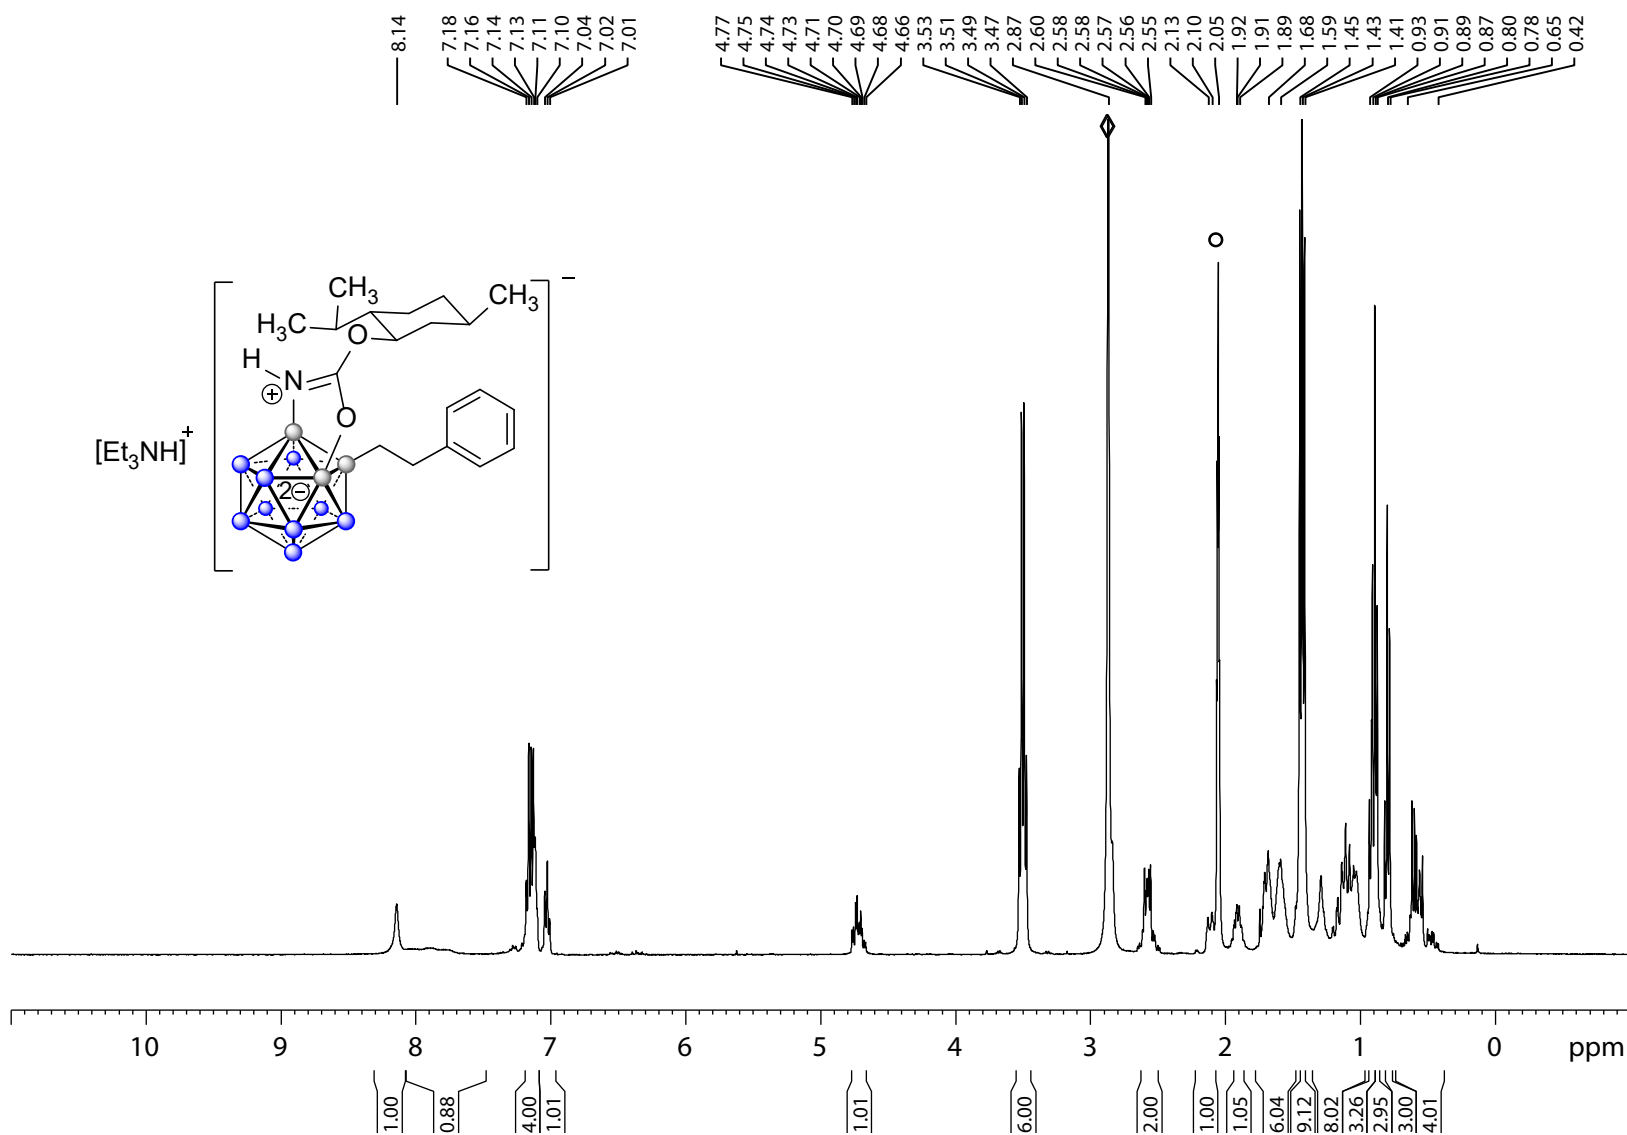

Current Data Parameters  
 NAME 20190110-RV-B12-MENTH-STYR-1Cu  
 EXPNO 2  
 PROCNO 1

F2 - Acquisition Parameters  
 Date\_ 20190111  
 Time\_ 19.21  
 INSTRUM spect  
 PROBHD 5 mm PABBO BB/  
 PULPROG zgig30  
 TD 16384  
 SOLVENT Acetone  
 NS 16  
 DS 4  
 SWH 8012.820 Hz  
 FIDRES 0.489064 Hz  
 AQ 1.0223616 sec  
 RG 107.6  
 DW 62.400 usec  
 DE 6.50 usec  
 TE 296.4 K  
 D1 1.00000000 sec  
 D11 0.03000000 sec  
 TD0 1

==== CHANNEL f1 =====  
 NUC1 1H  
 P1 15.00 usec  
 PLW1 12.50000000 W  
 SFO1 400.1320007 MHz

==== CHANNEL f2 =====  
 CPDPRG[2] garp4  
 NUC2 11B  
 PCPD2 90.00 usec  
 PLW2 52.96599960 W  
 PLW12 0.64477998 W  
 SFO2 128.3776050 MHz

F2 - Processing parameters  
 SI 32768  
 SF 400.1300070 MHz  
 WDW EM  
 SSB 0  
 LB 1.00 Hz  
 GB 0  
 PC 1.40

20190110-B12M-Styr 10 mg white solid  $[\text{Et}_3\text{NH}][\text{B}_{12}\text{H}_{10}\text{NHCO}(\text{Menthyl})\text{CH}_2\text{CH}_2\text{C}_6\text{H}_5]$  dissolved in 0.6 mL acetone- $d_6^*$

$^{11}\text{B}$  NMR 128 MHz

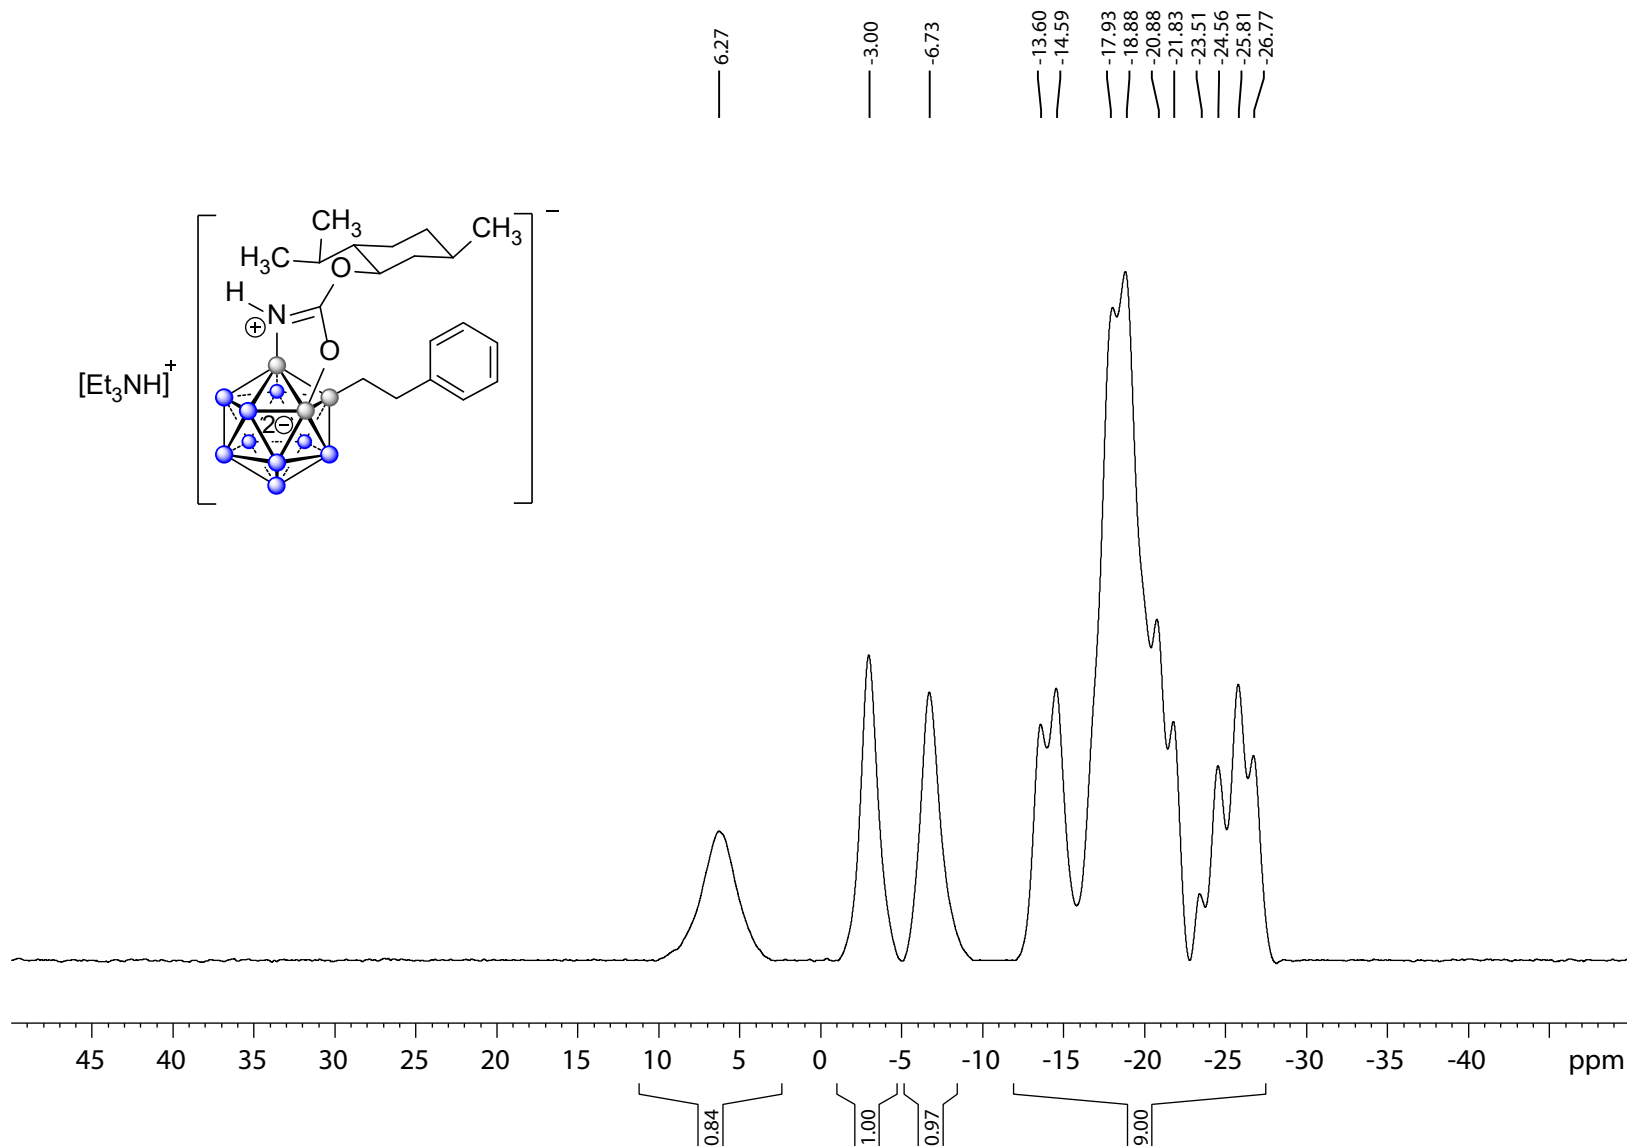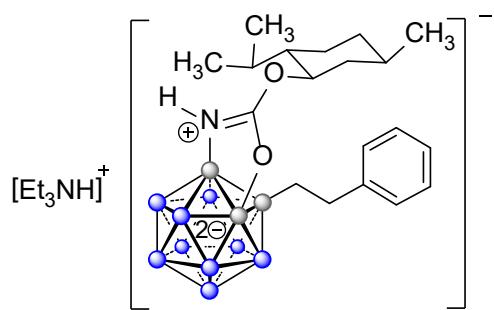

Current Data Parameters  
NAME 20190622-B12M-Styr-B  
EXPNO 3  
PROCNO 1

F2 - Acquisition Parameters  
Date\_ 20190623  
Time\_ 0  
INSTRUM spect  
PROBHD 5 mm PABBO BB/  
PULPROG zg  
TD 65536  
SOLVENT Acetone  
NS 640  
DS 4  
SWH 25510.203 Hz  
FIDRES 0.389255 Hz  
AQ 1.2845056 sec  
RG 193.34  
DW 19.600 usec  
DE 6.50 usec  
TE 296.1 K  
D1 1.00000000 sec  
TD0 1

==== CHANNEL f1 =====  
NUC1 11B  
P1 9.93 usec  
PLW1 52.96599960 W  
SFO1 128.3776052 MHz

F2 - Processing parameters  
SI 32768  
SF 128.3776050 MHz  
WDW EM  
SSB 0  
LB 20.00 Hz  
GB 0  
PC 1.40

20190110-B12M-Styr 10 mg white solid  $[\text{Et}_3\text{NH}][\text{B}_{12}\text{H}_{10}\text{NHCO}(\text{Menthyl})\text{CH}_2\text{CH}_2\text{C}_6\text{H}_5]$  dissolved in 0.6 mL acetone- $d_6^*$

$^{11}\text{B}\{^1\text{H}\}$  NMR 128 MHz

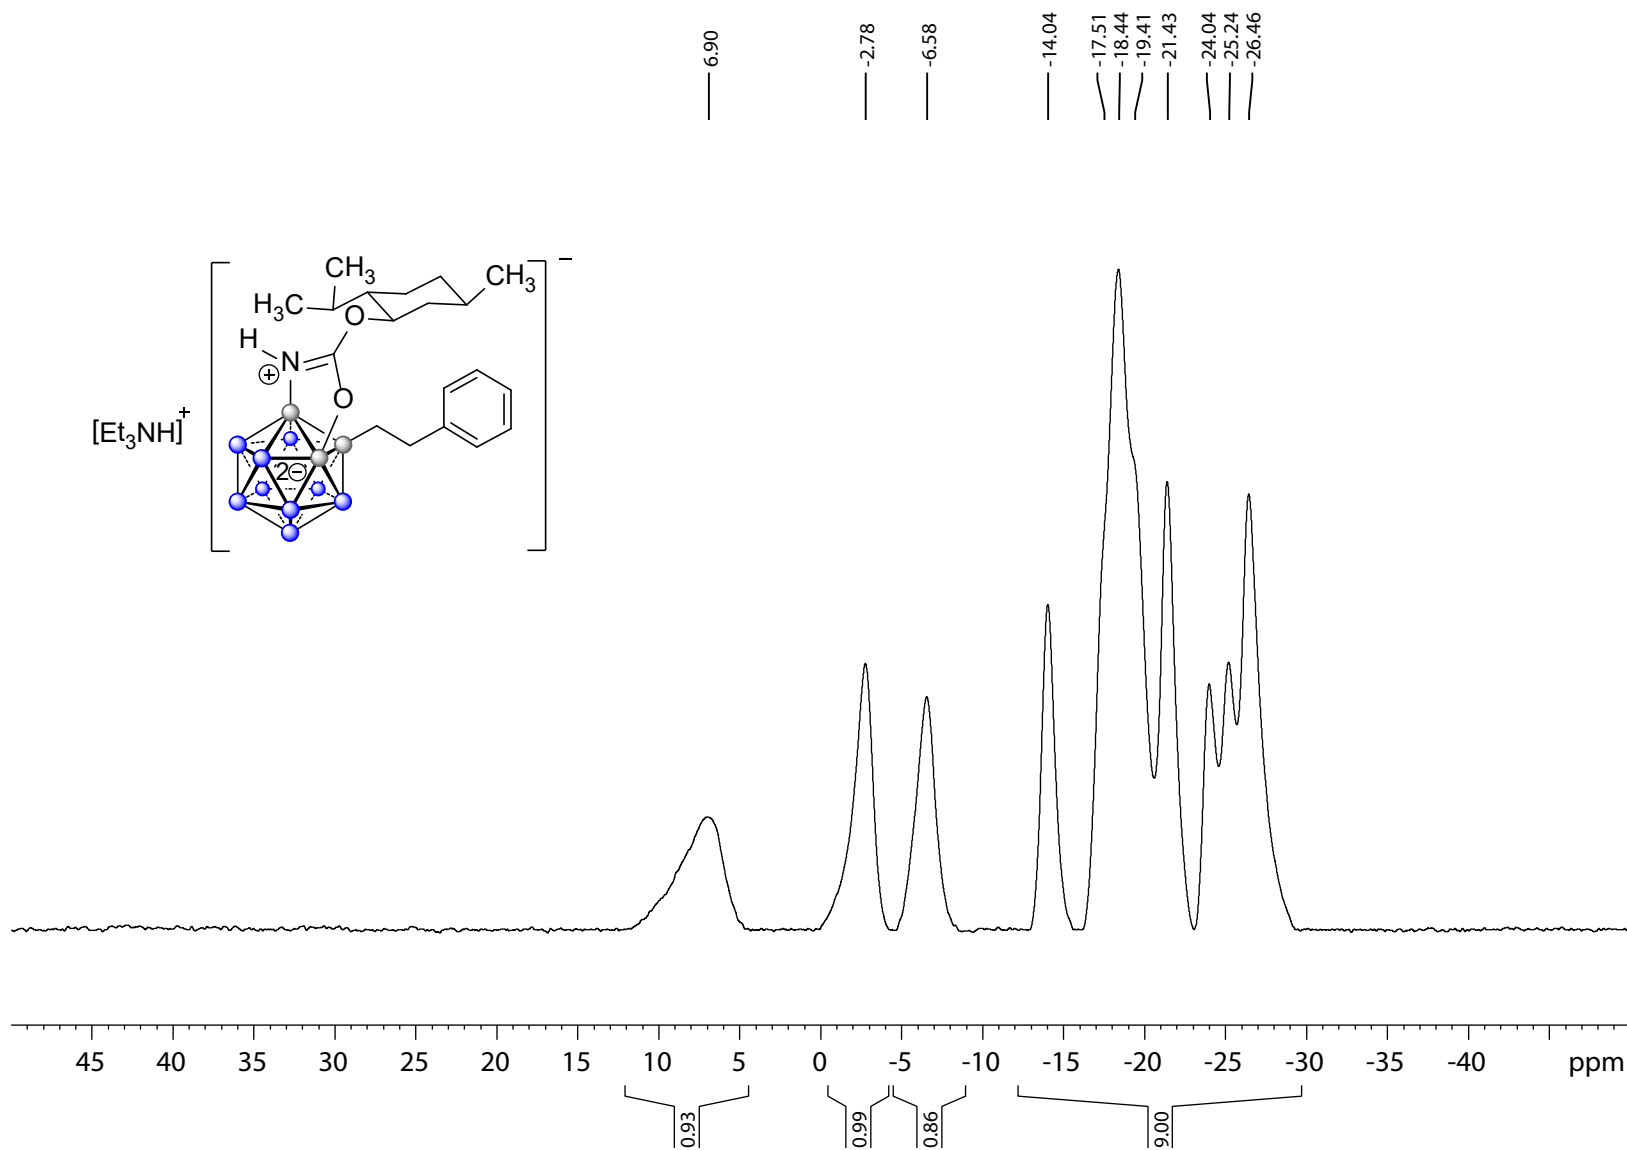

Current Data Parameters  
 NAME 20190622-B12M-Styr-B  
 EXPNO 4  
 PROCNO 1

F2 - Acquisition Parameters  
 Date\_ 20190623  
 Time\_ 0.26  
 INSTRUM spect  
 PROBHD 5 mm PABBO BB/  
 PULPROG zgpg30  
 TD 65536  
 SOLVENT Acetone  
 NS 640  
 DS 4  
 SWH 25510.203 Hz  
 FIDRES 0.389255 Hz  
 AQ 1.2845056 sec  
 RG 193.34  
 DW 19.600 usec  
 DE 6.50 usec  
 TE 297.3 K  
 D1 1.00000000 sec  
 D11 0.03000000 sec  
 TD0 1

===== CHANNEL f1 =====  
 NUC1 11B  
 P1 9.93 usec  
 PLW1 52.96599960 W  
 SFO1 128.3776050 MHz

===== CHANNEL f2 =====  
 CPDPRG[2] waltz16  
 NUC2 1H  
 PCPD2 80.00 usec  
 PLW2 12.50000000 W  
 PLW12 0.43945000 W  
 PLW13 0.28125000 W  
 SFO2 400.1320007 MHz

F2 - Processing parameters  
 SI 32768  
 SF 128.3776050 MHz  
 WDW EM  
 SSB 0  
 LB 20.00 Hz  
 GB 0  
 PC 1.40

20190110-B12M-Styr 10 mg white solid  $[\text{Et}_3\text{NH}]_2[\text{B}_{12}\text{H}_{10}\text{NHC}(\text{Menthyl})\text{CH}_2\text{CH}_2\text{C}_6\text{H}_5]$  dissolved in 0.6 mL acetone- $d_6$ \*

$^{13}\text{C}\{^1\text{H}\}$  NMR 100 MHz

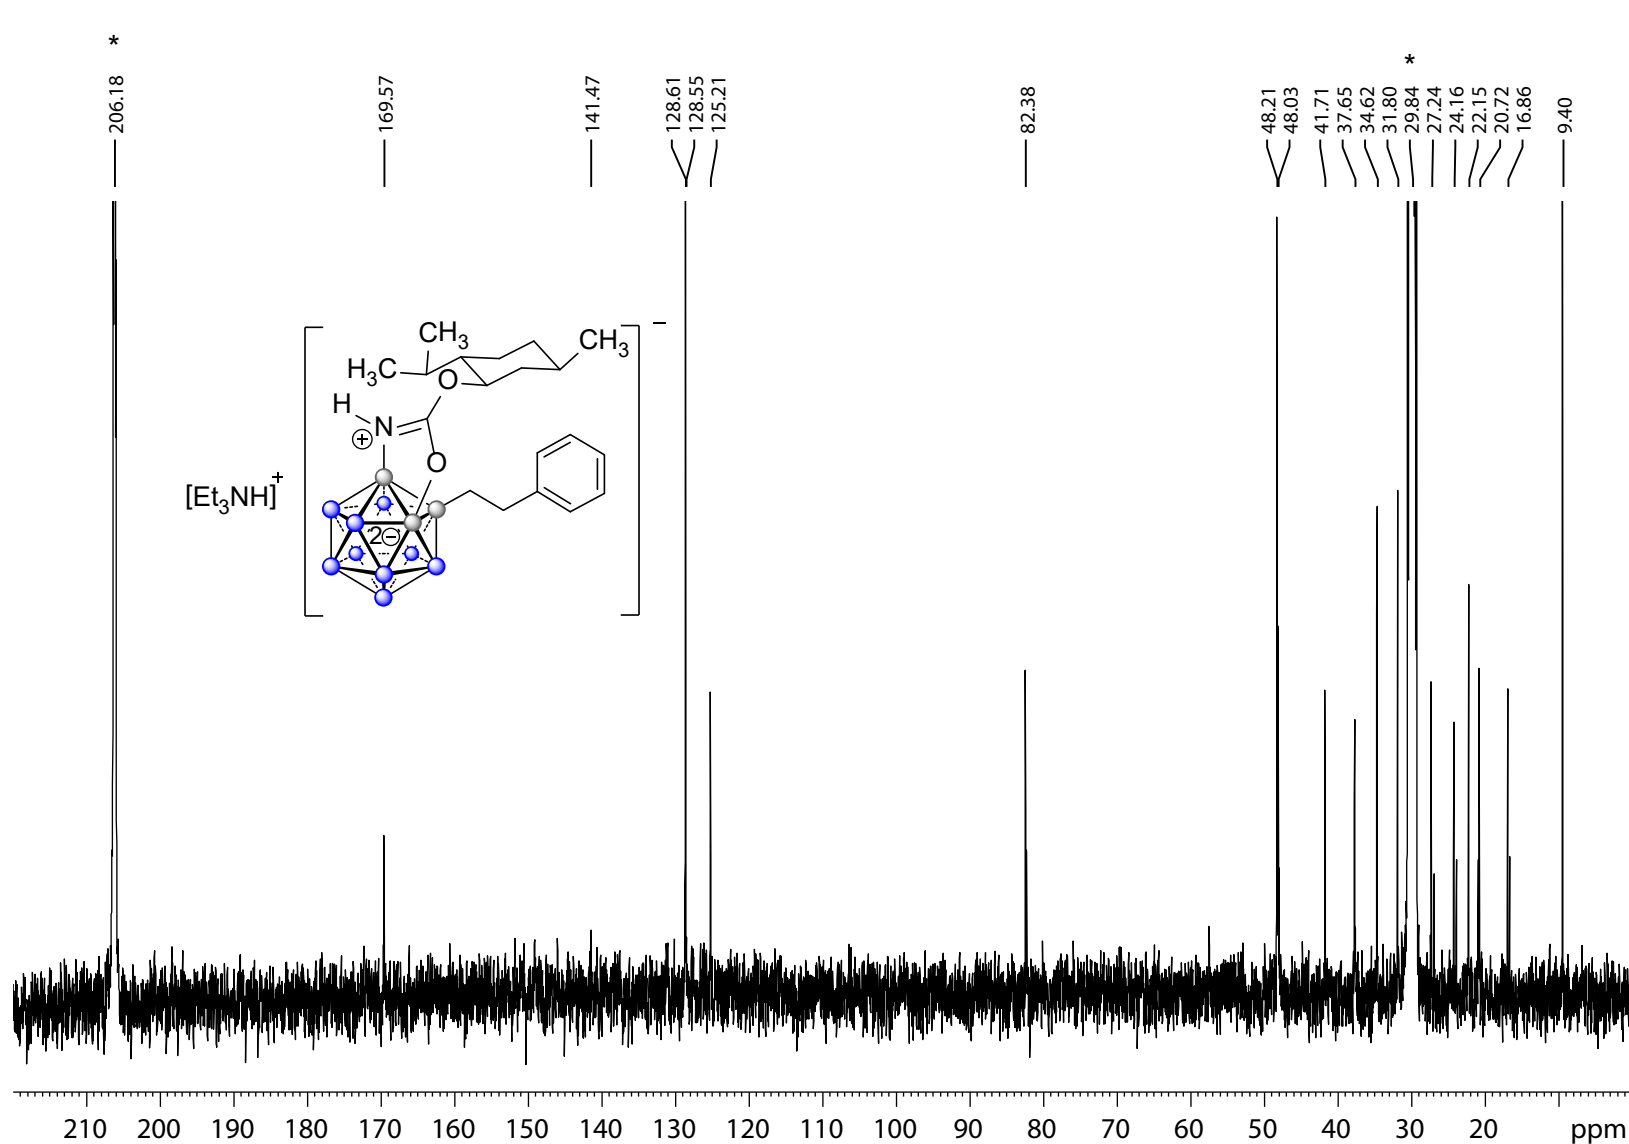

Current Data Parameters  
 NAME 20190110-RV-B12-MENTH-STYR-1C  
 EXPNO 5  
 PROCNO 1

F2 - Acquisition Parameters  
 Date\_ 20190111  
 Time\_ 21.06  
 INSTRUM spect  
 PROBHD 5 mm PABBO BB/  
 PULPROG zgpg30  
 TD 65536  
 SOLVENT Acetone  
 NS 2048  
 DS 4  
 SWH 29761.904 Hz  
 FIDRES 0.454131 Hz  
 AQ 1.1010048 sec  
 RG 193.34  
 DW 16.800 usec  
 DE 6.50 usec  
 TE 297.1 K  
 D1 1.50000000 sec  
 D11 0.03000000 sec  
 TD0 1

==== CHANNEL f1 =====  
 NUC1 13C  
 P1 10.00 usec  
 PLW1 53.00000000 W  
 SFO1 100.6228293 MHz

==== CHANNEL f2 =====  
 CPDPRG[2] waltz16  
 NUC2 1H  
 PCPD2 80.00 usec  
 PLW2 12.50000000 W  
 PLW12 0.43945000 W  
 PLW13 0.28125000 W  
 SFO2 400.1316005 MHz

F2 - Processing parameters  
 SI 32768  
 SF 100.6126794 MHz  
 WDW EM  
 SSB 0  
 LB 2.00 Hz  
 GB 0  
 PC 1.40

20190110-B12M-Styr 10 mg white solid [Et<sub>3</sub>NH][B<sub>12</sub>H<sub>10</sub>NHCO(Menthyl)CH<sub>2</sub>CH<sub>2</sub>C<sub>6</sub>H<sub>5</sub>] dissolved in 0.6 mL acetone-d<sub>6</sub>\*

<sup>13</sup>CDEPT NMR 100 MHz

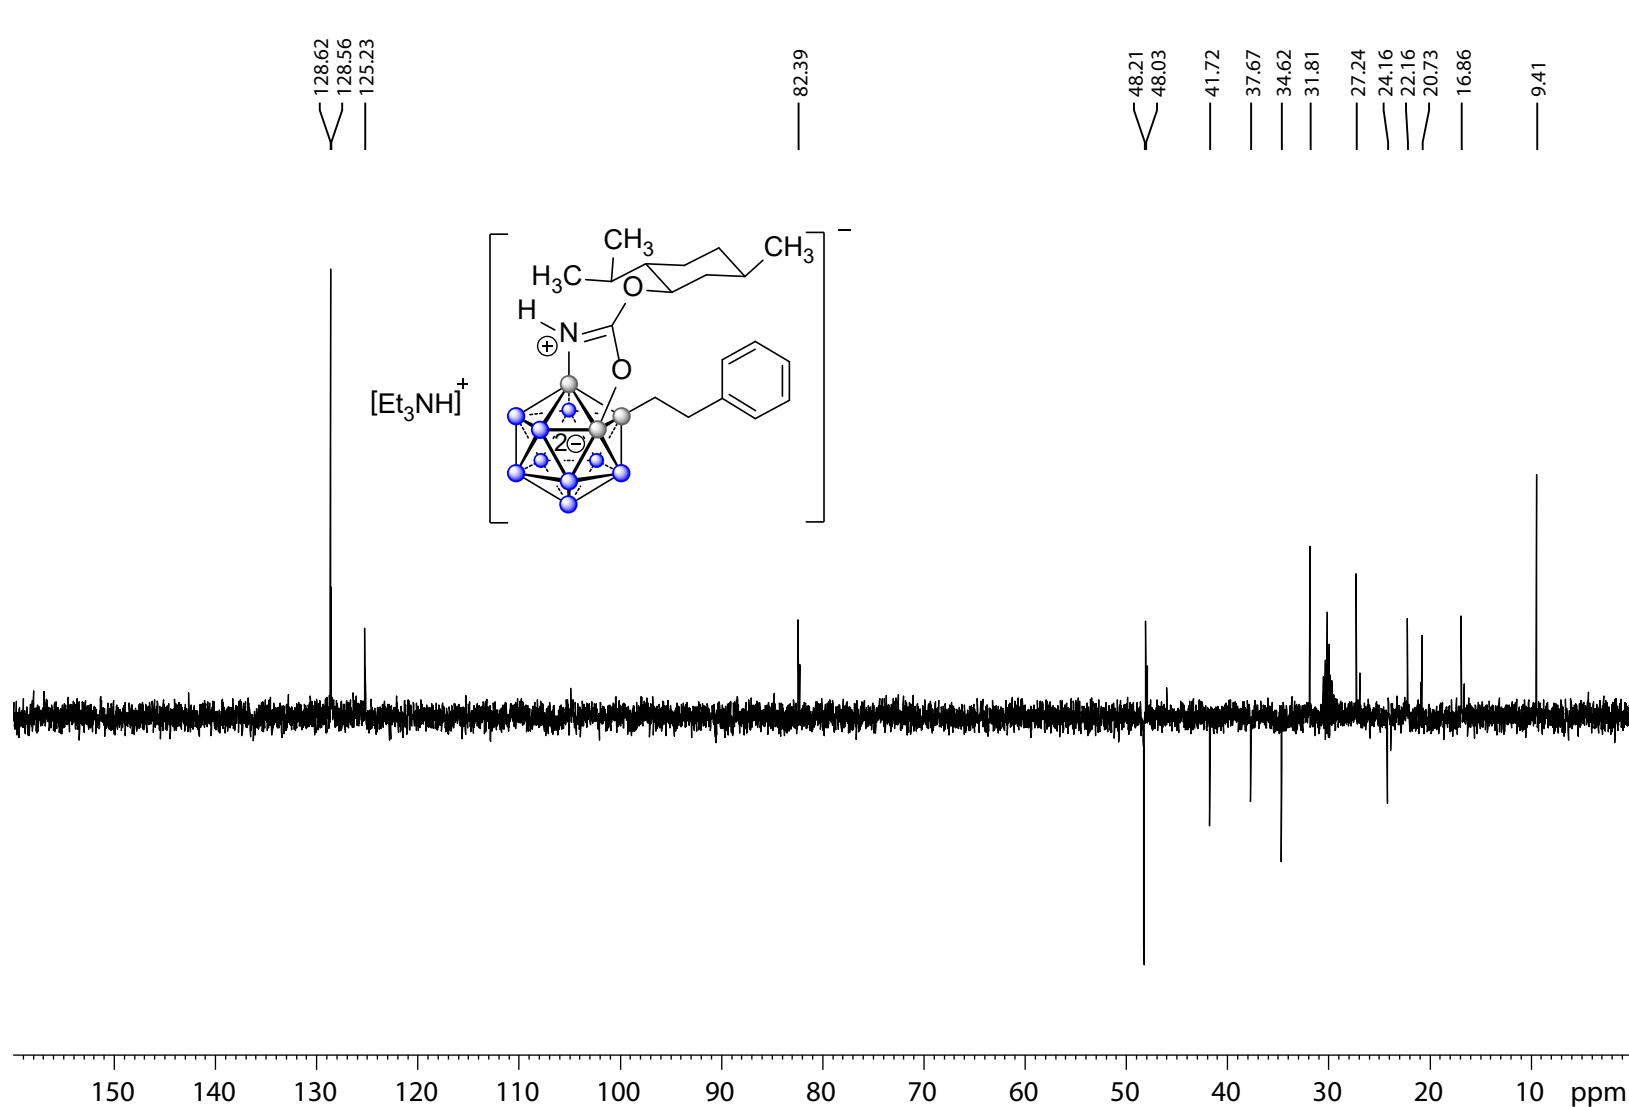

Current Data Parameters  
 NAME 20190110-RV-B12-MENTH-STYR-1Cu  
 EXPNO 6  
 PROCNO 1

F2 - Acquisition Parameters

Date 20190111  
 Time 21.34  
 INSTRUM spect  
 PROBHD 5 mm PABBO BB/  
 PULPROG dept135  
 TD 65536  
 SOLVENT Acetone  
 NS 512  
 DS 4  
 SWH 29296.875 Hz  
 FIDRES 0.447035 Hz  
 AQ 1.1184810 sec  
 RG 193.34  
 DW 17.067 usec  
 DE 6.50 usec  
 TE 296.7 K  
 CNST2 145.0000000  
 D1 2.00000000 sec  
 D2 0.00344828 sec  
 D12 0.00002000 sec  
 TD0 1

==== CHANNEL f1 =====  
 NUC1 13C  
 P1 10.00 usec  
 P2 20.00 usec  
 PLW1 53.00000000 W  
 SFO1 100.6228293 MHz

==== CHANNEL f2 =====  
 CPDPRG[2] waltz16  
 NUC2 1H  
 P3 15.00 usec  
 P4 30.00 usec  
 PCPD2 80.00 usec  
 PLW2 12.50000000 W  
 PLW12 0.43945000 W  
 SFO2 400.1316005 MHz

F2 - Processing parameters

SI 32768  
 SF 100.6126793 MHz  
 WDW EM  
 SSB 0  
 LB 1.00 Hz  
 GB 0  
 PC 4.00

20190110-B12M-Styr 10 mg white solid [Et<sub>3</sub>NH][B<sub>12</sub>H<sub>10</sub>NHCO(Menthyl)CH<sub>2</sub>CH<sub>2</sub>C<sub>6</sub>H<sub>5</sub>] dissolved in 0.6 mL acetone-d<sub>6</sub>\*

<sup>1</sup>H - <sup>13</sup>C HSQC NMR

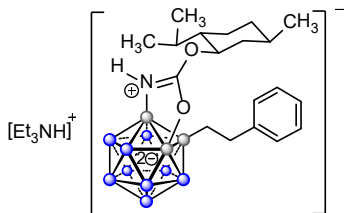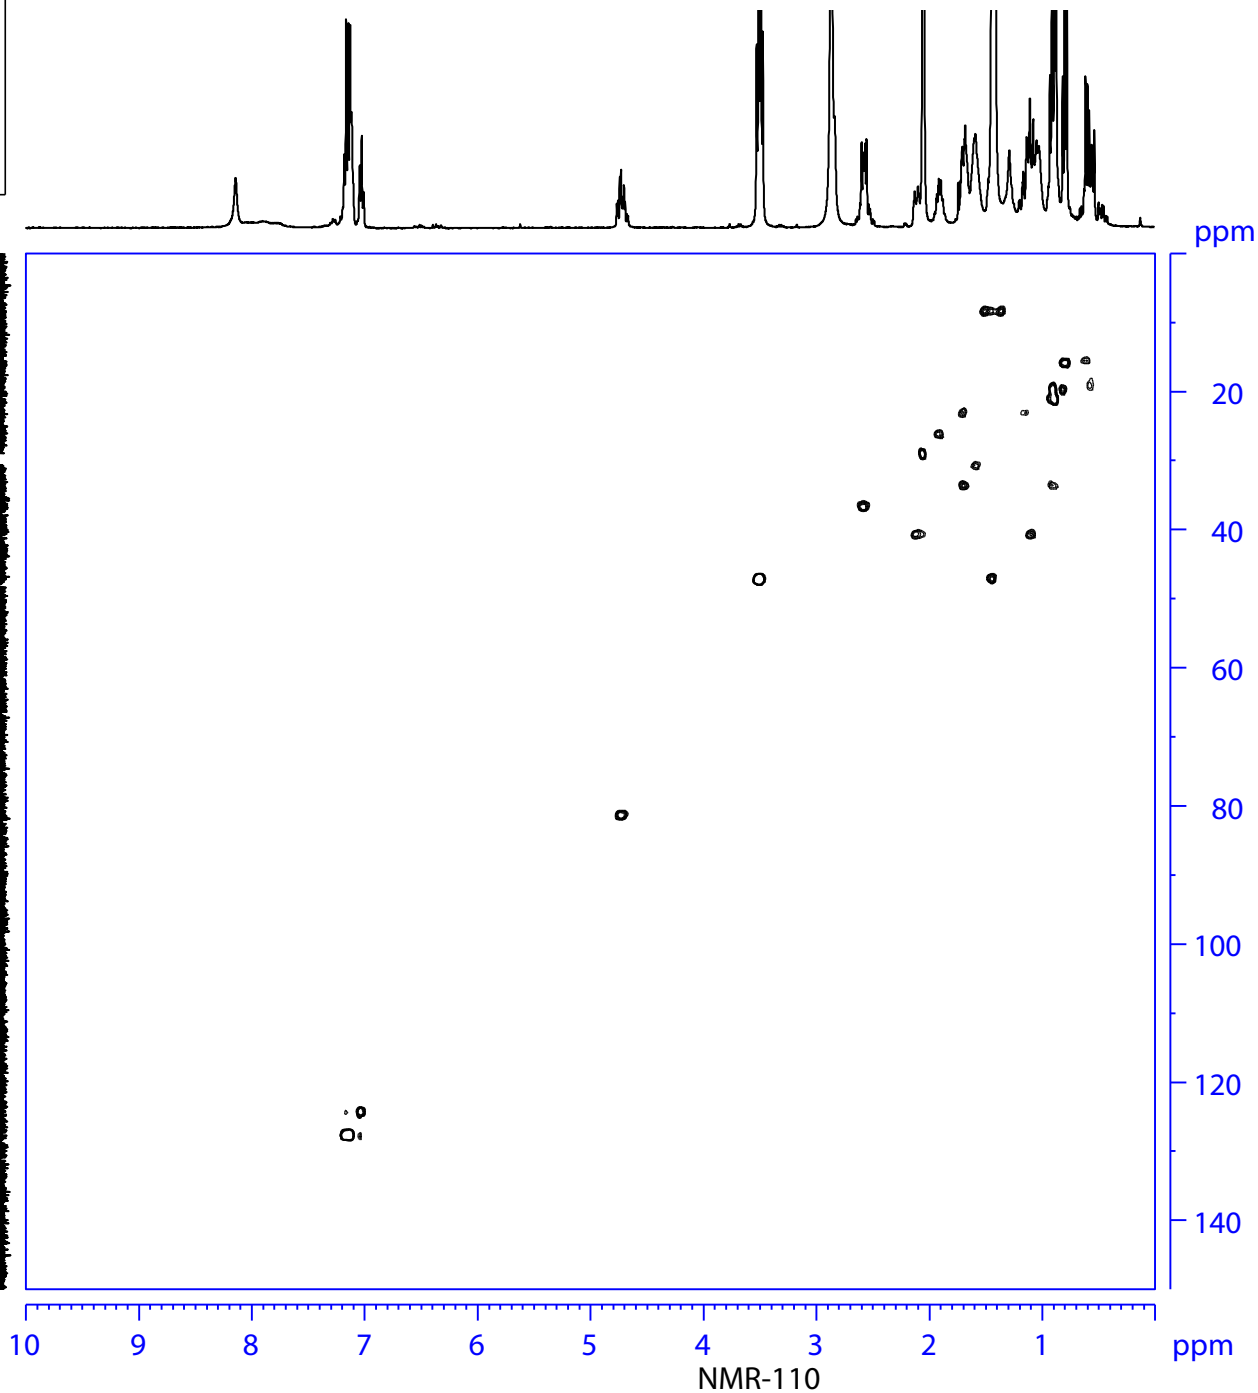

```
Current Data Parameters
NAME      20190110-RV-B12-MENTH-STYR-1Cu
EXPNO     7
PROCNO    1

F2 - Acquisition Parameters
Date_     20190111
Time      21.35
INSTRUM   spect
PROBHD    5 mm PABBO BB/
PULPROG   hsqcetpsi2
TD         1024
SOLVENT   Acetone
NS         2
DS         16
SWH        6009.615 Hz
FIDRES     5.868765 Hz
AQ         0.0851968 sec
RG         193.34
DW         83.200 usec
DE         6.50 usec
TE         296.4 K
CNST2     145.0000000
D0         0.00000300 sec
D1         1.50000000 sec
D4         0.00172414 sec
D11        0.03000000 sec
D16        0.00020000 sec
D24        0.00086207 sec
IN0        0.00001990 sec
ZGOPTNS

===== CHANNEL f1 =====
NUC1       1H
P1         15.00 usec
P2         30.00 usec
P28        1000.00 usec
PLW1       12.50000000 W
SFO1       400.1328009 MHz

===== CHANNEL f2 =====
CPDPRG[2]  garp
NUC2       13C
P3         10.00 usec
P4         20.00 usec
PCPD2      70.00 usec
PLW2       53.00000000 W
PLW12      1.08159995 W
SFO2       100.6238364 MHz

===== GRADIENT CHANNEL =====
GPNAM[1]   SMSQ10.100
GPNAM[2]   SMSQ10.100
GPNAM[3]   SMSQ10.100
GPNAM[4]   SMSQ10.100
GPZ1       80.00 %
GPZ2       20.10 %
GPZ3       11.00 %
GPZ4       -5.00 %
P16        1000.00 usec
P19        600.00 usec

F1 - Acquisition parameters
TD         256
SFO1       100.6238 MHz
FIDRES     196.524048 Hz
SW         249.991 ppm
FnMODE     Echo-Antiecho

F2 - Processing parameters
SI         1024
SF         400.1300000 MHz
WDW        QSINE
SSB        2
LB         0 Hz
GB         0
PC         1.40

F1 - Processing parameters
SI         1024
MC2        echo-antiecho
SF         100.6127690 MHz
WDW        QSINE
SSB        2
LB         0 Hz
GB         0
```



20190122-B12M-4MeStyr 20 mg white solid [Et<sub>3</sub>NH][B<sub>12</sub>H<sub>10</sub>NHC(Menthyl)OCH<sub>2</sub>CH<sub>2</sub>C<sub>6</sub>H<sub>4</sub>Me] dissolved in 0.6 mL acetone-d<sub>6</sub>\*

400MHz <sup>1</sup>H NMR, o deuterated solvent residual peak= 2.05 ppm; ◇ water peak

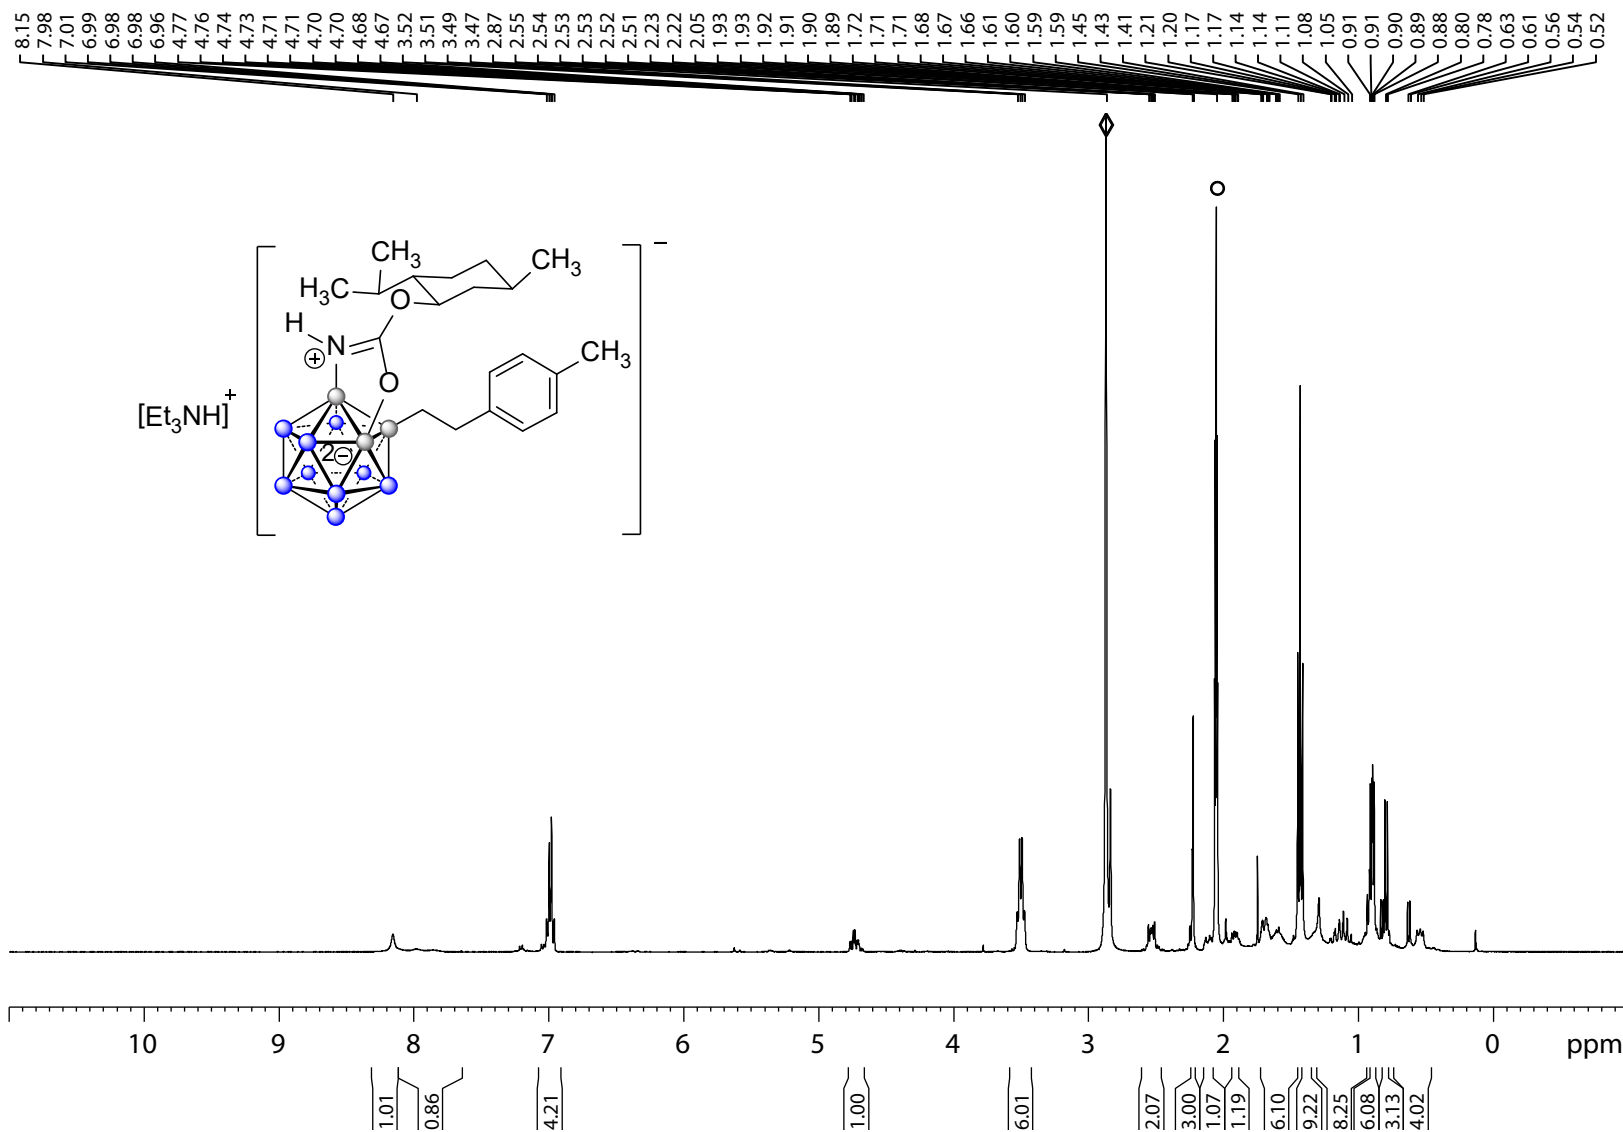

Current Data Parameters  
NAME 20190122-RV-B12M-4MeSTYR-I  
EXPNO 1  
PROCNO 1

F2 - Acquisition Parameters  
Date\_ 20190123  
Time\_ 4.26  
INSTRUM spect  
PROBHD 5 mm PABBO BB/  
PULPROG zg30  
TD 65536  
SOLVENT Acetone  
NS 64  
DS 2  
SWH 10000.000 Hz  
FIDRES 0.152588 Hz  
AQ 3.2767999 sec  
RG 193.34  
DW 50.000 usec  
DE 6.50 usec  
TE 296.3 K  
D1 1.00000000 sec  
TD0 1

===== CHANNEL f1 =====  
NUC1 1H  
P1 15.00 usec  
PLW1 12.50000000 W  
SFO1 400.1328009 MHz

F2 - Processing parameters  
SI 65536  
SF 400.1300069 MHz  
WDW EM  
SSB 0  
LB 0.30 Hz  
GB 0  
PC 1.00

20190122-B12M-4MeStyr 20 mg white solid  $[\text{Et}_3\text{NH}][\text{B}_{12}\text{H}_{10}\text{NHC}(\text{Menthy})\text{OCH}_2\text{CH}_2\text{C}_6\text{H}_4\text{Me}]$  dissolved in 0.6 mL acetone- $d_6^*$

400MHz  $^1\text{H}\{\text{B}\}$  NMR,  $\circ$  deuterated solvent residual peak= 2.05 ppm;  $\diamond$  water peak

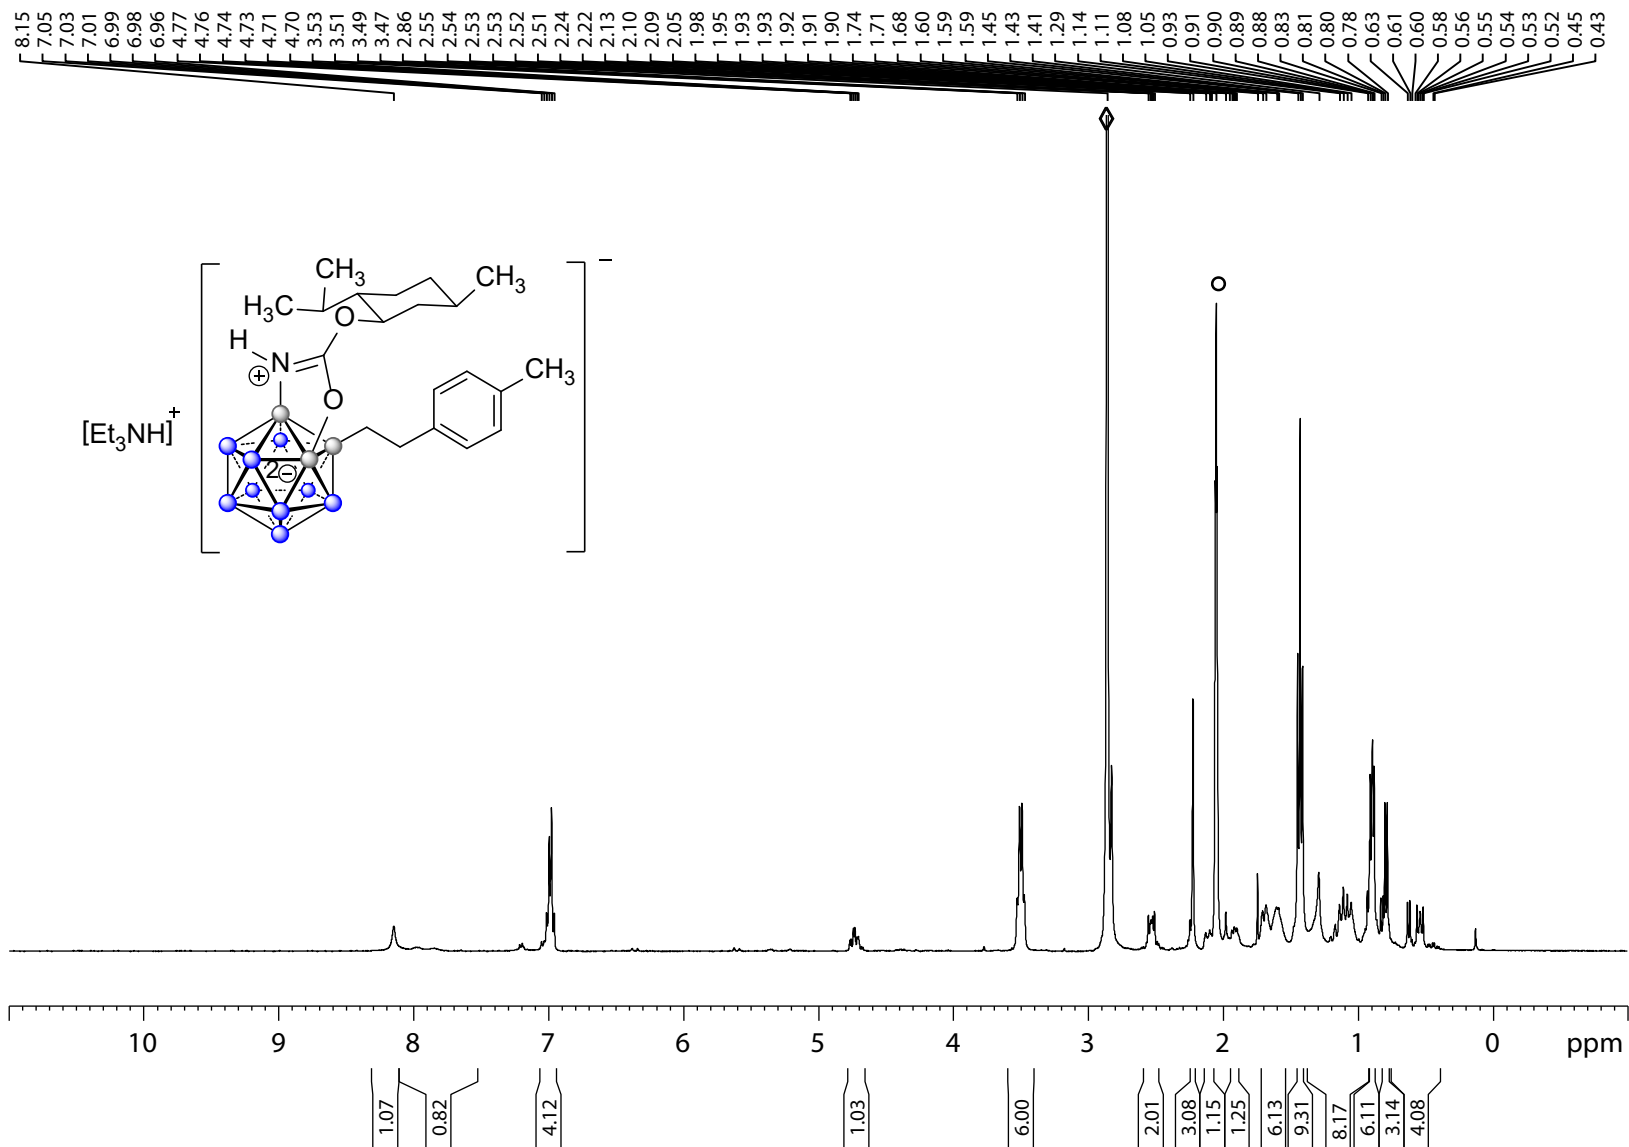

Current Data Parameters  
 NAME 20190122-RV-B12M-4MeSTYR-I  
 EXPNO 2  
 PROCNO 1

F2 - Acquisition Parameters  
 Date\_ 20190123  
 Time\_ 4.28  
 INSTRUM spect  
 PROBHD 5 mm PABBO BB/  
 PULPROG zgig30  
 TD 16384  
 SOLVENT Acetone  
 NS 16  
 DS 4  
 SWH 8012.820 Hz  
 FIDRES 0.489064 Hz  
 AQ 1.0223616 sec  
 RG 193.34  
 DW 62.400 usec  
 DE 6.50 usec  
 TE 296.5 K  
 D1 1.00000000 sec  
 D11 0.03000000 sec  
 TD0 1

===== CHANNEL f1 =====  
 NUC1 1H  
 P1 15.00 usec  
 PLW1 12.50000000 W  
 SFO1 400.1320007 MHz

===== CHANNEL f2 =====  
 CPDPRG[2] garp4  
 NUC2 11B  
 PCPD2 90.00 usec  
 PLW2 52.96599960 W  
 PLW12 0.64477998 W  
 SFO2 128.3776050 MHz

F2 - Processing parameters  
 SI 32768  
 SF 400.1300069 MHz  
 WDW EM  
 SSB 0  
 LB 1.00 Hz  
 GB 0  
 PC 1.40

20190725-B12M-4MeStyr 20 mg white solid  $[\text{Et}_3\text{NH}][\text{B}_{12}\text{H}_{10}\text{NHC}(\text{Menthyl})\text{OCH}_2\text{CH}_2\text{C}_6\text{H}_4\text{Me}]$  dissolved in 0.6 mL acetone- $d_6^*$

$^{11}\text{B}$  NMR 128 MHz

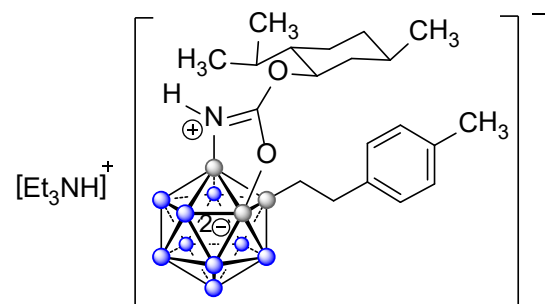

5.78  
-3.89  
-7.75  
-14.15  
-15.17  
-17.96  
-18.82  
-22.11  
-23.12  
-24.18

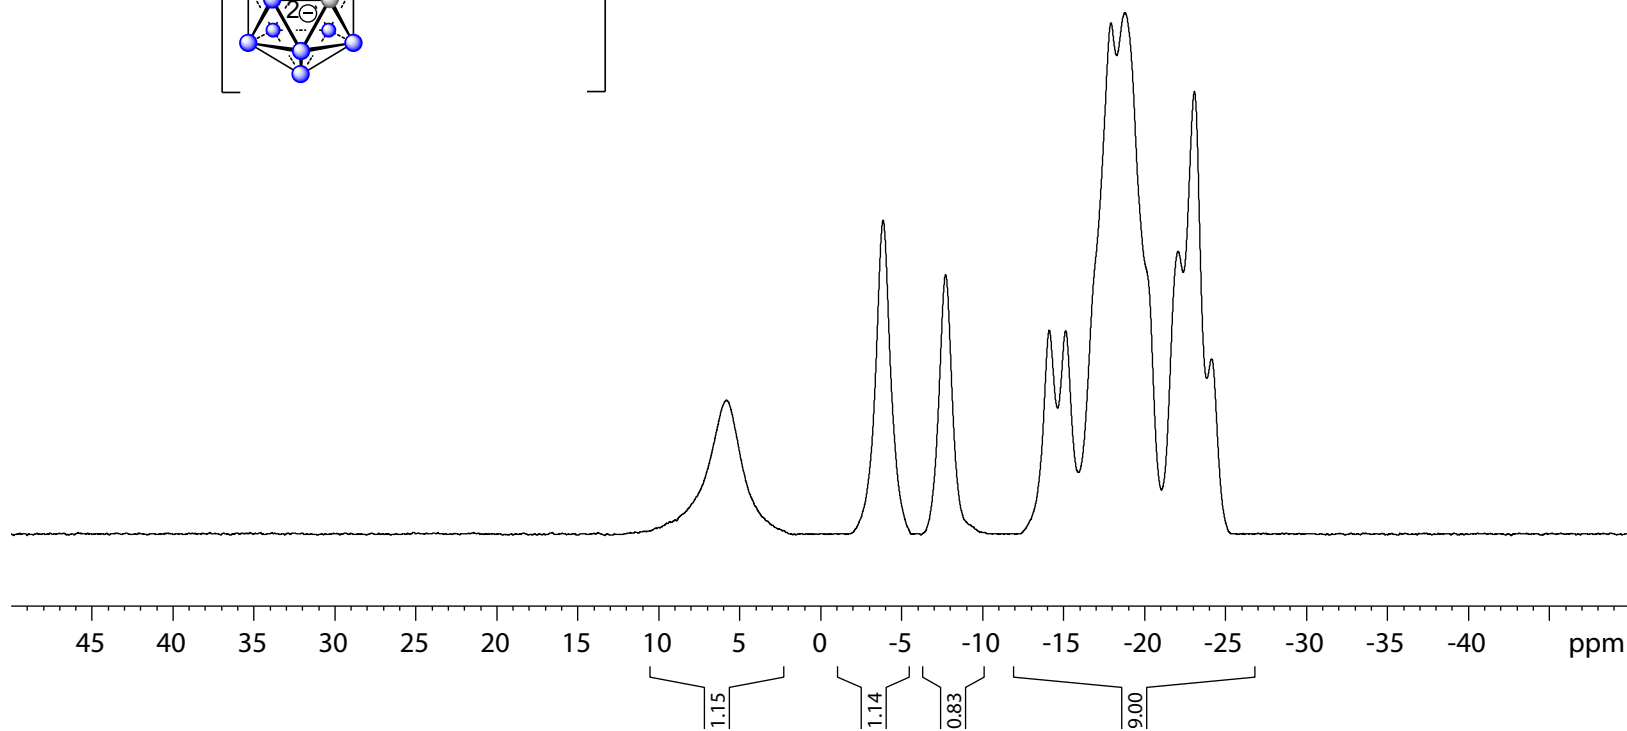

Current Data Parameters  
NAME 20190725-RV-B12M-4MeSTYR  
EXPNO 3  
PROCNO 1

F2 - Acquisition Parameters  
Date\_ 20190725  
Time 18.35  
INSTRUM spect  
PROBHD 5 mm PABBO BB/  
PULPROG zg  
TD 65536  
SOLVENT Acetone  
NS 128  
DS 4  
SWH 25510.203 Hz  
FIDRES 0.389255 Hz  
AQ 1.2845056 sec  
RG 193.34  
DW 19.600 usec  
DE 6.50 usec  
TE 295.1 K  
D1 1.00000000 sec  
TD0 1

==== CHANNEL f1 =====  
NUC1 11B  
P1 9.93 usec  
PLW1 52.96599960 W  
SFO1 128.3776052 MHz

F2 - Processing parameters  
SI 32768  
SF 128.3776050 MHz  
WDW EM  
SSB 0  
LB 10.00 Hz  
GB 0  
PC 1.40

20190725-B12M-4MeStyr 20 mg white solid  $[\text{Et}_3\text{NH}][\text{B}_{12}\text{H}_{10}\text{NHC}(\text{Menthyl})\text{OCH}_2\text{CH}_2\text{C}_6\text{H}_4\text{Me}]$  dissolved in 0.6 mL acetone- $d_6^*$

$^{11}\text{B}\{\text{H}\}$  NMR 128 MHz

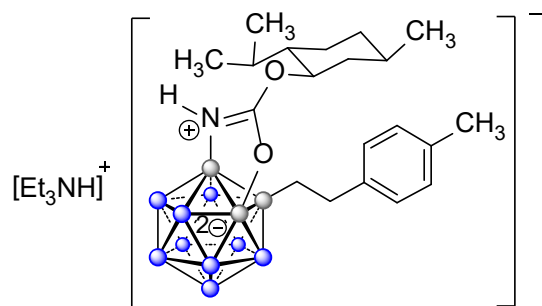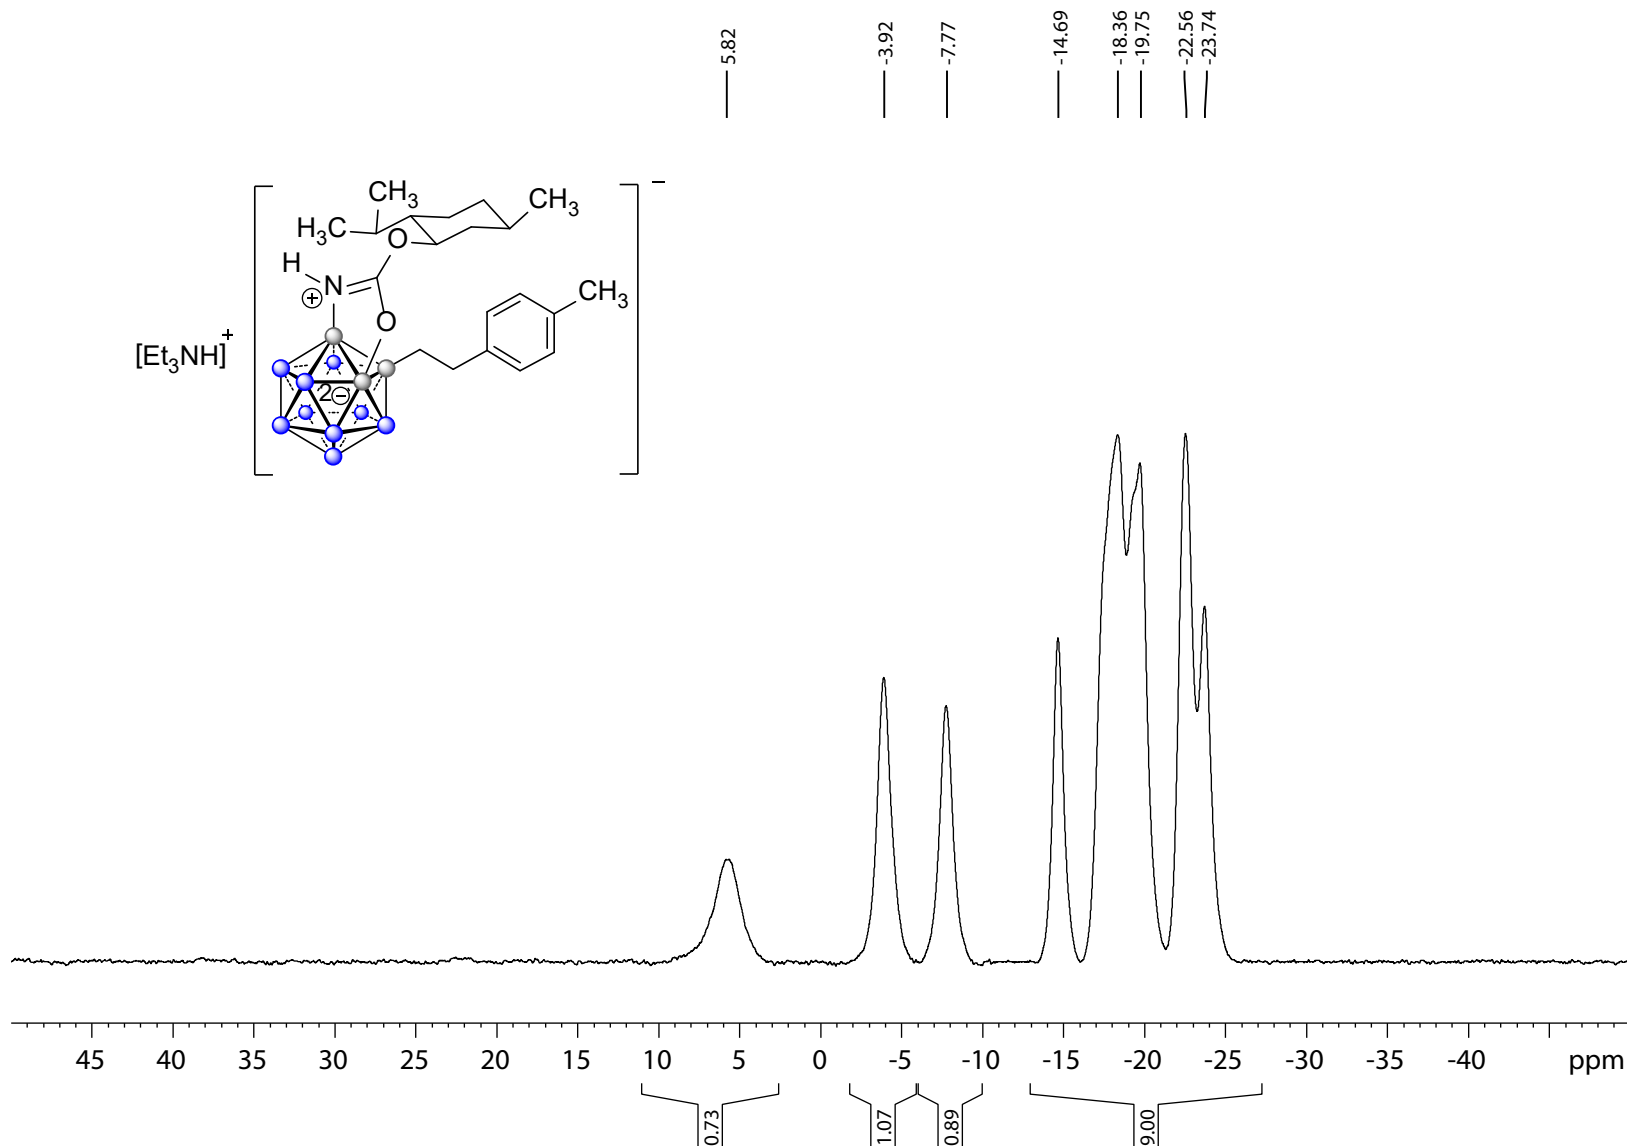

Current Data Parameters  
 NAME 20190725-RV-B12M-4MeSTYR  
 EXPNO 4  
 PROCNO 1

F2 - Acquisition Parameters  
 Date\_ 20190725  
 Time 18.42  
 INSTRUM spect  
 PROBHD 5 mm PABBO BB/  
 PULPROG zgpg30  
 TD 65536  
 SOLVENT Acetone  
 NS 128  
 DS 4  
 SWH 25510.203 Hz  
 FIDRES 0.389255 Hz  
 AQ 1.2845056 sec  
 RG 193.34  
 DW 19.600 usec  
 DE 6.50 usec  
 TE 295.7 K  
 D1 1.00000000 sec  
 D11 0.03000000 sec  
 TD0 1

===== CHANNEL f1 =====  
 NUC1 11B  
 P1 9.93 usec  
 PLW1 52.96599960 W  
 SFO1 128.3776050 MHz

===== CHANNEL f2 =====  
 CPDPRG[2] waltz16  
 NUC2 1H  
 PCPD2 80.00 usec  
 PLW2 12.50000000 W  
 PLW12 0.43945000 W  
 PLW13 0.28125000 W  
 SFO2 400.1320007 MHz

F2 - Processing parameters  
 SI 32768  
 SF 128.3776050 MHz  
 WDW EM  
 SSB 0  
 LB 10.00 Hz  
 GB 0  
 PC 1.40

20190725-B12M-4MeStyr 20 mg white solid [Et<sub>3</sub>NH][B<sub>12</sub>H<sub>10</sub>NHC(Menthyl)OCH<sub>2</sub>CH<sub>2</sub>C<sub>6</sub>H<sub>4</sub>Me] dissolved in 0.6 mL acetone-d<sub>6</sub>\*

<sup>13</sup>C{<sup>1</sup>H} NMR 100 MHz

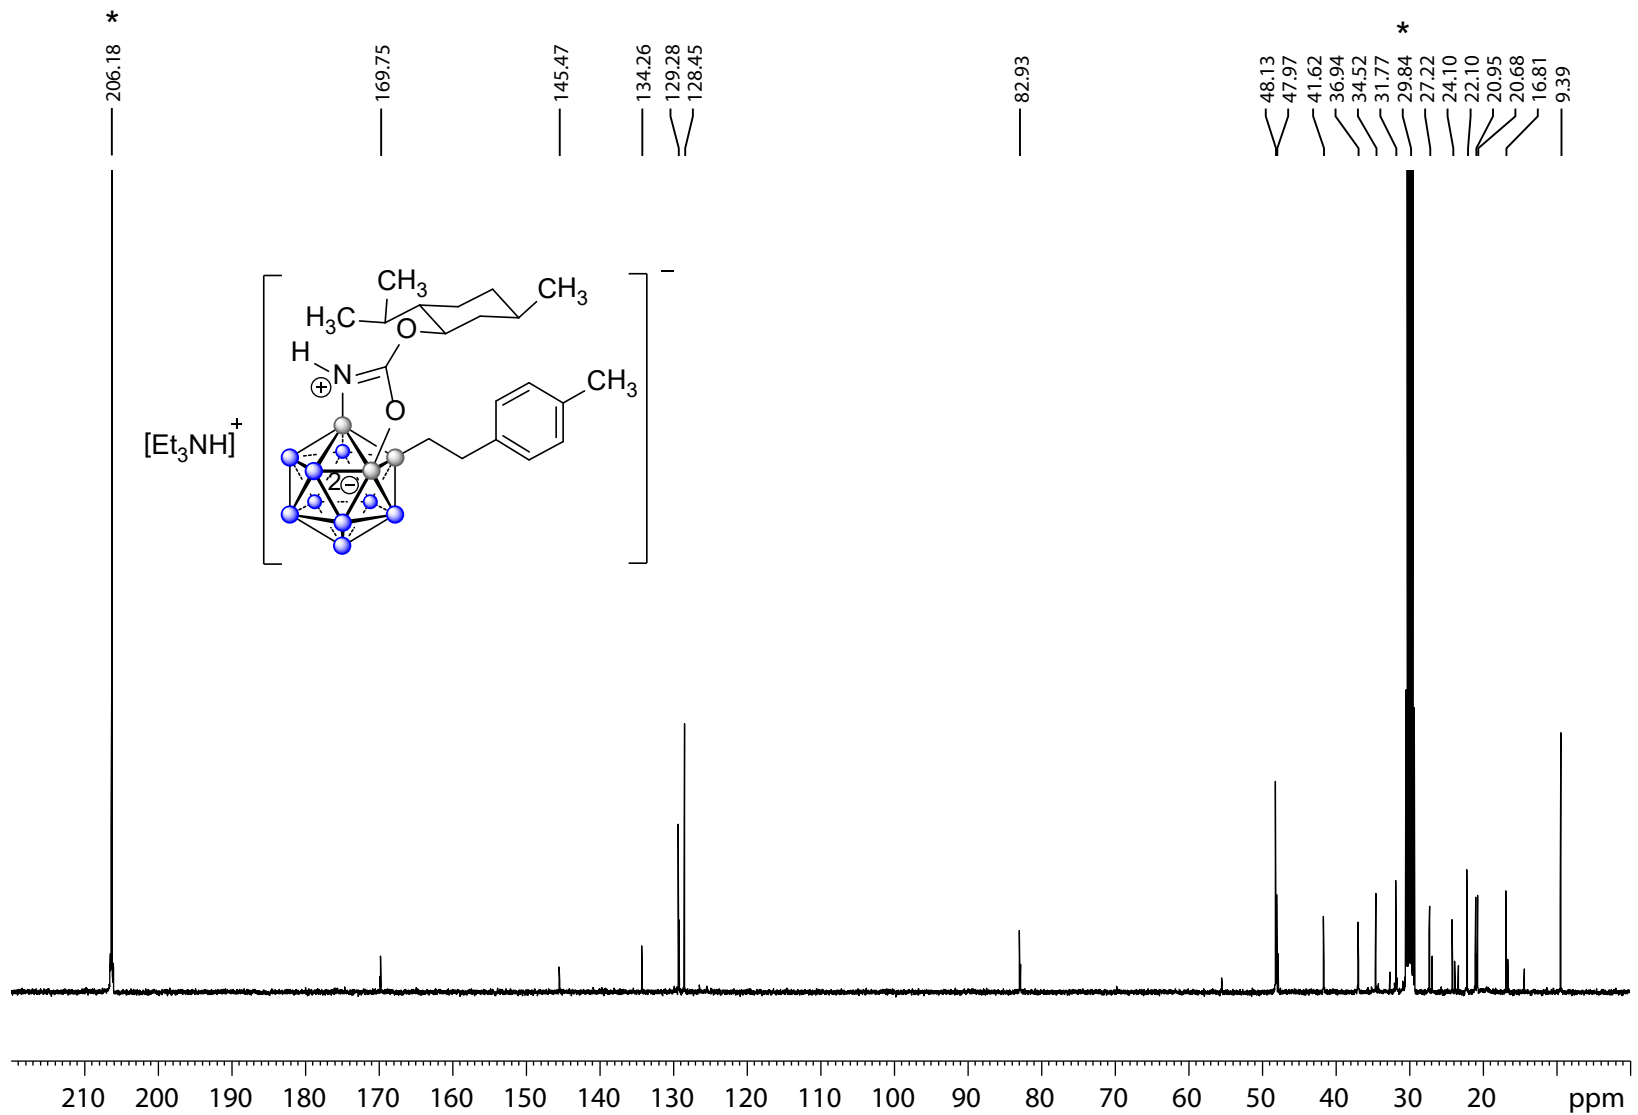

Current Data Parameters  
 NAME 20190725-RV-B12M-4MeSTYR  
 EXPNO 5  
 PROCNO 1

F2 - Acquisition Parameters  
 Date\_ 20190725  
 Time\_ 20.14  
 INSTRUM spect  
 PROBHD 5 mm PABBO BB/  
 PULPROG zgpg30  
 TD 65536  
 SOLVENT Acetone  
 NS 2048  
 DS 4  
 SWH 29761.904 Hz  
 FIDRES 0.454131 Hz  
 AQ 1.1010048 sec  
 RG 193.34  
 DW 16.800 usec  
 DE 6.50 usec  
 TE 296.0 K  
 D1 1.50000000 sec  
 D11 0.03000000 sec  
 TD0 1

===== CHANNEL f1 =====  
 NUC1 13C  
 P1 10.00 usec  
 PLW1 53.00000000 W  
 SFO1 100.6228293 MHz

===== CHANNEL f2 =====  
 CPDPRG[2] waltz16  
 NUC2 1H  
 PCPD2 80.00 usec  
 PLW2 12.50000000 W  
 PLW12 0.43945000 W  
 PLW13 0.28125000 W  
 SFO2 400.1316005 MHz

F2 - Processing parameters  
 SI 32768  
 SF 100.6126842 MHz  
 WDW EM  
 SSB 0  
 LB 1.00 Hz  
 GB 0  
 PC 1.40

20190725-B12M-4MeStyr 20 mg white solid  $[\text{Et}_3\text{NH}][\text{B}_{12}\text{H}_{10}\text{NHC}(\text{Menthyl})\text{OCH}_2\text{CH}_2\text{C}_6\text{H}_4\text{Me}]$  dissolved in 0.6 mL acetone- $d_6^*$

$^{13}\text{CDEPT}$  NMR 100 MHz

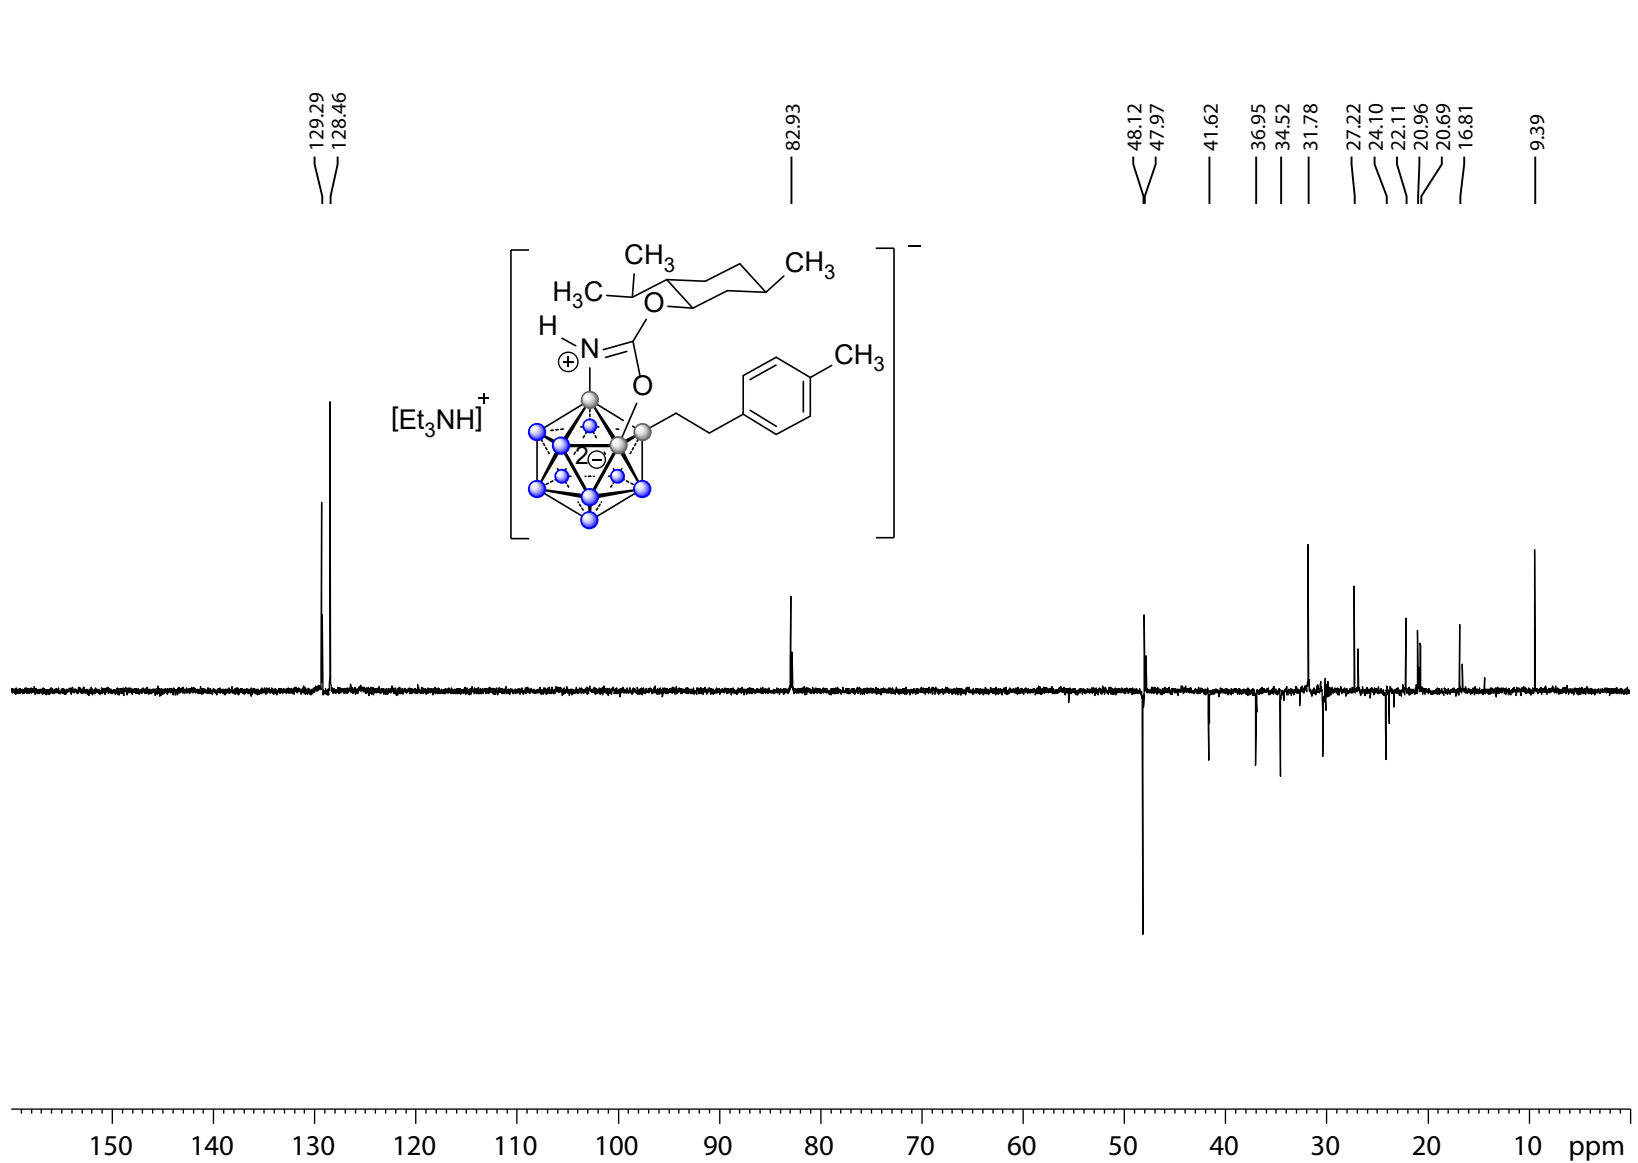

Current Data Parameters  
 NAME 20190725-RV-B12M-4MeSTYR  
 EXPNO 6  
 PROCNO 1

F2 - Acquisition Parameters  
 Date\_ 20190725  
 Time\_ 20.42  
 INSTRUM spect  
 PROBHD 5 mm PABBO BB/  
 PULPROG dept135  
 TD 65536  
 SOLVENT Acetone  
 NS 512  
 DS 4  
 SWH 29296.875 Hz  
 FIDRES 0.447035 Hz  
 AQ 1.1184810 sec  
 RG 193.34  
 DW 17.067 usec  
 DE 6.50 usec  
 TE 295.4 K  
 CNST2 145.0000000  
 D1 2.00000000 sec  
 D2 0.00344828 sec  
 D12 0.00002000 sec  
 TD0 1

==== CHANNEL f1 =====  
 NUC1 13C  
 P1 10.00 usec  
 P2 20.00 usec  
 PLW1 53.00000000 W  
 SFO1 100.6228293 MHz

==== CHANNEL f2 =====  
 CPDPRG[2] waltz16  
 NUC2 1H  
 P3 15.00 usec  
 P4 30.00 usec  
 PCPD2 80.00 usec  
 PLW2 12.50000000 W  
 PLW12 0.43945000 W  
 SFO2 400.1316005 MHz

F2 - Processing parameters  
 SI 32768  
 SF 100.6126836 MHz  
 WDW EM  
 SSB 0  
 LB 1.00 Hz  
 GB 0  
 PC 4.00

20190725-B12M-4MeStyr 20 mg white solid [Et<sub>3</sub>NH][B<sub>12</sub>H<sub>10</sub>NHC(Menthyl)OCH<sub>2</sub>CH<sub>2</sub>C<sub>6</sub>H<sub>4</sub>Me] dissolved in 0.6 mL acetone-d<sub>6</sub>\*

<sup>1</sup>H - <sup>1</sup>H COSY NMR

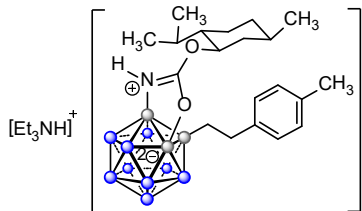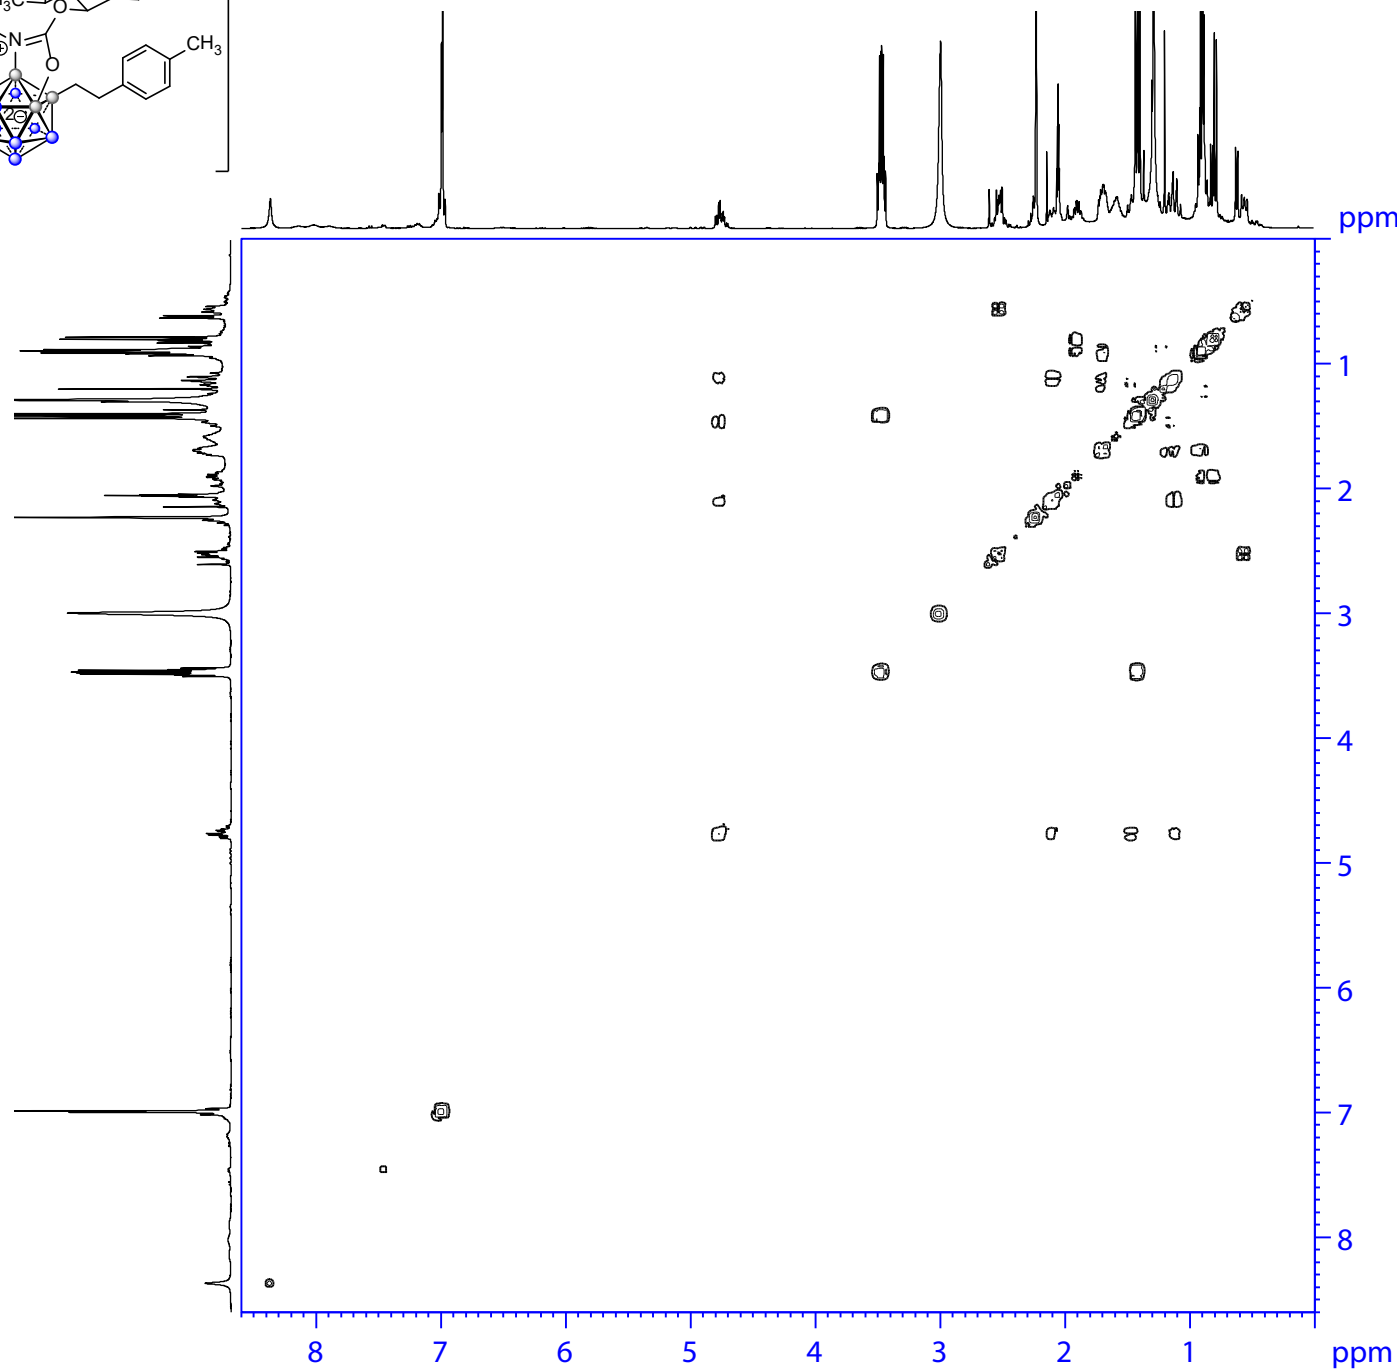

Current Data Parameters  
 NAME 20190725-RV-B12M-4MeSTYR  
 EXPNO 8  
 PROCNO 1

F2 - Acquisition Parameters  
 Date\_ 20190725  
 Time\_ 20.58  
 INSTRUM spect  
 PROBHD 5 mm PABBO BB/  
 PULPROG cosygpppqf  
 TD 2048  
 SOLVENT Acetone  
 NS 2  
 DS 8  
 SWH 5341.880 Hz  
 FIDRES 2.608340 Hz  
 AQ 0.1916928 sec  
 RG 107.6  
 DW 93.600 usec  
 DE 6.50 usec  
 TE 294.9 K  
 D0 0.0000300 sec  
 D1 2.0000000 sec  
 D11 0.0300000 sec  
 D12 0.0000200 sec  
 D13 0.0000040 sec  
 D16 0.0002000 sec  
 INO 0.00018720 sec

==== CHANNEL f1 =====  
 NUC1 1H  
 P0 15.00 usec  
 P1 15.00 usec  
 P17 2500.00 usec  
 PLW1 12.5000000 W  
 PLW10 4.16050005 W  
 SFO1 400.1324057 MHz

===== GRADIENT CHANNEL =====  
 GPNAM[1] SMSQ10.100  
 GPZ1 10.00 %  
 P16 1000.00 usec

F1 - Acquisition parameters  
 TD 128  
 SFO1 400.1324 MHz  
 FIDRES 83.466881 Hz  
 SW 13.350 ppm  
 FMODE QF

F2 - Processing parameters  
 SI 1024  
 SF 400.1300073 MHz  
 WDW QSINE  
 SSB 0  
 LB 0 Hz  
 GB 0  
 PC 1.40

F1 - Processing parameters  
 SI 1024  
 MC2 QF  
 SF 400.1300074 MHz  
 WDW QSINE  
 SSB 0  
 LB 0 Hz  
 GB 0

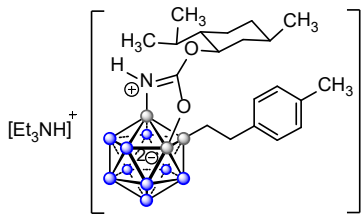

<sup>1</sup>H - <sup>13</sup>C HSQC NMR

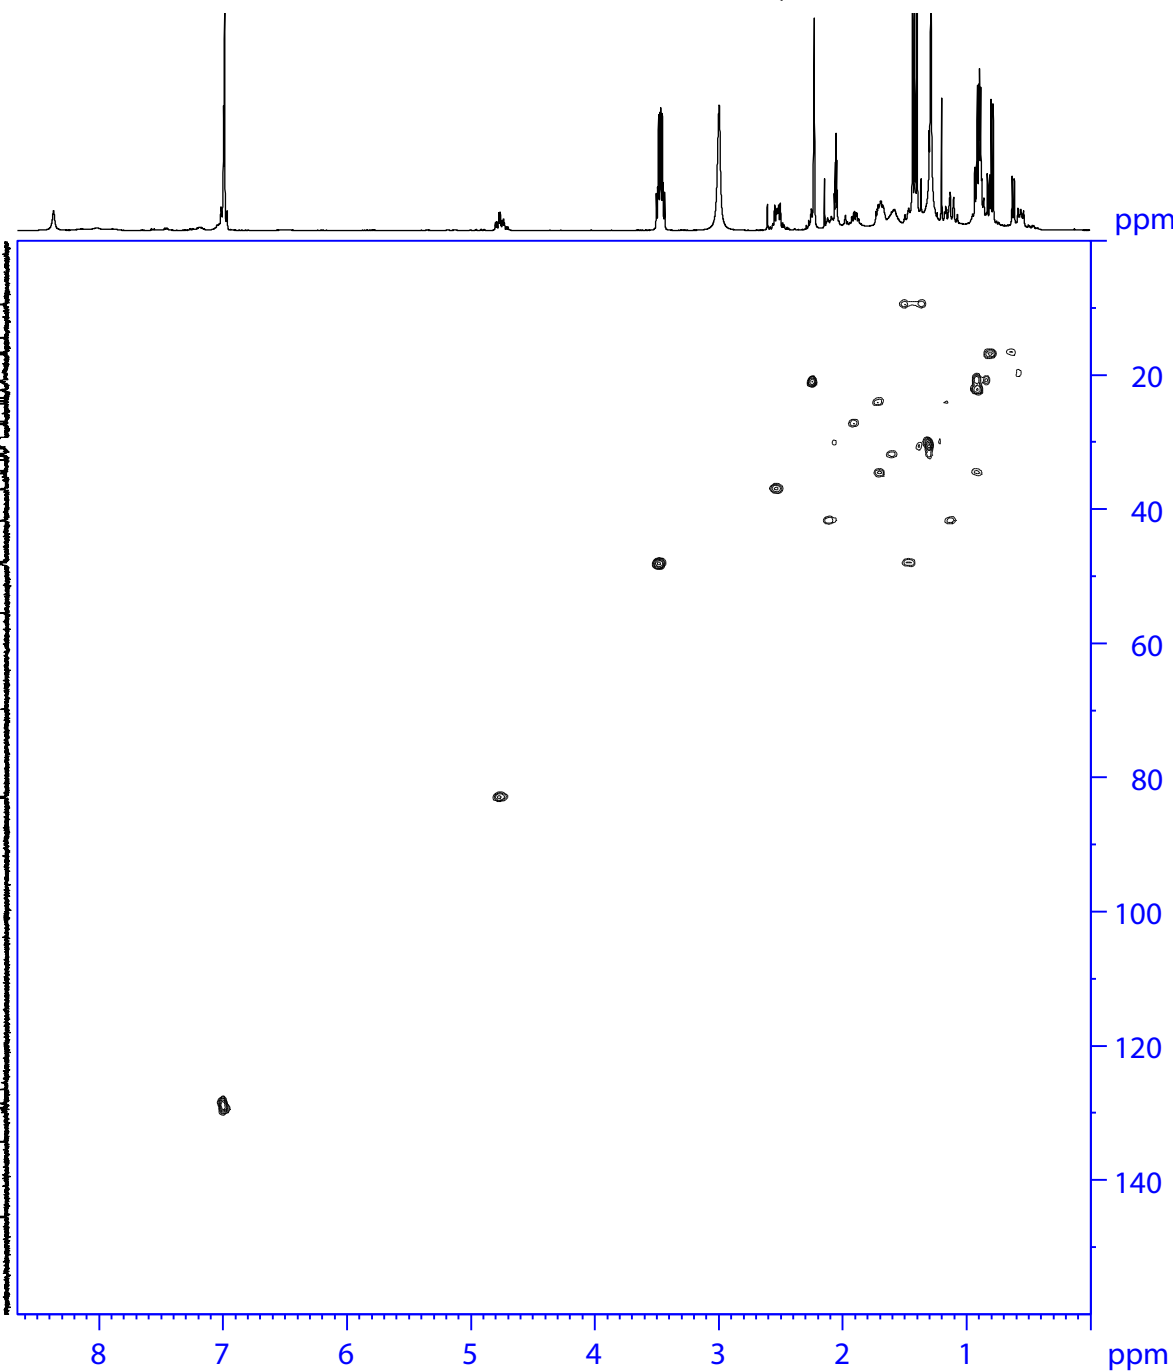

Current Data Parameters  
 NAME 20190725-RV-B12M-4MeSTYR  
 EXPNO 7  
 PROCNO 1

F2 - Acquisition Parameters  
 Date\_ 20190725  
 Time 20.44  
 INSTRUM spect  
 PROBHD 5 mm PABBO BB/  
 PULPROG hsqcetgps12  
 TD 1024  
 SOLVENT Acetone  
 NS 2  
 DS 16  
 SWH 6009.615 Hz  
 FIDRES 5.868765 Hz  
 AQ 0.0851968 sec  
 RG 193.34  
 DW 83.200 usec  
 DE 6.50 usec  
 TE 295.3 K  
 CNST2 145.0000000  
 D0 0.0000300 sec  
 D1 1.500000000 sec  
 D4 0.00172414 sec  
 D11 0.03000000 sec  
 D16 0.00020000 sec  
 D24 0.00086207 sec  
 INO 0.00001990 sec  
 ZGPGTNS

===== CHANNEL f1 =====  
 NUC1 1H  
 P1 15.00 usec  
 P2 30.00 usec  
 P28 1000.00 usec  
 PLW1 12.50000000 W  
 SFO1 400.1328009 MHz

===== CHANNEL f2 =====  
 CPDPRG[2] garp  
 NUC2 13C  
 P3 10.00 usec  
 P4 20.00 usec  
 PCPD2 70.00 usec  
 PLW2 53.00000000 W  
 PLW12 1.08159995 W  
 SFO2 100.6238364 MHz

===== GRADIENT CHANNEL =====  
 GPNAM[1] SMSQ10.100  
 GPNAM[2] SMSQ10.100  
 GPNAM[3] SMSQ10.100  
 GPNAM[4] SMSQ10.100  
 GPZ1 80.00 %  
 GPZ2 20.10 %  
 GPZ3 11.00 %  
 GPZ4 -5.00 %  
 P16 1000.00 usec  
 P19 600.00 usec

F1 - Acquisition parameters  
 TD 256  
 SFO1 100.6238 MHz  
 FIDRES 196.524048 Hz  
 SW 249.991 ppm  
 FhMODE Echo-Antiecho

F2 - Processing parameters  
 SI 1024  
 SF 400.1300034 MHz  
 WDW QSINE  
 SSB 2  
 LB 0 Hz  
 GB 0  
 PC 1.40

F1 - Processing parameters  
 SI 1024  
 MC2 echo-antiecho  
 SF 100.6126680 MHz  
 WDW QSINE  
 SSB 2  
 LB 0 Hz  
 GB 0



20190128-B12M-4COOMeStyr 20 mg white solid  $[\text{Et}_3\text{NH}][\text{B}_{12}\text{H}_{10}\text{NHC}(\text{Menthyl})\text{OCH}_2\text{CH}_2\text{C}_6\text{H}_4\text{COOMe}]$  dissolved in 0.6 mL acetone- $d_6^*$

400MHz  $^1\text{H}$  NMR, o deuterated solvent residual peak= 2.05 ppm;  $\diamond$  water peak

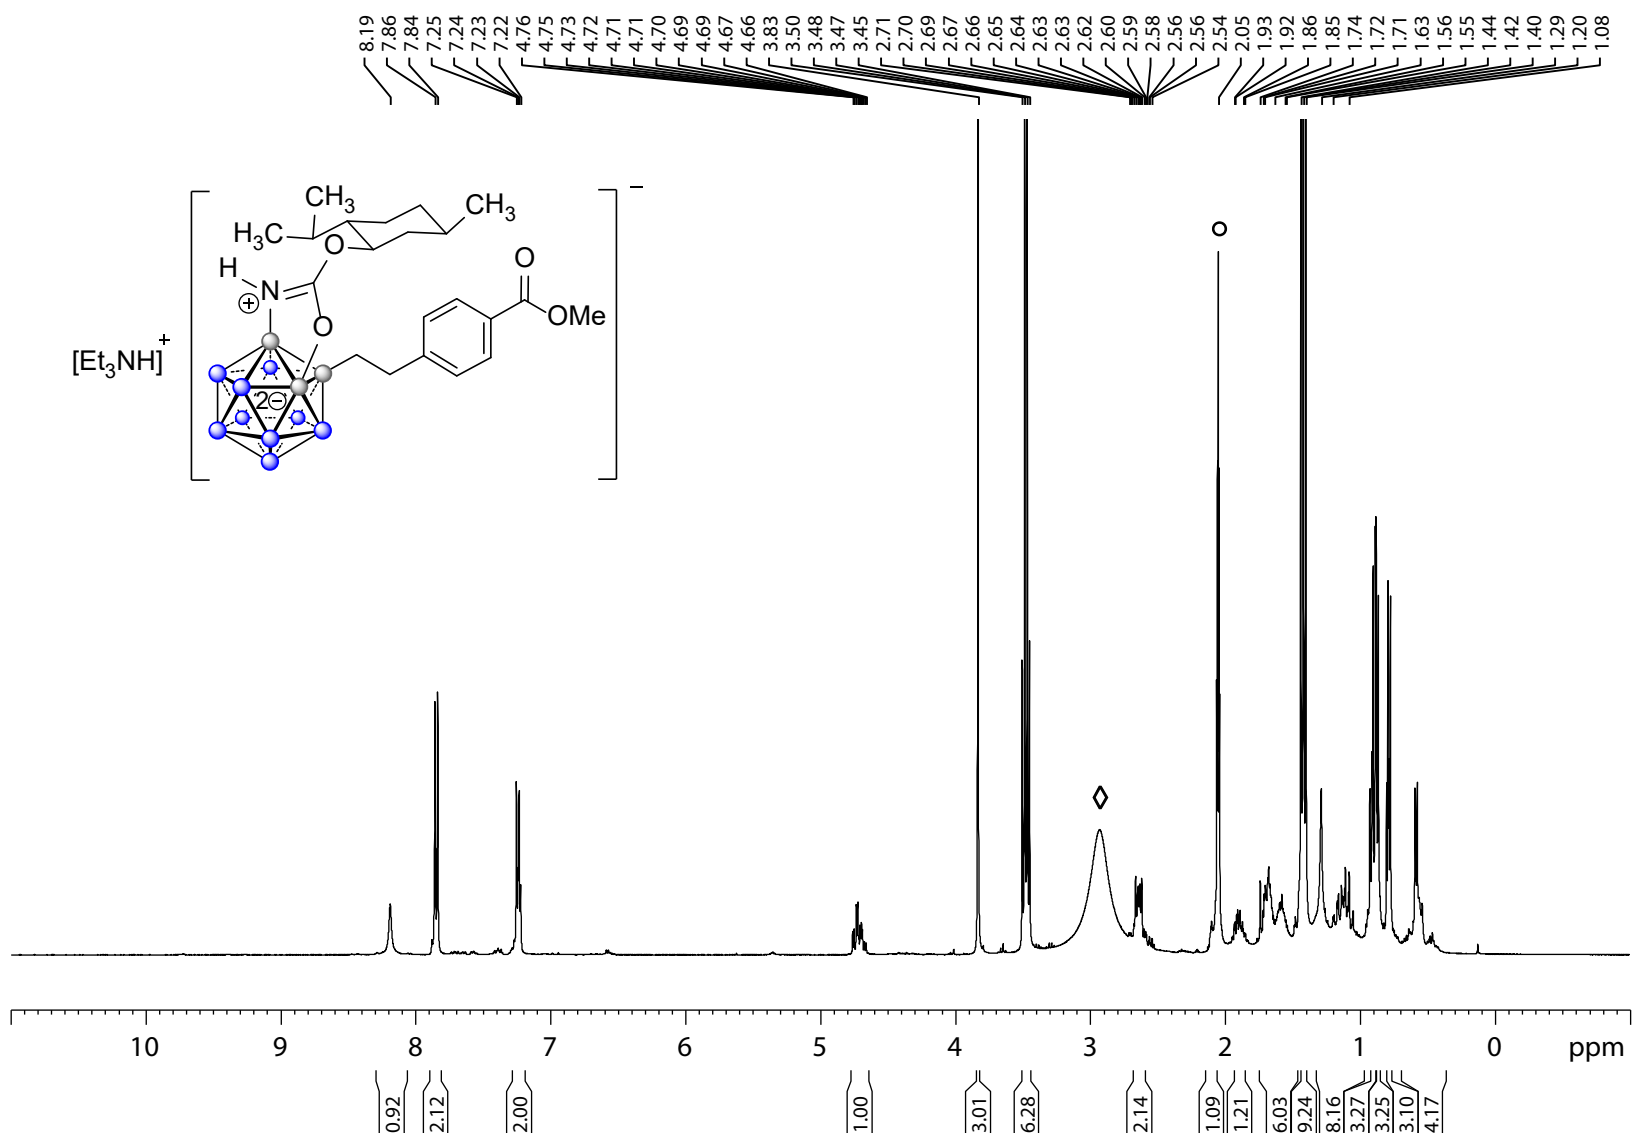

Current Data Parameters  
 NAME 20190128-RV-B12M-4COMe-STYR-II  
 EXPNO 1  
 PROCNO 1

F2 - Acquisition Parameters  
 Date\_ 20190129  
 Time 15.29  
 INSTRUM spect  
 PROBHD 5 mm PABBO BB/  
 PULPROG zg30  
 TD 65536  
 SOLVENT Acetone  
 NS 64  
 DS 2  
 SWH 10000.000 Hz  
 FIDRES 0.152588 Hz  
 AQ 3.2767999 sec  
 RG 124.48  
 DW 50.000 usec  
 DE 6.50 usec  
 TE 296.0 K  
 D1 1.00000000 sec  
 TD0 1

==== CHANNEL f1 =====  
 NUC1  $^1\text{H}$   
 P1 15.00 usec  
 PLW1 12.5000000 W  
 SFO1 400.1328009 MHz

F2 - Processing parameters  
 SI 65536  
 SF 400.1300069 MHz  
 WDW EM  
 SSB 0  
 LB 0.30 Hz  
 GB 0  
 PC 1.00

20190128-B12M-4COOMeStyr 20 mg white solid  $[\text{Et}_3\text{NH}][\text{B}_{12}\text{H}_{10}\text{NHC}(\text{Menthyl})\text{OCH}_2\text{CH}_2\text{C}_6\text{H}_4\text{COOMe}]$  dissolved in 0.6 mL acetone- $d_6^*$

400MHz  $^1\text{H}\{\text{B}\}$  NMR,  $\circ$  deuterated solvent residual peak= 2.05 ppm;  $\diamond$  water peak

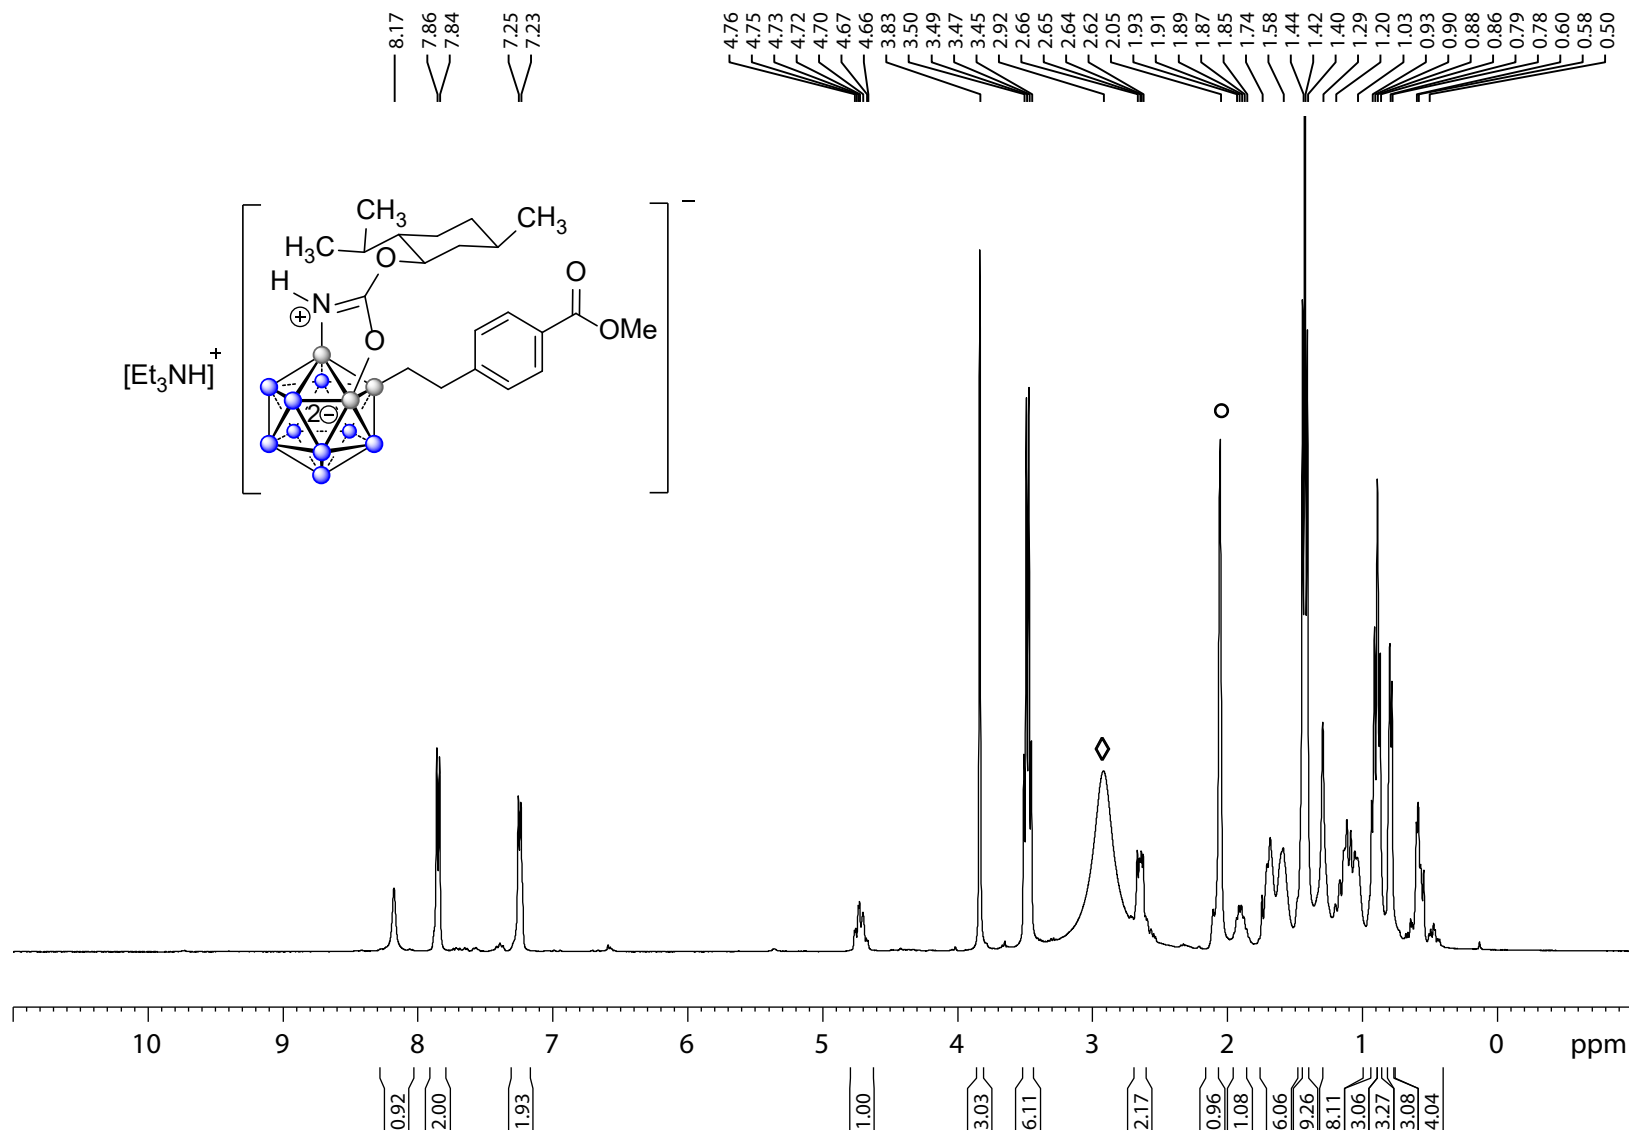

Current Data Parameters  
 NAME 20190128-RV-B12M-4COMe-STYR-II  
 EXPNO 2  
 PROCNO 1

F2 - Acquisition Parameters  
 Date\_ 20190129  
 Time\_ 15.32  
 INSTRUM spect  
 PROBHD 5 mm PABBO BB/  
 PULPROG zgig30  
 TD 16384  
 SOLVENT Acetone  
 NS 64  
 DS 4  
 SWH 8012.820 Hz  
 FIDRES 0.489064 Hz  
 AQ 1.0223616 sec  
 RG 107.6  
 DW 62.400 usec  
 DE 6.50 usec  
 TE 296.3 K  
 D1 1.00000000 sec  
 D11 0.03000000 sec  
 TD0 1

==== CHANNEL f1 =====  
 NUC1 1H  
 P1 15.00 usec  
 PLW1 12.50000000 W  
 SFO1 400.1320007 MHz

==== CHANNEL f2 =====  
 CPDPRG[2] garp4  
 NUC2 11B  
 PCPD2 90.00 usec  
 PLW2 52.96599960 W  
 PLW12 0.64477998 W  
 SFO2 128.3776050 MHz

F2 - Processing parameters  
 SI 32768  
 SF 400.1300068 MHz  
 WDW EM  
 SSB 0  
 LB 1.00 Hz  
 GB 0  
 PC 1.40

20190128-B12M-4COOMeStyr 20 mg white solid  $[\text{Et}_3\text{NH}][\text{B}_{12}\text{H}_{10}\text{NHC}(\text{Menthyl})\text{OCH}_2\text{CH}_2\text{C}_6\text{H}_4\text{COOMe}]$  dissolved in 0.6 mL acetone- $d_6^*$

$^{11}\text{B}$  NMR 128 MHz

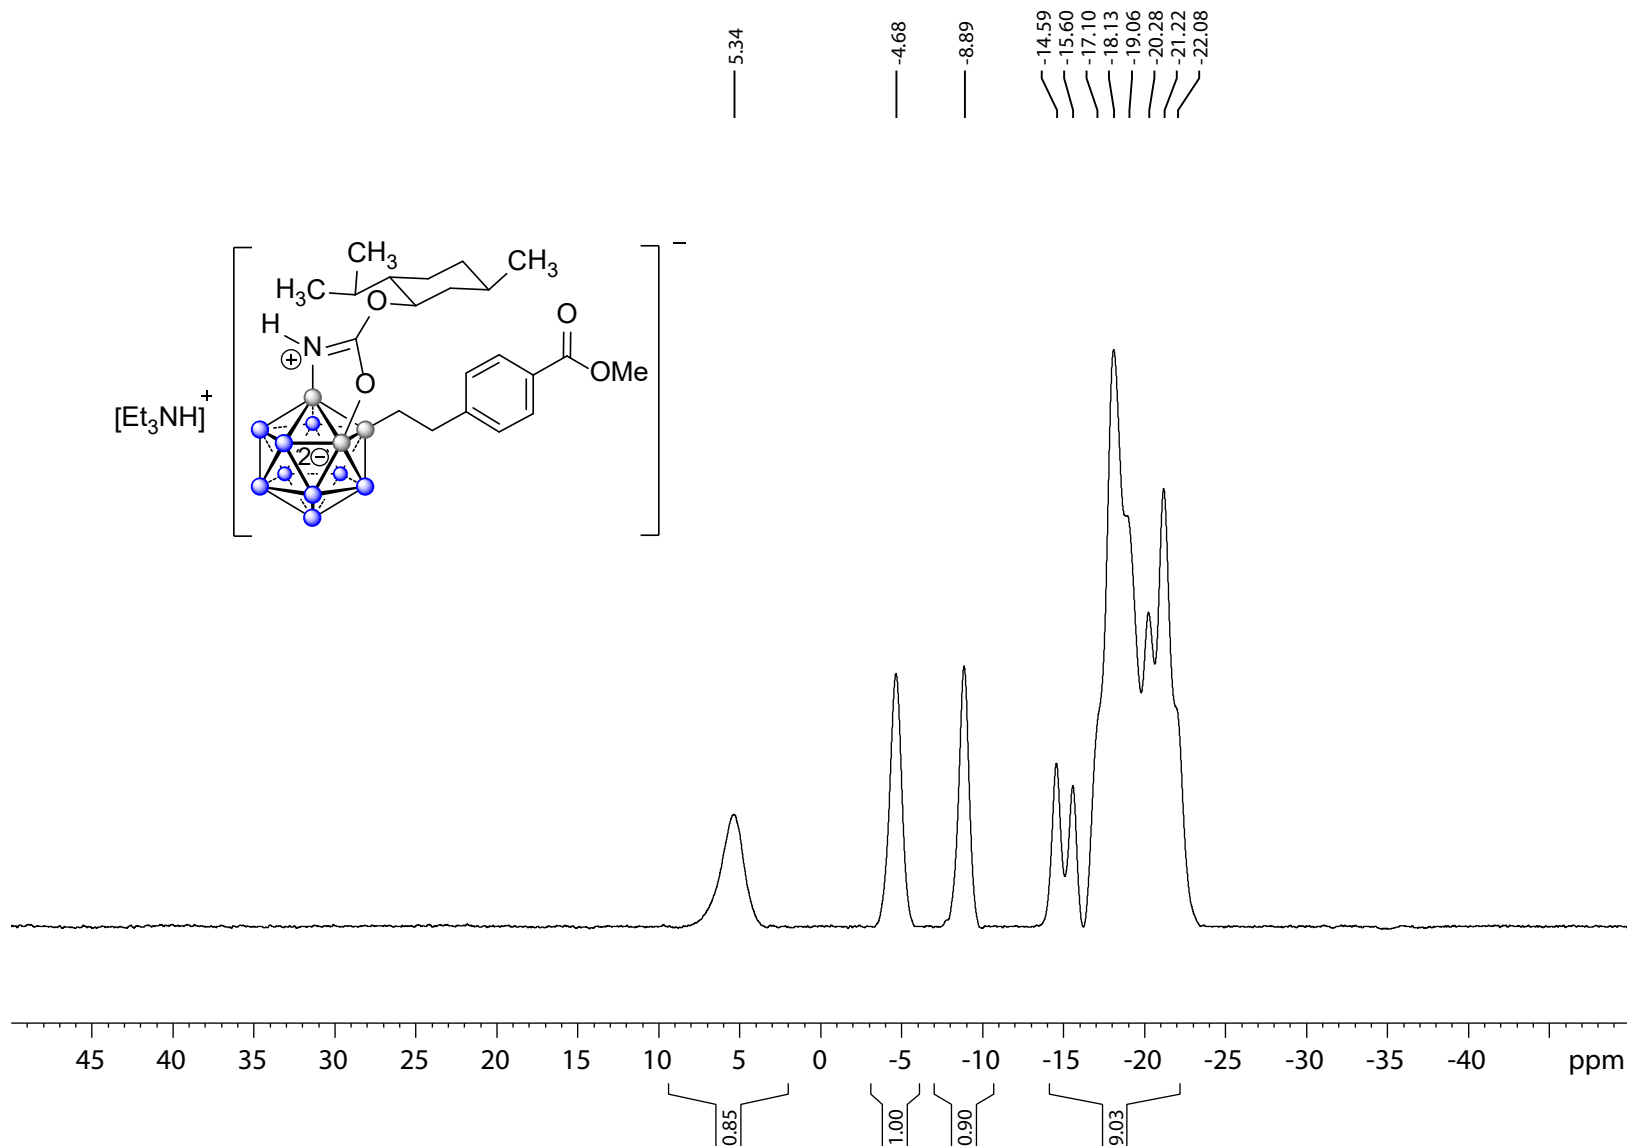

Current Data Parameters  
NAME 20190128-RV-B12M-4COMe-STYR-II  
EXPNO 3  
PROCNO 1

F2 - Acquisition Parameters  
Date\_ 20190129  
Time\_ 15.53  
INSTRUM spect  
PROBHD 5 mm PABBO BB/  
PULPROG zg  
TD 65536  
SOLVENT Acetone  
NS 512  
DS 4  
SWH 25510.203 Hz  
FIDRES 0.389255 Hz  
AQ 1.2845056 sec  
RG 193.34  
DW 19.600 usec  
DE 6.50 usec  
TE 296.8 K  
D1 1.00000000 sec  
TD0 1

==== CHANNEL f1 =====  
NUC1 11B  
P1 9.93 usec  
PLW1 52.96599960 W  
SFO1 128.3776052 MHz

F2 - Processing parameters  
SI 32768  
SF 128.3776050 MHz  
WDW EM  
SSB 0  
LB 10.00 Hz  
GB 0  
PC 1.40

20190128-B12M-4COOMeStyr 20 mg white solid  $[\text{Et}_3\text{NH}][\text{B}_{12}\text{H}_{10}\text{NHC}(\text{Menthyl})\text{OCH}_2\text{CH}_2\text{C}_6\text{H}_4\text{COOMe}]$  dissolved in 0.6 mL acetone- $d_6^*$

$^{11}\text{B}\{^1\text{H}\}$  NMR 128 MHz

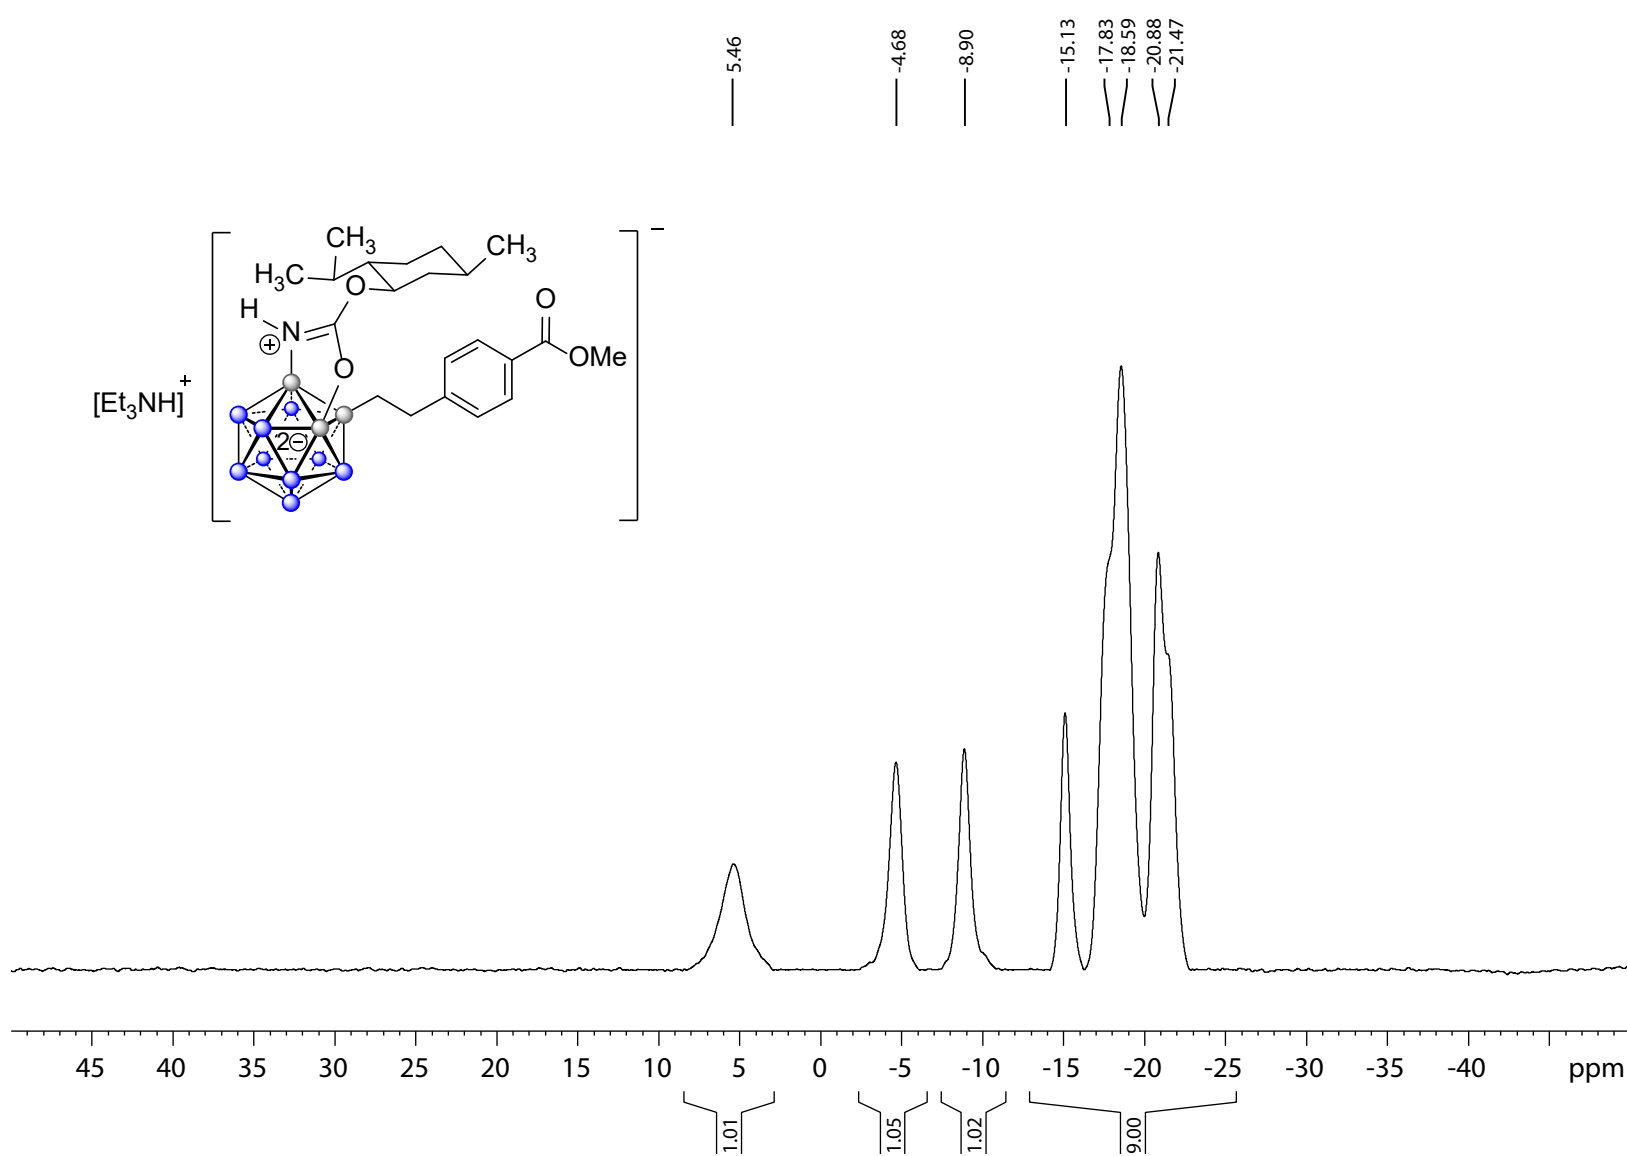

Current Data Parameters  
 NAME 20190128-RV-B12M-4COMe-STYR-II  
 EXPNO 4  
 PROCNO 1

F2 - Acquisition Parameters  
 Date\_ 20190129  
 Time 16.14  
 INSTRUM spect  
 PROBHD 5 mm PABBO BB/  
 PULPROG zgpg30  
 TD 65536  
 SOLVENT Acetone  
 NS 512  
 DS 4  
 SWH 25510.203 Hz  
 FIDRES 0.389255 Hz  
 AQ 1.2845056 sec  
 RG 193.34  
 DW 19.600 usec  
 DE 6.50 usec  
 TE 296.7 K  
 D1 1.00000000 sec  
 D11 0.03000000 sec  
 TDO 1

===== CHANNEL f1 =====  
 NUC1 11B  
 P1 9.93 usec  
 PLW1 52.96599960 W  
 SFO1 128.3776050 MHz

===== CHANNEL f2 =====  
 CPDPRG[2] waltz16  
 NUC2 1H  
 PCPD2 80.00 usec  
 PLW2 12.50000000 W  
 PLW12 0.43945000 W  
 PLW13 0.28125000 W  
 SFO2 400.1320007 MHz

F2 - Processing parameters  
 SI 32768  
 SF 128.3776050 MHz  
 WDW EM  
 SSB 0  
 LB 20.00 Hz  
 GB 0  
 PC 1.40

20190128-B12M-4COOMeStyr 20 mg white solid [Et<sub>3</sub>NH][B<sub>12</sub>H<sub>10</sub>NHC(Menthyl)OCH<sub>2</sub>CH<sub>2</sub>C<sub>6</sub>H<sub>4</sub>COOMe] dissolved in 0.6 mL acetone-d<sub>6</sub>\*

<sup>13</sup>C{<sup>1</sup>H} NMR 100 MHz

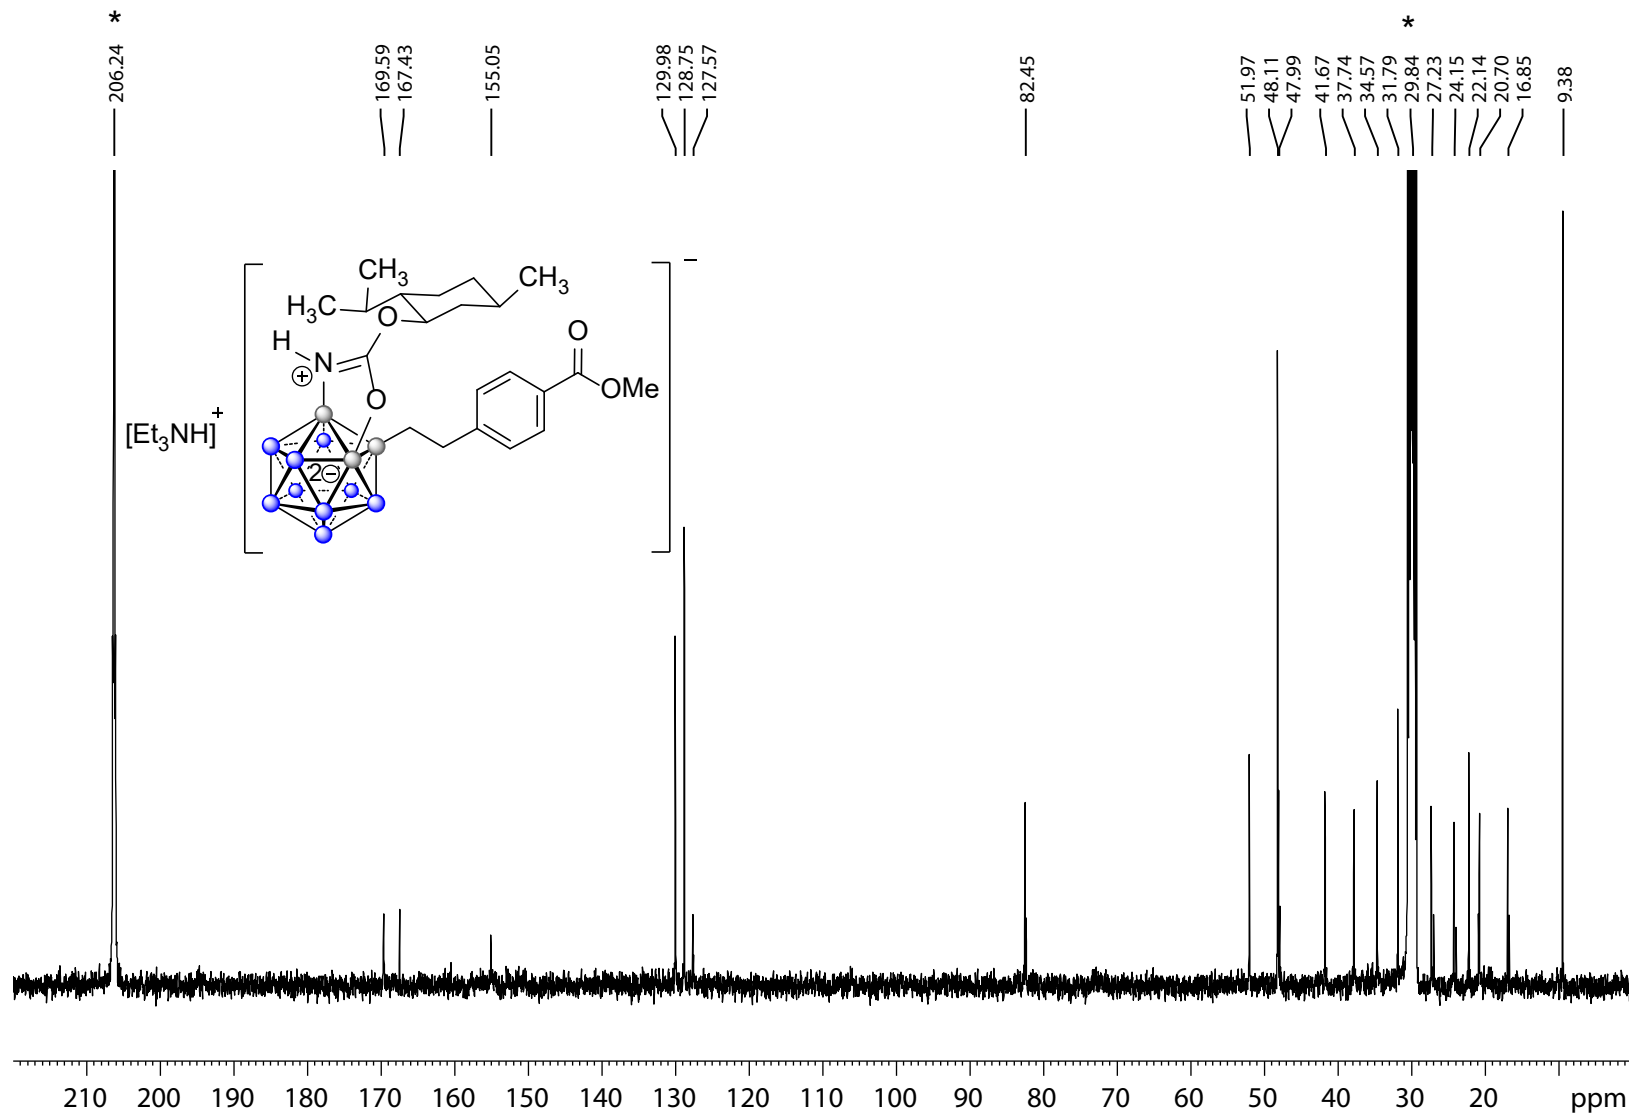

Current Data Parameters  
 NAME 20190128-RV-B12M-4COMe-STYR-II  
 EXPNO 5  
 PROCNO 1

F2 - Acquisition Parameters  
 Date\_ 20190129  
 Time\_ 19.17  
 INSTRUM spect  
 PROBHD 5 mm PABBO BB/  
 PULPROG zgpg30  
 TD 65536  
 SOLVENT Acetone  
 NS 4098  
 DS 4  
 SWH 29761.904 Hz  
 FIDRES 0.454131 Hz  
 AQ 1.1010048 sec  
 RG 193.34  
 DW 16.800 usec  
 DE 6.50 usec  
 TE 296.8 K  
 D1 1.50000000 sec  
 D11 0.03000000 sec  
 TD0 1

----- CHANNEL f1 -----  
 NUC1 13C  
 P1 10.00 usec  
 PLW1 53.00000000 W  
 SFO1 100.6228293 MHz

----- CHANNEL f2 -----  
 CPDPRG[2] waltz16  
 NUC2 1H  
 PCPD2 80.00 usec  
 PLW2 12.50000000 W  
 PLW12 0.43945000 W  
 PLW13 0.28125000 W  
 SFO2 400.1316005 MHz

F2 - Processing parameters  
 SI 32768  
 SF 100.6126805 MHz  
 WDW EM  
 SSB 0  
 LB 2.00 Hz  
 GB 0  
 PC 1.40

20190128-B12M-4COOMeStyr 20 mg white solid [Et<sub>3</sub>NH][B<sub>12</sub>H<sub>10</sub>NHC(Menthyl)OCH<sub>2</sub>CH<sub>2</sub>C<sub>6</sub>H<sub>4</sub>COOMe] dissolved in 0.6 mL acetone-d<sub>6</sub>\*

<sup>13</sup>CDEPT NMR 100 MHz

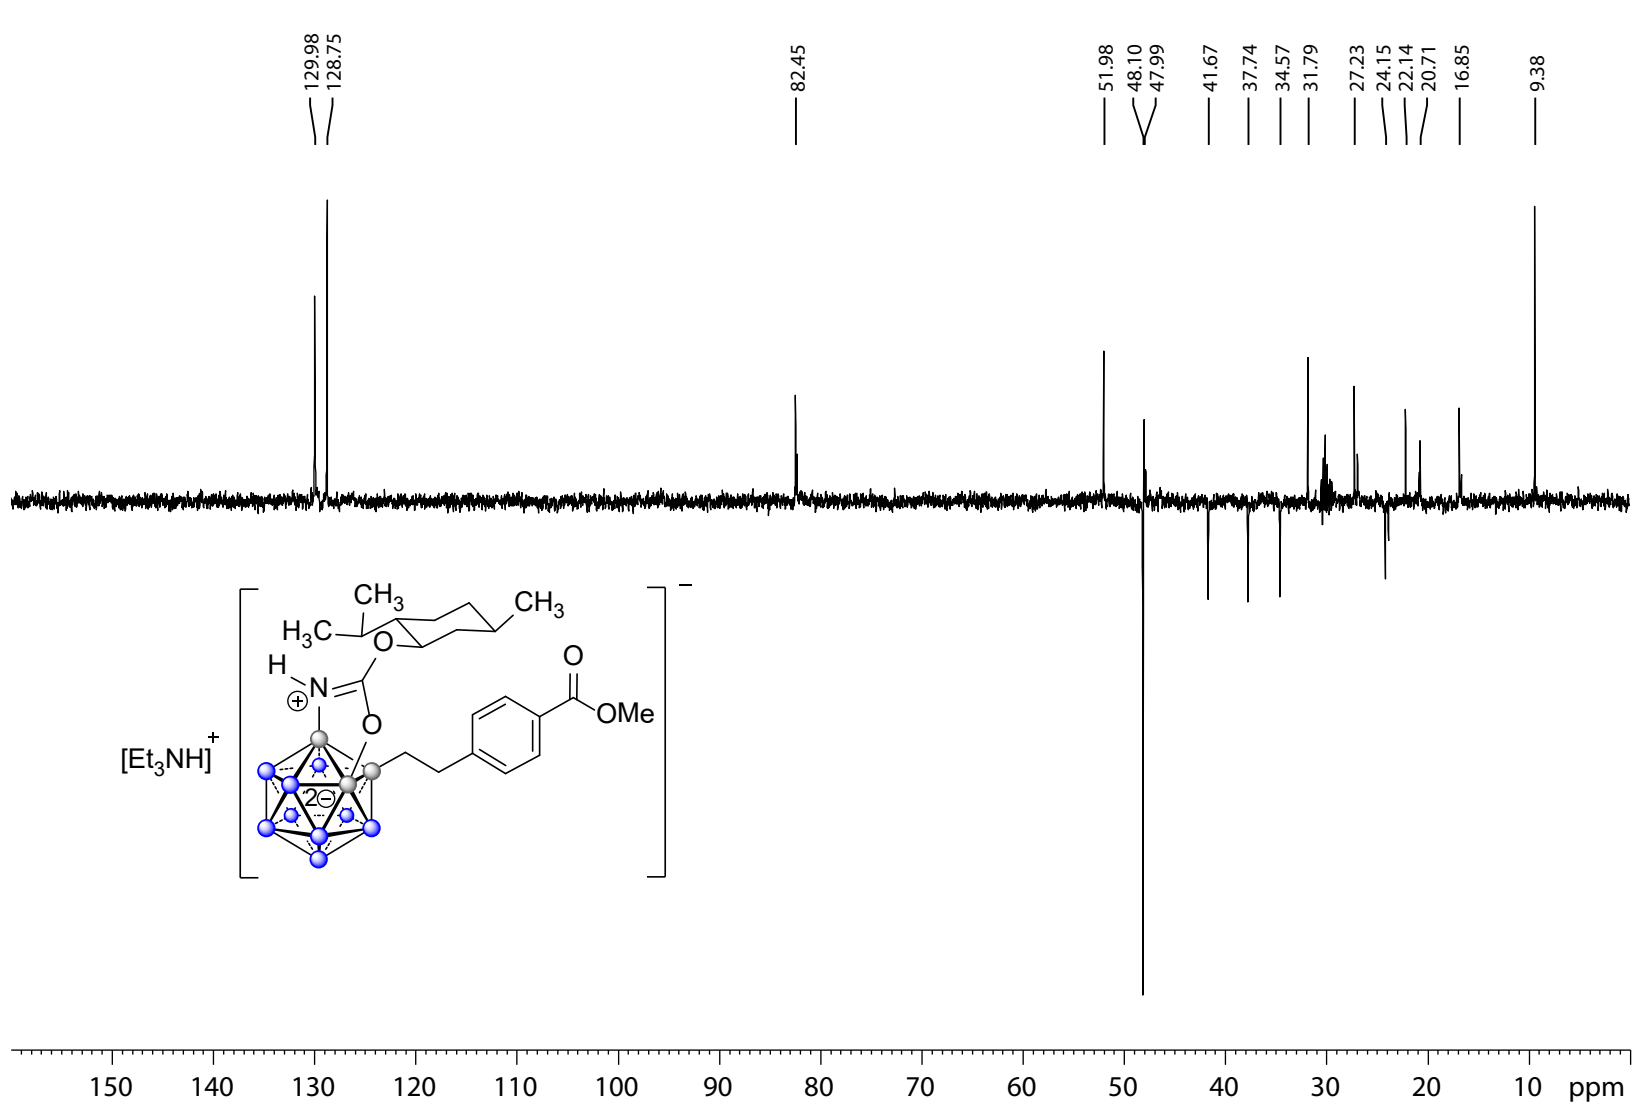

```

Current Data Parameters
NAME      20190128-RV-B12M-4COMe-STYR-II
EXPNO     6
PROCNO    1

F2 - Acquisition Parameters
Date_     20190129
Time      20.12
INSTRUM   spect
PROBHD    5 mm PABBO BB/
PULPROG   dept135
TD        65536
SOLVENT   Acetone
NS        1024
DS        4
SWH       29296.875 Hz
FIDRES    0.447035 Hz
AQ        1.1184810 sec
RG        193.34
DW        17.067 usec
DE        6.50 usec
TE        296.2 K
CNST2     145.0000000
D1        2.00000000 sec
D2        0.00344828 sec
D12       0.00002000 sec
TD0       1

===== CHANNEL f1 =====
NUC1      13C
P1        10.00 usec
P2        20.00 usec
PLW1     53.00000000 W
SFO1     100.6228293 MHz

===== CHANNEL f2 =====
CPDPRG[2] waltz16
NUC2      1H
P3        15.00 usec
P4        30.00 usec
PCPD2     80.00 usec
PLW2     12.50000000 W
PLW12    0.43945000 W
SFO2     400.1316005 MHz

F2 - Processing parameters
SI        32768
SF        100.6126805 MHz
WDW       EM
SSB       0
LB        2.00 Hz
GB        0
PC        4.00
    
```

<sup>1</sup>H - <sup>13</sup>C HSQC NMR

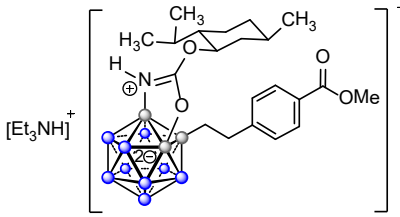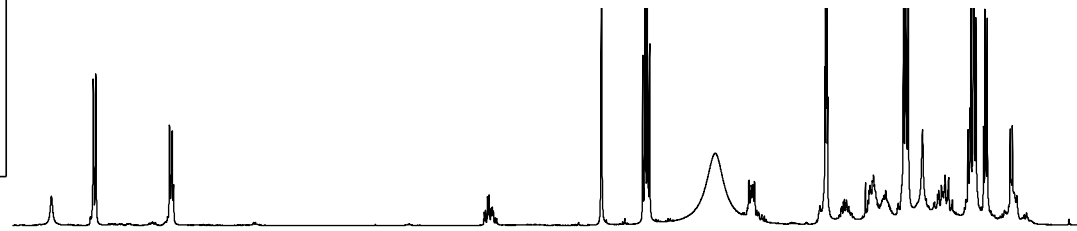

ppm

Current Data Parameters  
 NAME 20190128-RV-B12M-4CMe-STYR-II  
 EXPNO 7  
 PROCNO 1

F2 - Acquisition Parameters  
 Date\_ 20190129  
 Time\_ 20.14  
 INSTRUM spect  
 PROBHD 5 mm PABBO BB/  
 PULPROG hsqcetgps12  
 TD 1024  
 SOLVENT Acetone  
 NS 2  
 DS 16  
 SWH 6009.615 Hz  
 FIDRES 5.868765 Hz  
 AQ 0.0851968 sec  
 RG 193.34  
 DW 83.200 usec  
 DE 6.50 usec  
 TE 296.5 K  
 CNST2 145.0000000  
 D0 0.00000300 sec  
 D1 1.50000000 sec  
 D4 0.00172414 sec  
 D11 0.03000000 sec  
 D16 0.00020000 sec  
 D24 0.00086207 sec  
 INO 0.00001990 sec  
 ZGPGTNS

===== CHANNEL f1 =====  
 NUC1 1H  
 P1 15.00 usec  
 P2 30.00 usec  
 P28 1000.00 usec  
 PLW1 12.50000000 W  
 SFO1 400.1328009 MHz

===== CHANNEL f2 =====  
 CPDPRG2 gaxp  
 NUC2 13C  
 P3 10.00 usec  
 P4 20.00 usec  
 PCPD2 70.00 usec  
 PLW2 53.00000000 W  
 PLW12 1.08159995 W  
 SFO2 100.6238364 MHz

===== GRADIENT CHANNEL =====  
 GPNAM[1] SMSQ10.100  
 GPNAM[2] SMSQ10.100  
 GPNAM[3] SMSQ10.100  
 GPNAM[4] SMSQ10.100  
 GPZ1 80.00 %  
 GPZ2 20.10 %  
 GPZ3 11.00 %  
 GPZ4 -5.00 %  
 P16 1000.00 usec  
 P19 600.00 usec

F1 - Acquisition parameters  
 TD 256  
 SFO1 100.6238 MHz  
 FIDRES 196.524048 Hz  
 SW 249.991 ppm  
 FhMODE Echo-Antiecho

F2 - Processing parameters  
 SI 1024  
 SF 400.1300039 MHz  
 WDW QSINE  
 SSB 2  
 LB 0 Hz  
 GB 0  
 PC 1.40

F1 - Processing parameters  
 SI 1024  
 MC2 echo-antiecho  
 SF 100.6126679 MHz  
 WDW QSINE  
 SSB 2  
 LB 0 Hz  
 GB 0

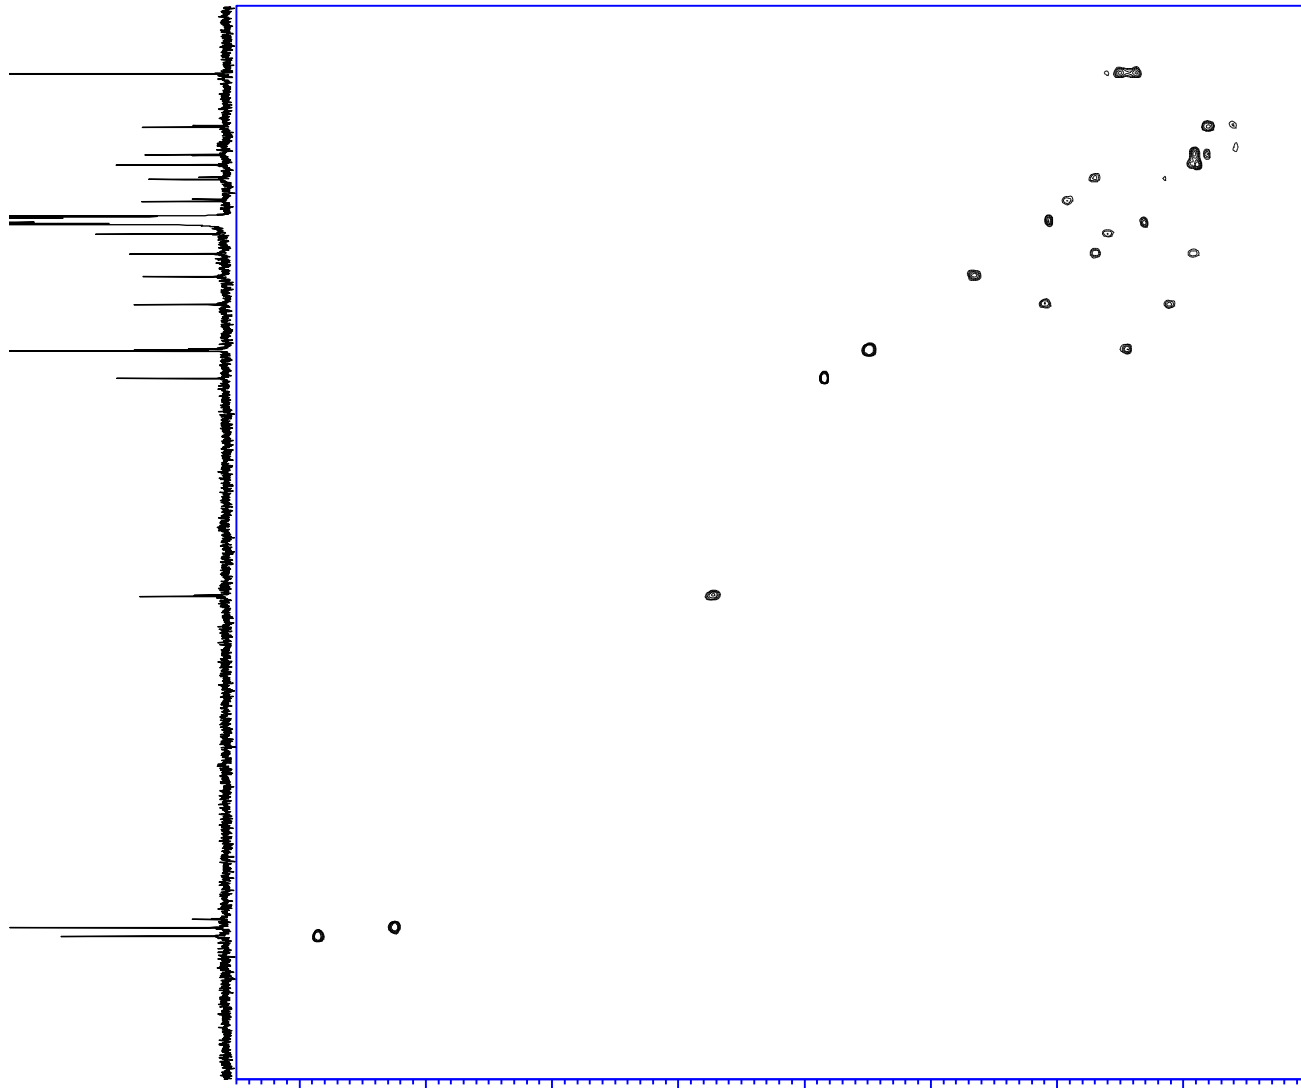

ppm

20190118-B12M-4FStyr 20 mg white solid  $[\text{Et}_3\text{NH}][\text{B}_{12}\text{H}_{10}\text{NHC}(\text{Menthyl})\text{OCH}_2\text{CH}_2\text{C}_6\text{H}_4\text{F}]$  dissolved in 0.6 mL acetone- $d_6$ \*

400MHz  $^1\text{H}$  NMR,  $\circ$  deuterated solvent residual peak= 2.05 ppm;  $\diamond$  water peak

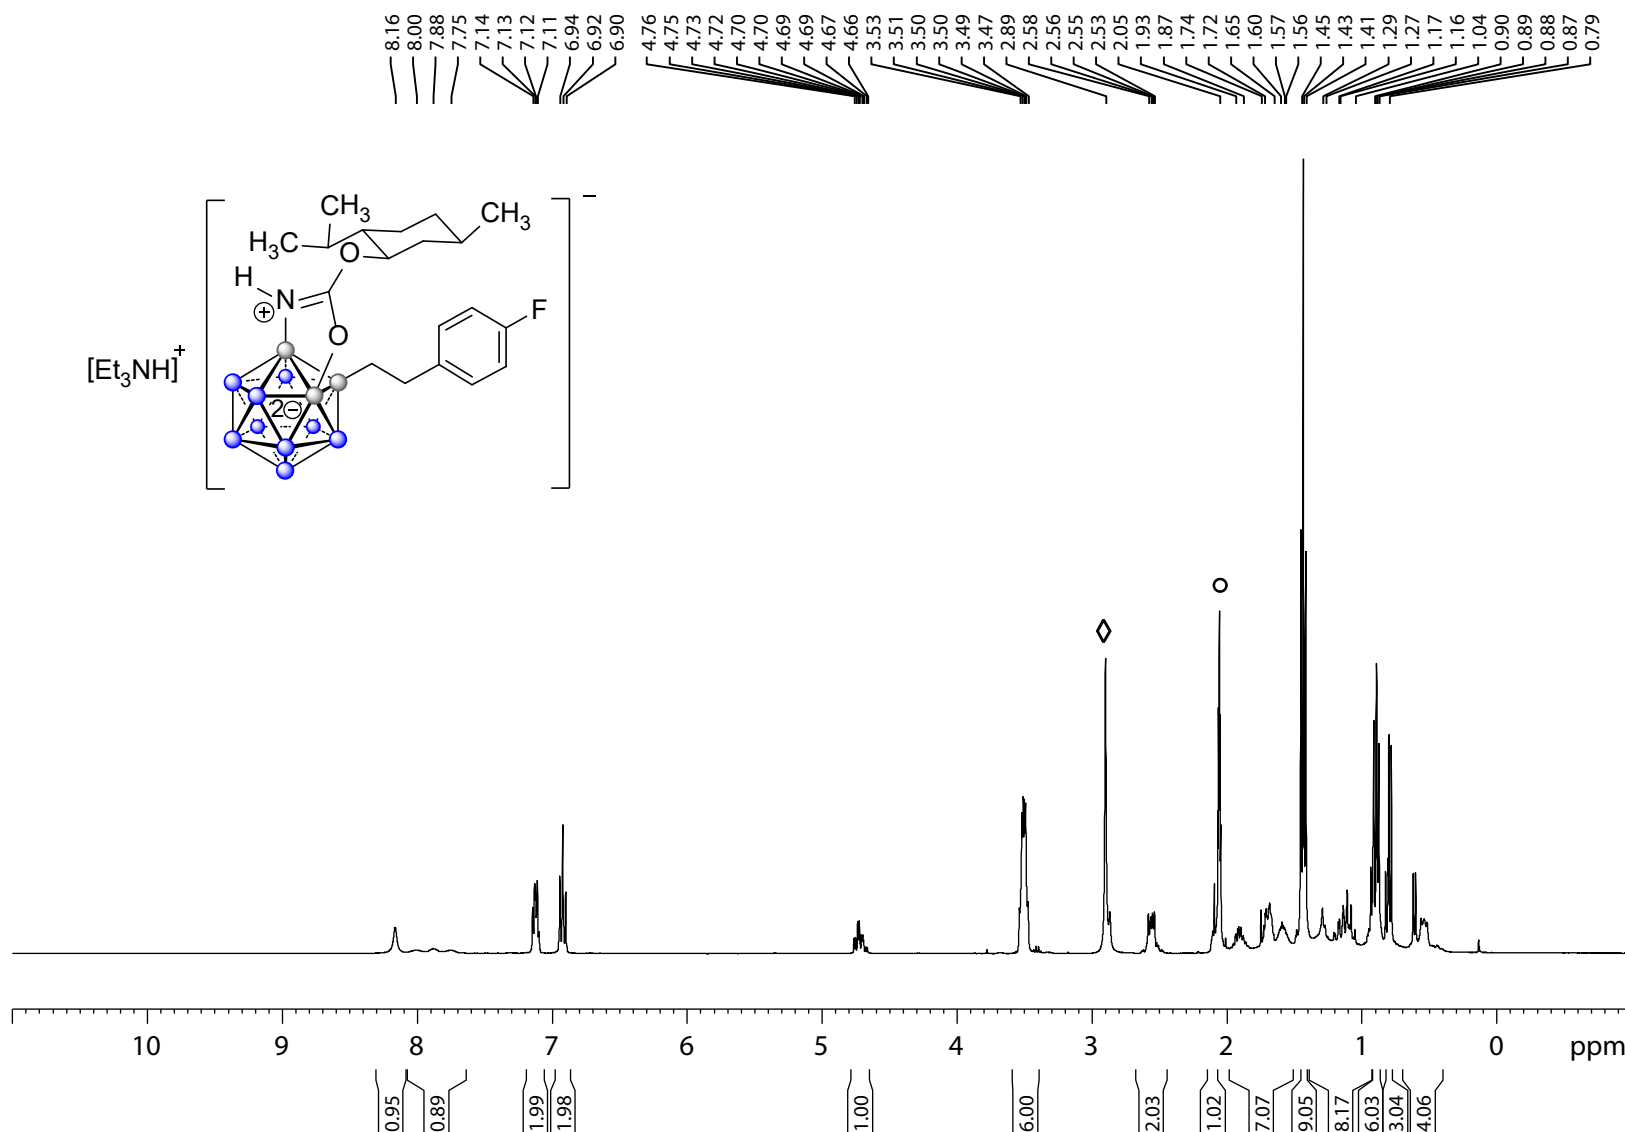



20190118-B12M-4FStyr 20 mg white solid [Et<sub>3</sub>NH][B<sub>12</sub>H<sub>10</sub>NHC(Menthyl)OCH<sub>2</sub>CH<sub>2</sub>C<sub>6</sub>H<sub>4</sub>F] dissolved in 0.6 mL acetone-d<sub>6</sub>\*

400MHz <sup>1</sup>H{B} NMR, ◊ deuterated solvent residual peak= 2.05 ppm; ◇ water peak

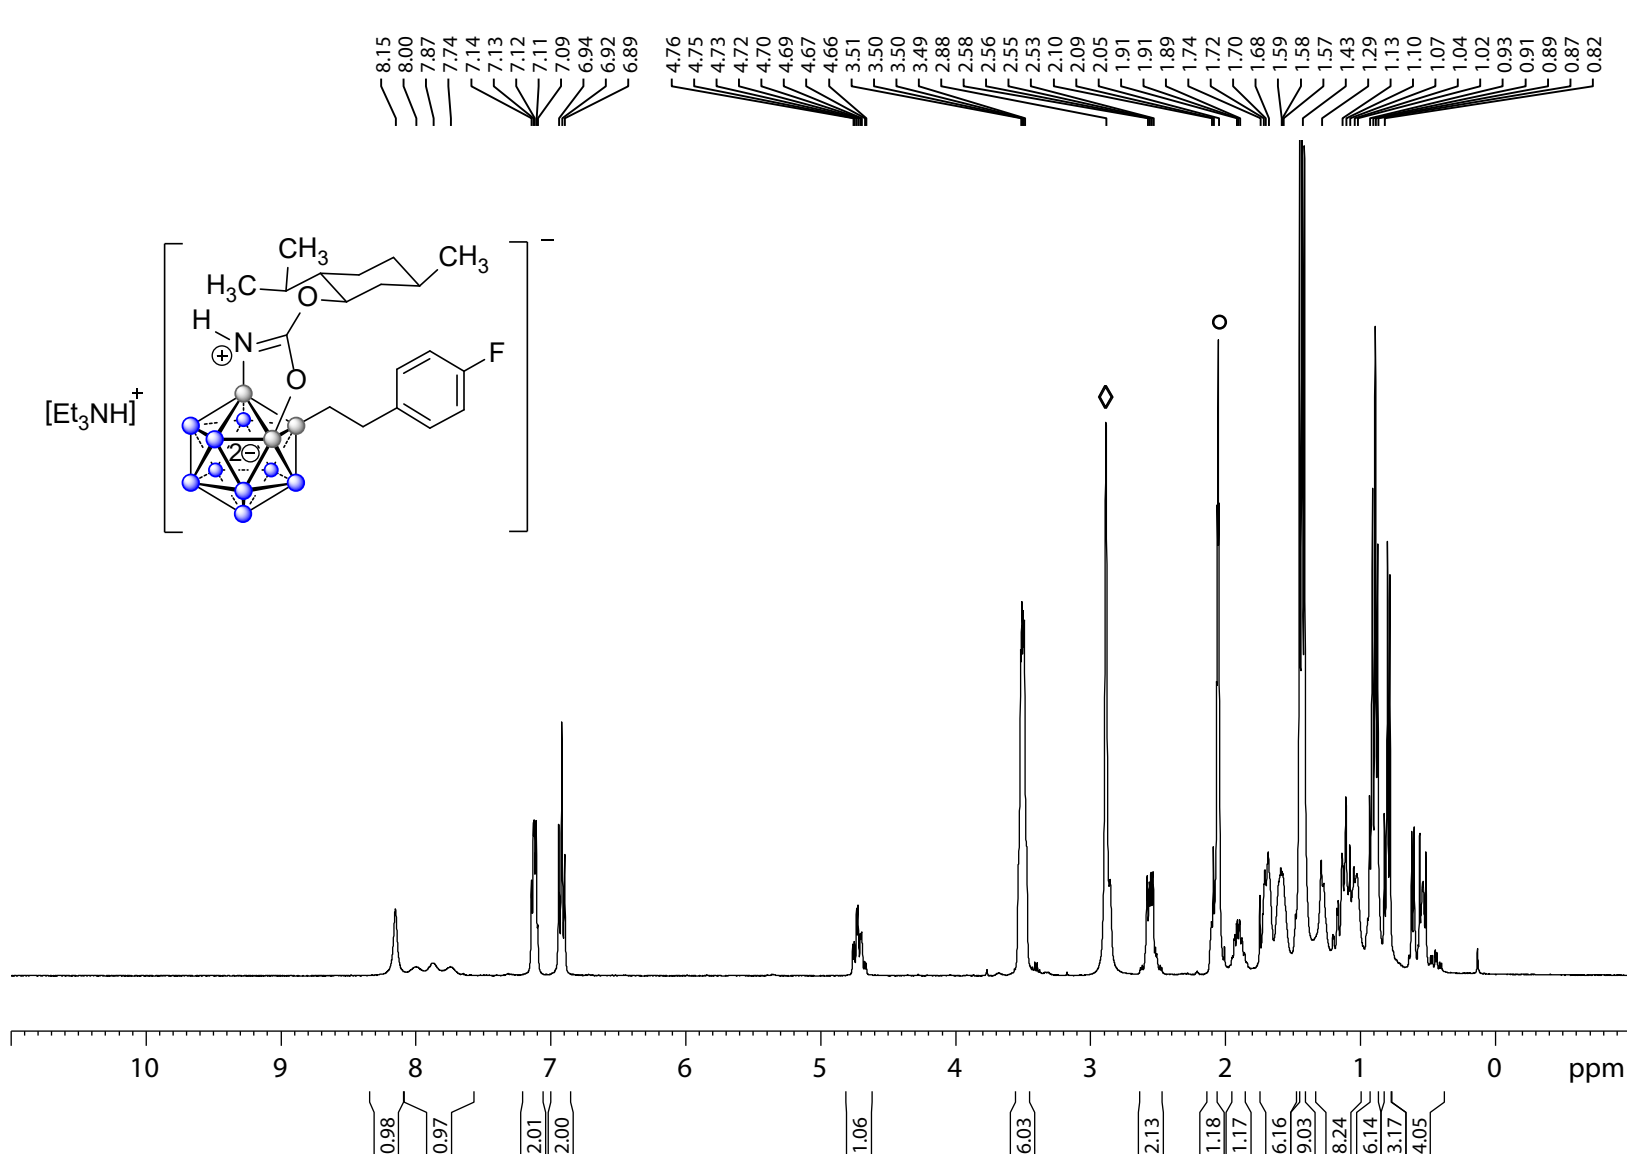

Current Data Parameters  
 NAME 20190118-RV-B12M-4FSTYR-I  
 EXPNO 2  
 PROCNO 1

F2 - Acquisition Parameters  
 Date\_ 20190119  
 Time\_ 18.46  
 INSTRUM spect  
 PROBHD 5 mm PABBO BB/  
 PULPROG zgig30  
 TD 16384  
 SOLVENT Acetone  
 NS 16  
 DS 4  
 SWH 8012.820 Hz  
 FIDRES 0.489064 Hz  
 AQ 1.0223616 sec  
 RG 107.6  
 DW 62.400 usec  
 DE 6.50 usec  
 TE 296.0 K  
 D1 1.00000000 sec  
 D11 0.03000000 sec  
 TD0 1

===== CHANNEL f1 =====  
 NUC1 1H  
 P1 15.00 usec  
 PLW1 12.50000000 W  
 SFO1 400.1320007 MHz

===== CHANNEL f2 =====  
 CPDPRG[2] garp4  
 NUC2 11B  
 PCPD2 90.00 usec  
 PLW2 52.96599960 W  
 PLW12 0.64477998 W  
 SFO2 128.3776050 MHz

F2 - Processing parameters  
 SI 32768  
 SF 400.1300069 MHz  
 WDW EM  
 SSB 0  
 LB 1.00 Hz  
 GB 0  
 PC 1.40

20190717-B12M-4FStyr 20 mg white solid  $[\text{Et}_3\text{NH}][\text{B}_{12}\text{H}_{10}\text{NHC}(\text{Menthyl})\text{OCH}_2\text{CH}_2\text{C}_6\text{H}_4\text{F}]$  dissolved in 0.6 mL acetone- $d_6^*$

$^{11}\text{B}$  NMR 128 MHz

Current Data Parameters  
 NAME 20190717-RV-B12M4FStyr  
 EXPNO 3  
 PROCNO 1

F2 - Acquisition Parameters  
 Date\_ 20190717  
 Time 17.15  
 INSTRUM spect  
 PROBHD 5 mm PABBO BB/  
 PULPROG zg  
 TD 65536  
 SOLVENT Acetone  
 NS 128  
 DS 4  
 SWH 25510.203 Hz  
 FIDRES 0.389255 Hz  
 AQ 1.2845056 sec  
 RG 193.34  
 DW 19.600 usec  
 DE 6.50 usec  
 TE 295.0 K  
 D1 1.00000000 sec  
 TD0 1

==== CHANNEL f1 =====  
 NUC1 11B  
 P1 9.93 usec  
 PLW1 52.96599960 W  
 SFO1 128.3776052 MHz

F2 - Processing parameters  
 SI 32768  
 SF 128.3776050 MHz  
 WDW EM  
 SSB 0  
 LB 10.00 Hz  
 GB 0  
 PC 1.40

5.94  
 -3.70  
 -7.68  
 -14.01  
 -15.04  
 -17.92  
 -18.74  
 -19.58  
 -20.53  
 -23.56  
 -24.60

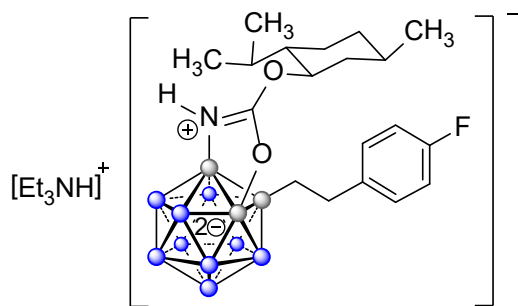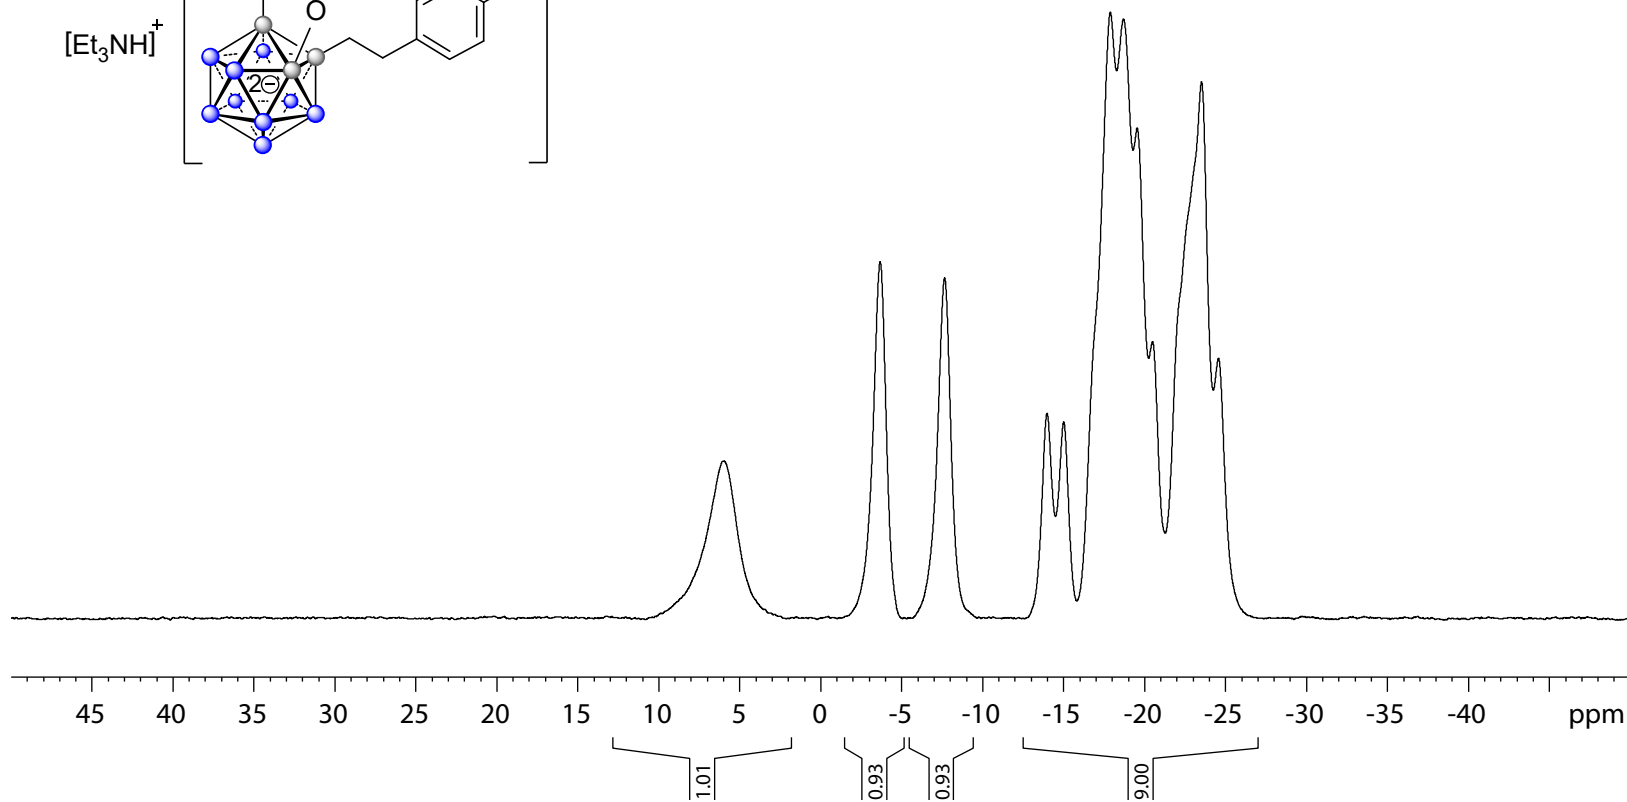

20190717-B12M-4FStyr 20 mg white solid  $[\text{Et}_3\text{NH}][\text{B}_{12}\text{H}_{10}\text{NHC}(\text{Menthyl})\text{OCH}_2\text{CH}_2\text{C}_6\text{H}_4\text{F}]$  dissolved in 0.6 mL acetone- $d_6^*$

$^{11}\text{B}\{^1\text{H}\}$  NMR 128 MHz

Current Data Parameters  
 NAME 20190717-RV-B12M4FStyr  
 EXPNO 4  
 PROCNO 1

F2 - Acquisition Parameters  
 Date\_ 20190717  
 Time\_ 17.21  
 INSTRUM spect  
 PROBHD 5 mm PABBO BB/  
 PULPROG zgpg30  
 TD 65536  
 SOLVENT Acetone  
 NS 128  
 DS 4  
 SWH 25510.203 Hz  
 FIDRES 0.389255 Hz  
 AQ 1.2845056 sec  
 RG 193.34  
 DW 19.600 usec  
 DE 6.50 usec  
 TE 295.6 K  
 D1 1.00000000 sec  
 D11 0.03000000 sec  
 TD0 1

===== CHANNEL f1 =====  
 NUC1 11B  
 P1 9.93 usec  
 PLW1 52.96599960 W  
 SFO1 128.3776050 MHz

===== CHANNEL f2 =====  
 CPDPRG[2] waltz16  
 NUC2 1H  
 PCPD2 80.00 usec  
 PLW2 12.50000000 W  
 PLW12 0.43945000 W  
 PLW13 0.28125000 W  
 SFO2 400.1320007 MHz

F2 - Processing parameters  
 SI 32768  
 SF 128.3776050 MHz  
 WDW EM  
 SSB 0  
 LB 10.00 Hz  
 GB 0  
 PC 1.40

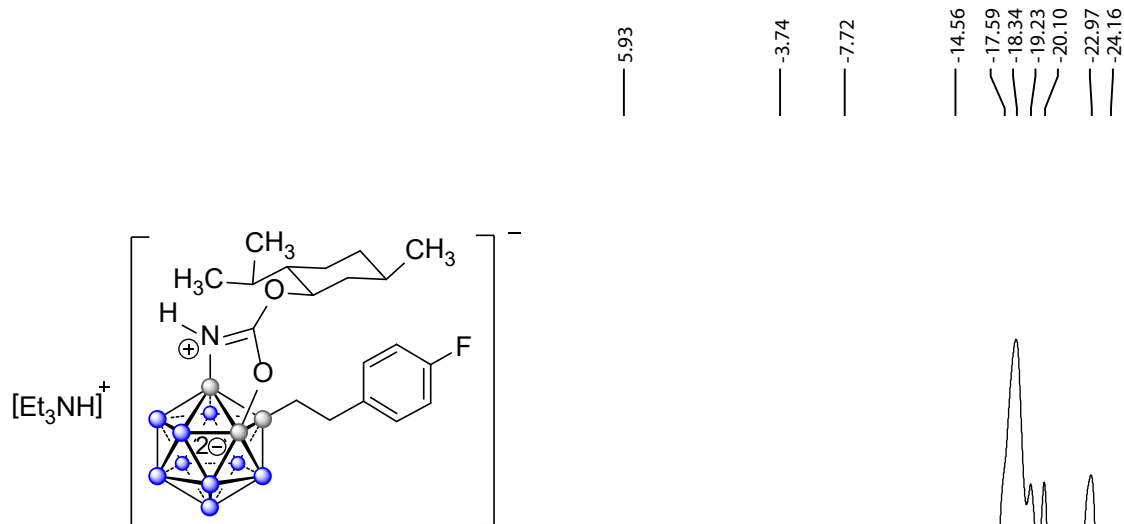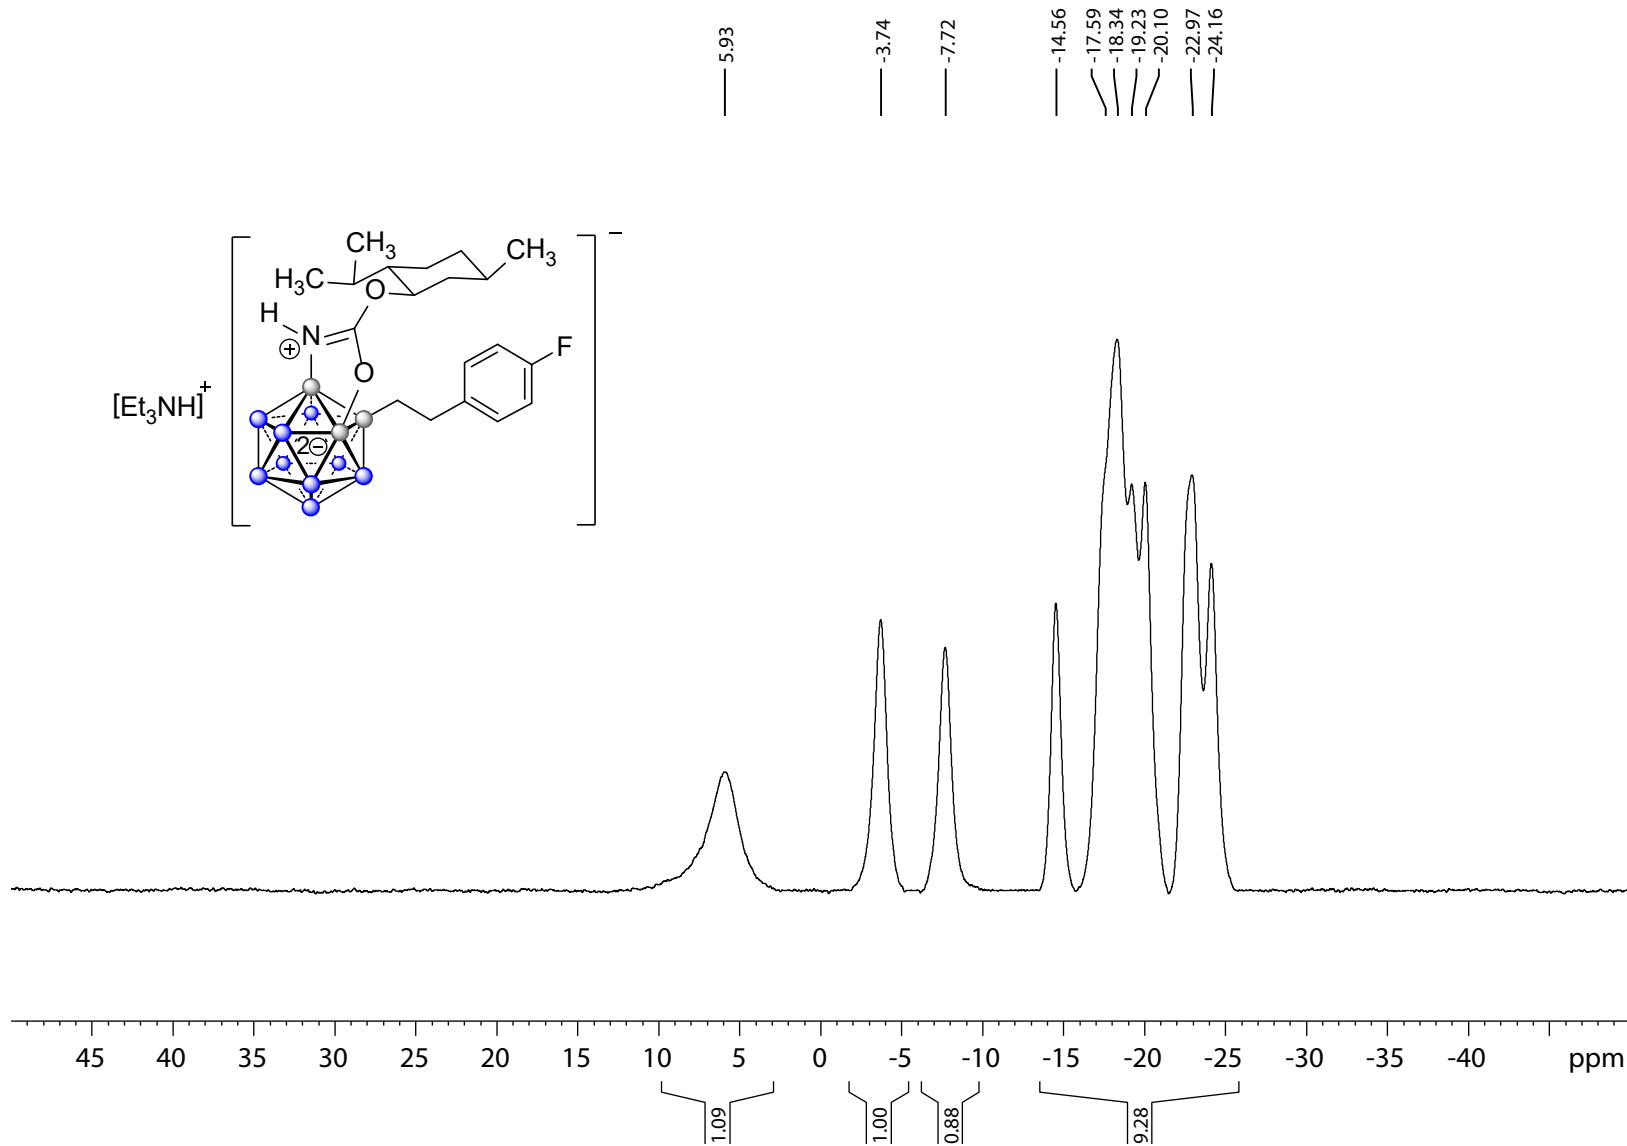

20190717-B12M-4FStyr 20 mg white solid [Et<sub>3</sub>NH][B<sub>12</sub>H<sub>10</sub>NHC(Menthyl)OCH<sub>2</sub>CH<sub>2</sub>C<sub>6</sub>H<sub>4</sub>F] dissolved in 0.6 mL acetone-d<sub>6</sub>\*

<sup>13</sup>C{<sup>1</sup>H} NMR 100 MHz

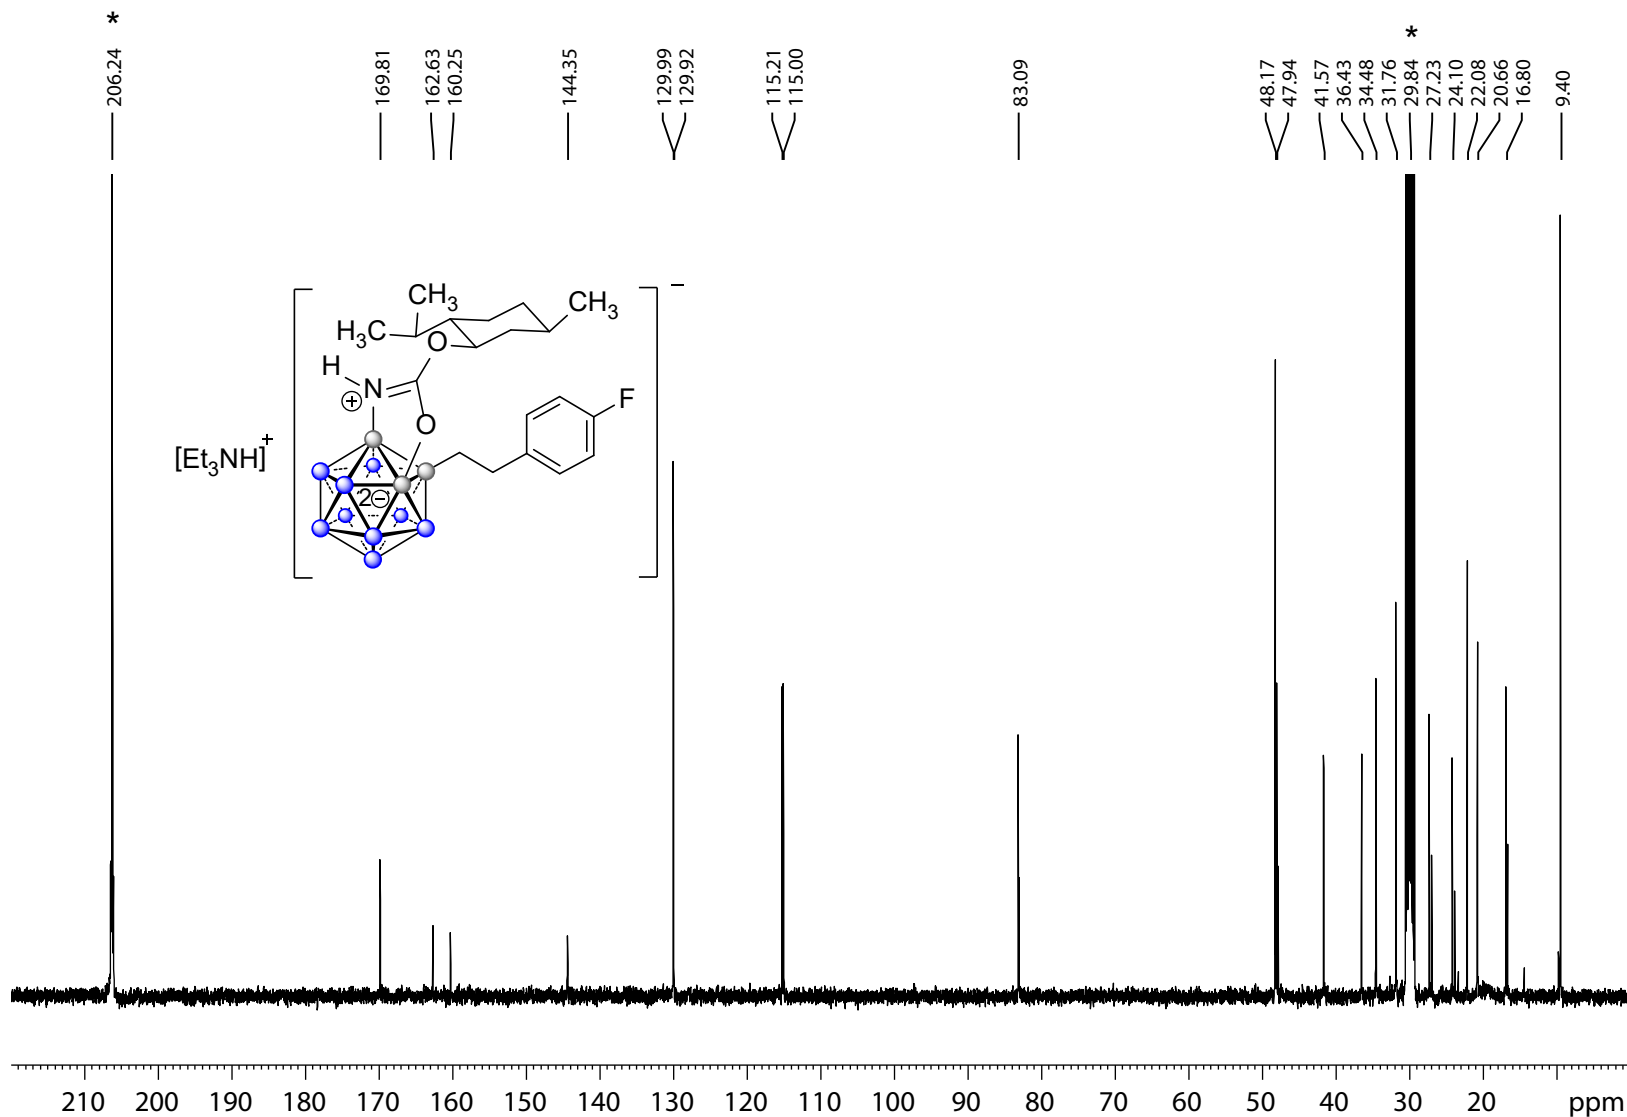

Current Data Parameters  
 NAME 20190717-RV-B12M4FStyr  
 EXPNO 5  
 PROCNO 1

F2 - Acquisition Parameters  
 Date\_ 20190717  
 Time\_ 18.55  
 INSTRUM spect  
 PROBHD 5 mm PABBO BB/  
 PULPROG zgpg30  
 TD 65536  
 SOLVENT Acetone  
 NS 2048  
 DS 4  
 SWH 29761.904 Hz  
 FIDRES 0.454131 Hz  
 AQ 1.1010048 sec  
 RG 193.34  
 DW 16.800 usec  
 DE 6.50 usec  
 TE 296.1 K  
 D1 1.50000000 sec  
 D11 0.03000000 sec  
 TD0 1

==== CHANNEL f1 =====  
 NUC1 13C  
 P1 10.00 usec  
 PLW1 53.00000000 W  
 SFO1 100.6228293 MHz

==== CHANNEL f2 =====  
 CPDPRG[2] waltz16  
 NUC2 1H  
 PCPD2 80.00 usec  
 PLW2 12.50000000 W  
 PLW12 0.43945000 W  
 PLW13 0.28125000 W  
 SFO2 400.1316005 MHz

F2 - Processing parameters  
 SI 32768  
 SF 100.6126839 MHz  
 WDW EM  
 SSB 0  
 LB 1.00 Hz  
 GB 0  
 PC 1.40

20190118-B12M-4FStyr 20 mg white solid [Et<sub>3</sub>NH][B<sub>12</sub>H<sub>10</sub>NHC(Menthyl)OCH<sub>2</sub>CH<sub>2</sub>C<sub>6</sub>H<sub>4</sub>F] dissolved in 0.6 mL acetone-d<sub>6</sub>\*

<sup>13</sup>CDEPT NMR 100 MHz

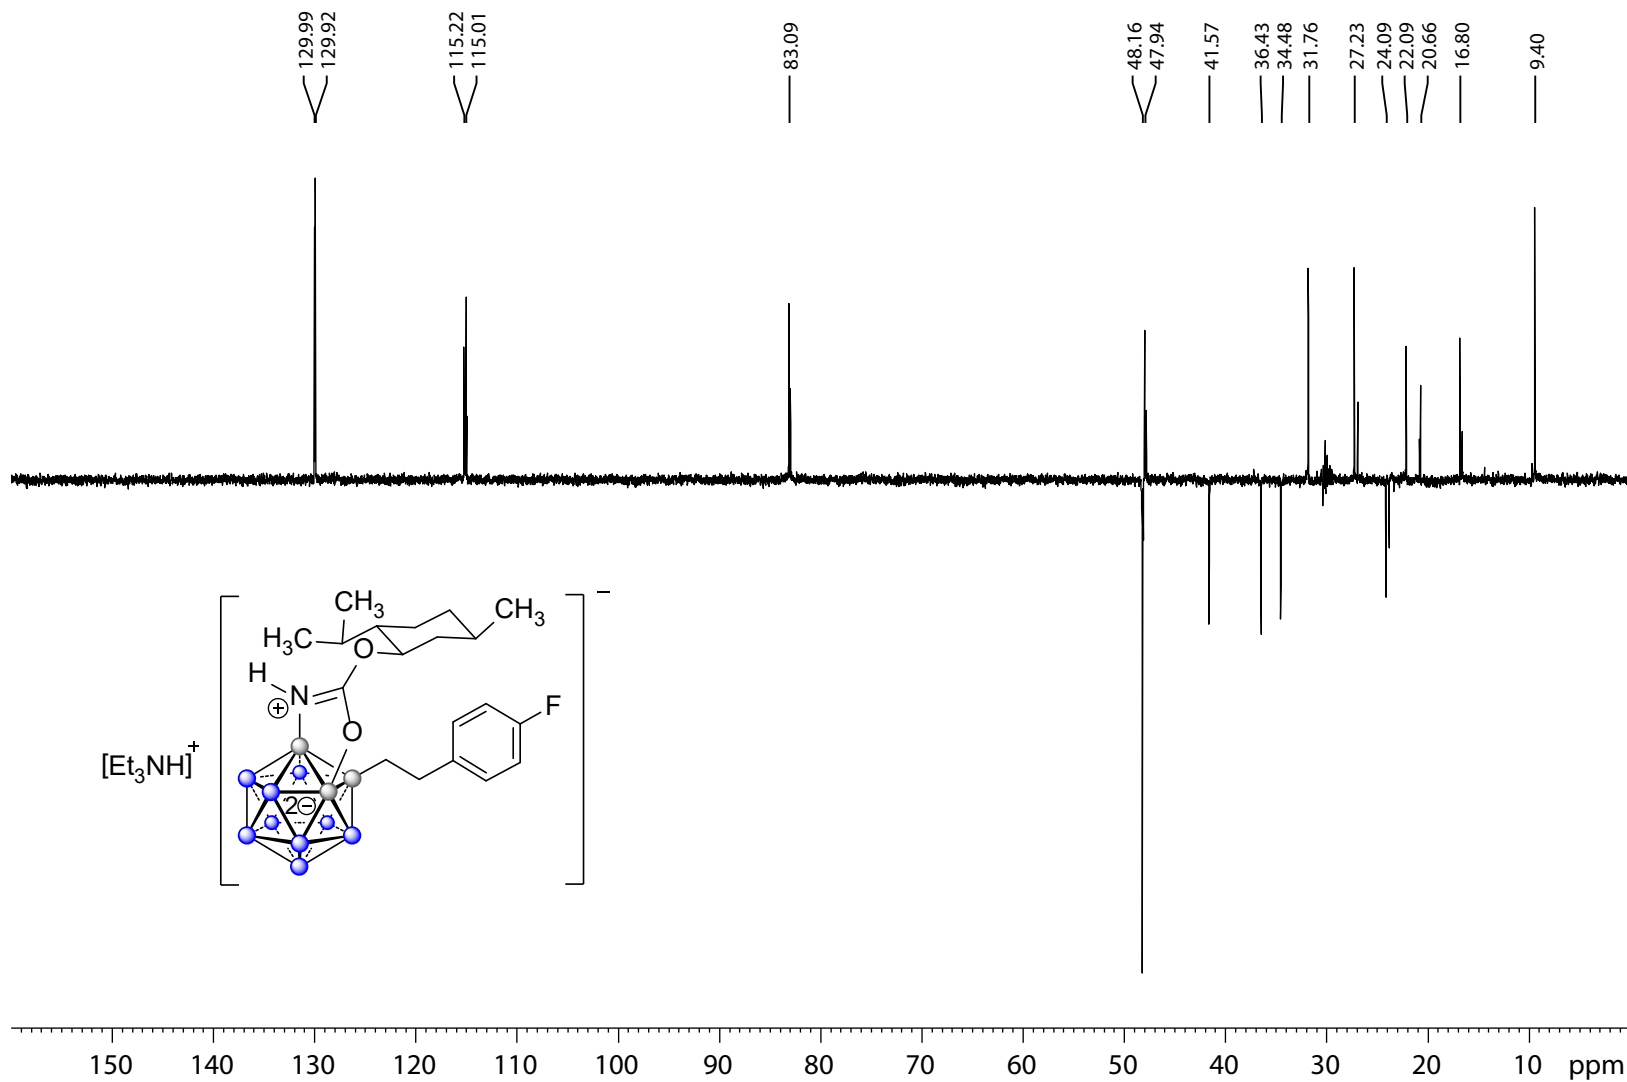

Current Data Parameters  
NAME 20190717-RV-B12M4FStyr  
EXPNO 6  
PROCNO 1

F2 - Acquisition Parameters  
Date\_ 20190717  
Time\_ 19.23  
INSTRUM spect  
PROBHD 5 mm PABBO BB/  
PULPROG dept135  
TD 65536  
SOLVENT Acetone  
NS 512  
DS 4  
SWH 29296.875 Hz  
FIDRES 0.447035 Hz  
AQ 1.1184810 sec  
RG 193.34  
DW 17.067 usec  
DE 6.50 usec  
TE 295.5 K  
CNST2 145.0000000  
D1 2.00000000 sec  
D2 0.00344828 sec  
D12 0.00002000 sec  
TD0 1

===== CHANNEL f1 =====  
NUC1 13C  
P1 10.00 usec  
P2 20.00 usec  
PLW1 53.00000000 W  
SFO1 100.6228293 MHz

===== CHANNEL f2 =====  
CPDPRG[2] waltz16  
NUC2 1H  
P3 15.00 usec  
P4 30.00 usec  
PCPD2 80.00 usec  
PLW2 12.50000000 W  
PLW12 0.43945000 W  
SFO2 400.1316005 MHz

F2 - Processing parameters  
SI 32768  
SF 100.6126837 MHz  
WDW EM  
SSB 0  
LB 1.00 Hz  
GB 0  
PC 4.00

20190118-B12M-4FStyr 20 mg white solid [Et<sub>3</sub>NH][B<sub>12</sub>H<sub>10</sub>NHC(Menthyl)OCH<sub>2</sub>CH<sub>2</sub>C<sub>6</sub>H<sub>4</sub>F] dissolved in 0.6 mL acetone-d<sub>6</sub>\*

<sup>1</sup>H - <sup>1</sup>H COSY NMR

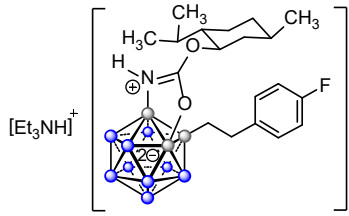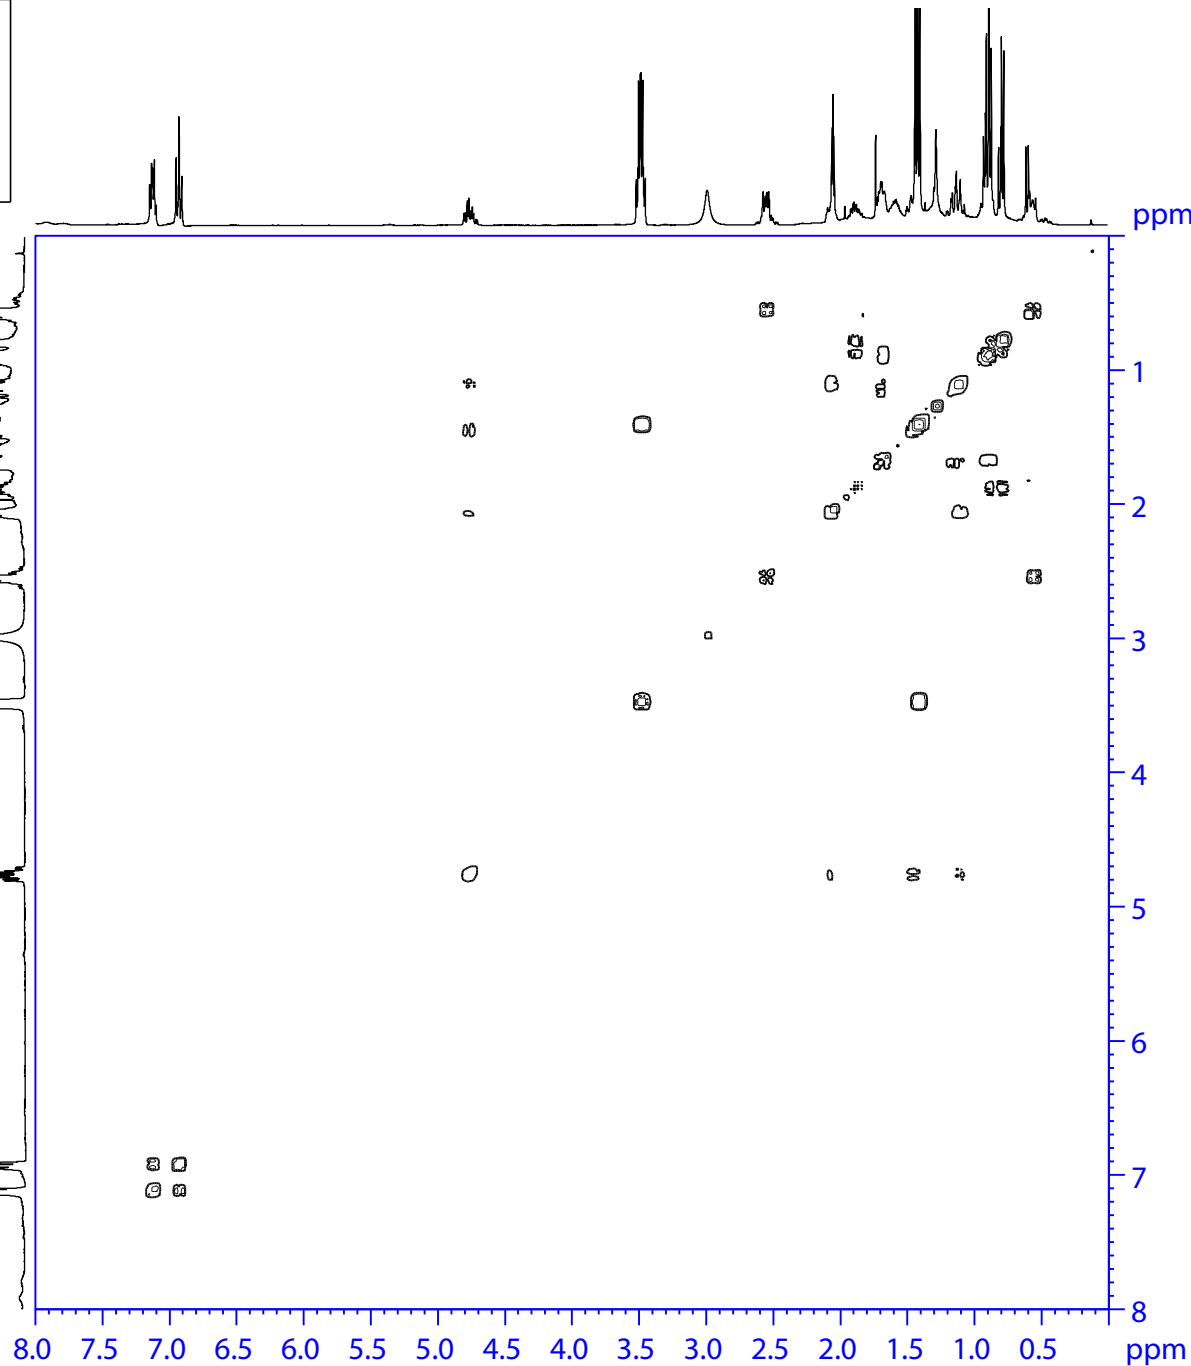

Current Data Parameters  
NAME 20190717-RV-B12M4FStyr  
EXPNO 8  
PROCNO 1

F2 - Acquisition Parameters  
Date\_ 20190717  
Time\_ 19.39  
INSTRUM spect  
PROBHD 5 mm PABBO BB/  
PULPROG cosygpppqf  
TD 2048  
SOLVENT Acetone  
NS 2  
DS 8  
SWH 5341.880 Hz  
FIDRES 2.608340 Hz  
AQ 0.1916928 sec  
RG 124.48  
DW 93.600 usec  
DE 6.50 usec  
TE 295.3 K  
D0 0.0000300 sec  
D1 2.0000000 sec  
D11 0.0300000 sec  
D12 0.0000200 sec  
D13 0.0000400 sec  
D16 0.0002000 sec  
INO 0.00018720 sec

==== CHANNEL f1 =====  
NUC1 1H  
P0 15.00 usec  
P1 15.00 usec  
P17 2500.00 usec  
PLW1 12.5000000 W  
PLW10 4.16050005 W  
SFO1 400.1324057 MHz

===== GRADIENT CHANNEL =====  
GPNAM[1] SMSQ10.100  
GPZ1 10.00 %  
P16 1000.00 usec

F1 - Acquisition parameters  
TD 128  
SFO1 400.1324 MHz  
FIDRES 83.466881 Hz  
SW 13.350 ppm  
FrMODE QF

F2 - Processing parameters  
SI 1024  
SF 400.1300096 MHz  
WDW QSINE  
SSB 0  
LB 0 Hz  
GB 0  
PC 1.40

F1 - Processing parameters  
SI 1024  
MC2 QF  
SF 400.1300095 MHz  
WDW QSINE  
SSB 0  
LB 0 Hz  
GB 0

20190118-B12M-4FStyr 20 mg white solid [Et<sub>3</sub>NH][B<sub>12</sub>H<sub>10</sub>NHC(Menthyl)OCH<sub>2</sub>CH<sub>2</sub>C<sub>6</sub>H<sub>4</sub>F] dissolved in 0.6 mL acetone-d<sub>6</sub>\*

<sup>1</sup>H - <sup>13</sup>C HSQC NMR

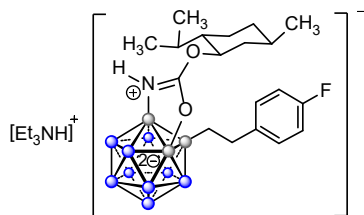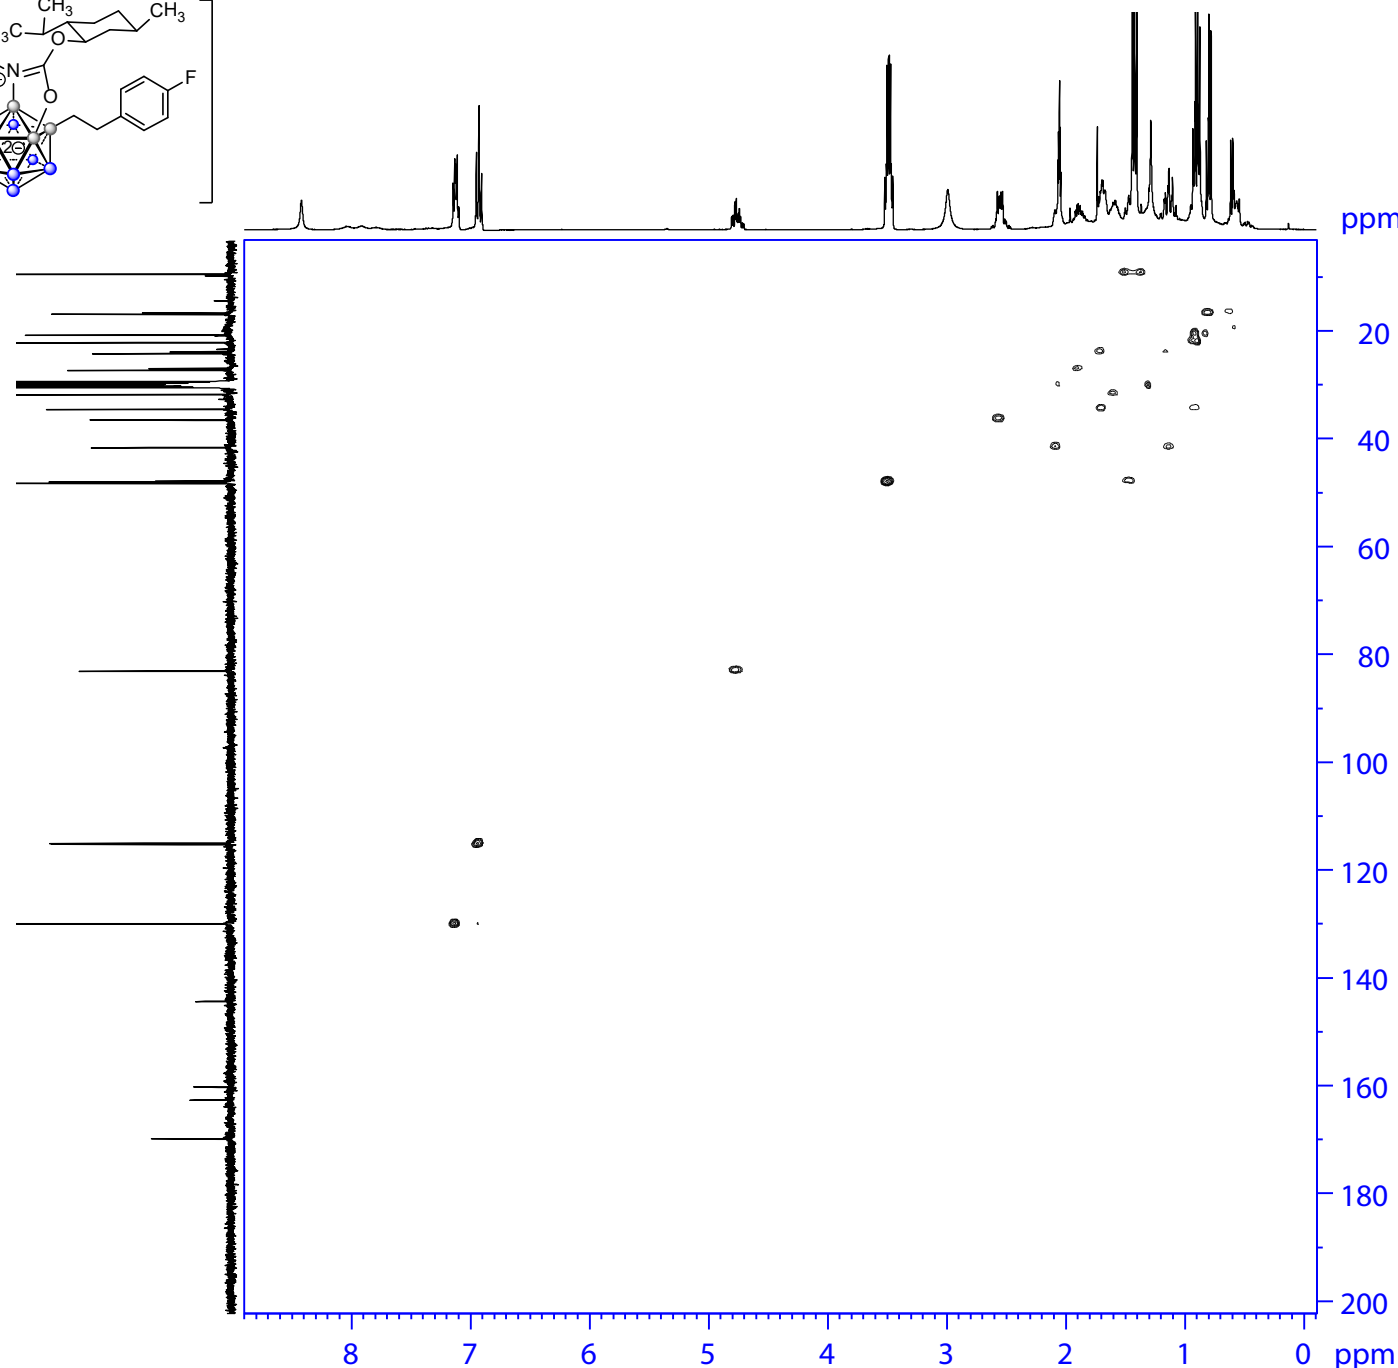

Current Data Parameters  
NAME 20190717-RV-B12M4FStyr  
EXPNO 7  
PROCNO 1

F2 - Acquisition Parameters  
Date\_ 20190717  
Time 19.25  
INSTRUM spect  
PROBHD 5 mm PABBO BB/  
PULPROG hsqcetgps12  
TD 1024  
SOLVENT Acetone  
NS 2  
DS 16  
SWH 6009.615 Hz  
FIDRES 5.868765 Hz  
AQ 0.0851968 sec  
RG 193.34  
DW 83.200 usec  
DE 6.50 usec  
TE 295.4 K  
CNST2 145.0000000  
D0 0.0000300 sec  
D1 1.50000000 sec  
D4 0.00172414 sec  
D11 0.03000000 sec  
D16 0.00020000 sec  
D24 0.00086207 sec  
IN0 0.00001990 sec  
ZGPTNS

===== CHANNEL f1 =====  
NUC1 1H  
P1 15.00 usec  
P2 30.00 usec  
P28 1000.00 usec  
PLW1 12.50000000 W  
SFO1 400.1328009 MHz

===== CHANNEL f2 =====  
CPDPRG2 gaxp  
NUC2 13C  
P3 10.00 usec  
P4 20.00 usec  
PCPD2 70.00 usec  
PLW2 53.00000000 W  
PLW12 1.08159995 W  
SFO2 100.6238364 MHz

===== GRADIENT CHANNEL =====  
GPNAM[1] SMSQ10.100  
GPNAM[2] SMSQ10.100  
GPNAM[3] SMSQ10.100  
GPNAM[4] SMSQ10.100  
GPZ1 80.00 %  
GPZ2 20.10 %  
GPZ3 11.00 %  
GPZ4 -5.00 %  
P16 1000.00 usec  
P19 600.00 usec

F1 - Acquisition parameters  
TD 256  
SFO1 100.6238 MHz  
FIDRES 196.524048 Hz  
SW 249.991 ppm  
FhMODE Echo-Antiecho

F2 - Processing parameters  
SI 1024  
SF 400.1300020 MHz  
WDW QSINE  
SSB 2  
LB 0 Hz  
GB 0  
PC 1.40

F1 - Processing parameters  
SI 1024  
MC2 echo-antiecho  
SF 100.6126718 MHz  
WDW QSINE  
SSB 2  
LB 0 Hz  
GB 0

20190310-B12M-4CNStyr 20 mg white solid [Et<sub>3</sub>NH][B<sub>12</sub>H<sub>10</sub>NHC(Menthyl)OCH<sub>2</sub>CH<sub>2</sub>C<sub>6</sub>H<sub>4</sub>CN] dissolved in 0.6 mL acetone-d<sub>6</sub>\*

400MHz <sup>1</sup>H NMR, ◊ deuterated solvent residual peak= 2.05 ppm; ○ water peak

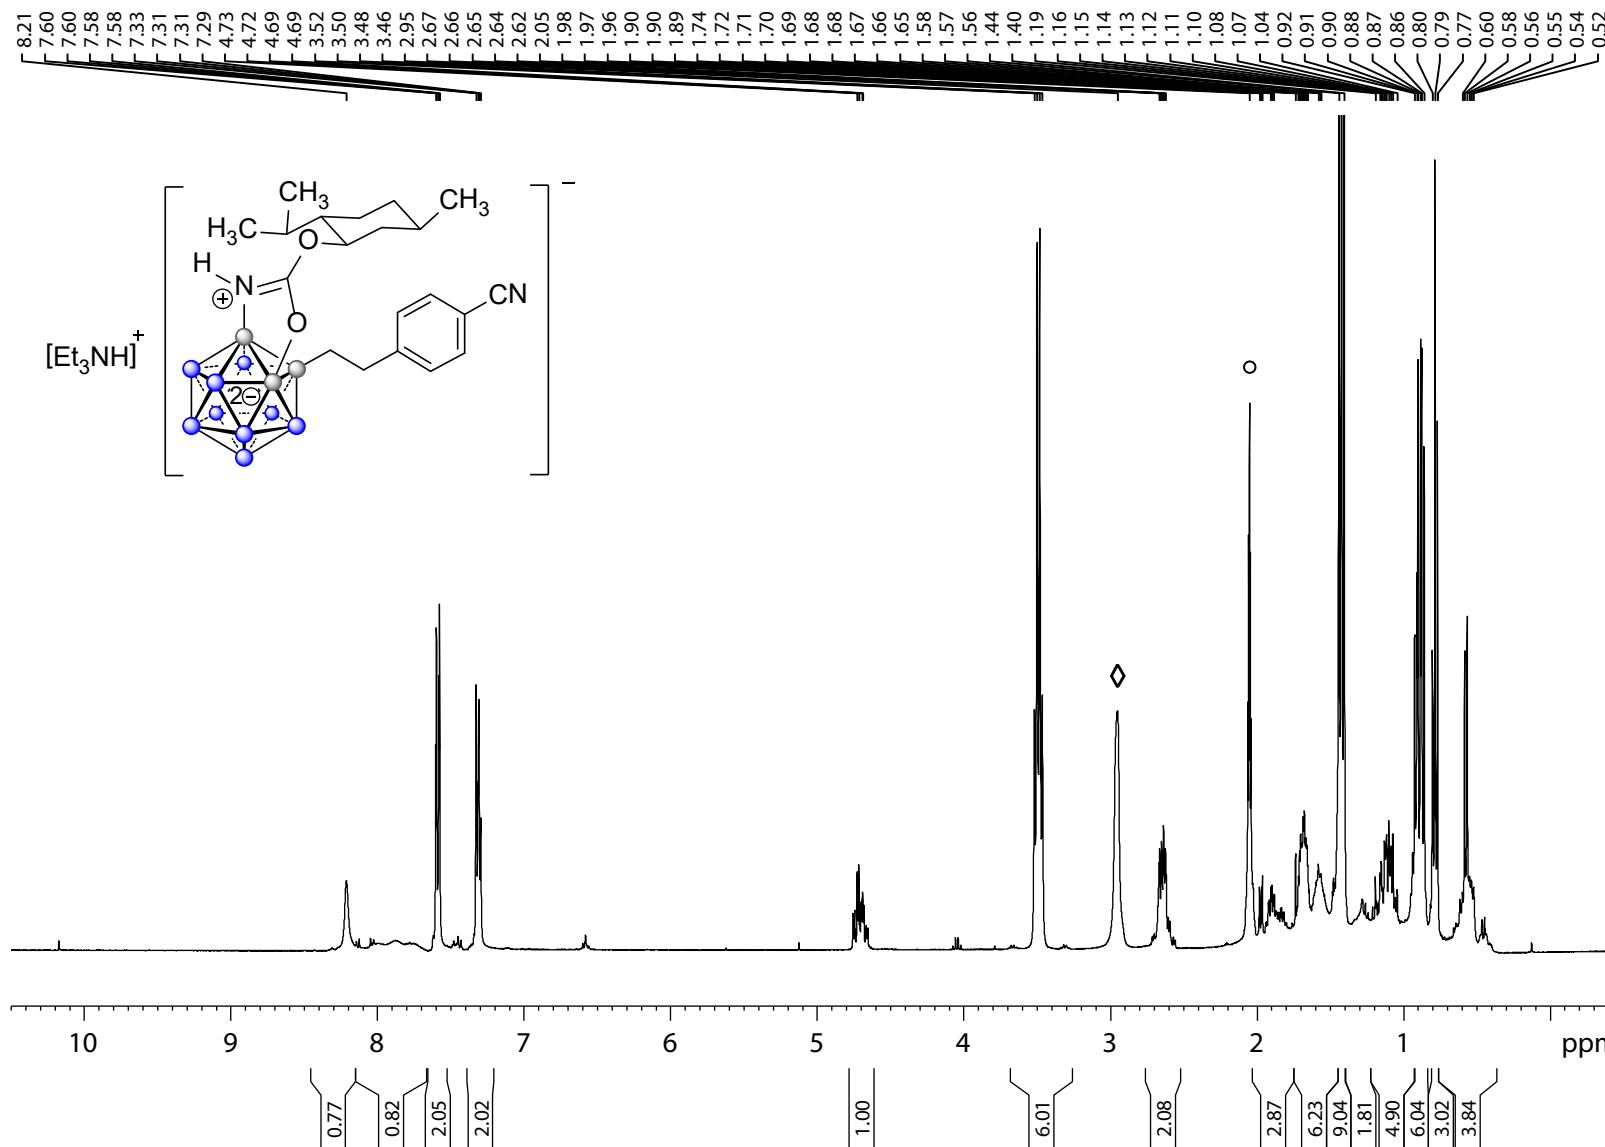

Current Data Parameters  
 NAME B12-MENTH-4CN-STYR-II  
 EXPNO 1  
 PROCNO 1

F2 - Acquisition Parameters  
 Date\_ 20190310  
 Time\_ 6.13  
 INSTRUM spect  
 PROBHD 5 mm PABBO BB/  
 PULPROG zg30  
 TD 65536  
 SOLVENT Acetone  
 NS 16  
 DS 2  
 SWH 10000.000 Hz  
 FIDRES 0.152588 Hz  
 AQ 3.2767999 sec  
 RG 86.58  
 DW 50.000 usec  
 DE 6.50 usec  
 TE 294.3 K  
 D1 1.00000000 sec  
 TD0 1

==== CHANNEL f1 =====  
 NUC1 1H  
 P1 15.00 usec  
 PLW1 12.5000000 W  
 SFO1 400.1328009 MHz

F2 - Processing parameters  
 SI 65536  
 SF 400.1300069 MHz  
 WDW EM  
 SSB 0  
 LB 0.30 Hz  
 GB 0  
 PC 1.00



20190310-B12M-4CNStyr 20 mg white solid  $[\text{Et}_3\text{NH}][\text{B}_{12}\text{H}_{10}\text{NHC}(\text{Menthyl})\text{OCH}_2\text{CH}_2\text{C}_6\text{H}_4\text{CN}]$  dissolved in 0.6 mL acetone- $d_6^*$

400MHz  $^1\text{H}\{\text{B}\}$  NMR,  $\circ$  deuterated solvent residual peak= 2.05 ppm;  $\diamond$  water peak

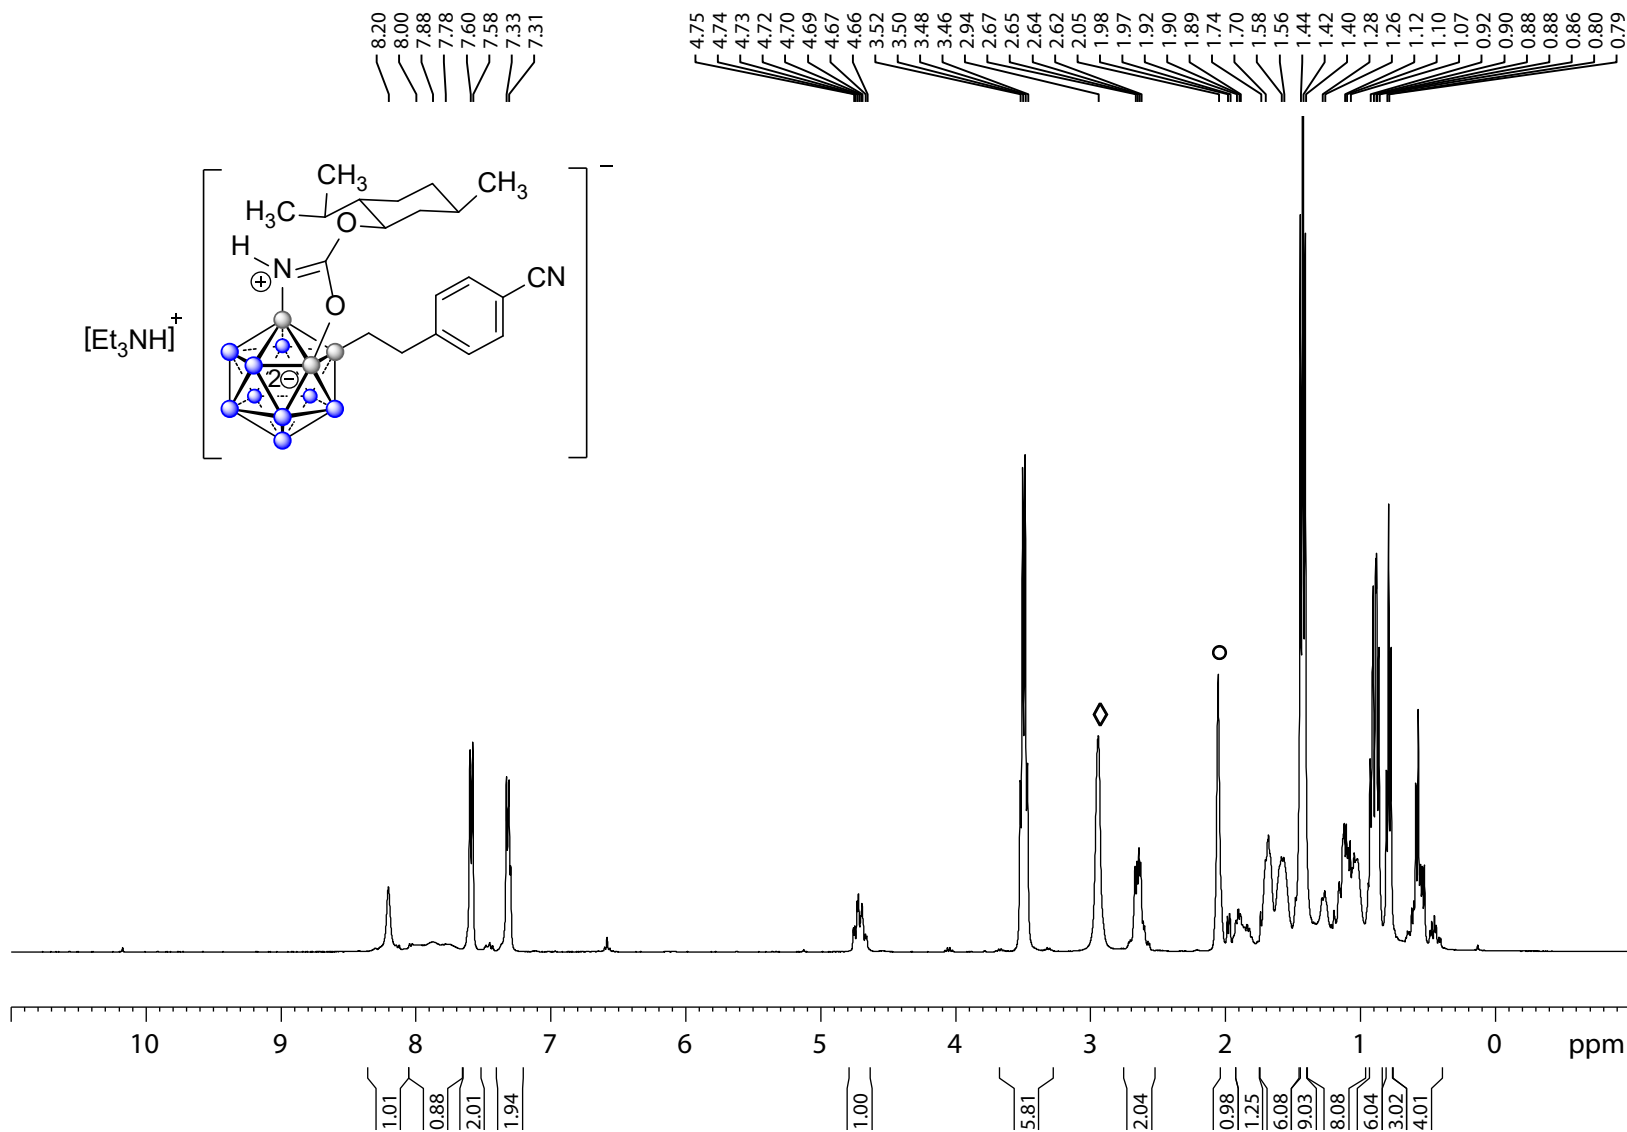

Current Data Parameters  
 NAME B12-MENTH-4CN-STYR-II  
 EXPNO 2  
 PROCNO 1

F2 - Acquisition Parameters  
 Date\_ 20190310  
 Time\_ 6.15  
 INSTRUM spect  
 PROBHD 5 mm PABBO BB/  
 PULPROG zgig30  
 TD 16384  
 SOLVENT Acetone  
 NS 16  
 DS 4  
 SWH 8012.820 Hz  
 FIDRES 0.489064 Hz  
 AQ 1.0223616 sec  
 RG 107.6  
 DW 62.400 usec  
 DE 6.50 usec  
 TE 294.5 K  
 D1 1.00000000 sec  
 D11 0.03000000 sec  
 TD0 1

===== CHANNEL f1 =====  
 NUC1 1H  
 P1 15.00 usec  
 PLW1 12.50000000 W  
 SFO1 400.1320007 MHz

===== CHANNEL f2 =====  
 CPDPRG[2] garp4  
 NUC2 11B  
 PCPD2 90.00 usec  
 PLW2 52.96599960 W  
 PLW12 0.64477998 W  
 SFO2 128.3776050 MHz

F2 - Processing parameters  
 SI 32768  
 SF 400.1300070 MHz  
 WDW EM  
 SSB 0  
 LB 1.00 Hz  
 GB 0  
 PC 1.40

20190310-B12M-4CNStyr 20 mg white solid [Et<sub>3</sub>NH][B<sub>12</sub>H<sub>10</sub>NHC(Menthyl)OCH<sub>2</sub>CH<sub>2</sub>C<sub>6</sub>H<sub>4</sub>CN] dissolved in 0.6 mL acetone-d<sub>6</sub>\*

<sup>11</sup>B NMR 128MHz

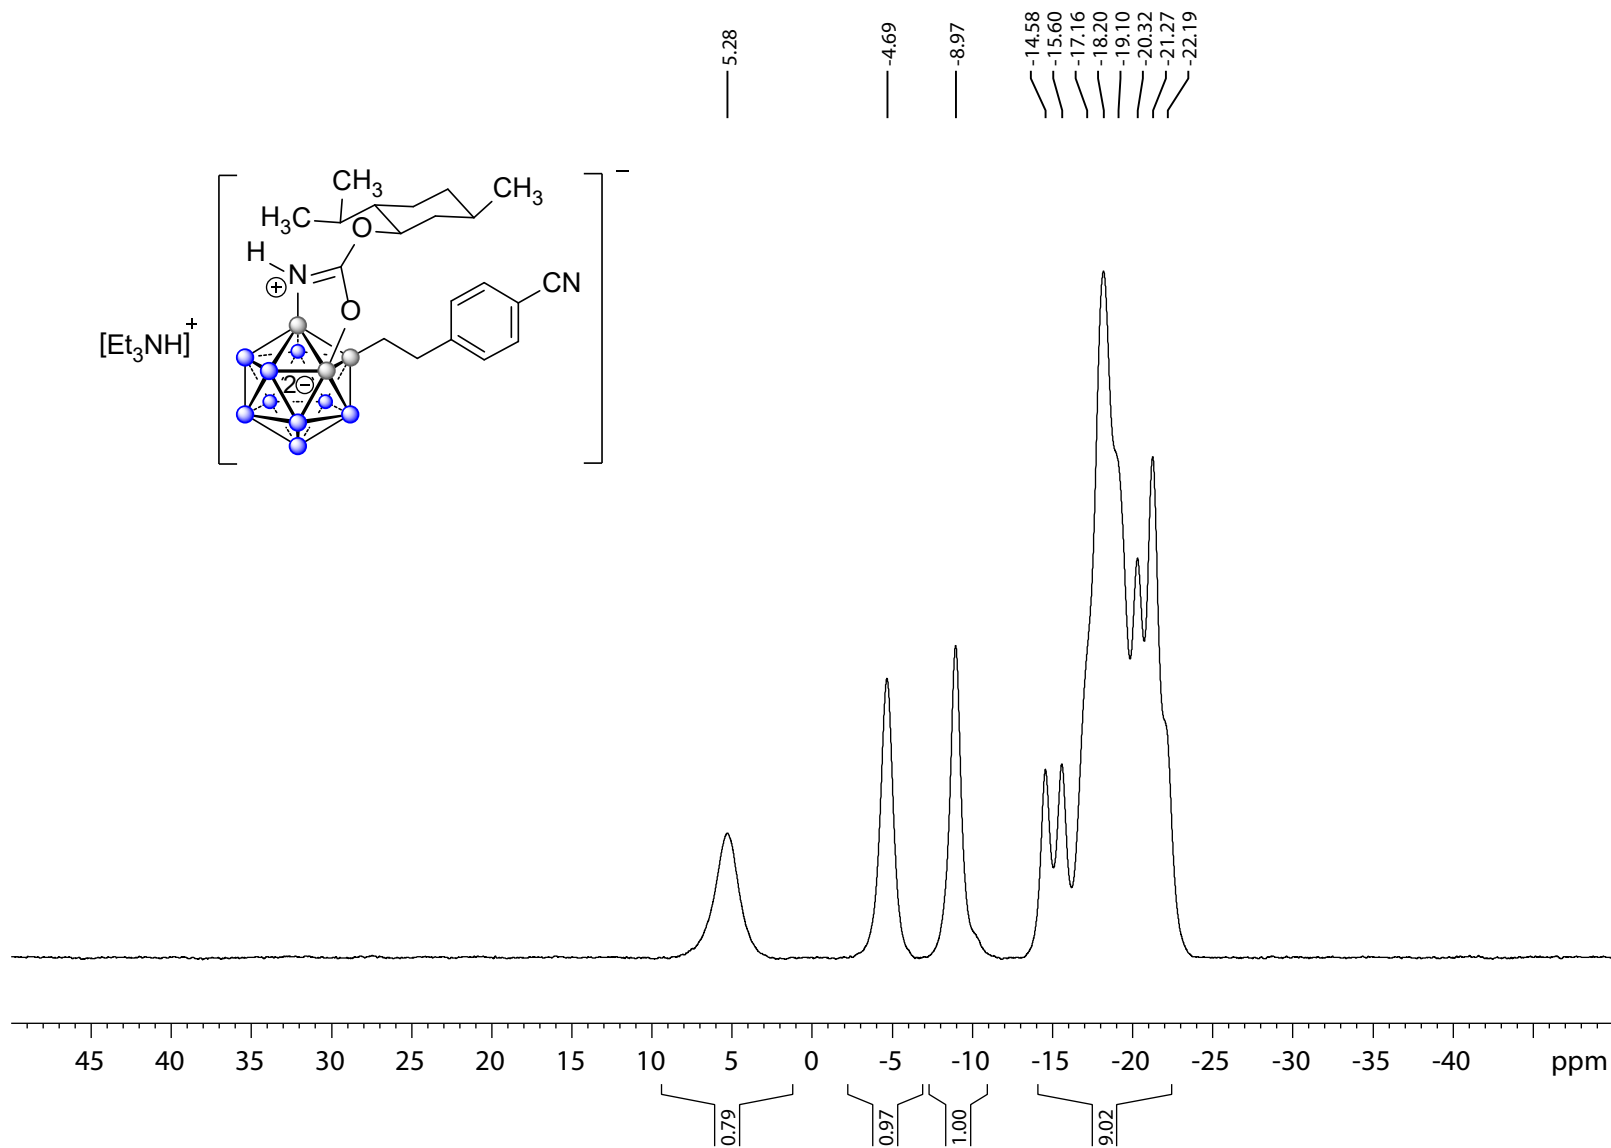

Current Data Parameters  
NAME B12-MENTH-4CN-STYR-II  
EXPNO 3  
PROCNO 1

F2 - Acquisition Parameters  
Date\_ 20190310  
Time\_ 6.21  
INSTRUM spect  
PROBHD 5 mm PABBO BB/  
PULPROG zg  
TD 65536  
SOLVENT Acetone  
NS 128  
DS 4  
SWH 25510.203 Hz  
FIDRES 0.389255 Hz  
AQ 1.2845056 sec  
RG 193.34  
DW 19.600 usec  
DE 6.50 usec  
TE 294.2 K  
D1 1.0000000 sec  
TD0 1

===== CHANNEL f1 =====  
NUC1 11B  
P1 9.93 usec  
PLW1 52.96599960 W  
SFO1 128.3776052 MHz

F2 - Processing parameters  
SI 32768  
SF 128.3776050 MHz  
WDW EM  
SSB 0  
LB 10.00 Hz  
GB 0  
PC 1.40

20190310-B12M-4CNStyr 20 mg white solid [Et<sub>3</sub>NH][B<sub>12</sub>H<sub>10</sub>NHC(Menthyl)OCH<sub>2</sub>CH<sub>2</sub>C<sub>6</sub>H<sub>4</sub>CN] dissolved in 0.6 mL acetone-d<sub>6</sub>\*

11B{<sup>1</sup>H} NMR 128MHz

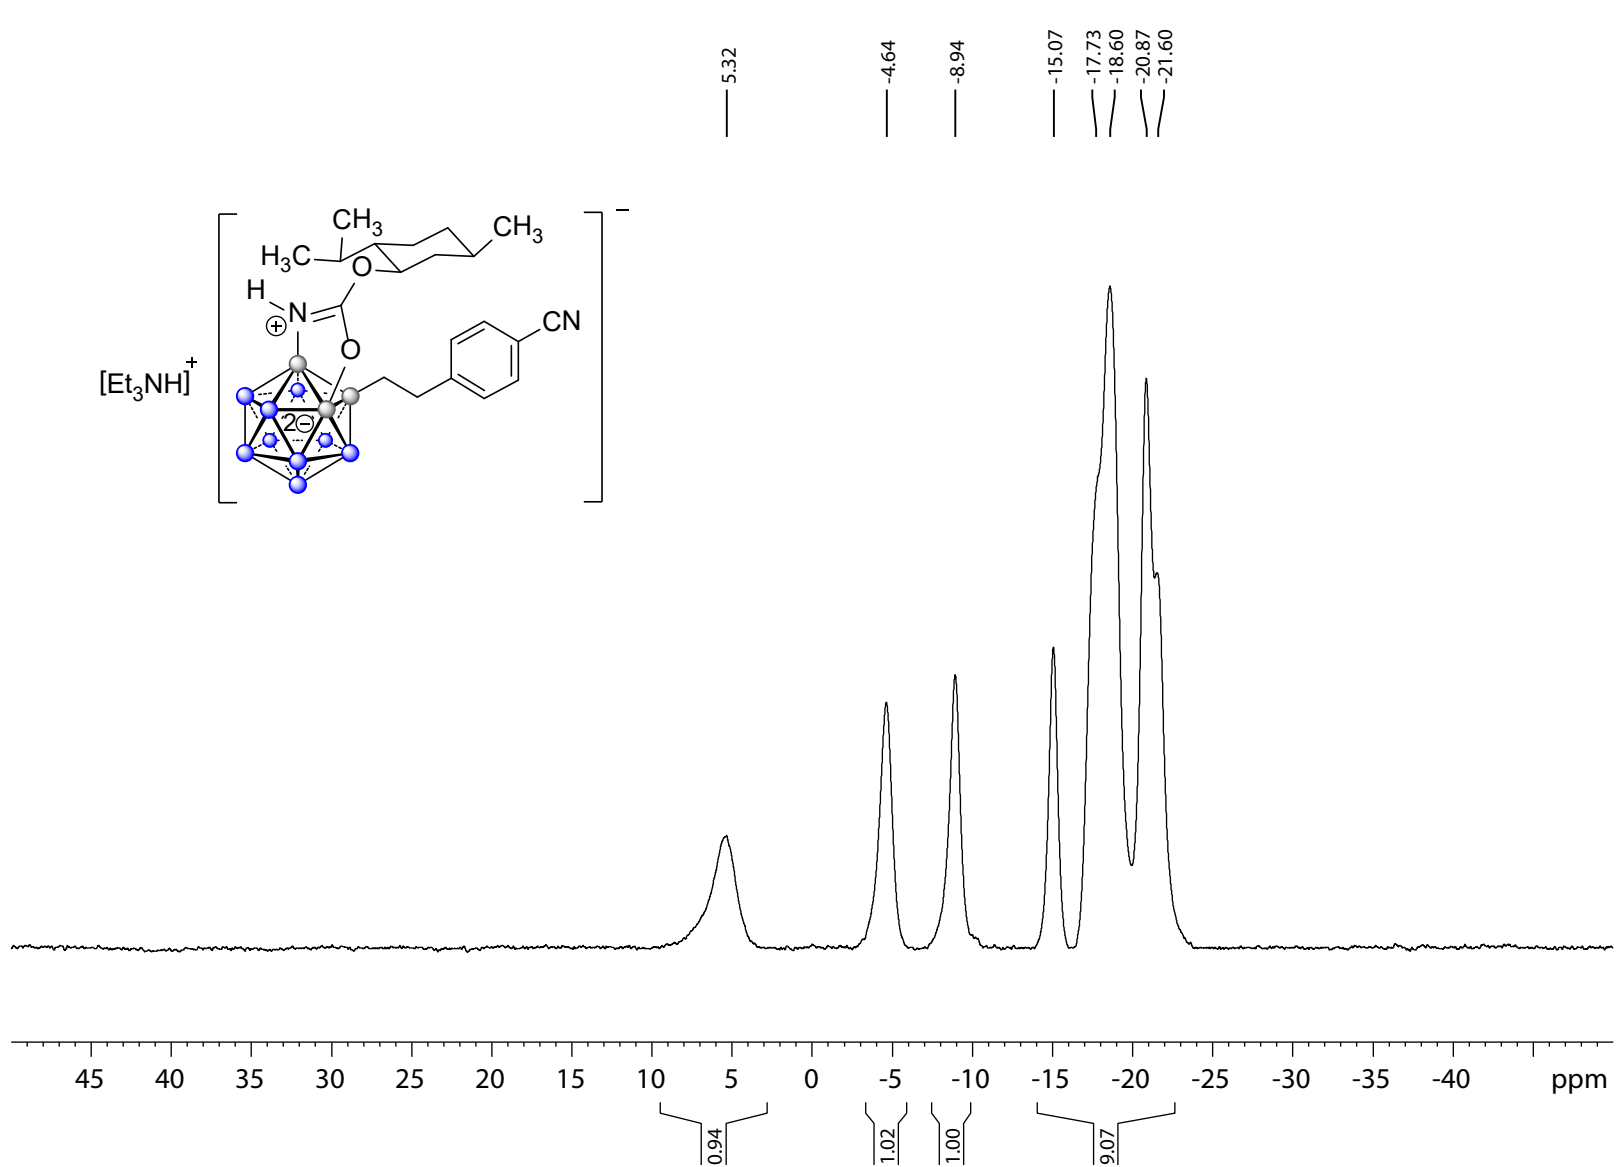

Current Data Parameters  
NAME B12-MENTH-4CN-STYR-II  
EXPNO 4  
PROCNO 1

F2 - Acquisition Parameters  
Date\_ 20190310  
Time 6.27  
INSTRUM spect  
PROBHD 5 mm PABBO BB/  
PULPROG zgpg30  
TD 65536  
SOLVENT Acetone  
NS 128  
DS 4  
SWH 25510.203 Hz  
FIDRES 0.389255 Hz  
AQ 1.2845056 sec  
RG 193.34  
DW 19.600 usec  
DE 6.50 usec  
TE 295.0 K  
D1 1.00000000 sec  
D11 0.03000000 sec  
TD0 1

=====  
CHANNEL f1  
NUC1 11B  
P1 9.93 usec  
PLW1 52.96599960 W  
SFO1 128.3776050 MHz

=====  
CHANNEL f2  
CPDPRG[2] waltz16  
NUC2 1H  
PCPD2 80.00 usec  
PLW2 12.50000000 W  
PLW12 0.43945000 W  
PLW13 0.28125000 W  
SFO2 400.1320007 MHz

F2 - Processing parameters  
SI 32768  
SF 128.3776050 MHz  
WDW EM  
SSB 0  
LB 10.00 Hz  
GB 0  
PC 1.40

20190310-B12M-4CNStyr 20 mg white solid [Et<sub>3</sub>NH][B<sub>12</sub>H<sub>10</sub>NHC(Menthyl)OCH<sub>2</sub>CH<sub>2</sub>C<sub>6</sub>H<sub>4</sub>CN] dissolved in 0.6 mL acetone-d<sub>6</sub>\*

<sup>13</sup>C{<sup>1</sup>H} NMR 100 MHz

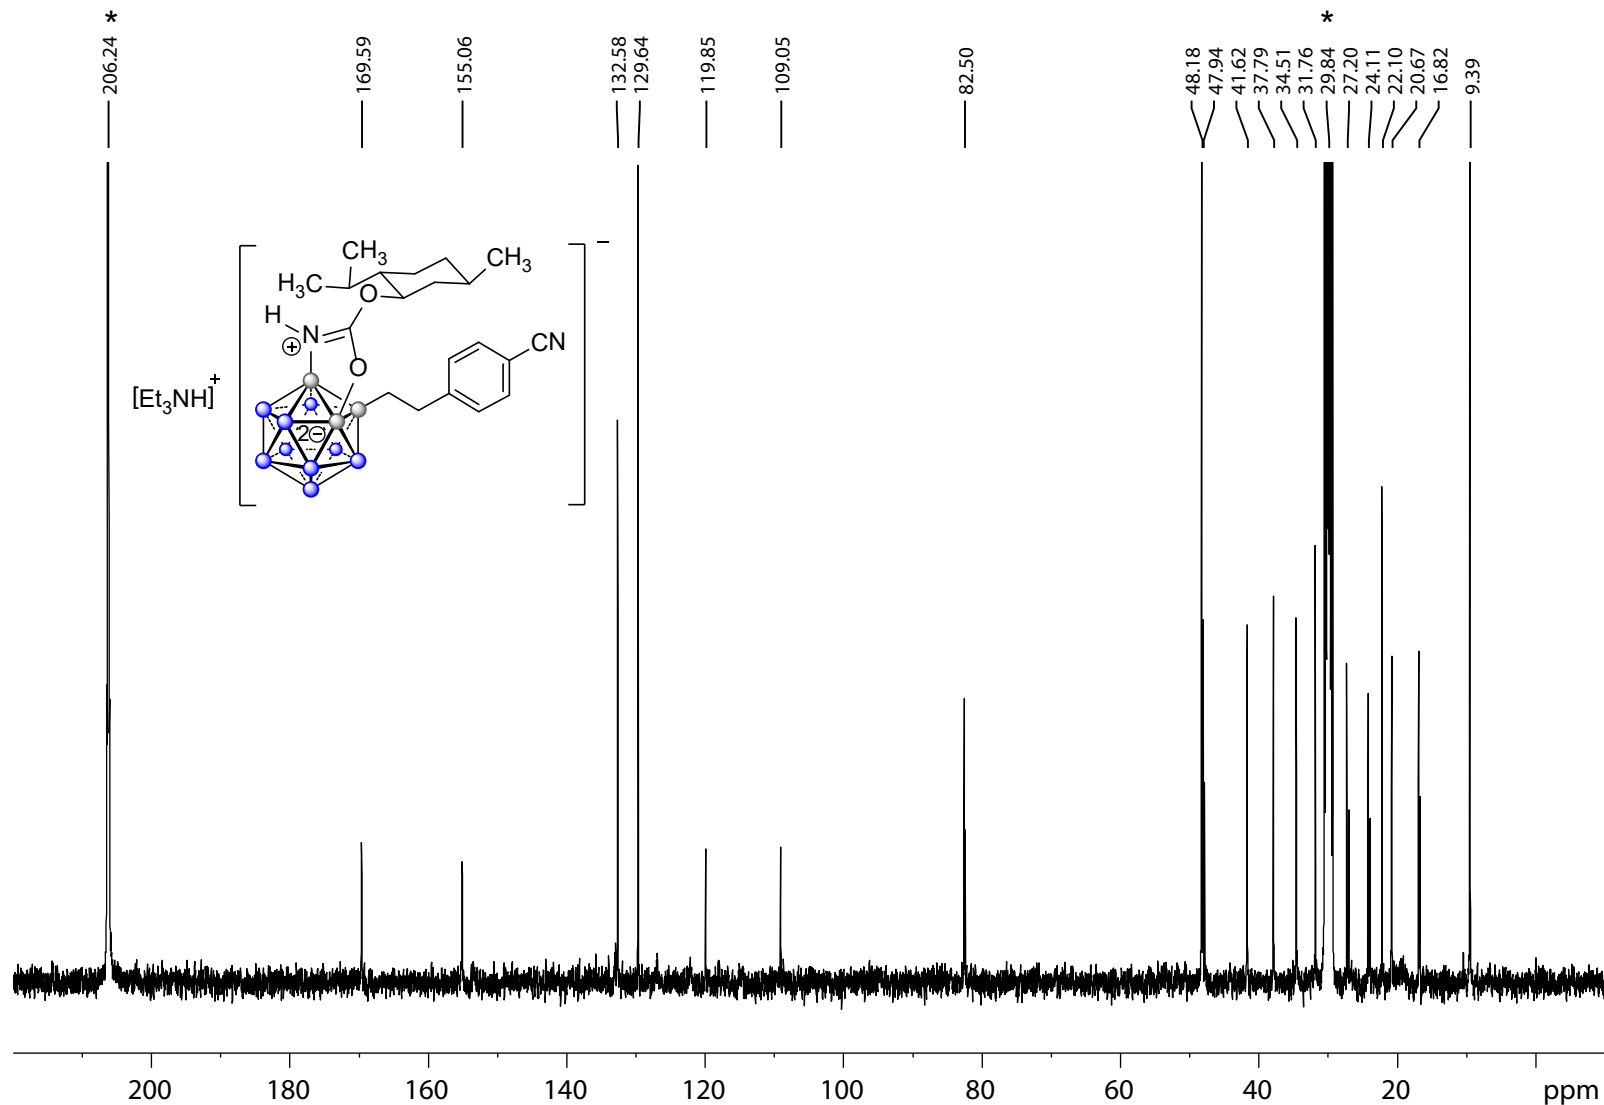

Current Data Parameters  
 NAME B12-MENTH-4CN-STYR-II  
 EXPNO 5  
 PROCNO 1

F2 - Acquisition Parameters  
 Date\_ 20190310  
 Time\_ 8.00  
 INSTRUM spect  
 PROBHD 5 mm PABBO BB/  
 PULPROG zgpg30  
 TD 65536  
 SOLVENT Acetone  
 NS 2048  
 DS 4  
 SWH 29761.904 Hz  
 FIDRES 0.454131 Hz  
 AQ 1.1010048 sec  
 RG 193.34  
 DW 16.800 usec  
 DE 6.50 usec  
 TE 295.0 K  
 D1 1.50000000 sec  
 D11 0.03000000 sec  
 TD0 1

==== CHANNEL f1 =====  
 NUC1 13C  
 P1 10.00 usec  
 PLW1 53.00000000 W  
 SFO1 100.6228293 MHz

==== CHANNEL f2 =====  
 CPDPRG[2] waltz16  
 NUC2 1H  
 PCPD2 80.00 usec  
 PLW2 12.50000000 W  
 PLW12 0.43945000 W  
 PLW13 0.28125000 W  
 SFO2 400.1316005 MHz

F2 - Processing parameters  
 SI 32768  
 SF 100.6126831 MHz  
 WDW EM  
 SSB 0  
 LB 2.00 Hz  
 GB 0  
 PC 1.40

20190310-B12M-4CNStyr 20 mg white solid [Et<sub>3</sub>NH][B<sub>12</sub>H<sub>10</sub>NHC(Menthyl)OCH<sub>2</sub>CH<sub>2</sub>C<sub>6</sub>H<sub>4</sub>CN] dissolved in 0.6 mL acetone-d<sub>6</sub>\*

<sup>13</sup>C DEPT NMR 100 MHz

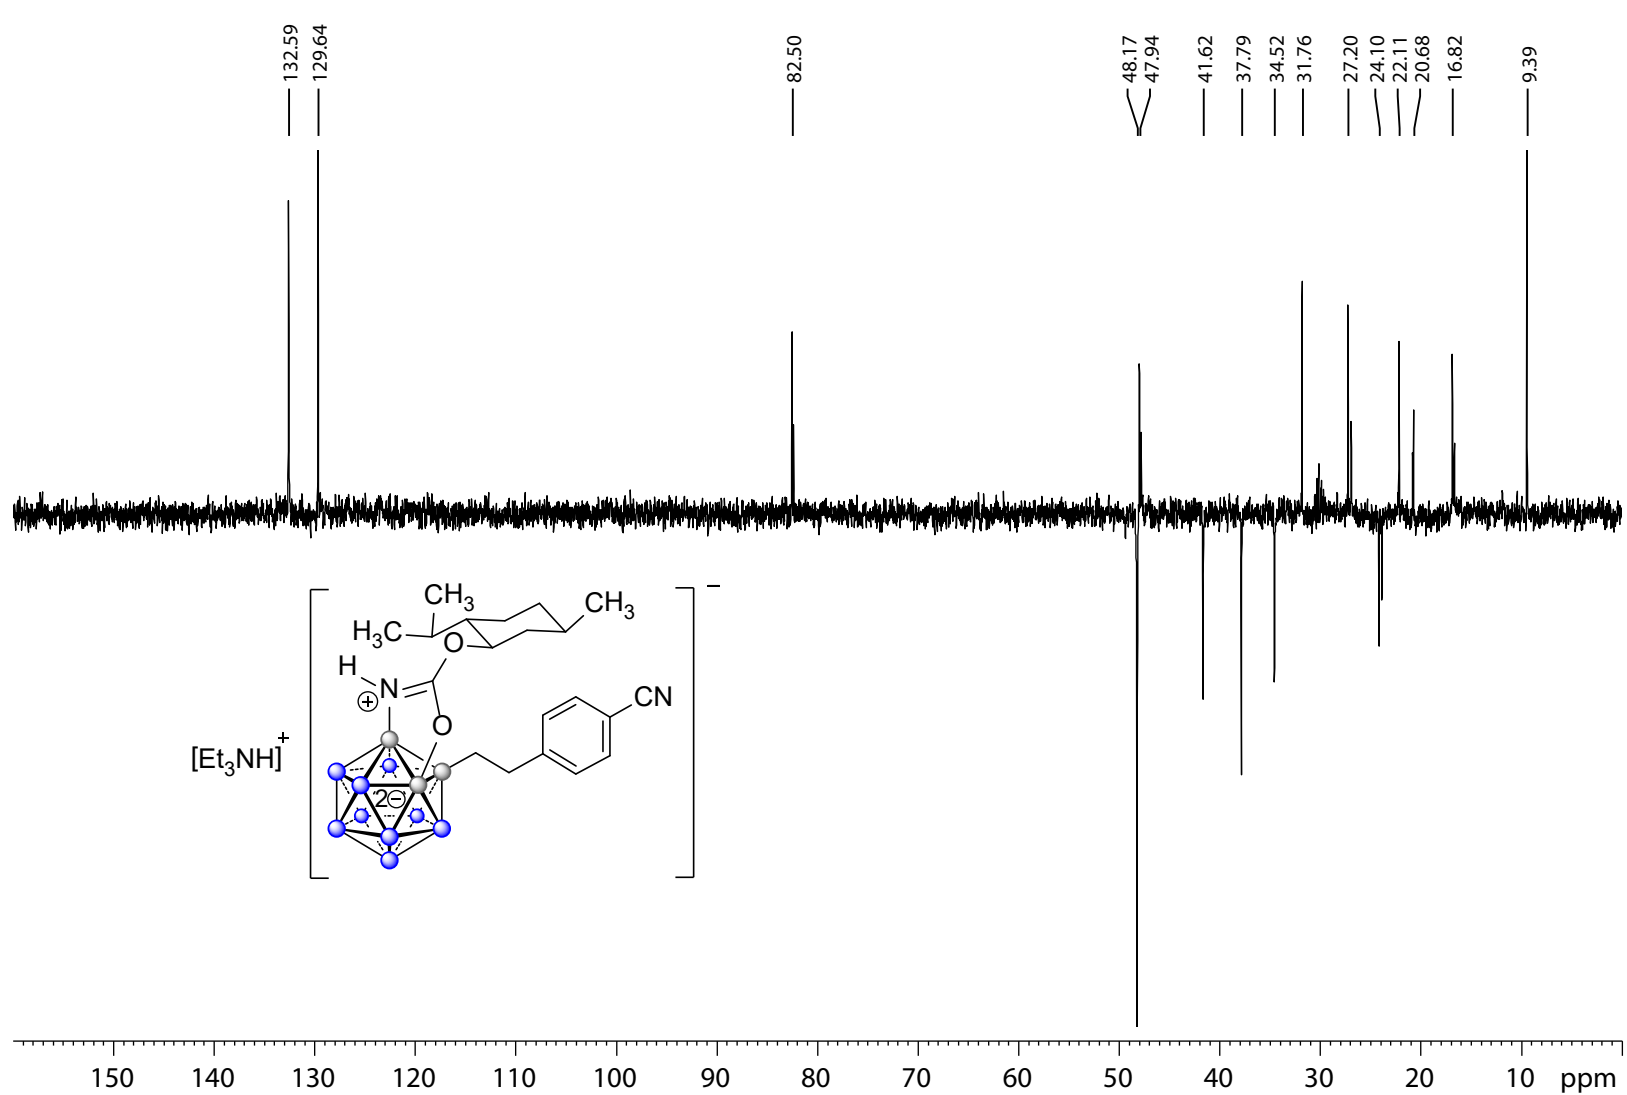

Current Data Parameters  
NAME B12-MENTH-4CN-STYR-II  
EXPNO 6  
PROCNO 1

F2 - Acquisition Parameters  
Date\_ 20190310  
Time 8.14  
INSTRUM spect  
PROBHD 5 mm PABBO BB/  
PULPROG dept135  
TD 65536  
SOLVENT Acetone  
NS 256  
DS 4  
SWH 29296.875 Hz  
FIDRES 0.447035 Hz  
AQ 1.1184810 sec  
RG 193.34  
DW 17.067 usec  
DE 6.50 usec  
TE 294.4 K  
CNST2 145.0000000  
D1 2.00000000 sec  
D2 0.00344828 sec  
D12 0.00002000 sec  
TDO 1

===== CHANNEL f1 =====  
NUC1 13C  
P1 10.00 usec  
P2 20.00 usec  
PLW1 53.00000000 W  
SFO1 100.6228293 MHz

===== CHANNEL f2 =====  
CPDPRG[2] waltz16  
NUC2 1H  
P3 15.00 usec  
P4 30.00 usec  
PCPD2 80.00 usec  
PLW2 12.50000000 W  
PLW12 0.43945000 W  
SFO2 400.1316005 MHz

F2 - Processing parameters  
SI 32768  
SF 100.6126829 MHz  
WDW EM  
SSB 0  
LB 2.00 Hz  
GB 0  
PC 4.00

<sup>1</sup>H - <sup>1</sup>H COSY NMR

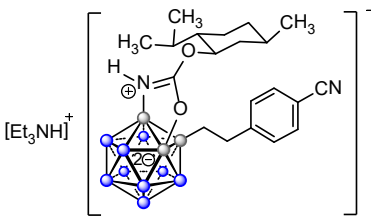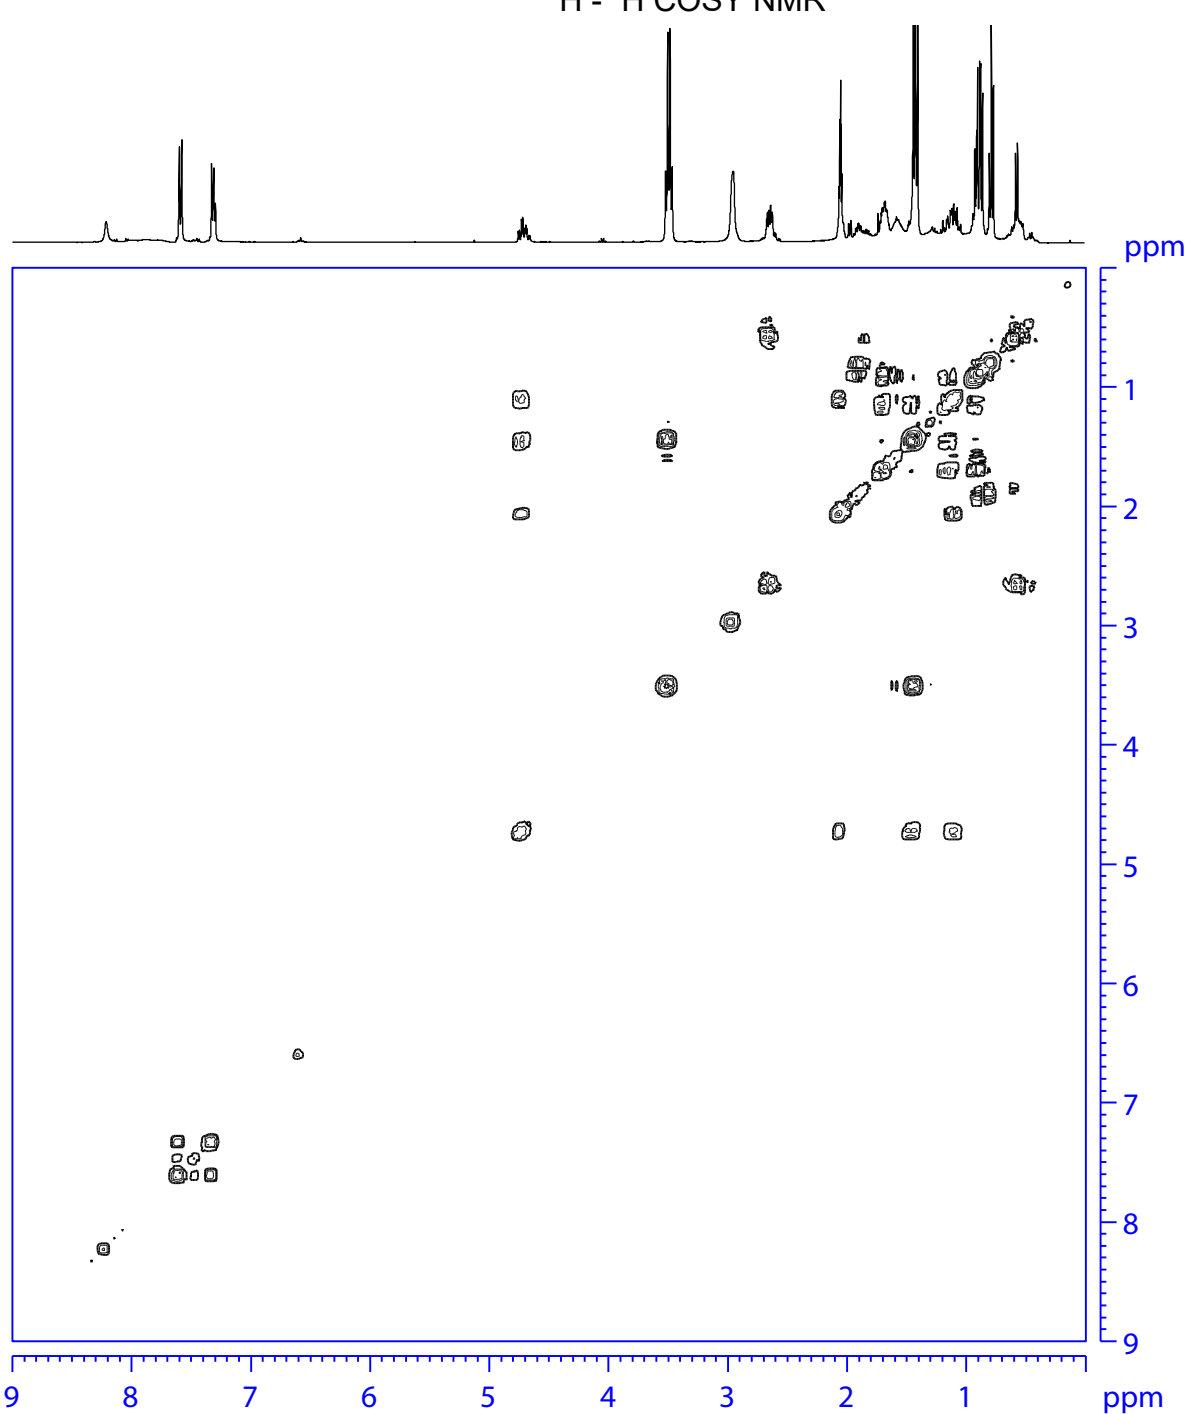

Current Data Parameters  
 NAME B12-MENTH-4CN-STYR-II  
 EXPNO 7  
 PROCNO 1

F2 - Acquisition Parameters  
 Date\_ 20190310  
 Time\_ 8.15  
 INSTRUM spect  
 PROBHD 5 mm PABBO BB/  
 PULPROG cosygpppqf  
 TD 2048  
 SOLVENT Acetone  
 NS 2  
 DS 8  
 SWH 5341.880 Hz  
 FIDRES 2.608340 Hz  
 AQ 0.1916928 sec  
 RG 170.36  
 DW 93.600 usec  
 DE 6.50 usec  
 TE 294.2 K  
 D0 0.0000300 sec  
 D1 2.0000000 sec  
 D11 0.0300000 sec  
 D12 0.0000200 sec  
 D13 0.0000400 sec  
 D16 0.0002000 sec  
 IN0 0.00018720 sec

===== CHANNEL f1 =====  
 NUC1 1H  
 P0 15.00 usec  
 P1 15.00 usec  
 P17 2500.00 usec  
 PLW1 12.5000000 W  
 PLW10 4.16050005 W  
 SFO1 400.1324057 MHz

===== GRADIENT CHANNEL =====  
 GPNAM[1] SMSQ10.100  
 GPZ1 10.00 %  
 P16 1000.00 usec

F1 - Acquisition parameters  
 TD 128  
 SFO1 400.1324 MHz  
 FIDRES 83.466881 Hz  
 SW 13.350 ppm  
 FhMODE QF

F2 - Processing parameters  
 SI 1024  
 SF 400.1300000 MHz  
 WDW QSINE  
 SSB 0  
 LB 0 Hz  
 GB 0  
 PC 1.40

F1 - Processing parameters  
 SI 1024  
 MC2 QF  
 SF 400.1300000 MHz  
 WDW QSINE  
 SSB 0  
 LB 0 Hz  
 GB 0

$^1H - ^{13}C$  HSQC NMR

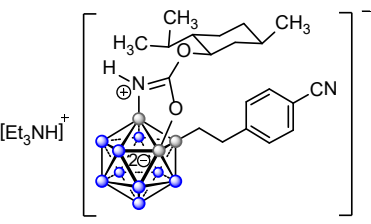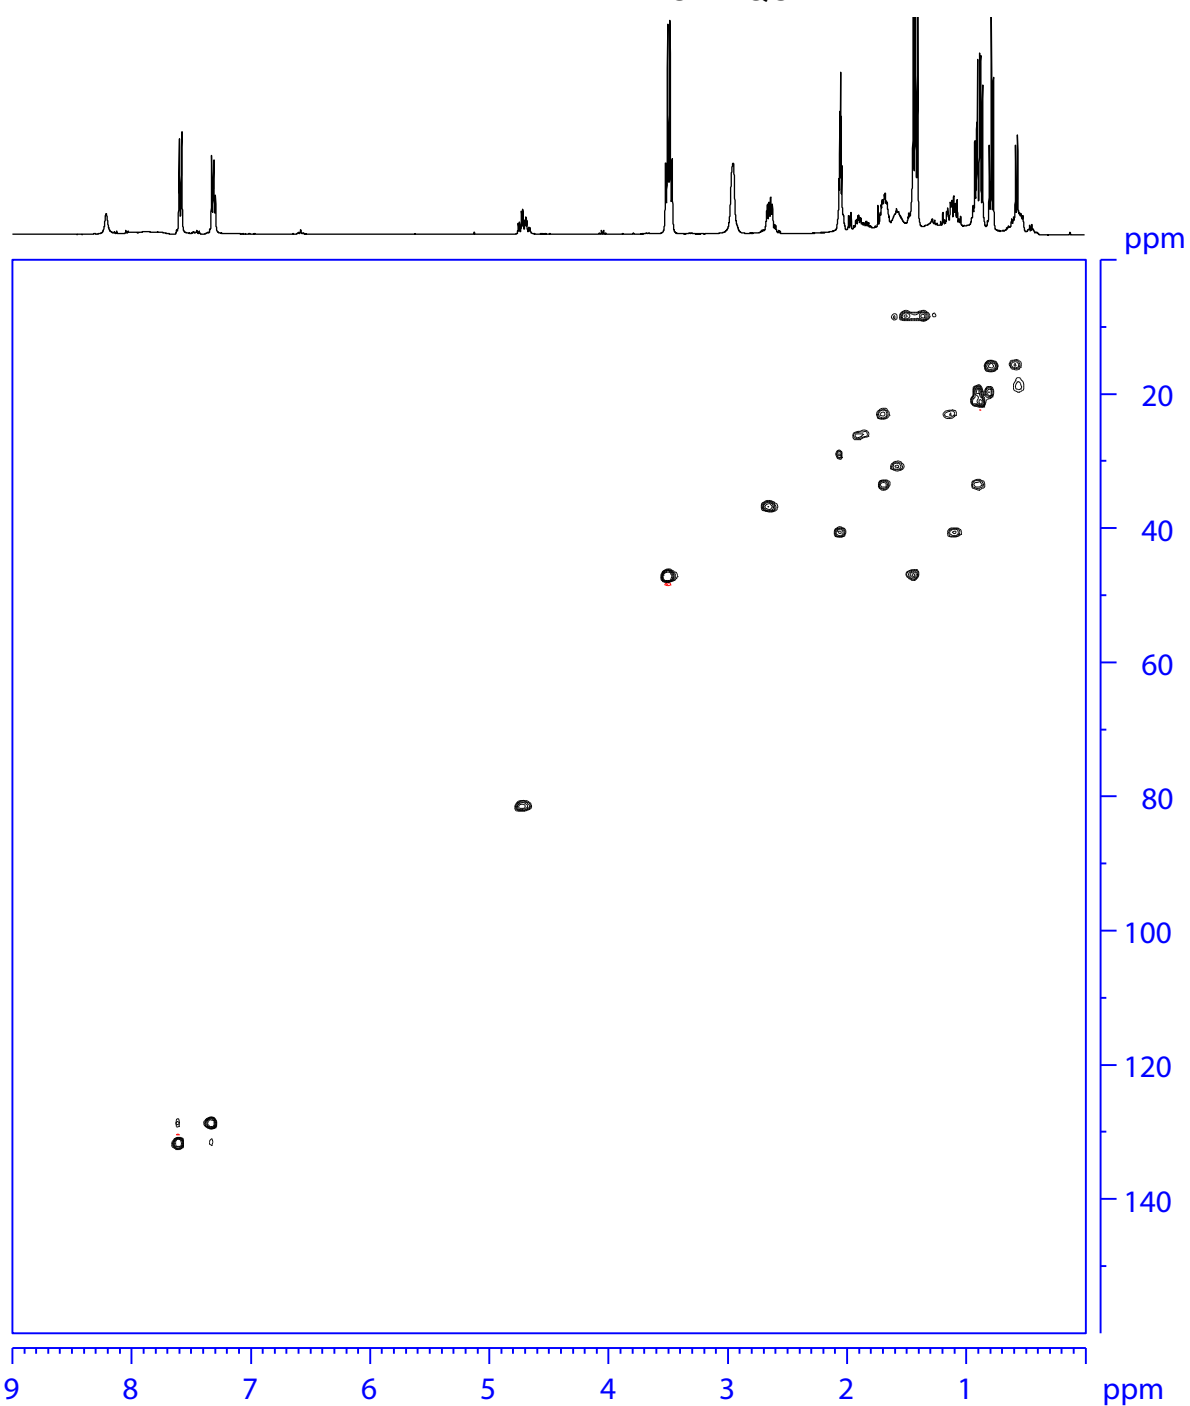

```

Current Data Parameters
NAME      B12-MENTH-4CN-STYR-II
EXPNO    8
PROCNO   1

F2 - Acquisition Parameters
Date_    20190310
Time     8.26
INSTRUM  spect
PROBHD   5 mm FAPBO BB/
PULPROG  hsqcetgpsi2
TD       1024
SOLVENT  Acetone
NS       2
DS       16
SWH      6009.615 Hz
FIDRES   5.868765 Hz
AQ       0.0851968 sec
RG       193.34
DW       83.200 usec
DE       6.50 usec
TE       294.6 K
CNST2    145.000000
DO       0.0000300 sec
D1       1.5000000 sec
D4       0.00172414 sec
D11      0.03000000 sec
D16      0.00020000 sec
D24      0.00086207 sec
IN0      0.00001990 sec
ZGOPTNS

===== CHANNEL f1 =====
NUC1     1H
P1       15.00 usec
P2       30.00 usec
P28      1000.00 usec
PLW1     12.5000000 W
SFO1     400.1328009 MHz

===== CHANNEL f2 =====
CPDPRG2  garp
NUC2     13C
P3       10.00 usec
P4       20.00 usec
PCPD2    70.00 usec
PLW2     53.0000000 W
PLWL2    1.08159995 W
SFO2     100.6238364 MHz

===== GRADIENT CHANNEL =====
GPNAM[1] SMSQ10.100
GPNAM[2] SMSQ10.100
GPNAM[3] SMSQ10.100
GPNAM[4] SMSQ10.100
GP21     80.00 %
GP22     20.10 %
GP23     11.00 %
GP24     -5.00 %
P16      1000.00 usec
P19      600.00 usec

F1 - Acquisition parameters
TD       256
SFO1     100.6238 MHz
FIDRES   196.524048 Hz
SW       249.991 ppm
FnMODE   Echo-Antiecho

F2 - Processing parameters
SI       1024
SF       400.1300000 MHz
WDW      QSINE
SSB      2
LB       0 Hz
GB       0
PC       1.40

F1 - Processing parameters
SI       1024
MC2      echo-antiecho
SF       100.6127690 MHz
WDW      QSINE
SSB      2
LB       0 Hz
GB       0
    
```

20190323-B12M-4tBuMeStyr 20 mg white solid [Et<sub>3</sub>NH][B<sub>12</sub>H<sub>10</sub>NHC(Menthyl)OCH<sub>2</sub>CH<sub>2</sub>C<sub>6</sub>H<sub>4</sub>Bu] dissolved in 0.6 mL acetone-d<sub>6</sub>\*

400MHz <sup>1</sup>H NMR, o deuterated solvent residual peak= 2.05 ppm; ◇ water peak

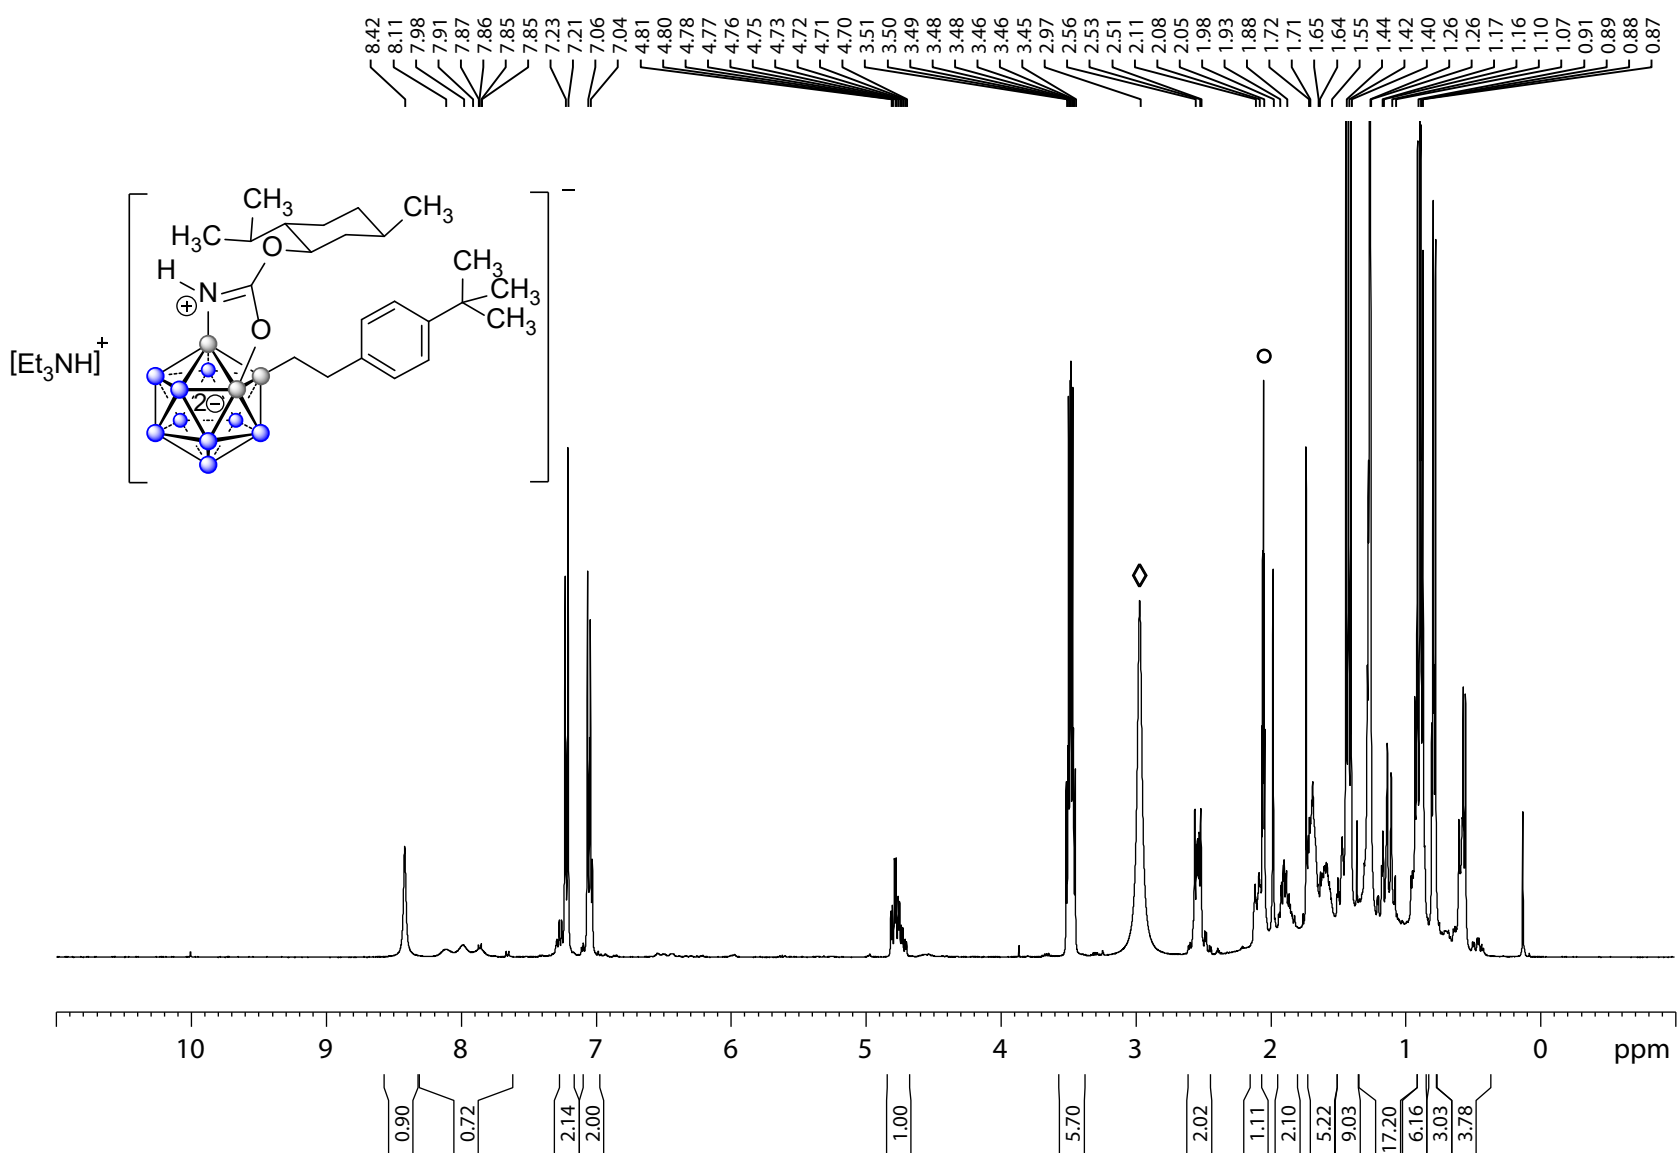

Current Data Parameters  
 NAME 20190323-RV-B12Menth-4BuStyr  
 EXPNO 1  
 PROCNO 1

F2 - Acquisition Parameters  
 Date\_ 20190324  
 Time\_ 6.33  
 INSTRUM spect  
 PROBHD 5 mm PABBO BB/  
 PULPROG zg30  
 TD 65536  
 SOLVENT Acetone  
 NS 16  
 DS 2  
 SWH 10000.000 Hz  
 FIDRES 0.152588 Hz  
 AQ 3.2767999 sec  
 RG 71.39  
 DW 50.000 usec  
 DE 6.50 usec  
 TE 295.7 K  
 D1 1.00000000 sec  
 TDO 1

===== CHANNEL f1 =====  
 NUC1 1H  
 P1 15.00 usec  
 PLW1 12.5000000 W  
 SFO1 400.1328009 MHz

F2 - Processing parameters  
 SI 65536  
 SF 400.1300070 MHz  
 WDW EM  
 SSB 0  
 LB 0.30 Hz  
 GB 0  
 PC 1.00



20190323-B12M-4tBuMeStyr 20 mg white solid  $[\text{Et}_3\text{NH}][\text{B}_{12}\text{H}_{10}\text{NHC}(\text{Menthyl})\text{OCH}_2\text{CH}_2\text{C}_6\text{H}_4\text{Bu}]$  dissolved in 0.6 mL acetone- $d_6^*$

400MHz  $^1\text{H}\{\text{B}\}$  NMR,  $\circ$  deuterated solvent residual peak = 2.05 ppm;  $\diamond$  water peak

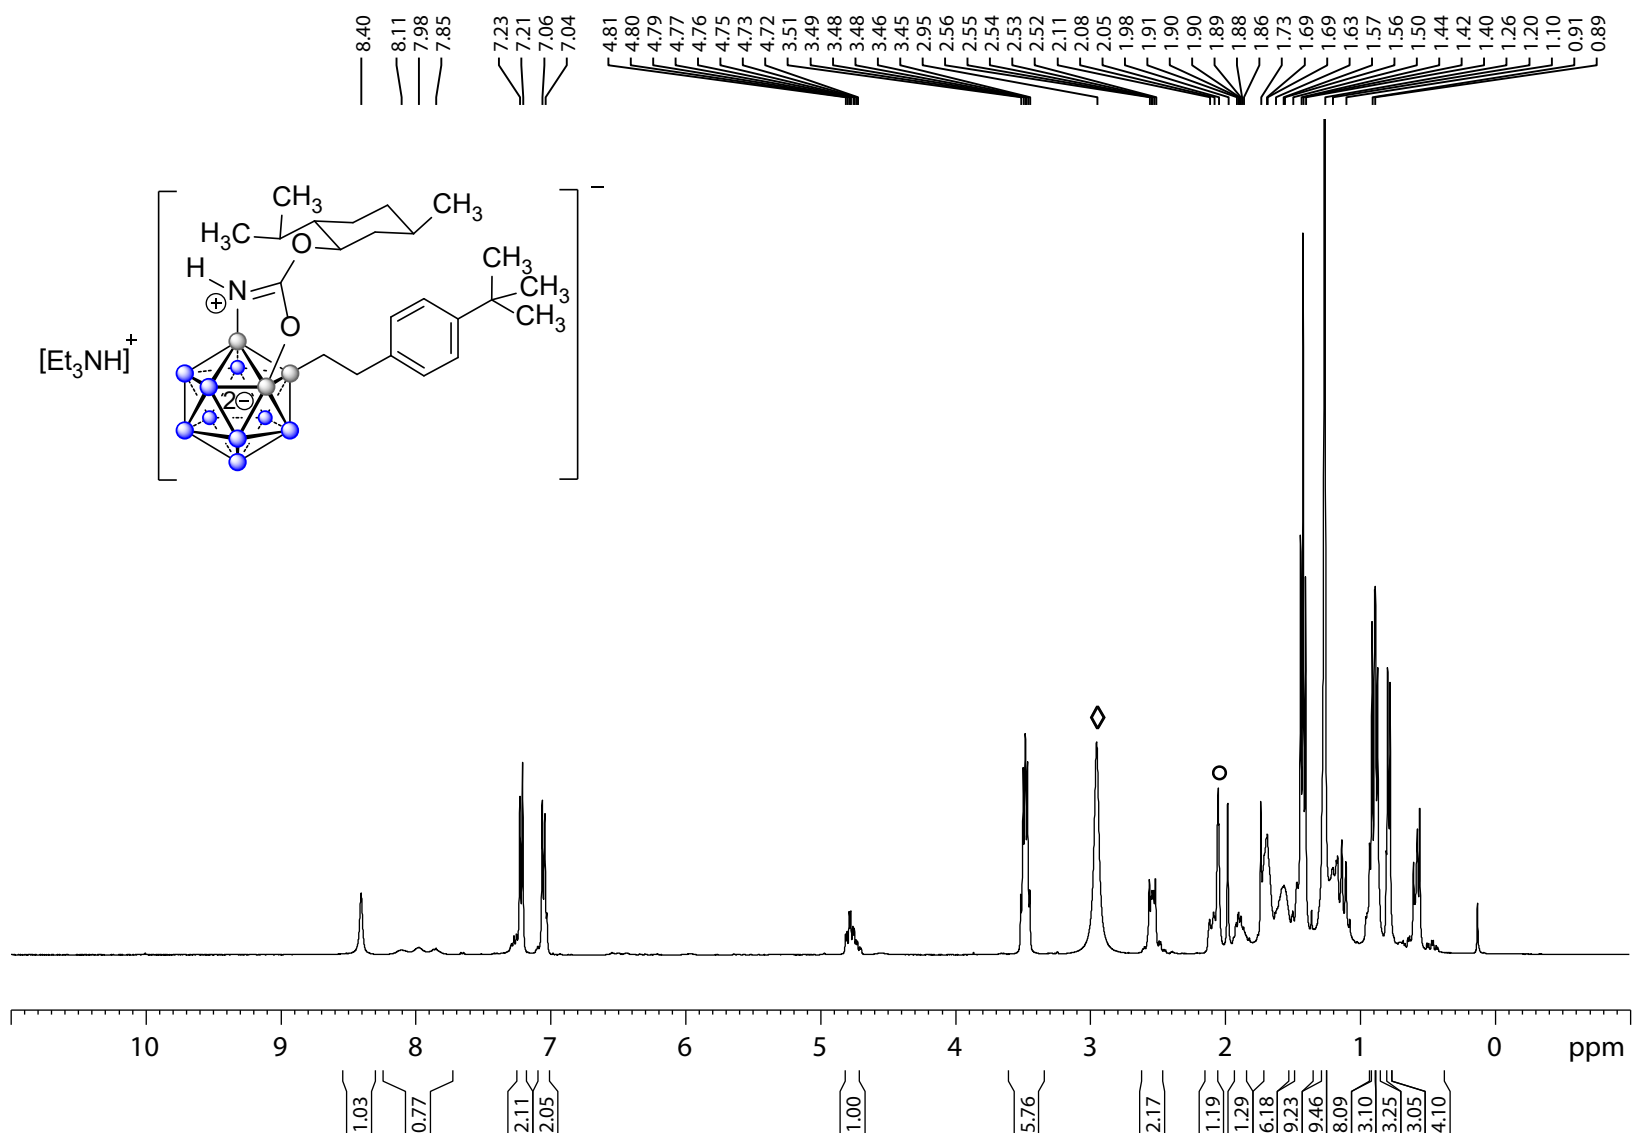

Current Data Parameters  
 NAME 20190323-RV-B12Menth-4BuStyr  
 EXPNO 2  
 PROCNO 1

F2 - Acquisition Parameters  
 Date\_ 20190324  
 Time\_ 6.35  
 INSTRUM spect  
 PROBHD 5 mm PABBO BB/  
 PULPROG zgig30  
 TD 16384  
 SOLVENT Acetone  
 NS 16  
 DS 4  
 SWH 8012.820 Hz  
 FIDRES 0.489064 Hz  
 AQ 1.0223616 sec  
 RG 78.69  
 DW 62.400 usec  
 DE 6.50 usec  
 TE 296.0 K  
 D1 1.00000000 sec  
 D11 0.03000000 sec  
 TD0 1

==== CHANNEL f1 =====  
 NUC1 1H  
 P1 15.00 usec  
 PLW1 12.50000000 W  
 SFO1 400.1320007 MHz

==== CHANNEL f2 =====  
 CPDPRG[2] garp4  
 NUC2 11B  
 PCPD2 90.00 usec  
 PLW2 52.96599960 W  
 PLW12 0.64477998 W  
 SFO2 128.3776050 MHz

F2 - Processing parameters  
 SI 32768  
 SF 400.1300071 MHz  
 WDW EM  
 SSB 0  
 LB 1.00 Hz  
 GB 0  
 PC 1.40

20190323-B12M-4tBuMeStyr 20 mg white solid  $[\text{Et}_3\text{NH}][\text{B}_{12}\text{H}_{10}\text{NHC}(\text{Menthyl})\text{OCH}_2\text{CH}_2\text{C}_6\text{H}_4\text{Bu}]$  dissolved in 0.6 mL acetone- $d_6^*$

$^{11}\text{B}$  NMR 128 MHz

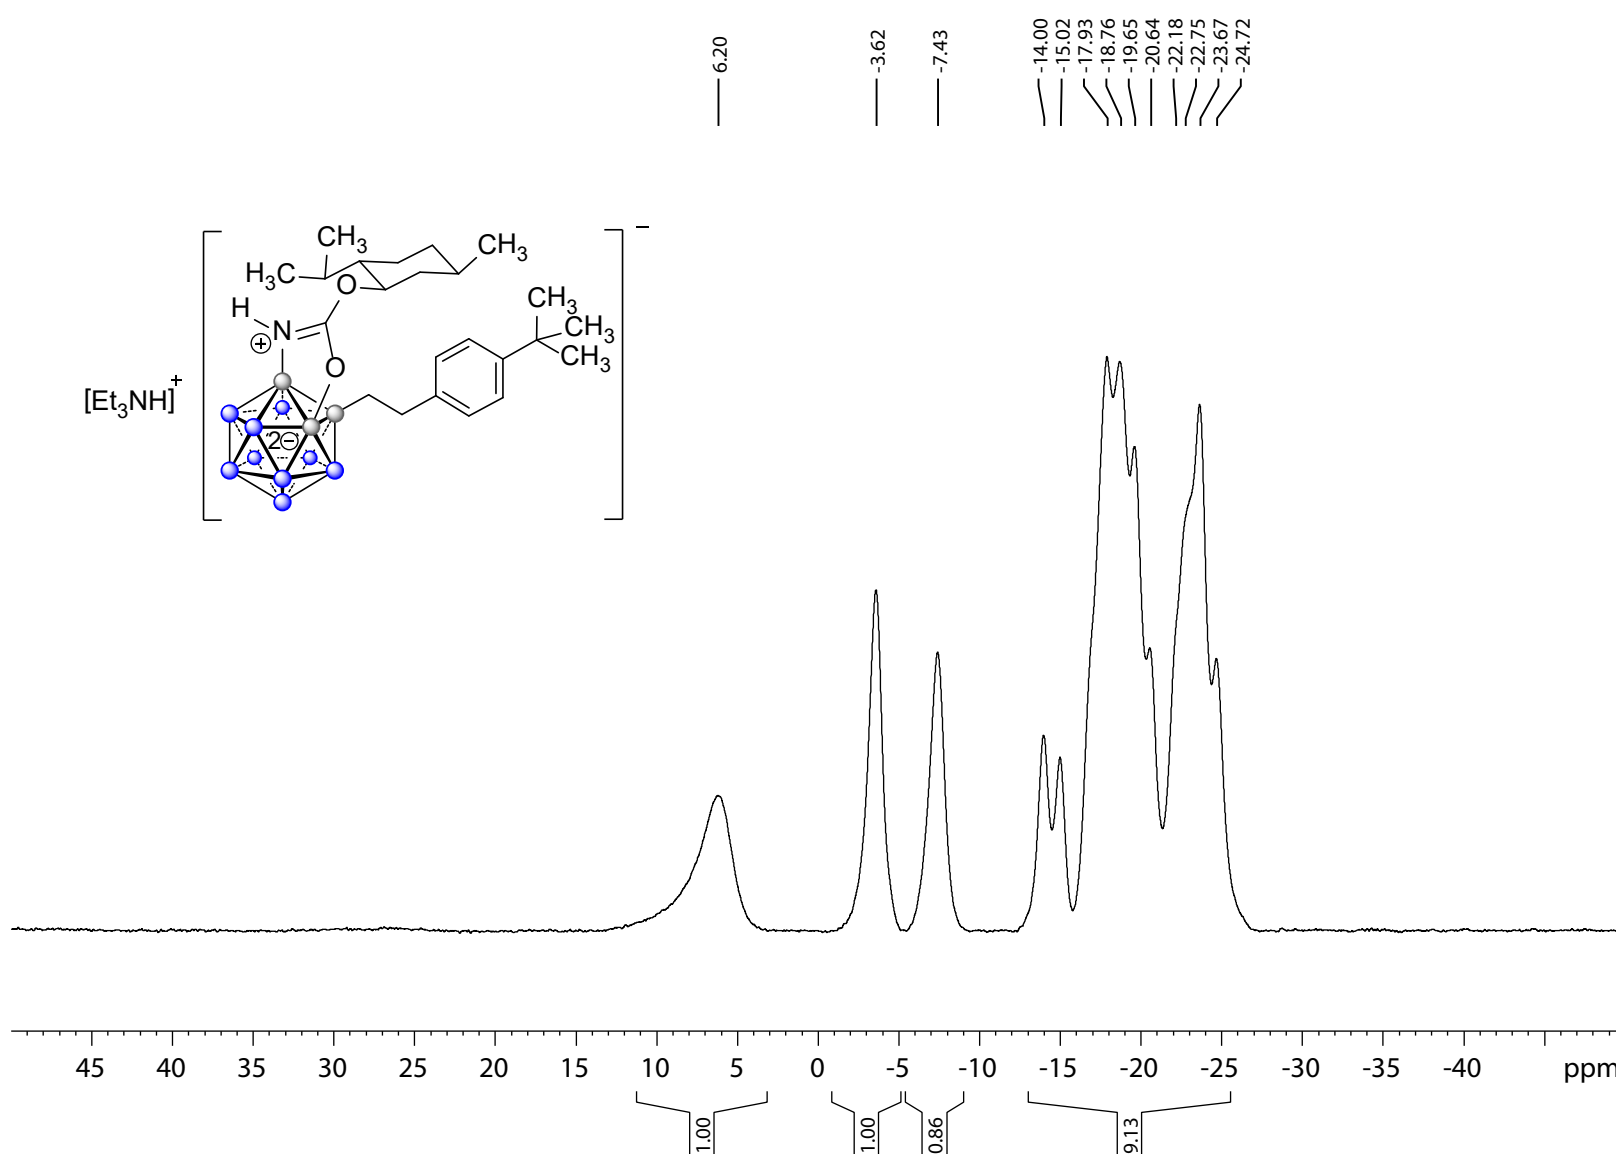

Current Data Parameters  
 NAME 20190323-RV-B12Menth-4BuStyr  
 EXPNO 3  
 PROCNO 1

F2 - Acquisition Parameters  
 Date\_ 20190324  
 Time 6.41  
 INSTRUM spect  
 PROBHD 5 mm PABBO BB/  
 PULPROG zg  
 TD 65536  
 SOLVENT Acetone  
 NS 128  
 DS 4  
 SWH 25510.203 Hz  
 FIDRES 0.389255 Hz  
 AQ 1.2845056 sec  
 RG 193.34  
 DW 19.600 usec  
 DE 6.50 usec  
 TE 295.7 K  
 D1 1.00000000 sec  
 TDO 1

==== CHANNEL f1 =====  
 NUC1 11B  
 P1 9.93 usec  
 PLW1 52.96599960 W  
 SFO1 128.3776052 MHz

F2 - Processing parameters  
 SI 32768  
 SF 128.3776050 MHz  
 WDW EM  
 SSB 0  
 LB 10.00 Hz  
 GB 0  
 PC 1.40

20190323-B12M-4tBuMeStyr 20 mg white solid [Et<sub>3</sub>NH][B<sub>12</sub>H<sub>10</sub>NHC(Menthyl)OCH<sub>2</sub>CH<sub>2</sub>C<sub>6</sub>H<sub>4</sub>Bu] dissolved in 0.6 mL acetone-d<sub>6</sub>\*

<sup>11</sup>B{H} NMR 128 MHz

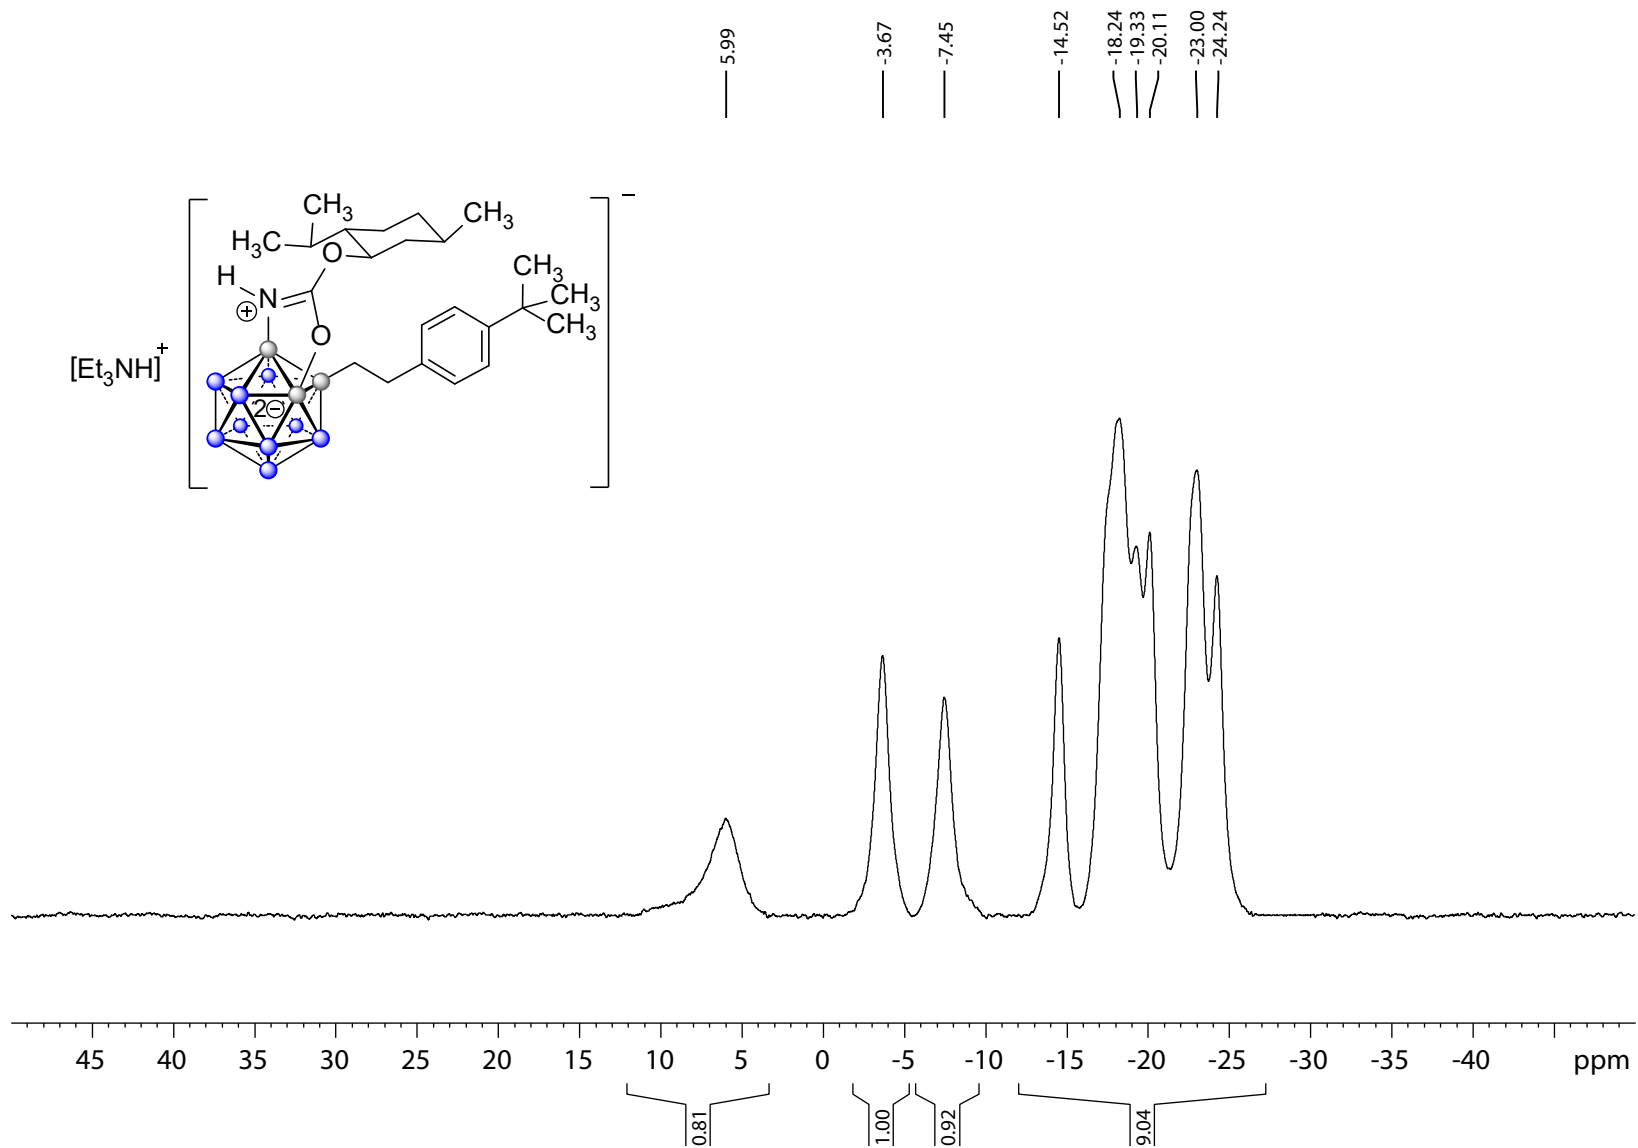

```
Current Data Parameters
NAME      20190323-RV-B12Menth-4BuStyr
EXPNO    4
PROCNO   1

F2 - Acquisition Parameters
Date_    20190324
Time     6.47
INSTRUM  spect
PROBHD   5 mm PABBO BB/
PULPROG  zgpg30
TD       65536
SOLVENT  Acetone
NS       128
DS       4
SWH      25510.203 Hz
FIDRES   0.389255 Hz
AQ       1.2845056 sec
RG       193.34
DW       19.600 usec
DE       6.50 usec
TE       296.5 K
D1       1.00000000 sec
D11      0.03000000 sec
TD0      1

===== CHANNEL f1 =====
NUC1     11B
P1       9.93 usec
PLW1     52.96599960 W
SFO1     128.3776050 MHz

===== CHANNEL f2 =====
CPDPRG[2] waltz16
NUC2     1H
PCPD2    80.00 usec
PLW2     12.50000000 W
PLW12    0.43945000 W
PLW13    0.28125000 W
SFO2     400.1320007 MHz

F2 - Processing parameters
SI       32768
SF       128.3776050 MHz
WDW      EM
SSB      0
LB       10.00 Hz
GB       0
PC       1.40
```

20190323-B12M-4tBuMeStyr 20 mg white solid [Et<sub>3</sub>NH][B<sub>12</sub>H<sub>10</sub>NHC(Menthyl)OCH<sub>2</sub>CH<sub>2</sub>C<sub>6</sub>H<sub>4</sub>Bu] dissolved in 0.6 mL acetone-d<sub>6</sub>\*

<sup>13</sup>C{<sup>1</sup>H} NMR 100 MHz

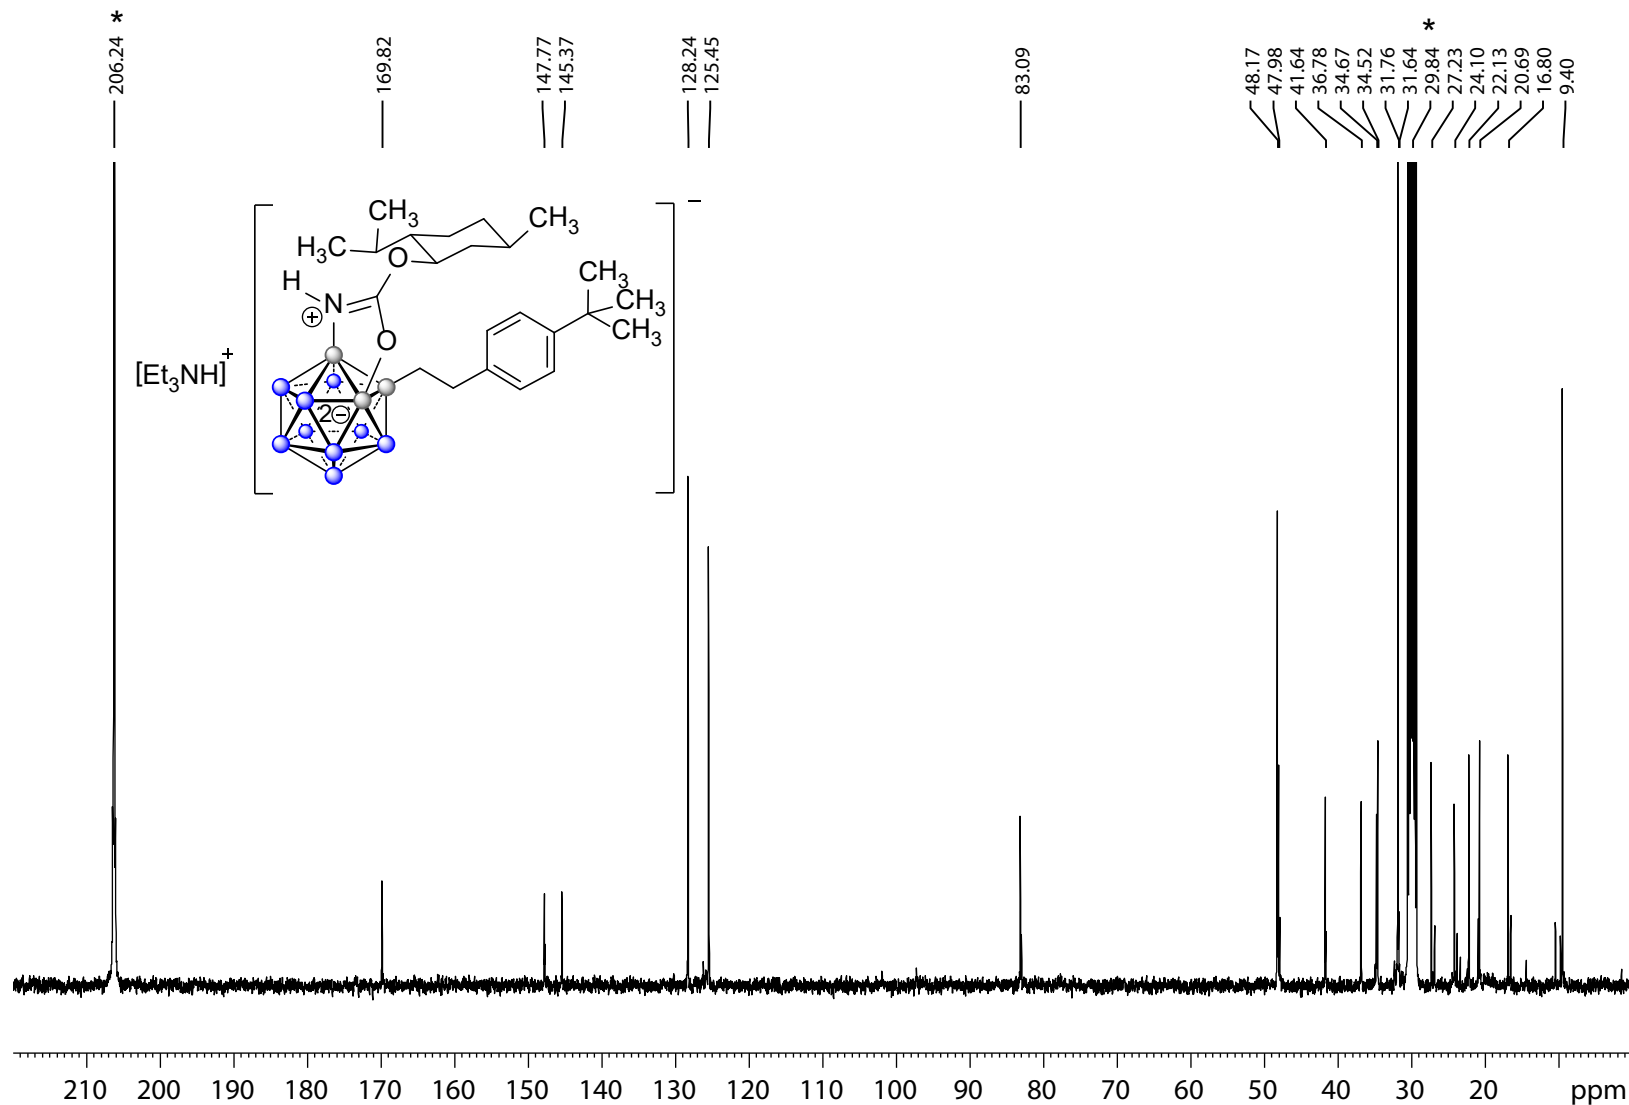

Current Data Parameters  
 NAME 20190323-RV-B12Menth-4BuStyr  
 EXPNO 5  
 PROCNO 1

F2 - Acquisition Parameters  
 Date 20190324  
 Time 8.19  
 INSTRUM spect  
 PROBHD 5 mm PABBO BB/  
 PULPROG zgpg30  
 TD 65536  
 SOLVENT Acetone  
 NS 2048  
 DS 4  
 SWH 29761.904 Hz  
 FIDRES 0.454131 Hz  
 AQ 1.1010048 sec  
 RG 193.34  
 DW 16.800 usec  
 DE 6.50 usec  
 TE 296.8 K  
 D1 1.50000000 sec  
 D11 0.03000000 sec  
 TD0 1

==== CHANNEL f1 =====  
 NUC1 13C  
 P1 10.00 usec  
 PLW1 53.00000000 W  
 SFO1 100.6228293 MHz

==== CHANNEL f2 =====  
 CPDPRG[2] waltz16  
 NUC2 1H  
 PCPD2 80.00 usec  
 PLW2 12.50000000 W  
 PLW12 0.43945000 W  
 PLW13 0.28125000 W  
 SFO2 400.1316005 MHz

F2 - Processing parameters  
 SI 32768  
 SF 100.6126829 MHz  
 WDW EM  
 SSB 0  
 LB 2.00 Hz  
 GB 0  
 PC 1.40

20190323-B12M-4tBuMeStyr 20 mg white solid  $[\text{Et}_3\text{NH}][\text{B}_{12}\text{H}_{10}\text{NHC}(\text{Menthyl})\text{OCH}_2\text{CH}_2\text{C}_6\text{H}_4\text{Bu}]$  dissolved in 0.6 mL acetone- $d_6^*$

$^{13}\text{CDEPT}$  NMR 100 MHz

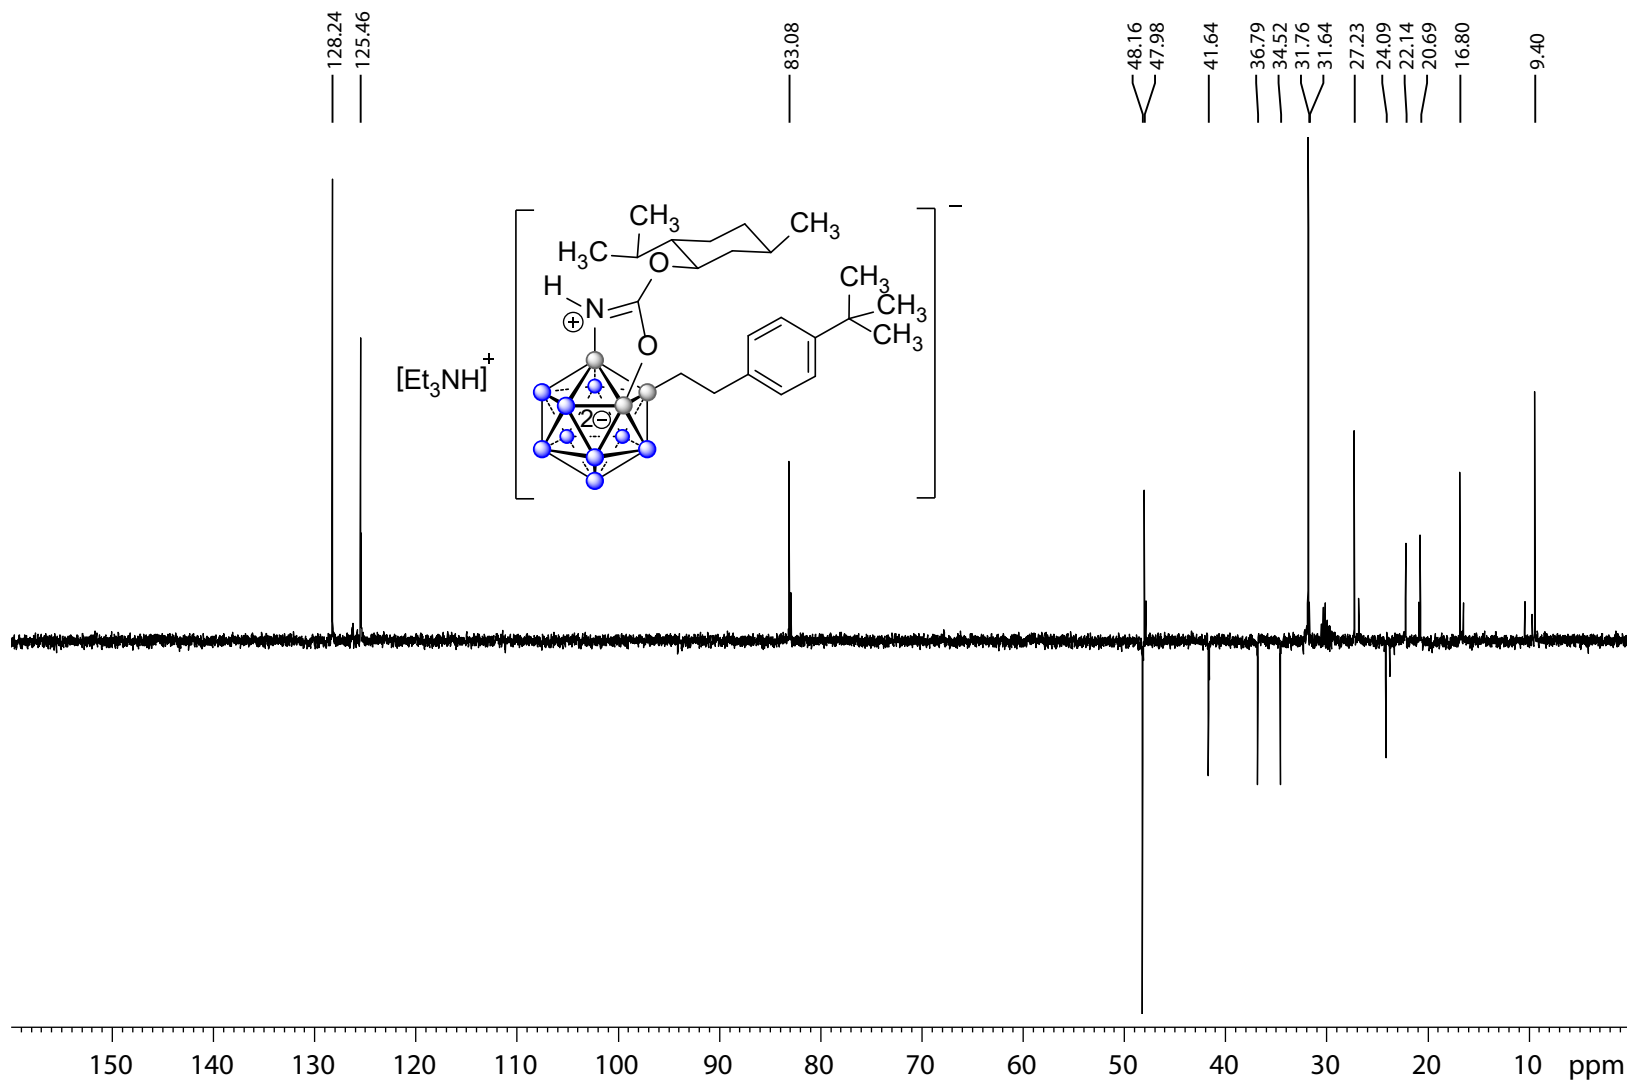

Current Data Parameters  
 NAME 20190323-RV-B12Menth-4BuStyr  
 EXPNO 6  
 PROCNO 1

F2 - Acquisition Parameters  
 Date\_ 20190324  
 Time\_ 8.47  
 INSTRUM spect  
 PROBHD 5 mm PABBO BB/  
 PULPROG dept135  
 TD 65536  
 SOLVENT Acetone  
 NS 512  
 DS 4  
 SWH 29296.875 Hz  
 FIDRES 0.447035 Hz  
 AQ 1.1184810 sec  
 RG 193.34  
 DW 17.067 usec  
 DE 6.50 usec  
 TE 296.3 K  
 CNST2 145.0000000  
 D1 2.00000000 sec  
 D2 0.00344828 sec  
 D12 0.00002000 sec  
 TD0 1

==== CHANNEL f1 =====  
 NUC1 13C  
 P1 10.00 usec  
 P2 20.00 usec  
 PLW1 53.00000000 W  
 SFO1 100.6228293 MHz

==== CHANNEL f2 =====  
 CPDPRG[2] waltz16  
 NUC2 1H  
 P3 15.00 usec  
 P4 30.00 usec  
 PCPD2 80.00 usec  
 PLW2 12.50000000 W  
 PLW12 0.43945000 W  
 SFO2 400.1316005 MHz

F2 - Processing parameters  
 SI 32768  
 SF 100.6126827 MHz  
 WDW EM  
 SSB 0  
 LB 1.00 Hz  
 GB 0  
 PC 4.00

20190323-B12M-4tBuMeStyr 20 mg white solid  $[\text{Et}_3\text{NH}][\text{B}_{12}\text{H}_{10}\text{NHC}(\text{Menthyl})\text{OCH}_2\text{CH}_2\text{C}_6\text{H}_4\text{Bu}]$  dissolved in 0.6 mL acetone- $d_6$ \*

$^1\text{H} - ^1\text{H}$  COSY NMR

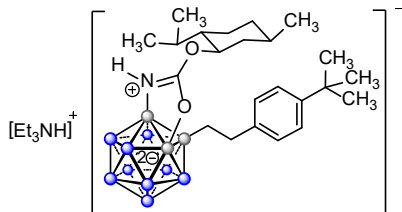

Current Data Parameters  
 NAME 20190323-RV-B12Menth-4BuStyr  
 EXPNO 8  
 PROCNO 1

F2 - Acquisition Parameters  
 Date\_ 20190324  
 Time\_ 9.04  
 INSTRUM spect  
 PROBHD 5 mm PABBO BB/  
 PULPROG cosygpppqf  
 TD 2048  
 SOLVENT Acetone  
 NS 2  
 DS 8  
 SWH 5341.880 Hz  
 FIDRES 2.608340 Hz  
 AQ 0.1916928 sec  
 RG 124.48  
 DW 93.600 usec  
 DE 6.50 usec  
 TE 296.0 K  
 D0 0.0000300 sec  
 D1 2.0000000 sec  
 D11 0.0300000 sec  
 D12 0.0000200 sec  
 D13 0.0000040 sec  
 D16 0.0002000 sec  
 INO 0.00018720 sec

===== CHANNEL f1 =====  
 NUC1 1H  
 P0 15.00 usec  
 P1 15.00 usec  
 P17 2500.00 usec  
 PLW1 12.5000000 W  
 PLW10 4.16050005 W  
 SFO1 400.1324057 MHz

===== GRADIENT CHANNEL =====  
 GPNAM[1] SMSQ10.100  
 GPZ1 10.00 %  
 P16 1000.00 usec

F1 - Acquisition parameters  
 TD 128  
 SFO1 400.1324 MHz  
 FIDRES 83.466881 Hz  
 SW 13.350 ppm  
 FnmODE QF

F2 - Processing parameters  
 SI 1024  
 SF 400.1300068 MHz  
 WDW QSINE  
 SSB 0  
 LB 0 Hz  
 GB 0  
 PC 1.40

F1 - Processing parameters  
 SI 1024  
 MC2 QF  
 SF 400.1300067 MHz  
 WDW QSINE  
 SSB 0  
 LB 0 Hz  
 GB 0

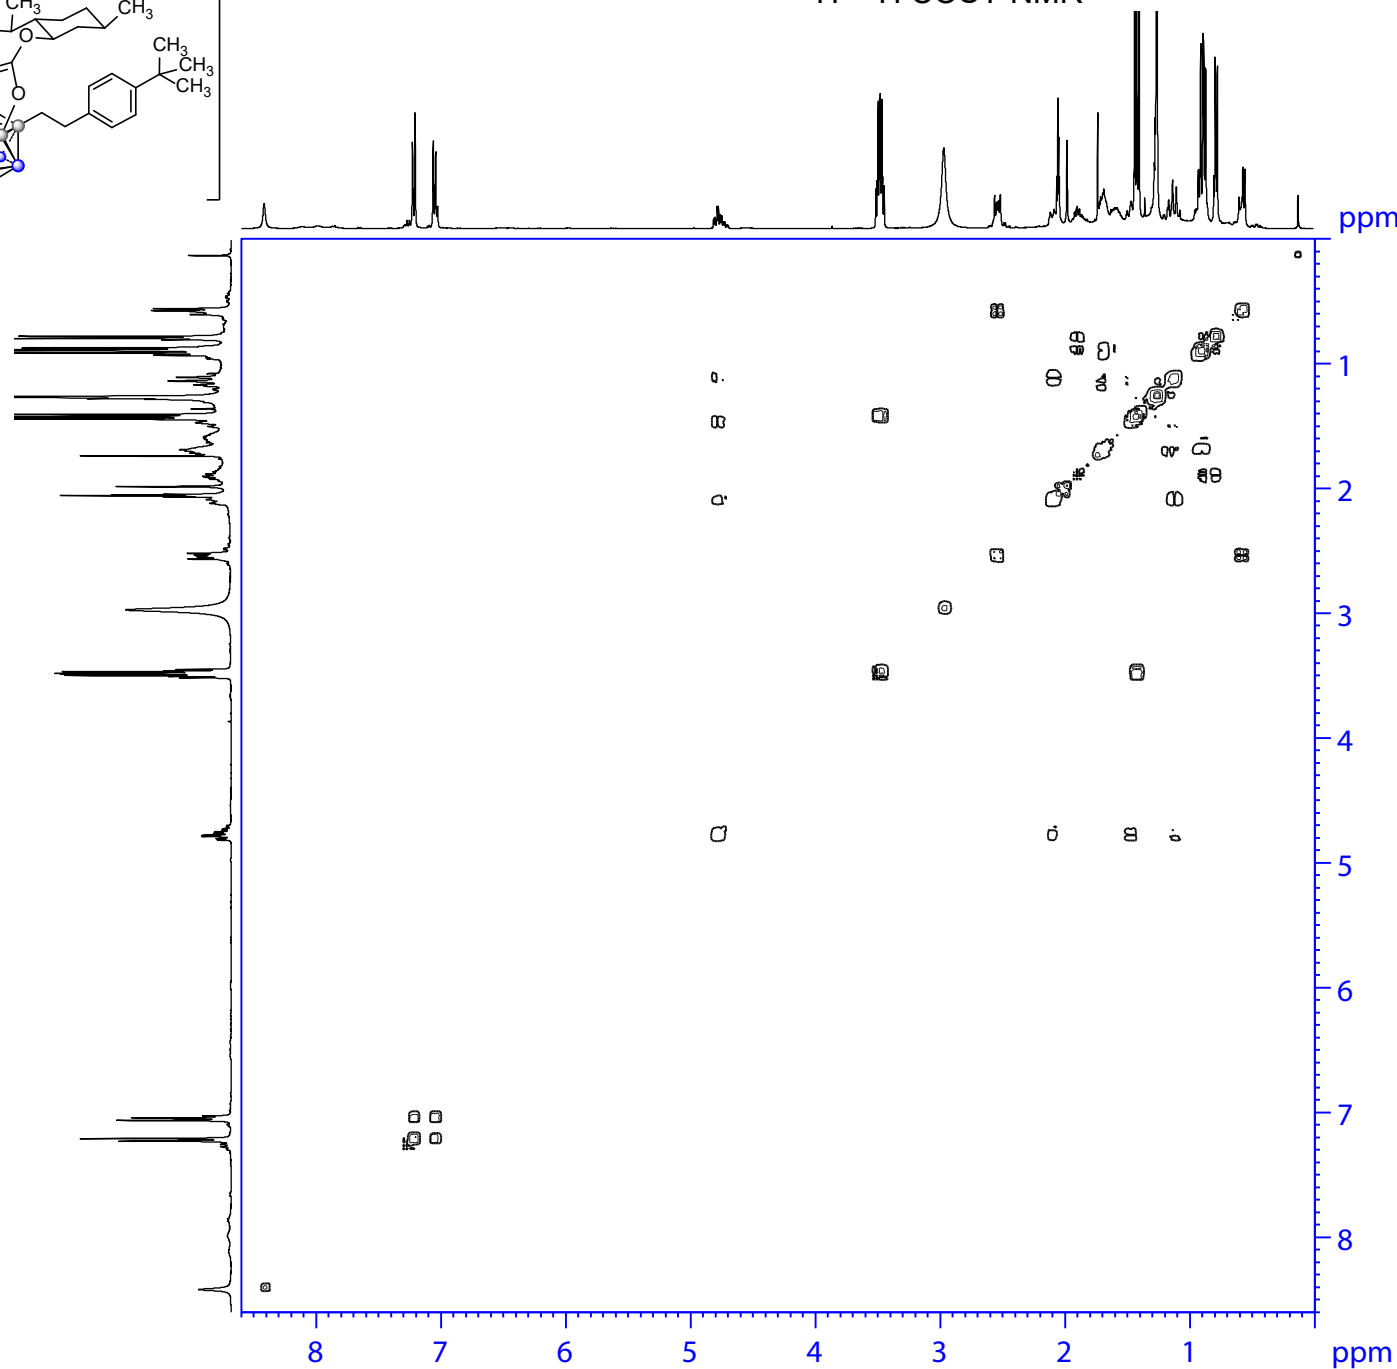

20190323-B12M-4tBuMeStyr 20 mg white solid [Et<sub>3</sub>NH][B<sub>12</sub>H<sub>10</sub>NHC(Menthyl)OCH<sub>2</sub>CH<sub>2</sub>C<sub>6</sub>H<sub>4</sub>Bu] dissolved in 0.6 mL acetone-d<sub>6</sub>\*

<sup>1</sup>H - <sup>13</sup>C HSQC NMR

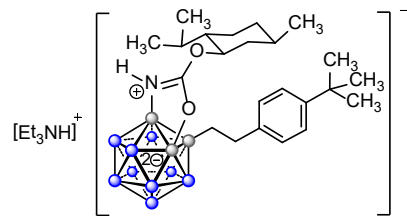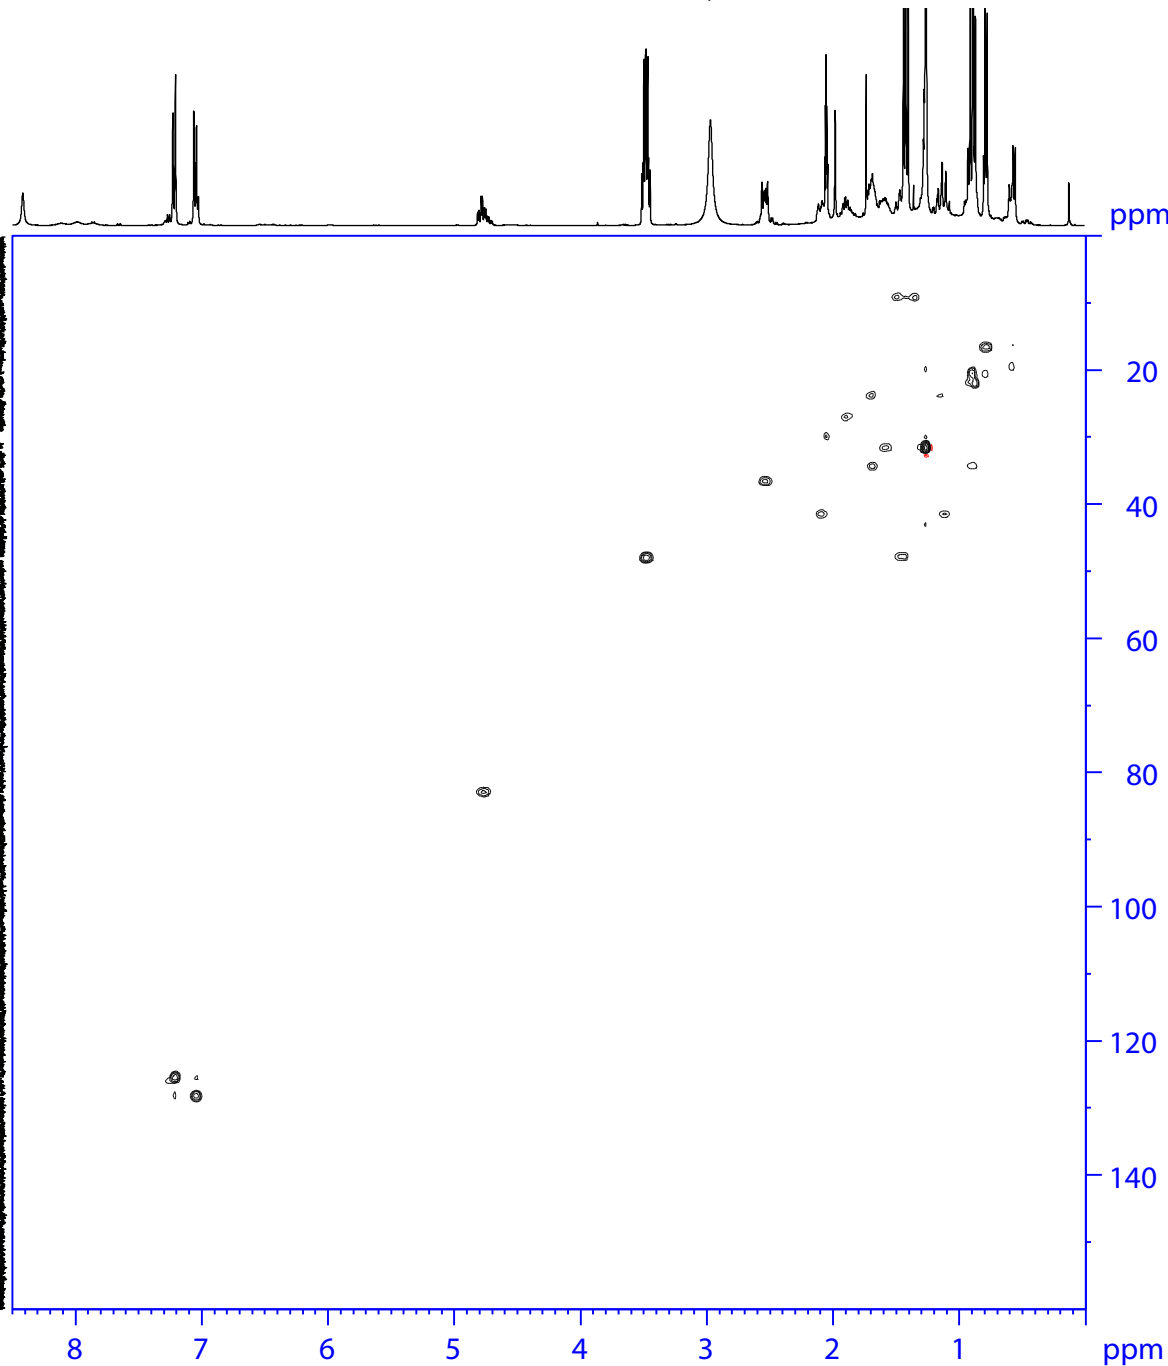

```

Current Data Parameters
NAME      20190323-RV-B12Menth-4BuStyr
EXPNO    7
PROCNO   1

F2 - Acquisition Parameters
Date_    20190324
Time     8.49
INSTRUM  spect
PROBHD   5 mm PABBO BB/
PULPROG  hsqcetgps12
TD       1024
SOLVENT  Acetone
NS       2
DS       16
SWH      6009.615 Hz
FIDRES   5.868765 Hz
AQ       0.0851968 sec
RG       193.34
DW       83.200 usec
DE       6.50 usec
TE       296.1 K
CNST2    145.0000000
D0       0.0000300 sec
D1       1.500000000 sec
D4       0.00172414 sec
D11      0.03000000 sec
D16      0.00020000 sec
D24      0.00086207 sec
IN0      0.00001990 sec
ZGOPTNS

===== CHANNEL f1 =====
NUC1     1H
P1       15.00 usec
P2       30.00 usec
P28      1000.00 usec
PLW1     12.50000000 W
SFO1     400.1328009 MHz

===== CHANNEL f2 =====
CPDPRG2  gaxp
NUC2     13C
P3       10.00 usec
P4       20.00 usec
PCPD2    70.00 usec
PLW2     53.00000000 W
PLW12    1.08159995 W
SFO2     100.6238364 MHz

===== GRADIENT CHANNEL =====
GPNAM[1] SMSQ10.100
GPNAM[2] SMSQ10.100
GPNAM[3] SMSQ10.100
GPNAM[4] SMSQ10.100
GPZ1     80.00 %
GPZ2     20.10 %
GPZ3     11.00 %
GPZ4     -5.00 %
P16      1000.00 usec
P19      600.00 usec

F1 - Acquisition parameters
TD       256
SFO1     100.6238 MHz
FIDRES   196.524048 Hz
SW       249.991 ppm
FhMODE   Echo-Antiecho

F2 - Processing parameters
SI       1024
SF       400.1300092 MHz
WDW      QSINE
SSB      2
LB       0 Hz
GB       0
PC       1.40

F1 - Processing parameters
SI       1024
MC2      echo-antiecho
SF       100.6126749 MHz
WDW      QSINE
SSB      2
LB       0 Hz
GB       0
    
```

20190326-B12M-4OOMeStyr 20 mg white solid  $[\text{Et}_3\text{NH}][\text{B}_{12}\text{H}_{10}\text{NHC}(\text{Menthyl})\text{OCH}_2\text{CH}_2\text{C}_6\text{H}_4\text{OCOMe}]$  dissolved in 0.6 mL acetone- $d_6^*$

400MHz  $^1\text{H}$  NMR,  $\circ$  deuterated solvent residual peak= 2.05 ppm;  $\diamond$  water peak

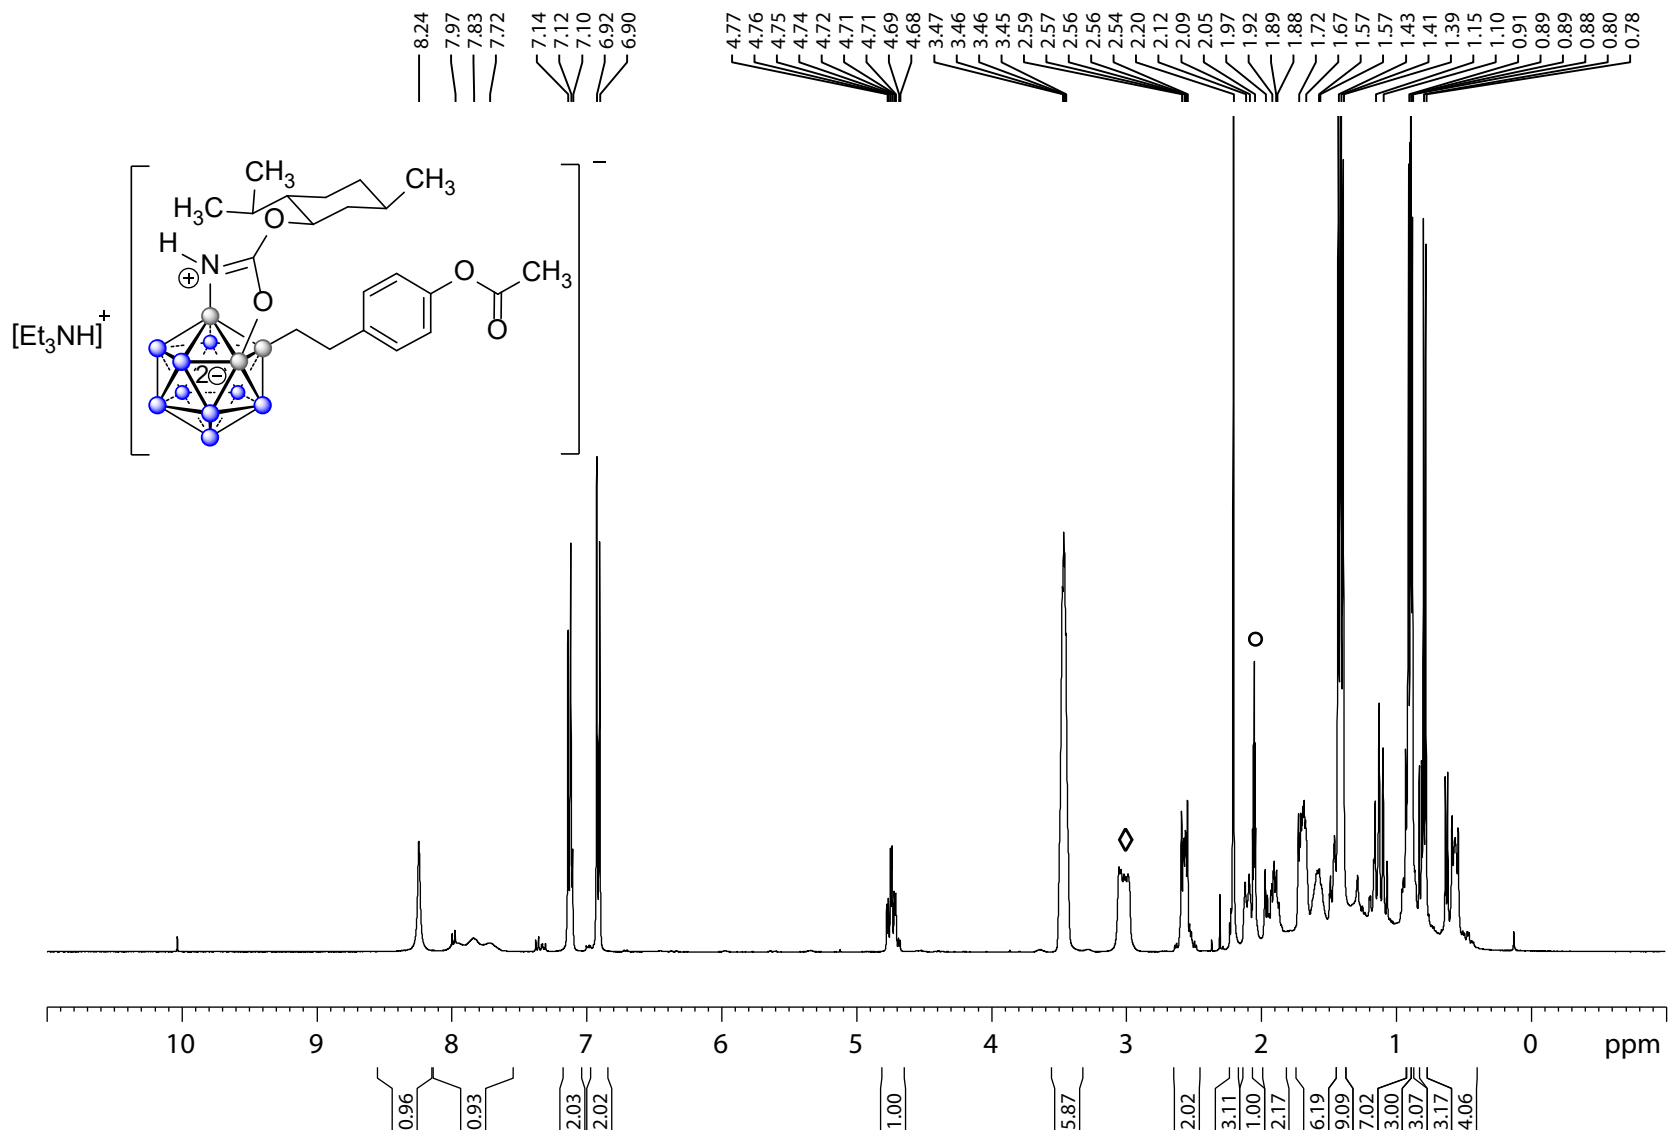

Current Data Parameters  
 NAME 20190326-RV-B12M-4OCOMeSTYR  
 EXPNO 1  
 PROCNO 1

F2 - Acquisition Parameters  
 Date\_ 20190327  
 Time\_ 18.50  
 INSTRUM spect  
 PROBHD 5 mm PABBO BB/  
 PULPROG zg30  
 TD 65536  
 SOLVENT Acetone  
 NS 16  
 DS 2  
 SWH 10000.000 Hz  
 FIDRES 0.152588 Hz  
 AQ 3.2767999 sec  
 RG 39.73  
 DW 50.000 usec  
 DE 6.50 usec  
 TE 297.0 K  
 D1 1.0000000 sec  
 TD0 1

==== CHANNEL f1 =====  
 NUC1 1H  
 P1 15.00 usec  
 PLW1 12.5000000 W  
 SF01 400.1328009 MHz

F2 - Processing parameters  
 SI 65536  
 SF 400.1300070 MHz  
 WDW EM  
 SSB 0  
 LB 0.30 Hz  
 GB 0  
 PC 1.00



20190326-B12M-4OOMeStyr 20 mg white solid [Et<sub>3</sub>NH][B<sub>12</sub>H<sub>10</sub>NHC(Menthyl)OCH<sub>2</sub>CH<sub>2</sub>C<sub>6</sub>H<sub>4</sub>OCOMe] dissolved in 0.6 mL acetone-d<sub>6</sub>\*

400MHz <sup>1</sup>H{B} NMR, o deuterated solvent residual peak= 2.05 ppm; ◇ water peak

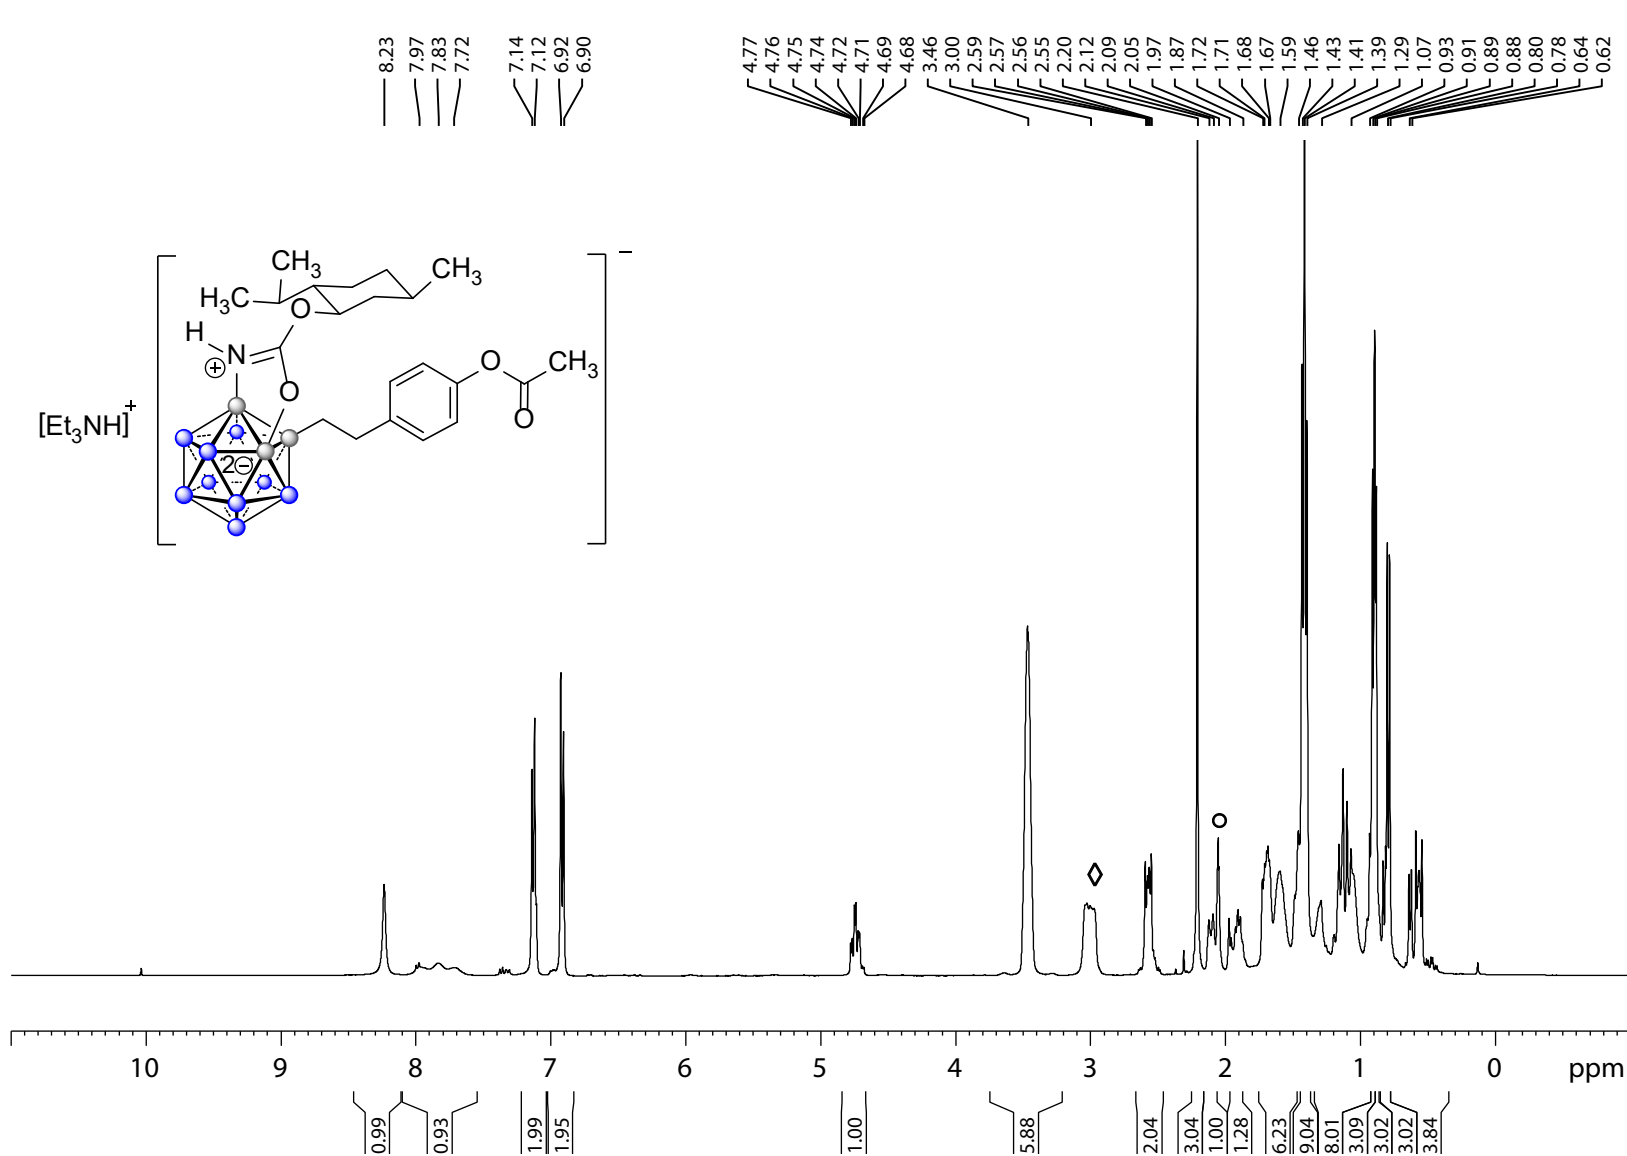

Current Data Parameters  
 NAME 20190326-RV-B12M-4OCOMEStYR  
 EXPNO 2  
 PROCNO 1

F2 - Acquisition Parameters  
 Date\_ 20190327  
 Time\_ 18.51  
 INSTRUM spect  
 PROBHD 5 mm PABBO BB/  
 PULPROG zgig30  
 TD 16384  
 SOLVENT Acetone  
 NS 16  
 DS 4  
 SWH 8012.820 Hz  
 FIDRES 0.489064 Hz  
 AQ 1.0223616 sec  
 RG 39.73  
 DW 62.400 usec  
 DE 6.50 usec  
 TE 297.2 K  
 D1 1.00000000 sec  
 D11 0.03000000 sec  
 TD0 1

===== CHANNEL f1 =====  
 NUC1 1H  
 P1 15.00 usec  
 PLW1 12.5000000 W  
 SFO1 400.1320007 MHz

===== CHANNEL f2 =====  
 CPDPRG[2] garp4  
 NUC2 11B  
 PCPD2 90.00 usec  
 PLW2 52.96599960 W  
 PLW12 0.64477998 W  
 SFO2 128.3776050 MHz

F2 - Processing parameters  
 SI 32768  
 SF 400.1300071 MHz  
 WDW EM  
 SSB 0  
 LB 1.00 Hz  
 GB 0  
 PC 1.40

20190326-B12M-4OOMeStyr 20 mg white solid [Et<sub>3</sub>NH][B<sub>12</sub>H<sub>10</sub>NHC(Menthy)OCH<sub>2</sub>CH<sub>2</sub>C<sub>6</sub>H<sub>4</sub>OCOME] dissolved in 0.6 mL acetone-d<sub>6</sub>\*

<sup>11</sup>B NMR 128 MHz

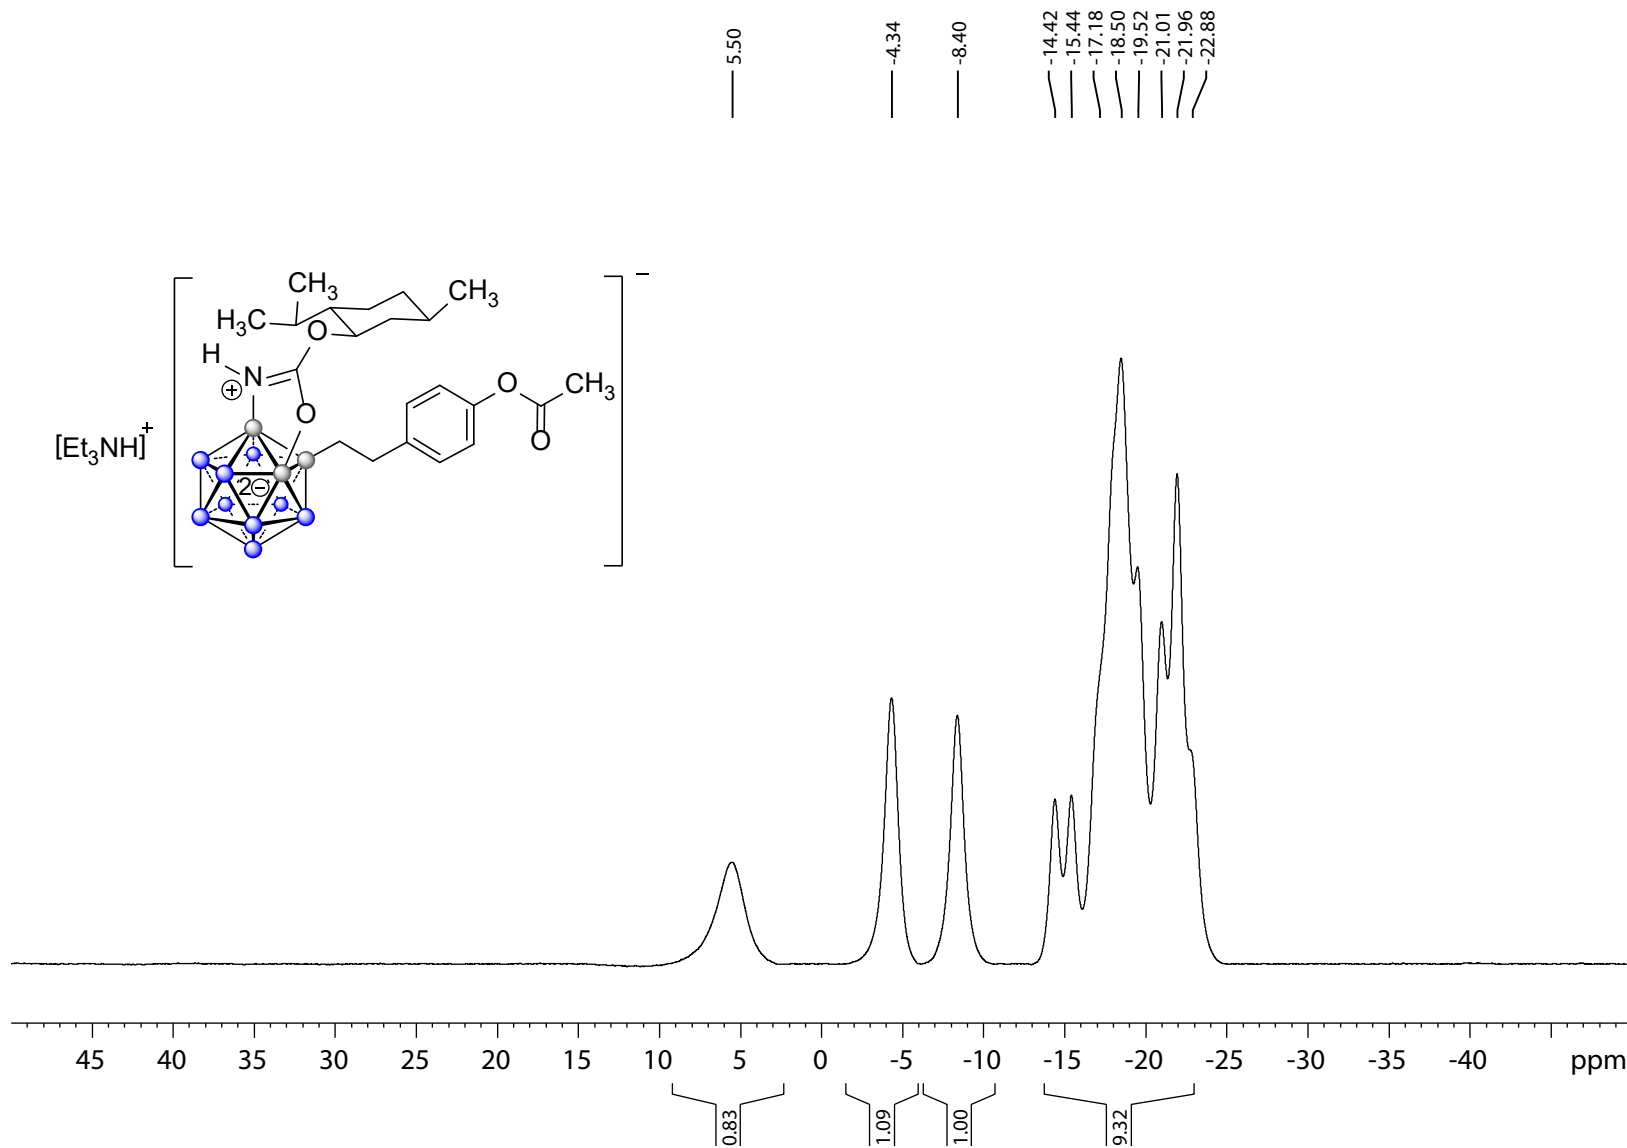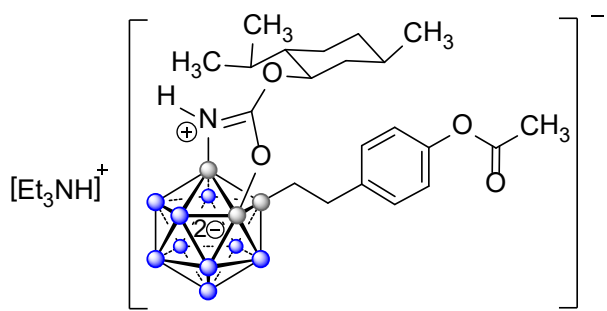

```

Current Data Parameters
NAME      20190326-RV-B12M-4OCOMEStYR
EXPNO    3
PROCNO   1

F2 - Acquisition Parameters
Date_    20190327
Time     18.57
INSTRUM  spect
PROBHD   5 mm PABBO BB/
PULPROG  zg
TD       65536
SOLVENT  Acetone
NS       128
DS       4
SWH      25510.203 Hz
FIDRES   0.389255 Hz
AQ       1.2845056 sec
RG       193.34
DW       19.600 usec
DE       6.50 usec
TE       296.9 K
D1       1.00000000 sec
TD0      1

===== CHANNEL f1 =====
NUC1     11B
P1       9.93 usec
PLW1     52.96599960 W
SF01     128.3776052 MHz

F2 - Processing parameters
SI       32768
SF       128.3776050 MHz
WDW      EM
SSB      0
LB       10.00 Hz
GB       0
PC       1.40
    
```

20190326-B12M-4OOMeStyr 20 mg white solid  $[\text{Et}_3\text{NH}][\text{B}_{12}\text{H}_{10}\text{NHC}(\text{Menthyl})\text{OCH}_2\text{CH}_2\text{C}_6\text{H}_4\text{OCOMe}]$  dissolved in 0.6 mL acetone- $d_6^*$

$^{11}\text{B}\{\text{H}\}$  NMR 128 MHz

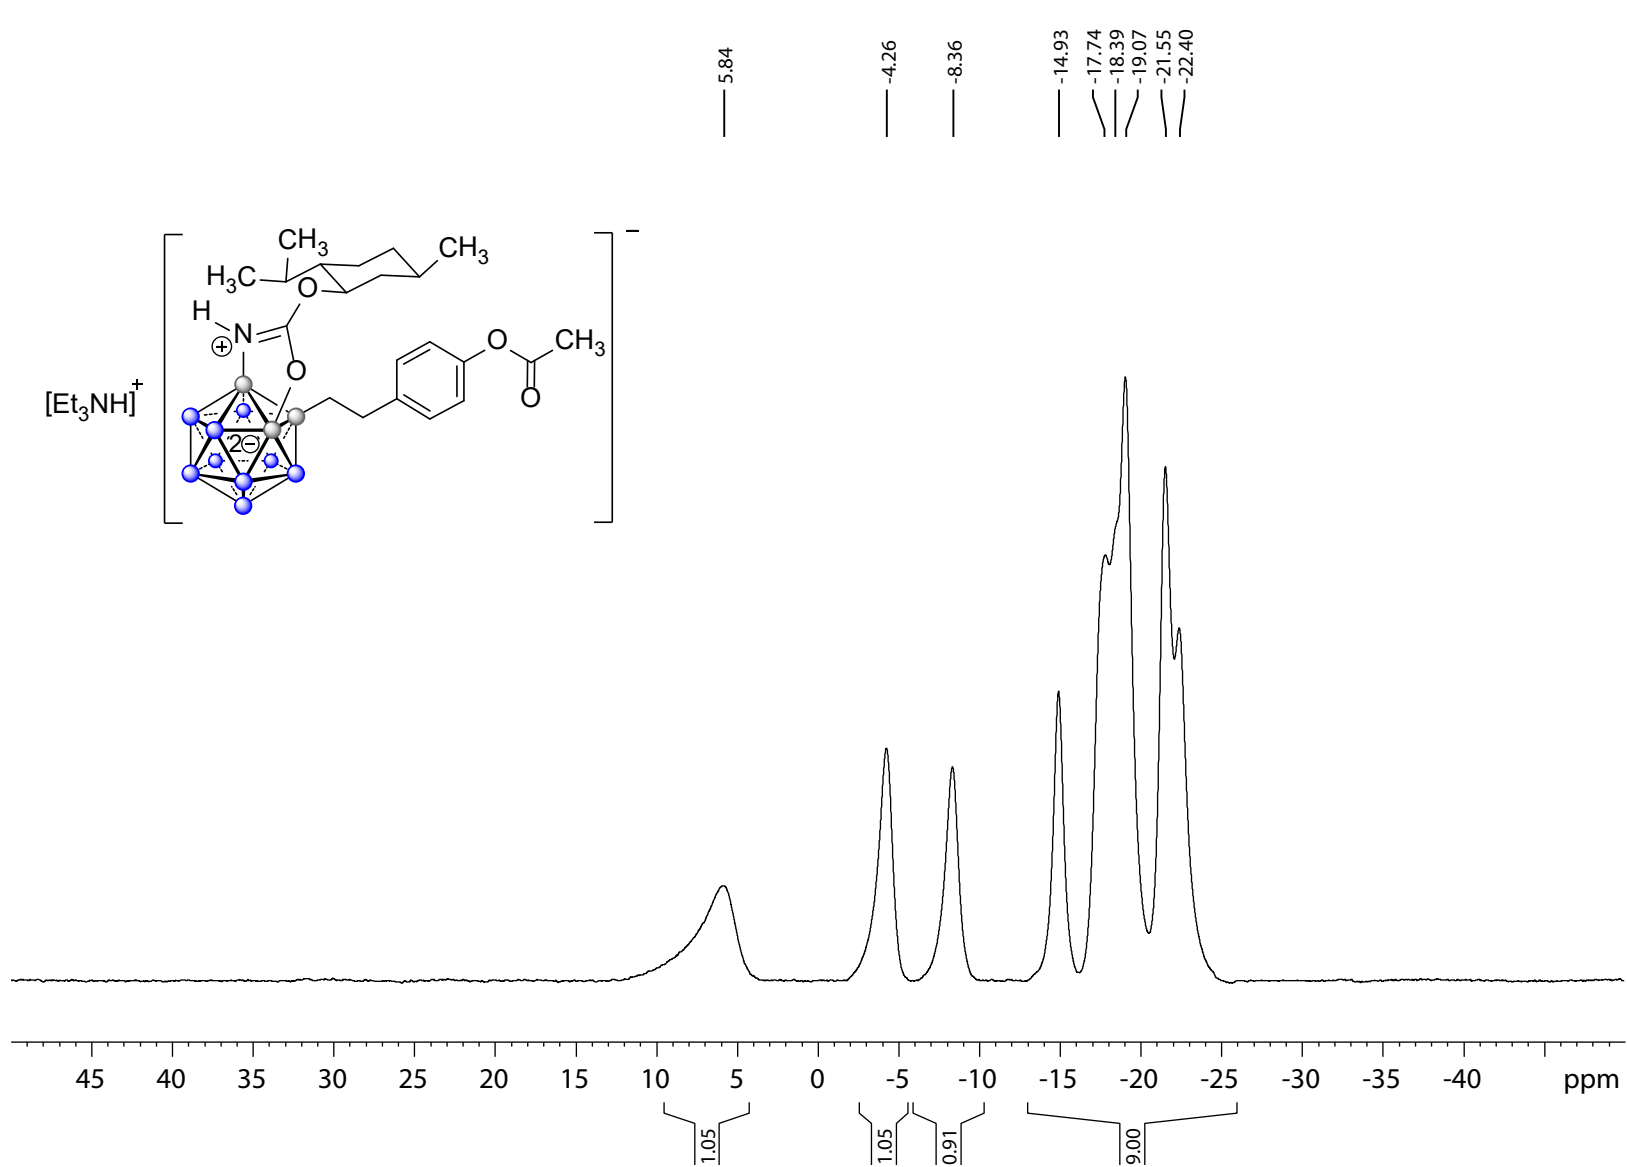

Current Data Parameters  
 NAME 20190326-RV-B12M-4OCOMESTYR  
 EXPNO 4  
 PROCNO 1

F2 - Acquisition Parameters  
 Date\_ 20190327  
 Time 19.03  
 INSTRUM spect  
 PROBHD 5 mm PABBO BB/  
 PULPROG zgpg30  
 TD 65536  
 SOLVENT Acetone  
 NS 128  
 DS 4  
 SWH 25510.203 Hz  
 FIDRES 0.389255 Hz  
 AQ 1.2845056 sec  
 RG 193.34  
 DW 19.600 usec  
 DE 6.50 usec  
 TE 297.7 K  
 D1 1.00000000 sec  
 D11 0.03000000 sec  
 TD0 1

==== CHANNEL f1 =====  
 NUC1 11B  
 P1 9.93 usec  
 PLW1 52.96599960 W  
 SFO1 128.3776050 MHz

==== CHANNEL f2 =====  
 CPDPRG[2] waltz16  
 NUC2 1H  
 PCPD2 80.00 usec  
 PLW2 12.50000000 W  
 PLW12 0.43945000 W  
 PLW13 0.28125000 W  
 SFO2 400.1320007 MHz

F2 - Processing parameters  
 SI 32768  
 SF 128.3776050 MHz  
 WDW EM  
 SSB 0  
 LB 10.00 Hz  
 GB 0  
 PC 1.40

20190326-B12M-4OOMeStyr 20 mg white solid  $[\text{Et}_3\text{NH}][\text{B}_{12}\text{H}_{10}\text{NHC}(\text{Menthyl})\text{OCH}_2\text{CH}_2\text{C}_6\text{H}_4\text{OCOMe}]$  dissolved in 0.6 mL acetone- $d_6^*$

$^{13}\text{C}\{^1\text{H}\}$  NMR 100 MHz

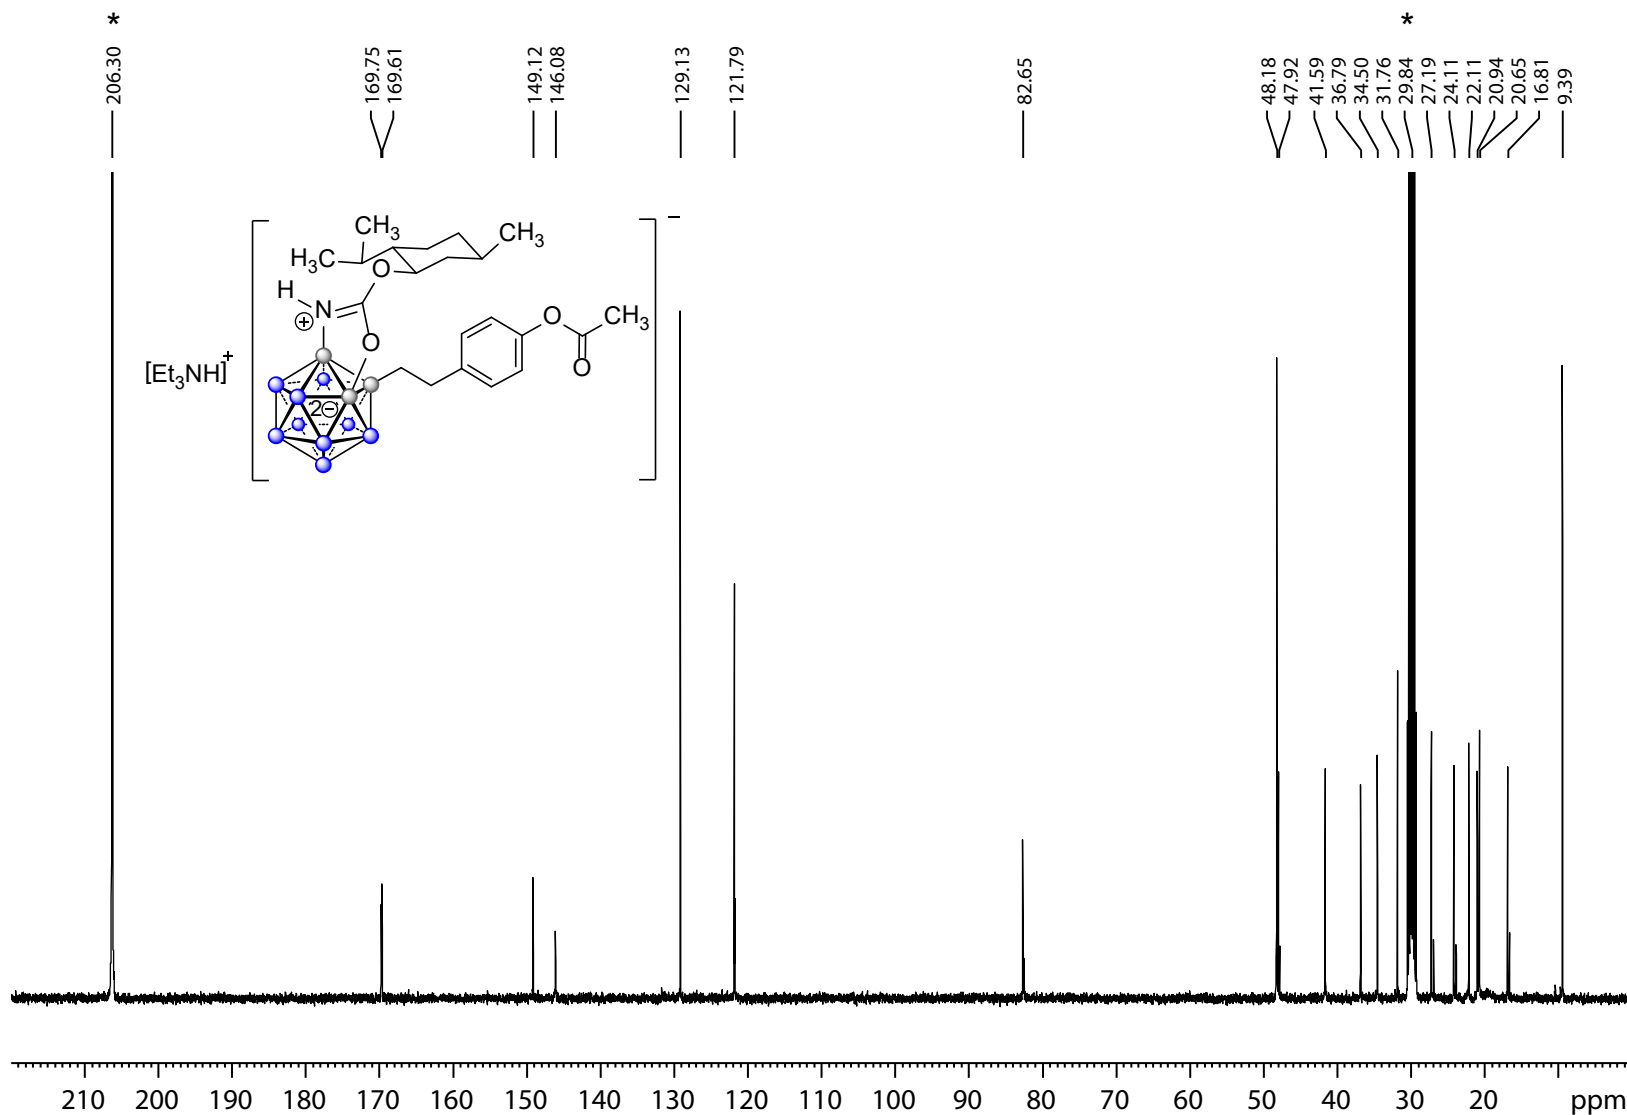

Current Data Parameters  
 NAME 20190326-RV-B12M-4OCOMeSTYR  
 EXPNO 5  
 PROCNO 1

F2 - Acquisition Parameters  
 Date\_ 20190327  
 Time\_ 20.36  
 INSTRUM spect  
 PROBHD 5 mm PABBO BB/  
 PULPROG zgpg30  
 TD 65536  
 SOLVENT Acetone  
 NS 2048  
 DS 4  
 SWH 29761.904 Hz  
 FIDRES 0.454131 Hz  
 AQ 1.1010048 sec  
 RG 193.34  
 DW 16.800 usec  
 DE 6.50 usec  
 TE 297.8 K  
 D1 1.50000000 sec  
 D11 0.03000000 sec  
 TD0 1

===== CHANNEL f1 =====  
 NUC1  $^{13}\text{C}$   
 P1 10.00 usec  
 PLW1 53.00000000 W  
 SFO1 100.6228293 MHz

===== CHANNEL f2 =====  
 CPDPRG[2] waltz16  
 NUC2  $^1\text{H}$   
 PCPD2 80.00 usec  
 PLW2 12.50000000 W  
 PLW12 0.43945000 W  
 PLW13 0.28125000 W  
 SFO2 400.1316005 MHz

F2 - Processing parameters  
 SI 32768  
 SF 100.6126875 MHz  
 WDW EM  
 SSB 0  
 LB 1.00 Hz  
 GB 0  
 PC 1.40

20190326-B12M-4OOMeStyr 20 mg white solid  $[\text{Et}_3\text{NH}][\text{B}_{12}\text{H}_{10}\text{NHC}(\text{Menthyl})\text{OCH}_2\text{CH}_2\text{C}_6\text{H}_4\text{OCOMe}]$  dissolved in 0.6 mL acetone- $d_6^*$

$^{13}\text{CDEPT}$  NMR 100 MHz

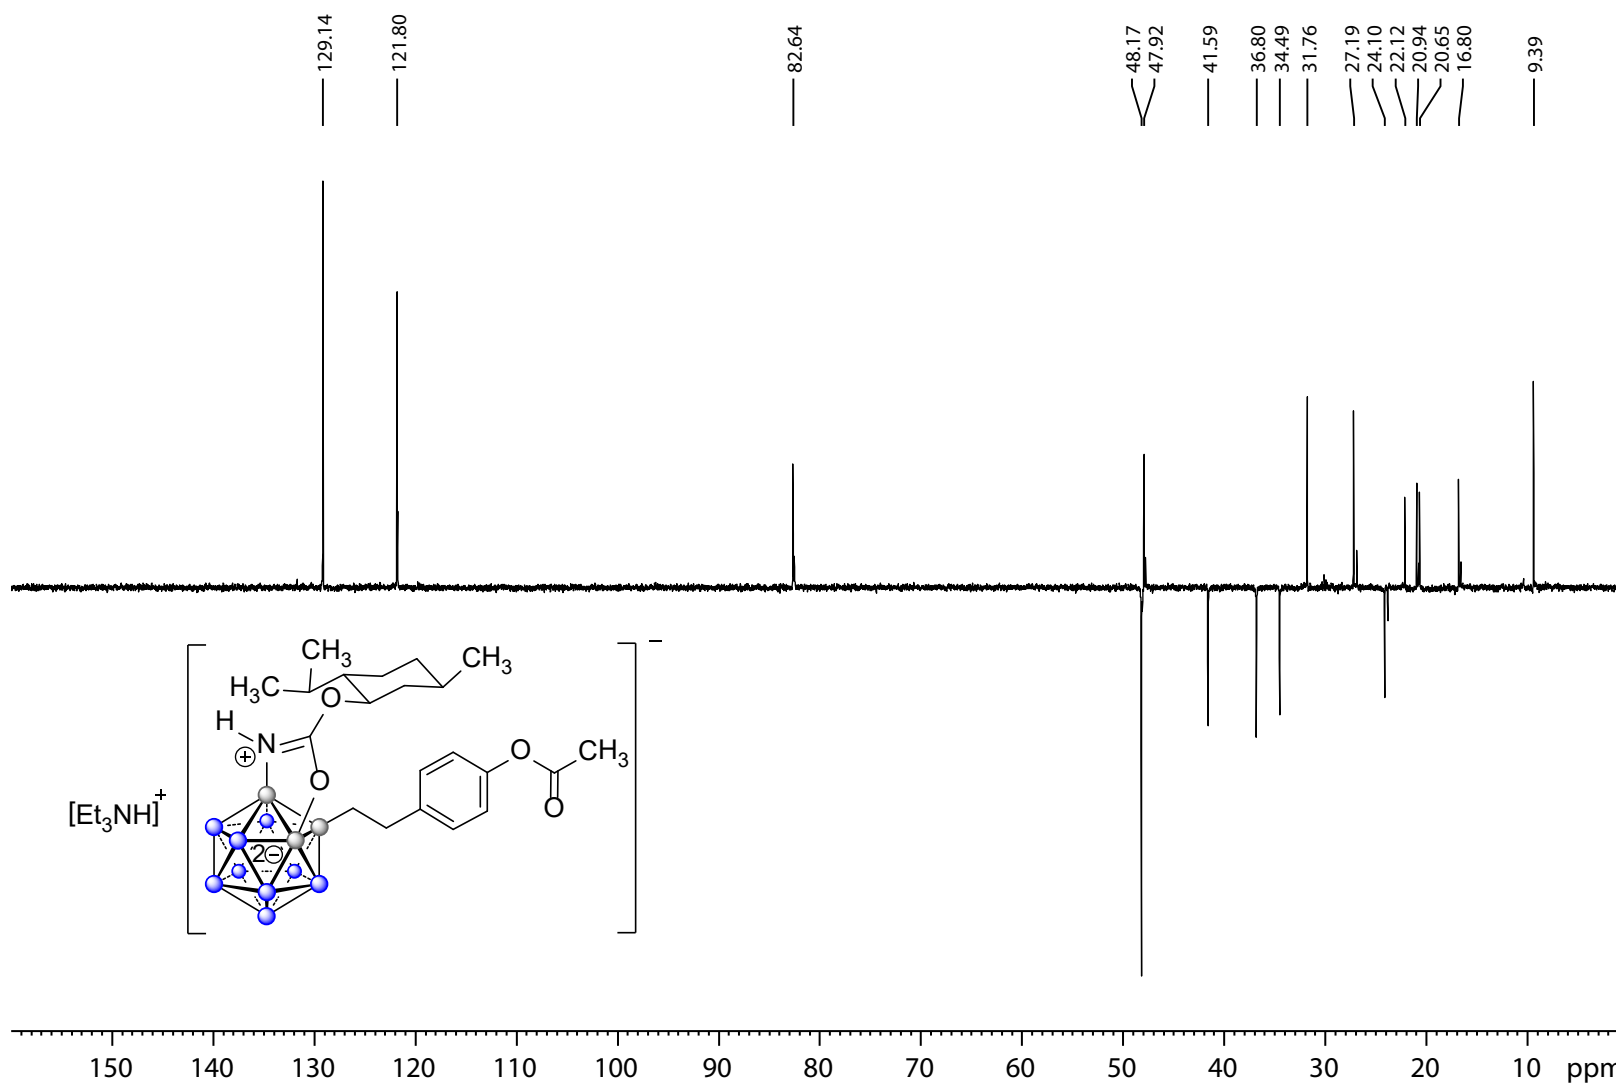

Current Data Parameters  
 NAME 20190326-B12M-4OCOMeSTYR  
 EXPNO 6  
 PROCNO 1

F2 - Acquisition Parameters  
 Date\_ 20190327  
 Time\_ 21.04  
 INSTRUM spect  
 PROBHD 5 mm PABBO BB/  
 PULPROG dept135  
 TD 65536  
 SOLVENT Acetone  
 NS 512  
 DS 4  
 SWH 29296.875 Hz  
 FIDRES 0.447035 Hz  
 AQ 1.1184810 sec  
 RG 193.34  
 DW 17.067 usec  
 DE 6.50 usec  
 TE 297.3 K  
 CNST2 145.0000000  
 D1 2.00000000 sec  
 D2 0.00344828 sec  
 D12 0.00002000 sec  
 TD0 1

===== CHANNEL f1 =====  
 NUC1 13C  
 P1 10.00 usec  
 P2 20.00 usec  
 PLW1 53.00000000 W  
 SFO1 100.6228293 MHz

===== CHANNEL f2 =====  
 CPDPRG[2] waltz16  
 NUC2 1H  
 P3 15.00 usec  
 P4 30.00 usec  
 PCPD2 80.00 usec  
 PLW2 12.50000000 W  
 PLW12 0.43945000 W  
 SFO2 400.1316005 MHz

F2 - Processing parameters  
 SI 32768  
 SF 100.6126873 MHz  
 WDW EM  
 SSB 0  
 LB 1.00 Hz  
 GB 0  
 PC 4.00



$^1\text{H} - ^{13}\text{C}$  HSQC NMR

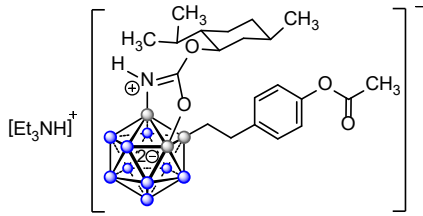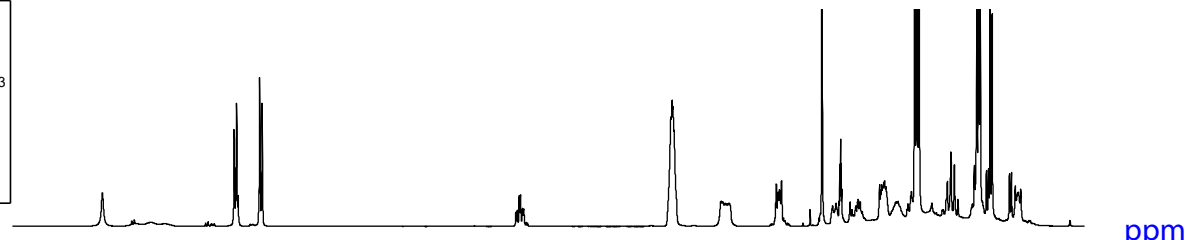

```

Current Data Parameters
NAME      20190326-RV-B12-MENTH-4OCOMEStYR
EXPNO     8
PROCNO    1

F2 - Acquisition Parameters
Date_     20190327
Time      21.16
INSTRUM   spect
PROBHD    5 mm PABBO BB/
PULPROG   hsqcetgps12
TD        1024
SOLVENT   Acetone
NS        2
DS        16
SWH       6009.615 Hz
FIDRES    5.868765 Hz
AQ        0.0851968 sec
RG        193.34
DW        83.200 usec
DE        6.50 usec
TE        297.0 K
CNST2     145.0000000
D0        0.00000300 sec
D1        1.50000000 sec
D4        0.00172414 sec
D11       0.03000000 sec
D16       0.00020000 sec
D24       0.00086207 sec
IN0       0.00001990 sec
ZGPTNS

===== CHANNEL f1 =====
NUC1      1H
P1        15.00 usec
P2        30.00 usec
P28       1000.00 usec
PLW1     12.50000000 W
SFO1     400.1328009 MHz

===== CHANNEL f2 =====
CPDPRG[2]  garp
NUC2      13C
P3        10.00 usec
P4        20.00 usec
PCPD2     70.00 usec
PLW2     53.00000000 W
PLW12    1.08159995 W
SFO2     100.6238364 MHz

===== GRADIENT CHANNEL =====
GPNAM[1]   SMSQ10.100
GPNAM[2]   SMSQ10.100
GPNAM[3]   SMSQ10.100
GPNAM[4]   SMSQ10.100
GPZ1      80.00 %
GPZ2      20.10 %
GPZ3      11.00 %
GPZ4      -5.00 %
P16       1000.00 usec
P19       600.00 usec

F1 - Acquisition parameters
TD        256
SFO1     100.6238 MHz
FIDRES    196.524048 Hz
SW        249.991 ppm
FnMODE    Echo-Antiecho

F2 - Processing parameters
SI        1024
SF        400.1300000 MHz
WDW       QSINE
SSB       2
LB        0 Hz
GB        0
PC        1.40

F1 - Processing parameters
SI        1024
MC2       echo-antiecho
SF        100.6127690 MHz
WDW       QSINE
SSB       2
LB        0 Hz
GB        0
    
```

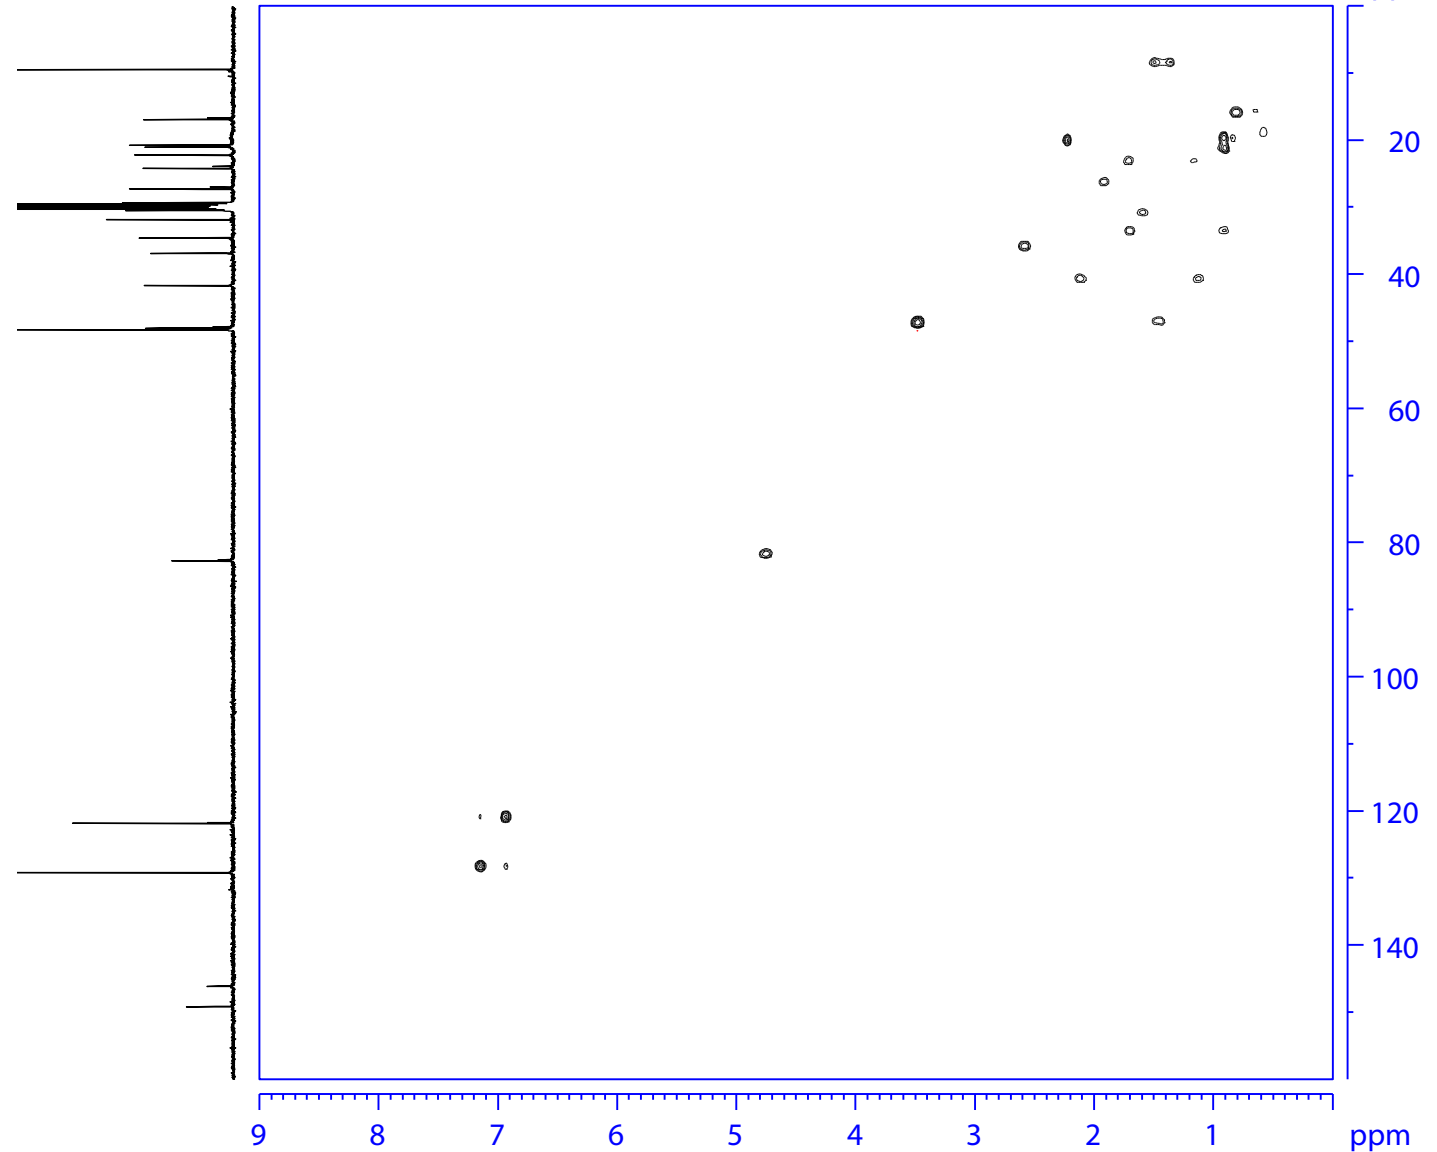

20190401-B12M-4ClStyr 20 mg white solid  $[\text{Et}_3\text{NH}][\text{B}_{12}\text{H}_{10}\text{NHC}(\text{Menthyl})\text{OCH}_2\text{CH}_2\text{C}_6\text{H}_4\text{Cl}]$  dissolved in 0.6 mL acetone- $d_6^*$

400MHz  $^1\text{H}$  NMR,  $\circ$  deuterated solvent residual peak = 2.05 ppm;  $\diamond$  water peak

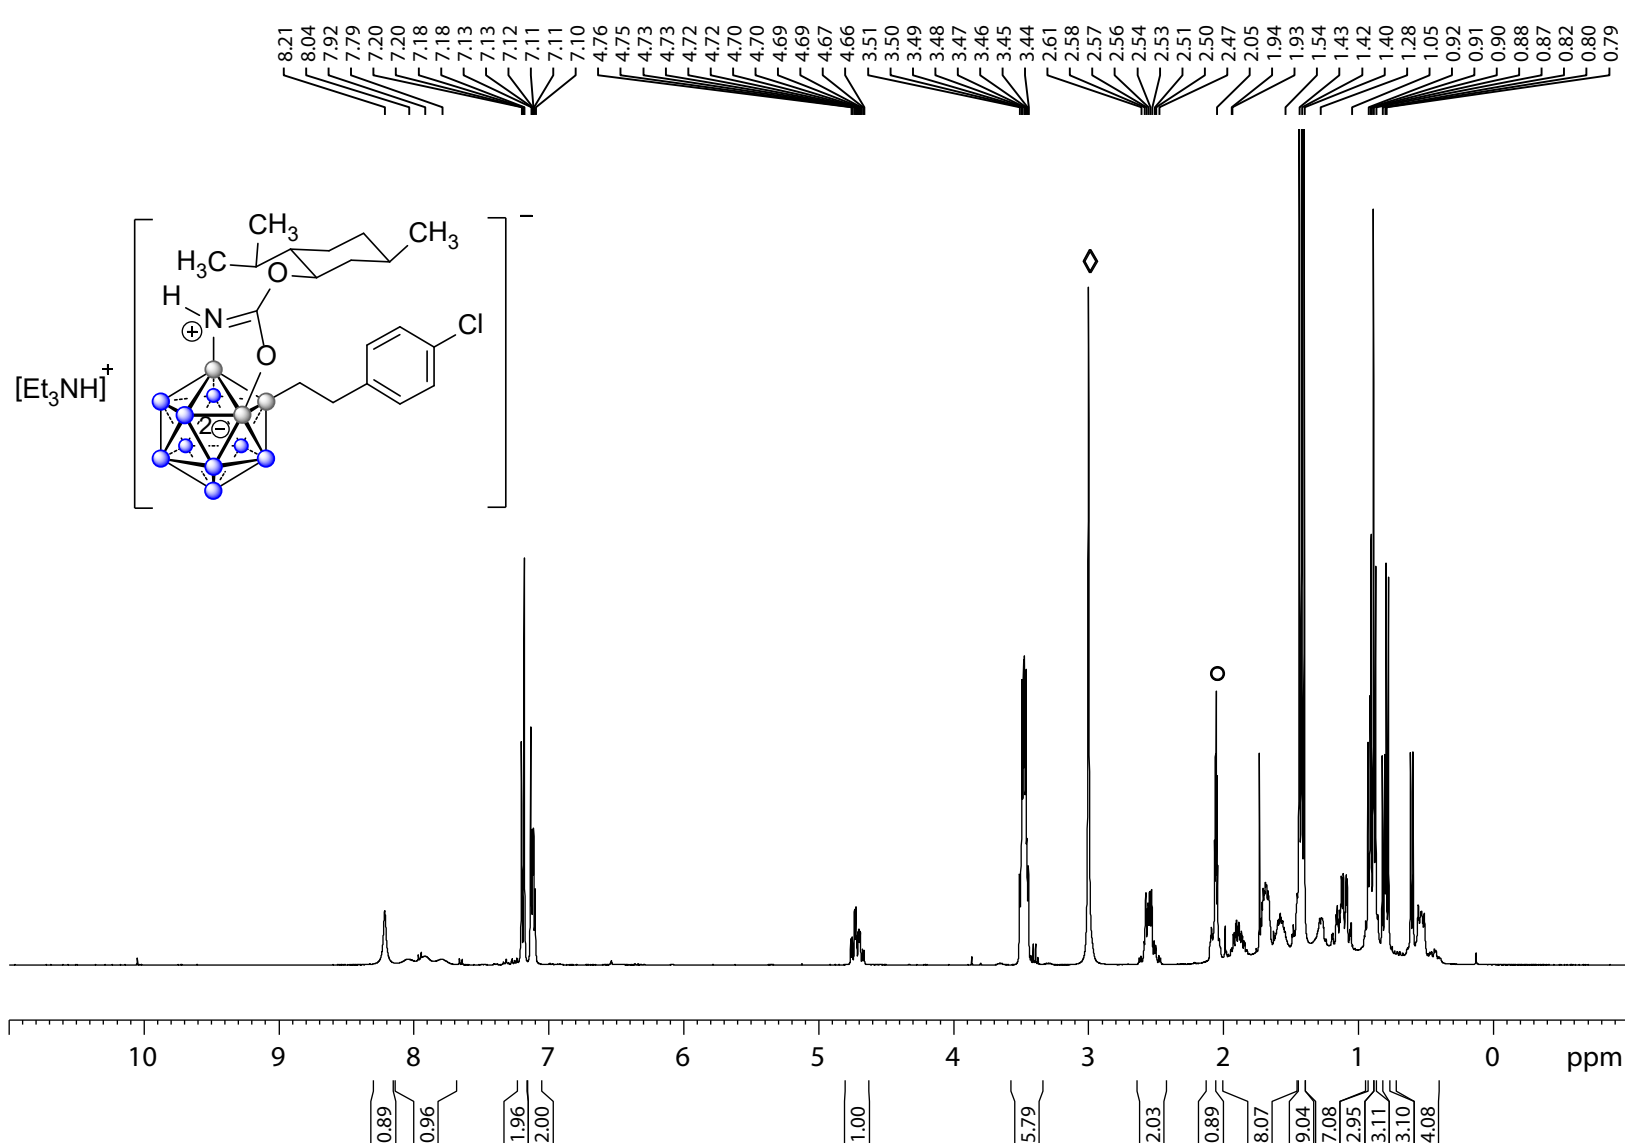

Current Data Parameters  
 NAME 20190401-B12M-4Cl-STYR  
 EXPNO 1  
 PROCNO 1

F2 - Acquisition Parameters  
 Date 20190402  
 Time 21.01  
 INSTRUM spect  
 PROBHD 5 mm PABBO BB/  
 PULPROG zg30  
 TD 65536  
 SOLVENT Acetone  
 NS 16  
 DS 2  
 SWH 10000.000 Hz  
 FIDRES 0.152588 Hz  
 AQ 3.2767999 sec  
 RG 64.43  
 DW 50.000 usec  
 DE 6.50 usec  
 TE 296.2 K  
 D1 1.00000000 sec  
 TD0 1

===== CHANNEL f1 =====  
 NUC1  $^1\text{H}$   
 P1 15.00 usec  
 PLW1 12.50000000 W  
 SFO1 400.1328009 MHz

F2 - Processing parameters  
 SI 65536  
 SF 400.1300070 MHz  
 WDW EM  
 SSB 0  
 LB 0.30 Hz  
 GB 0  
 PC 1.00



20190401-B12M-4ClStyr 20 mg white solid  $[\text{Et}_3\text{NH}][\text{B}_{12}\text{H}_{10}\text{NHC}(\text{Menthyl})\text{OCH}_2\text{CH}_2\text{C}_6\text{H}_4\text{Cl}]$  dissolved in 0.6 mL acetone- $d_6^*$

400MHz  $^1\text{H}\{\text{B}\}$  NMR, o deuterated solvent residual peak= 2.05 ppm;  $\diamond$  water peak

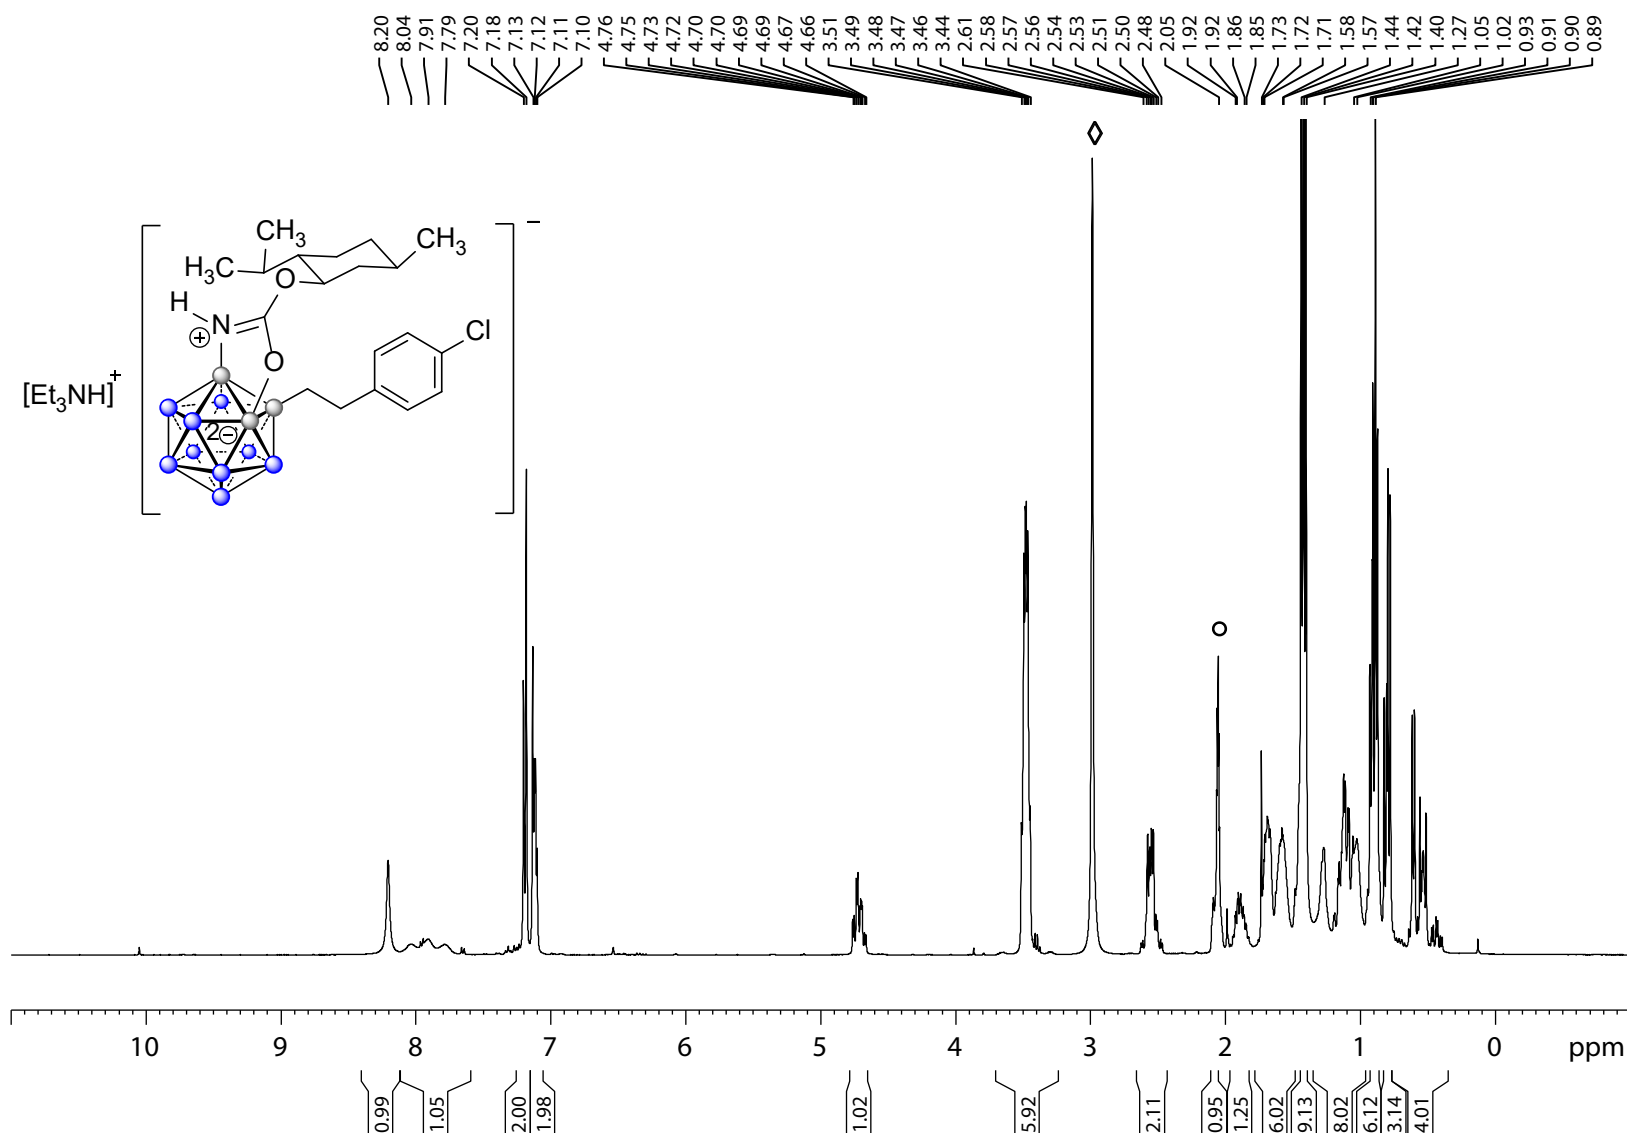

Current Data Parameters  
 NAME 20190401-B12M-4Cl-STYR  
 EXPNO 2  
 PROCNO 1

F2 - Acquisition Parameters  
 Date\_ 20190402  
 Time 21.03  
 INSTRUM spect  
 PROBHD 5 mm PABBO BB/  
 PULPROG zgig30  
 TD 16384  
 SOLVENT Acetone  
 NS 16  
 DS 4  
 SWH 8012.820 Hz  
 FIDRES 0.489064 Hz  
 AQ 1.0223616 sec  
 RG 71.39  
 DW 62.400 usec  
 DE 6.50 usec  
 TE 296.4 K  
 D1 1.00000000 sec  
 D11 0.03000000 sec  
 TD0 1

===== CHANNEL f1 =====  
 NUC1  $^1\text{H}$   
 P1 15.00 usec  
 PLW1 12.5000000 W  
 SFO1 400.1320007 MHz

===== CHANNEL f2 =====  
 CPDPRG2 garp4  
 NUC2  $^{11}\text{B}$   
 PCPD2 90.00 usec  
 PLW2 52.96599960 W  
 PLW12 0.64477998 W  
 SFO2 128.3776050 MHz

F2 - Processing parameters  
 SI 32768  
 SF 400.1300071 MHz  
 WDW EM  
 SSB 0  
 LB 1.00 Hz  
 GB 0  
 PC 1.40

20190401-B12M-4ClStyr 20 mg white solid  $[\text{Et}_3\text{NH}][\text{B}_{12}\text{H}_{10}\text{NHC}(\text{Menthyl})\text{OCH}_2\text{CH}_2\text{C}_6\text{H}_4\text{Cl}]$  dissolved in 0.6 mL acetone- $d_6^*$

$^{11}\text{B}$  NMR 128MHz

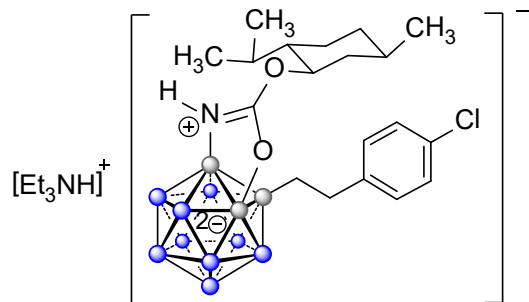

5.44  
-4.54  
-8.72  
-14.56  
-15.58  
-17.04  
-18.36  
-19.32  
-20.62  
-21.58  
-22.41

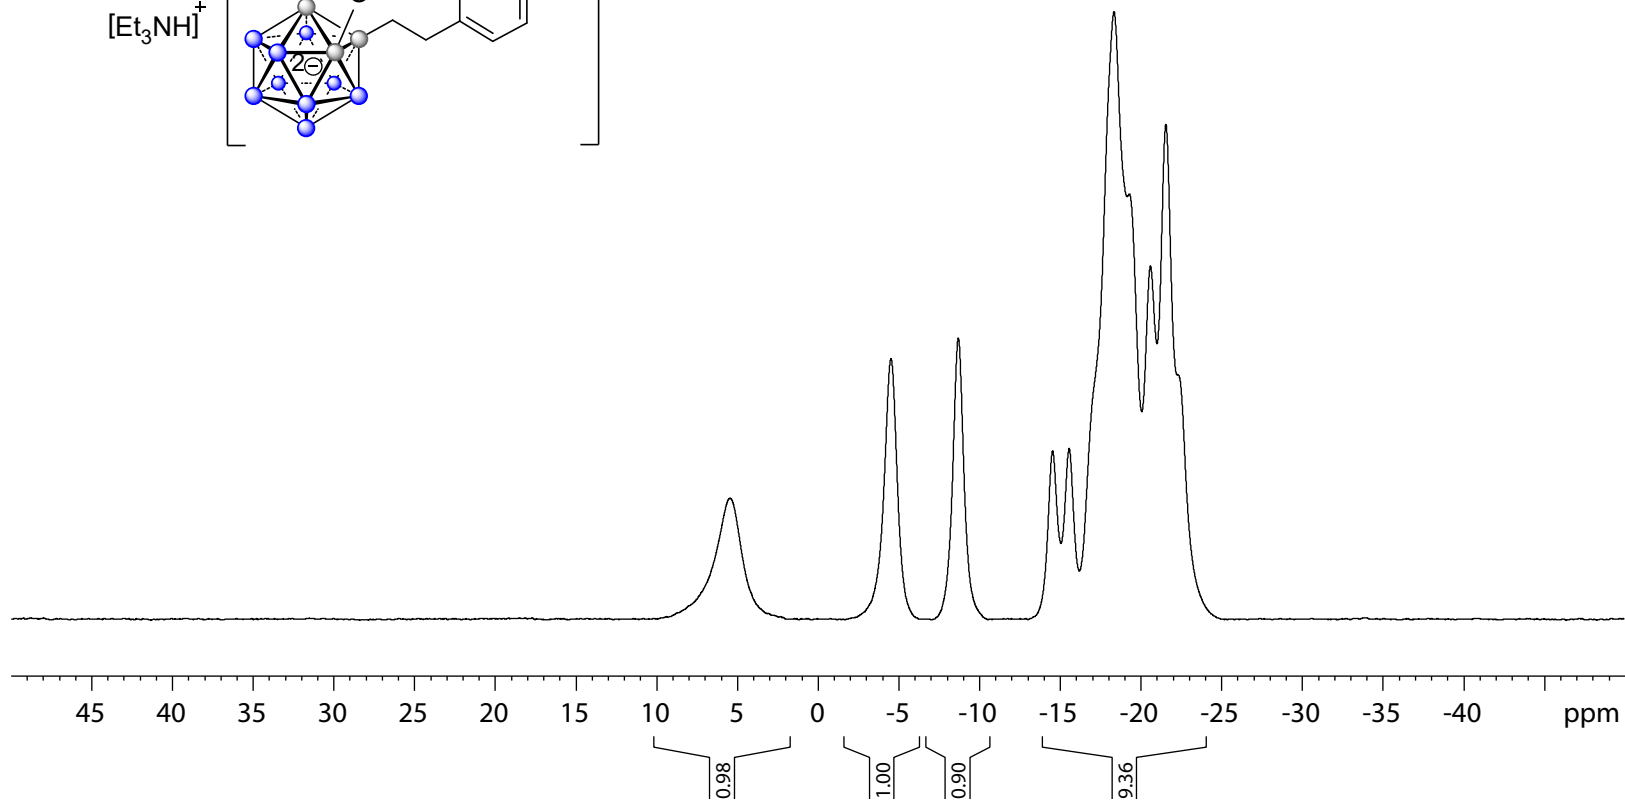

Current Data Parameters  
NAME 20190401- RD-B12M-4Cl-STYR  
EXPNO 3  
PROCNO 1

F2 - Acquisition Parameters  
Date 20190402  
Time 21.09  
INSTRUM spect  
PROBHD 5 mm PABBO BB/  
PULPROG zg  
TD 65536  
SOLVENT Acetone  
NS 128  
DS 4  
SWH 25510.203 Hz  
FIDRES 0.389255 Hz  
AQ 1.2845056 sec  
RG 193.34  
DW 19.600 usec  
DE 6.50 usec  
TE 296.1 K  
D1 1.00000000 sec  
TD0 1

===== CHANNEL f1 =====  
NUC1 11B  
P1 9.93 usec  
PLW1 52.96599960 W  
SFO1 128.3776052 MHz

F2 - Processing parameters  
SI 32768  
SF 128.3776050 MHz  
WDW EM  
SSB 0  
LB 10.00 Hz  
GB 0  
PC 1.40

20190401-B12M-4ClStyr 20 mg white solid  $[\text{Et}_3\text{NH}][\text{B}_{12}\text{H}_{10}\text{NHC}(\text{Menthyl})\text{OCH}_2\text{CH}_2\text{C}_6\text{H}_4\text{Cl}]$  dissolved in 0.6 mL acetone- $d_6^*$

$^{11}\text{B}\{^1\text{H}\}$  NMR 128MHz

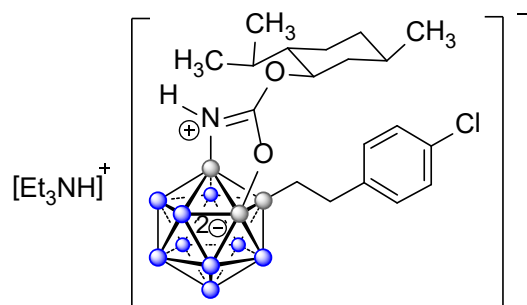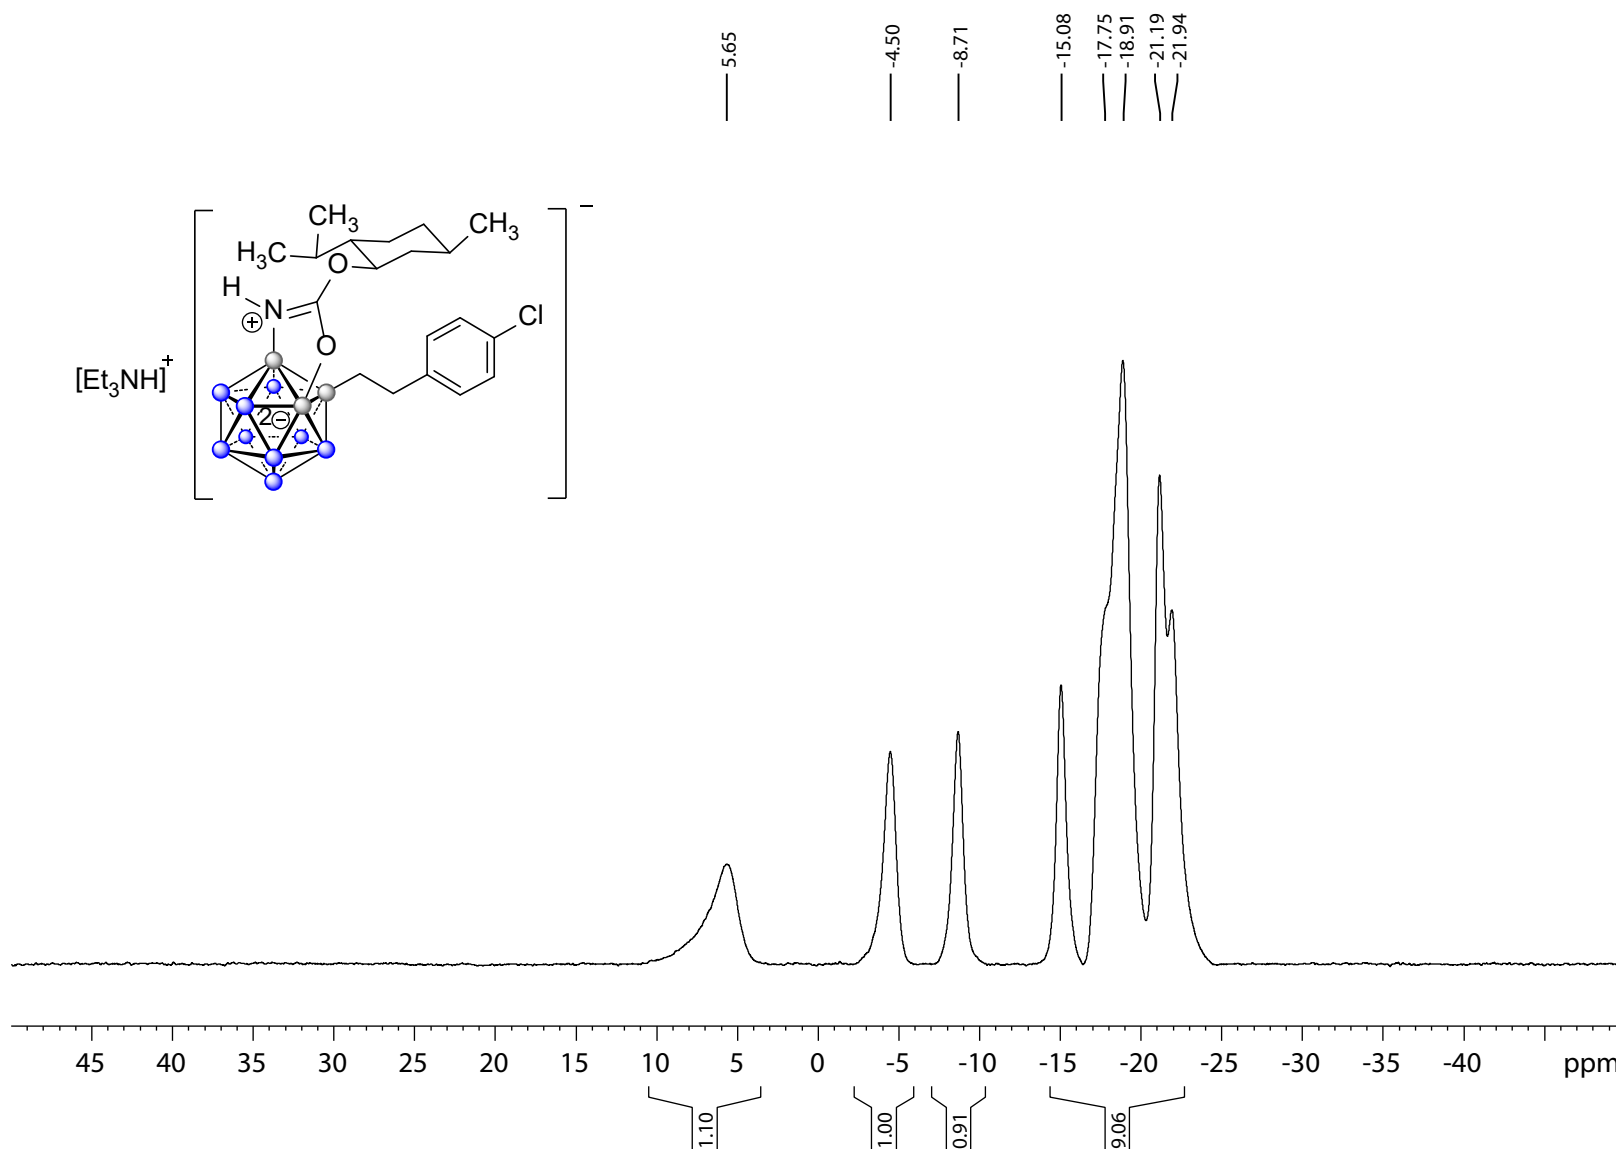

Current Data Parameters  
 NAME 20190401 RD-B12M-4Cl-STYR  
 EXPNO 4  
 PROCNO 1

F2 - Acquisition Parameters  
 Date\_ 20190402  
 Time 21.15  
 INSTRUM spect  
 PROBHD 5 mm PABBO BB/  
 PULPROG zgpg30  
 TD 65536  
 SOLVENT Acetone  
 NS 128  
 DS 4  
 SWH 25510.203 Hz  
 FIDRES 0.389255 Hz  
 AQ 1.2845056 sec  
 RG 193.34  
 DW 19.600 usec  
 DE 6.50 usec  
 TE 296.9 K  
 D1 1.00000000 sec  
 D11 0.03000000 sec  
 TD0 1

==== CHANNEL f1 =====  
 NUC1 11B  
 P1 9.93 usec  
 PLW1 52.96599960 W  
 SFO1 128.3776050 MHz

==== CHANNEL f2 =====  
 CPDPRG2 waltz16  
 NUC2 1H  
 PCPD2 80.00 usec  
 PLW2 12.50000000 W  
 PLW12 0.43945000 W  
 PLW13 0.28125000 W  
 SFO2 400.1320007 MHz

F2 - Processing parameters  
 SI 32768  
 SF 128.3776050 MHz  
 WDW EM  
 SSB 0  
 LB 10.00 Hz  
 GB 0  
 PC 1.40

20190401-B12M-4ClStyr 20 mg white solid  $[\text{Et}_3\text{NH}][\text{B}_{12}\text{H}_{10}\text{NHC}(\text{Menthyl})\text{OCH}_2\text{CH}_2\text{C}_6\text{H}_4\text{Cl}]$  dissolved in 0.6 mL acetone- $d_6^*$

$^{13}\text{C}\{^1\text{H}\}$  NMR 100 MHz

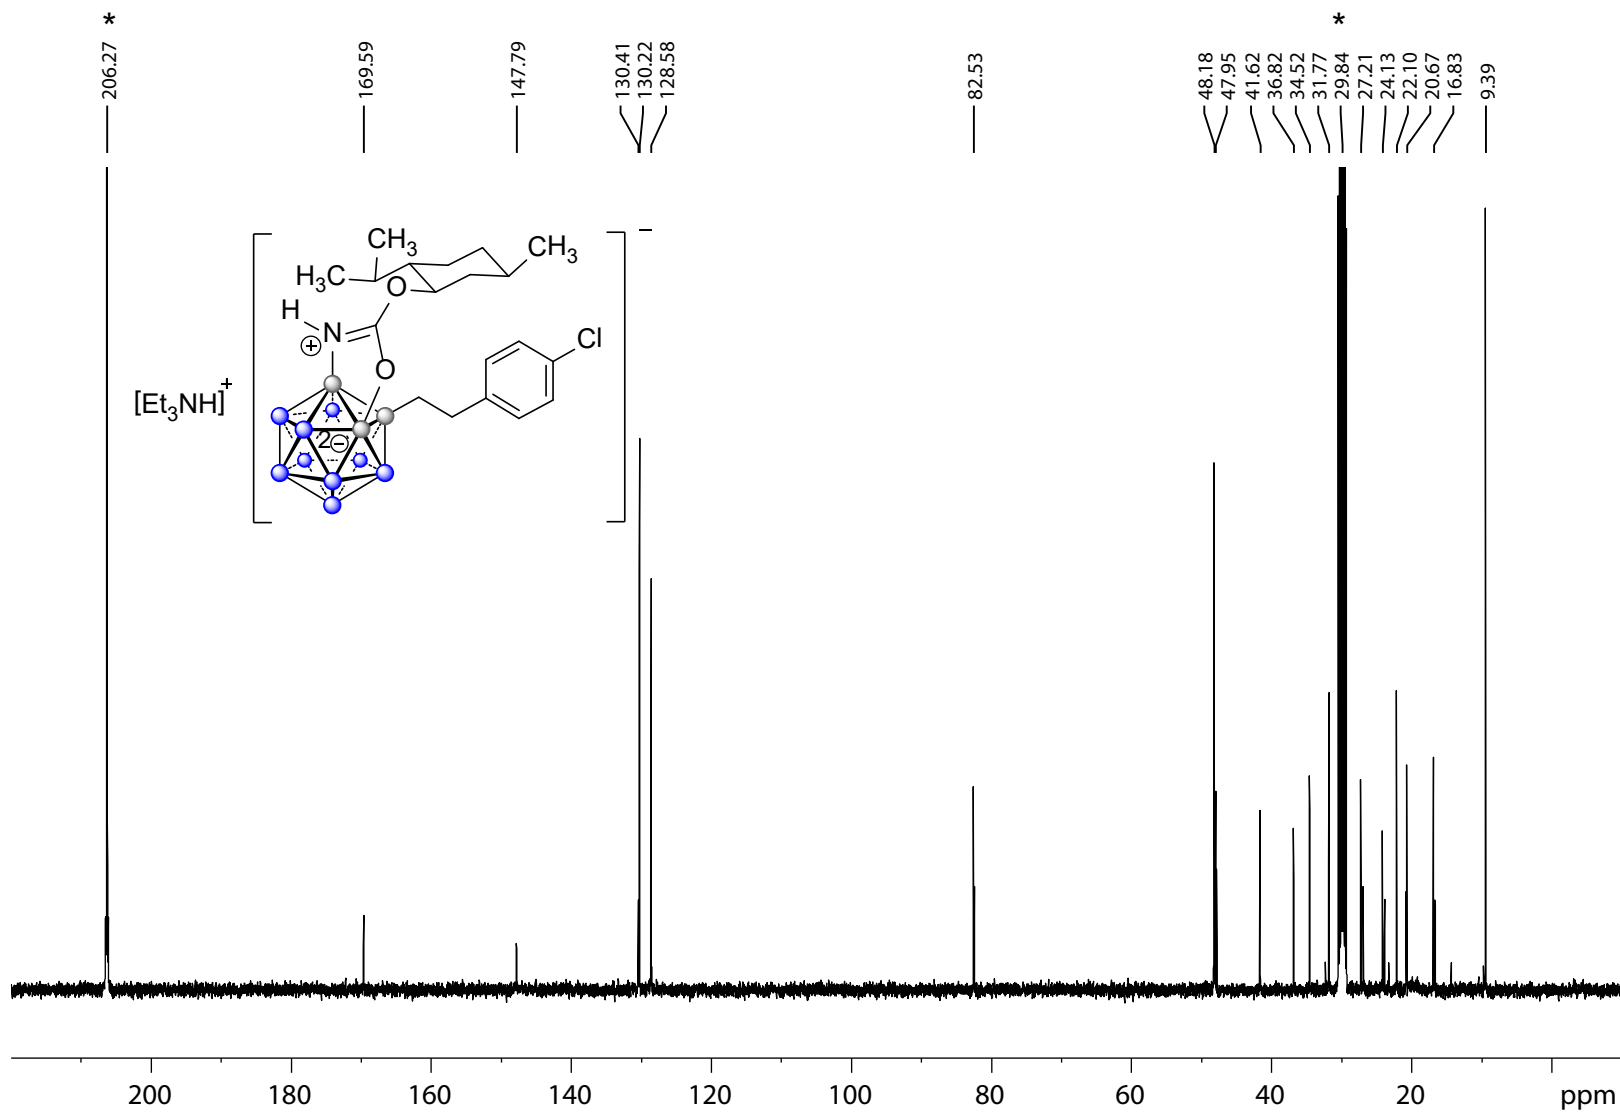

Current Data Parameters  
 NAME 20190401-RD--B12M-4CI-STYR  
 EXPNO 5  
 PROCNO 1

F2 - Acquisition Parameters  
 Date\_ 20190402  
 Time 22.02  
 INSTRUM spect  
 PROBHD 5 mm PABBO BB/  
 PULPROG zgpg30  
 TD 65536  
 SOLVENT Acetone  
 NS 1024  
 DS 4  
 SWH 29761.904 Hz  
 FIDRES 0.454131 Hz  
 AQ 1.1010048 sec  
 RG 193.34  
 DW 16.800 usec  
 DE 6.50 usec  
 TE 297.0 K  
 D1 1.50000000 sec  
 D11 0.03000000 sec  
 TD0 1

===== CHANNEL f1 =====  
 NUC1 13C  
 P1 10.00 usec  
 PLW1 53.00000000 W  
 SFO1 100.6228293 MHz

===== CHANNEL f2 =====  
 CPDPRG[2] waltz16  
 NUC2 1H  
 PCPD2 80.00 usec  
 PLW2 12.50000000 W  
 PLW12 0.43945000 W  
 PLW13 0.28125000 W  
 SFO2 400.1316005 MHz

F2 - Processing parameters  
 SI 32768  
 SF 100.6126841 MHz  
 WDW EM  
 SSB 0  
 LB 1.00 Hz  
 GB 0  
 PC 1.40

20190401-B12M-4ClStyr 20 mg white solid [Et<sub>3</sub>NH][B<sub>12</sub>H<sub>10</sub>NHC(Menthyl)OCH<sub>2</sub>CH<sub>2</sub>C<sub>6</sub>H<sub>4</sub>Cl] dissolved in 0.6 mL acetone-d<sub>6</sub>\*

<sup>13</sup>C DEPT NMR 100 MHz

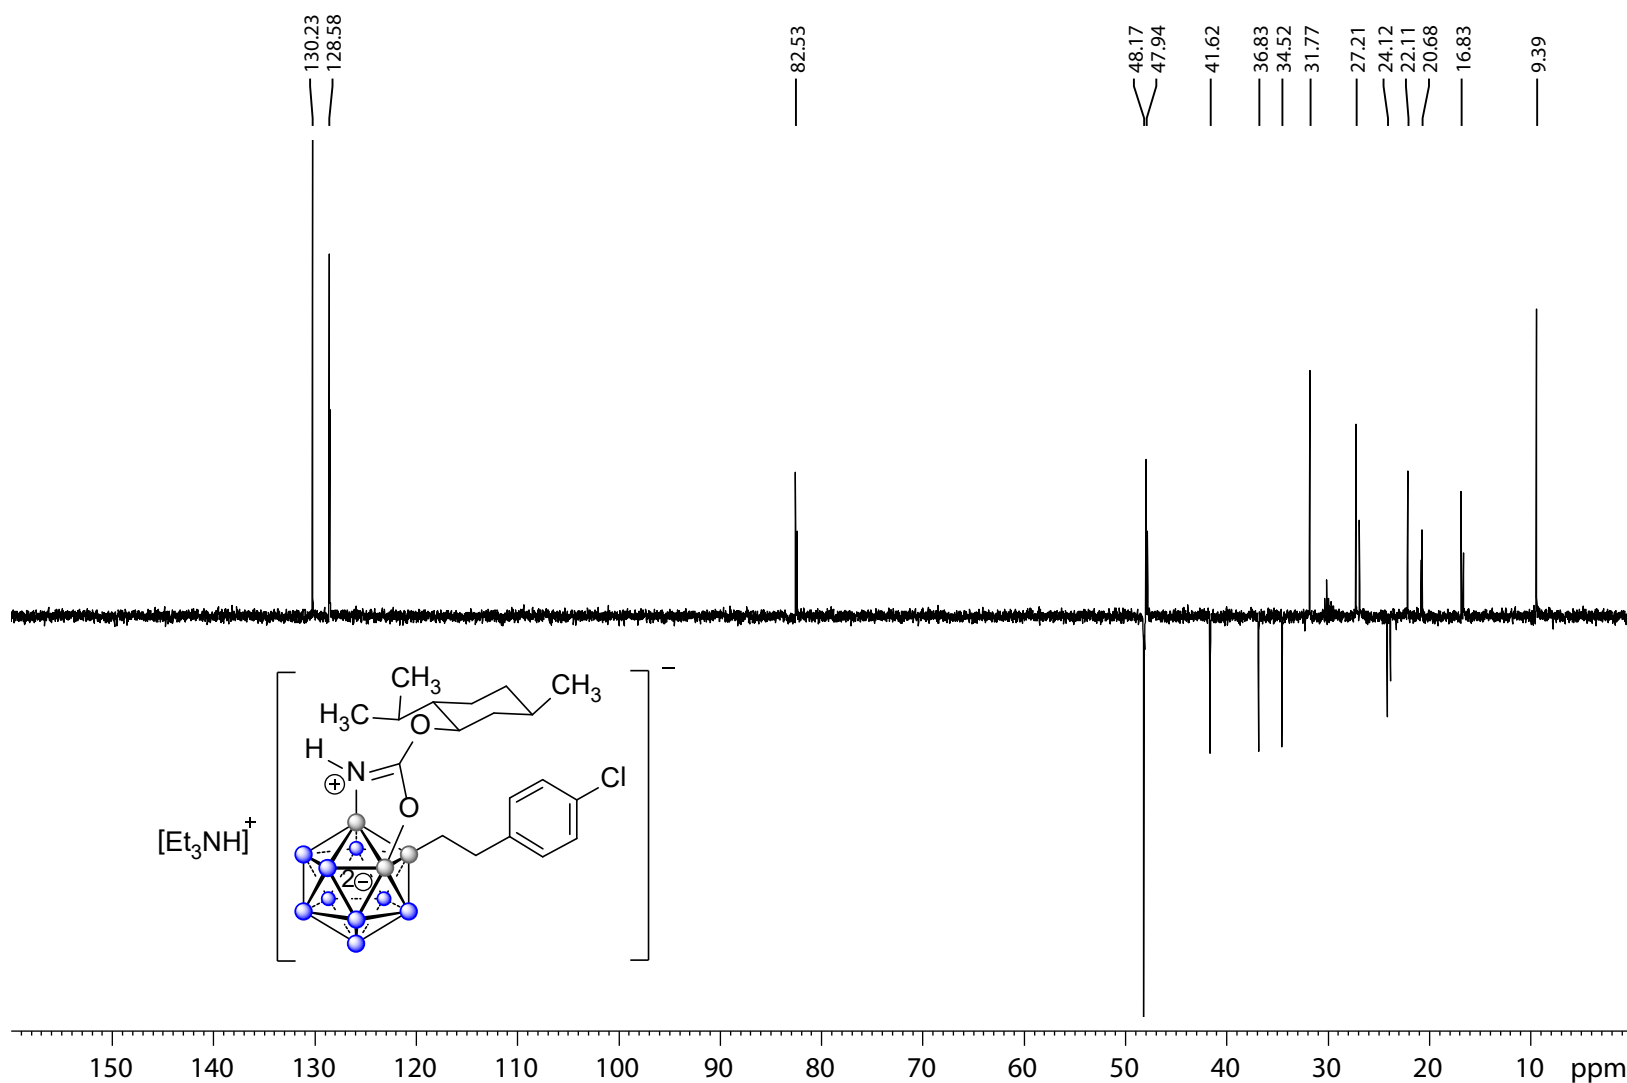

Current Data Parameters  
NAME 20190401-RD-B12M-4Cl-STYR  
EXPNO 6  
PROCNO 1

F2 - Acquisition Parameters  
Date\_ 20190402  
Time 22.16  
INSTRUM spect  
PROBHD 5 mm PABBO BB/  
PULPROG dept135  
TD 65536  
SOLVENT Acetone  
NS 256  
DS 4  
SWH 29296.875 Hz  
FIDRES 0.447035 Hz  
AQ 1.1184810 sec  
RG 193.34  
DW 17.067 usec  
DE 6.50 usec  
TE 296.5 K  
CNST2 145.0000000  
D1 2.00000000 sec  
D2 0.00344828 sec  
D12 0.00002000 sec  
TD0 1

===== CHANNEL f1 =====  
NUC1 <sup>13</sup>C  
P1 10.00 usec  
P2 20.00 usec  
PLW1 53.00000000 W  
SFO1 100.6228293 MHz

===== CHANNEL f2 =====  
CPDPRG[2] waltz16  
NUC2 <sup>1</sup>H  
P3 15.00 usec  
P4 30.00 usec  
PCPD2 80.00 usec  
PLW2 12.50000000 W  
PLW12 0.43945000 W  
SFO2 400.1316005 MHz

F2 - Processing parameters  
SI 32768  
SF 100.6126839 MHz  
WDW EM  
SSB 0  
LB 1.00 Hz  
GB 0  
PC 4.00

20190401-B12M-4CIStyr 20 mg white solid [Et<sub>3</sub>NH][B<sub>12</sub>H<sub>10</sub>NHC(Menthyl)OCH<sub>2</sub>CH<sub>2</sub>C<sub>6</sub>H<sub>4</sub>Cl] dissolved in 0.6 mL acetone-d<sub>6</sub>\*

<sup>1</sup>H - <sup>1</sup>H COSY NMR

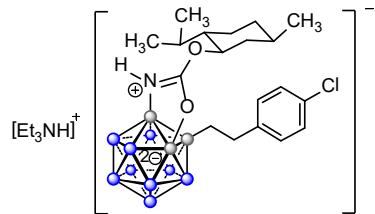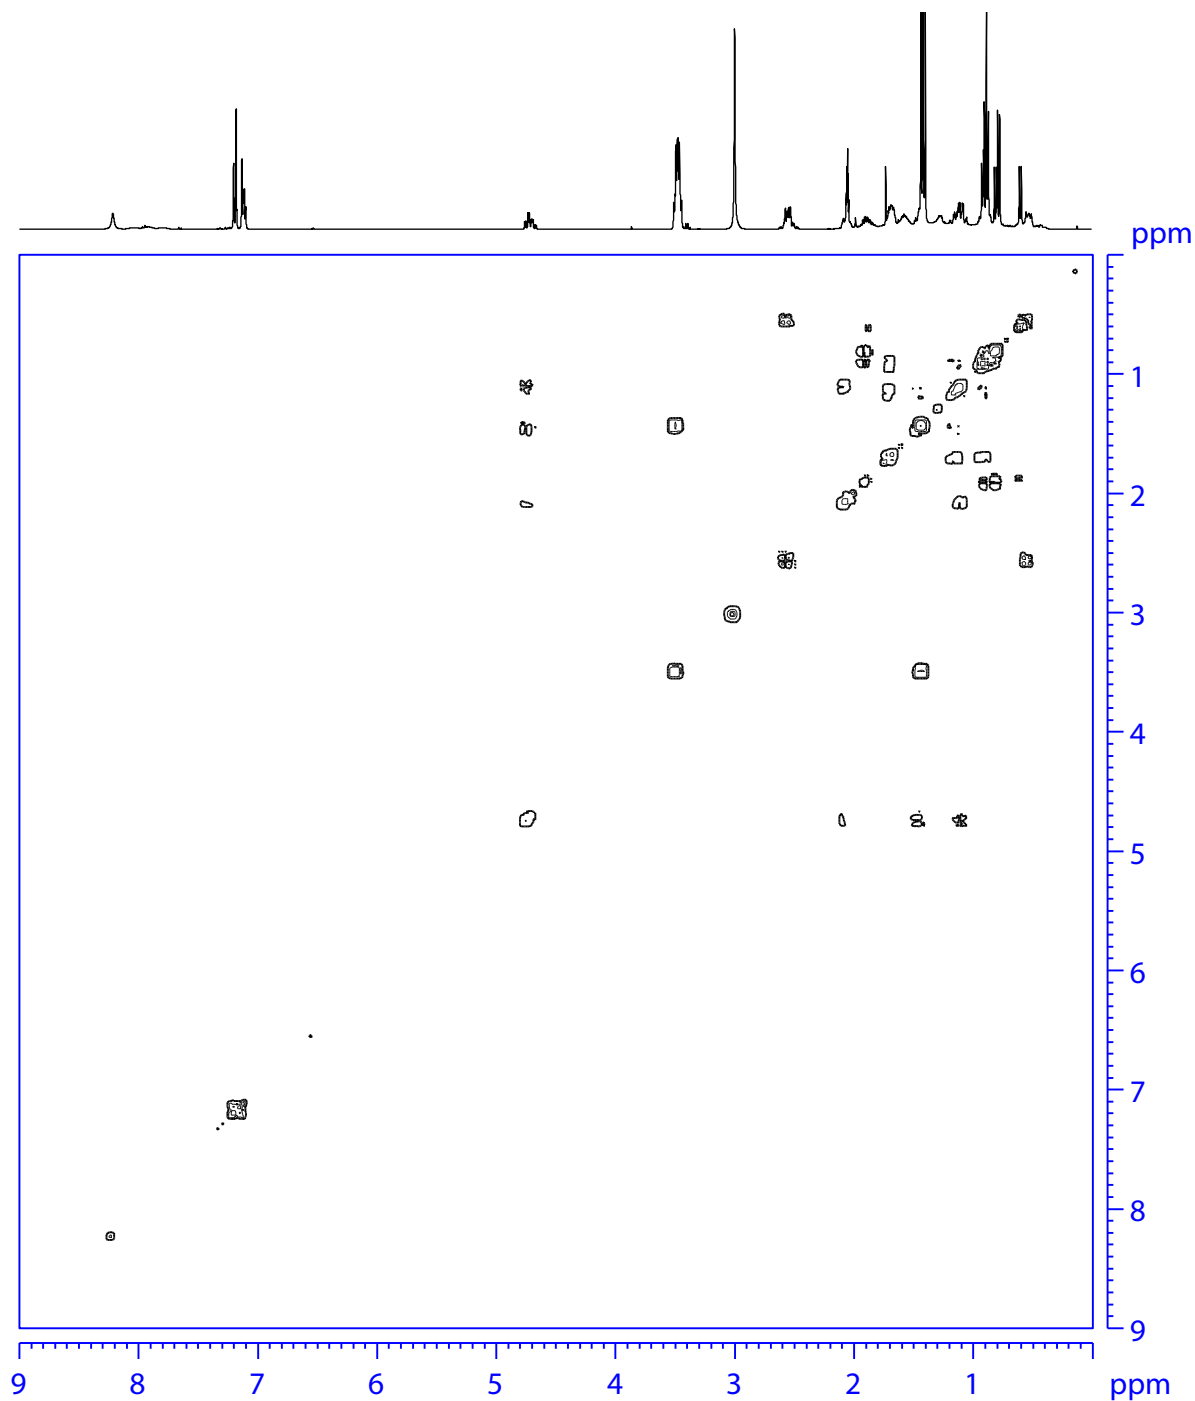

Current Data Parameters  
NAME 20190401-RD--B12M-4CI-STYR  
EXPNO 7  
PROCNO 1

F2 - Acquisition Parameters  
Date\_ 20190402  
Time 22.17  
INSTRUM spect  
PROBHD 5 mm PABBO BB/  
PULPROG cosygpppqf  
TD 2048  
SOLVENT Acetone  
NS 2  
DS 8  
SWH 5341.880 Hz  
FIDRES 2.608340 Hz  
AQ 0.1916928 sec  
RG 124.48  
DW 93.600 usec  
DE 6.50 usec  
TE 296.3 K  
D0 0.0000300 sec  
D1 2.00000000 sec  
D11 0.03000000 sec  
D12 0.00002000 sec  
D13 0.00000400 sec  
D16 0.00020000 sec  
IN0 0.00018720 sec

===== CHANNEL f1 =====  
NUC1 1H  
P0 15.00 usec  
P1 15.00 usec  
P17 2500.00 usec  
PLW1 12.50000000 W  
PLW10 4.16050005 W  
SFO1 400.1324057 MHz

===== GRADIENT CHANNEL =====  
GPNAM[1] SMSQ10.100  
GPZ1 10.00 %  
P16 1000.00 usec

F1 - Acquisition parameters  
TD 128  
SFO1 400.1324 MHz  
FIDRES 83.466881 Hz  
SW 13.350 ppm  
FnMODE QF

F2 - Processing parameters  
SI 1024  
SF 400.1300000 MHz  
WDW QSINE  
SSB 0  
LB 0 Hz  
GB 0  
PC 1.40

F1 - Processing parameters  
SI 1024  
MC2 QF  
SF 400.1300000 MHz  
WDW QSINE  
SSB 0  
LB 0 Hz  
GB 0

$^1\text{H} - ^{13}\text{C}$  HSQC NMR

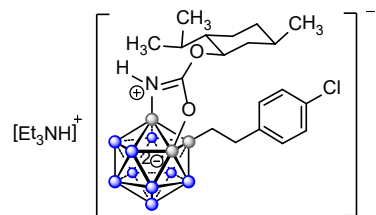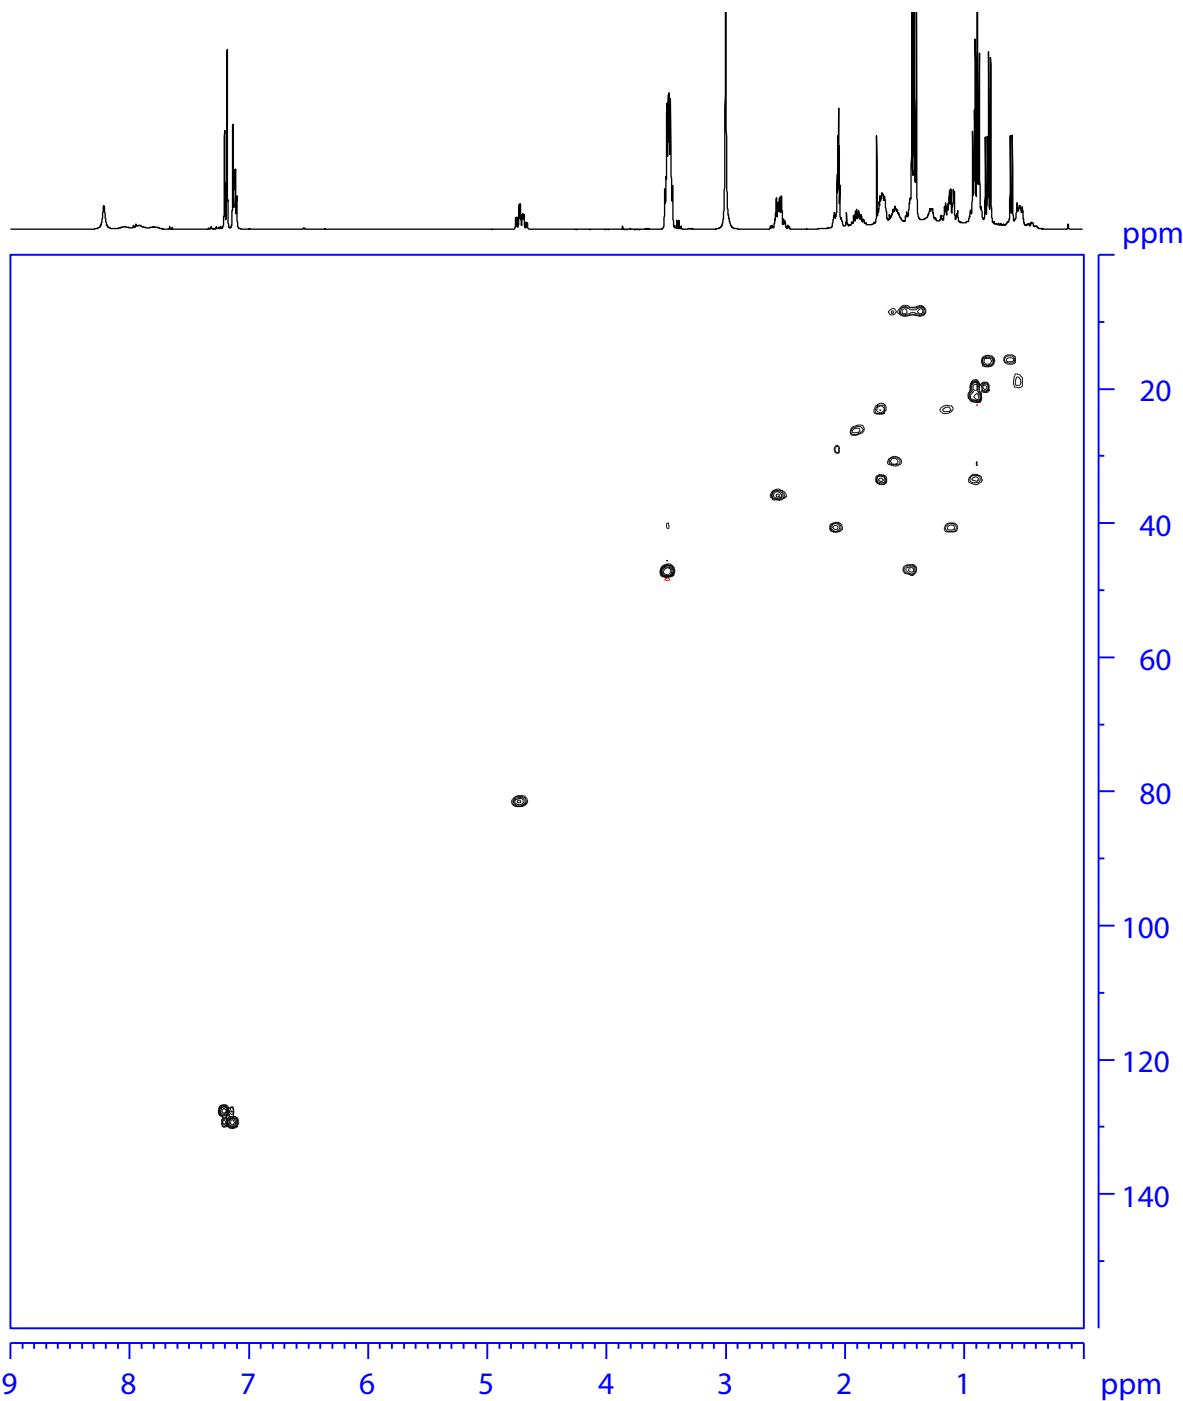

Current Data Parameters  
 NAME 20190401-B12M-4Cl-STYR  
 EXPNO 8  
 PROCNO 1

F2 - Acquisition Parameters  
 Date\_ 20190402  
 Time 22.28  
 INSTRUM spect  
 PROBHD 5 mm PABBO BB/  
 PULPROG hsqcetgpsi2  
 TD 1024  
 SOLVENT Acetone  
 NS 2  
 DS 16  
 SWH 6009.615 Hz  
 FIDRES 5.868765 Hz  
 AQ 0.0851968 sec  
 RG 193.34  
 DW 83.200 usec  
 DE 6.50 usec  
 TE 296.2 K  
 CNST2 145.000000  
 D0 0.00000300 sec  
 D1 1.50000000 sec  
 D4 0.00172414 sec  
 D11 0.03000000 sec  
 D16 0.00020000 sec  
 D24 0.00086207 sec  
 IN0 0.00001990 sec  
 ZGOPTNS

===== CHANNEL f1 =====  
 NUC1  $^1\text{H}$   
 P1 15.00 usec  
 P2 30.00 usec  
 P28 1000.00 usec  
 PLW1 12.50000000 W  
 SFO1 400.1328009 MHz

===== CHANNEL f2 =====  
 CPDPRG2 garp  
 NUC2  $^{13}\text{C}$   
 P3 10.00 usec  
 P4 20.00 usec  
 PCPD2 70.00 usec  
 PLW2 53.00000000 W  
 PLW12 1.08159995 W  
 SFO2 100.6238364 MHz

===== GRADIENT CHANNEL =====  
 GPNAM[1] SMSQ10.100  
 GPNAM[2] SMSQ10.100  
 GPNAM[3] SMSQ10.100  
 GPNAM[4] SMSQ10.100  
 GPZ1 80.00 %  
 GPZ2 20.10 %  
 GPZ3 11.00 %  
 GPZ4 -5.00 %  
 P16 1000.00 usec  
 P19 600.00 usec

F1 - Acquisition parameters  
 TD 256  
 SFO1 100.6238 MHz  
 FIDRES 196.524048 Hz  
 SW 249.991 ppm  
 FnMODE Echo-Antiecho

F2 - Processing parameters  
 SI 1024  
 SF 400.1300000 MHz  
 WDW QSINE  
 SSB 2  
 LB 0 Hz  
 GB 0  
 PC 1.40

F1 - Processing parameters  
 SI 1024  
 MC2 echo-antiecho  
 SF 100.6127690 MHz  
 WDW QSINE  
 SSB 2  
 LB 0 Hz  
 GB 0

20190401-B12M-4BrStyr 20 mg white solid  $[\text{Et}_3\text{NH}][\text{B}_{12}\text{H}_{10}\text{NHC}(\text{Menthyl})\text{OCH}_2\text{CH}_2\text{C}_6\text{H}_4\text{Br}]$  dissolved in 0.6 mL acetone- $d_6^*$

400MHz  $^1\text{H}$  NMR,  $\circ$  deuterated solvent residual peak = 2.05 ppm;  $\diamond$  water peak

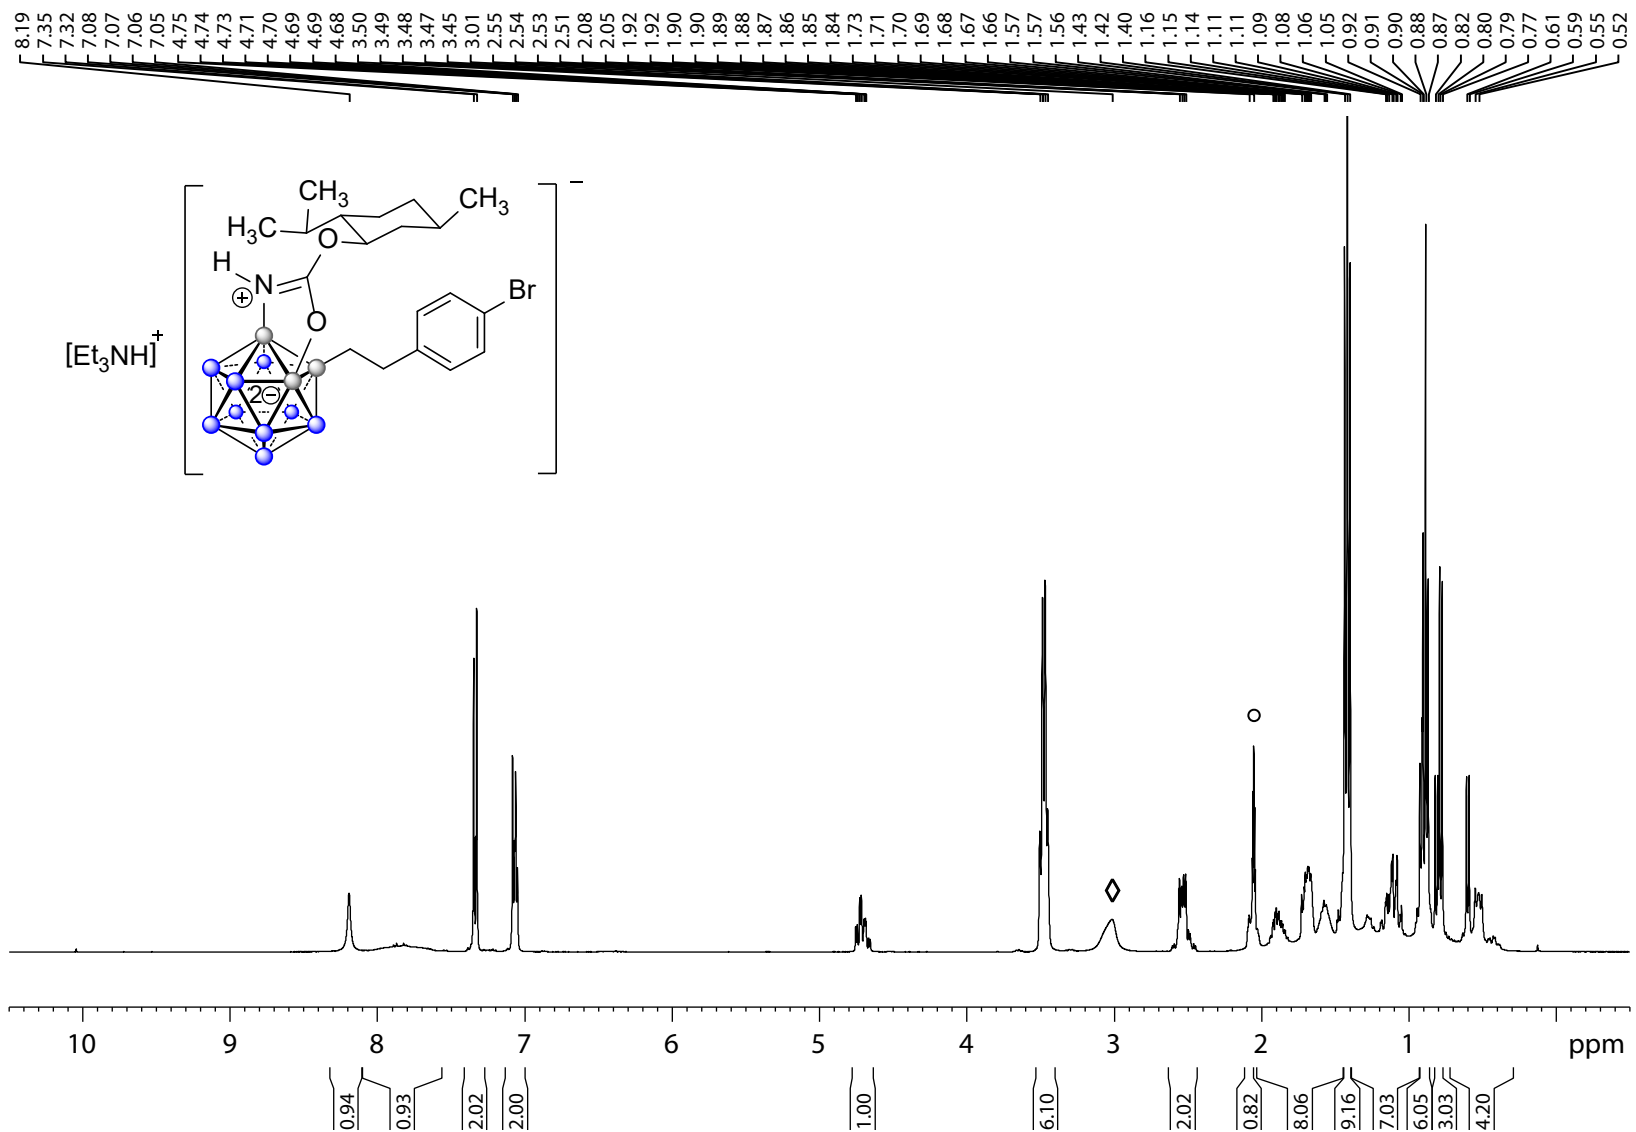

Current Data Parameters  
 NAME 20190401-RV-B12M-4-BrSTYR  
 EXPNO 1  
 PROCNO 1

F2 - Acquisition Parameters  
 Date\_ 20190402  
 Time\_ 12.52  
 INSTRUM spect  
 PROBHD 5 mm PABBO BB/  
 PULPROG zg30  
 TD 65536  
 SOLVENT Acetone  
 NS 16  
 DS 2  
 SWH 10000.000 Hz  
 FIDRES 0.152588 Hz  
 AQ 3.2767999 sec  
 RG 55.74  
 DW 50.000 usec  
 DE 6.50 usec  
 TE 296.2 K  
 D1 1.00000000 sec  
 TD0 1

===== CHANNEL f1 =====  
 NUC1 1H  
 P1 15.00 usec  
 PLW1 12.5000000 W  
 SFO1 400.1328009 MHz

F2 - Processing parameters  
 SI 65536  
 SF 400.1300071 MHz  
 WDW EM  
 SSB 0  
 LB 0.30 Hz  
 GB 0  
 PC 1.00



20190401-B12M-4BrStyr 20 mg white solid  $[\text{Et}_3\text{NH}][\text{B}_{12}\text{H}_{10}\text{NHC}(\text{Menthyl})\text{OCH}_2\text{CH}_2\text{C}_6\text{H}_4\text{Br}]$  dissolved in 0.6 mL acetone- $d_6$ \*

400MHz  $^1\text{H}\{\text{B}\}$  NMR,  $\circ$  deuterated solvent residual peak= 2.05 ppm;  $\diamond$  water peak

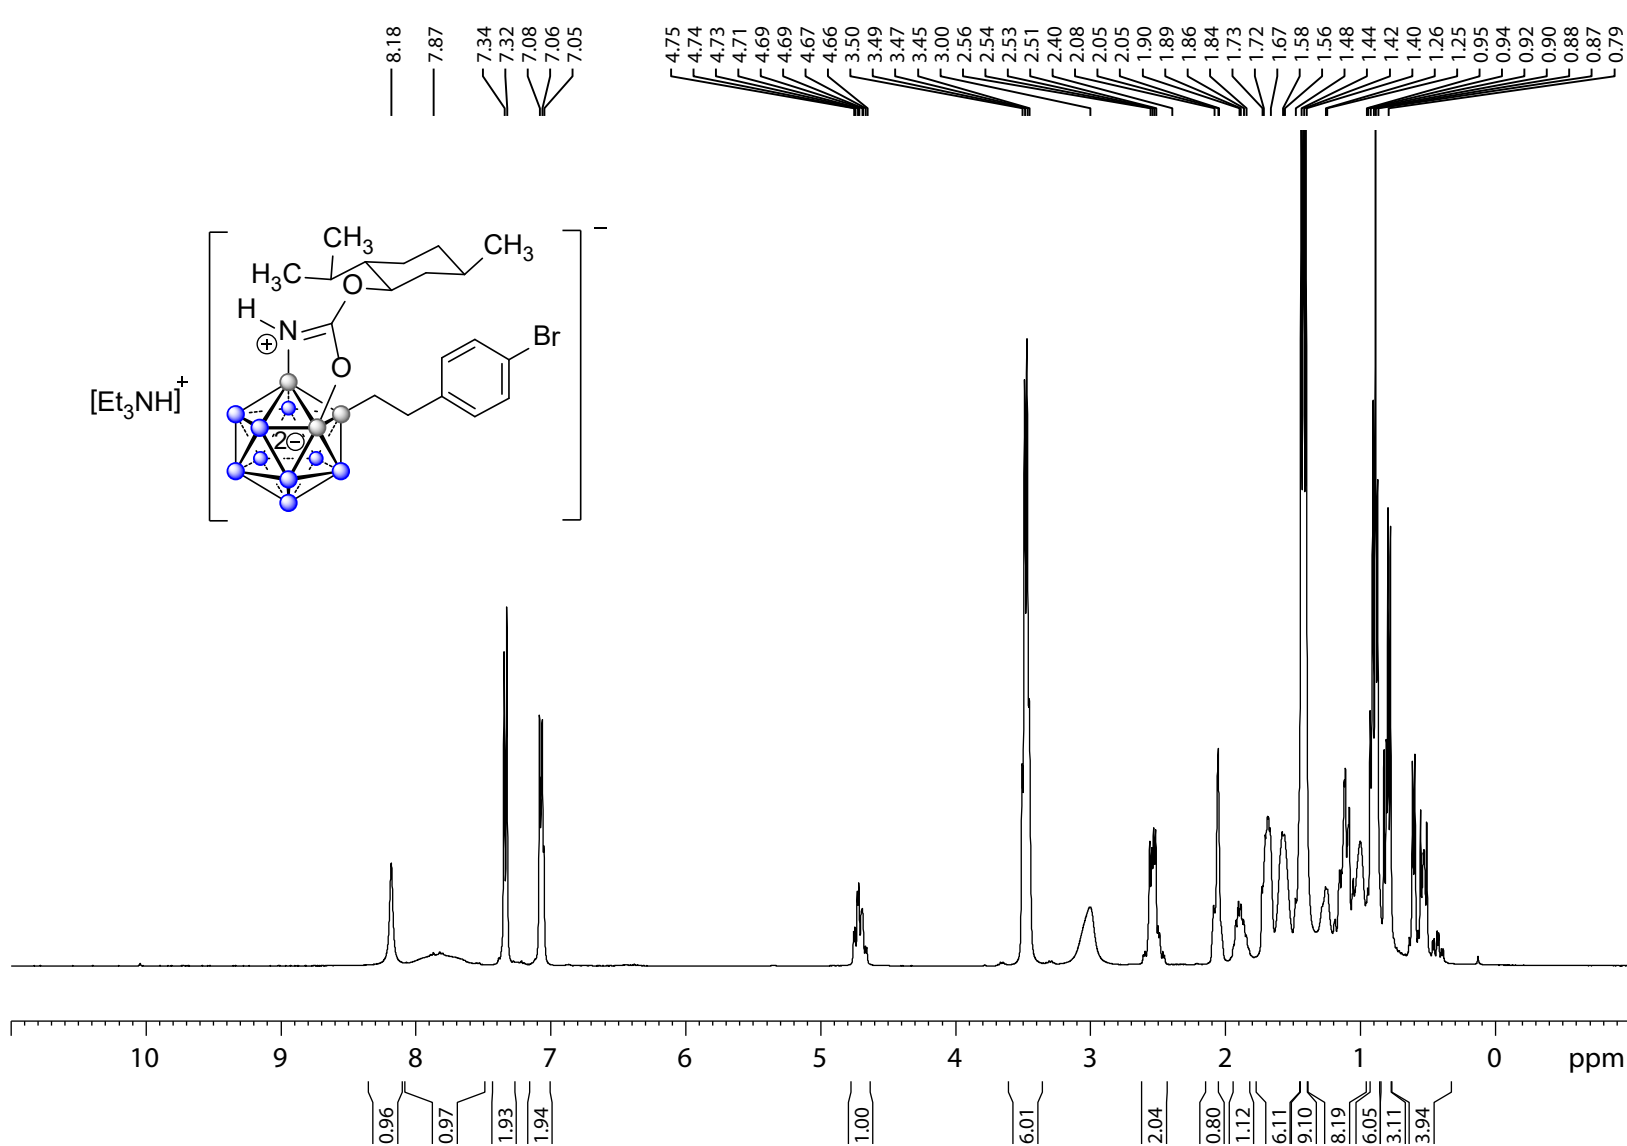

Current Data Parameters  
 NAME 20190401-RV-B12M-4-BrSTYR  
 EXPNO 2  
 PROCNO 1

F2 - Acquisition Parameters  
 Date\_ 20190402  
 Time\_ 12.54  
 INSTRUM spect  
 PROBHD 5 mm PABBO BB/  
 PULPROG zgig30  
 TD 16384  
 SOLVENT Acetone  
 NS 16  
 DS 4  
 SWH 8012.820 Hz  
 FIDRES 0.489064 Hz  
 AQ 1.0223616 sec  
 RG 55.74  
 DW 62.400 usec  
 DE 6.50 usec  
 TE 296.5 K  
 D1 1.00000000 sec  
 D11 0.03000000 sec  
 TD0 1

==== CHANNEL f1 =====  
 NUC1 1H  
 P1 15.00 usec  
 PLW1 12.50000000 W  
 SFO1 400.1320007 MHz

==== CHANNEL f2 =====  
 CPDPRG[2] garp4  
 NUC2 11B  
 PCPD2 90.00 usec  
 PLW2 52.96599960 W  
 PLW12 0.64477998 W  
 SFO2 128.3776050 MHz

F2 - Processing parameters  
 SI 32768  
 SF 400.1300074 MHz  
 WDW EM  
 SSB 0  
 LB 1.00 Hz  
 GB 0  
 PC 1.40

20190401-B12M-4BrStyr 20 mg white solid [Et<sub>3</sub>NH][B<sub>12</sub>H<sub>10</sub>NHC(Menthyl)OCH<sub>2</sub>CH<sub>2</sub>C<sub>6</sub>H<sub>4</sub>Br] dissolved in 0.6 mL acetone-*d*<sub>6</sub>\*

<sup>11</sup>B NMR 128MHz

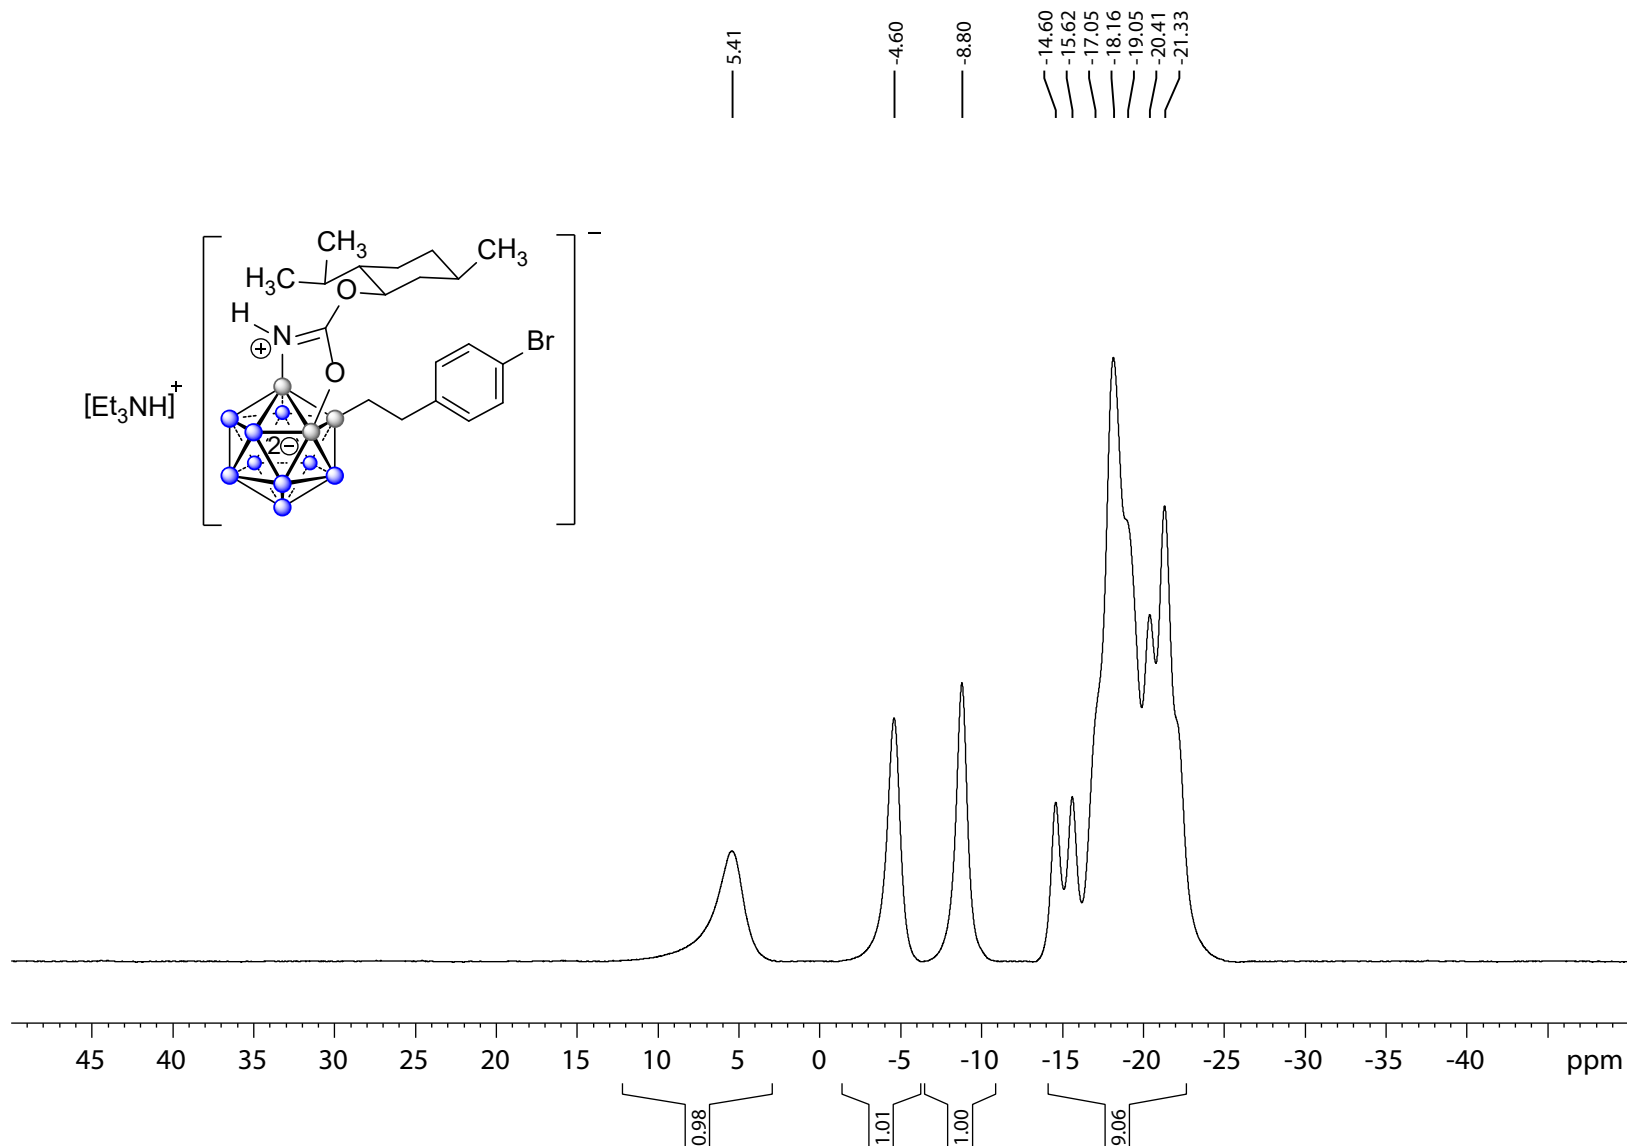

Current Data Parameters  
 NAME 20190401-RV-B12M-4-BrSTYR  
 EXPNO 4  
 PROCNO 1

F2 - Acquisition Parameters  
 Date\_ 20190402  
 Time 13.00  
 INSTRUM spect  
 PROBHD 5 mm PABBO BB/  
 PULPROG zg  
 TD 65536  
 SOLVENT Acetone  
 NS 128  
 DS 4  
 SWH 25510.203 Hz  
 FIDRES 0.389255 Hz  
 AQ 1.2845056 sec  
 RG 193.34  
 DW 19.600 usec  
 DE 6.50 usec  
 TE 296.2 K  
 D1 1.00000000 sec  
 TD0 1

===== CHANNEL f1 =====  
 NUC1 <sup>11</sup>B  
 P1 9.93 usec  
 PLW1 52.96599960 W  
 SFO1 128.3776052 MHz

F2 - Processing parameters  
 SI 32768  
 SF 128.3776050 MHz  
 WDW EM  
 SSB 0  
 LB 10.00 Hz  
 GB 0  
 PC 1.40

20190401-B12M-4BrStyr 20 mg white solid  $[\text{Et}_3\text{NH}][\text{B}_{12}\text{H}_{10}\text{NHC}(\text{Menthyl})\text{OCH}_2\text{CH}_2\text{C}_6\text{H}_4\text{Br}]$  dissolved in 0.6 mL acetone- $d_6$ \*

$^{11}\text{B}\{^1\text{H}\}$  NMR 128MHz

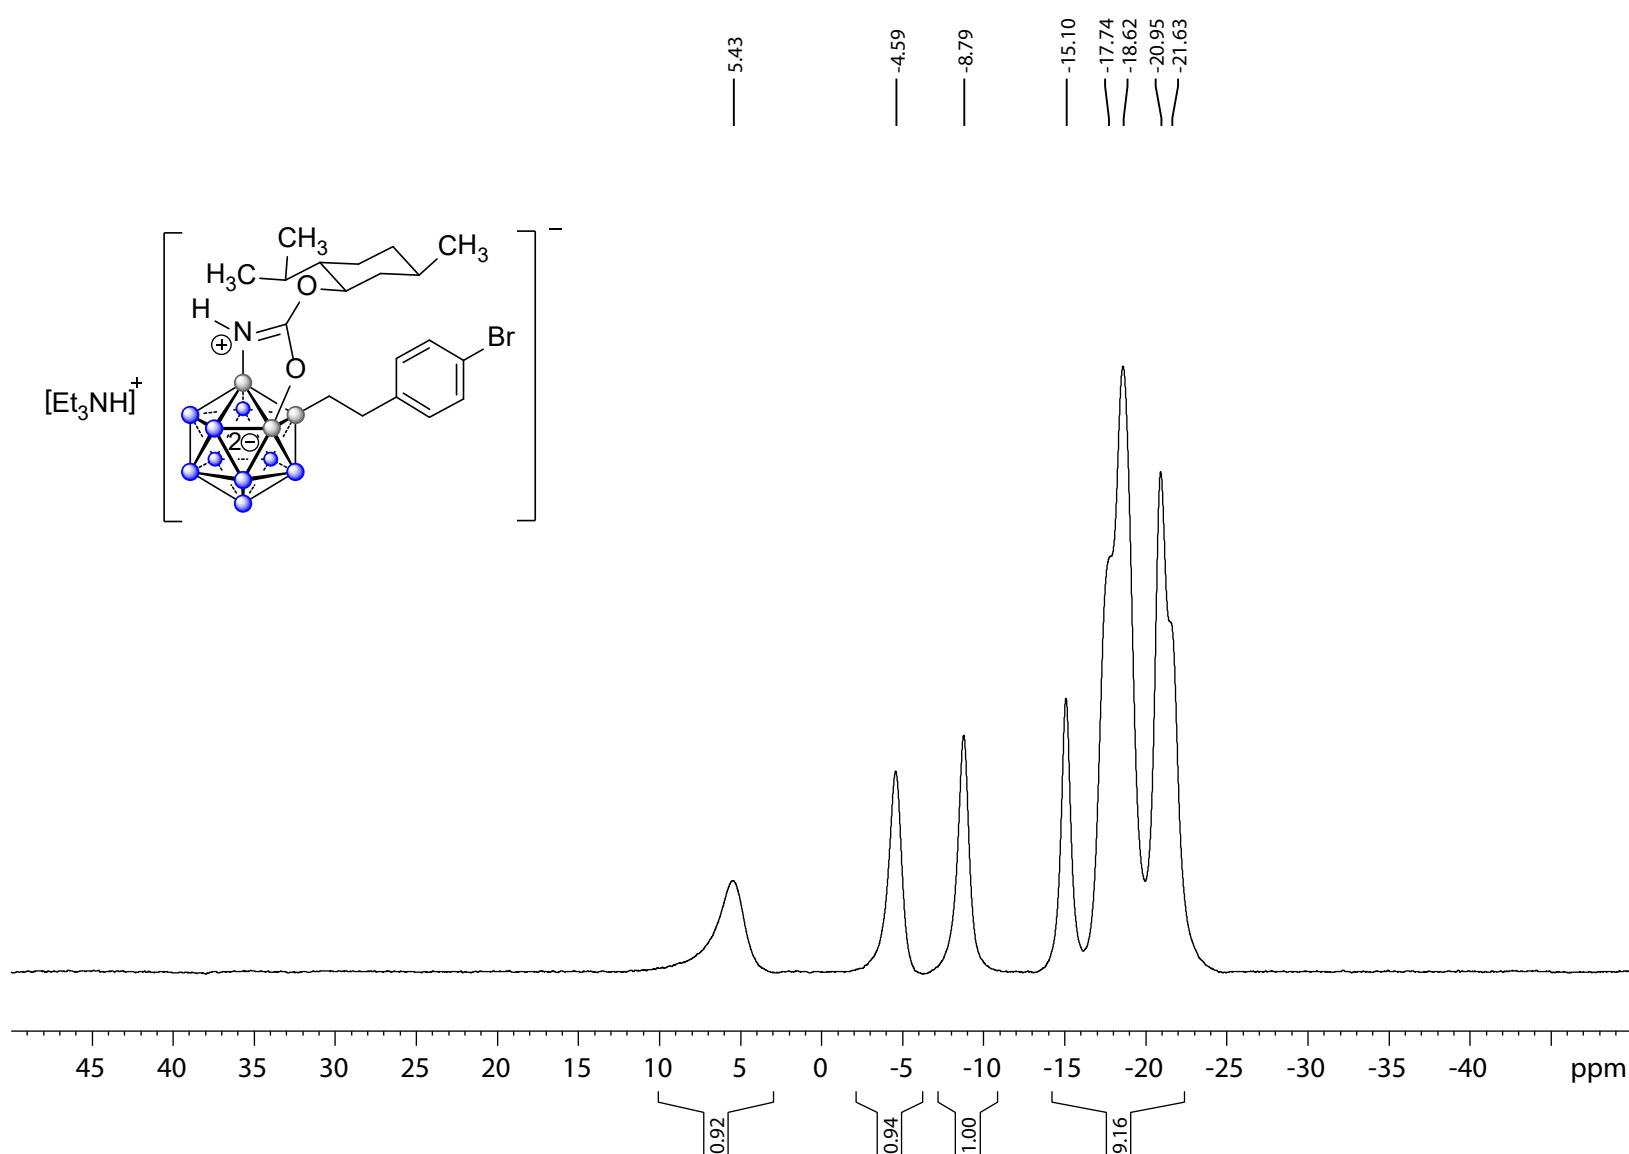

Current Data Parameters  
NAME 20190401-RV-B12M-4-BrSTYR  
EXPNO 5  
PROCNO 1

F2 - Acquisition Parameters  
Date\_ 20190402  
Time 13.06  
INSTRUM spect  
PROBHD 5 mm PABBO BB/  
PULPROG zgpg30  
TD 65536  
SOLVENT Acetone  
NS 128  
DS 4  
SWH 25510.203 Hz  
FIDRES 0.389255 Hz  
AQ 1.2845056 sec  
RG 193.34  
DW 19.600 usec  
DE 6.50 usec  
TE 297.0 K  
D1 1.00000000 sec  
D11 0.03000000 sec  
TD0 1

===== CHANNEL f1 =====  
NUC1 11B  
P1 9.93 usec  
PLW1 52.96599960 W  
SFO1 128.3776050 MHz

===== CHANNEL f2 =====  
CPDPRG[2] waltz16  
NUC2 1H  
PCPD2 80.00 usec  
PLW2 12.50000000 W  
PLW12 0.43945000 W  
PLW13 0.28125000 W  
SFO2 400.1320007 MHz

F2 - Processing parameters  
SI 32768  
SF 128.3776050 MHz  
WDW EM  
SSB 0  
LB 10.00 Hz  
GB 0  
PC 1.40

20190401-B12M-4BrStyr 20 mg white solid  $[\text{Et}_3\text{NH}][\text{B}_{12}\text{H}_{10}\text{NHC}(\text{Menthy})\text{OCH}_2\text{CH}_2\text{C}_6\text{H}_4\text{Br}]$  dissolved in 0.6 mL acetone- $d_6^*$

$^{13}\text{C}\{^1\text{H}\}$  NMR 100 MHz

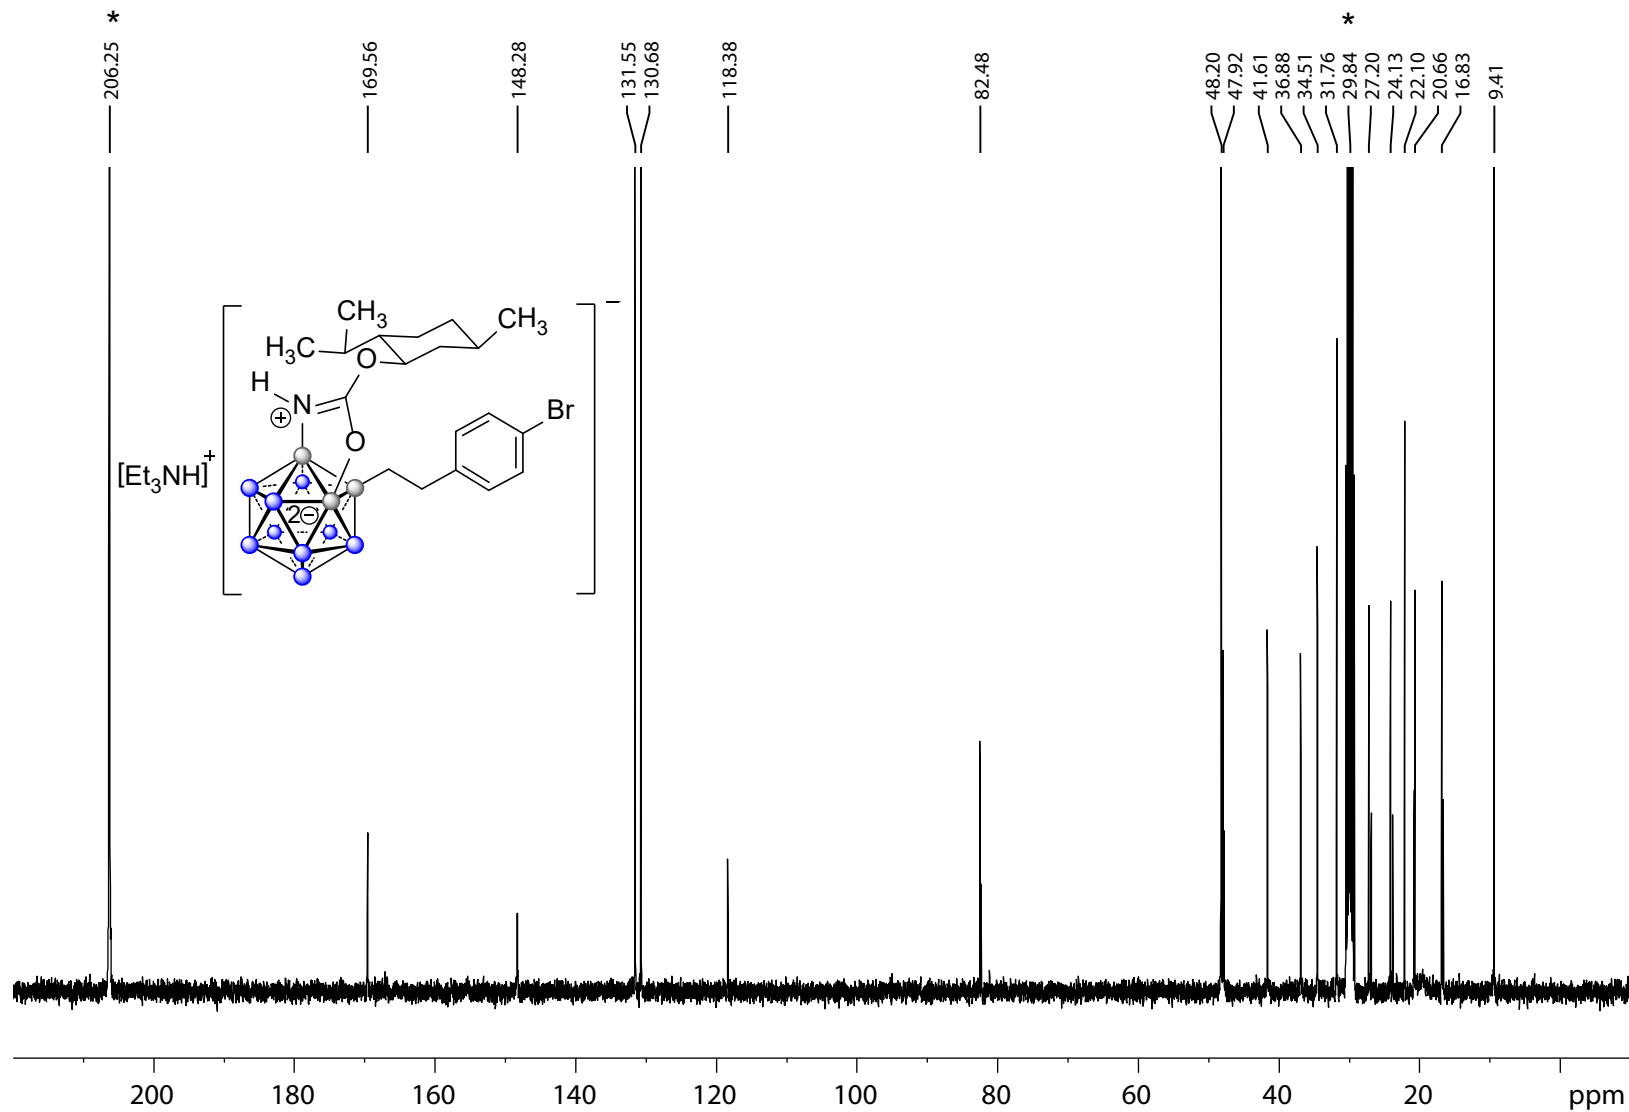

Current Data Parameters  
 NAME 20190401-RV-B12M-4-BrSTYR  
 EXPNO 6  
 PROCNO 1

F2 - Acquisition Parameters  
 Date\_ 20190402  
 Time 20.16  
 INSTRUM spect  
 PROBHD 5 mm PABBO BB/  
 PULPROG zgpg30  
 TD 65536  
 SOLVENT Acetone  
 NS 1024  
 DS 4  
 SWH 29761.904 Hz  
 FIDRES 0.454131 Hz  
 AQ 1.1010048 sec  
 RG 193.34  
 DW 16.800 usec  
 DE 6.50 usec  
 TE 297.1 K  
 D1 1.50000000 sec  
 D11 0.03000000 sec  
 TD0 1

===== CHANNEL f1 =====  
 NUC1  $^{13}\text{C}$   
 P1 10.00 usec  
 PLW1 53.00000000 W  
 SFO1 100.6228293 MHz

===== CHANNEL f2 =====  
 CPDPRG2 waltz16  
 NUC2  $^1\text{H}$   
 PCPD2 80.00 usec  
 PLW2 12.50000000 W  
 PLW12 0.43945000 W  
 PLW13 0.28125000 W  
 SFO2 400.1316005 MHz

F2 - Processing parameters  
 SI 32768  
 SF 100.6126858 MHz  
 WDW EM  
 SSB 0  
 LB 1.00 Hz  
 GB 0  
 PC 1.40

20190401-B12M-4BrStyr 20 mg white solid  $[\text{Et}_3\text{NH}][\text{B}_{12}\text{H}_{10}\text{NHC}(\text{Menthyl})\text{OCH}_2\text{CH}_2\text{C}_6\text{H}_4\text{Br}]$  dissolved in 0.6 mL acetone- $d_6^*$

$^{13}\text{C}$  DEPT NMR 100 MHz

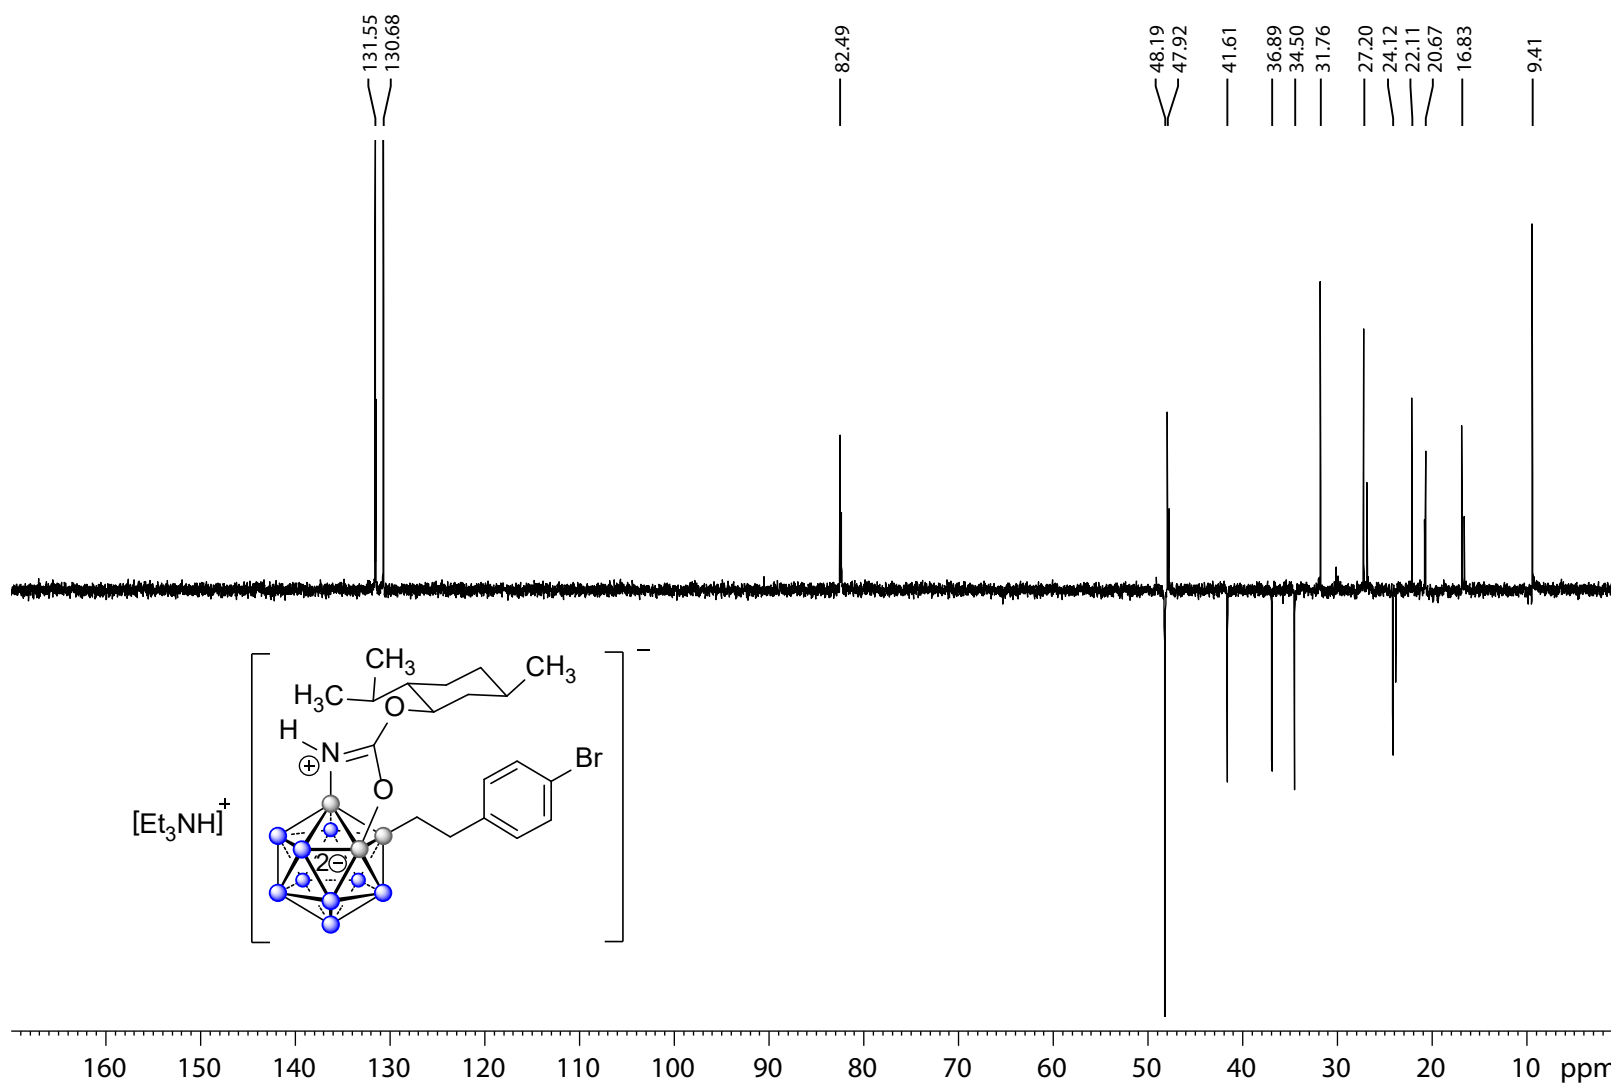

Current Data Parameters  
 NAME 20190401-RV-B12M-4-BrSTYR  
 EXPNO 7  
 PROCNO 1

F2 - Acquisition Parameters  
 Date\_ 20190402  
 Time\_ 20.31  
 INSTRUM spect  
 PROBHD 5 mm PABBO BB/  
 PULPROG dept135  
 TD 65536  
 SOLVENT Acetone  
 NS 256  
 DS 4  
 SWH 29296.875 Hz  
 FIDRES 0.447035 Hz  
 AQ 1.1184810 sec  
 RG 193.34  
 DW 17.067 usec  
 DE 6.50 usec  
 TE 296.6 K  
 CNST2 145.0000000  
 D1 2.00000000 sec  
 D2 0.00344828 sec  
 D12 0.00002000 sec  
 TD0 1

===== CHANNEL f1 =====  
 NUC1 13C  
 P1 10.00 usec  
 P2 20.00 usec  
 PLW1 53.00000000 W  
 SFO1 100.6228293 MHz

===== CHANNEL f2 =====  
 CPDPRG[2] waltz16  
 NUC2 1H  
 P3 15.00 usec  
 P4 30.00 usec  
 PCPD2 80.00 usec  
 PLW2 12.50000000 W  
 PLW12 0.43945000 W  
 SFO2 400.1316005 MHz

F2 - Processing parameters  
 SI 32768  
 SF 100.6126857 MHz  
 WDW EM  
 SSB 0  
 LB 1.00 Hz  
 GB 0  
 PC 4.00

20190401-B12M-4BrStyr 20 mg white solid [Et<sub>3</sub>NH][B<sub>12</sub>H<sub>10</sub>NHC(Menthyl)OCH<sub>2</sub>CH<sub>2</sub>C<sub>6</sub>H<sub>4</sub>Br] dissolved in 0.6 mL acetone-d<sub>6</sub>\*

<sup>1</sup>H - <sup>1</sup>H COSY NMR

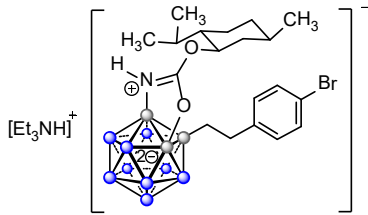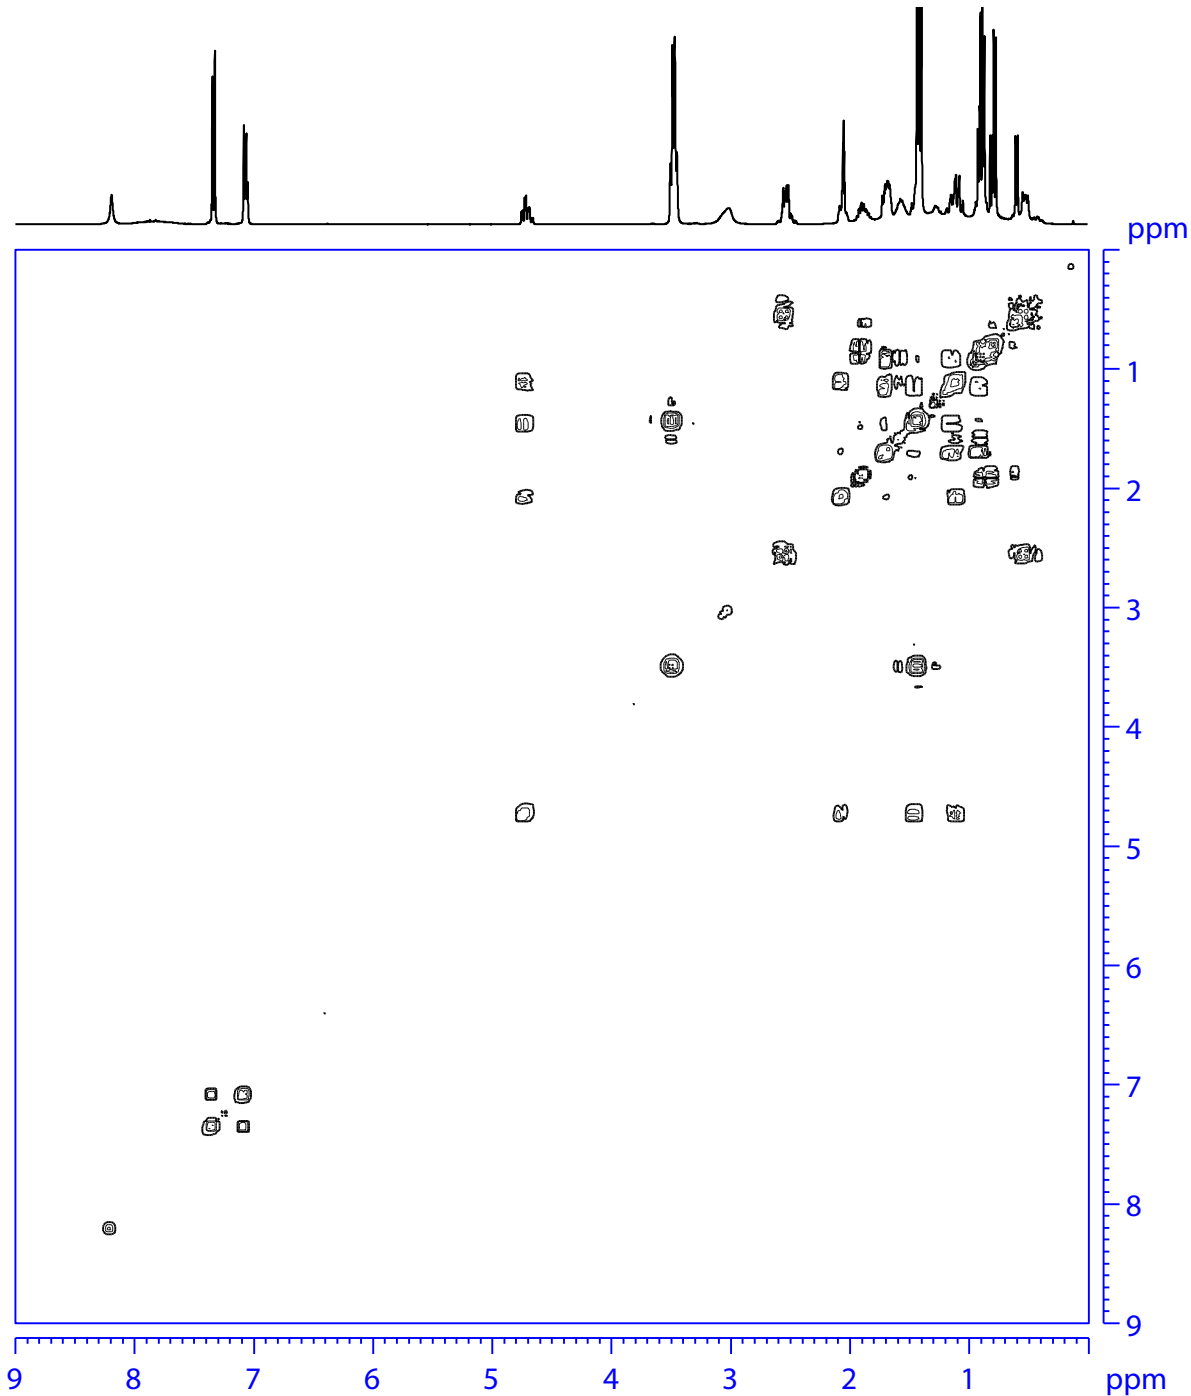

Current Data Parameters  
NAME 20190401-RV-B12M-4-BrSTYR  
EXPNO 8  
PROCNO 1

F2 - Acquisition Parameters  
Date\_ 20190402  
Time\_ 20.32  
INSTRUM spect  
PROBHD 5 mm PABBO BB/  
PULPROG cosygppppqf  
TD 2048  
SOLVENT Acetone  
NS 2  
DS 8  
SWH 5341.880 Hz  
FIDRES 2.608340 Hz  
AQ 0.1916928 sec  
RG 64.43  
DW 93.600 usec  
DE 6.50 usec  
TE 296.4 K  
D0 0.00000300 sec  
D1 2.00000000 sec  
D11 0.03000000 sec  
D12 0.00002000 sec  
D13 0.00000400 sec  
D16 0.00020000 sec  
IN0 0.00018720 sec

==== CHANNEL f1 =====  
NUC1 1H  
P0 15.00 usec  
P1 15.00 usec  
P17 2500.00 usec  
PLW1 12.50000000 W  
PLW10 4.16050005 W  
SFO1 400.1324057 MHz

===== GRADIENT CHANNEL =====  
GPNAM[1] SMSQ10.100  
GPZ1 10.00 %  
P16 1000.00 usec

F1 - Acquisition parameters  
TD 128  
SFO1 400.1324 MHz  
FIDRES 83.466881 Hz  
SW 13.350 ppm  
FnMODE QF

F2 - Processing parameters  
SI 1024  
SF 400.1300000 MHz  
WDW QSINE  
SSB 0  
LB 0 Hz  
GB 0  
PC 1.40

F1 - Processing parameters  
SI 1024  
MC2 QF  
SF 400.1300000 MHz  
WDW QSINE  
SSB 0  
LB 0 Hz  
GB 0

<sup>1</sup>H - <sup>13</sup>C HSQC NMR

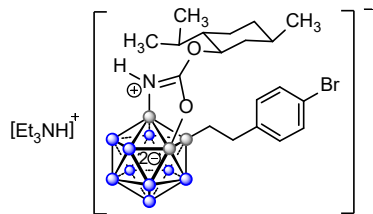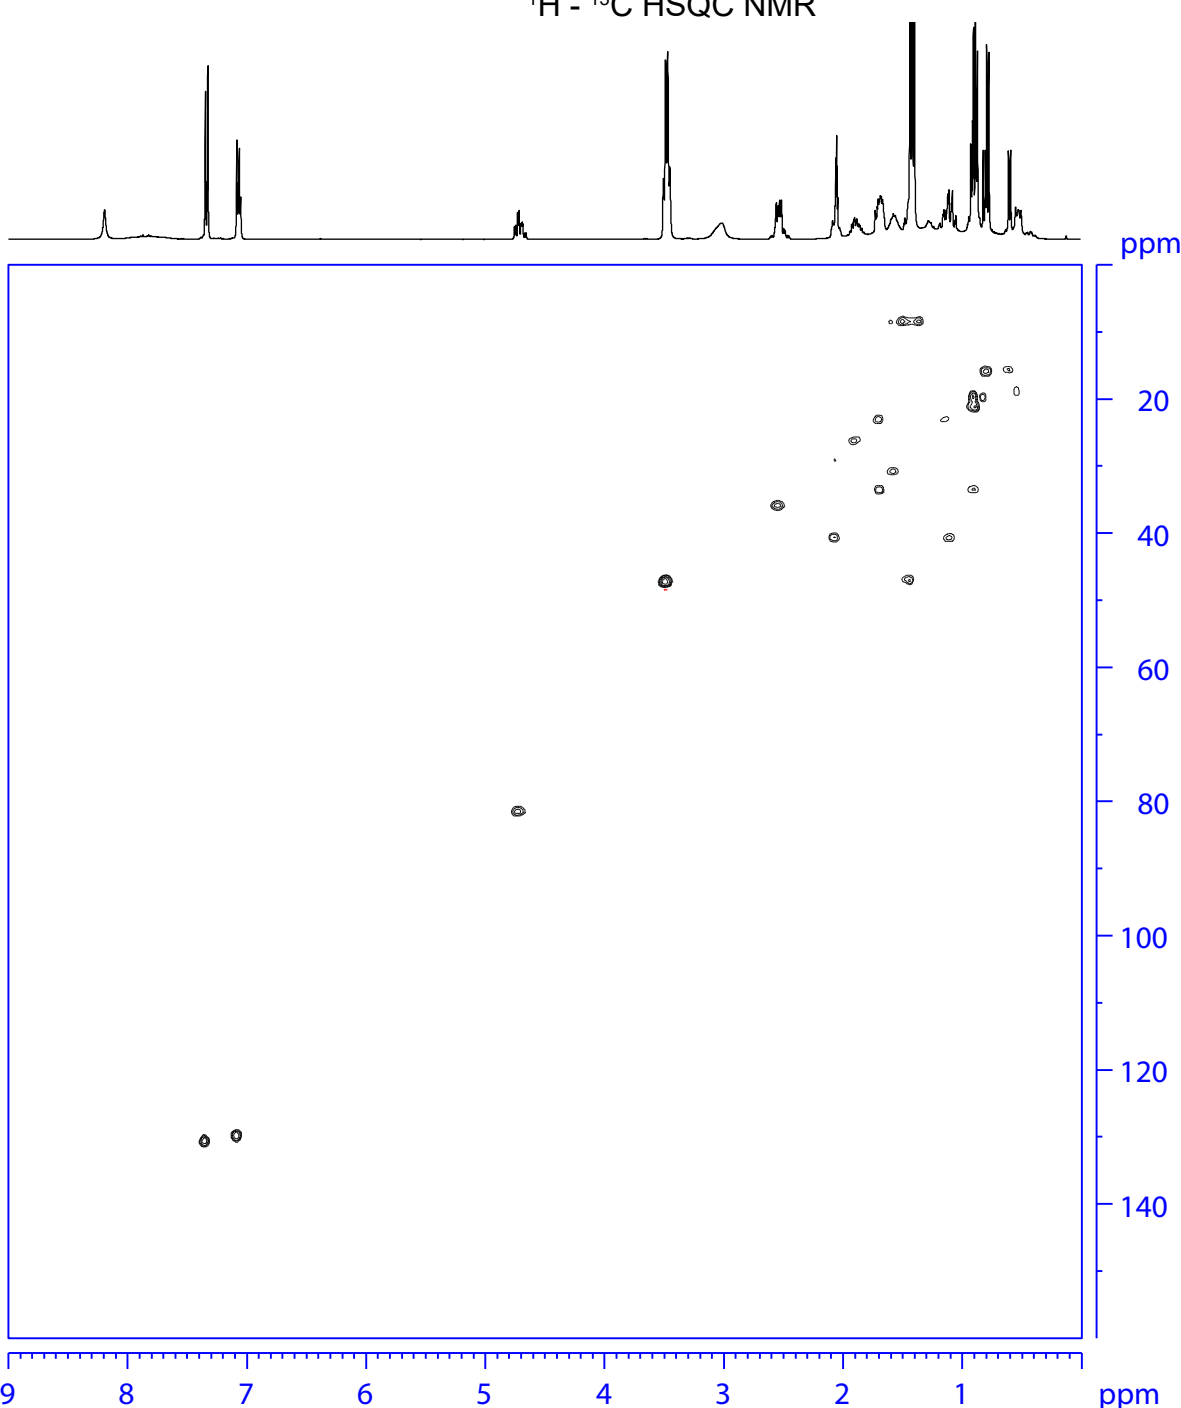

```

Current Data Parameters
NAME      20190401-RV-B12M-4-BrSTYR
EXPNO     9
PROCNO    1

F2 - Acquisition Parameters
Date_     20190402
Time      20.43
INSTRUM   spect
PROBHD    5 mm PABBO BB/
PULPROG   hsqcetgpsi2
TD         1024
SOLVENT    Acetone
NS         2
DS         16
SWH        6009.615 Hz
FIDRES     5.868765 Hz
AQ         0.0851968 sec
RG         193.34
DW         83.200 usec
DE         6.50 usec
TE         296.2 K
CNST2     145.0000000
D0         0.00000300 sec
D1         1.50000000 sec
D4         0.00172414 sec
D11        0.03000000 sec
D16        0.00020000 sec
D24        0.00086207 sec
IN0        0.00001990 sec
ZGOPTNS

===== CHANNEL f1 =====
NUC1       1H
P1         15.00 usec
P2         30.00 usec
P28        1000.00 usec
PLW1       12.5000000 W
SFO1       400.1328009 MHz

===== CHANNEL f2 =====
CPDPRG[2]  garp
NUC2       13C
P3         10.00 usec
P4         20.00 usec
PCPD2     70.00 usec
PLW2       53.0000000 W
PLW12     1.08159995 W
SFO2       100.6238364 MHz

===== GRADIENT CHANNEL =====
GPNAM[1]   SMSQ10.100
GPNAM[2]   SMSQ10.100
GPNAM[3]   SMSQ10.100
GPNAM[4]   SMSQ10.100
GPZ1       80.00 %
GPZ2       20.10 %
GPZ3       11.00 %
GPZ4       -5.00 %
P16        1000.00 usec
P19        600.00 usec

F1 - Acquisition parameters
TD         256
SFO1       100.6238 MHz
FIDRES     196.524048 Hz
SW         249.991 ppm
FnMODE     Echo-Antiecho

F2 - Processing parameters
SI         1024
SF         400.1300000 MHz
WDW        QSINE
SSB        2
LB         0 Hz
GB         0
PC         1.40

F1 - Processing parameters
SI         1024
MC2        echo-antiecho
SF         100.6127690 MHz
WDW        QSINE
SSB        2
LB         0 Hz
GB         0
    
```

20190410-B12M-4OMeStyr 20 mg white solid [Et<sub>3</sub>NH][B<sub>12</sub>H<sub>10</sub>NHC(Menthyl)OCH<sub>2</sub>CH<sub>2</sub>C<sub>6</sub>H<sub>4</sub>OMe] dissolved in 0.6 mL acetone-d<sub>6</sub>\*

400MHz <sup>1</sup>H NMR, ○ deuterated solvent residual peak= 2.05 ppm; ◇ water peak

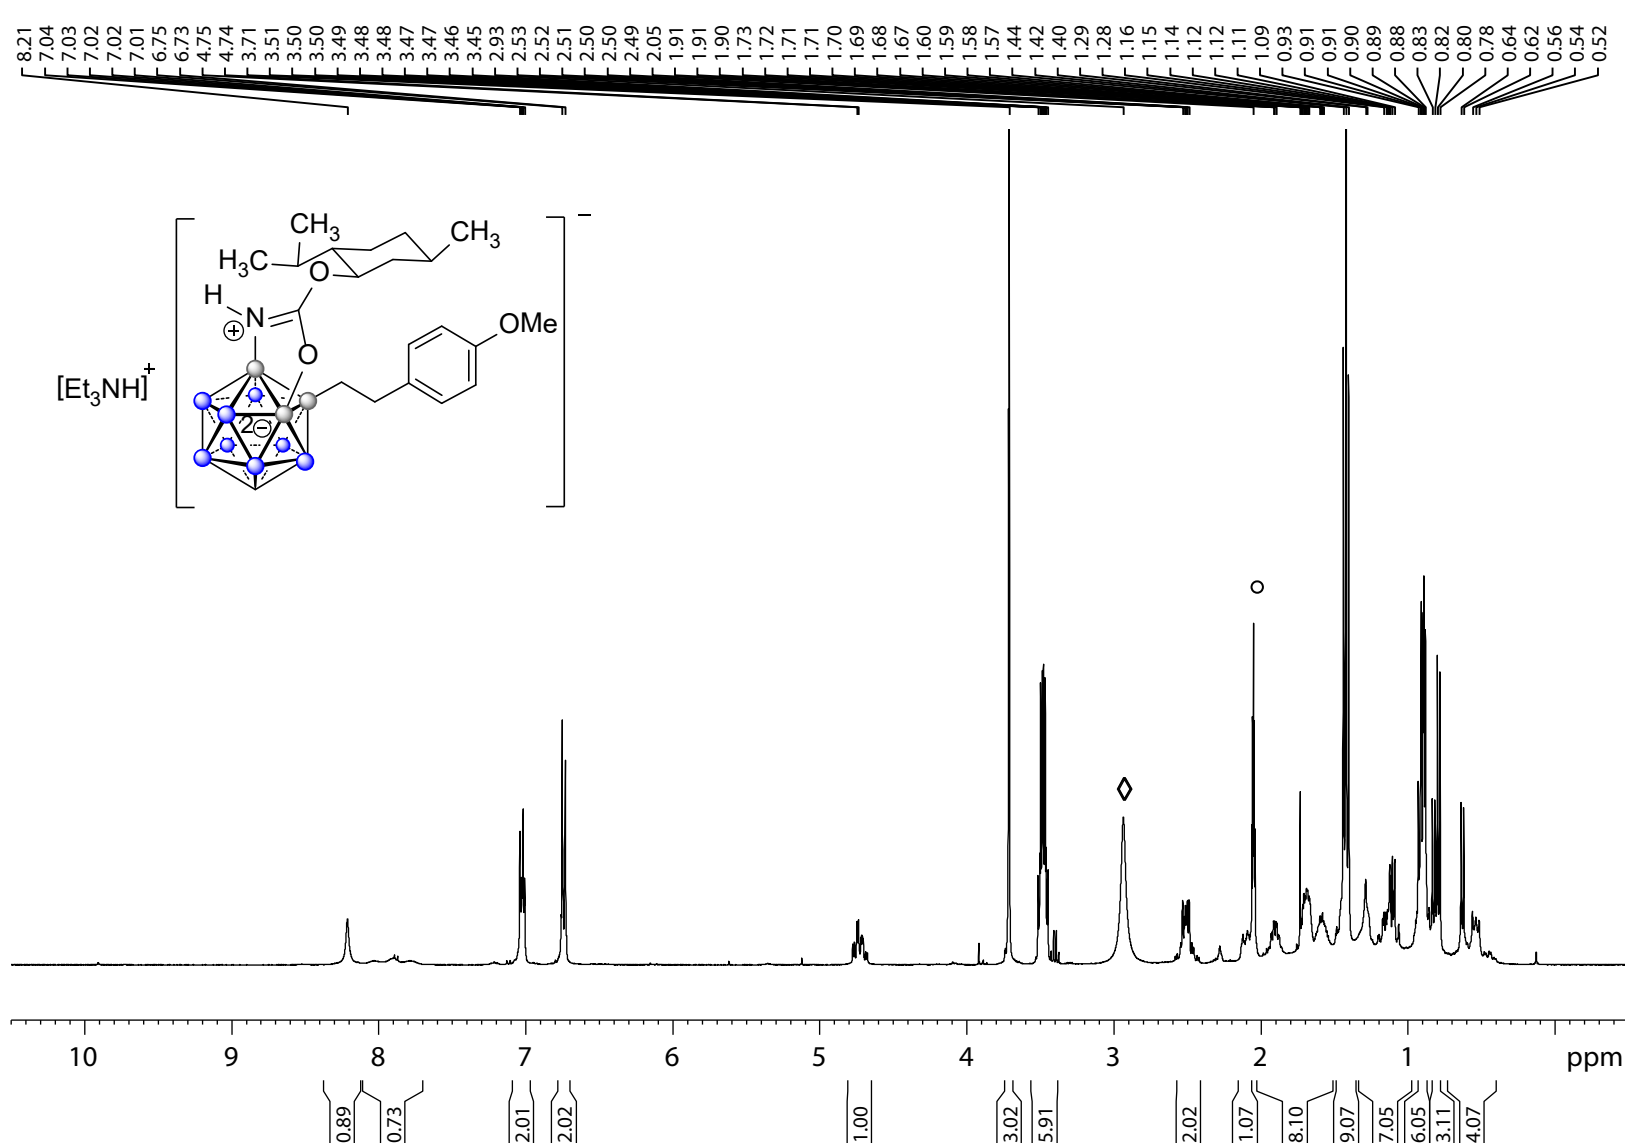

Current Data Parameters  
 NAME 20190410-RV-B12M-4OMe-Styr  
 EXPNO 1  
 PROCNO 1

F2 - Acquisition Parameters  
 Date 20190411  
 Time 17.57  
 INSTRUM spect  
 PROBHD 5 mm PABBO BB/  
 PULPROG zg30  
 TD 65536  
 SOLVENT Acetone  
 NS 16  
 DS 2  
 SWH 10000.000 Hz  
 FIDRES 0.152588 Hz  
 AQ 3.2767999 sec  
 RG 95.29  
 DW 50.000 usec  
 DE 6.50 usec  
 TE 297.6 K  
 D1 1.00000000 sec  
 TDO 1

==== CHANNEL f1 =====  
 NUC1 1H  
 P1 15.00 usec  
 PLW1 12.5000000 W  
 SFO1 400.1328009 MHz

F2 - Processing parameters  
 SI 65536  
 SF 400.1300069 MHz  
 WDW EM  
 SSB 0  
 LB 0.30 Hz  
 GB 0  
 PC 1.00



20190410-B12M-4OMeStyr 20 mg white solid [Et<sub>3</sub>NH][B<sub>12</sub>H<sub>10</sub>NHC(Menthyl)OCH<sub>2</sub>CH<sub>2</sub>C<sub>6</sub>H<sub>4</sub>OMe] dissolved in 0.6 mL acetone-d<sub>6</sub>\*

400MHz <sup>1</sup>H{B} NMR, ◊ deuterated solvent residual peak= 2.05 ppm; ◇ water peak

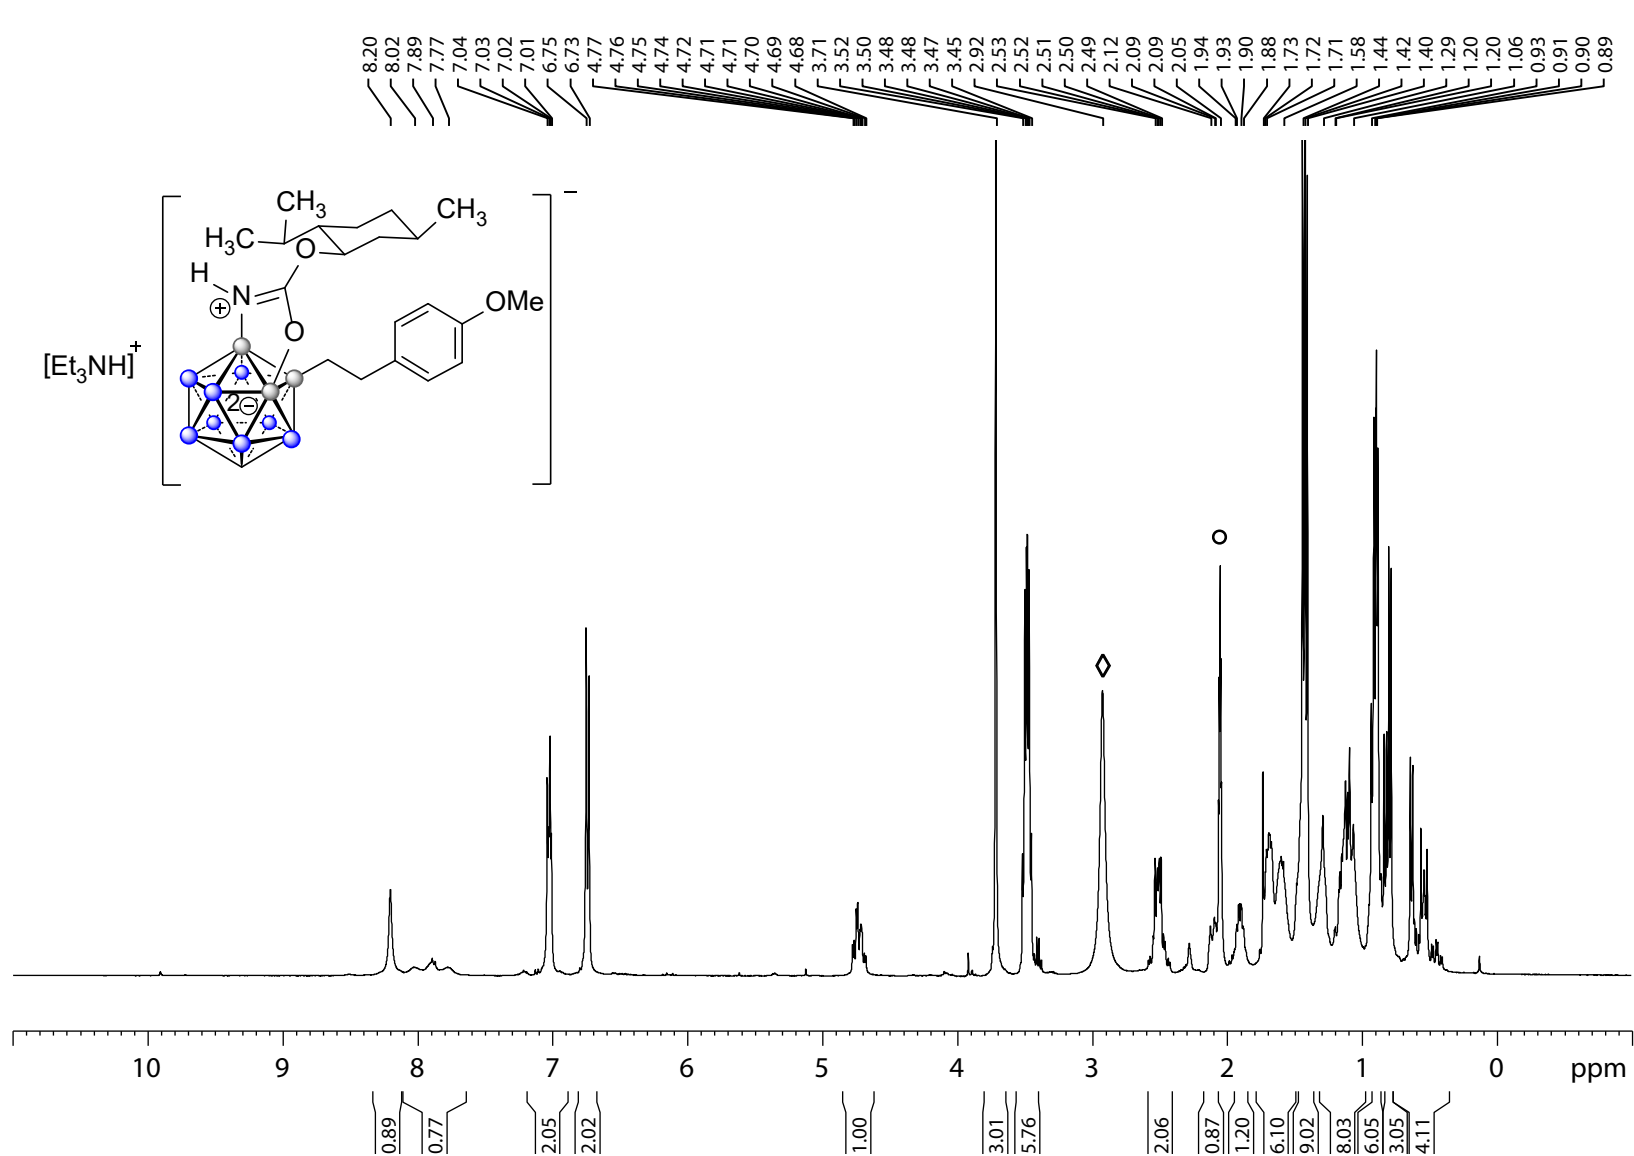

Current Data Parameters  
 NAME 20190410-RV-B12M-4OMe-Styr  
 EXPNO 2  
 PROCNO 1

F2 - Acquisition Parameters  
 Date\_ 20190411  
 Time\_ 17.58  
 INSTRUM spect  
 PROBHD 5 mm PABBO BB/  
 PULPROG zgig30  
 TD 16384  
 SOLVENT Acetone  
 NS 16  
 DS 4  
 SWH 8012.820 Hz  
 FIDRES 0.489064 Hz  
 AQ 1.0223616 sec  
 RG 107.6  
 DW 62.400 usec  
 DE 6.50 usec  
 TE 297.8 K  
 D1 1.00000000 sec  
 D11 0.03000000 sec  
 TD0 1

===== CHANNEL f1 =====  
 NUC1 1H  
 P1 15.00 usec  
 PLW1 12.50000000 W  
 SFO1 400.1320007 MHz

===== CHANNEL f2 =====  
 CPDPRG[2] garp4  
 NUC2 11B  
 PCPD2 90.00 usec  
 PLW2 52.96599960 W  
 PLW12 0.64477998 W  
 SFO2 128.3776050 MHz

F2 - Processing parameters  
 SI 32768  
 SF 400.1300070 MHz  
 WDW EM  
 SSB 0  
 LB 1.00 Hz  
 GB 0  
 PC 1.40

20190410-B12M-4OMeStyr 20 mg white solid [Et<sub>3</sub>NH][B<sub>12</sub>H<sub>10</sub>NHC(Menthyl)OCH<sub>2</sub>CH<sub>2</sub>C<sub>6</sub>H<sub>4</sub>OMe] dissolved in 0.6 mL acetone-d<sub>6</sub>\*

<sup>11</sup>B NMR 128MHz

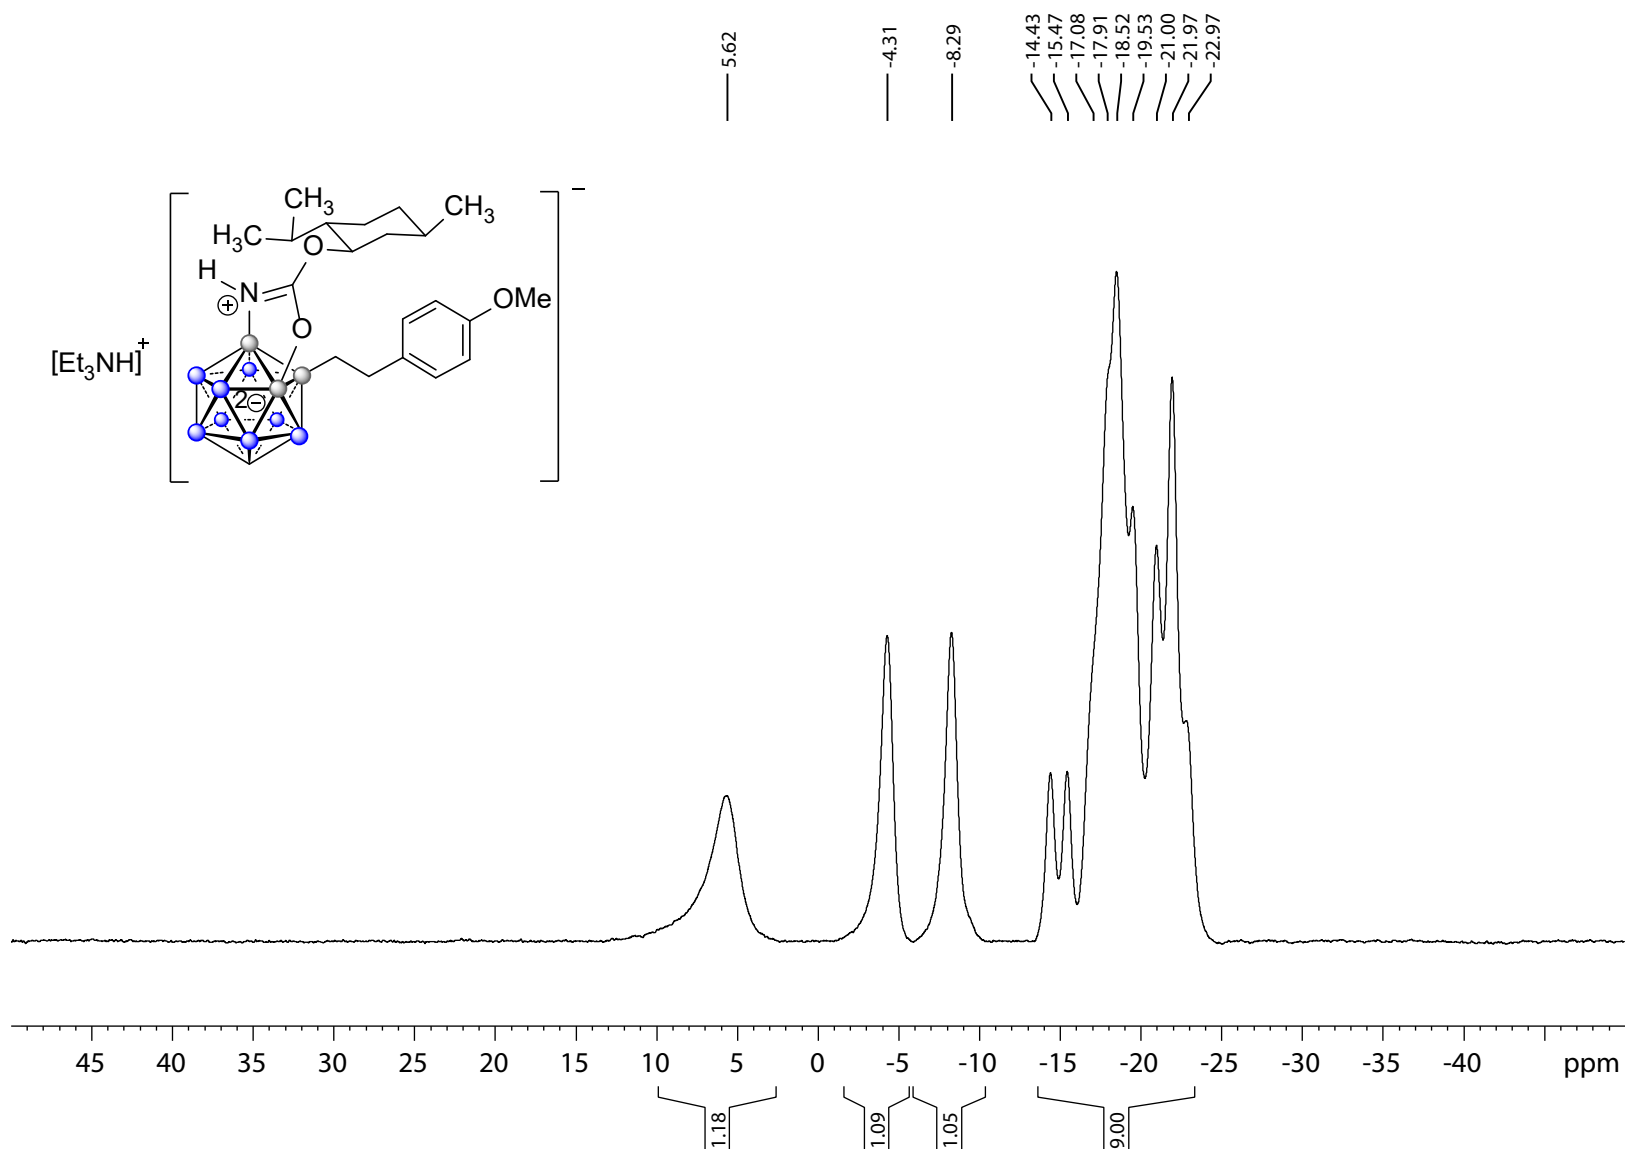

Current Data Parameters  
NAME 20190410-RV-B12M-4OMe-Styr  
EXPNO 3  
PROCNO 1

F2 - Acquisition Parameters  
Date\_ 20190411  
Time\_ 18.04  
INSTRUM spect  
PROBHD 5 mm PABBO BB/  
PULPROG zg  
TD 65536  
SOLVENT Acetone  
NS 128  
DS 4  
SWH 25510.203 Hz  
FIDRES 0.389255 Hz  
AQ 1.2845056 sec  
RG 193.34  
DW 19.600 usec  
DE 6.50 usec  
TE 297.5 K  
D1 1.0000000 sec  
TD0 1

==== CHANNEL f1 =====  
NUC1 11B  
P1 9.93 usec  
PLW1 52.96599960 W  
SFO1 128.3776052 MHz

F2 - Processing parameters  
SI 32768  
SF 128.3776050 MHz  
WDW EM  
SSB 0  
LB 10.00 Hz  
GB 0  
PC 1.40

20190410-B12M-4OMeStyr 20 mg white solid [Et<sub>3</sub>NH][B<sub>12</sub>H<sub>10</sub>NHC(Menthyl)OCH<sub>2</sub>CH<sub>2</sub>C<sub>6</sub>H<sub>4</sub>OMe] dissolved in 0.6 mL acetone-d<sub>6</sub>\*

<sup>11</sup>B{<sup>1</sup>H} NMR 128MHz

Current Data Parameters  
NAME 20190410-RV-B12M-4OMe-Styr  
EXPNO 4  
PROCNO 1

F2 - Acquisition Parameters  
Date\_ 20190411  
Time\_ 18.10  
INSTRUM spect  
PROBHD 5 mm PABBO BB/  
PULPROG zgpg30  
TD 65536  
SOLVENT Acetone  
NS 128  
DS 4  
SWH 25510.203 Hz  
FIDRES 0.389255 Hz  
AQ 1.2845056 sec  
RG 193.34  
DW 19.600 usec  
DE 6.50 usec  
TE 298.2 K  
D1 1.00000000 sec  
D11 0.03000000 sec  
TD0 1

===== CHANNEL f1 =====  
NUC1 11B  
P1 9.93 usec  
PLW1 52.96599960 W  
SFO1 128.3776050 MHz

===== CHANNEL f2 =====  
CPDPRG[2] waltz16  
NUC2 1H  
PCPD2 80.00 usec  
PLW2 12.50000000 W  
PLW12 0.43945000 W  
PLW13 0.28125000 W  
SFO2 400.1320007 MHz

F2 - Processing parameters  
SI 32768  
SF 128.3776050 MHz  
WDW EM  
SSB 0  
LB 10.00 Hz  
GB 0  
PC 1.40

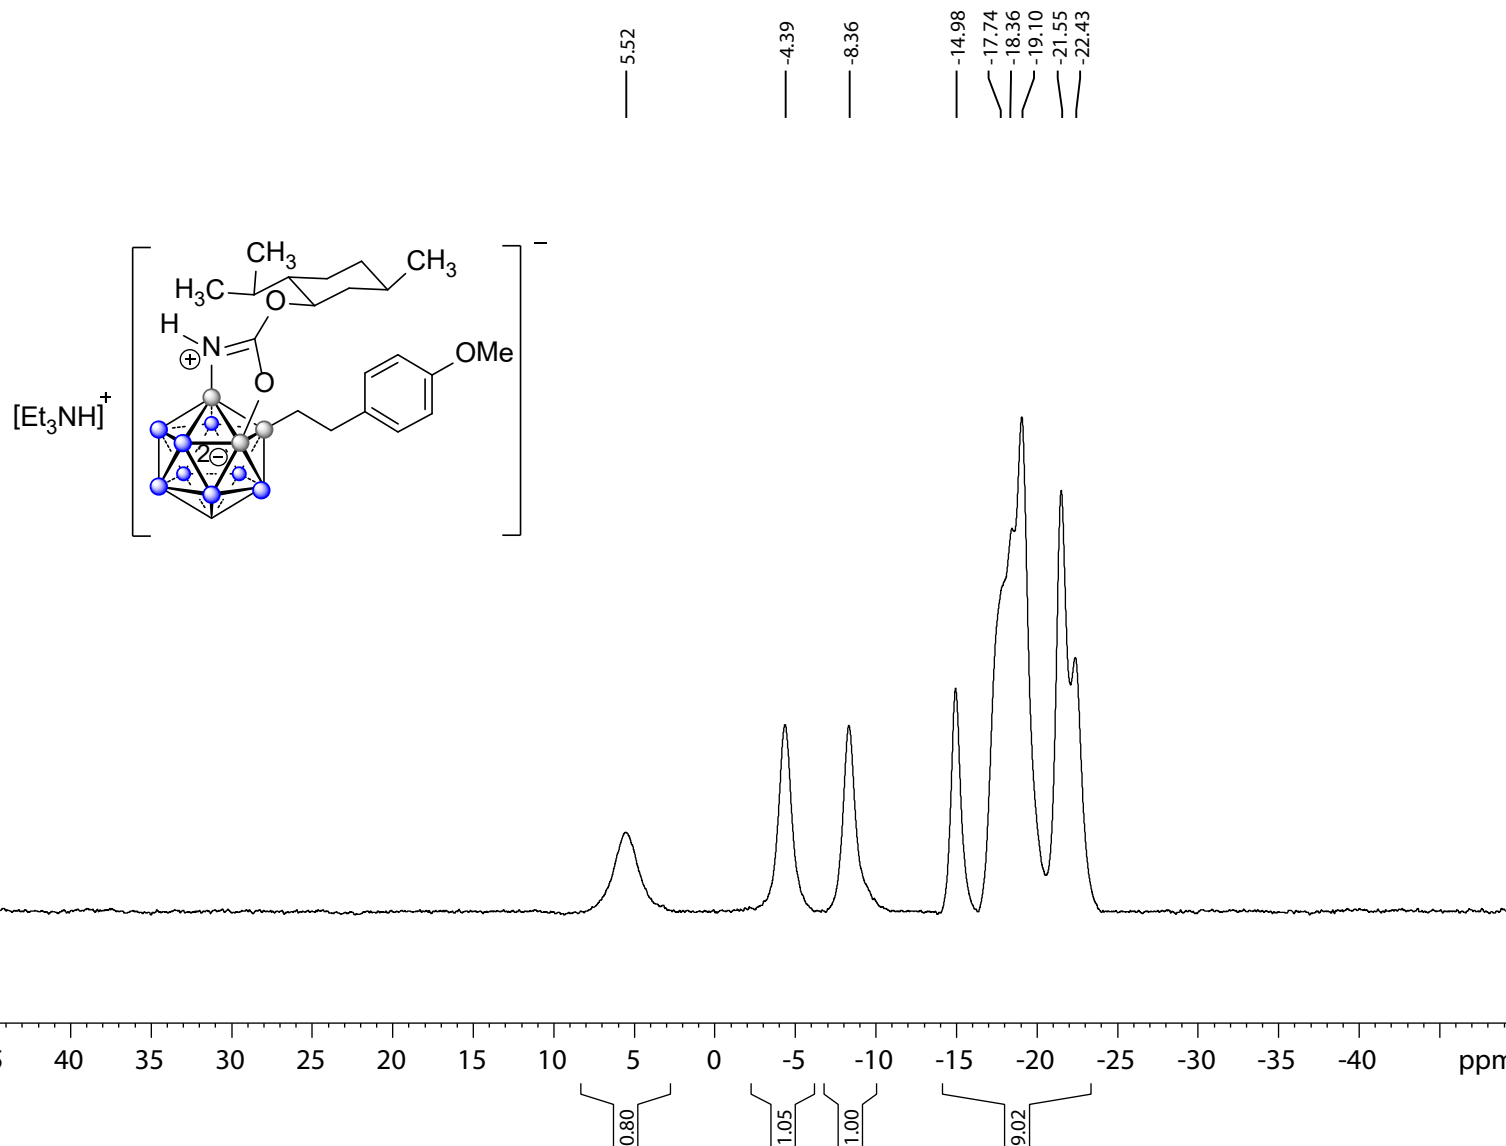

20190410-B12M-4OMeStyr 20 mg white solid [Et<sub>3</sub>NH][B<sub>12</sub>H<sub>10</sub>NHC(Menthyl)OCH<sub>2</sub>CH<sub>2</sub>C<sub>6</sub>H<sub>4</sub>OMe] dissolved in 0.6 mL acetone-d<sub>6</sub>\*

<sup>13</sup>C{<sup>1</sup>H} NMR 100 MHz

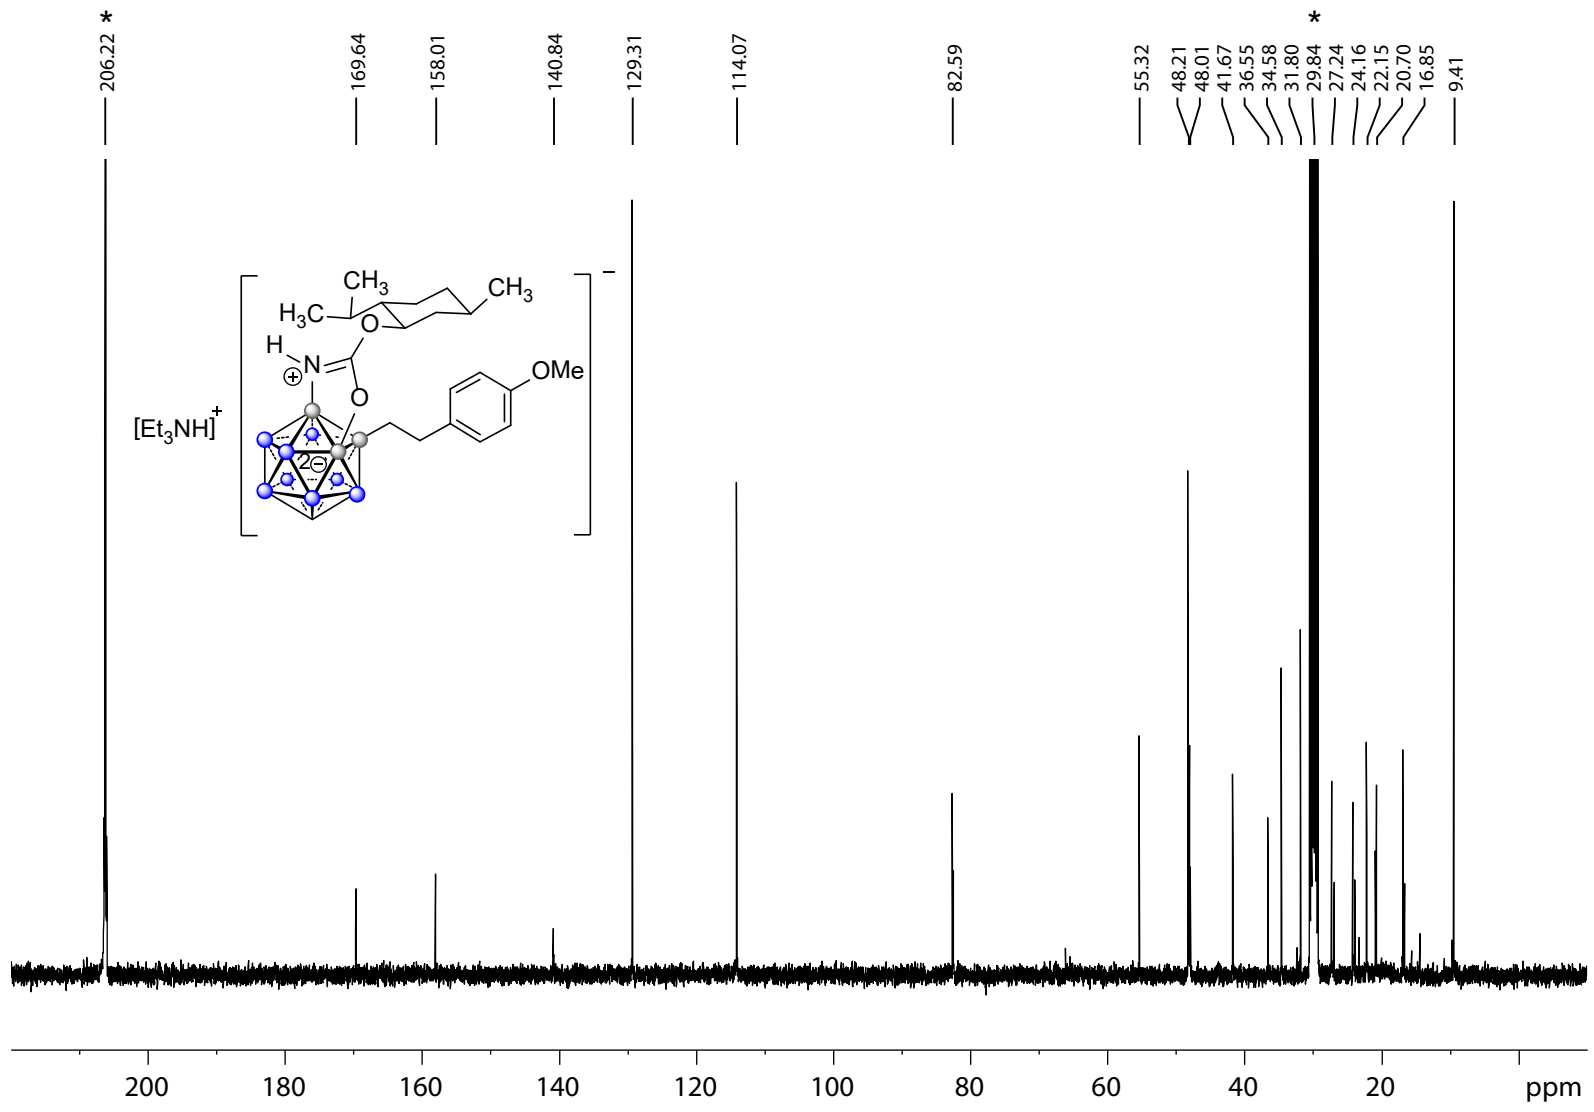

Current Data Parameters  
 NAME 20190410-RV-B12M-4OME-Styr  
 EXPNO 5  
 PROCNO 1

F2 - Acquisition Parameters  
 Date\_ 20190411  
 Time 19.43  
 INSTRUM spect  
 PROBHD 5 mm PABBO BB/  
 PULPROG zgpg30  
 TD 65536  
 SOLVENT Acetone  
 NS 2048  
 DS 4  
 SWH 29761.904 Hz  
 FIDRES 0.454131 Hz  
 AQ 1.1010048 sec  
 RG 193.34  
 DW 16.800 usec  
 DE 6.50 usec  
 TE 298.4 K  
 D1 1.50000000 sec  
 D11 0.03000000 sec  
 TDO 1

===== CHANNEL f1 =====  
 NUC1 13C  
 P1 10.00 usec  
 PLW1 53.00000000 W  
 SFO1 100.6228293 MHz

===== CHANNEL f2 =====  
 CPDPRG[2] waltz16  
 NUC2 1H  
 PCPD2 80.00 usec  
 PLW2 12.50000000 W  
 PLW12 0.43945000 W  
 PLW13 0.28125000 W  
 SFO2 400.1316005 MHz

F2 - Processing parameters  
 SI 32768  
 SF 100.6126813 MHz  
 WDW EM  
 SSB 0  
 LB 1.00 Hz  
 GB 0  
 PC 1.40

20190410-B12M-4OMeStyr 20 mg white solid [Et<sub>3</sub>NH][B<sub>12</sub>H<sub>10</sub>NHC(Menthyl)OCH<sub>2</sub>CH<sub>2</sub>C<sub>6</sub>H<sub>4</sub>OMe] dissolved in 0.6 mL acetone-d<sub>6</sub>\*

<sup>13</sup>C DEPT NMR 100 MHz

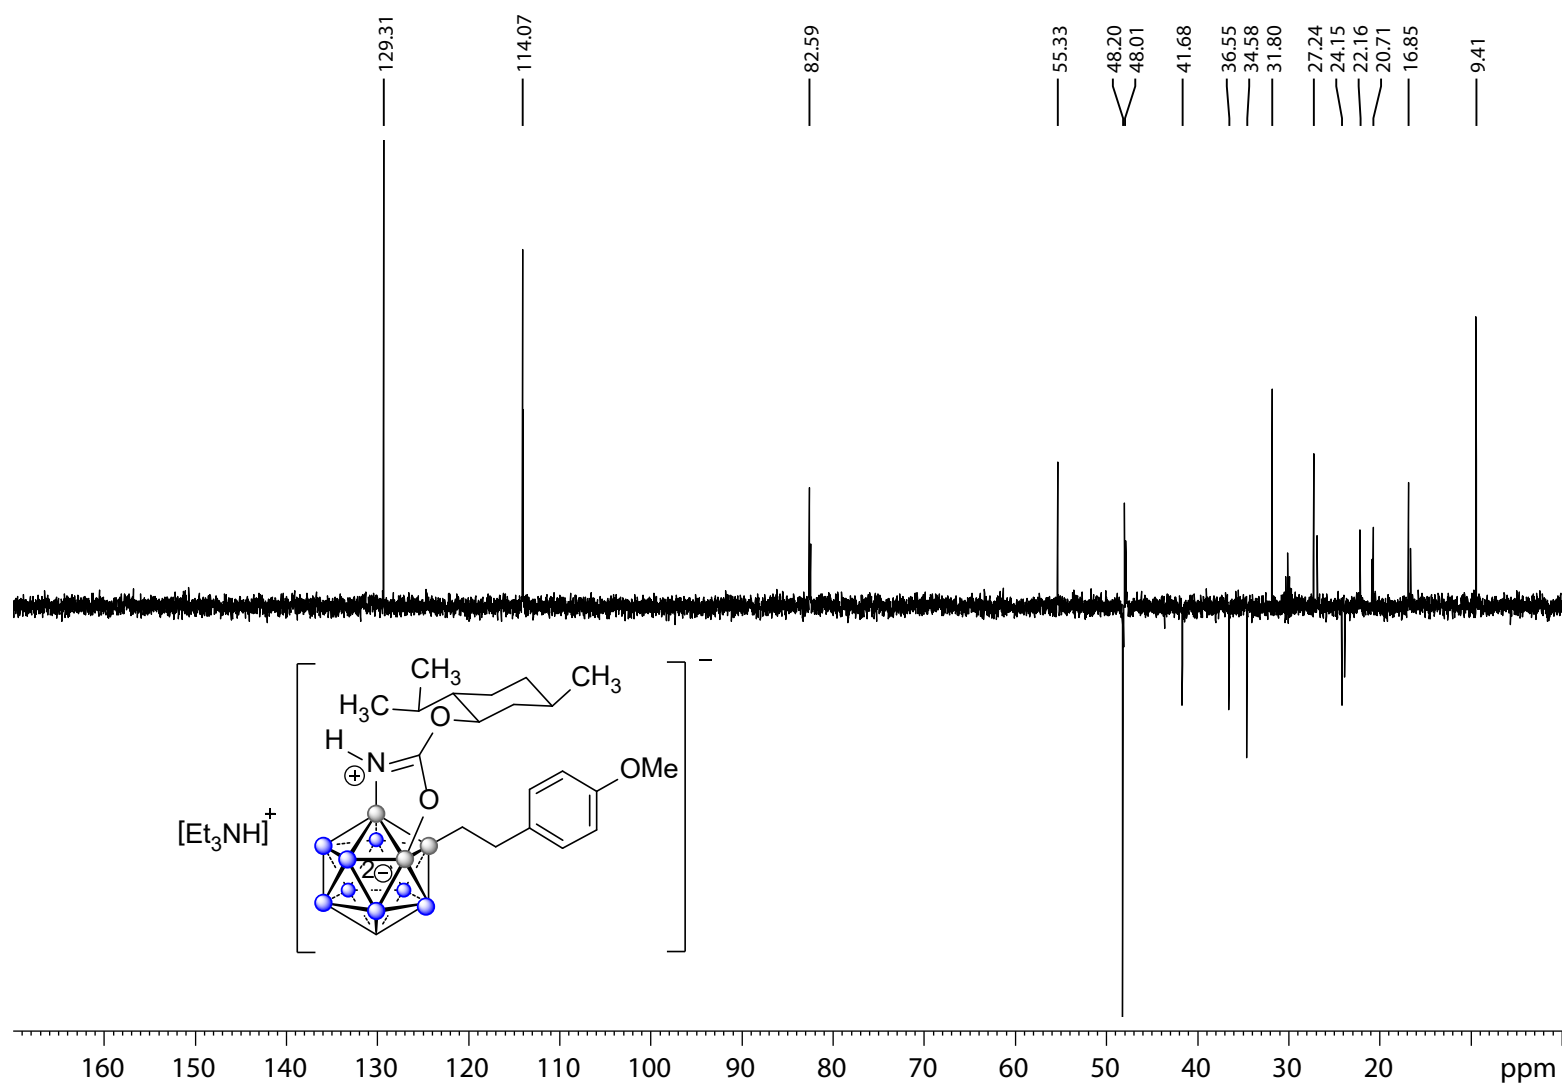

Current Data Parameters  
 NAME 20190410-RV-B12M-4OMe-Styr  
 EXPNO 6  
 PROCNO 1

F2 - Acquisition Parameters  
 Date\_ 20190411  
 Time\_ 19.57  
 INSTRUM spect  
 PROBHD 5 mm PABBO BB/  
 PULPROG dept135  
 TD 65536  
 SOLVENT Acetone  
 NS 256  
 DS 4  
 SWH 29296.875 Hz  
 FIDRES 0.447035 Hz  
 AQ 1.1184810 sec  
 RG 193.34  
 DW 17.067 usec  
 DE 6.50 usec  
 TE 297.9 K  
 CNST2 145.0000000  
 D1 2.00000000 sec  
 D2 0.00344828 sec  
 D12 0.00002000 sec  
 TD0 1

==== CHANNEL f1 =====  
 NUC1 13C  
 P1 10.00 usec  
 P2 20.00 usec  
 PLW1 53.00000000 W  
 SFO1 100.6228293 MHz

==== CHANNEL f2 =====  
 CPDPRG[2] waltz16  
 NUC2 1H  
 P3 15.00 usec  
 P4 30.00 usec  
 PCPD2 80.00 usec  
 PLW2 12.50000000 W  
 PLW12 0.43945000 W  
 SFO2 400.1316005 MHz

F2 - Processing parameters  
 SI 32768  
 SF 100.6126811 MHz  
 WDW EM  
 SSB 0  
 LB 1.00 Hz  
 GB 0  
 PC 4.00

<sup>1</sup>H - <sup>1</sup>H COSY NMR

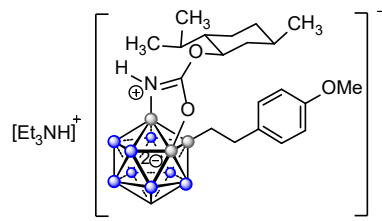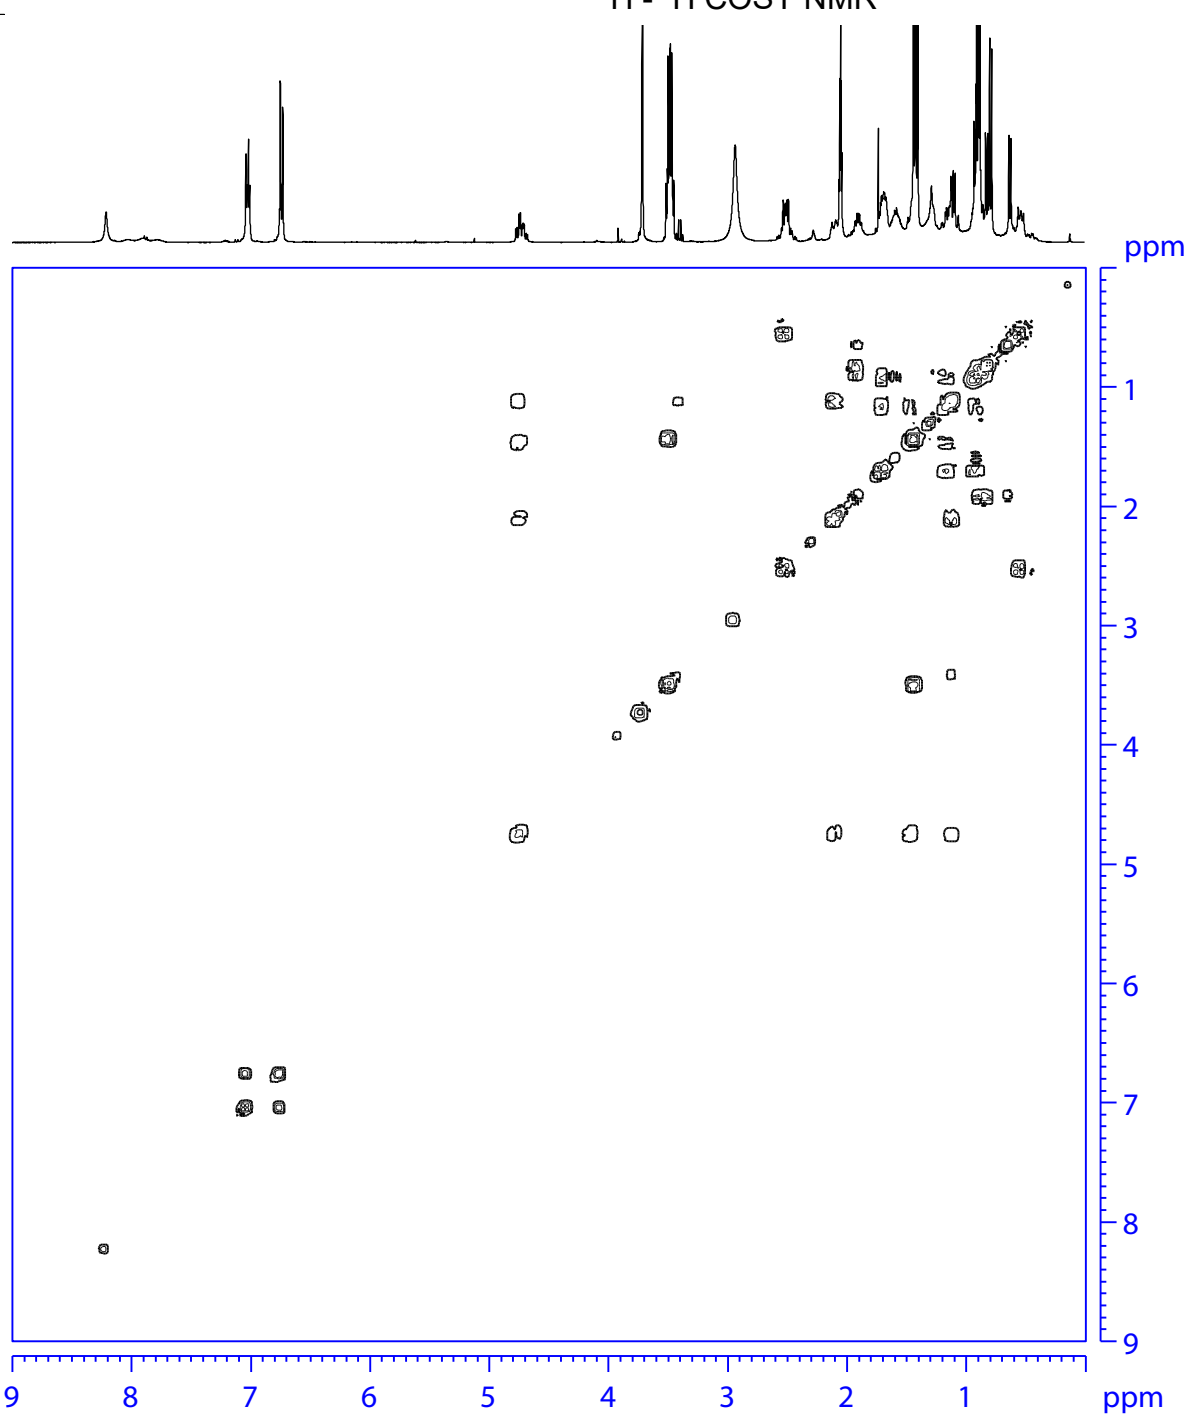

Current Data Parameters  
 NAME 20190410-RV-B12M-4OME-Styr  
 EXPNO 8  
 PROCNO 1

F2 - Acquisition Parameters  
 Date\_ 20190411  
 Time\_ 20.14  
 INSTRUM spect  
 PROBHD 5 mm PABBO BB/  
 PULPROG cosygpppqf  
 TD 2048  
 SOLVENT Acetone  
 NS 2  
 DS 8  
 SWH 5341.880 Hz  
 FIDRES 2.608340 Hz  
 AQ 0.1916928 sec  
 RG 170.36  
 DW 93.600 usec  
 DE 6.50 usec  
 TE 297.5 K  
 D0 0.0000300 sec  
 D1 2.0000000 sec  
 D11 0.0300000 sec  
 D12 0.0000200 sec  
 D13 0.0000040 sec  
 D16 0.0002000 sec  
 INO 0.00018720 sec

===== CHANNEL f1 =====  
 NUC1 1H  
 P0 15.00 usec  
 P1 15.00 usec  
 P17 2500.00 usec  
 PLW1 12.5000000 W  
 PLW10 4.16050005 W  
 SFO1 400.1324057 MHz

===== GRADIENT CHANNEL =====  
 GPNAM[1] SMSQ10.100  
 GPZ1 10.00 %  
 P16 1000.00 usec

F1 - Acquisition parameters  
 TD 128  
 SFO1 400.1324 MHz  
 FIDRES 83.466881 Hz  
 SW 13.350 ppm  
 FnmODE QF

F2 - Processing parameters  
 SI 1024  
 SF 400.1300000 MHz  
 WDW QSINE  
 SSB 0  
 LB 0 Hz  
 GB 0  
 PC 1.40

F1 - Processing parameters  
 SI 1024  
 MC2 QF  
 SF 400.1300000 MHz  
 WDW QSINE  
 SSB 0  
 LB 0 Hz  
 GB 0

<sup>1</sup>H - <sup>13</sup>C HSQC NMR

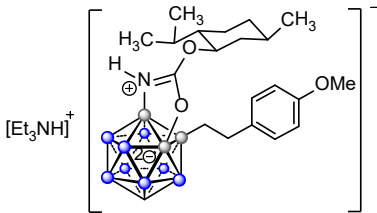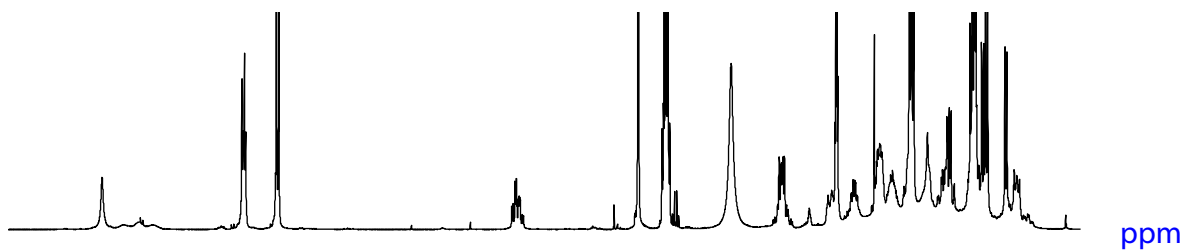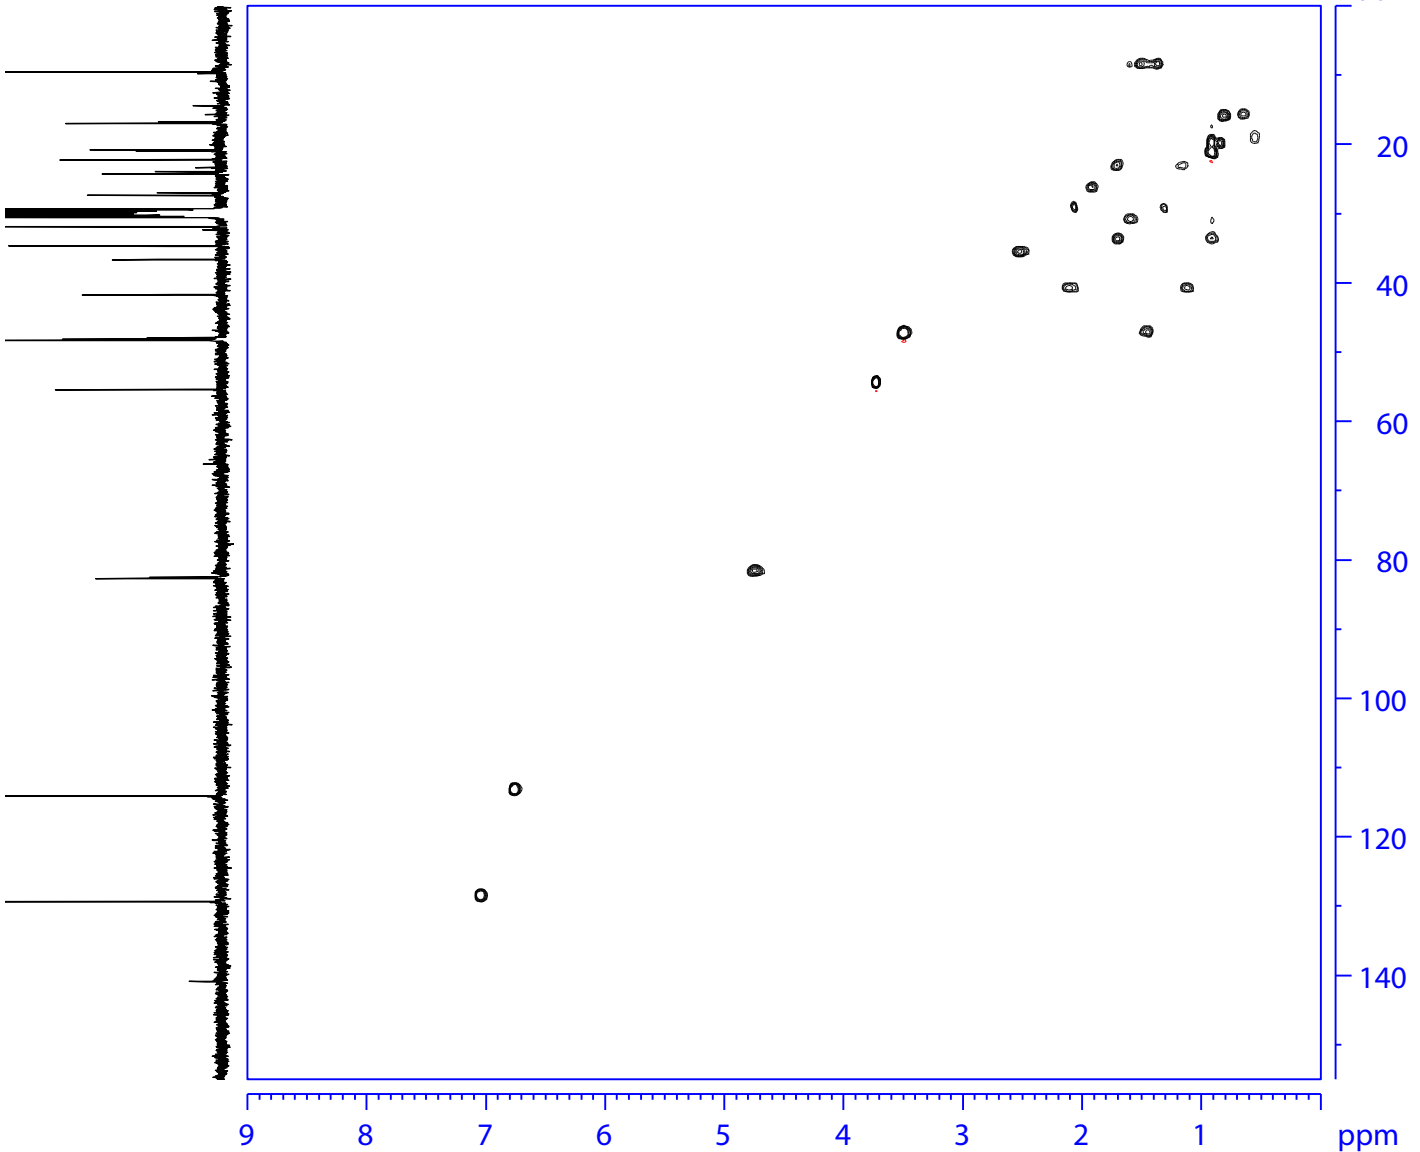

```

Current Data Parameters
NAME      20190410-RV-B12M-4OME-Styr
EXPNO    7
PROCNO    1

F2 - Acquisition Parameters
Date_    20190411
Time     19.59
INSTRUM  spect
PROBHD   5 mm PABBO BB/
PULPROG  hsqcetgpsi2
TD       1024
SOLVENT  Acetone
NS       2
DS       16
SWH      6009.615 Hz
FIDRES   5.868765 Hz
AQ       0.0851968 sec
RG       193.34
DW       83.200 usec
DE       6.50 usec
TE       297.6 K
CNST2    145.0000000
D0       0.00000300 sec
D1       1.50000000 sec
D4       0.00172414 sec
D11      0.03000000 sec
D16      0.00020000 sec
D24      0.00086207 sec
IN0      0.00001990 sec
ZGOPTNS

===== CHANNEL f1 =====
NUC1     1H
F1       15.00 usec
P2       30.00 usec
P28      1000.00 usec
PLW1     12.50000000 W
SFO1     400.1328009 MHz

===== CHANNEL f2 =====
CPDPRG[2]  garp
NUC2     13C
F2       10.00 usec
P4       20.00 usec
PCPD2    70.00 usec
PLW2     53.00000000 W
PLW12    1.08159995 W
SFO2     100.6238364 MHz

===== GRADIENT CHANNEL =====
GPNAM[1]  SMSQ10.100
GPNAM[2]  SMSQ10.100
GPNAM[3]  SMSQ10.100
GPNAM[4]  SMSQ10.100
GPZ1     80.00 %
GPZ2     20.10 %
GPZ3     11.00 %
GPZ4     -5.00 %
P16      1000.00 usec
P19      600.00 usec

F1 - Acquisition parameters
TD       256
SFO1     100.6238 MHz
FIDRES   196.524048 Hz
SW       249.991 ppm
FnMODE   Echo-Antiecho

F2 - Processing parameters
SI       1024
SF       400.1300000 MHz
WDW      QSINE
SSB      2
LB       0 Hz
GB       0
PC       1.40

F1 - Processing parameters
SI       1024
MC2     echo-antiecho
SF       100.6127690 MHz
WDW      QSINE
SSB      2
LB       0 Hz
GB       0
    
```

20190420-B12M-4COONO2Styr 20 mg white solid  $[\text{Et}_3\text{NH}][\text{B}_{12}\text{H}_{10}\text{NHC}(\text{Menthyl})\text{OCH}_2\text{CH}_2\text{C}_6\text{H}_4\text{NO}_2]$  dissolved in 0.6 mL acetone- $d_6$ \*

400MHz  $^1\text{H}$  NMR,  $\circ$  deuterated solvent residual peak= 2.05 ppm;  $\diamond$  water peak

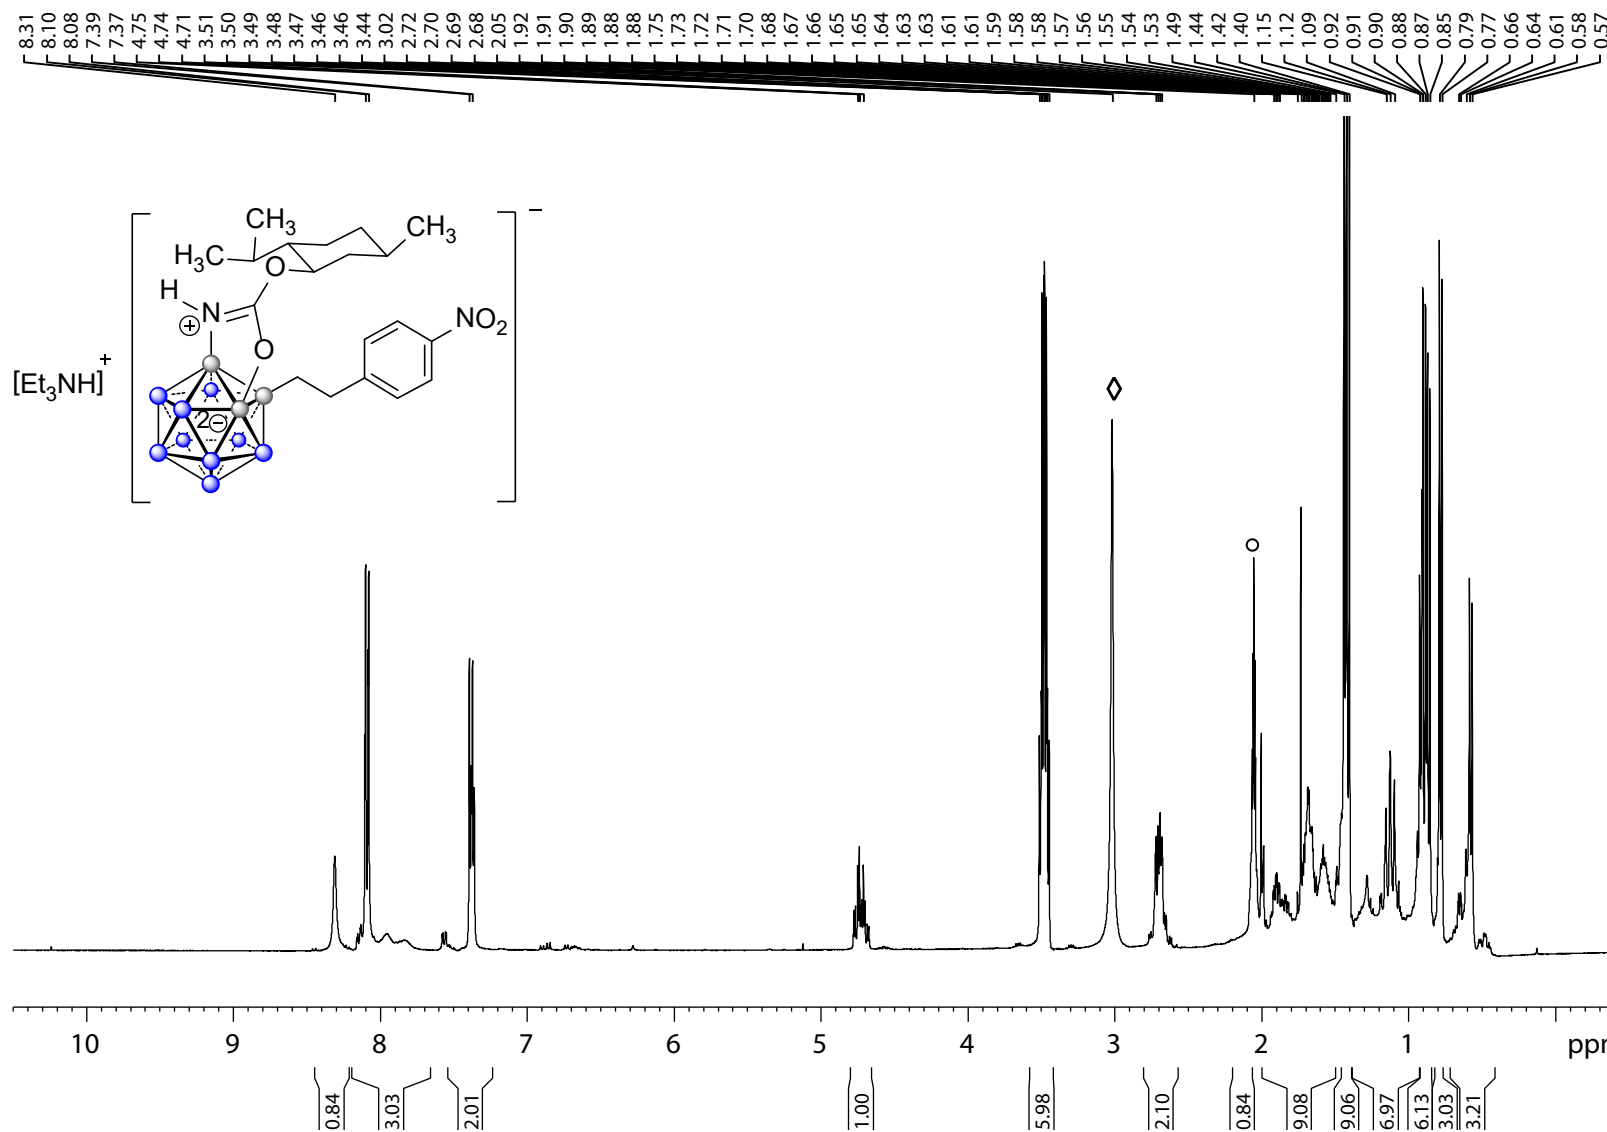

Current Data Parameters  
 NAME 20190420-RD-B12M-4NO2-STYR  
 EXPNO 1  
 PROCNO 1

F2 - Acquisition Parameters  
 Date\_ 20190421  
 Time\_ 14.19  
 INSTRUM spect  
 PROBHD 5 mm PABBO BB/  
 PULPROG zg30  
 TD 65536  
 SOLVENT Acetone  
 NS 16  
 DS 2  
 SWH 10000.000 Hz  
 FIDRES 0.152588 Hz  
 AQ 3.2767999 sec  
 RG 71.39  
 DW 50.000 usec  
 DE 6.50 usec  
 TE 296.1 K  
 D1 1.00000000 sec  
 TD0 1

===== CHANNEL f1 =====  
 NUC1 1H  
 P1 15.00 usec  
 PLW1 12.5000000 W  
 SFO1 400.1328009 MHz

F2 - Processing parameters  
 SI 65536  
 SF 400.1300070 MHz  
 WDW EM  
 SSB 0  
 LB 0.30 Hz  
 GB 0  
 PC 1.00



20190420-B12M-4COONO2Styr 20 mg white solid  $[\text{Et}_3\text{NH}][\text{B}_{12}\text{H}_{10}\text{NHC}(\text{Menthyl})\text{OCH}_2\text{CH}_2\text{C}_6\text{H}_4\text{NO}_2]$  dissolved in 0.6 mL acetone- $d_6^*$

400MHz  $^1\text{H}\{\text{B}\}$  NMR,  $\circ$  deuterated solvent residual peak = 2.05 ppm;  $\diamond$  water peak

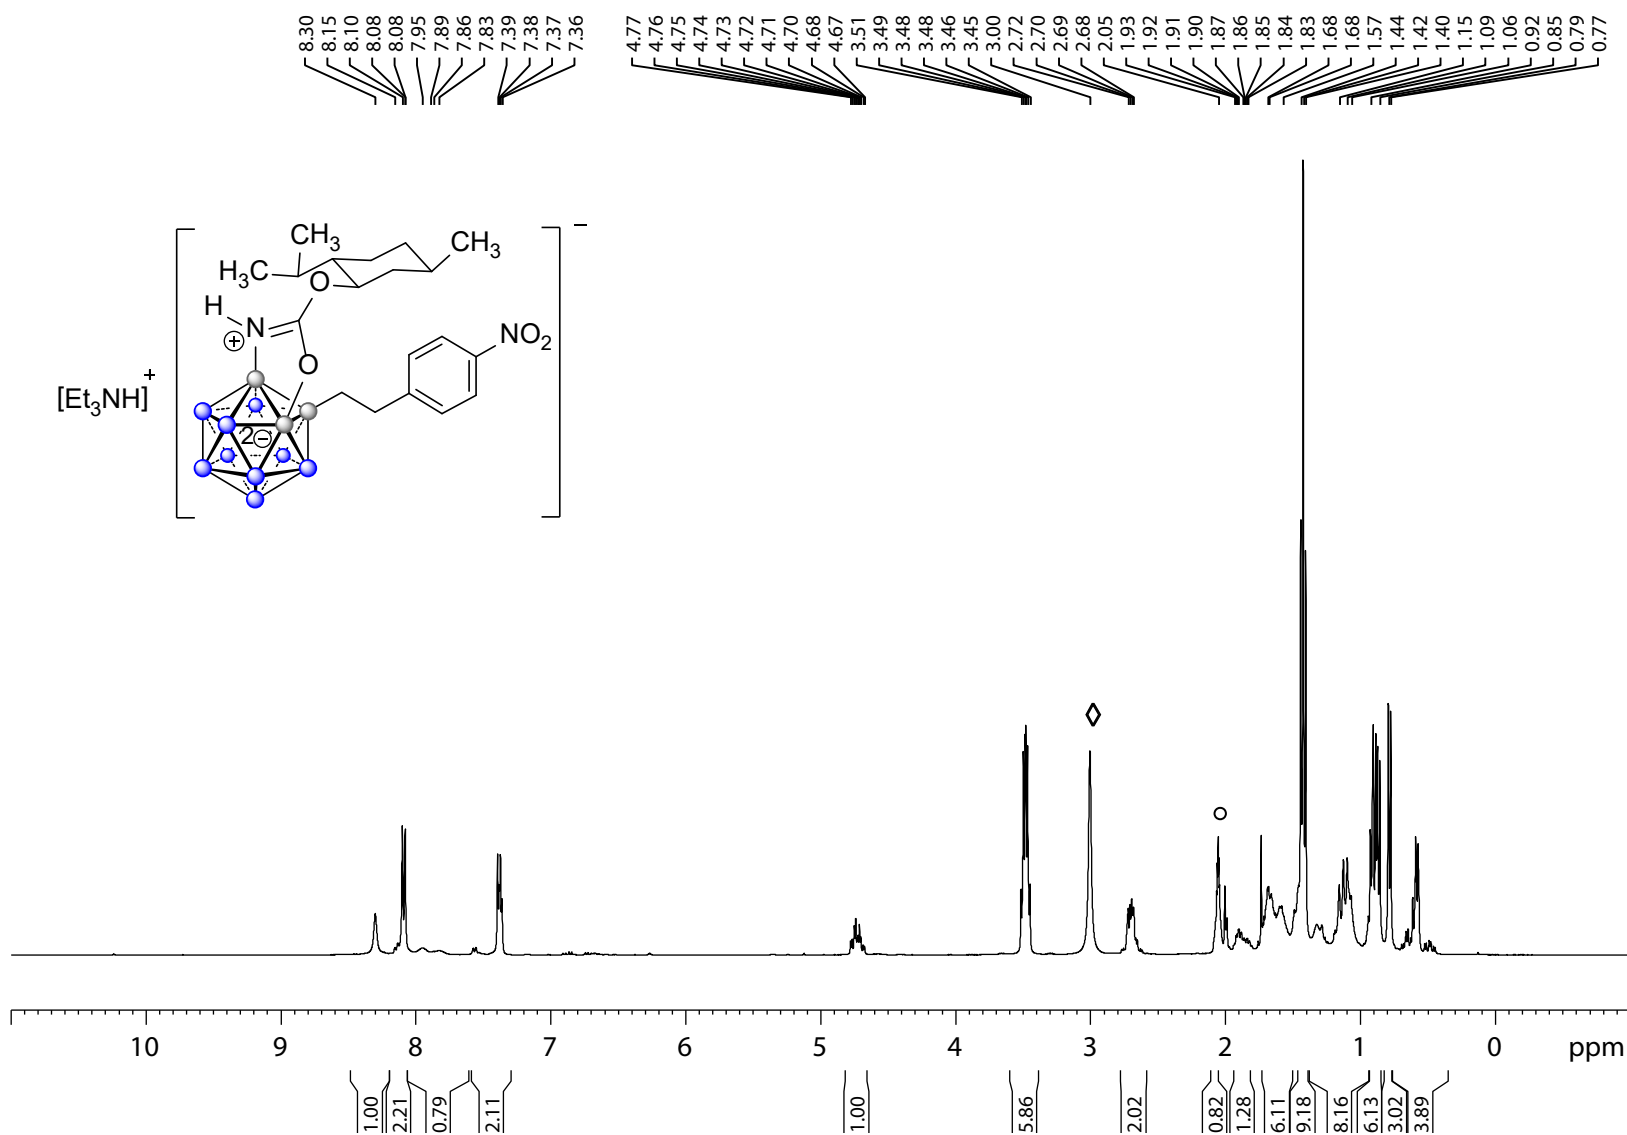

Current Data Parameters  
 NAME 20190420-RV-B12M-4NO2-STYR  
 EXPNO 2  
 PROCNO 1

F2 - Acquisition Parameters  
 Date\_ 20190421  
 Time\_ 14.21  
 INSTRUM spect  
 PROBHD 5 mm PABBO BB/  
 PULPROG zgig30  
 TD 16384  
 SOLVENT Acetone  
 NS 16  
 DS 4  
 SWH 8012.820 Hz  
 FIDRES 0.489064 Hz  
 AQ 1.0223616 sec  
 RG 64.43  
 DW 62.400 usec  
 DE 6.50 usec  
 TE 296.4 K  
 D1 1.00000000 sec  
 D11 0.03000000 sec  
 TDO 1

==== CHANNEL f1 =====  
 NUC1 1H  
 P1 15.00 usec  
 PLW1 12.50000000 W  
 SFO1 400.1320007 MHz

==== CHANNEL f2 =====  
 CPDPRG[2] garp4  
 NUC2 11B  
 PCPD2 90.00 usec  
 PLW2 52.96599960 W  
 PLW12 0.64477998 W  
 SFO2 128.3776050 MHz

F2 - Processing parameters  
 SI 32768  
 SF 400.1300071 MHz  
 WDW EM  
 SSB 0  
 LB 1.00 Hz  
 GB 0  
 PC 1.40

20190420-B12M-4COONO2Styr 20 mg white solid [Et<sub>3</sub>NH][B<sub>12</sub>H<sub>10</sub>NHC(Menthyl)OCH<sub>2</sub>CH<sub>2</sub>C<sub>6</sub>H<sub>4</sub>NO<sub>2</sub>] dissolved in 0.6 mL acetone-d<sub>6</sub>\*

<sup>11</sup>B NMR 128MHz

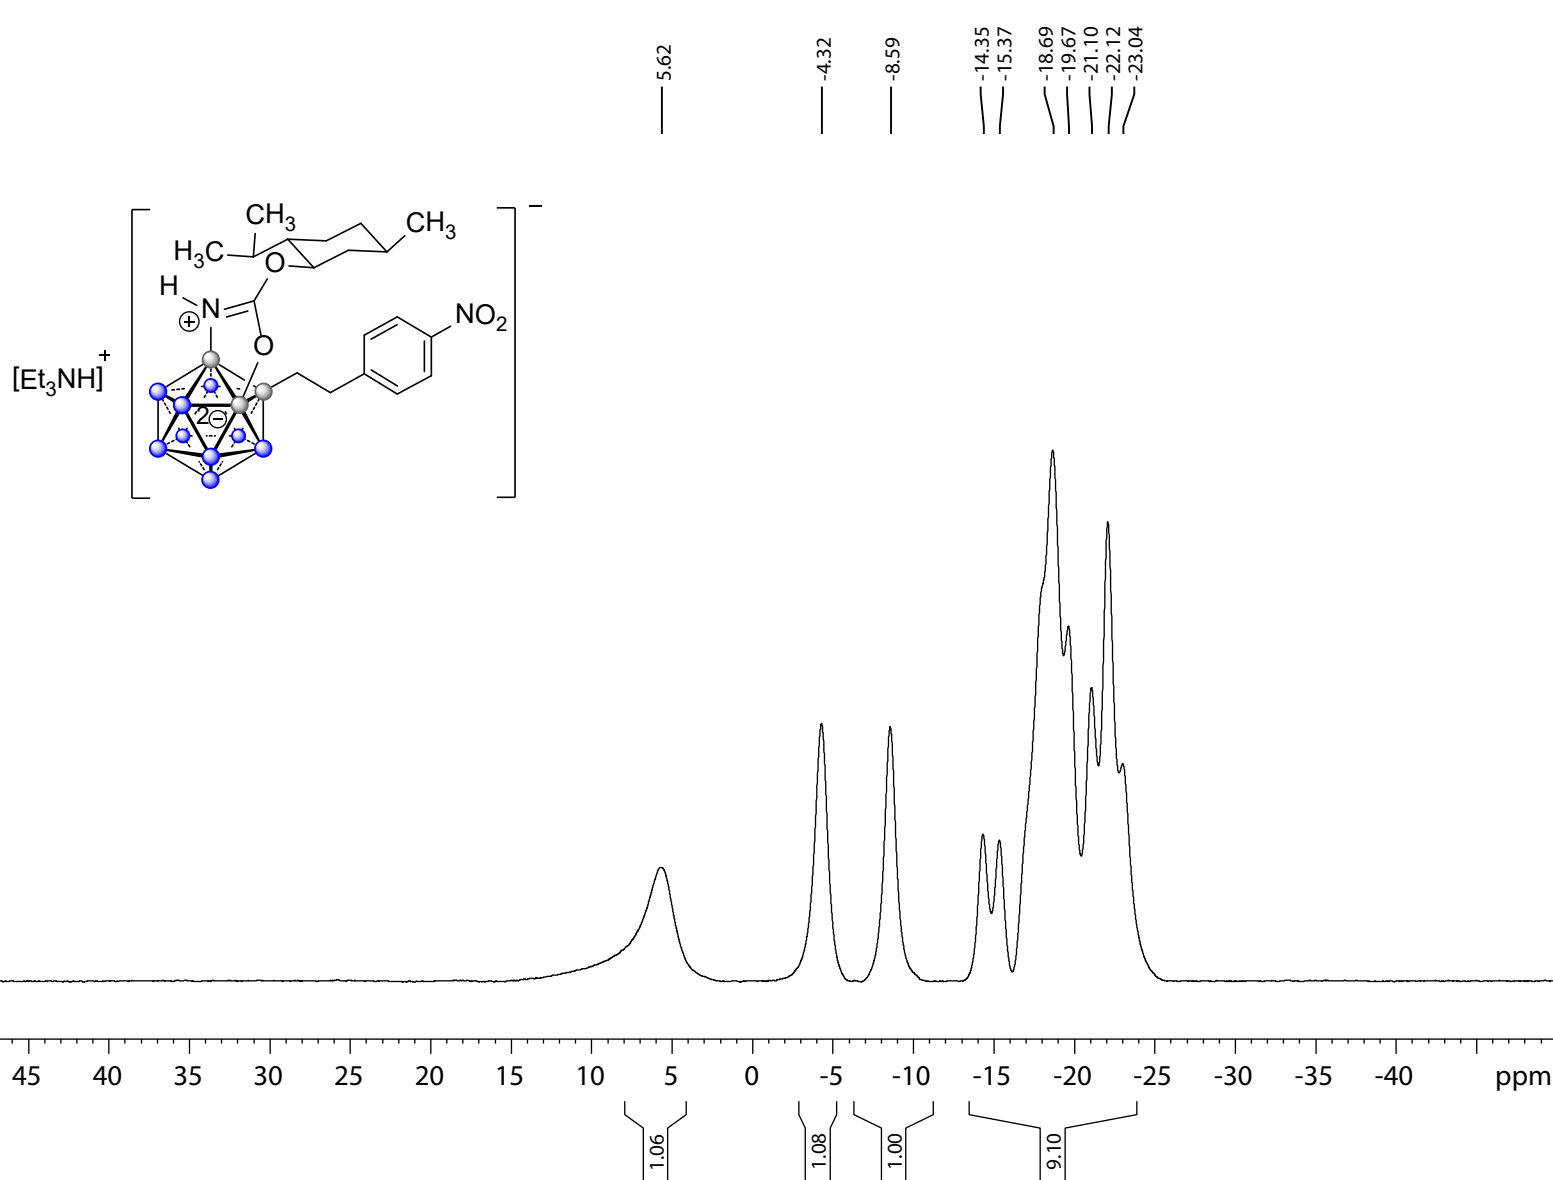

Current Data Parameters  
 NAME 20190420-RD-B12M-4NO2-STYR  
 EXPNO 3  
 PROCNO 1

F2 - Acquisition Parameters  
 Date\_ 20190421  
 Time\_ 14.27  
 INSTRUM spect  
 PROBHD 5 mm PABBO BB/  
 PULPROG zg  
 TD 65536  
 SOLVENT Acetone  
 NS 128  
 DS 4  
 SWH 25510.203 Hz  
 FIDRES 0.389255 Hz  
 AQ 1.2845056 sec  
 RG 193.34  
 DW 19.600 usec  
 DE 6.50 usec  
 TE 296.2 K  
 D1 1.0000000 sec  
 TD0 1

===== CHANNEL f1 =====  
 NUC1 11B  
 P1 9.93 usec  
 PLW1 52.96599960 W  
 SFO1 128.3776052 MHz

F2 - Processing parameters  
 SI 32768  
 SF 128.3776050 MHz  
 WDW EM  
 SSB 0  
 LB 10.00 Hz  
 GB 0  
 PC 1.40

20190420-B12M-4COONO2Styr 20 mg white solid  $[\text{Et}_3\text{NH}][\text{B}_{12}\text{H}_{10}\text{NHC}(\text{Menthyl})\text{OCH}_2\text{CH}_2\text{C}_6\text{H}_4\text{NO}_2]$  dissolved in 0.6 mL acetone- $d_6^*$

$^{11}\text{B}\{^1\text{H}\}$  NMR 128MHz

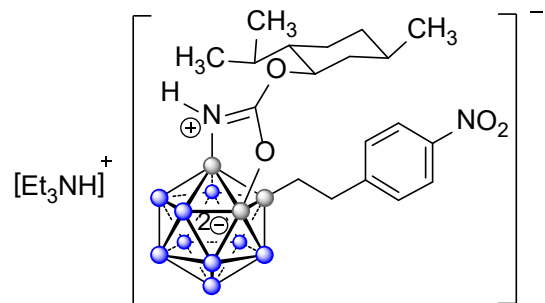

5.60  
-4.33  
-8.59  
-14.86  
-18.37  
-19.16  
-21.61

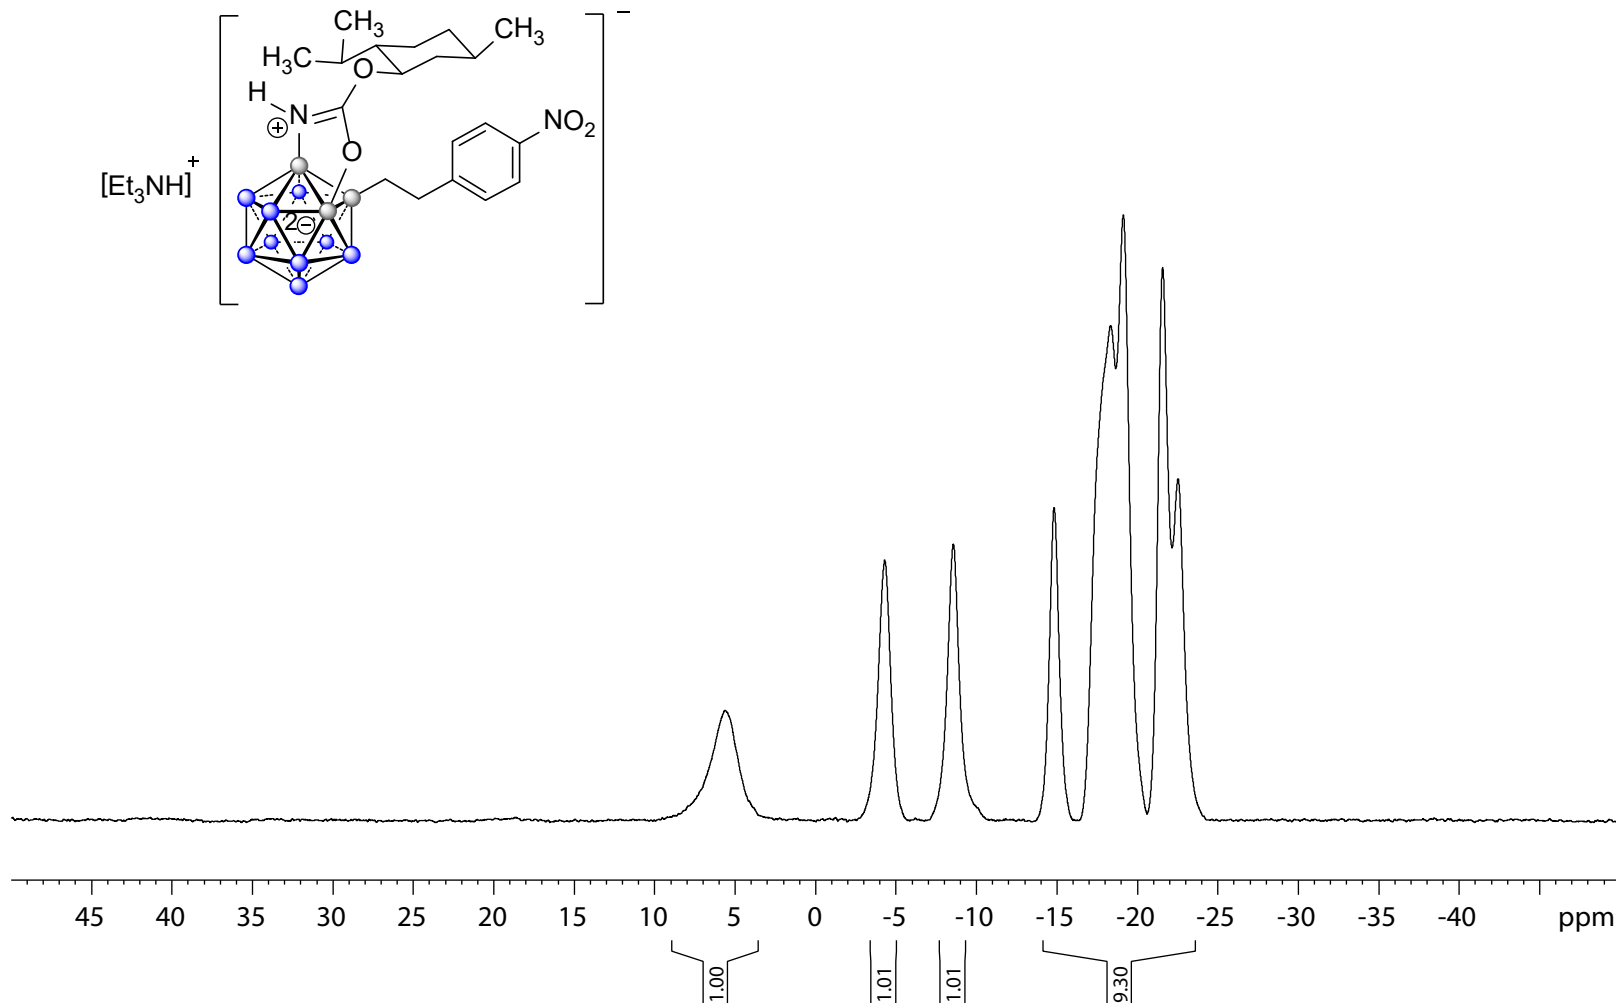

Current Data Parameters  
NAME 20190420-RD-B12M-4NO2-STYR  
EXPNO 4  
PROCNO 1

F2 - Acquisition Parameters  
Date\_ 20190421  
Time\_ 14.33  
INSTRUM spect  
PROBHD 5 mm PABBO BB/  
PULPROG zgpg30  
TD 65536  
SOLVENT Acetone  
NS 128  
DS 4  
SWH 25510.203 Hz  
FIDRES 0.389255 Hz  
AQ 1.2845056 sec  
RG 193.34  
DW 19.600 usec  
DE 6.50 usec  
TE 296.5 K  
D1 1.00000000 sec  
D11 0.03000000 sec  
TD0 1

==== CHANNEL f1 =====  
NUC1 11B  
P1 9.93 usec  
PLW1 52.96599960 W  
SFO1 128.3776050 MHz

==== CHANNEL f2 =====  
CPDPRG[2] waltz16  
NUC2 1H  
PCPD2 80.00 usec  
PLW2 12.50000000 W  
PLW12 0.43945000 W  
PLW13 0.28125000 W  
SFO2 400.1320007 MHz

F2 - Processing parameters  
SI 32768  
SF 128.3776050 MHz  
WDW EM  
SSB 0  
LB 10.00 Hz  
GB 0  
PC 1.40

20190420-B12M-4COONO2Styr 20 mg white solid  $[\text{Et}_3\text{NH}][\text{B}_{12}\text{H}_{10}\text{NHC}(\text{Menthyl})\text{OCH}_2\text{CH}_2\text{C}_6\text{H}_4\text{NO}_2]$  dissolved in 0.6 mL acetone- $d_6^*$

$^{13}\text{C}\{^1\text{H}\}$  NMR 100 MHz

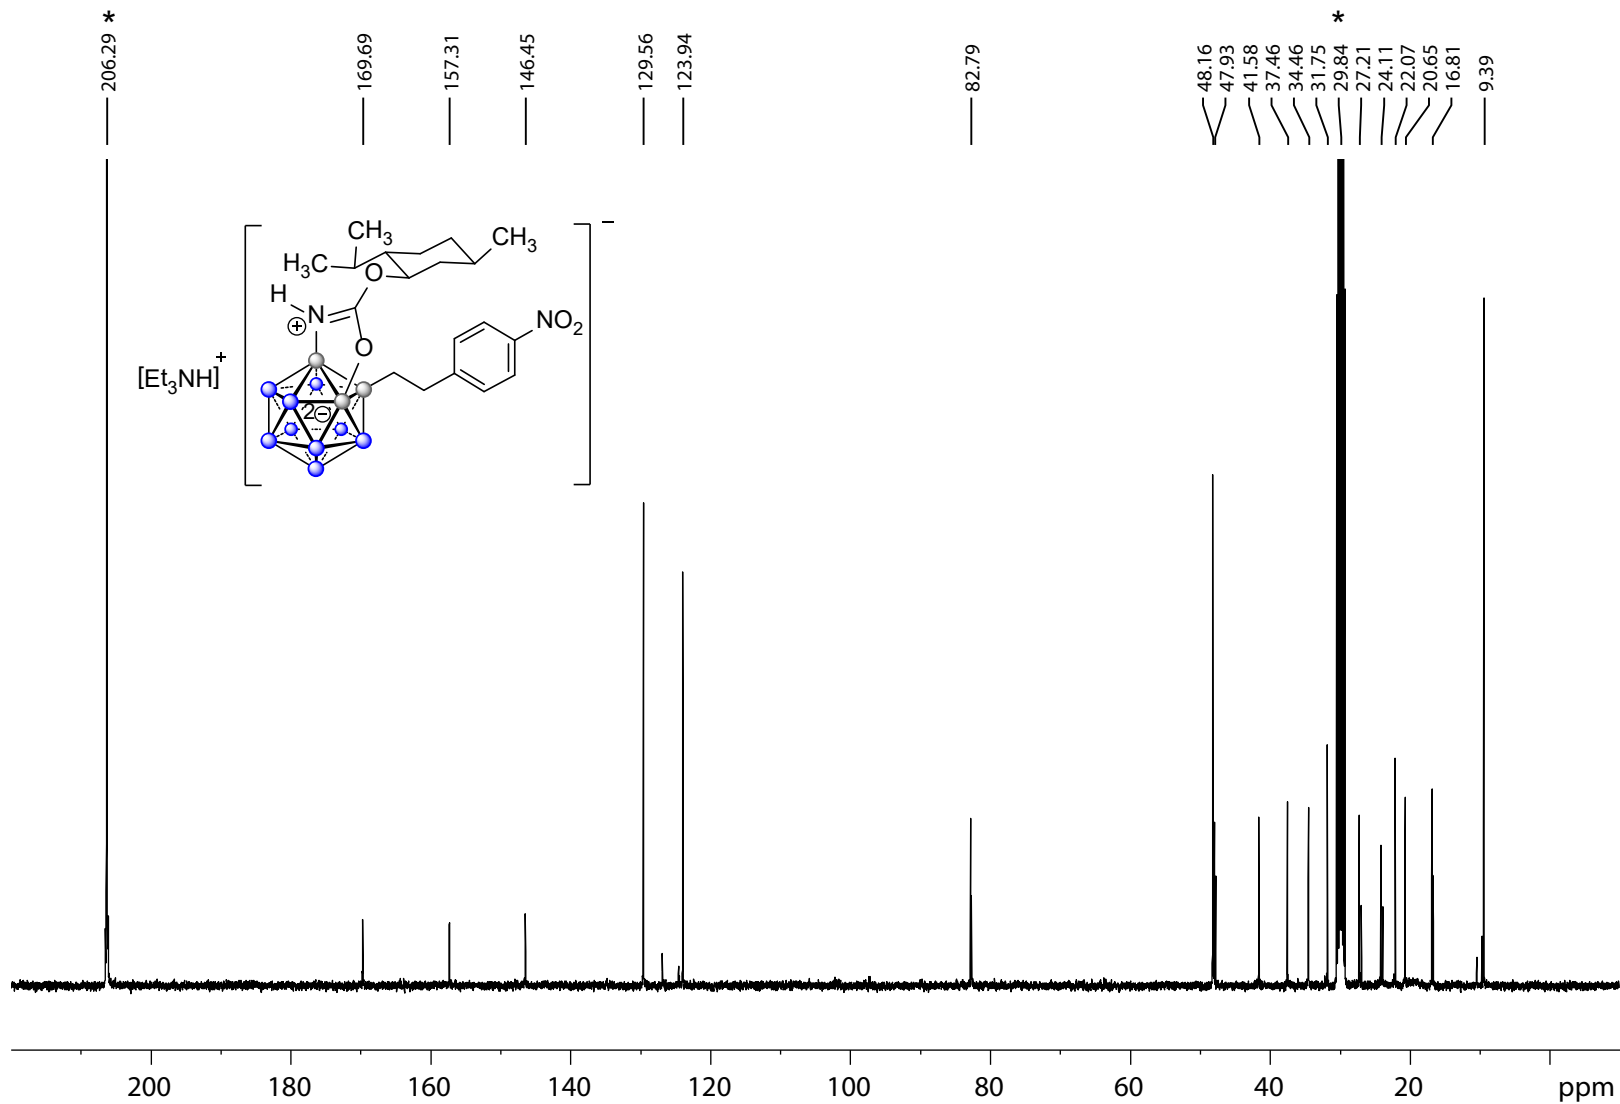

Current Data Parameters  
 NAME 20190420-RD-B12M-4NO2-STYR  
 EXPNO 5  
 PROCNO 1

F2 - Acquisition Parameters

Date\_ 20190421  
 Time 16.05  
 INSTRUM spect  
 PROBHD 5 mm PABBO BB/  
 PULPROG zgpg30  
 TD 65536  
 SOLVENT Acetone  
 NS 2048  
 DS 4  
 SWH 29761.904 Hz  
 FIDRES 0.454131 Hz  
 AQ 1.1010048 sec  
 RG 193.34  
 DW 16.800 usec  
 DE 6.50 usec  
 TE 296.9 K  
 D1 1.50000000 sec  
 D11 0.03000000 sec  
 TD0 1

==== CHANNEL f1 =====

NUC1 13C  
 P1 10.00 usec  
 PLW1 53.00000000 W  
 SFO1 100.6228293 MHz

==== CHANNEL f2 =====

CPDPRG[2] waltz16  
 NUC2 1H  
 PCPD2 80.00 usec  
 PLW2 12.50000000 W  
 PLW12 0.43945000 W  
 PLW13 0.28125000 W  
 SFO2 400.1316005 MHz

F2 - Processing parameters

SI 32768  
 SF 100.6126849 MHz  
 WDW EM  
 SSB 0  
 LB 1.00 Hz  
 GB 0  
 PC 1.40

20190420-B12M-4COONO2Styr 20 mg white solid  $[\text{Et}_3\text{NH}][\text{B}_{12}\text{H}_{10}\text{NHC}(\text{Menthyl})\text{OCH}_2\text{CH}_2\text{C}_6\text{H}_4\text{NO}_2]$  dissolved in 0.6 mL acetone- $d_6^*$

$^{13}\text{C}$  DEPT NMR 100 MHz

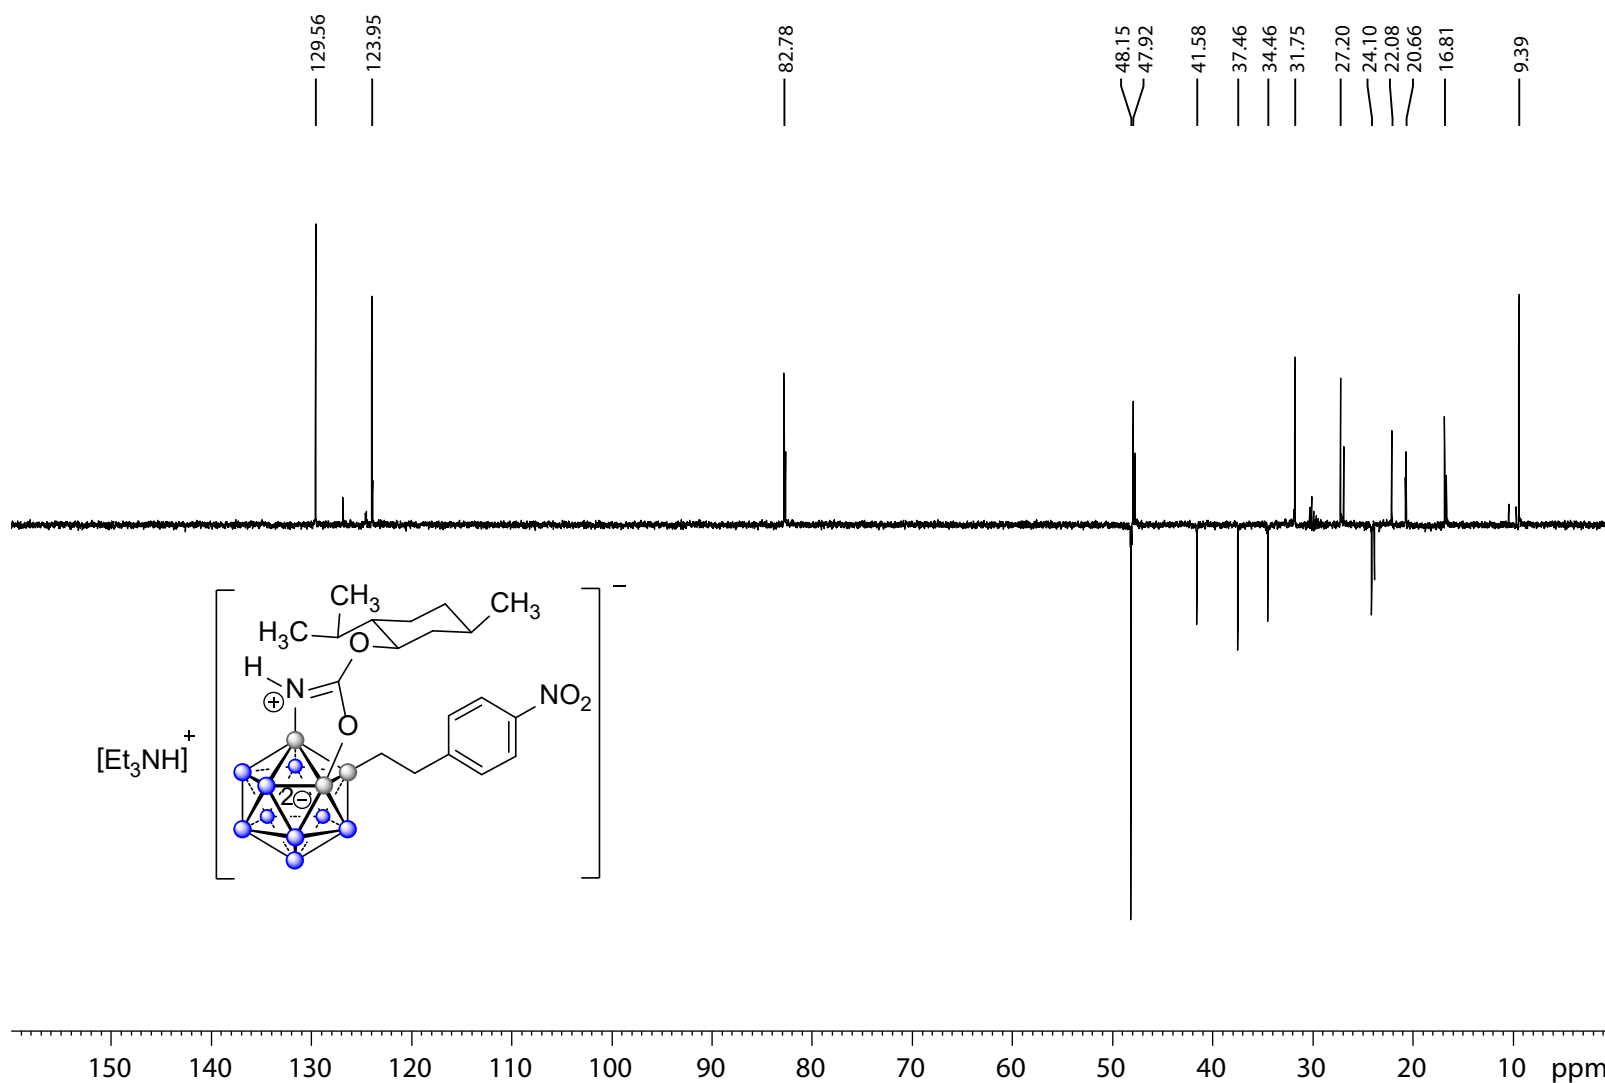

Current Data Parameters  
 NAME 20190420-RD-B12M-4NO2-STYR  
 EXPNO 6  
 PROCNO 1

F2 - Acquisition Parameters  
 Date\_ 20190421  
 Time 16.33  
 INSTRUM spect  
 PROBHD 5 mm PABBO BB/  
 PULPROG dept135  
 TD 65536  
 SOLVENT Acetone  
 NS 512  
 DS 4  
 SWH 29296.875 Hz  
 FIDRES 0.447035 Hz  
 AQ 1.1184810 sec  
 RG 193.34  
 DW 17.067 usec  
 DE 6.50 usec  
 TE 296.4 K  
 CNST2 145.0000000  
 D1 2.00000000 sec  
 D2 0.00344828 sec  
 D12 0.00002000 sec  
 TD0 1

===== CHANNEL f1 =====  
 NUC1 13C  
 P1 10.00 usec  
 P2 20.00 usec  
 PLW1 53.00000000 W  
 SFO1 100.6228293 MHz

===== CHANNEL f2 =====  
 CPDPRG[2] waltz16  
 NUC2 1H  
 P3 15.00 usec  
 P4 30.00 usec  
 PCPD2 80.00 usec  
 PLW2 12.50000000 W  
 PLW12 0.43945000 W  
 SFO2 400.1316005 MHz

F2 - Processing parameters  
 SI 32768  
 SF 100.6126847 MHz  
 WDW EM  
 SSB 0  
 LB 1.00 Hz  
 GB 0  
 PC 4.00

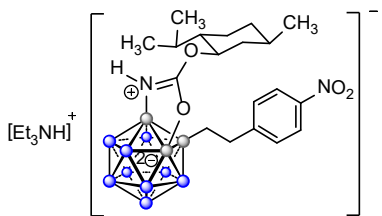

<sup>1</sup>H - <sup>1</sup>H COSY NMR

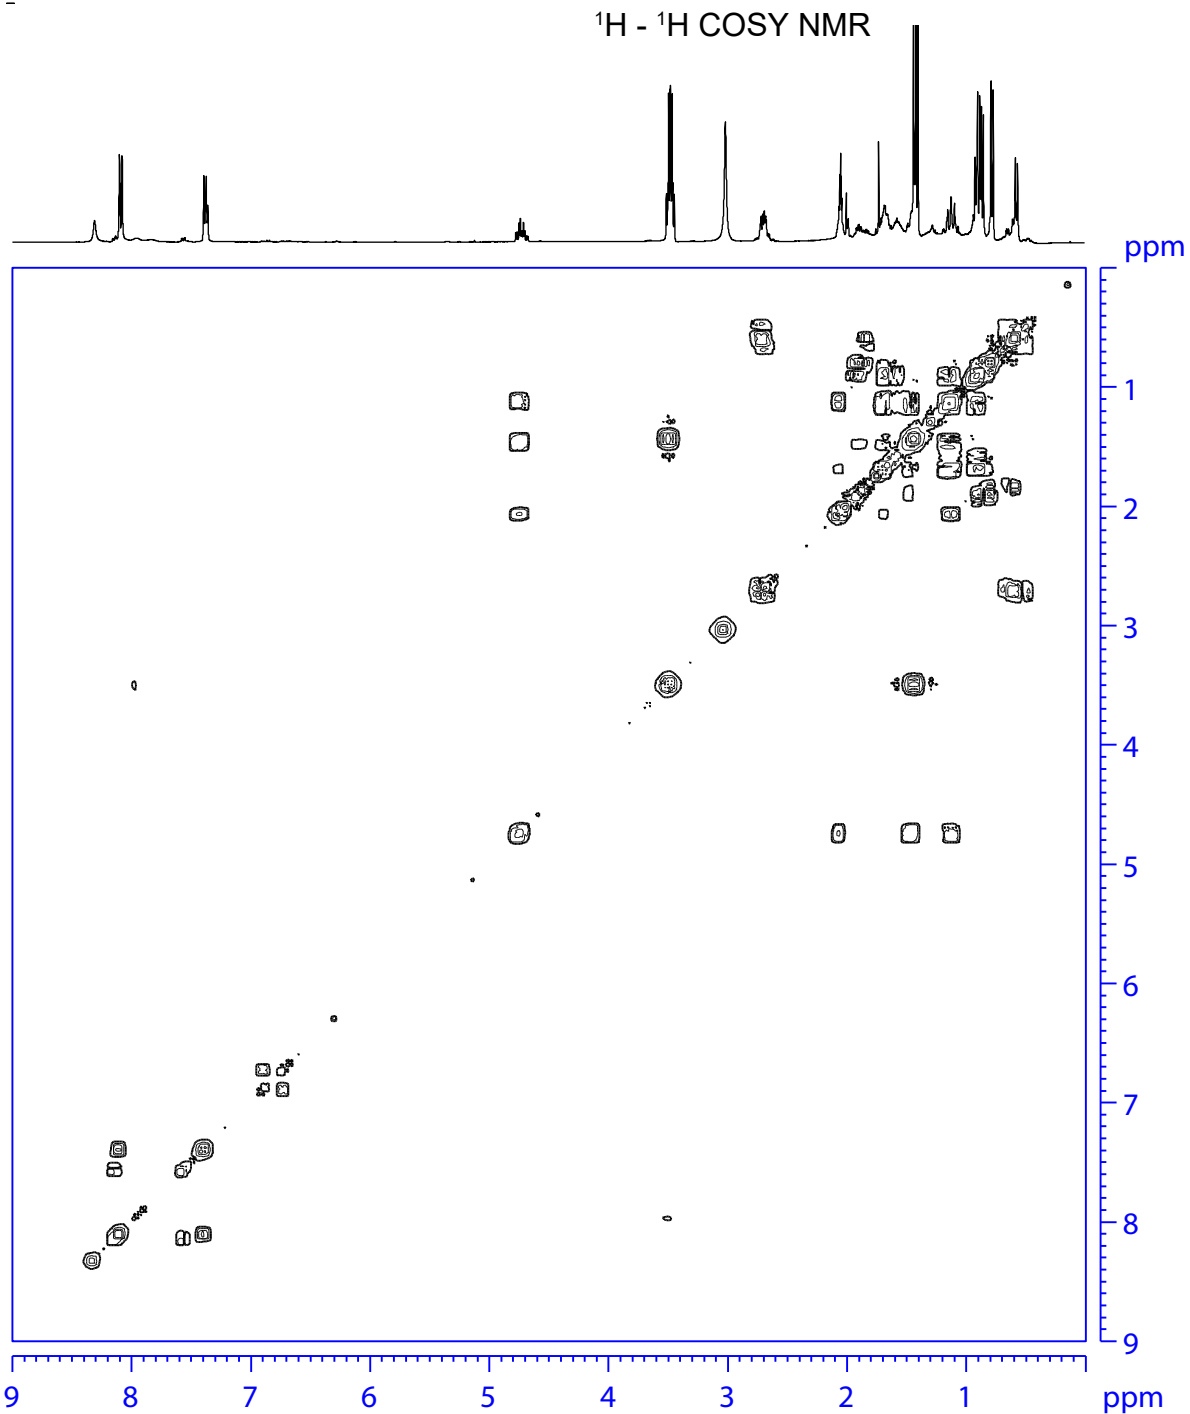

Current Data Parameters  
 NAME 20190420-RD-B12M-4NO2-STYR  
 EXPNO 8  
 PROCNO 1

F2 - Acquisition Parameters  
 Date\_ 20190421  
 Time\_ 16.49  
 INSTRUM spect  
 PROBHD 5 mm PABBO BB/  
 PULPROG cosygpppqf  
 TD 2048  
 SOLVENT Acetone  
 NS 2  
 DS 8  
 SWH 5341.880 Hz  
 FIDRES 2.608340 Hz  
 AQ 0.1916928 sec  
 RG 107.6  
 DW 93.600 usec  
 DE 6.50 usec  
 TE 296.0 K  
 D0 0.0000300 sec  
 D1 2.0000000 sec  
 D11 0.0300000 sec  
 D12 0.0000200 sec  
 D13 0.0000400 sec  
 D16 0.0002000 sec  
 INO 0.00018720 sec

===== CHANNEL f1 =====  
 NUC1 1H  
 P0 15.00 usec  
 P1 15.00 usec  
 P17 2500.00 usec  
 PLW1 12.5000000 W  
 PLW10 4.16050005 W  
 SFO1 400.1324057 MHz

===== GRADIENT CHANNEL =====  
 GPNAM[1] SMSQ10.100  
 GPZ1 10.00 %  
 P16 1000.00 usec

F1 - Acquisition parameters  
 TD 128  
 SFO1 400.1324 MHz  
 FIDRES 83.466881 Hz  
 SW 13.350 ppm  
 FvMODE QF

F2 - Processing parameters  
 SI 1024  
 SF 400.1300000 MHz  
 WDW QSINE  
 SSB 0  
 LB 0 Hz  
 GB 0  
 PC 1.40

F1 - Processing parameters  
 SI 1024  
 MC2 QF  
 SF 400.1300000 MHz  
 WDW QSINE  
 SSB 0  
 LB 0 Hz  
 GB 0

<sup>1</sup>H - <sup>13</sup>C HSQC NMR

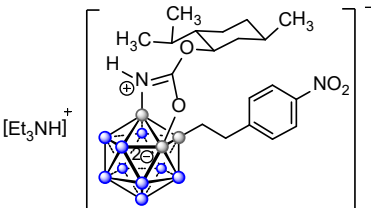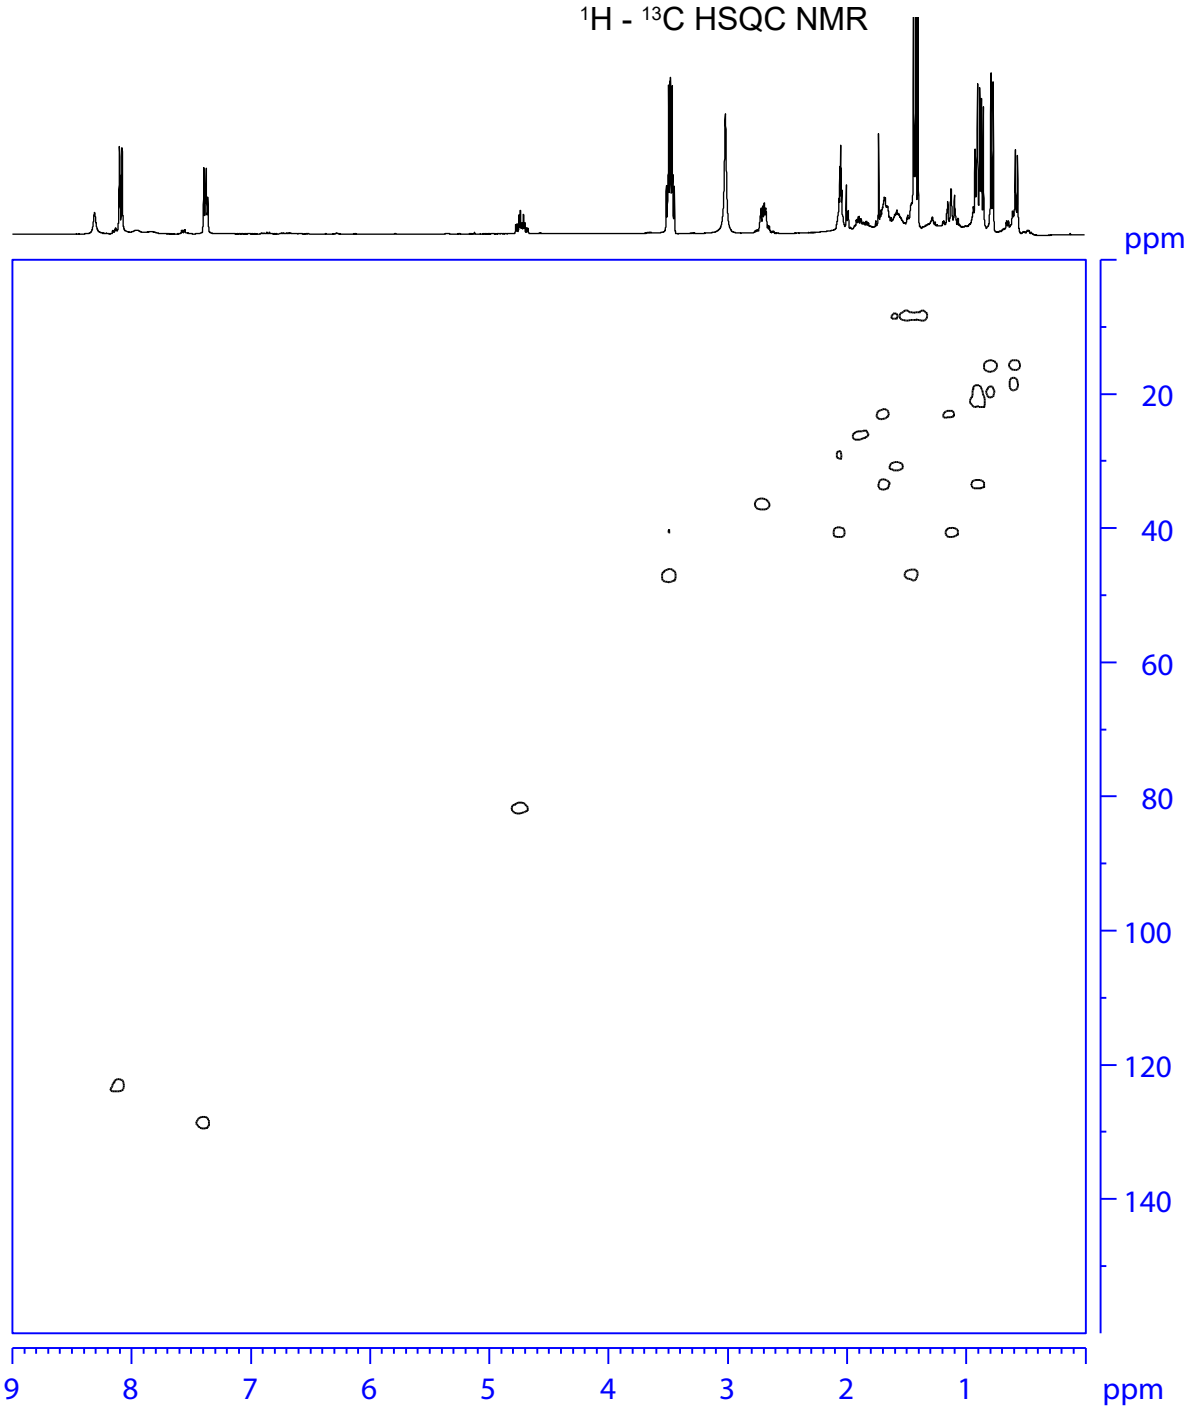

```

Current Data Parameters
NAME      20190420-RD-B12M-4NO2-STYR
EXPNO    7
PROCNO   1

F2 - Acquisition Parameters
Date_    20190421
Time     16.35
INSTRUM  spect
PROBHD   5 mm PABBO BB/
PULPROG  hsqcetgpsi2
TD       1024
SOLVENT  Acetone
NS       2
DS       16
SWH      6009.615 Hz
FIDRES   5.868765 Hz
AQ       0.0851968 sec
RG       193.34
DW       83.200 usec
DE       6.50 usec
TE       296.2 K
CNST2    145.0000000
D0       0.00000300 sec
D1       1.50000000 sec
D4       0.00172414 sec
D11      0.03000000 sec
D16      0.00020000 sec
D24      0.00086207 sec
IN0      0.00001990 sec
2GOPTNS

===== CHANNEL f1 =====
NUC1     1H
P1       15.00 usec
P2       30.00 usec
P28      1000.00 usec
PLW1     12.50000000 W
SFO1     400.1328009 MHz

===== CHANNEL f2 =====
CPDPRG[2]  garp
NUC2     13C
F3       10.00 usec
F4       20.00 usec
PCPD2    70.00 usec
PLW2     53.00000000 W
PLW12    1.08159995 W
SFO2     100.6238364 MHz

===== GRADIENT CHANNEL =====
GPNAM[1]  SMSQ10.100
GPNAM[2]  SMSQ10.100
GPNAM[3]  SMSQ10.100
GPNAM[4]  SMSQ10.100
GP21      80.00 %
GP22      20.10 %
GP23      11.00 %
GP24      -5.00 %
P16       1000.00 usec
P19       600.00 usec

F1 - Acquisition parameters
TD        256
SFO1     100.6238 MHz
FIDRES    196.524048 Hz
SW        249.991 ppm
FhMODE    Echo-Antiecho

F2 - Processing parameters
SI        1024
SF        400.1300000 MHz
WDW       QSINE
SSB       2
LB        0 Hz
GB        0
PC        1.40

F1 - Processing parameters
SI        1024
MC2       echo-antiecho
SF        100.6127690 MHz
WDW       QSINE
SSB       2
LB        0 Hz
GB        0
    
```

20190501-B12M-EtAcr 20 mg white solid  $[\text{Et}_3\text{NH}][\text{B}_{12}\text{H}_{10}\text{NHC}(\text{Menthyl})\text{OCH}_2\text{CH}_2\text{COOEt}]$  dissolved in 0.6 mL acetone- $d_6^*$

400MHz  $^1\text{H}$  NMR,  $\circ$  deuterated solvent residual peak= 2.05 ppm;  $\diamond$  water peak

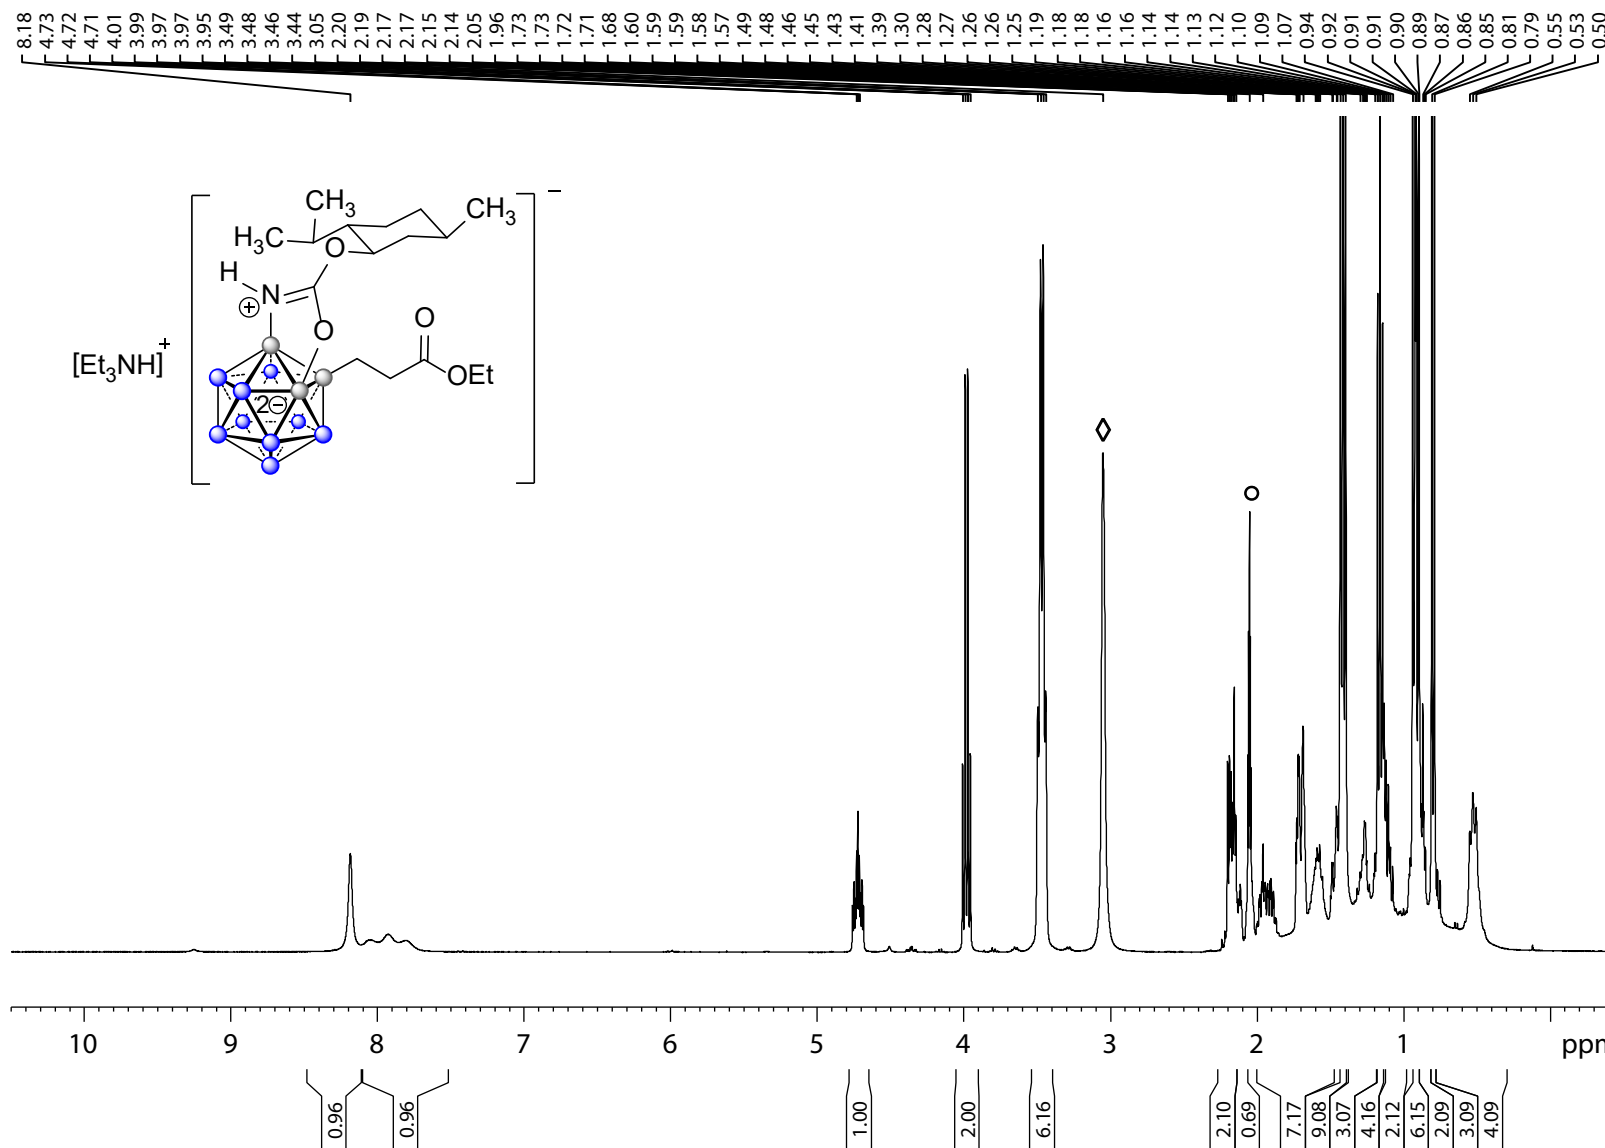

Current Data Parameters  
 NAME 20190501-RV-B12M-EtAcr  
 EXPNO 1  
 PROCNO 1

F2 - Acquisition Parameters  
 Date\_ 20190502  
 Time\_ 14.32  
 INSTRUM spect  
 PROBHD 5 mm PABBO BB/  
 PULPROG zg30  
 TD 65536  
 SOLVENT Acetone  
 NS 16  
 DS 2  
 SWH 10000.000 Hz  
 FIDRES 0.152588 Hz  
 AQ 3.2767999 sec  
 RG 55.74  
 DW 50.000 usec  
 DE 6.50 usec  
 TE 295.3 K  
 D1 1.00000000 sec  
 TDO 1

===== CHANNEL f1 =====  
 NUC1 1H  
 P1 15.00 usec  
 PLW1 12.5000000 W  
 SFO1 400.1328009 MHz

F2 - Processing parameters  
 SI 65536  
 SF 400.1300071 MHz  
 WDW EM  
 SSB 0  
 LB 0.30 Hz  
 GB 0  
 PC 1.00



20190501-B12M-EtAc 20 mg white solid [Et<sub>3</sub>NH][B<sub>12</sub>H<sub>10</sub>NHC(Menthyl)OCH<sub>2</sub>CH<sub>2</sub>COOEt] dissolved in 0.6 mL acetone-d<sub>6</sub>\*

400MHz <sup>1</sup>H{B} NMR, ◊ deuterated solvent residual peak= 2.05 ppm; ○ water peak

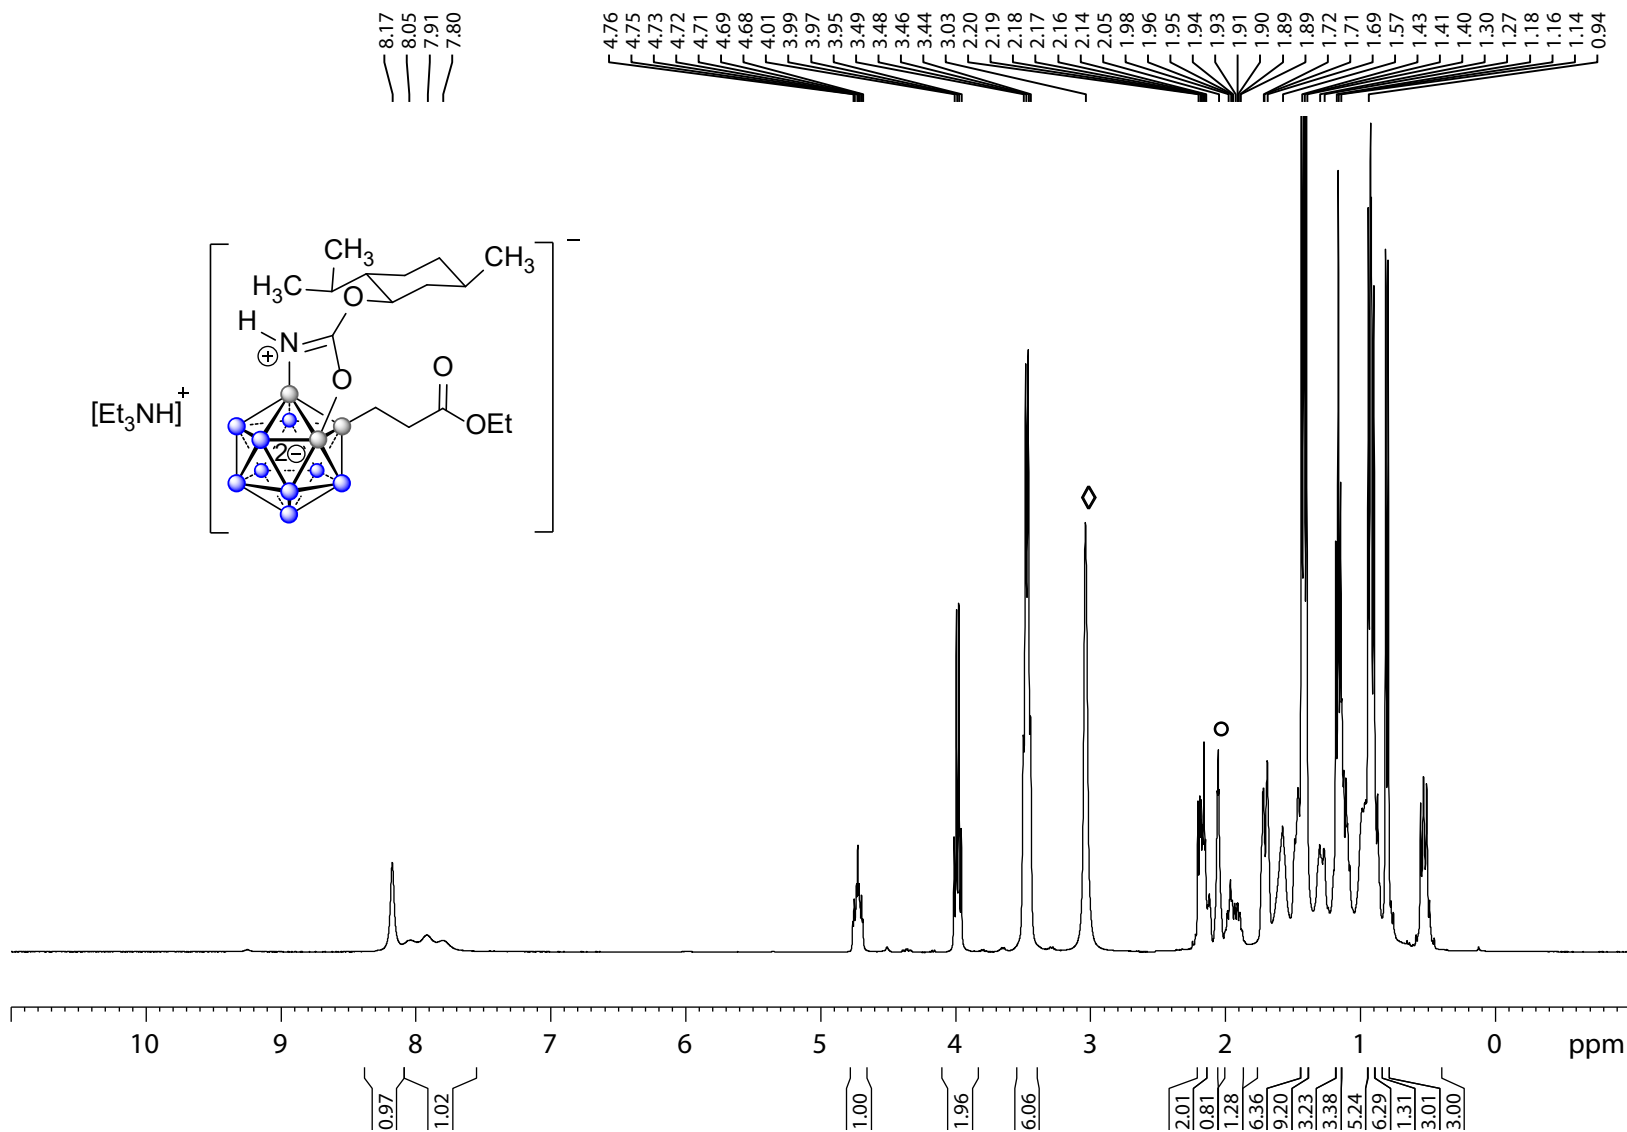

Current Data Parameters  
 NAME 20190501-RV-B12M-EtAc  
 EXPNO 2  
 PROCNO 1

F2 - Acquisition Parameters  
 Date\_ 20190502  
 Time\_ 14.34  
 INSTRUM spect  
 PROBHD 5 mm PABBO BB/  
 PULPROG zgig30  
 TD 16384  
 SOLVENT Acetone  
 NS 16  
 DS 4  
 SWH 8012.820 Hz  
 FIDRES 0.489064 Hz  
 AQ 1.0223616 sec  
 RG 55.74  
 DW 62.400 usec  
 DE 6.50 usec  
 TE 295.6 K  
 D1 1.00000000 sec  
 D11 0.03000000 sec  
 TD0 1

===== CHANNEL f1 =====  
 NUC1 1H  
 P1 15.00 usec  
 PLW1 12.50000000 W  
 SFO1 400.1320007 MHz

===== CHANNEL f2 =====  
 CPDPRG[2] garp4  
 NUC2 11B  
 PCPD2 90.00 usec  
 PLW2 52.96599960 W  
 PLW12 0.64477998 W  
 SFO2 128.3776050 MHz

F2 - Processing parameters  
 SI 32768  
 SF 400.1300073 MHz  
 WDW EM  
 SSB 0  
 LB 1.00 Hz  
 GB 0  
 PC 1.40

20190501-B12M-EtAc 20 mg white solid  $[\text{Et}_3\text{NH}][\text{B}_{12}\text{H}_{10}\text{NHC}(\text{Menthyl})\text{OCH}_2\text{CH}_2\text{COOEt}]$  dissolved in 0.6 mL acetone- $d_6^*$

$^{11}\text{B}$  NMR 128 MHz

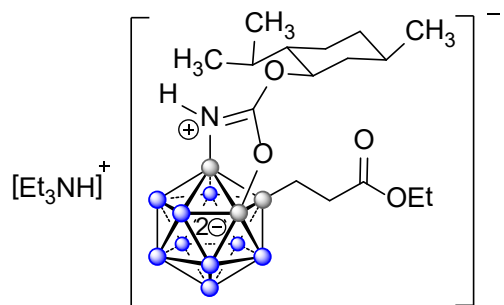

5.28  
-4.62  
-9.14  
-14.53  
-15.55  
-17.16  
-18.43  
-19.44  
-20.45  
-21.39  
-22.22

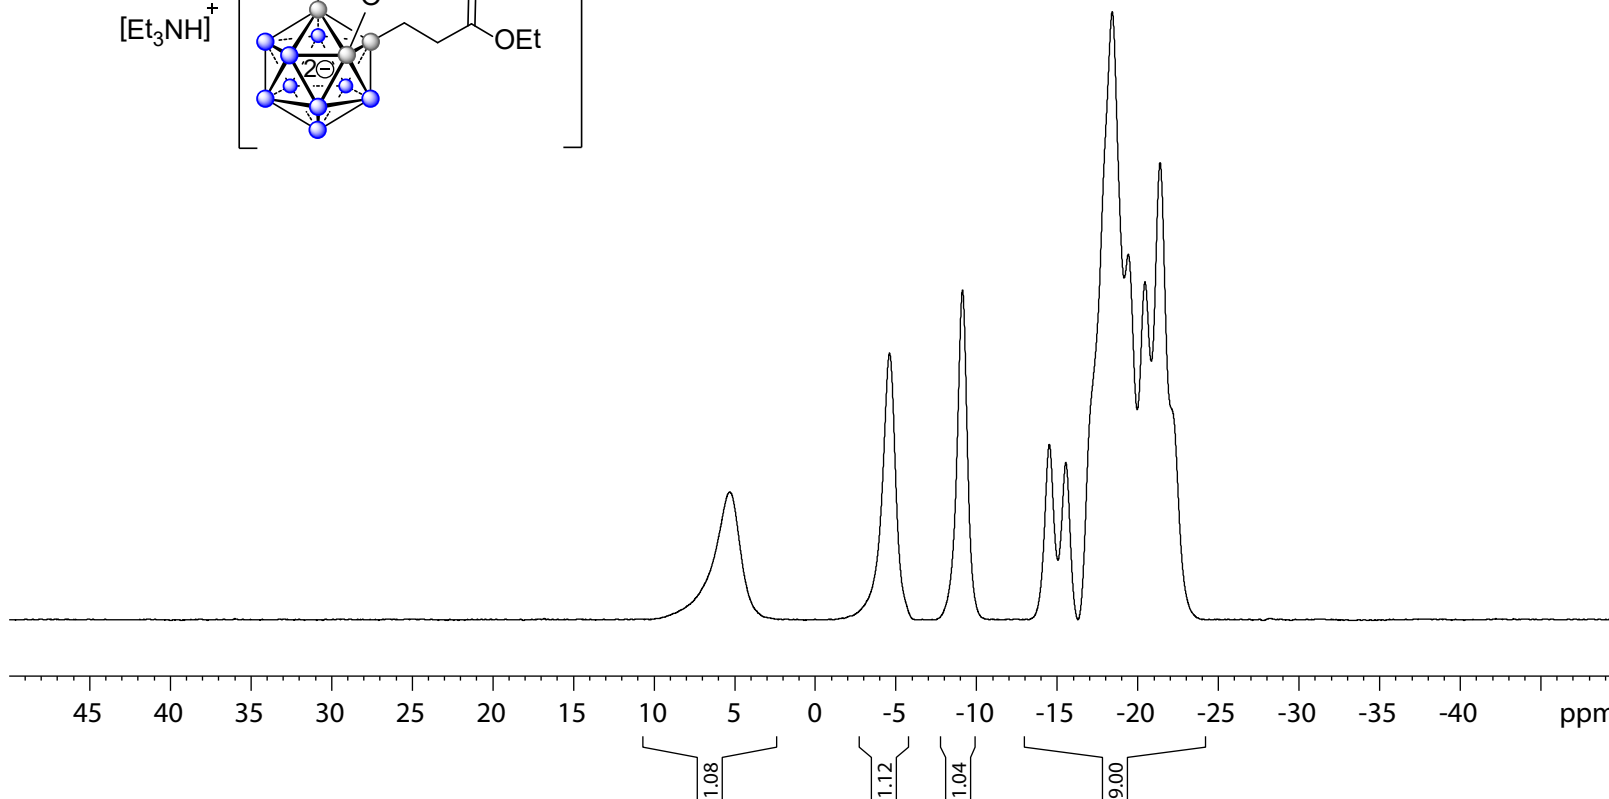

Current Data Parameters  
NAME 20190501-RV-B12M-EtAc  
EXPNO 3  
PROCNO 1

F2 - Acquisition Parameters  
Date\_ 20190502  
Time\_ 14.40  
INSTRUM spect  
PROBHD 5 mm PABBO BB/  
PULPROG zg  
TD 65536  
SOLVENT Acetone  
NS 128  
DS 4  
SWH 25510.203 Hz  
FIDRES 0.389255 Hz  
AQ 1.2845056 sec  
RG 193.34  
DW 19.600 usec  
DE 6.50 usec  
TE 295.3 K  
D1 1.00000000 sec  
TD0 1

===== CHANNEL f1 =====  
NUC1 11B  
P1 9.93 usec  
PLW1 52.96599960 W  
SFO1 128.3776052 MHz

F2 - Processing parameters  
SI 32768  
SF 128.3776050 MHz  
WDW EM  
SSB 0  
LB 10.00 Hz  
GB 0  
PC 1.40

20190501-B12M-EtAc 20 mg white solid  $[\text{Et}_3\text{NH}][\text{B}_{12}\text{H}_{10}\text{NHC}(\text{Menthyl})\text{OCH}_2\text{CH}_2\text{COOEt}]$  dissolved in 0.6 mL acetone- $d_6$ \*

$^{11}\text{B}\{^1\text{H}\}$  NMR 128 MHz

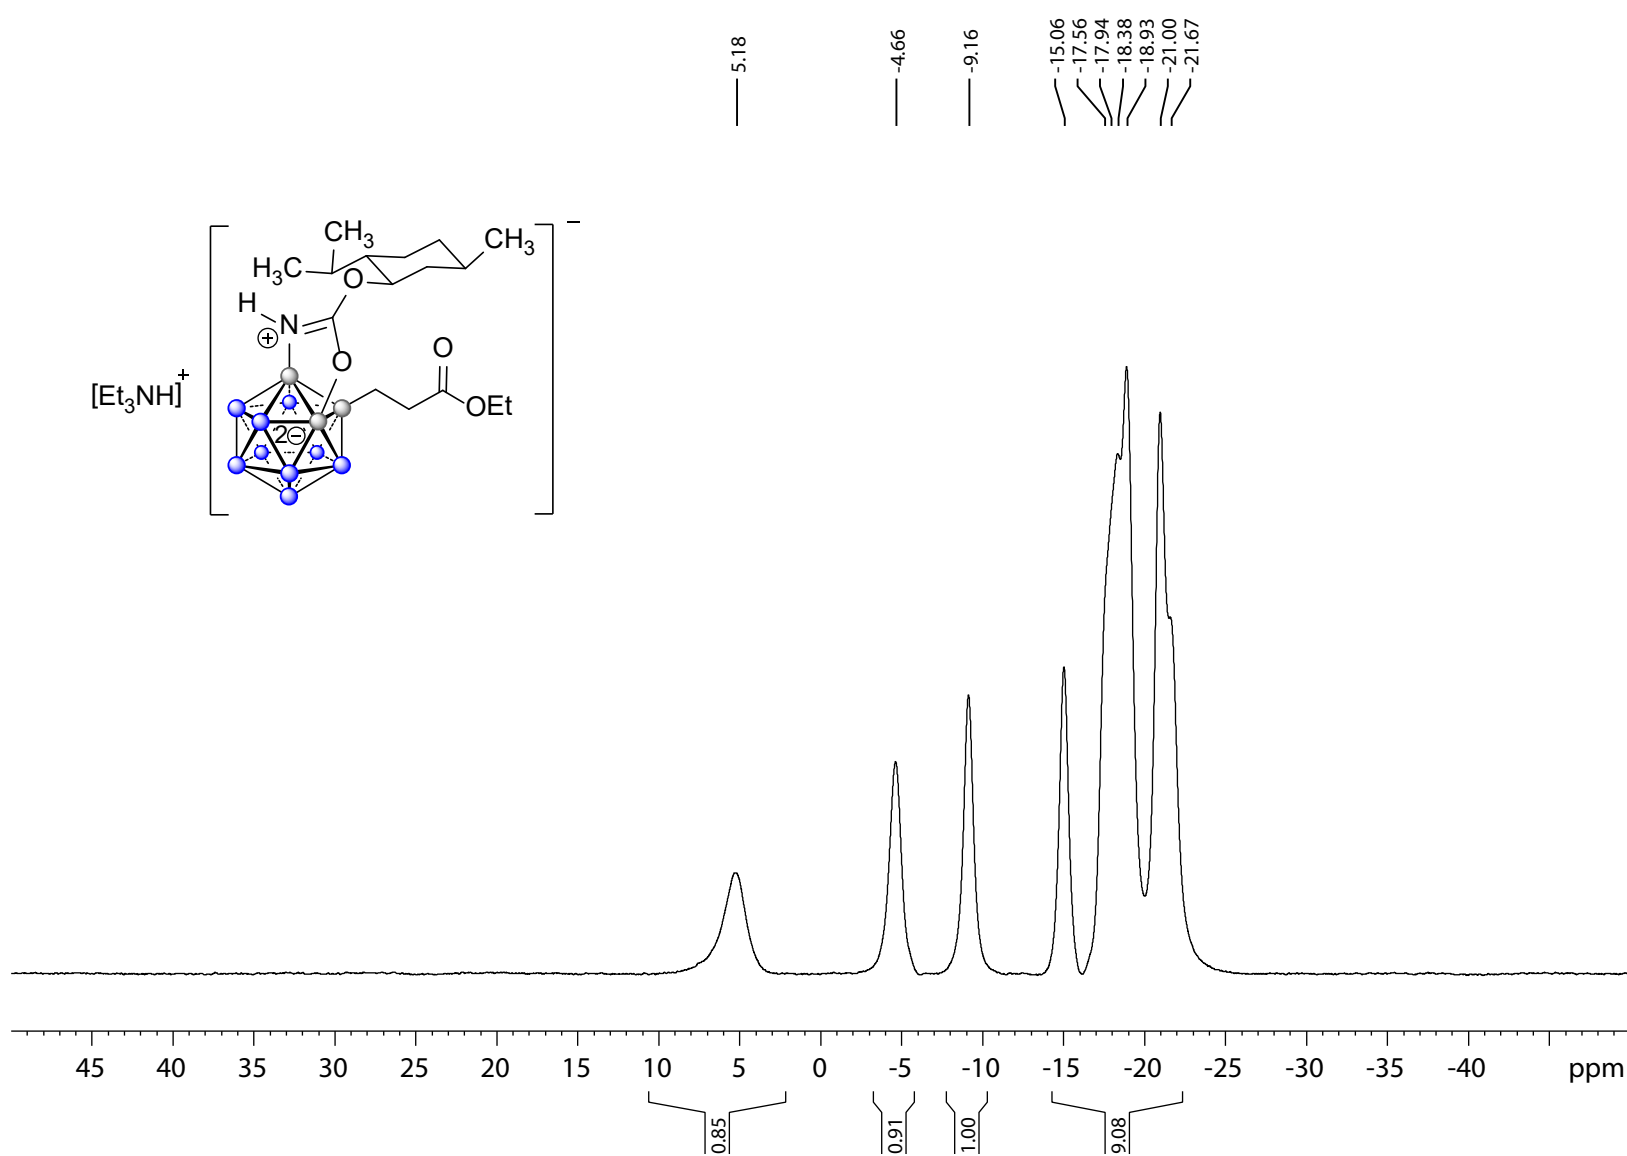

Current Data Parameters  
 NAME 20190501-RV-B12M-EtAc  
 EXPNO 4  
 PROCNO 1

F2 - Acquisition Parameters  
 Date\_ 20190502  
 Time\_ 14.47  
 INSTRUM spect  
 PROBHD 5 mm PABBO BB/  
 PULPROG zgpg30  
 TD 65536  
 SOLVENT Acetone  
 NS 128  
 DS 4  
 SWH 25510.203 Hz  
 FIDRES 0.389255 Hz  
 AQ 1.2845056 sec  
 RG 193.34  
 DW 19.600 usec  
 DE 6.50 usec  
 TE 296.2 K  
 D1 1.00000000 sec  
 D11 0.03000000 sec  
 TD0 1

==== CHANNEL f1 =====  
 NUC1 11B  
 P1 9.93 usec  
 PLW1 52.96599960 W  
 SFO1 128.3776050 MHz

==== CHANNEL f2 =====  
 CPDPRG[2] waltz16  
 NUC2 1H  
 PCPD2 80.00 usec  
 PLW2 12.50000000 W  
 PLW12 0.43945000 W  
 PLW13 0.28125000 W  
 SFO2 400.1320007 MHz

F2 - Processing parameters  
 SI 32768  
 SF 128.3776050 MHz  
 WDW EM  
 SSB 0  
 LB 10.00 Hz  
 GB 0  
 PC 1.40

20190501-B12M-EtAcr 20 mg white solid  $[\text{Et}_3\text{NH}][\text{B}_{12}\text{H}_{10}\text{NHC}(\text{Menthyl})\text{OCH}_2\text{CH}_2\text{COOEt}]$  dissolved in 0.6 mL acetone- $d_6^*$

$^{13}\text{C}\{^1\text{H}\}$  NMR 100 MHz

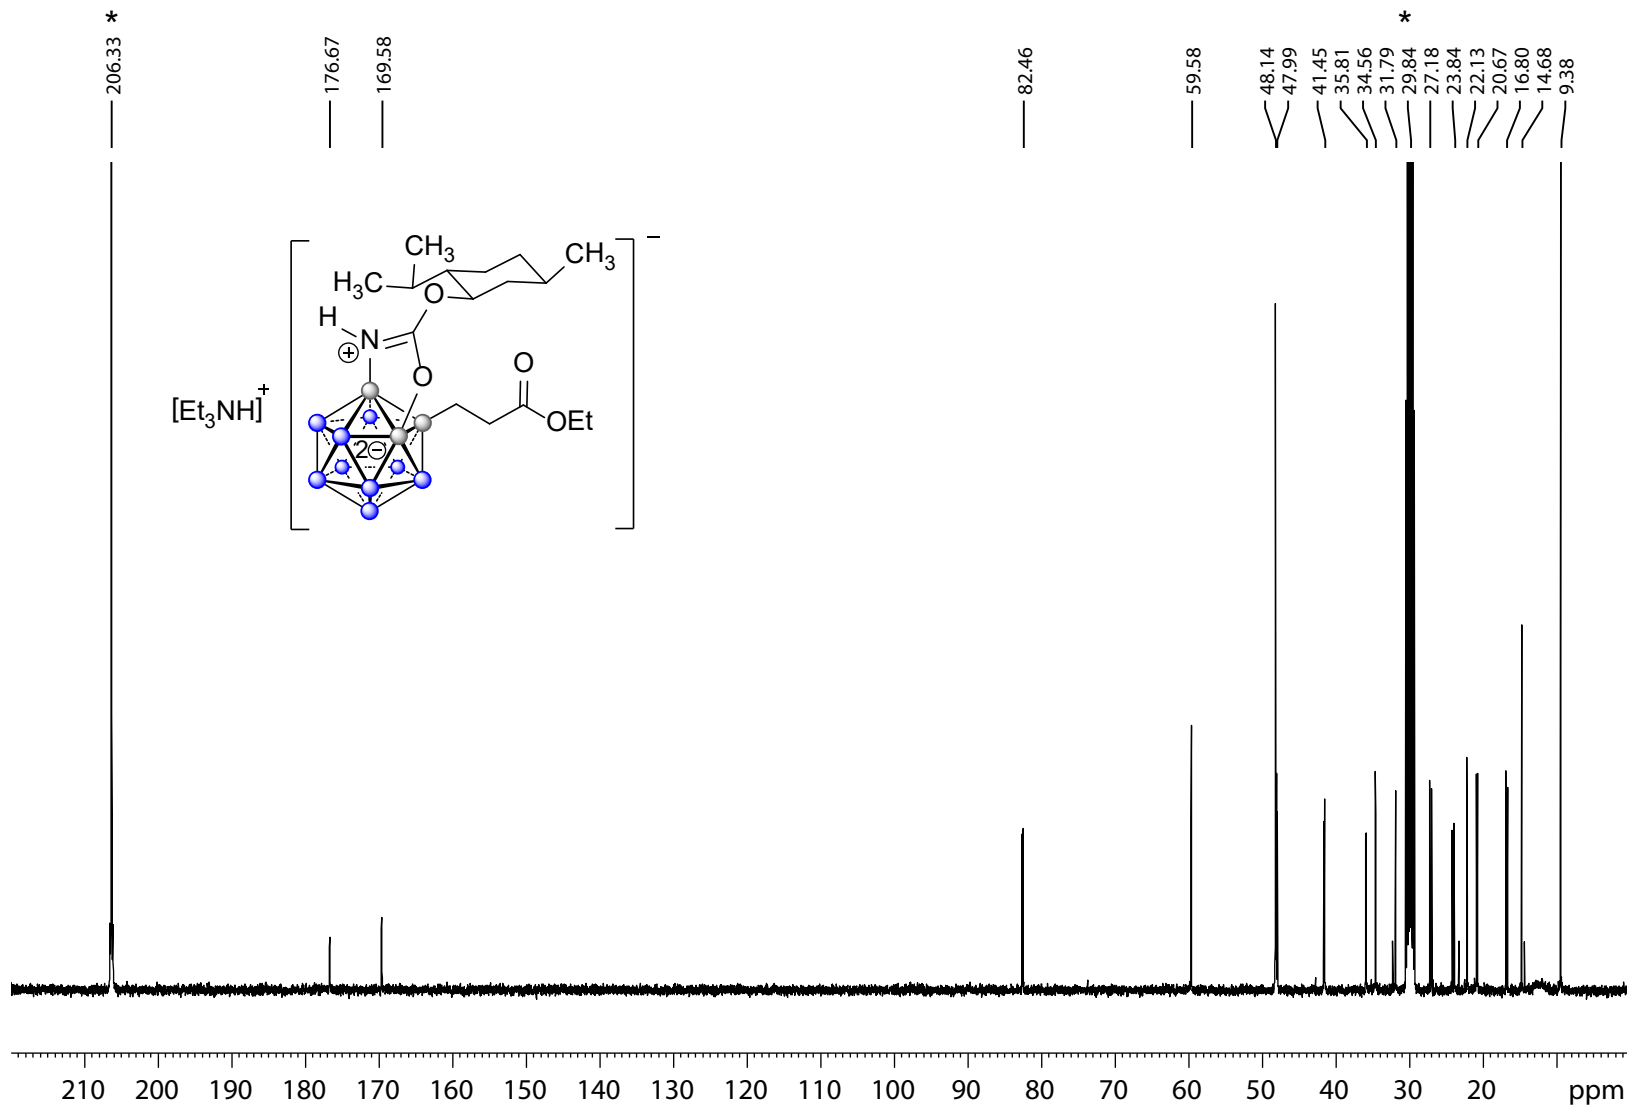

Current Data Parameters  
 NAME 20190501-RV-B12M-EtAcr  
 EXPNO 5  
 PROCNO 1

F2 - Acquisition Parameters  
 Date\_ 20190502  
 Time\_ 16.20  
 INSTRUM spect  
 PROBHD 5 mm PABBO BB/  
 PULPROG zgpg30  
 TD 65536  
 SOLVENT Acetone  
 NS 2048  
 DS 4  
 SWH 29761.904 Hz  
 FIDRES 0.454131 Hz  
 AQ 1.1010048 sec  
 RG 193.34  
 DW 16.800 usec  
 DE 6.50 usec  
 TE 296.2 K  
 D1 1.50000000 sec  
 D11 0.03000000 sec  
 TD0 1

===== CHANNEL f1 =====  
 NUC1  $^{13}\text{C}$   
 P1 10.00 usec  
 PLW1 53.00000000 W  
 SFO1 100.6228293 MHz

===== CHANNEL f2 =====  
 CPDPRG[2] waltz16  
 NUC2  $^1\text{H}$   
 PCPD2 80.00 usec  
 PLW2 12.50000000 W  
 PLW12 0.43945000 W  
 PLW13 0.28125000 W  
 SFO2 400.1316005 MHz

F2 - Processing parameters  
 SI 32768  
 SF 100.6126860 MHz  
 WDW EM  
 SSB 0  
 LB 1.00 Hz  
 GB 0  
 PC 1.40

20190501-B12M-EtAc 20 mg white solid [Et<sub>3</sub>NH][B<sub>12</sub>H<sub>10</sub>NHC(Menthyl)OCH<sub>2</sub>CH<sub>2</sub>COOEt] dissolved in 0.6 mL acetone-d<sub>6</sub>\*

<sup>13</sup>CDEPT NMR 100 MHz

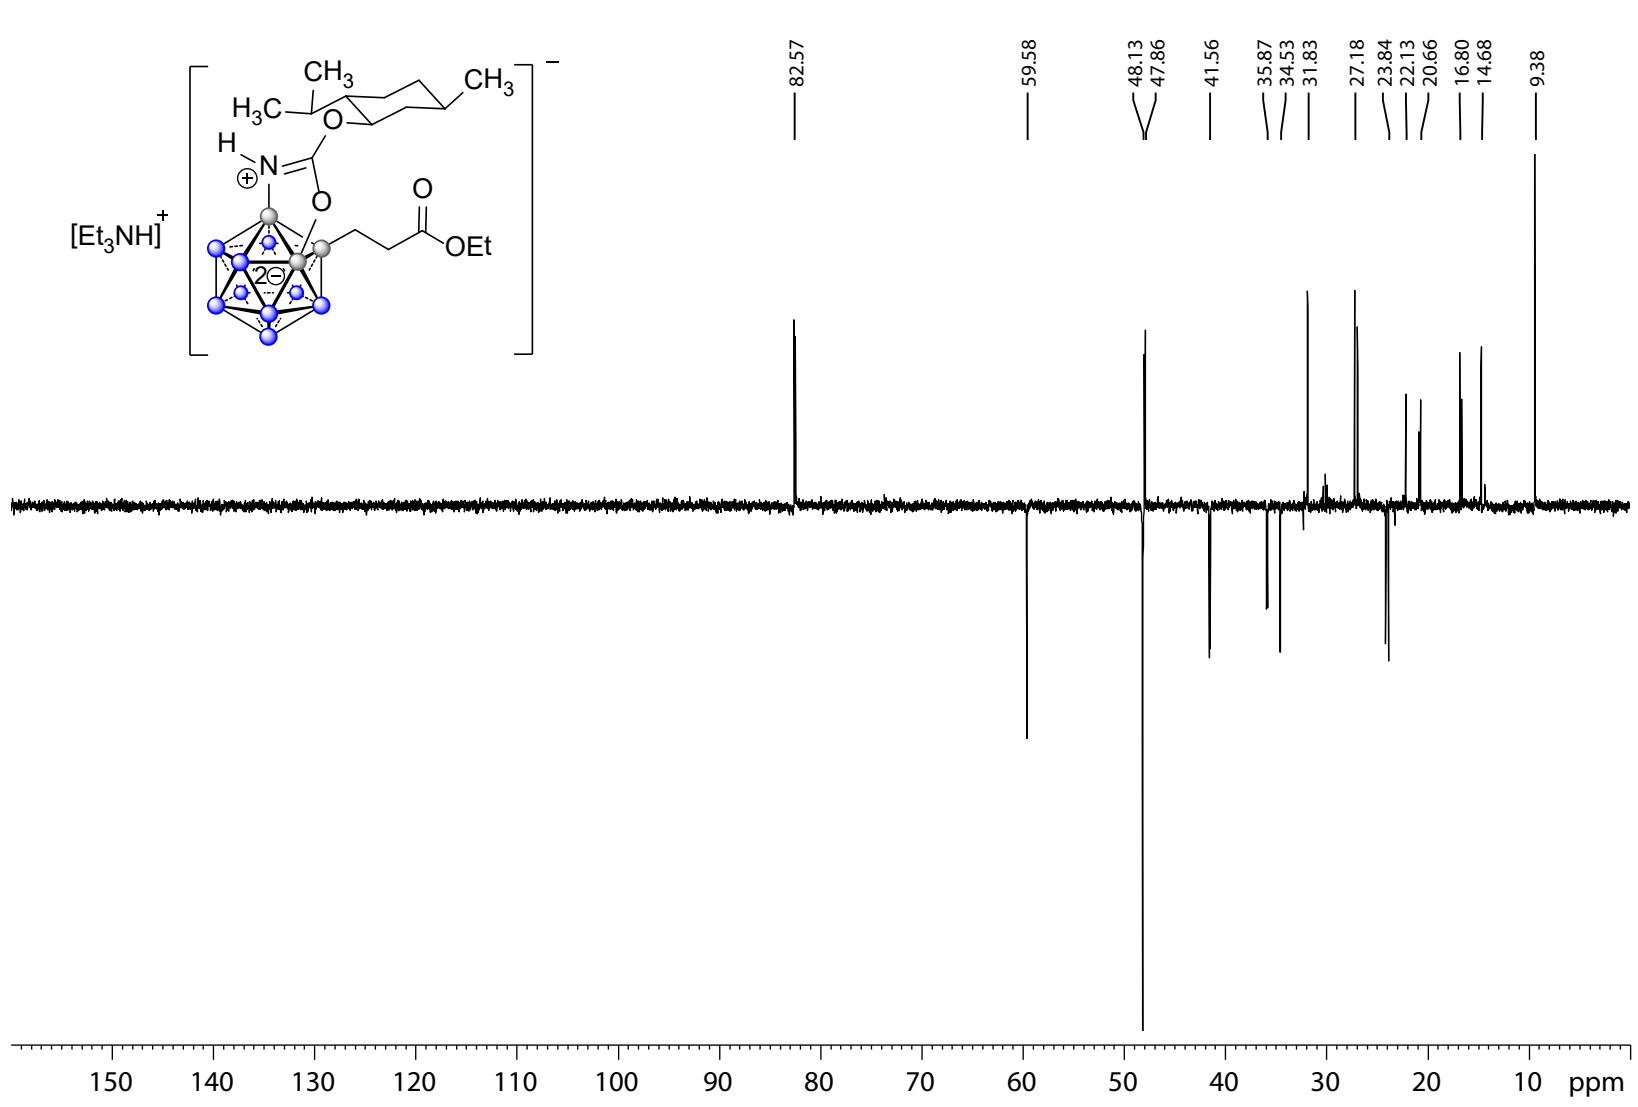

Current Data Parameters  
NAME 20190501-RV-B12M-EtHcr  
EXPNO 6  
PROCNO 1

F2 - Acquisition Parameters  
Date\_ 20190502  
Time\_ 16.48  
INSTRUM spect  
PROBHD 5 mm PABBO BB/  
PULPROG dept135  
TD 65536  
SOLVENT Acetone  
NS 512  
DS 4  
SWH 29296.875 Hz  
FIDRES 0.447035 Hz  
AQ 1.1184810 sec  
RG 193.34  
DW 17.067 usec  
DE 6.50 usec  
TE 296.1 K  
CNST2 145.0000000  
D1 2.00000000 sec  
D2 0.00344828 sec  
D12 0.00002000 sec  
TD0 1

==== CHANNEL f1 =====  
NUC1 13C  
P1 10.00 usec  
P2 20.00 usec  
PLW1 53.00000000 W  
SFO1 100.6228293 MHz

==== CHANNEL f2 =====  
CPDPRG[2] waltz16  
NUC2 1H  
P3 15.00 usec  
P4 30.00 usec  
PCPD2 80.00 usec  
PLW2 12.50000000 W  
PLW12 0.43945000 W  
SFO2 400.1316005 MHz

F2 - Processing parameters  
SI 32768  
SF 100.6126862 MHz  
WDW EM  
SSB 0  
LB 1.00 Hz  
GB 0  
PC 4.00

20190501-B12M-EtAc 20 mg white solid  $[\text{Et}_3\text{NH}][\text{B}_{12}\text{H}_{10}\text{NHC}(\text{Menthyl})\text{OCH}_2\text{CH}_2\text{COOEt}]$  dissolved in 0.6 mL acetone- $d_6^*$

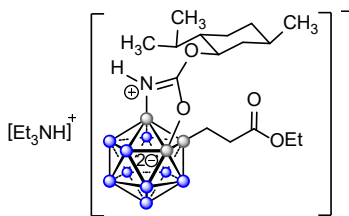

$^1\text{H} - ^1\text{H}$  COSY NMR

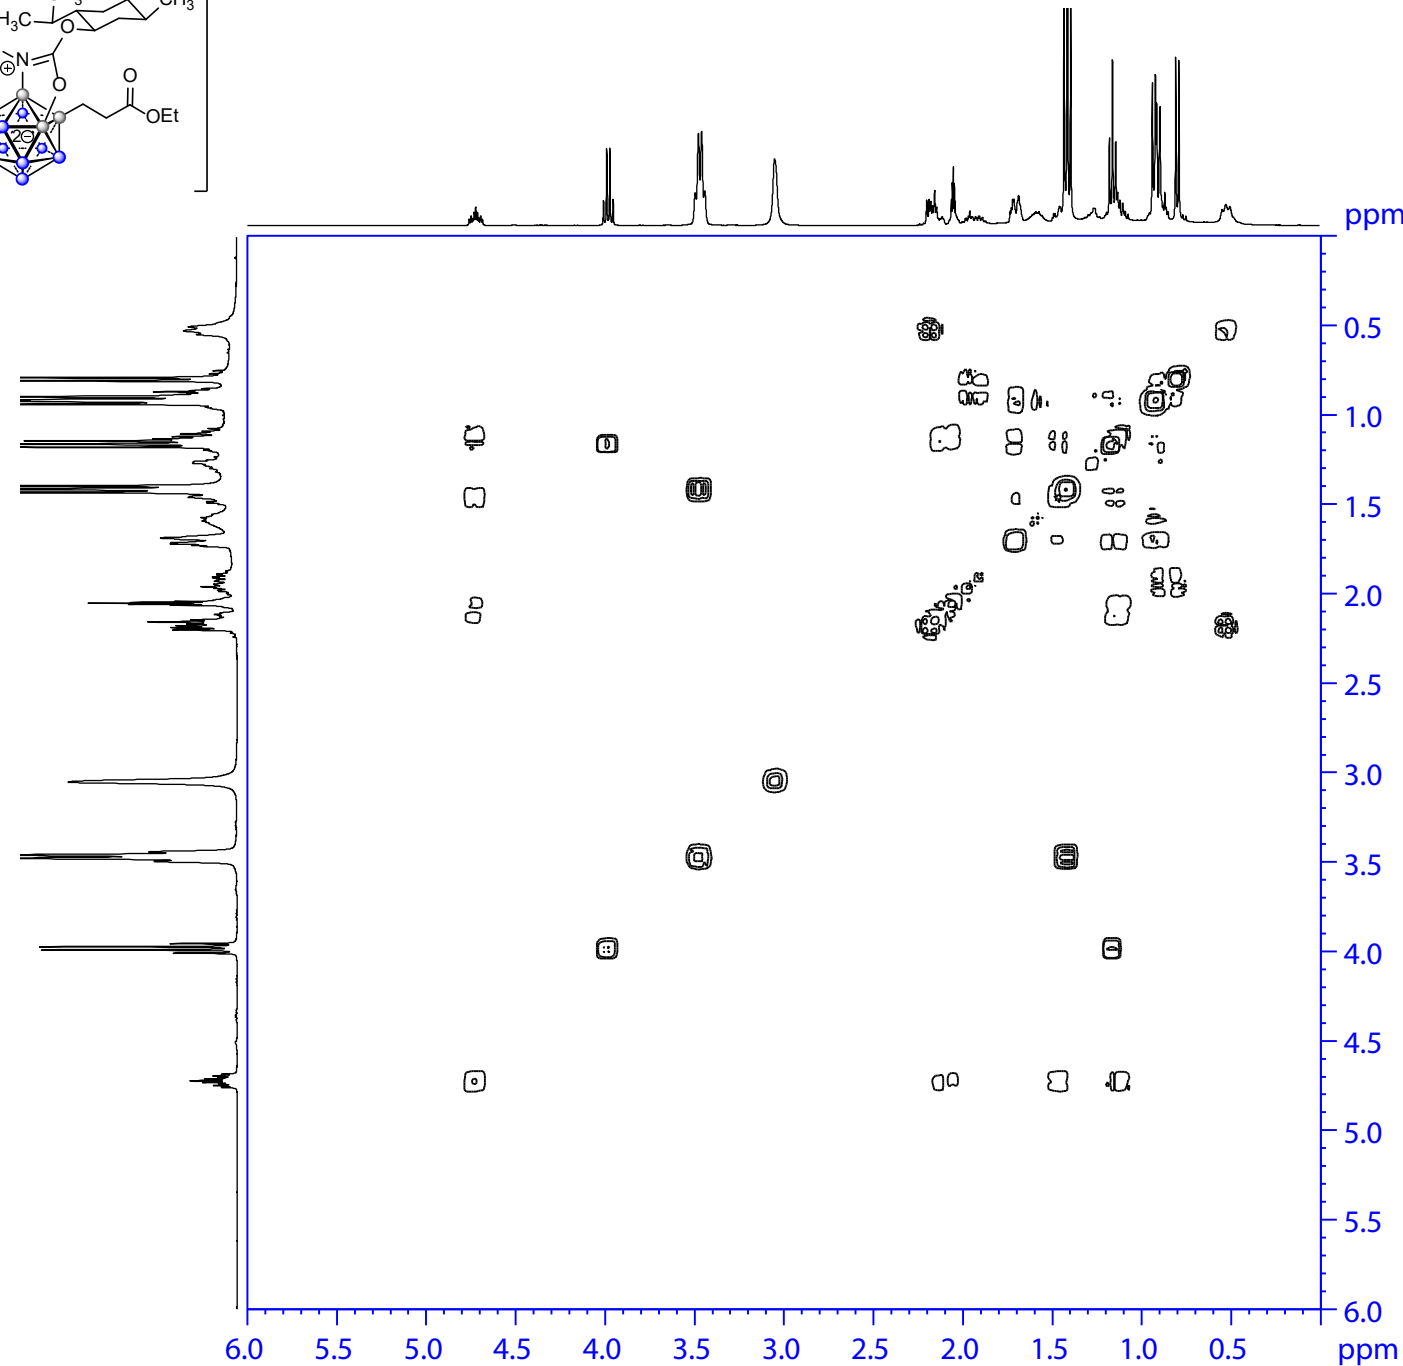

Current Data Parameters  
NAME 20190501-RV-B12M-EtAc  
EXPNO 8  
PROCNO 1

F2 - Acquisition Parameters  
Date\_ 20190502  
Time 17.04  
INSTRUM spect  
PROBHD 5 mm PABBO BB/  
PULPROG cosygpppqf  
TD 2048  
SOLVENT Acetone  
NS 2  
DS 8  
SWH 5341.880 Hz  
FIDRES 2.608340 Hz  
AQ 0.1916928 sec  
RG 64.43  
DW 93.600 usec  
DE 6.50 usec  
TE 295.0 K  
D0 0.00000300 sec  
D1 2.00000000 sec  
D11 0.03000000 sec  
D12 0.00002000 sec  
D13 0.00000400 sec  
D16 0.00020000 sec  
IN0 0.00018720 sec

==== CHANNEL f1 =====  
NUC1 1H  
P0 15.00 usec  
P1 15.00 usec  
P17 2500.00 usec  
PLW1 12.50000000 W  
PLW10 4.16050005 W  
SFO1 400.1324057 MHz

===== GRADIENT CHANNEL =====  
GPNAM[1] SMSQ10.100  
GPZ1 10.00 %  
P16 1000.00 usec

F1 - Acquisition parameters  
TD 128  
SFO1 400.1324 MHz  
FIDRES 83.466881 Hz  
SW 13.350 ppm  
FrMODE QF

F2 - Processing parameters  
SI 1024  
SF 400.1300045 MHz  
WDW QSINE  
SSB 0  
LB 0 Hz  
GB 0  
PC 1.40

F1 - Processing parameters  
SI 1024  
MC2 QF  
SF 400.1300041 MHz  
WDW QSINE  
SSB 0  
LB 0 Hz  
GB 0

<sup>1</sup>H - <sup>13</sup>C HSQC NMR

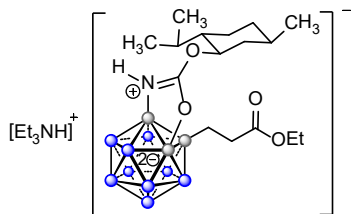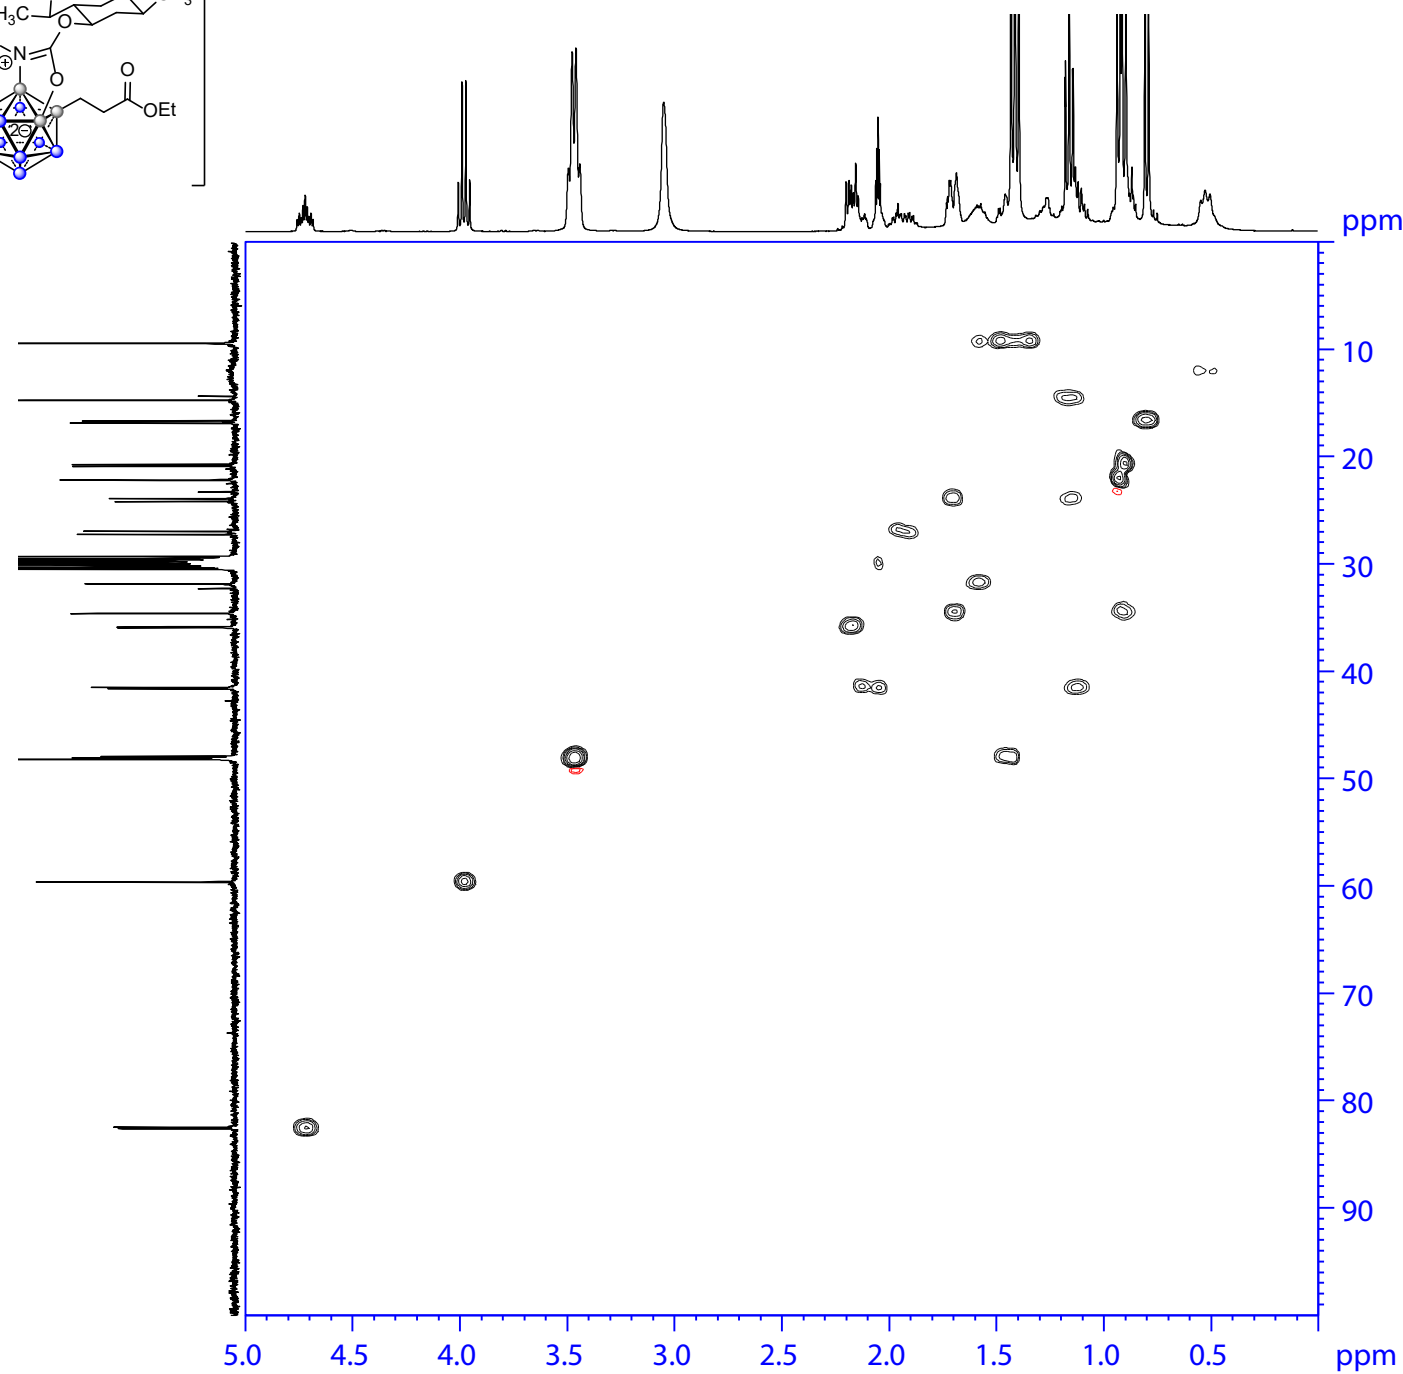

```

Current Data Parameters
NAME      20190501-RV-B12M-EtAcr
EXPNO    7
PROCNO   1

F2 - Acquisition Parameters
Date_    20190502
Time     16.50
INSTRUM  spect
PROBHD   5 mm PABBO BB/
PULPROG  hsqcetgps12
TD        1024
SOLVENT  Acetone
NS        2
DS        16
SWH       6009.615 Hz
FIDRES    5.868765 Hz
AQ        0.0851968 sec
RG        193.34
DW        83.200 usec
DE        6.50 usec
TE        295.9 K
CNST2    145.0000000
D0        0.00000300 sec
D1        1.50000000 sec
D4        0.00172414 sec
D11       0.03000000 sec
D16       0.00020000 sec
D24       0.00086207 sec
IN0       0.00001990 sec
ZGOPTNS

===== CHANNEL f1 =====
NUC1      1H
P1        15.00 usec
P2        30.00 usec
P28       1000.00 usec
PLW1     12.50000000 W
SFO1     400.1328009 MHz

===== CHANNEL f2 =====
CPDPRG2  gaxp
NUC2     13C
P3        10.00 usec
P4        20.00 usec
PCPD2    70.00 usec
PLW2     53.00000000 W
PLW12    1.08159995 W
SFO2     100.6238364 MHz

===== GRADIENT CHANNEL =====
GPNAM[1] SMSQ10.100
GPNAM[2] SMSQ10.100
GPNAM[3] SMSQ10.100
GPNAM[4] SMSQ10.100
GPZ1     80.00 %
GPZ2     20.10 %
GPZ3     11.00 %
GPZ4     -5.00 %
P16      1000.00 usec
P19      600.00 usec

F1 - Acquisition parameters
TD        256
SFO1     100.6238 MHz
FIDRES    196.524048 Hz
SW        249.991 ppm
FhMODE    Echo-Antiecho

F2 - Processing parameters
SI        1024
SF        400.1300054 MHz
WDW       QSINE
SSB       2
LB        0 Hz
GB        0
PC        1.40

F1 - Processing parameters
SI        1024
MC2       echo-antiecho
SF        100.6126811 MHz
WDW       QSINE
SSB       2
LB        0 Hz
GB        0
    
```

20190607-B12M-tBuAc 20 mg white solid  $[\text{Et}_3\text{NH}][\text{B}_{12}\text{H}_{10}\text{NHC}(\text{Menthyl})\text{OCH}_2\text{CH}_2\text{COOtBu}]$  dissolved in 0.6 mL acetone- $d_6^*$

400MHz  $^1\text{H}$  NMR,  $\circ$  deuterated solvent residual peak = 2.05 ppm;  $\diamond$  water peak

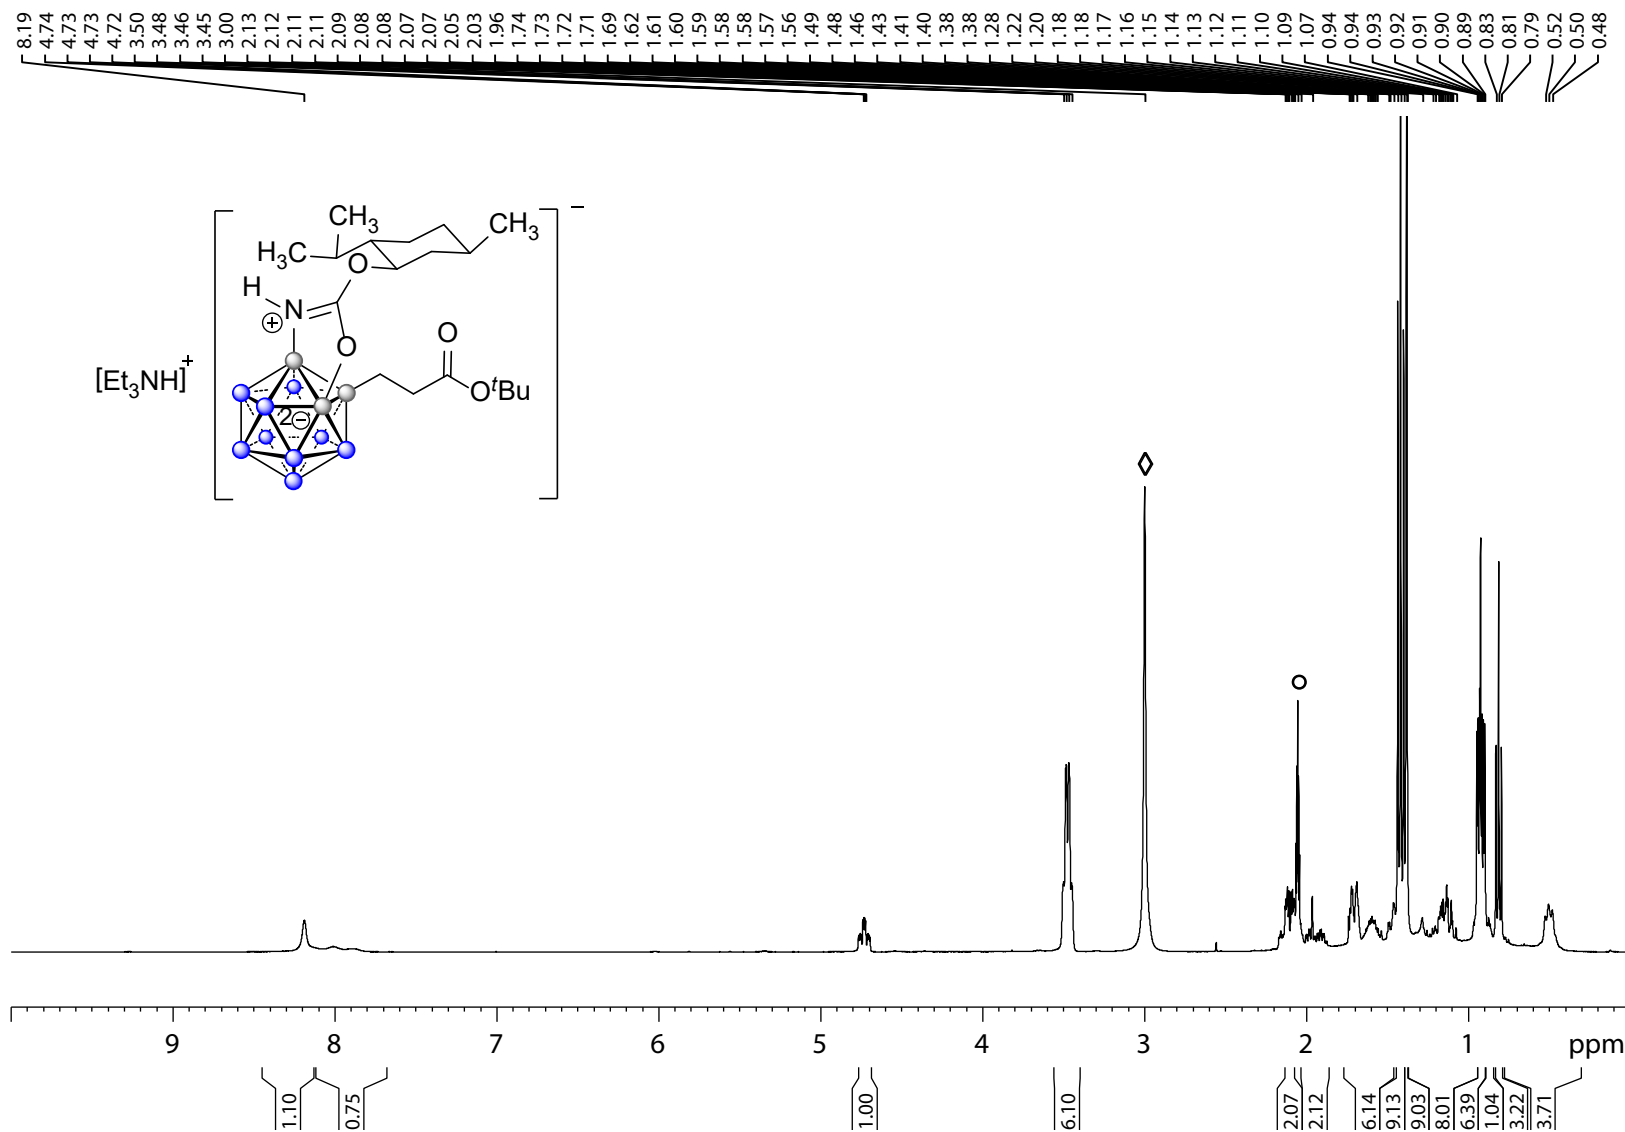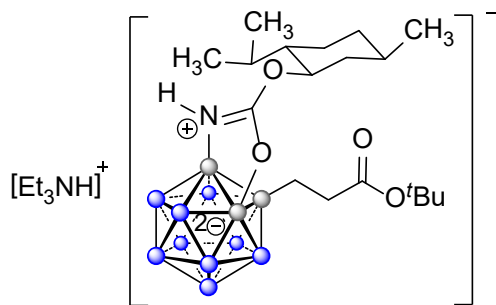

Current Data Parameters  
 NAME 20190607-RV-B12M-tBuAcry  
 EXPNO 1  
 PROCNO 1

F2 - Acquisition Parameters  
 Date\_ 20190608  
 Time\_ 5.43  
 INSTRUM spect  
 PROBHD 5 mm PABBO BB/  
 PULPROG zg30  
 TD 65536  
 SOLVENT Acetone  
 NS 16  
 DS 2  
 SWH 10000.000 Hz  
 FIDRES 0.152588 Hz  
 AQ 3.276799 sec  
 RG 78.69  
 DW 50.000 usec  
 DE 6.50 usec  
 TE 293.3 K  
 D1 1.00000000 sec  
 TD0 1

===== CHANNEL f1 =====  
 NUC1 1H  
 P1 15.00 usec  
 PLW1 12.50000000 W  
 SFO1 400.1328009 MHz

F2 - Processing parameters  
 SI 65536  
 SF 400.1300071 MHz  
 WDW EM  
 SSB 0  
 LB 0.30 Hz  
 GB 0  
 PC 1.00



20190607-B12M-tBuAcr 20 mg white solid [Et<sub>3</sub>NH][B<sub>12</sub>H<sub>10</sub>NHC(Menthyl)OCH<sub>2</sub>CH<sub>2</sub>COOtBu] dissolved in 0.6 mL acetone-d<sub>6</sub>\*

400MHz <sup>1</sup>H{B} NMR, ◊ deuterated solvent residual peak= 2.05 ppm; ○ water peak

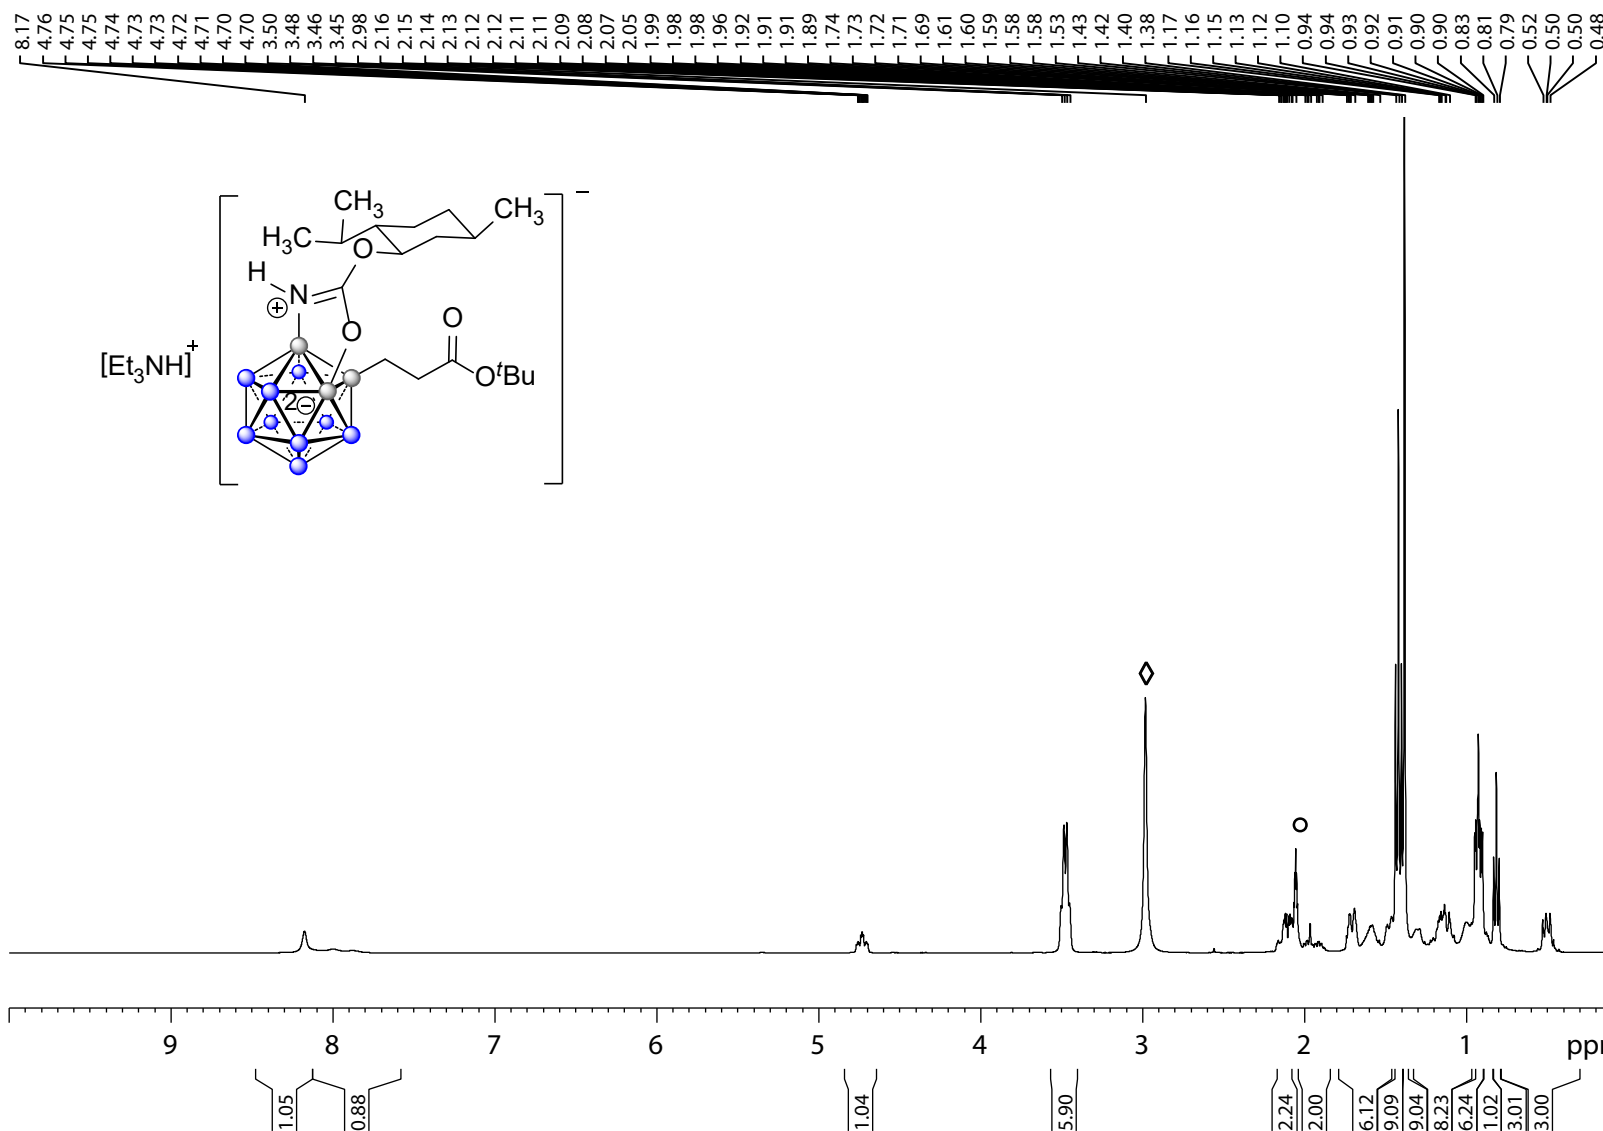

Current Data Parameters  
 NAME 20190607-RV-B12M-tBuAcry  
 EXPNO 2  
 PROCNO 1

F2 - Acquisition Parameters  
 Date\_ 20190608  
 Time\_ 5.46  
 INSTRUM spect  
 PROBHD 5 mm PABBO BB/  
 PULPROG zgig30  
 TD 16384  
 SOLVENT Acetone  
 NS 16  
 DS 4  
 SWH 8012.820 Hz  
 FIDRES 0.489064 Hz  
 AQ 1.0223616 sec  
 RG 78.69  
 DW 62.400 usec  
 DE 6.50 usec  
 TE 293.8 K  
 D1 1.00000000 sec  
 D11 0.03000000 sec  
 TD0 1

==== CHANNEL f1 =====  
 NUC1 1H  
 P1 15.00 usec  
 PLW1 12.50000000 W  
 SFO1 400.1320007 MHz

==== CHANNEL f2 =====  
 CPDPRG[2] garp4  
 NUC2 11B  
 PCPD2 90.00 usec  
 PLW2 52.96599960 W  
 PLW12 0.64477998 W  
 SFO2 128.3776050 MHz

F2 - Processing parameters  
 SI 32768  
 SF 400.1300072 MHz  
 WDW EM  
 SSB 0  
 LB 1.00 Hz  
 GB 0  
 PC 1.40

20190607-B12M-tBuAcr 20 mg white solid  $[\text{Et}_3\text{NH}][\text{B}_{12}\text{H}_{10}\text{NHC}(\text{Menthyl})\text{OCH}_2\text{CH}_2\text{COOtBu}]$  dissolved in 0.6 mL acetone- $d_6^*$

$^{11}\text{B}$  NMR 128 MHz

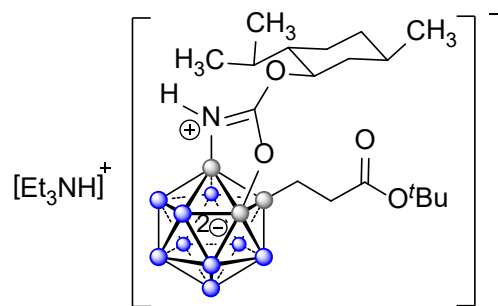

5.39  
-4.56  
-9.03  
-14.51  
-15.54  
-18.46  
-19.44  
-20.54  
-21.47

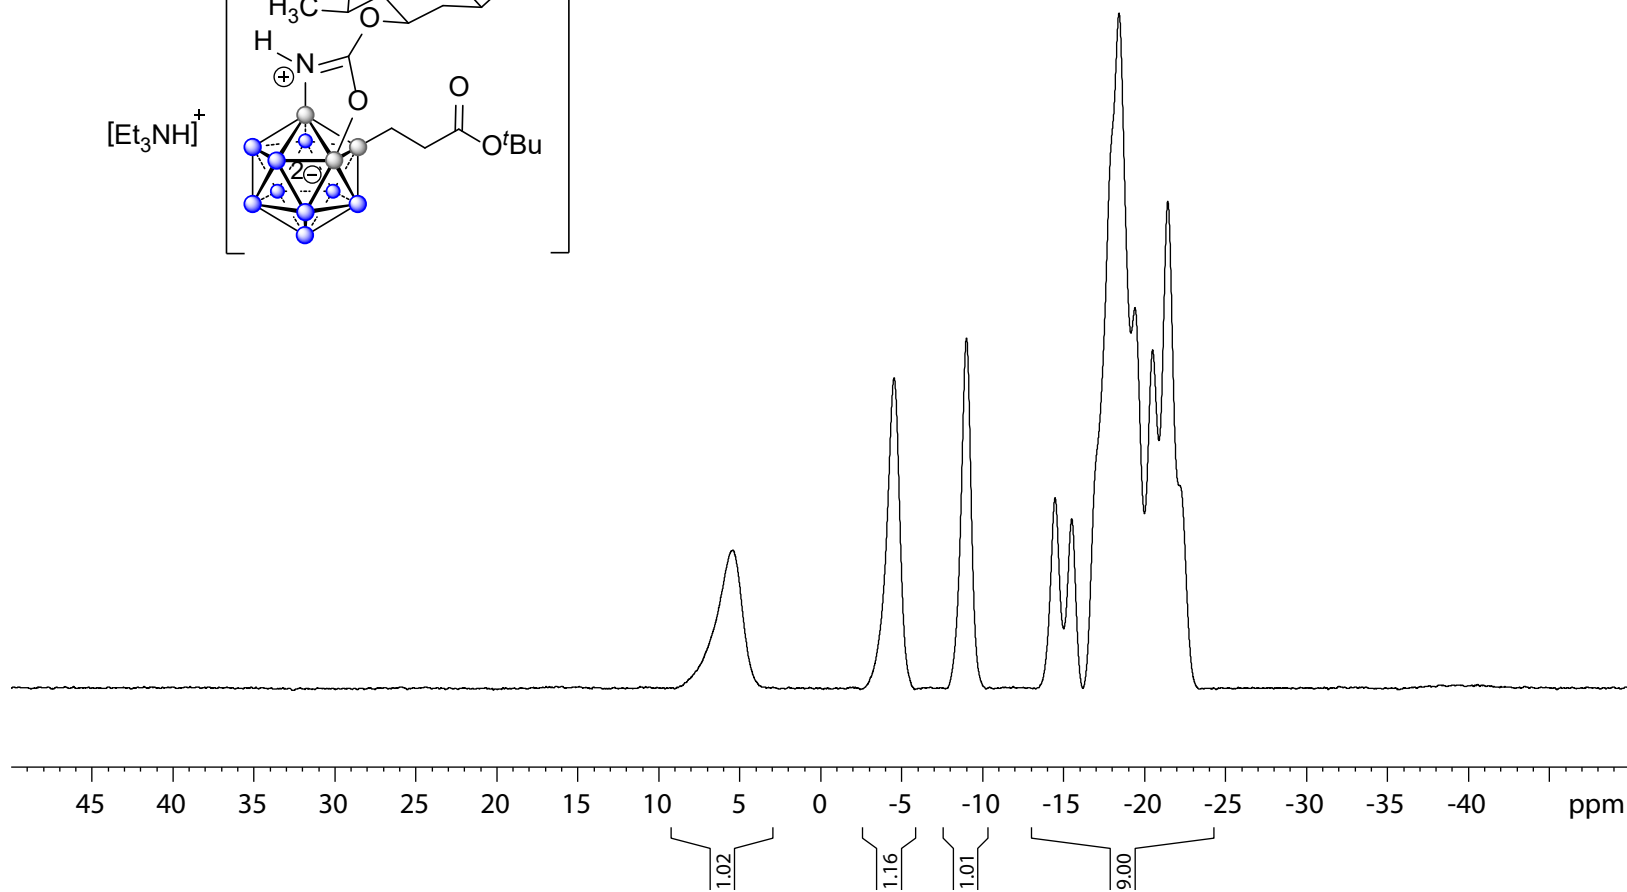

Current Data Parameters  
NAME 20190607-RV-B12M-tBuAcry  
EXPNO 3  
PROCNO 1

F2 - Acquisition Parameters  
Date\_ 20190608  
Time\_ 5.52  
INSTRUM spect  
PROBHD 5 mm PABBO BB/  
PULPROG zg  
TD 65536  
SOLVENT Acetone  
NS 128  
DS 4  
SWH 25510.203 Hz  
FIDRES 0.389255 Hz  
AQ 1.2845056 sec  
RG 193.34  
DW 19.600 usec  
DE 6.50 usec  
TE 293.3 K  
D1 1.00000000 sec  
TD0 1

===== CHANNEL f1 =====  
NUC1 11B  
P1 9.93 usec  
PLW1 52.96599960 W  
SFO1 128.3776052 MHz

F2 - Processing parameters  
SI 32768  
SF 128.3776050 MHz  
WDW EM  
SSB 0  
LB 10.00 Hz  
GB 0  
PC 1.40

20190607-B12M-tBuAcr 20 mg white solid  $[\text{Et}_3\text{NH}][\text{B}_{12}\text{H}_{10}\text{NHC}(\text{Menthyl})\text{OCH}_2\text{CH}_2\text{COOtBu}]$  dissolved in 0.6 mL acetone- $d_6^*$

$^{11}\text{B}\{^1\text{H}\}$  NMR 128 MHz

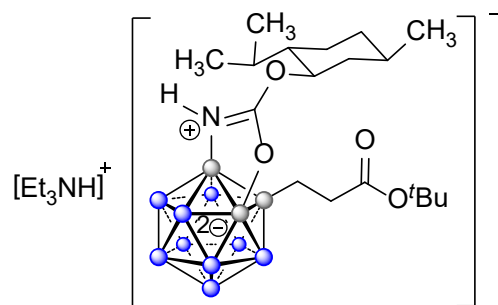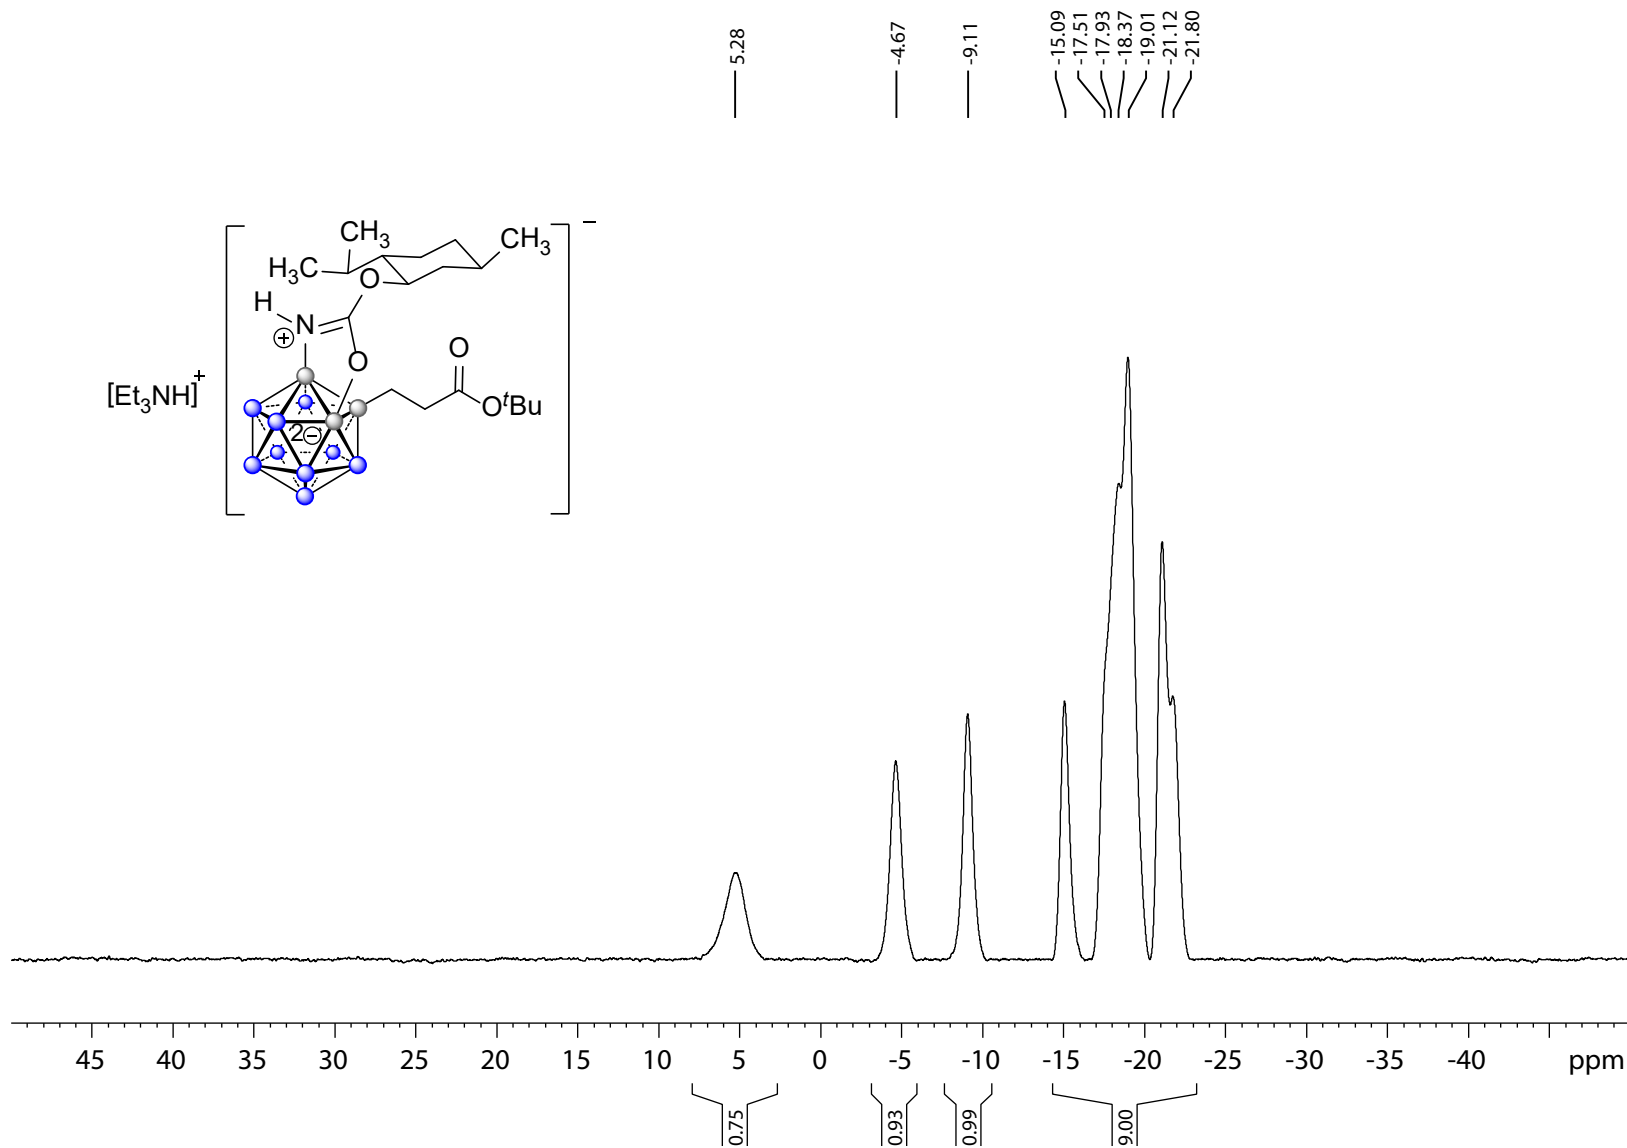

Current Data Parameters  
 NAME 20190607-RV-B12M-tBuAcry  
 EXPNO 4  
 PROCNO 1

F2 - Acquisition Parameters  
 Date\_ 20190608  
 Time\_ 5.58  
 INSTRUM spect  
 PROBHD 5 mm PABBO BB/  
 PULPROG zgpg30  
 TD 65536  
 SOLVENT Acetone  
 NS 128  
 DS 4  
 SWH 25510.203 Hz  
 FIDRES 0.389255 Hz  
 AQ 1.2845056 sec  
 RG 193.34  
 DW 19.600 usec  
 DE 6.50 usec  
 TE 294.3 K  
 D1 1.00000000 sec  
 D11 0.03000000 sec  
 TD0 1

===== CHANNEL f1 =====  
 NUC1 11B  
 P1 9.93 usec  
 PLW1 52.96599960 W  
 SFO1 128.3776050 MHz

===== CHANNEL f2 =====  
 CPDPRG[2] waltz16  
 NUC2 1H  
 PCPD2 80.00 usec  
 PLW2 12.50000000 W  
 PLW12 0.43945000 W  
 PLW13 0.28125000 W  
 SFO2 400.1320007 MHz

F2 - Processing parameters  
 SI 32768  
 SF 128.3776050 MHz  
 WDW EM  
 SSB 0  
 LB 10.00 Hz  
 GB 0  
 PC 1.40

20190607-B12M-tBuAcr 20 mg white solid [Et<sub>3</sub>NH][B<sub>12</sub>H<sub>10</sub>NHC(Menthyl)OCH<sub>2</sub>CH<sub>2</sub>COOtBu] dissolved in 0.6 mL acetone-*d*<sub>6</sub>\*

<sup>13</sup>C{<sup>1</sup>H} NMR 100 MHz

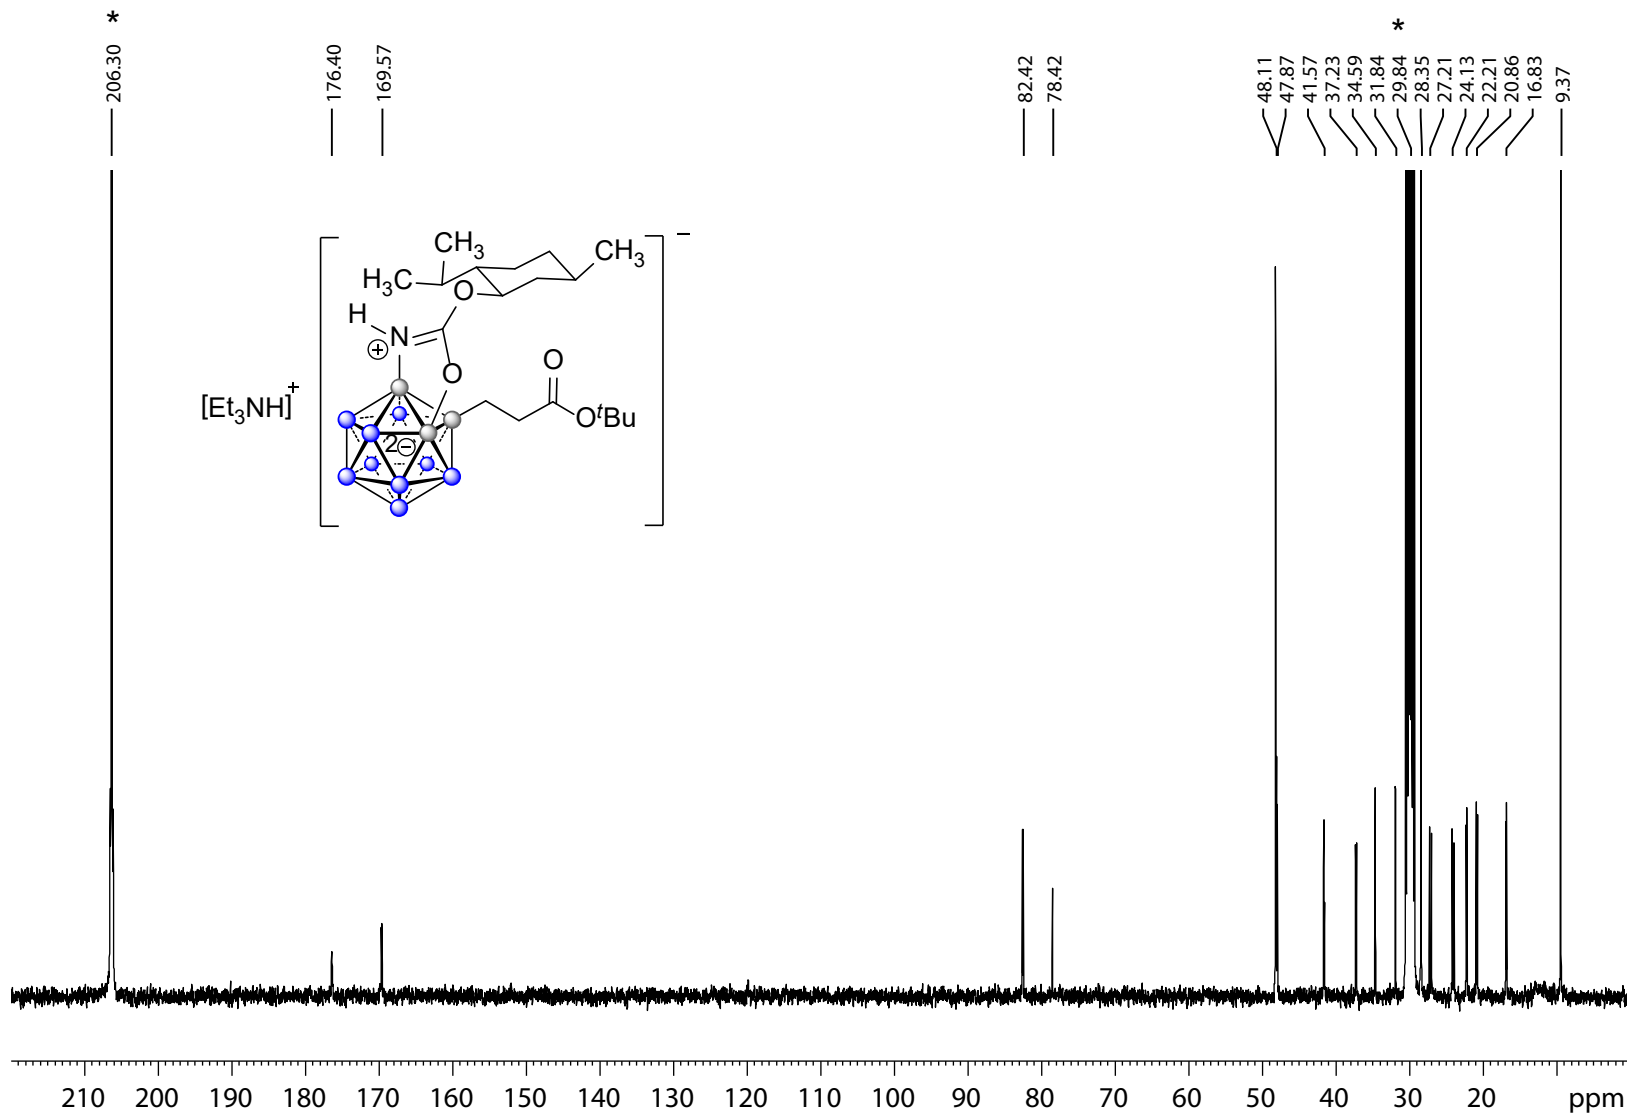

Current Data Parameters  
 NAME 20190607-RV-B12M-tBuAcry  
 EXPNO 5  
 PROCNO 1

F2 - Acquisition Parameters  
 Date\_ 20190608  
 Time\_ 7.30  
 INSTRUM spect  
 PROBHD 5 mm PABBO BB/  
 PULPROG zgpg30  
 TD 65536  
 SOLVENT Acetone  
 NS 2048  
 DS 4  
 SWH 29761.904 Hz  
 FIDRES 0.454131 Hz  
 AQ 1.1010048 sec  
 RG 193.34  
 DW 16.800 usec  
 DE 6.50 usec  
 TE 294.4 K  
 D1 1.50000000 sec  
 D11 0.03000000 sec  
 TD0 1

==== CHANNEL f1 =====  
 NUC1 13C  
 P1 10.00 usec  
 PLW1 53.00000000 W  
 SFO1 100.6228293 MHz

==== CHANNEL f2 =====  
 CPDPRG[2] waltz16  
 NUC2 1H  
 PCPD2 80.00 usec  
 PLW2 12.50000000 W  
 PLW12 0.43945000 W  
 PLW13 0.28125000 W  
 SFO2 400.1316005 MHz

F2 - Processing parameters  
 SI 32768  
 SF 100.6126841 MHz  
 WDW EM  
 SSB 0  
 LB 2.00 Hz  
 GB 0  
 PC 1.40

20190607-B12M-tBuAcr 20 mg white solid  $[\text{Et}_3\text{NH}][\text{B}_{12}\text{H}_{10}\text{NHC}(\text{Menthyl})\text{OCH}_2\text{CH}_2\text{COOtBu}]$  dissolved in 0.6 mL acetone- $d_6^*$

$^{13}\text{C}$ DEPT NMR 100 MHz

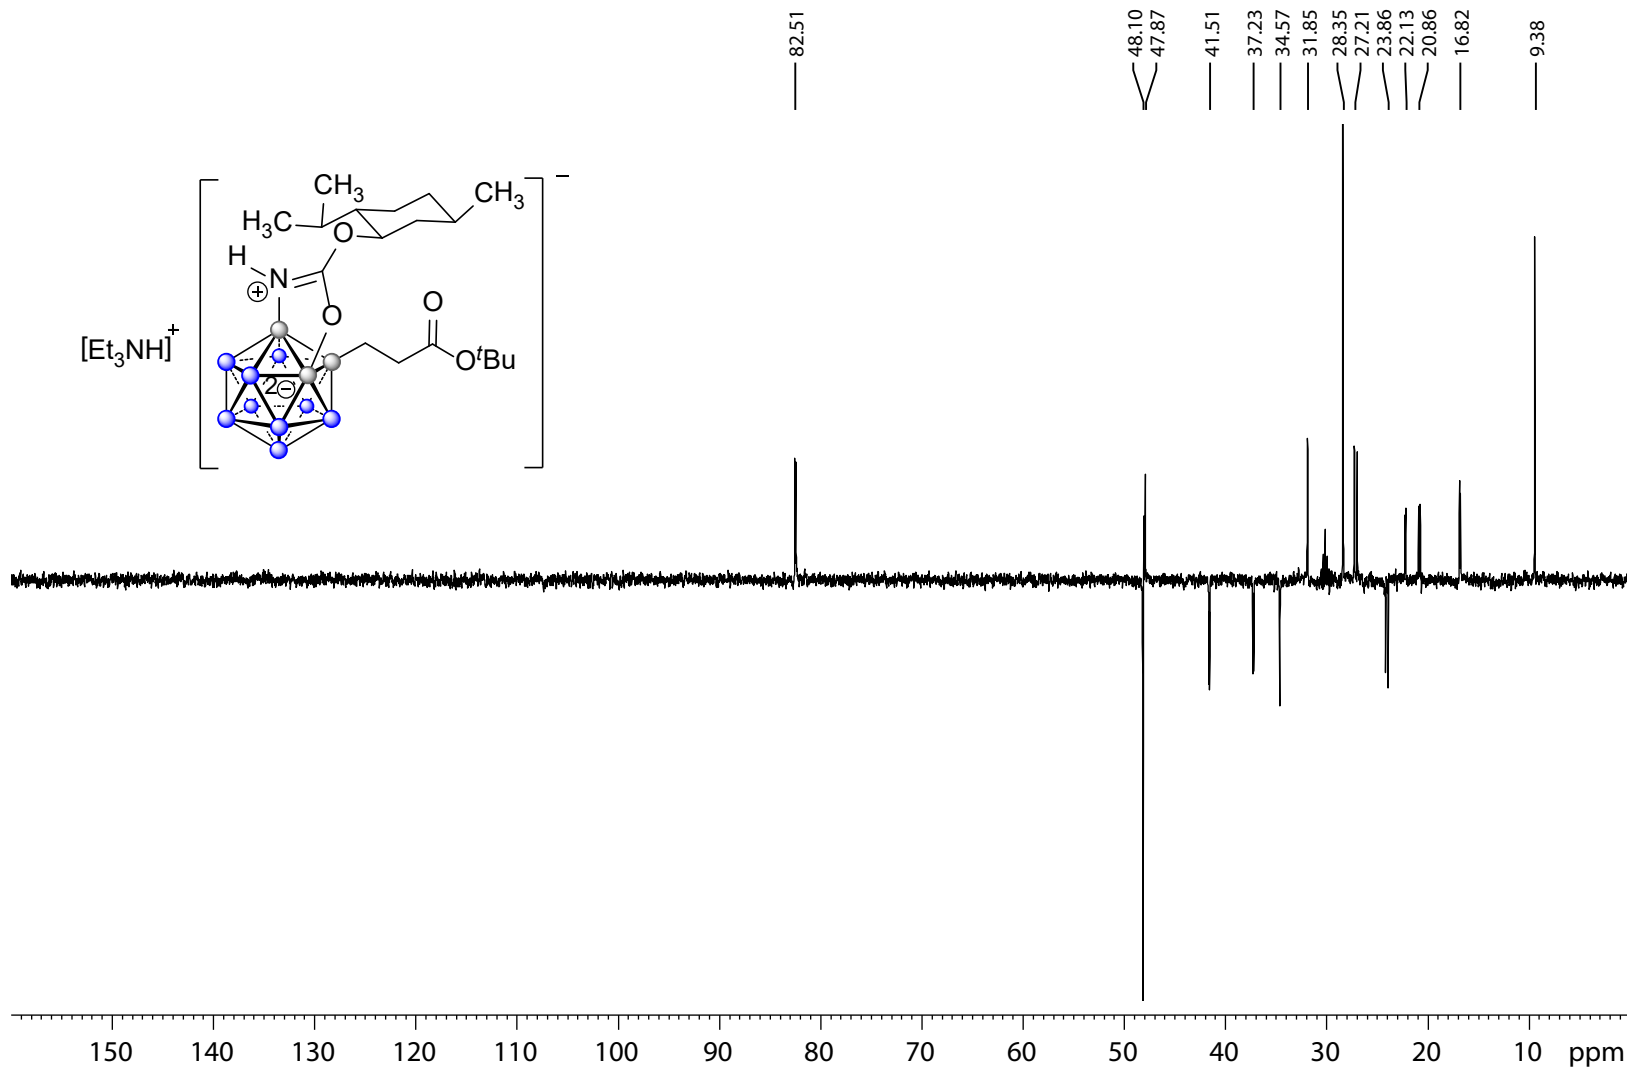

Current Data Parameters  
 NAME 20190607-RV-B12M-tBuAcry  
 EXPNO 6  
 PROCNO 1

F2 - Acquisition Parameters  
 Date\_ 20190608  
 Time\_ 7.59  
 INSTRUM spect  
 PROBHD 5 mm PABBO BB/  
 PULPROG dept135  
 TD 65536  
 SOLVENT Acetone  
 NS 512  
 DS 4  
 SWH 29296.875 Hz  
 FIDRES 0.447035 Hz  
 AQ 1.1184810 sec  
 RG 193.34  
 DW 17.067 usec  
 DE 6.50 usec  
 TE 293.6 K  
 CNST2 145.0000000  
 D1 2.00000000 sec  
 D2 0.00344828 sec  
 D12 0.00002000 sec  
 TD0 1

==== CHANNEL f1 =====  
 NUC1 13C  
 P1 10.00 usec  
 P2 20.00 usec  
 PLW1 53.00000000 W  
 SFO1 100.6228293 MHz

==== CHANNEL f2 =====  
 CPDPRG[2] waltz16  
 NUC2 1H  
 P3 15.00 usec  
 P4 30.00 usec  
 PCPD2 80.00 usec  
 PLW2 12.50000000 W  
 PLW12 0.43945000 W  
 SFO2 400.1316005 MHz

F2 - Processing parameters  
 SI 32768  
 SF 100.6126839 MHz  
 WDW EM  
 SSB 0  
 LB 2.00 Hz  
 GB 0  
 PC 4.00

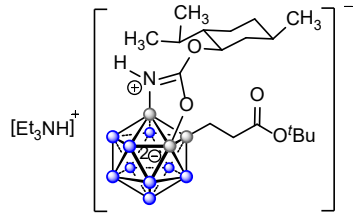

<sup>1</sup>H - <sup>1</sup>H COSY NMR

Current Data Parameters  
 NAME 20190607-RV-B12M-tBuAcry  
 EXPNO 8  
 PROCNO 1

F2 - Acquisition Parameters  
 Date\_ 20190608  
 Time\_ 8.15  
 INSTRUM spect  
 PROBHD 5 mm PABBO BB/  
 PULPROG cosygpppqf  
 TD 2048  
 SOLVENT Acetone  
 NS 2  
 DS 8  
 SWH 5341.880 Hz  
 FIDRES 2.608340 Hz  
 AQ 0.1916928 sec  
 RG 138.32  
 DW 93.600 usec  
 DE 6.50 usec  
 TE 293.7 K  
 D0 0.0000300 sec  
 D1 2.0000000 sec  
 D11 0.0300000 sec  
 D12 0.0000200 sec  
 D13 0.0000400 sec  
 D16 0.0002000 sec  
 IN0 0.00018720 sec

===== CHANNEL f1 =====  
 NUC1 1H  
 P0 15.00 usec  
 P1 15.00 usec  
 P17 2500.00 usec  
 PLW1 12.5000000 W  
 PLW10 4.16050005 W  
 SFO1 400.1324057 MHz

===== GRADIENT CHANNEL =====  
 GPNAM[1] SMSQ10.100  
 GPZ1 10.00 %  
 P16 1000.00 usec

F1 - Acquisition parameters  
 TD 128  
 SFO1 400.1324 MHz  
 FIDRES 83.466881 Hz  
 SW 13.350 ppm  
 FhMODE QF

F2 - Processing parameters  
 SI 1024  
 SF 400.1300077 MHz  
 WDW QSINE  
 SSB 0  
 LB 0 Hz  
 GB 0  
 PC 1.40

F1 - Processing parameters  
 SI 1024  
 MC2 QF  
 SF 400.1300077 MHz  
 WDW QSINE  
 SSB 0  
 LB 0 Hz  
 GB 0

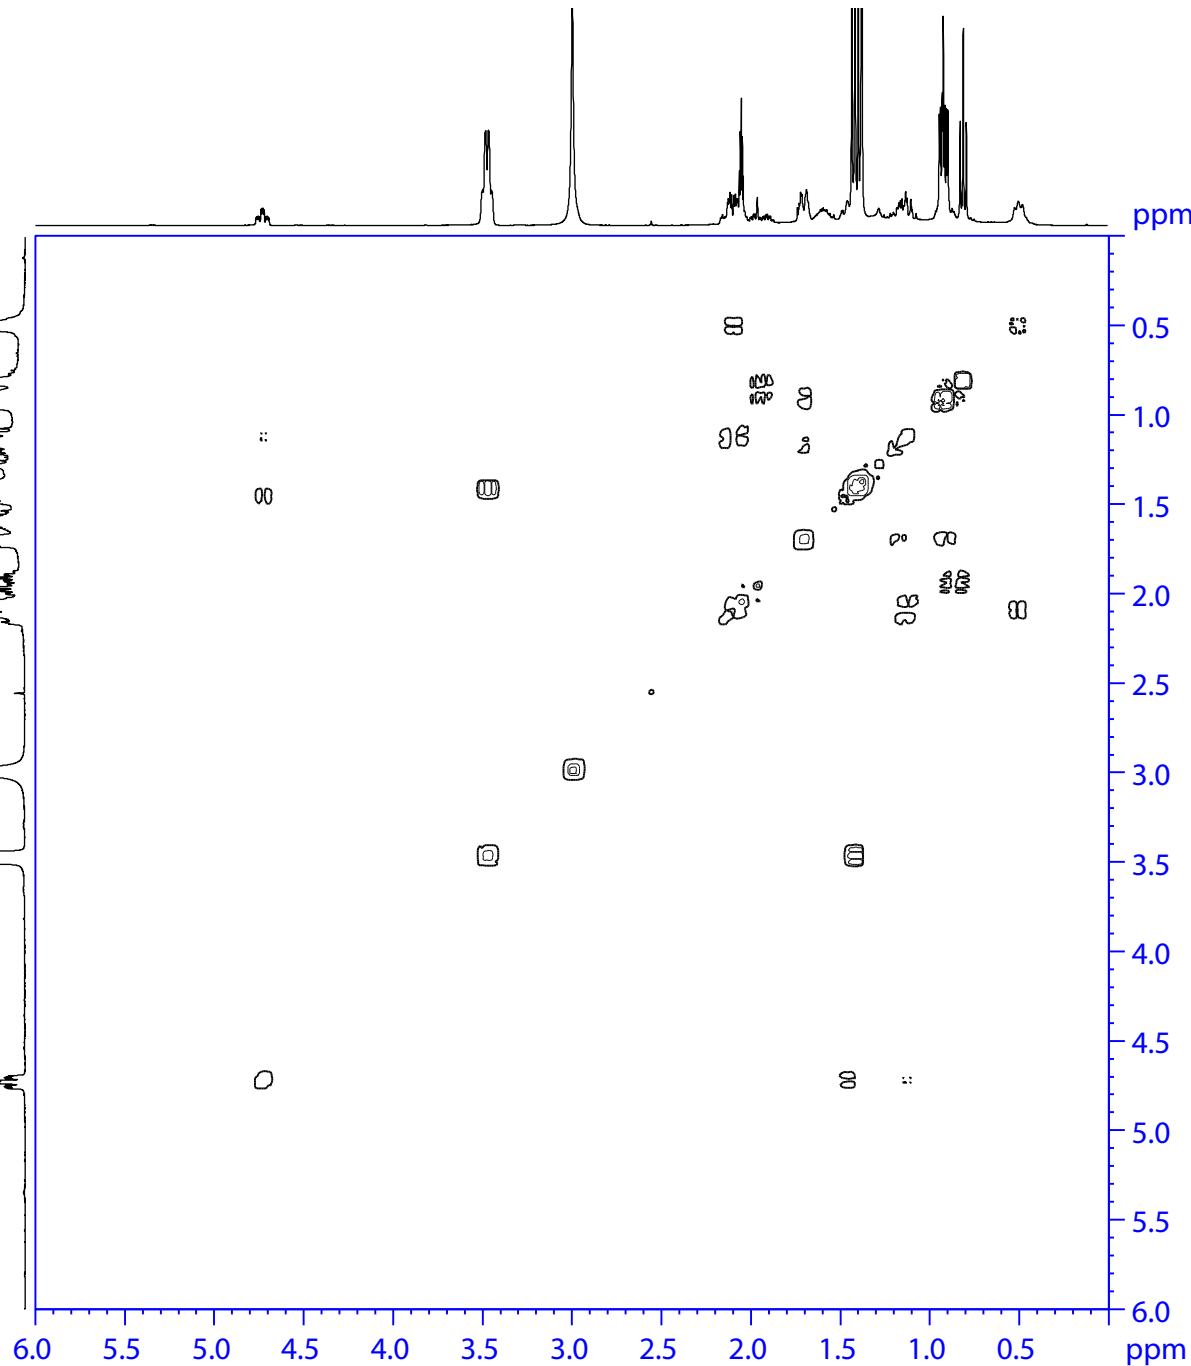

20190607-B12M-tBuAcr 20 mg white solid [Et<sub>3</sub>NH][B<sub>12</sub>H<sub>10</sub>NHC(Menthyl)OCH<sub>2</sub>CH<sub>2</sub>COOtBu] dissolved in 0.6 mL acetone-d<sub>6</sub>\*

<sup>1</sup>H - <sup>13</sup>C HSQC NMR

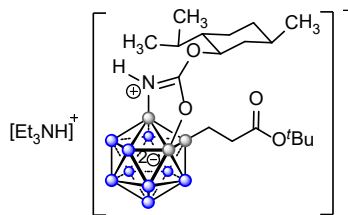

Current Data Parameters  
NAME 20190607-RV-B12M-tBuAcry  
EXPNO 7  
PROCNO 1

F2 - Acquisition Parameters  
Date\_ 20190608  
Time 8.00  
INSTRUM spect  
PROBHD 5 mm PABBO BB/  
PULPROG hsqcetgps12  
TD 1024  
SOLVENT Acetone  
NS 2  
DS 16  
SWH 6009.615 Hz  
FIDRES 5.868765 Hz  
AQ 0.0851968 sec  
RG 193.34  
DW 83.200 usec  
DE 6.50 usec  
TE 293.5 K  
CNST2 145.0000000  
D0 0.0000300 sec  
D1 1.5000000 sec  
D4 0.00172414 sec  
D11 0.0300000 sec  
D16 0.0002000 sec  
D24 0.00086207 sec  
IN0 0.00001990 sec  
ZGPTNS

===== CHANNEL f1 =====  
NUC1 1H  
P1 15.00 usec  
P2 30.00 usec  
P28 1000.00 usec  
PLW1 12.50000000 W  
SFO1 400.1328009 MHz

===== CHANNEL f2 =====  
CPDPRG2 gapp  
NUC2 13C  
P3 10.00 usec  
P4 20.00 usec  
PCPD2 70.00 usec  
PLW2 53.00000000 W  
PLW12 1.08159995 W  
SFO2 100.6238364 MHz

===== GRADIENT CHANNEL =====  
GPNAM[1] SMSQ10.100  
GPNAM[2] SMSQ10.100  
GPNAM[3] SMSQ10.100  
GPNAM[4] SMSQ10.100  
GPZ1 80.00 %  
GPZ2 20.10 %  
GPZ3 11.00 %  
GPZ4 -5.00 %  
P16 1000.00 usec  
P19 600.00 usec

F1 - Acquisition parameters  
TD 256  
SFO1 100.6238 MHz  
FIDRES 196.524048 Hz  
SW 249.991 ppm  
FhMODE Echo-Antiecho

F2 - Processing parameters  
SI 1024  
SF 400.1300052 MHz  
WDW QSINE  
SSB 2  
LB 0 Hz  
GB 0  
PC 1.40

F1 - Processing parameters  
SI 1024  
MC2 echo-antiecho  
SF 100.6126833 MHz  
WDW QSINE  
SSB 2  
LB 0 Hz  
GB 0

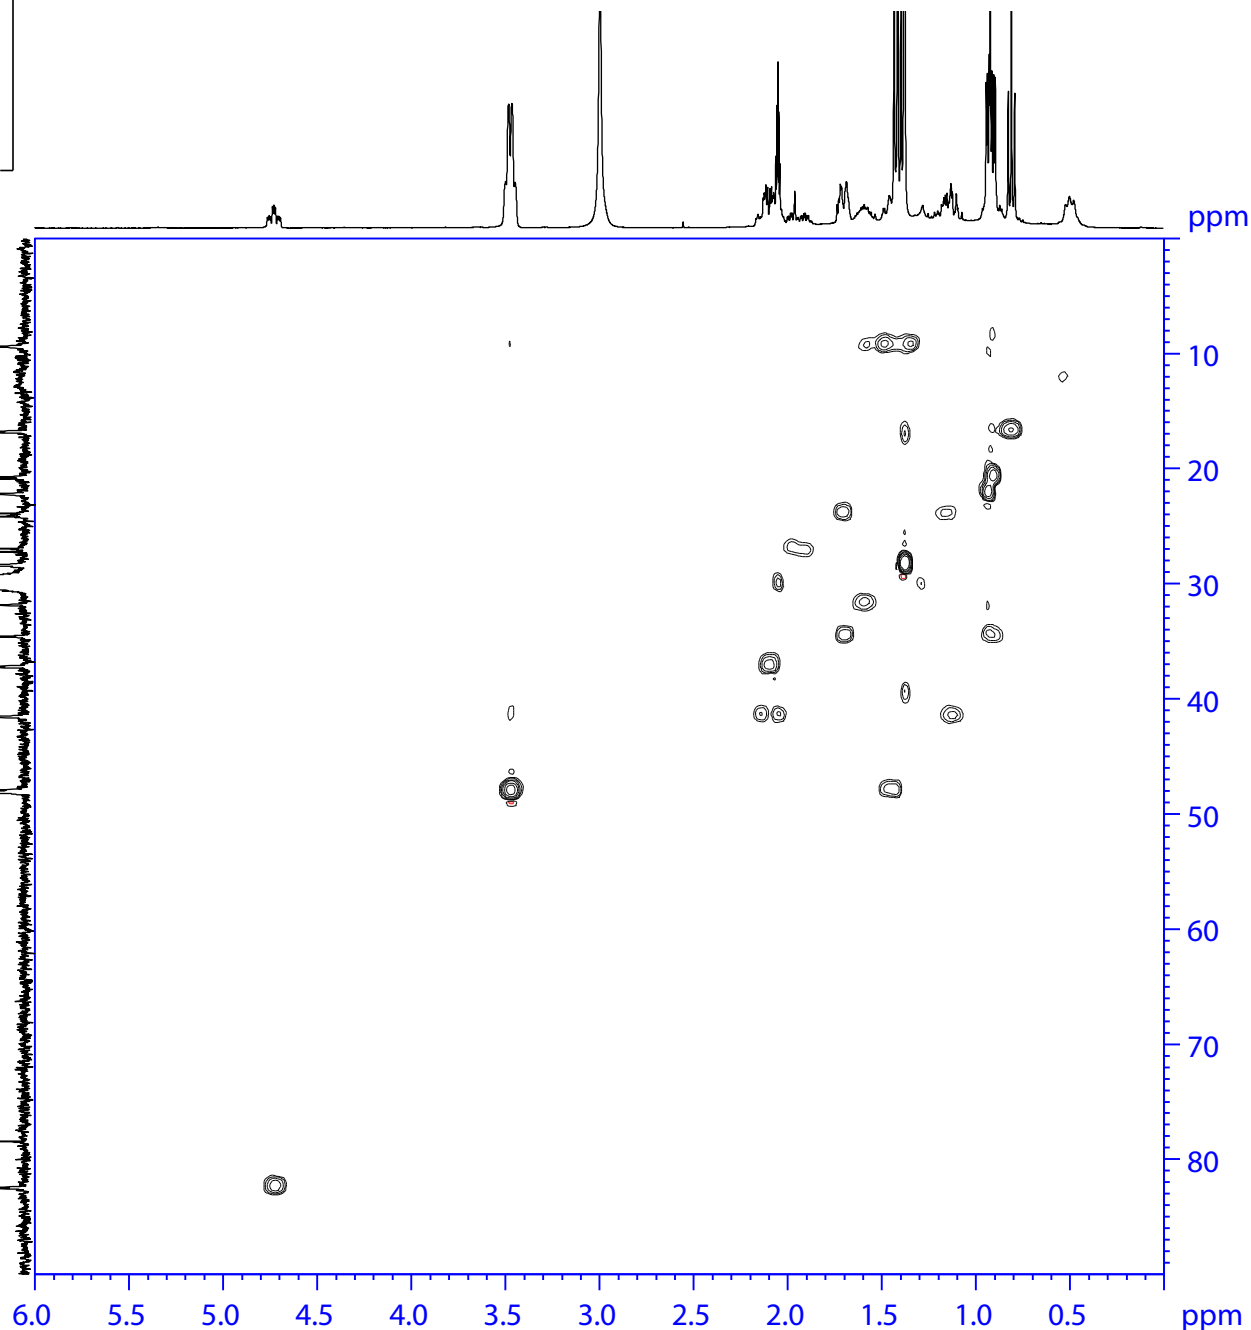

20190507-B12M-Dodecane 20 mg white solid  $[\text{Et}_3\text{NH}][\text{B}_{12}\text{H}_{10}\text{NHC}(\text{Menthyl})\text{OC}_{10}\text{H}_{21}]$  dissolved in 0.6 mL acetone- $d_6^*$

400MHz  $^1\text{H}$  NMR,  $\circ$  deuterated solvent residual peak= 2.05 ppm;  $\diamond$  water peak

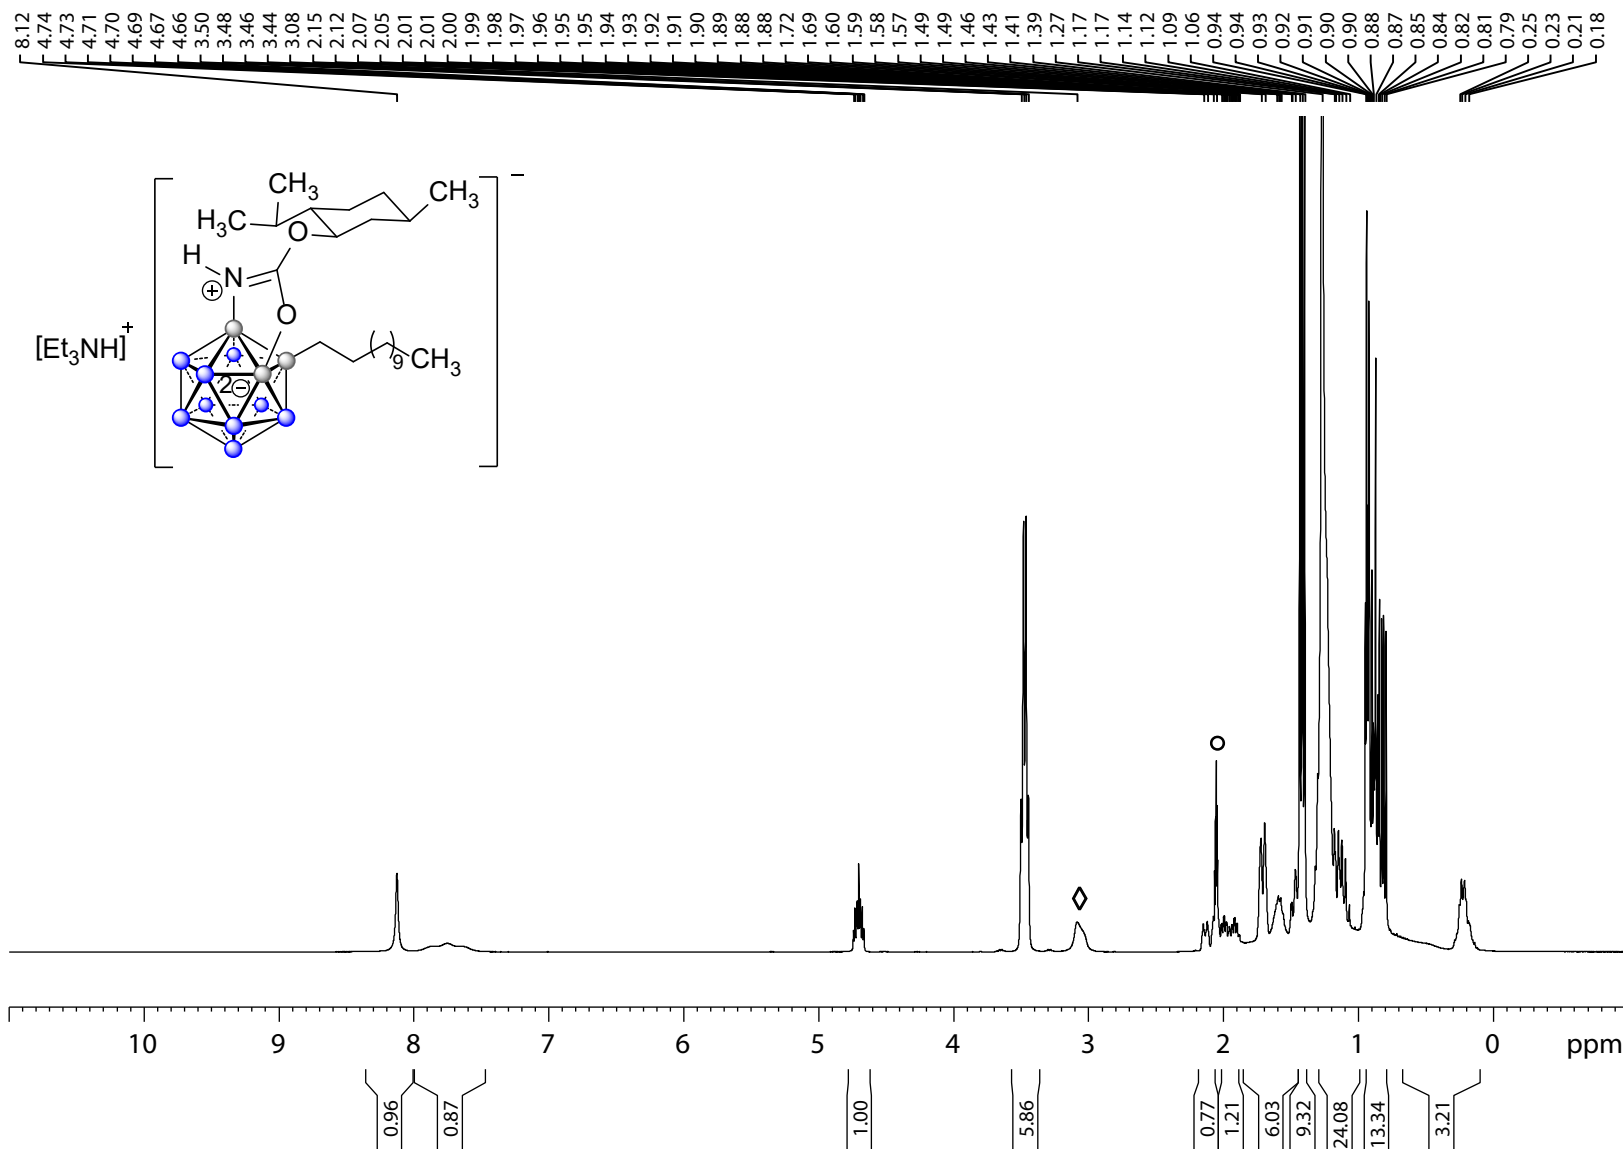

Current Data Parameters  
NAME 20190507-RV-B12M-Dodecene  
EXPNO 1  
PROCNO 1

F2 - Acquisition Parameters  
Date\_ 20190508  
Time\_ 5.38  
INSTRUM spect  
PROBHD 5 mm PABBO BB/  
PULPROG zg30  
TD 65536  
SOLVENT Acetone  
NS 16  
DS 2  
SWH 10000.000 Hz  
FIDRES 0.152588 Hz  
AQ 3.2767999 sec  
RG 39.73  
DW 50.000 usec  
DE 6.50 usec  
TE 294.1 K  
D1 1.00000000 sec  
TD0 1

===== CHANNEL f1 =====  
NUC1  $^1\text{H}$   
P1 15.00 usec  
PLW1 12.5000000 W  
SFO1 400.1328009 MHz

F2 - Processing parameters  
SI 65536  
SF 400.1300071 MHz  
WDW EM  
SSB 0  
LB 0.30 Hz  
GB 0  
PC 1.00



20190507-B12M-Dodecane 20 mg white solid [Et<sub>3</sub>NH][B<sub>12</sub>H<sub>10</sub>NHC(Menthyl)OC<sub>10</sub>H<sub>21</sub>] dissolved in 0.6 mL acetone-d<sub>6</sub>\*

400MHz <sup>1</sup>H{B} NMR, ◊ deuterated solvent residual peak= 2.05 ppm; ◇ water peak

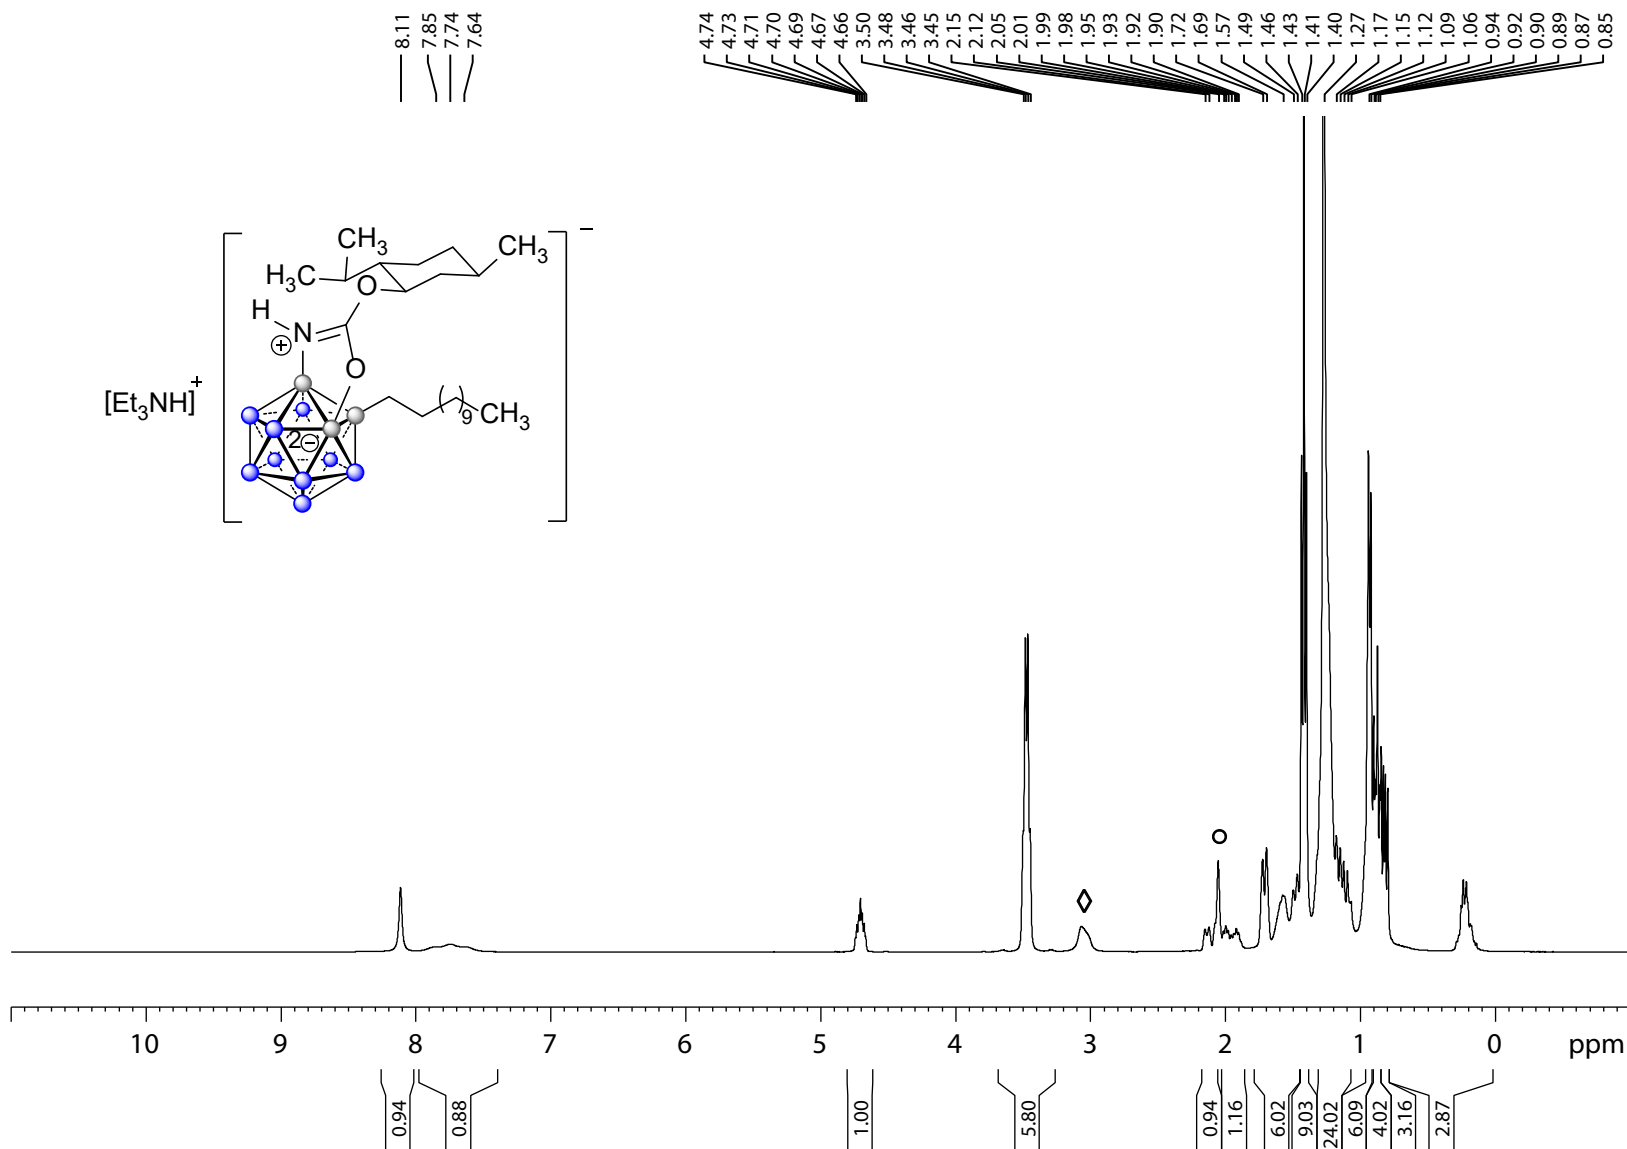

Current Data Parameters  
 NAME 20190507-RV-B12M-Dodecene  
 EXPNO 2  
 PROCNO 1

F2 - Acquisition Parameters  
 Date\_ 20190508  
 Time\_ 5.40  
 INSTRUM spect  
 PROBHD 5 mm PABBO BB/  
 PULPROG zgig30  
 TD 16384  
 SOLVENT Acetone  
 NS 16  
 DS 4  
 SWH 8012.820 Hz  
 FIDRES 0.489064 Hz  
 AQ 1.0223616 sec  
 RG 39.73  
 DW 62.400 usec  
 DE 6.50 usec  
 TE 294.5 K  
 D1 1.00000000 sec  
 D11 0.03000000 sec  
 TD0 1

==== CHANNEL f1 =====  
 NUC1 1H  
 P1 15.00 usec  
 PLW1 12.50000000 W  
 SFO1 400.1320007 MHz

==== CHANNEL f2 =====  
 CPDPRG[2] garp4  
 NUC2 11B  
 PCPD2 90.00 usec  
 PLW2 52.96599960 W  
 PLW12 0.64477998 W  
 SFO2 128.3776050 MHz

F2 - Processing parameters  
 SI 32768  
 SF 400.1300072 MHz  
 WDW EM  
 SSB 0  
 LB 1.00 Hz  
 GB 0  
 PC 1.40

20190507-B12M-Dodecane 20 mg white solid  $[\text{Et}_3\text{NH}][\text{B}_{12}\text{H}_{10}\text{NHC}(\text{Menthyl})\text{OC}_{10}\text{H}_{21}]$  dissolved in 0.6 mL acetone- $d_6$ \*

$^{11}\text{B}$  NMR 128 MHz

Current Data Parameters  
 NAME 20190507-RV-B12M-Dodecene  
 EXPNO 3  
 PROCNO 1

F2 - Acquisition Parameters  
 Date\_ 20190508  
 Time\_ 5.46  
 INSTRUM spect  
 PROBHD 5 mm PABBO BB/  
 PULPROG zg  
 TD 65536  
 SOLVENT Acetone  
 NS 128  
 DS 4  
 SWH 25510.203 Hz  
 FIDRES 0.389255 Hz  
 AQ 1.2845056 sec  
 RG 193.34  
 DW 19.600 usec  
 DE 6.50 usec  
 TE 294.4 K  
 D1 1.0000000 sec  
 TD0 1

===== CHANNEL f1 =====  
 NUC1 11B  
 P1 9.93 usec  
 PLW1 52.96599960 W  
 SFO1 128.3776052 MHz

F2 - Processing parameters  
 SI 32768  
 SF 128.3776050 MHz  
 WDW EM  
 SSB 0  
 LB 10.00 Hz  
 GB 0  
 PC 1.40

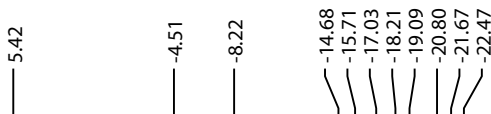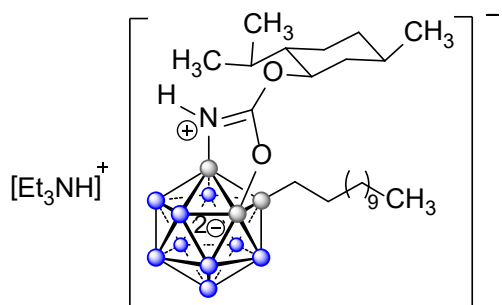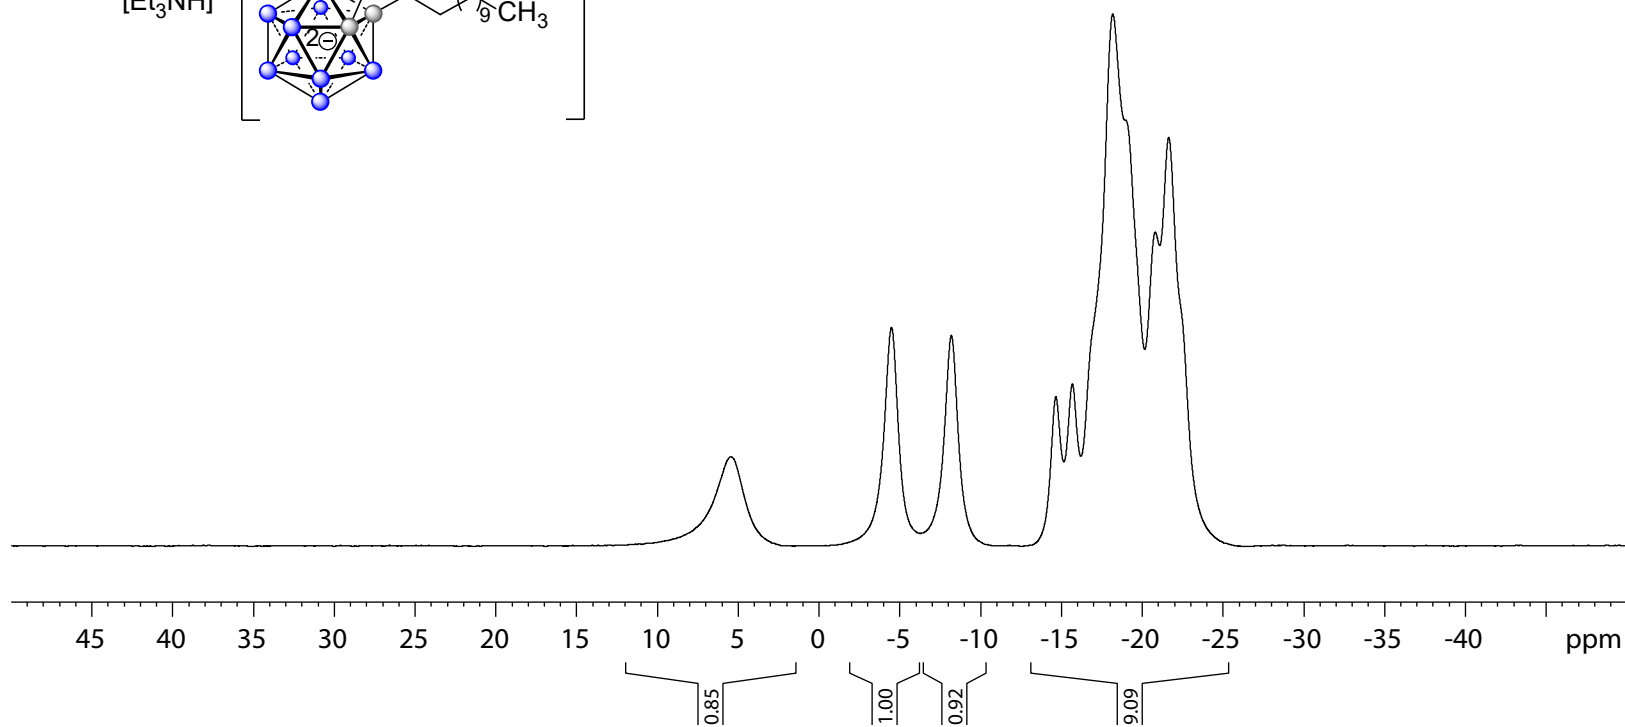

20190507-B12M-Dodecane 20 mg white solid  $[\text{Et}_3\text{NH}][\text{B}_{12}\text{H}_{10}\text{NHC}(\text{Menthyl})\text{OC}_{10}\text{H}_{21}]$  dissolved in 0.6 mL acetone- $d_6^*$

$^{11}\text{B}\{\text{H}\}$  NMR 128 MHz

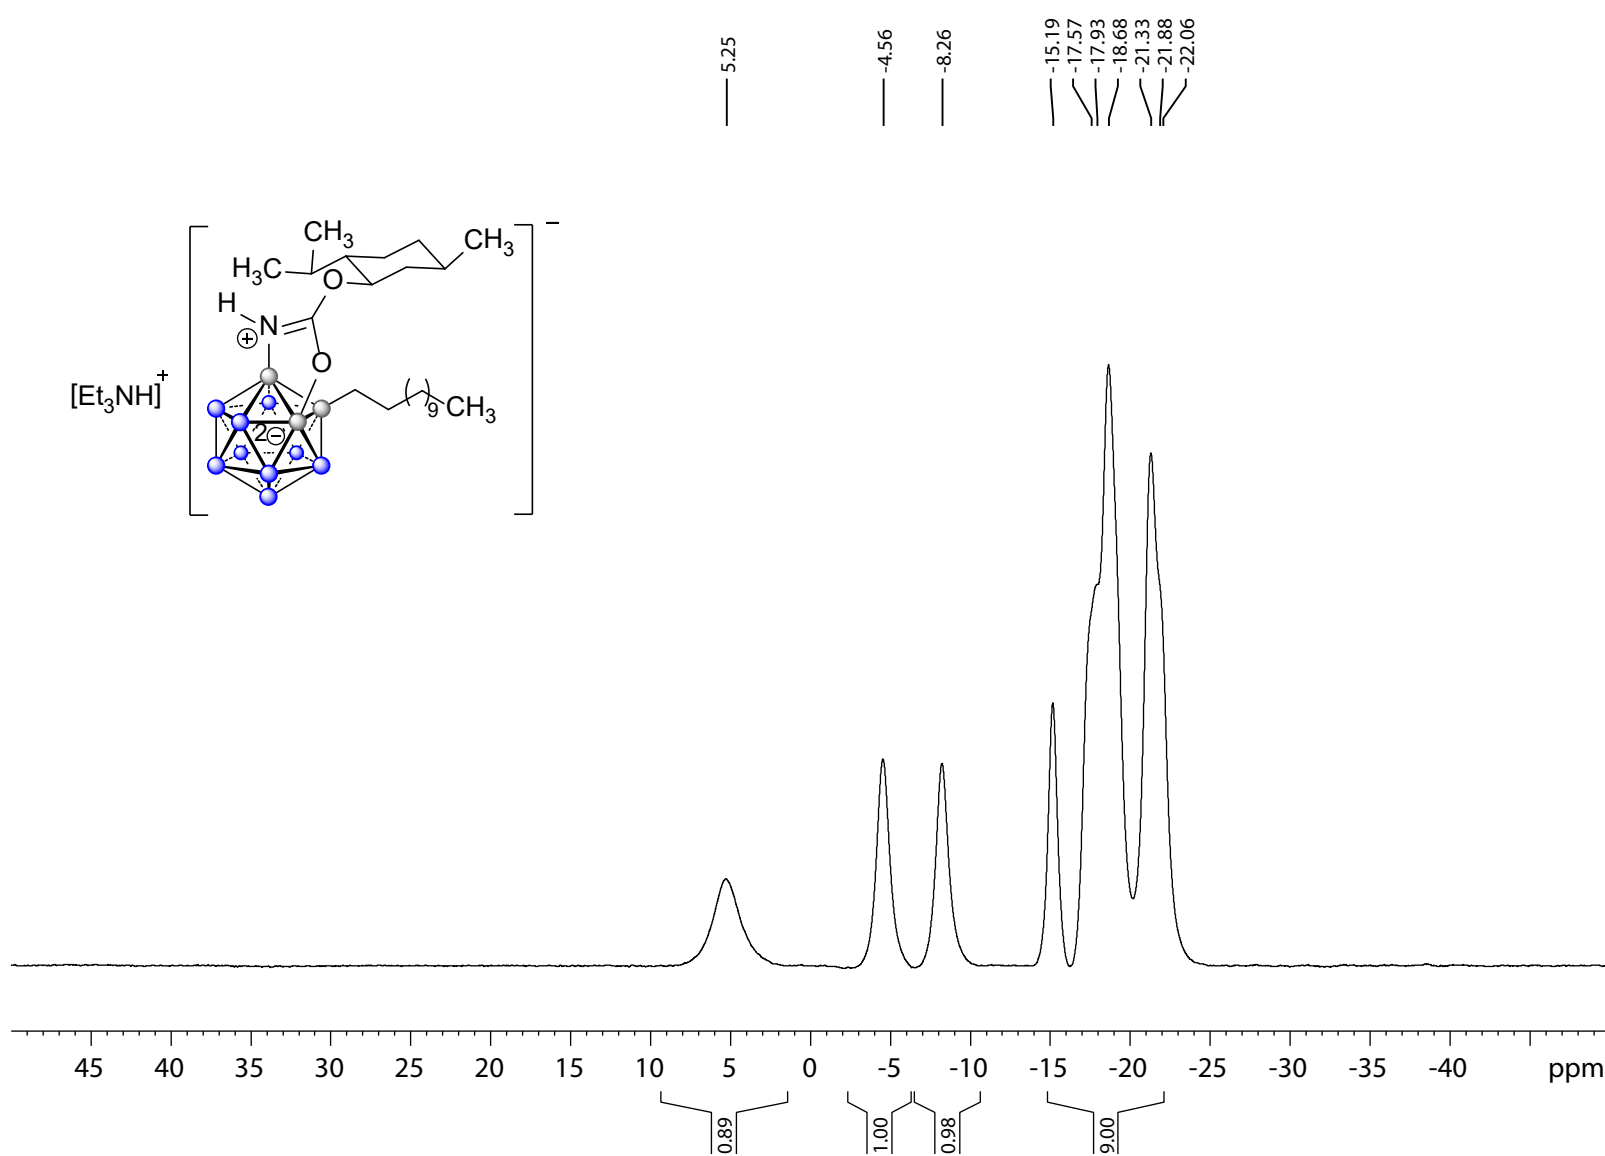

Current Data Parameters  
NAME 20190507-RV-B12M-Dodecene  
EXPNO 4  
PROCNO 1

F2 - Acquisition Parameters  
Date\_ 20190508  
Time 5.52  
INSTRUM spect  
PROBHD 5 mm PABBO BB/  
PULPROG zgpg30  
TD 65536  
SOLVENT Acetone  
NS 128  
DS 4  
SWH 25510.203 Hz  
FIDRES 0.389255 Hz  
AQ 1.2845056 sec  
RG 193.34  
DW 19.600 usec  
DE 6.50 usec  
TE 294.8 K  
D1 1.00000000 sec  
D11 0.03000000 sec  
TD0 1

===== CHANNEL f1 =====  
NUC1 11B  
P1 9.93 usec  
PLW1 52.96599960 W  
SFO1 128.3776050 MHz

===== CHANNEL f2 =====  
CPDPRG[2] waltz16  
NUC2 1H  
PCPD2 80.00 usec  
PLW2 12.50000000 W  
PLW12 0.43945000 W  
PLW13 0.28125000 W  
SFO2 400.1320007 MHz

F2 - Processing parameters  
SI 32768  
SF 128.3776050 MHz  
WDW EM  
SSB 0  
LB 10.00 Hz  
GB 0  
PC 1.40

20190507-B12M-Dodecane 20 mg white solid [Et<sub>3</sub>NH][B<sub>12</sub>H<sub>10</sub>NHC(Menthyl)OC<sub>10</sub>H<sub>21</sub>] dissolved in 0.6 mL acetone-d<sub>6</sub>\*

<sup>13</sup>C{<sup>1</sup>H} NMR 100 MHz

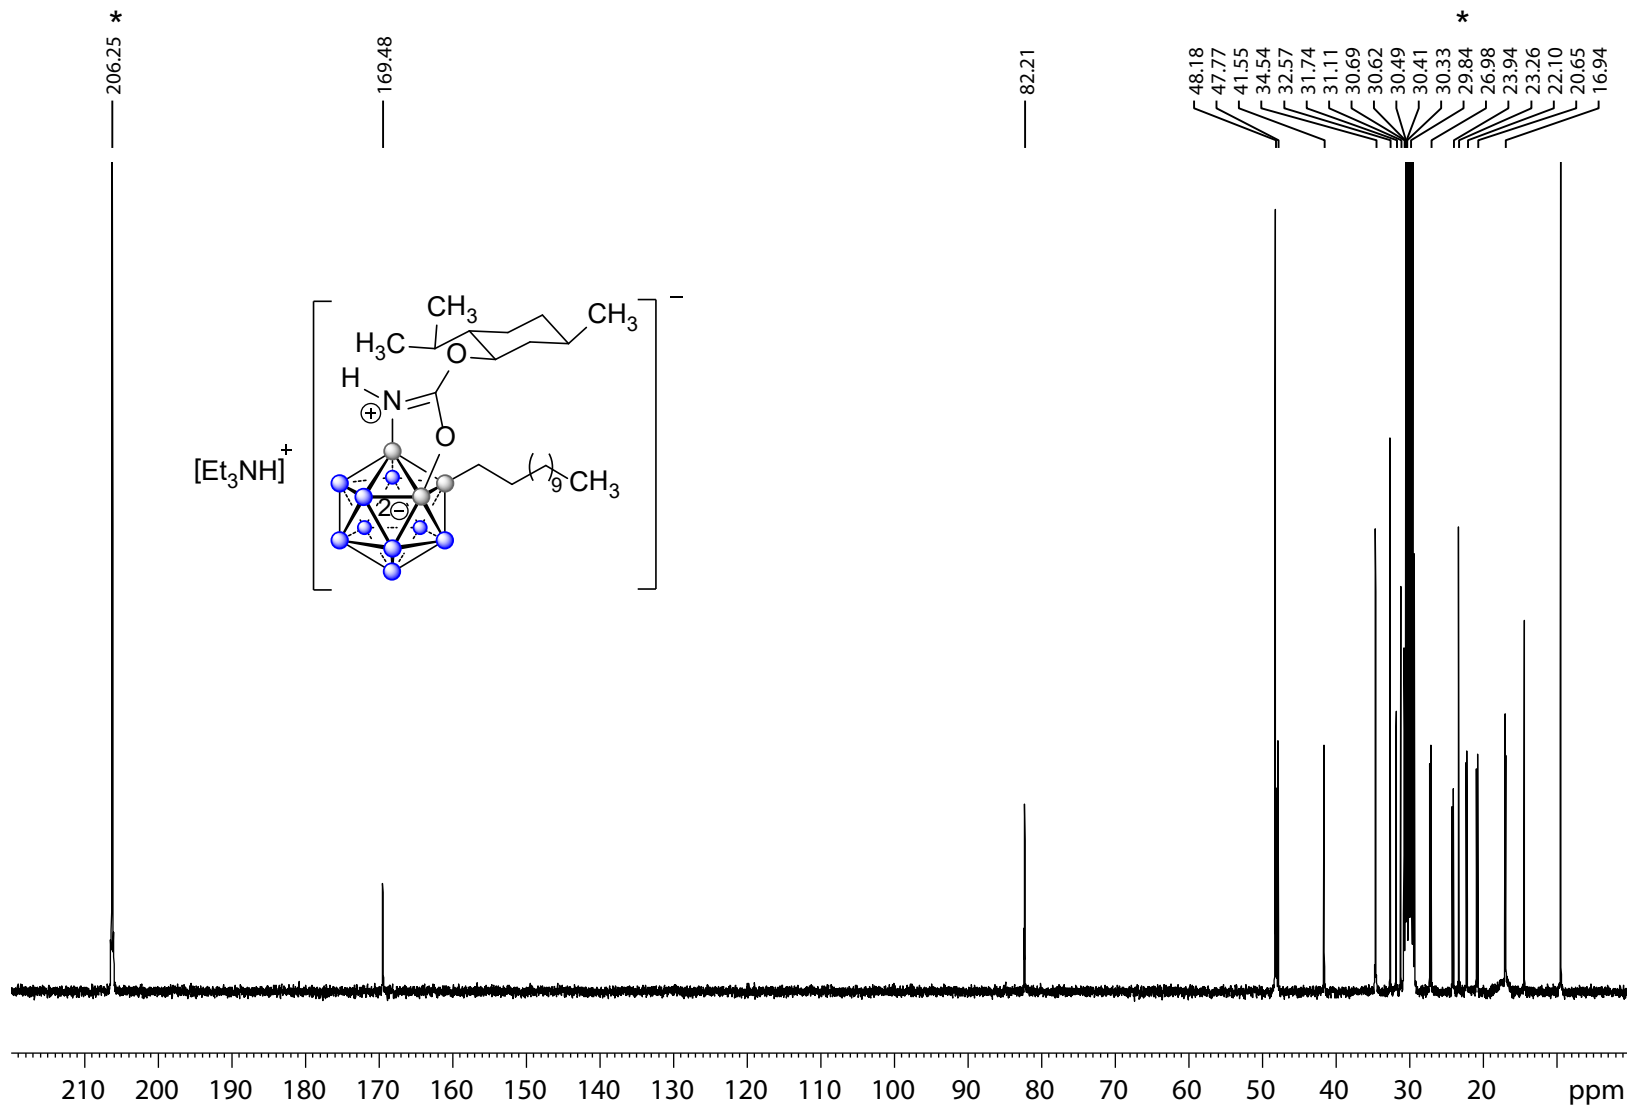

Current Data Parameters  
 NAME 20190507-RV-B12M-Dodecene  
 EXPNO 9  
 PROCNO 1

F2 - Acquisition Parameters  
 Date\_ 20190508  
 Time\_ 18.54  
 INSTRUM spect  
 PROBHD 5 mm PABBO BB/  
 PULPROG zgpg30  
 TD 65536  
 SOLVENT Acetone  
 NS 2048  
 DS 4  
 SWH 29761.904 Hz  
 FIDRES 0.454131 Hz  
 AQ 1.1010048 sec  
 RG 193.34  
 DW 16.800 usec  
 DE 6.50 usec  
 TE 295.5 K  
 D1 1.50000000 sec  
 D11 0.03000000 sec  
 TD0 1

==== CHANNEL f1 =====  
 NUC1 13C  
 P1 10.00 usec  
 PLW1 53.00000000 W  
 SFO1 100.6228293 MHz

==== CHANNEL f2 =====  
 CPDPRG[2] waltz16  
 NUC2 1H  
 PCPD2 80.00 usec  
 PLW2 12.50000000 W  
 PLW12 0.43945000 W  
 PLW13 0.28125000 W  
 SFO2 400.1316005 MHz

F2 - Processing parameters  
 SI 32768  
 SF 100.6126885 MHz  
 WDW EM  
 SSB 0  
 LB 1.00 Hz  
 GB 0  
 PC 1.40

20190507-B12M-Dodecane 20 mg white solid [Et<sub>3</sub>NH][B<sub>12</sub>H<sub>10</sub>NHC(Menthyl)OC<sub>10</sub>H<sub>21</sub>] dissolved in 0.6 mL acetone-d<sub>6</sub>\*

<sup>13</sup>CDEPT NMR 100 MHz

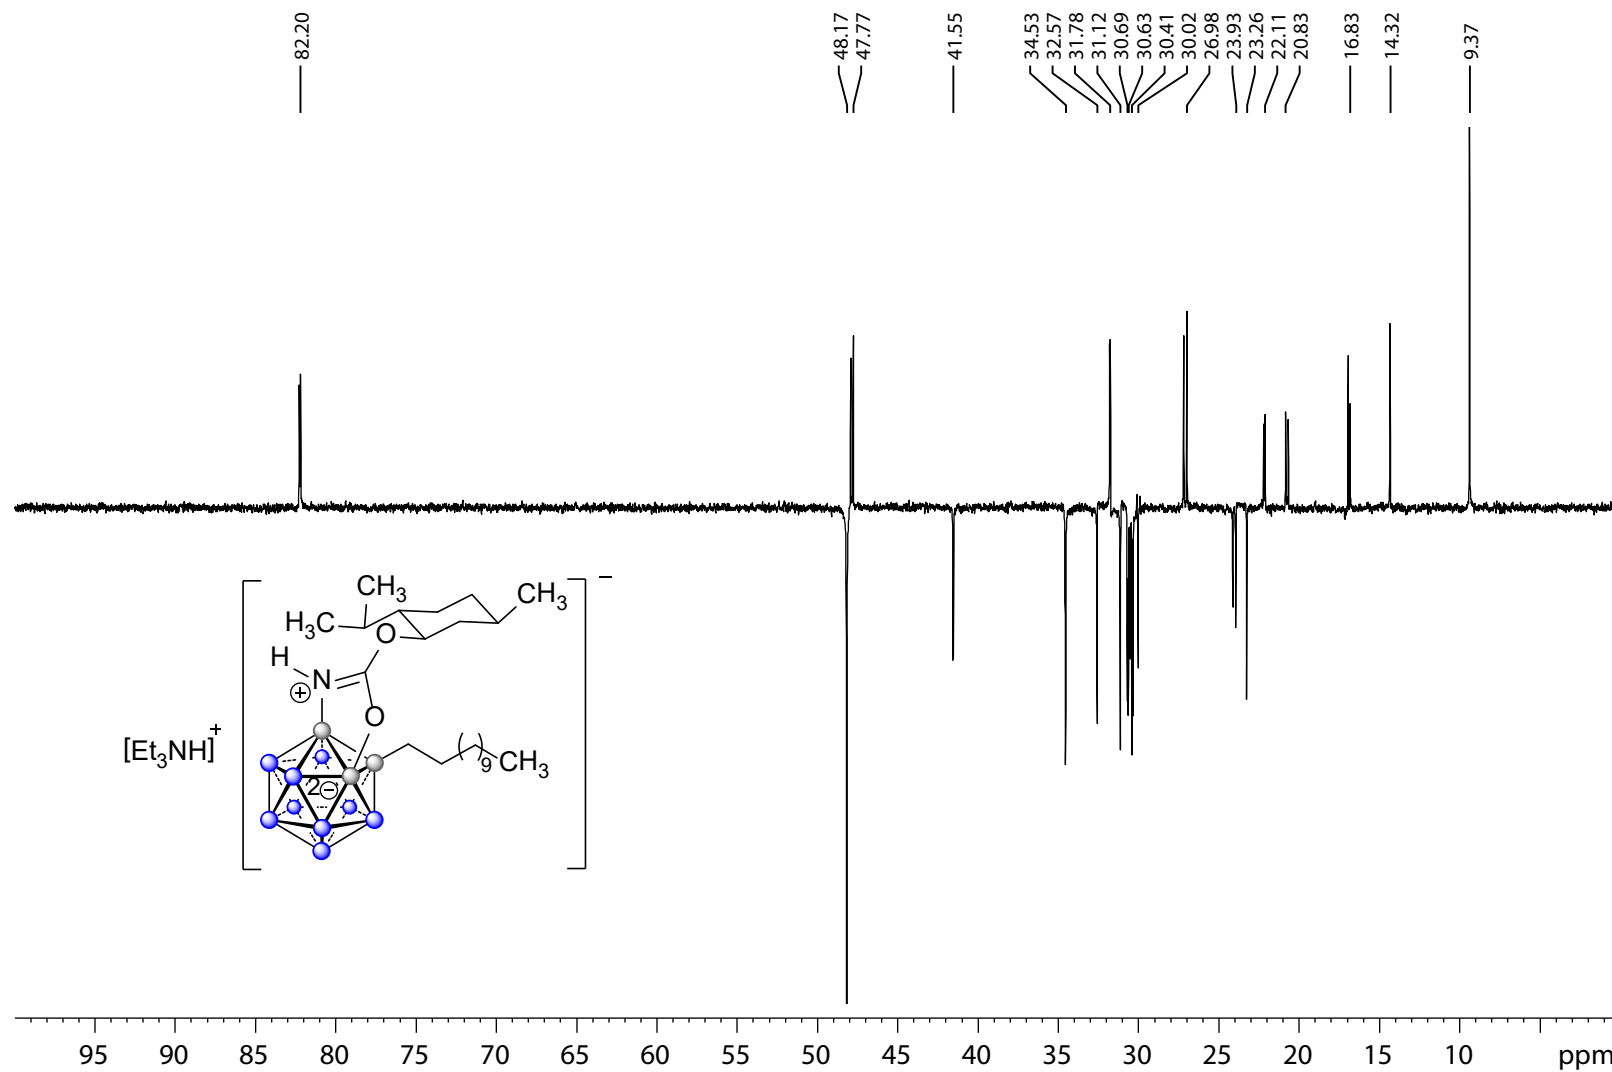

Current Data Parameters  
 NAME 20190507-RV-B12M-Dodecene  
 EXPNO 11  
 PROCNO 1

F2 - Acquisition Parameters  
 Date\_ 20190508  
 Time\_ 19.23  
 INSTRUM spect  
 PROBHD 5 mm PABBO BB/  
 PULPROG dept135  
 TD 65536  
 SOLVENT Acetone  
 NS 512  
 DS 4  
 SWH 29296.875 Hz  
 FIDRES 0.447035 Hz  
 AQ 1.1184810 sec  
 RG 193.34  
 DW 17.067 usec  
 DE 6.50 usec  
 TE 294.8 K  
 CNST2 145.0000000  
 D1 2.00000000 sec  
 D2 0.00344828 sec  
 D12 0.00002000 sec  
 TD0 1

==== CHANNEL f1 =====  
 NUC1 13C  
 P1 10.00 usec  
 P2 20.00 usec  
 PLW1 53.00000000 W  
 SFO1 100.6228293 MHz

==== CHANNEL f2 =====  
 CPDPRG[2] waltz16  
 NUC2 1H  
 P3 15.00 usec  
 P4 30.00 usec  
 PCPD2 80.00 usec  
 PLW2 12.50000000 W  
 PLW12 0.43945000 W  
 SFO2 400.1316005 MHz

F2 - Processing parameters  
 SI 32768  
 SF 100.6126883 MHz  
 WDW EM  
 SSB 0  
 LB 1.00 Hz  
 GB 0  
 PC 4.00

<sup>1</sup>H - <sup>1</sup>H COSY NMR

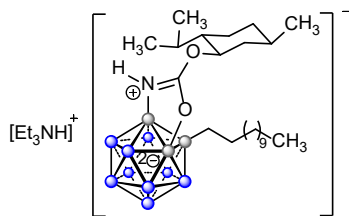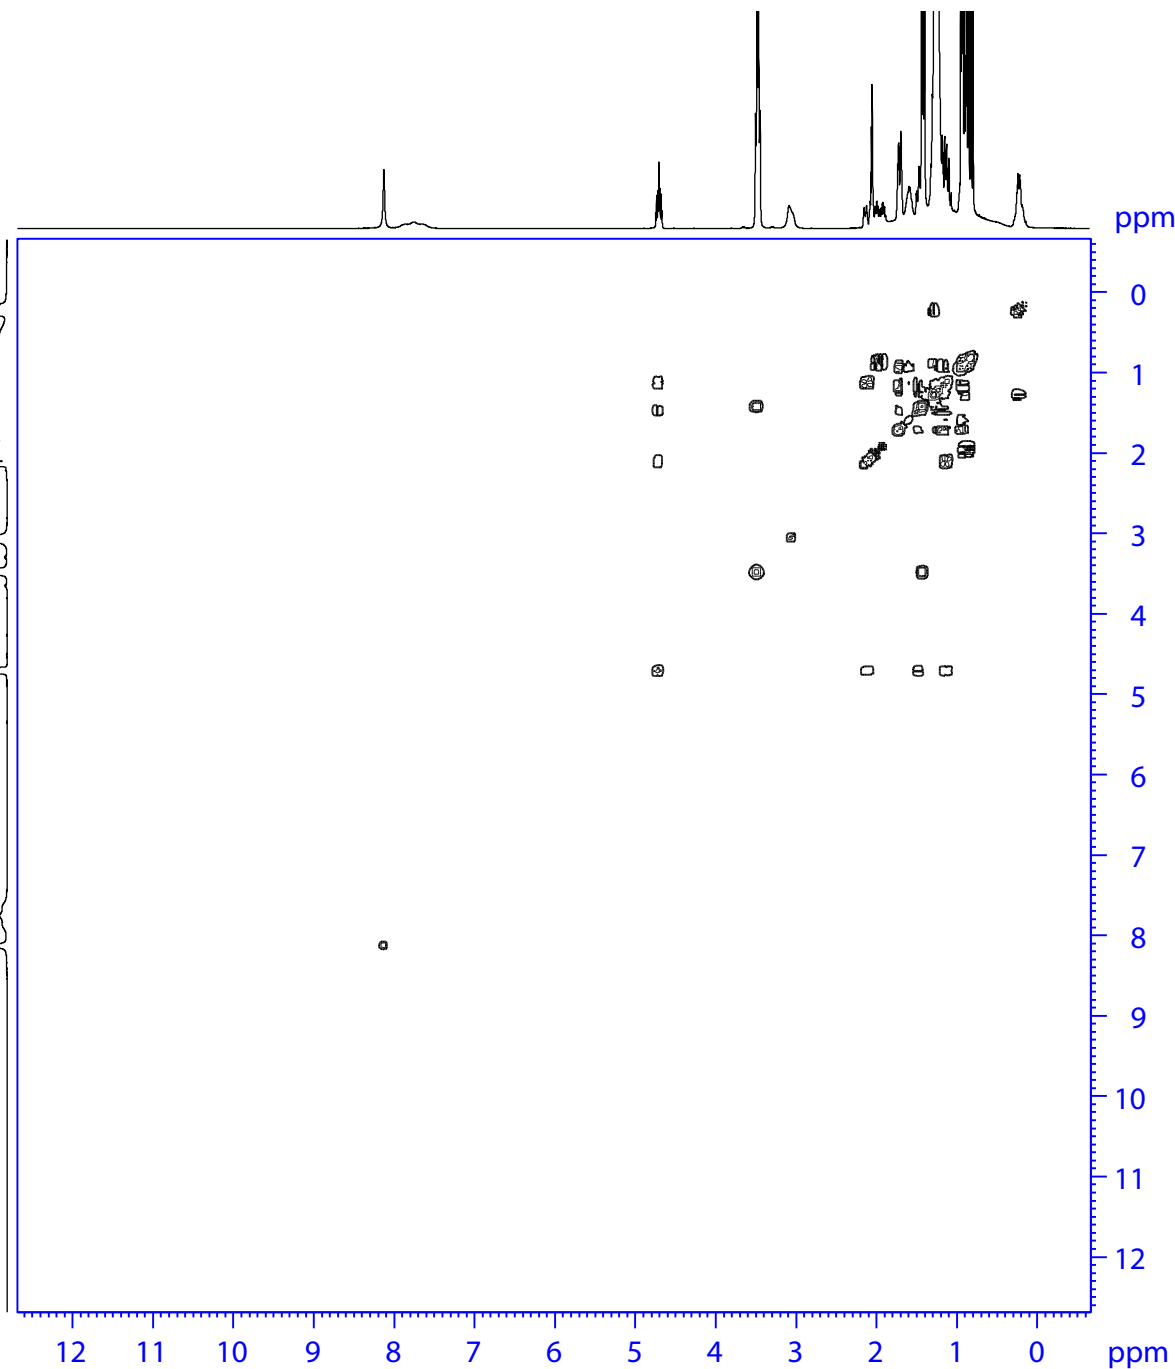

Current Data Parameters  
 NAME 20190507-RV-B12M-Dodecene  
 EXPNO 12  
 PROCNO 1

F2 - Acquisition Parameters  
 Date\_ 20190508  
 Time\_ 19.24  
 INSTRUM spect  
 PROBHD 5 mm PABBO BB/  
 PULPROG cosygpppqf  
 TD 2048  
 SOLVENT Acetone  
 NS 2  
 DS 8  
 SWH 5341.880 Hz  
 FIDRES 2.608340 Hz  
 AQ 0.1916928 sec  
 RG 64.43  
 DW 93.600 usec  
 DE 6.50 usec  
 TE 294.6 K  
 D0 0.00000300 sec  
 D1 2.00000000 sec  
 D11 0.03000000 sec  
 D12 0.00002000 sec  
 D13 0.00000400 sec  
 D16 0.00020000 sec  
 INO 0.00018720 sec

===== CHANNEL f1 =====  
 NUC1 1H  
 P0 15.00 usec  
 P1 15.00 usec  
 P17 2500.00 usec  
 PLW1 12.50000000 W  
 PLW10 4.16050005 W  
 SFO1 400.1324057 MHz

===== GRADIENT CHANNEL =====  
 GPNAM[1] SMSQ10.100  
 GPZ1 10.00 %  
 P16 1000.00 usec

F1 - Acquisition parameters  
 TD 128  
 SFO1 400.1324 MHz  
 FIDRES 83.466881 Hz  
 SW 13.350 ppm  
 FhMODE QF

F2 - Processing parameters  
 SI 1024  
 SF 400.1300000 MHz  
 WDW QSINE  
 SSB 0  
 LB 0 Hz  
 GB 0  
 PC 1.40

F1 - Processing parameters  
 SI 1024  
 MC2 QF  
 SF 400.1300000 MHz  
 WDW QSINE  
 SSB 0  
 LB 0 Hz  
 GB 0

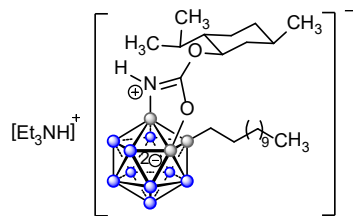

$^1\text{H} - ^{13}\text{C}$  HSQC NMR

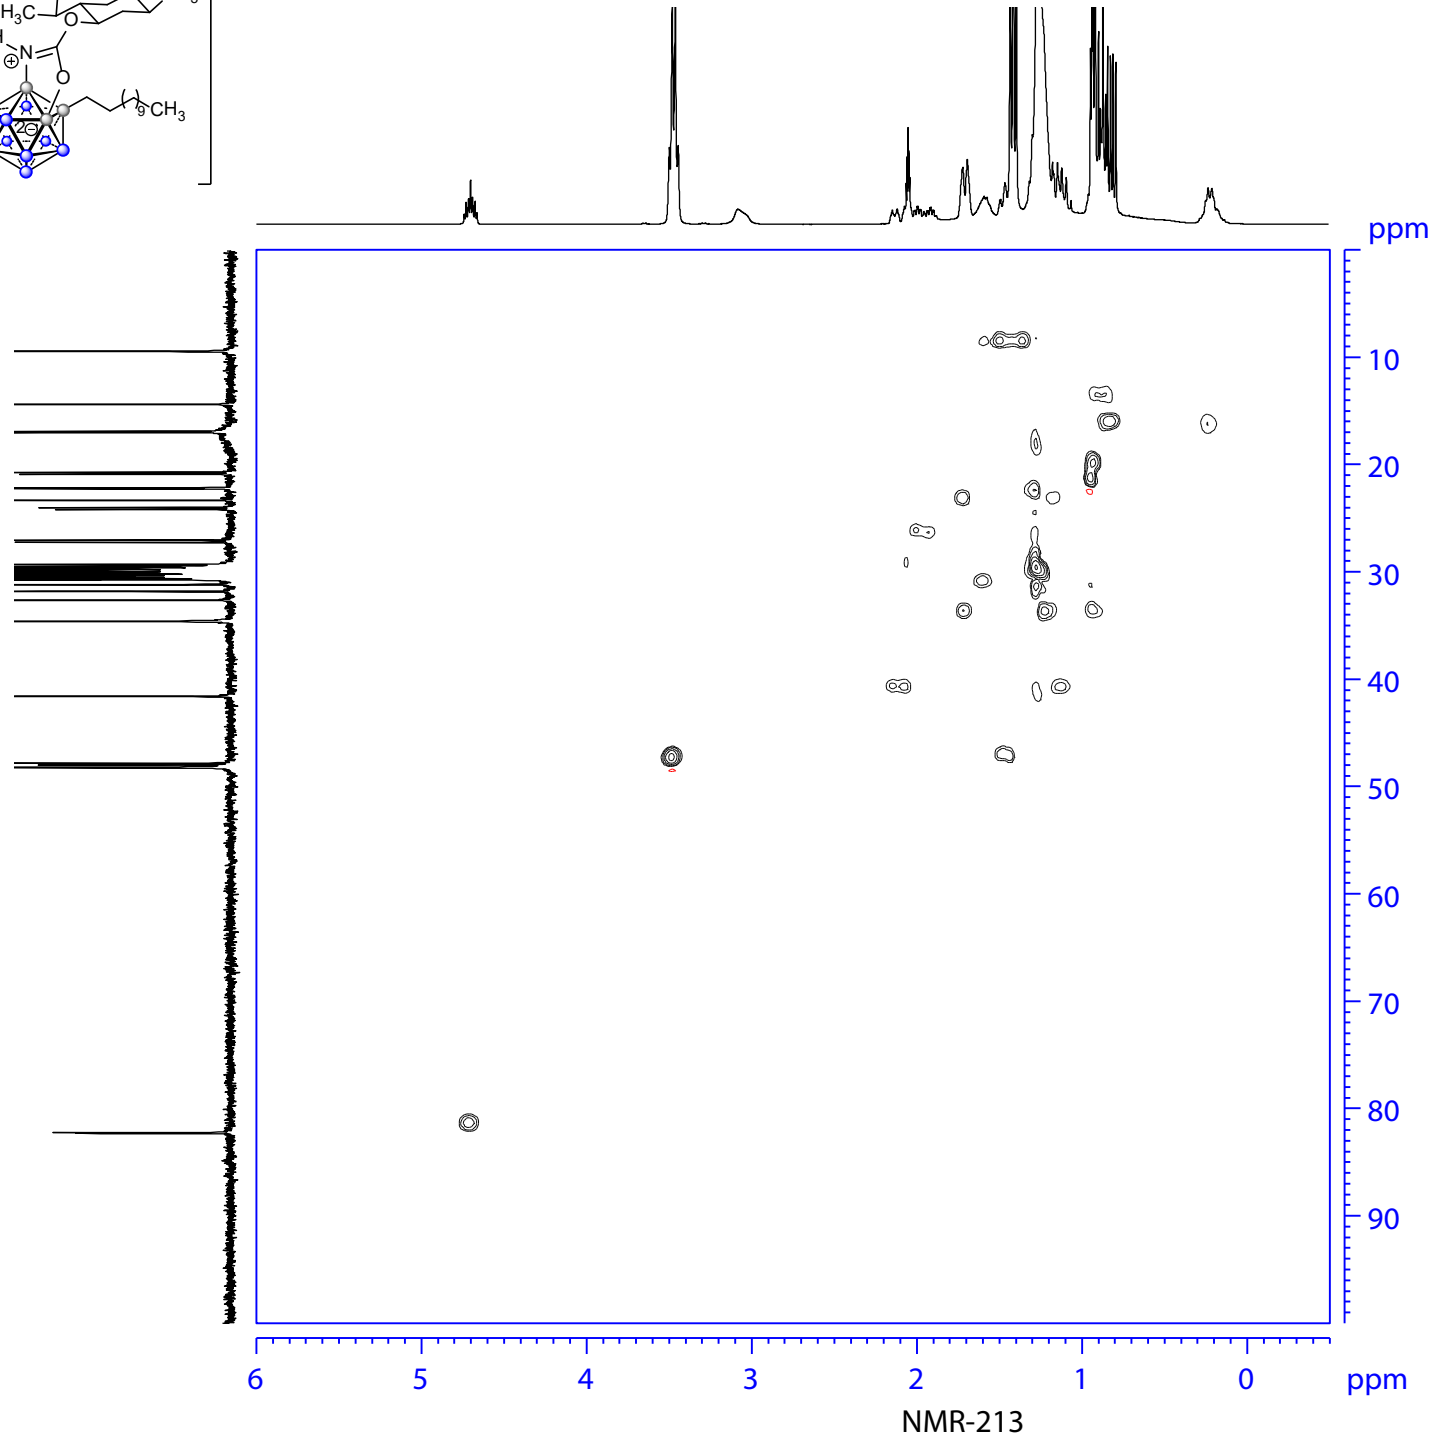

Current Data Parameters  
 NAME 20190507-RV-B12M-Dodecene  
 EXPNO 13  
 PROCNO 1

F2 - Acquisition Parameters  
 Date\_ 20190508  
 Time 19.35  
 INSTRUM spect  
 PROBHD 5 mm PABBO BB/  
 PULPROG hsqcetgpsi2  
 TD 1024  
 SOLVENT Acetone  
 NS 2  
 DS 16  
 SWH 6009.615 Hz  
 FIDRES 5.868765 Hz  
 AQ 0.0851968 sec  
 RG 193.34  
 DW 83.200 usec  
 DE 6.50 usec  
 TE 295.0 K  
 CNST2 145.0000000  
 D0 0.00000300 sec  
 D1 1.50000000 sec  
 D4 0.00172414 sec  
 D11 0.03000000 sec  
 D16 0.00020000 sec  
 D24 0.00086207 sec  
 IN0 0.00001990 sec  
 ZGPTNS

===== CHANNEL f1 =====  
 NUC1  $^1\text{H}$   
 P1 15.00 usec  
 P2 30.00 usec  
 P28 1000.00 usec  
 PLW1 12.50000000 W  
 SFO1 400.1328009 MHz

===== CHANNEL f2 =====  
 CPDPRG[2] garp  
 NUC2  $^{13}\text{C}$   
 P3 10.00 usec  
 P4 20.00 usec  
 PCPD2 70.00 usec  
 PLW2 53.00000000 W  
 PLW12 1.08159995 W  
 SFO2 100.6238364 MHz

===== GRADIENT CHANNEL =====  
 GPNAM[1] SMSQ10.100  
 GPNAM[2] SMSQ10.100  
 GPNAM[3] SMSQ10.100  
 GPNAM[4] SMSQ10.100  
 GPZ1 80.00 %  
 GPZ2 20.10 %  
 GPZ3 11.00 %  
 GPZ4 -5.00 %  
 P16 1000.00 usec  
 P19 600.00 usec

F1 - Acquisition parameters  
 TD 256  
 SFO1 100.6238 MHz  
 FIDRES 196.524048 Hz  
 SW 249.991 ppm  
 FMODE Echo-Antiecho

F2 - Processing parameters  
 SI 1024  
 SF 400.1300000 MHz  
 WDW QSINE  
 SSB 2  
 LB 0 Hz  
 GB 0  
 PC 1.40

F1 - Processing parameters  
 SI 1024  
 MC2 echo-antiecho  
 SF 100.6127690 MHz  
 WDW QSINE  
 SSB 2  
 LB 0 Hz  
 GB 0

20190226-B12C-cyclizn 20 mg white solid [Et<sub>3</sub>NH][B<sub>12</sub>H<sub>10</sub>NHC(Camphanic)O] dissolved in 0.6 mL acetone-d<sub>6</sub>\*  
 400MHz <sup>1</sup>H NMR, ◊ deuterated solvent residual peak= 2.05 ppm; ◇ water peak

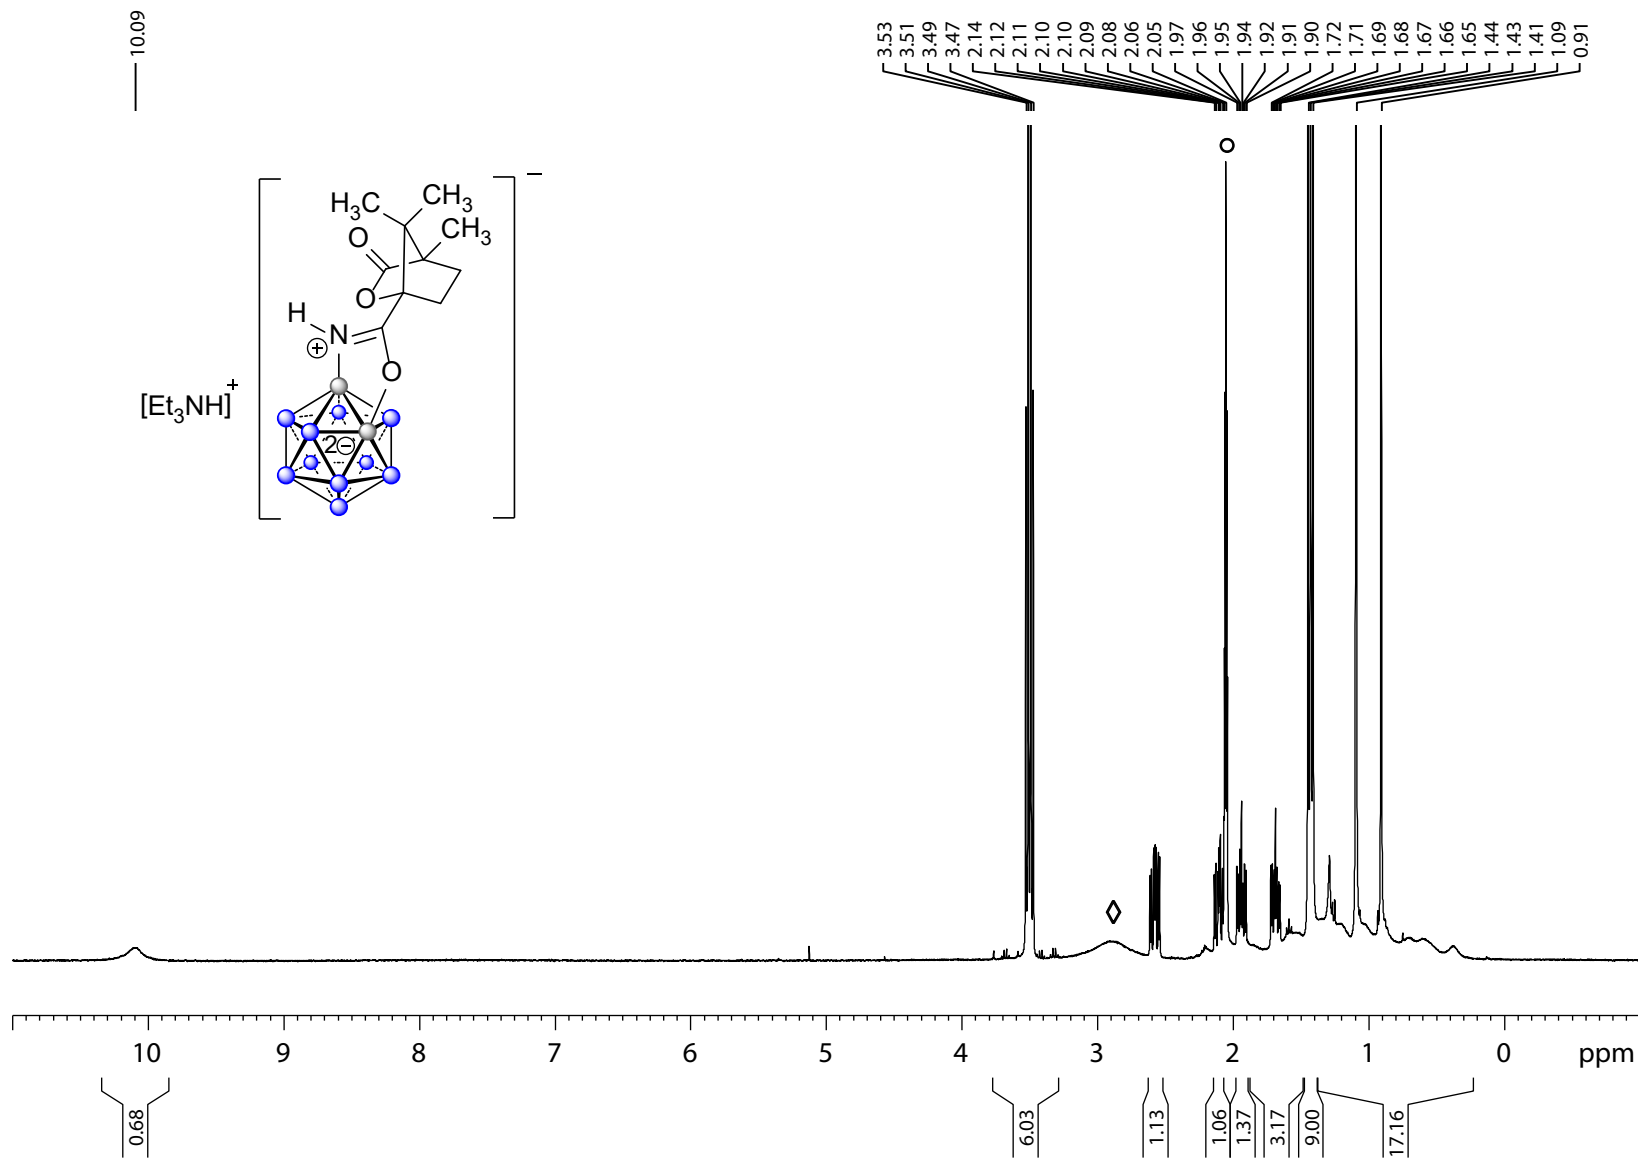

Current Data Parameters  
 NAME 20191026-RV-B12C-Cyclizn  
 EXPNO 1  
 PROCNO 1

F2 - Acquisition Parameters  
 Date\_ 20191027  
 Time\_ 20.44  
 INSTRUM spect  
 PROBHD 5 mm PABBO BB/  
 PULPROG zg30  
 TD 65536  
 SOLVENT Acetone  
 NS 16  
 DS 2  
 SWH 10000.000 Hz  
 FIDRES 0.152588 Hz  
 AQ 3.2767999 sec  
 RG 193.34  
 DW 50.000 usec  
 DE 6.50 usec  
 TE 297.1 K  
 D1 1.00000000 sec  
 TD0 1

===== CHANNEL f1 =====  
 NUC1 1H  
 P1 15.00 usec  
 PLW1 12.50000000 W  
 SFO1 400.1328009 MHz

F2 - Processing parameters  
 SI 65536  
 SF 400.1300069 MHz  
 WDW EM  
 SSB 0  
 LB 0.30 Hz  
 GB 0  
 PC 1.00



20190226-B12C-cyclizn 20 mg white solid  $[\text{Et}_3\text{NH}][\text{B}_{12}\text{H}_{10}\text{NHC}(\text{Camphanic})\text{O}]$  dissolved in 0.6 mL acetone- $d_6^*$   
 400MHz  $^1\text{H}\{\text{B}\}$  NMR,  $\circ$  deuterated solvent residual peak = 2.05 ppm;  $\diamond$  water peak

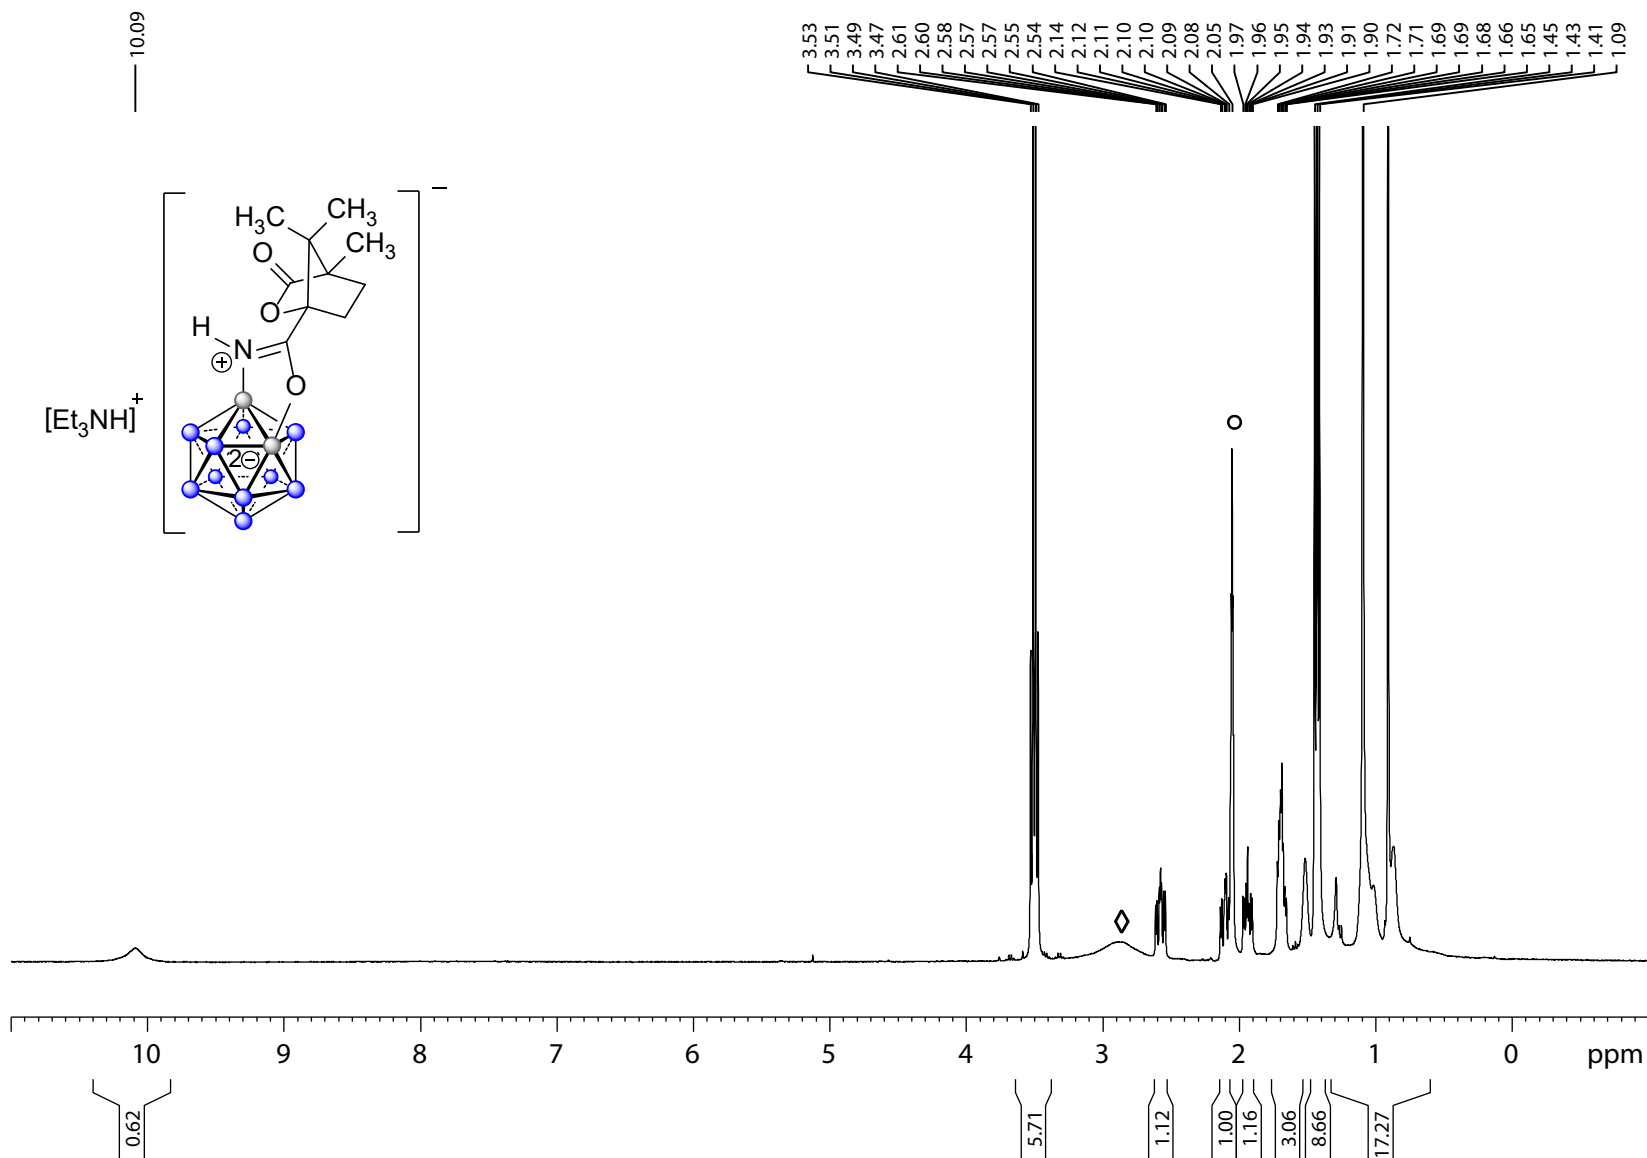

Current Data Parameters  
 NAME 20191026-RV-B12C-Cyclizn  
 EXPNO 2  
 PROCNO 1

F2 - Acquisition Parameters  
 Date\_ 20191027  
 Time\_ 20.46  
 INSTRUM spect  
 PROBHD 5 mm PABBO BB/  
 PULPROG zgig30  
 TD 16384  
 SOLVENT Acetone  
 NS 16  
 DS 4  
 SWH 8012.820 Hz  
 FIDRES 0.489064 Hz  
 AQ 1.0223616 sec  
 RG 107.6  
 DW 62.400 usec  
 DE 6.50 usec  
 TE 297.1 K  
 D1 1.00000000 sec  
 D11 0.03000000 sec  
 TD0 1

==== CHANNEL f1 =====  
 NUC1 1H  
 P1 15.00 usec  
 PLW1 12.50000000 W  
 SFO1 400.1320007 MHz

==== CHANNEL f2 =====  
 CPDPRG[2] garp4  
 NUC2 11B  
 PCPD2 90.00 usec  
 PLW2 52.96599960 W  
 PLW12 0.64477998 W  
 SFO2 128.3776050 MHz

F2 - Processing parameters  
 SI 32768  
 SF 400.1300071 MHz  
 WDW EM  
 SSB 0  
 LB 1.00 Hz  
 GB 0  
 PC 1.40

20190226-B12C-cyclizn 20 mg white solid [Et<sub>3</sub>NH][B<sub>12</sub>H<sub>10</sub>NHC(Camphanic)O] dissolved in 0.6 mL acetone-d<sub>6</sub>\*

<sup>11</sup>B NMR 128 MHz

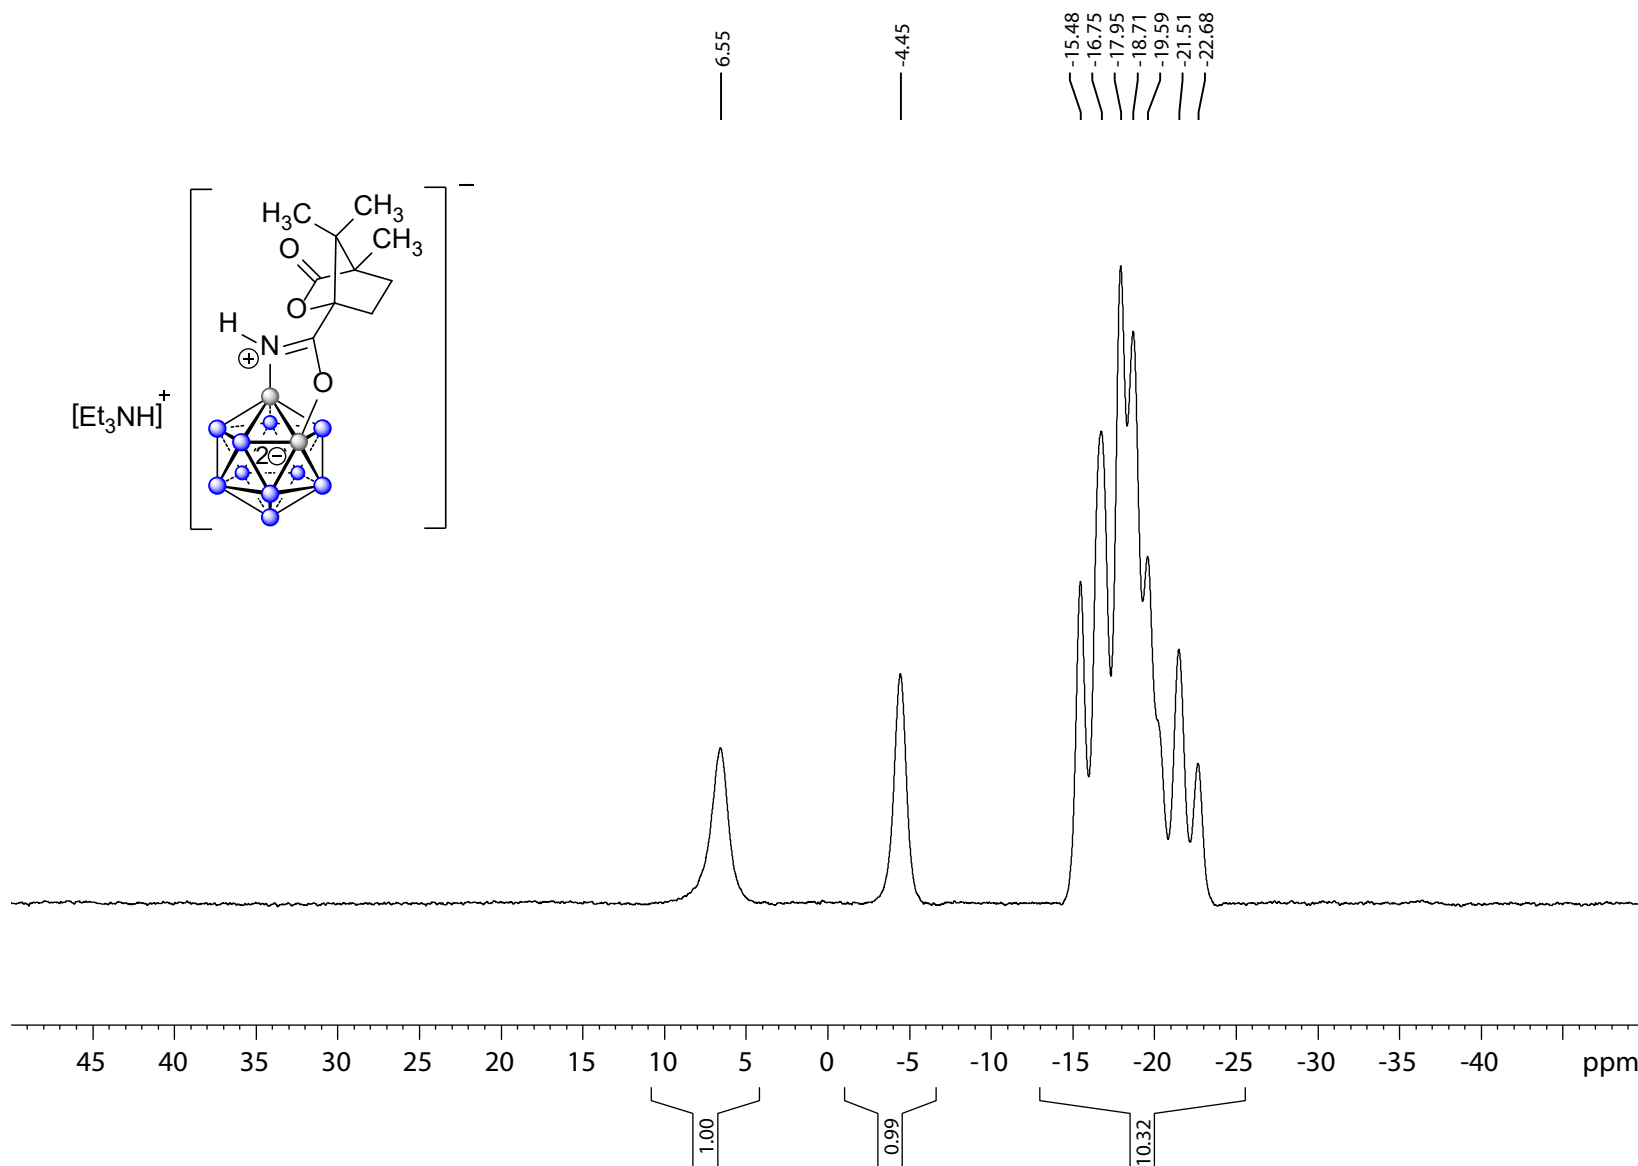

Current Data Parameters  
NAME 20191026-RV-B12C-Cyclizn  
EXPNO 3  
PROCNO 1

F2 - Acquisition Parameters  
Date\_ 20191027  
Time\_ 20.52  
INSTRUM spect  
PROBHD 5 mm PABBO BB/  
PULPROG zg  
TD 65536  
SOLVENT Acetone  
NS 128  
DS 4  
SWH 25510.203 Hz  
FIDRES 0.389255 Hz  
AQ 1.2845056 sec  
RG 193.34  
DW 19.600 usec  
DE 6.50 usec  
TE 296.2 K  
D1 1.00000000 sec  
TD0 1

==== CHANNEL f1 =====  
NUC1 11B  
P1 9.93 usec  
PLW1 52.96599960 W  
SF01 128.3776052 MHz

F2 - Processing parameters  
SI 32768  
SF 128.3776050 MHz  
WDW EM  
SSB 0  
LB 10.00 Hz  
GB 0  
PC 1.40

NMR-216

20190226-B12C-cyclizn 20 mg white solid [Et<sub>3</sub>NH][B<sub>12</sub>H<sub>10</sub>NHC(Camphanic)O] dissolved in 0.6 mL acetone-d<sub>6</sub>\*

<sup>11</sup>B{<sup>1</sup>H} NMR 128 MHz

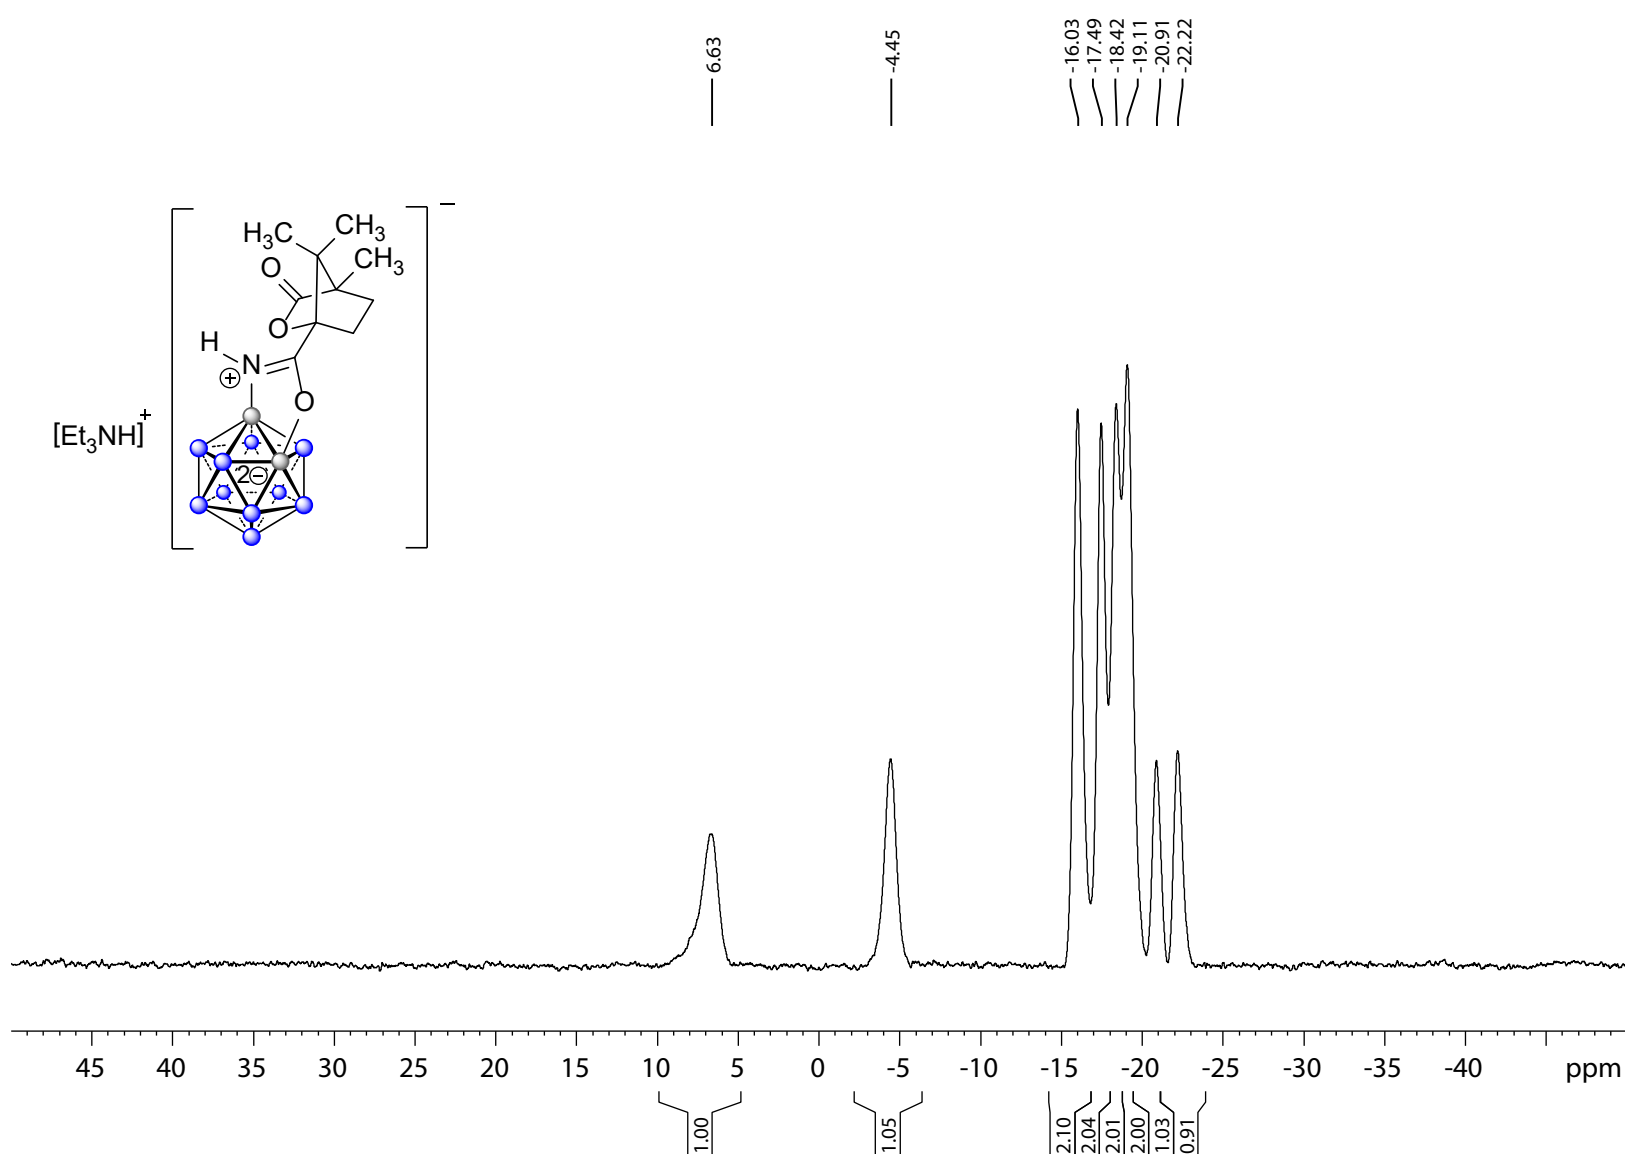

Current Data Parameters  
NAME 20191026-RV-B12C-Cyclizn  
EXPNO 4  
PROCNO 1

F2 - Acquisition Parameters  
Date\_ 20191027  
Time\_ 20.58  
INSTRUM spect  
PROBHD 5 mm PABBO BB/  
PULPROG zgpg30  
TD 65536  
SOLVENT Acetone  
NS 128  
DS 4  
SWH 25510.203 Hz  
FIDRES 0.389255 Hz  
AQ 1.2845056 sec  
RG 193.34  
DW 19.600 usec  
DE 6.50 usec  
TE 297.2 K  
D1 1.00000000 sec  
D11 0.03000000 sec  
TD0 1

==== CHANNEL f1 =====  
NUC1 11B  
P1 9.93 usec  
PLW1 52.96599960 W  
SFO1 128.3776050 MHz

==== CHANNEL f2 =====  
CPDPRG[2] waltz16  
NUC2 1H  
PCPD2 80.00 usec  
PLW2 12.50000000 W  
PLW12 0.43945000 W  
PLW13 0.28125000 W  
SFO2 400.1320007 MHz

F2 - Processing parameters  
SI 32768  
SF 128.3776050 MHz  
WDW EM  
SSB 0  
LB 10.00 Hz  
GB 0  
PC 1.40

20190226-B12C-cyclizn 20 mg white solid [Et<sub>3</sub>NH][B<sub>12</sub>H<sub>10</sub>NHC(Camphanic)O] dissolved in 0.6 mL acetone-d<sub>6</sub>\*

<sup>13</sup>C{<sup>1</sup>H} NMR 100 MHz

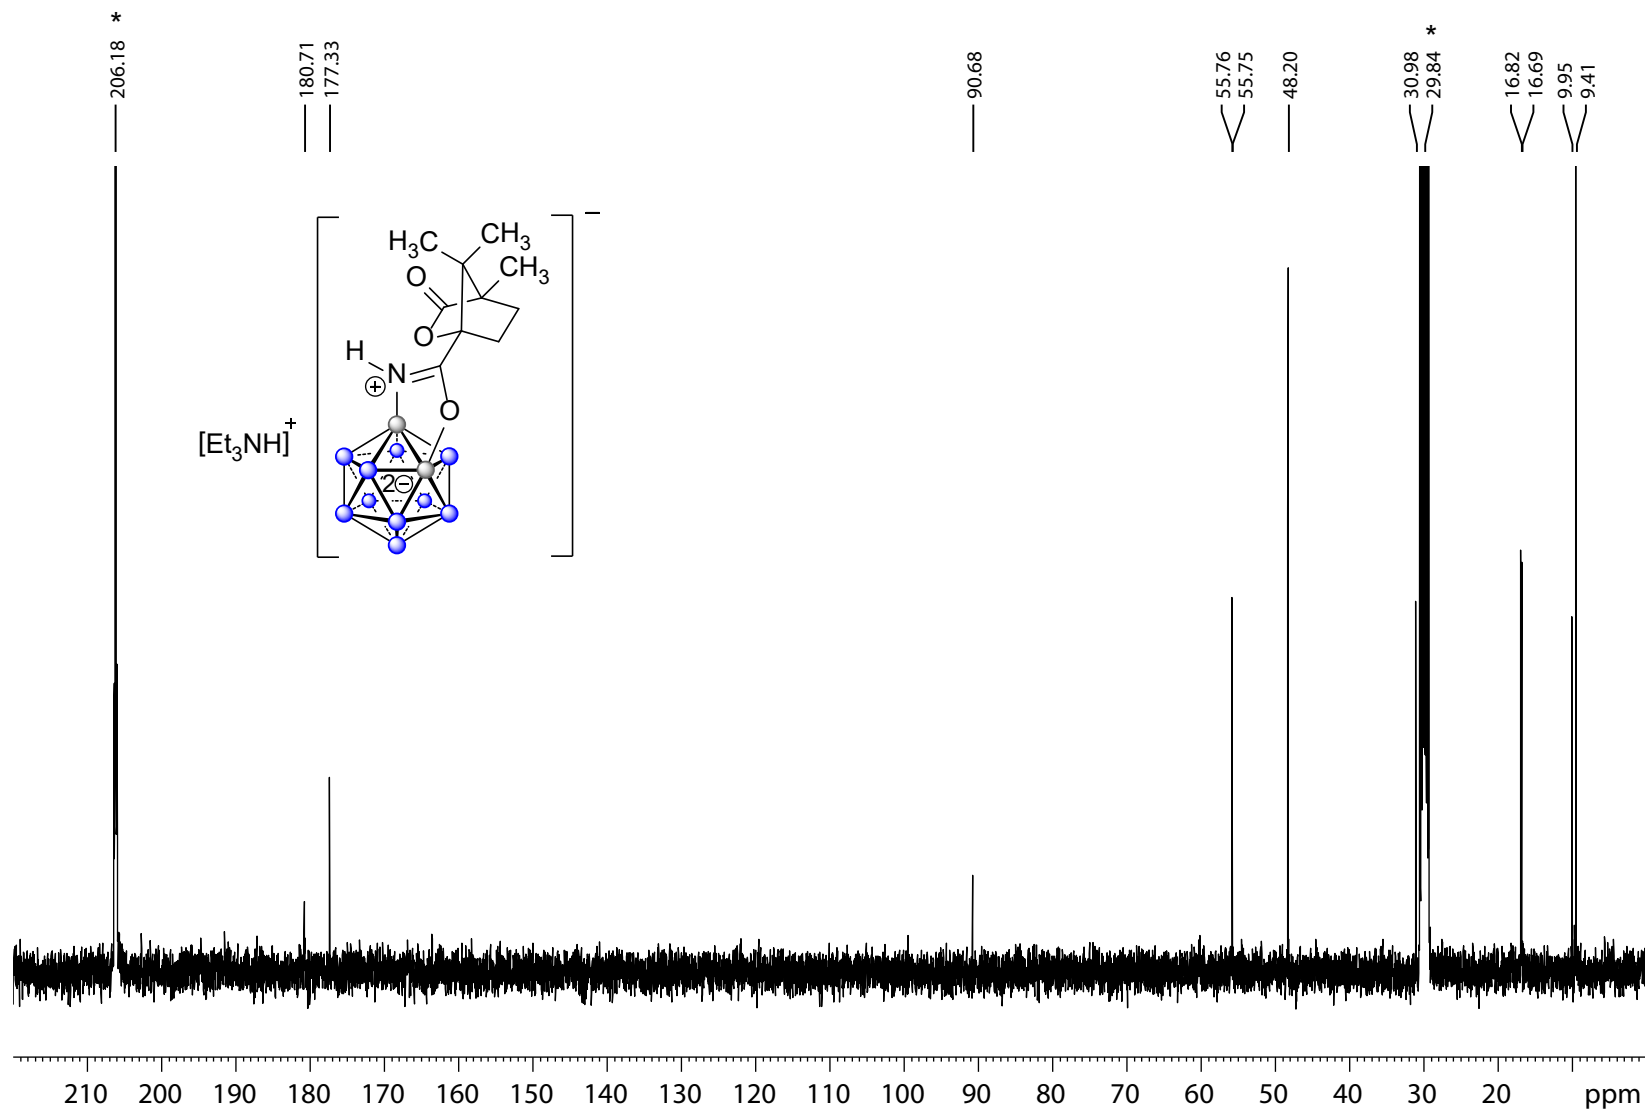

Current Data Parameters  
NAME 20191026-RV-B12C-Cyclizn  
EXPNO 5  
PROCNO 1

F2 - Acquisition Parameters  
Date\_ 20191027  
Time 22.30  
INSTRUM spect  
PROBHD 5 mm PABBO BB/  
PULPROG zgpg30  
TD 65536  
SOLVENT Acetone  
NS 2048  
DS 4  
SWH 29761.904 Hz  
FIDRES 0.454131 Hz  
AQ 1.1010048 sec  
RG 193.34  
DW 16.800 usec  
DE 6.50 usec  
TE 297.8 K  
D1 1.50000000 sec  
D11 0.03000000 sec  
TD0 1

===== CHANNEL f1 =====  
NUC1 13C  
P1 10.00 usec  
PLW1 53.00000000 W  
SFO1 100.6228293 MHz

===== CHANNEL f2 =====  
CPDPRG[2] waltz16  
NUC2 1H  
PCPD2 80.00 usec  
PLW2 12.50000000 W  
PLW12 0.43945000 W  
PLW13 0.28125000 W  
SFO2 400.1316005 MHz

F2 - Processing parameters  
SI 32768  
SF 100.6126789 MHz  
WDW EM  
SSB 0  
LB 1.00 Hz  
GB 0  
PC 1.40

20190226-B12C-cyclizn 20 mg white solid [Et<sub>3</sub>NH][B<sub>12</sub>H<sub>10</sub>NHC(Camphanic)O] dissolved in 0.6 mL acetone-d<sub>6</sub>\*

<sup>13</sup>CDEPT NMR 100 MHz

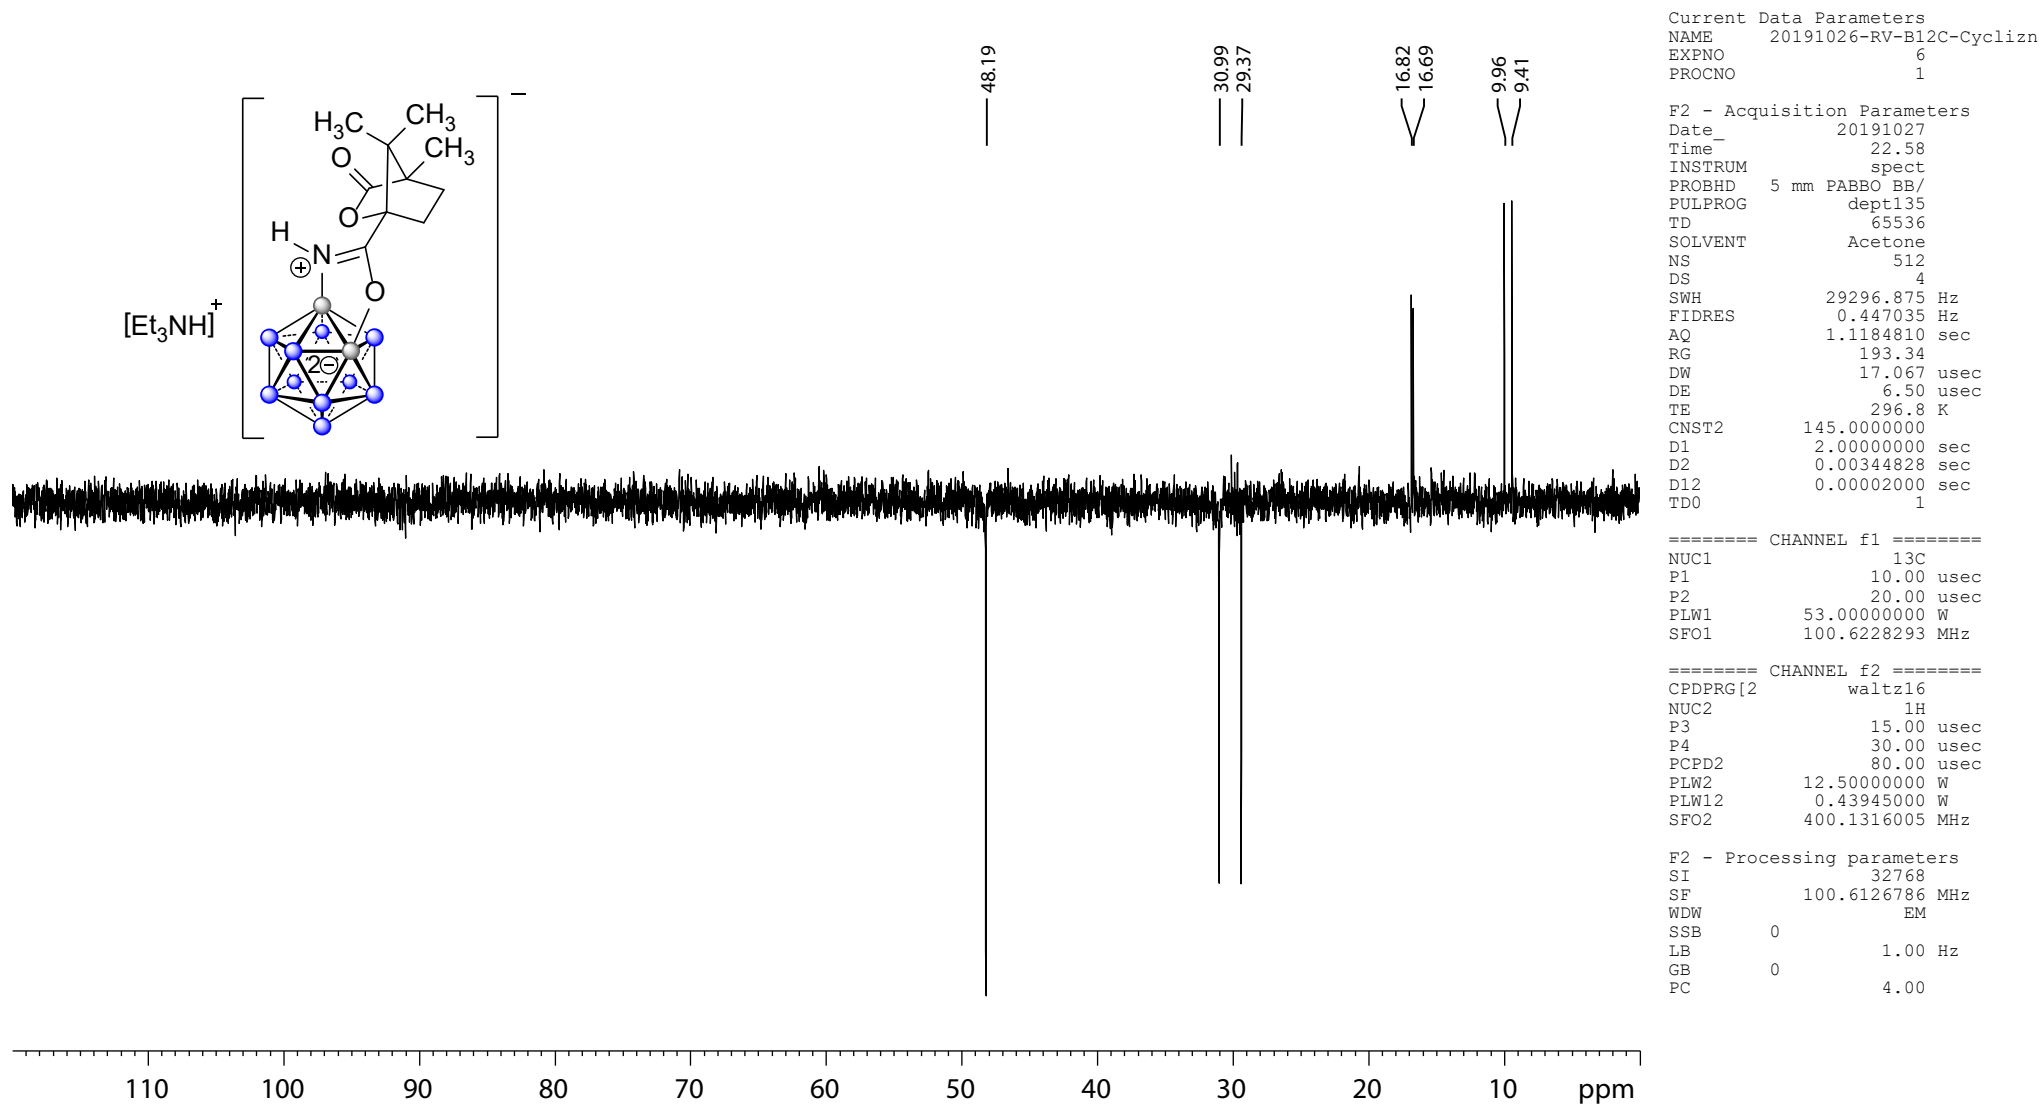

<sup>1</sup>H - <sup>1</sup>H COSY NMR

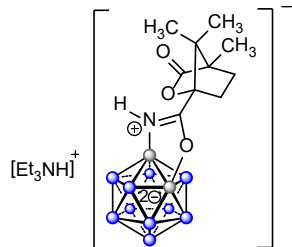

Current Data Parameters  
 NAME 20191026-RV-B12C-Cyclizn  
 EXPNO 8  
 PROCNO 1

F2 - Acquisition Parameters  
 Date\_ 20191027  
 Time\_ 23.14  
 INSTRUM spect  
 PROBHD 5 mm PABBO BB/  
 PULPROG cosygpppqf  
 TD 2048  
 SOLVENT Acetone  
 NS 2  
 DS 8  
 SWH 5341.880 Hz  
 FIDRES 2.608340 Hz  
 AQ 0.1916928 sec  
 RG 193.34  
 DW 93.600 usec  
 DE 6.50 usec  
 TE 297.0 K  
 D0 0.0000300 sec  
 D1 2.00000000 sec  
 D11 0.03000000 sec  
 D12 0.00002000 sec  
 D13 0.00000400 sec  
 D16 0.00020000 sec  
 IN0 0.00018720 sec

===== CHANNEL f1 =====  
 NUC1 1H  
 P0 15.00 usec  
 P1 15.00 usec  
 P17 2500.00 usec  
 PLW1 12.5000000 W  
 PLW10 4.16050005 W  
 SFO1 400.1324057 MHz

===== GRADIENT CHANNEL =====  
 GPNAM[1] SMSQ10.100  
 GPZ1 10.00 %  
 P16 1000.00 usec

F1 - Acquisition parameters  
 TD 128  
 SFO1 400.1324 MHz  
 FIDRES 83.466881 Hz  
 SW 13.350 ppm  
 FnMODE QF

F2 - Processing parameters  
 SI 1024  
 SF 400.1300075 MHz  
 WDW QSINE  
 SSB 0  
 LB 0 Hz  
 GB 0  
 PC 1.40

F1 - Processing parameters  
 SI 1024  
 MC2 QF  
 SF 400.1300078 MHz  
 WDW QSINE  
 SSB 0  
 LB 0 Hz  
 GB 0

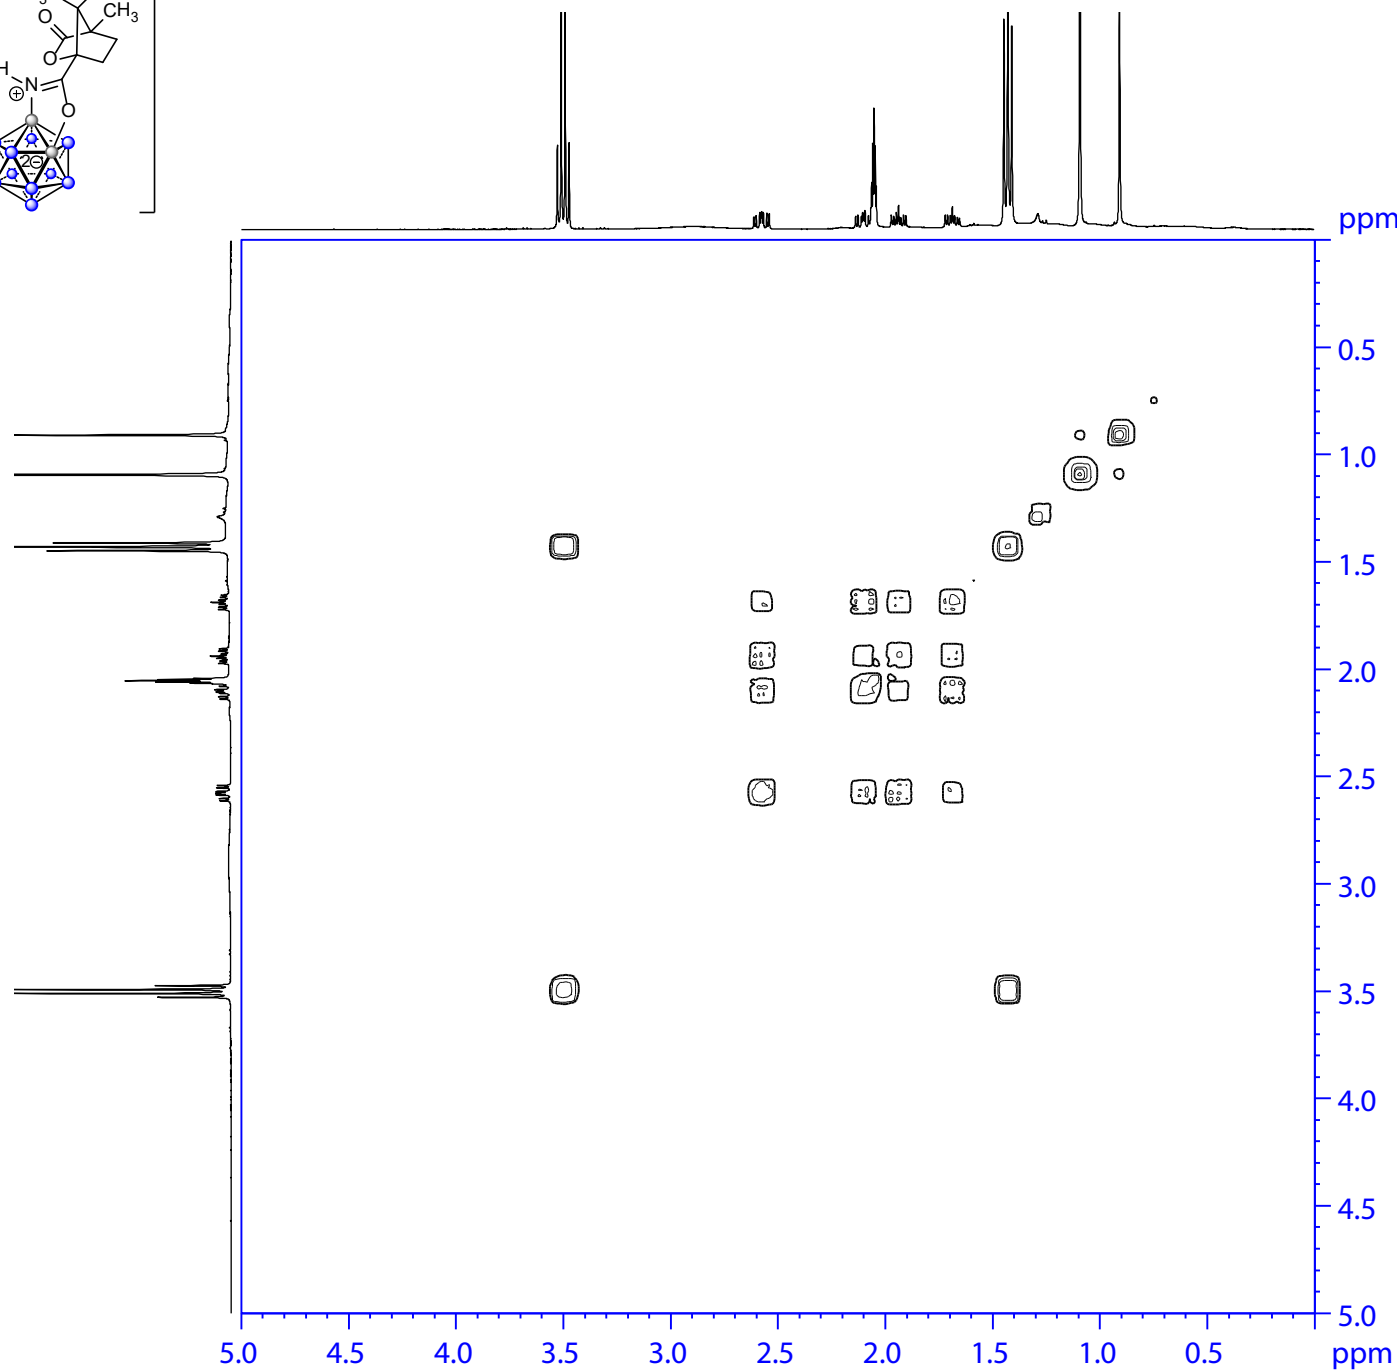

20190226-B12C-cyclizn 20 mg white solid [Et<sub>3</sub>NH][B<sub>12</sub>H<sub>10</sub>NHC(Camphanic)O] dissolved in 0.6 mL acetone-d<sub>6</sub>\*

<sup>1</sup>H - <sup>13</sup>C HSQC NMR

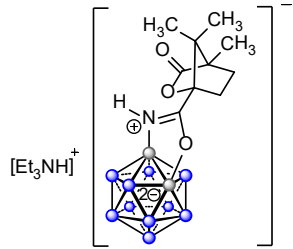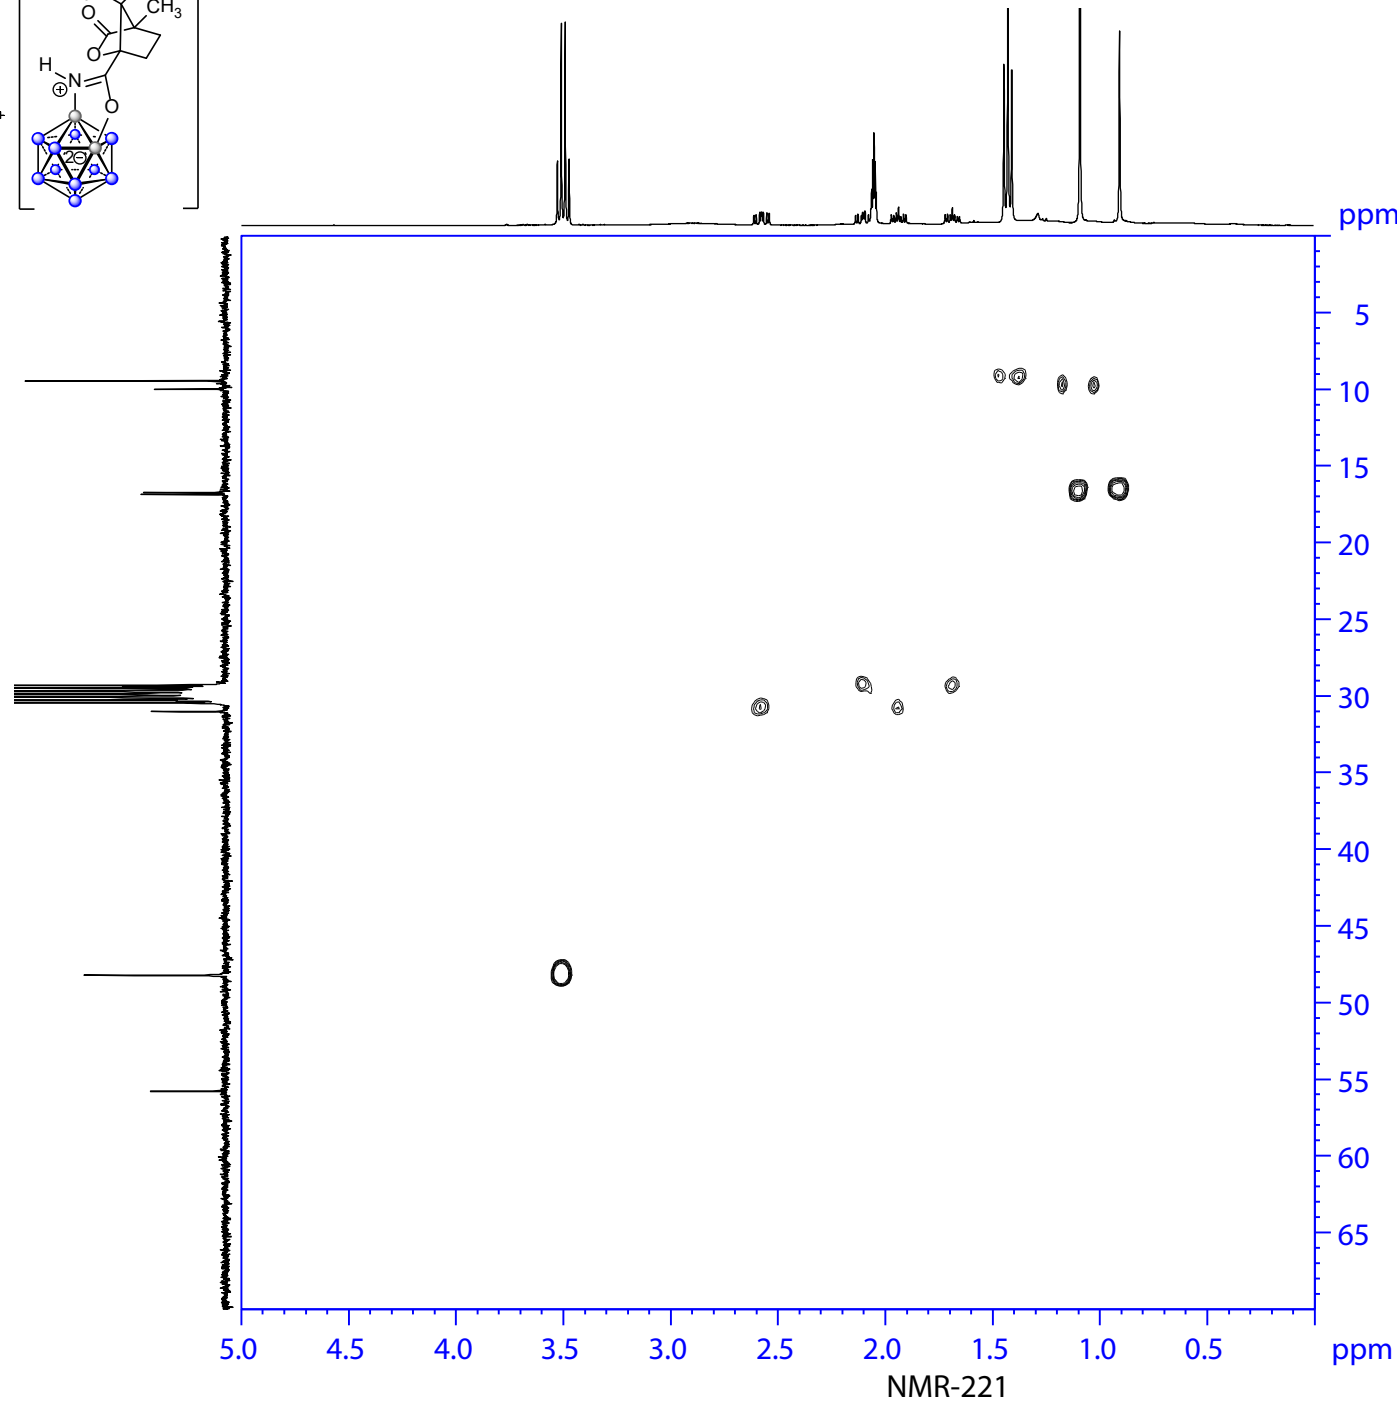

Current Data Parameters  
 NAME 20191026-RV-B12C-Cyclizn  
 EXPNO 7  
 PROCNO 1

F2 - Acquisition Parameters  
 Date\_ 20191027  
 Time 23.00  
 INSTRUM spect  
 PROBHD 5 mm PABBO BB/  
 PULPROG hsqcetpsi2  
 TD 1024  
 SOLVENT Acetone  
 NS 2  
 DS 16  
 SWH 6009.615 Hz  
 FIDRES 5.868765 Hz  
 AQ 0.0851968 sec  
 RG 193.34  
 DW 83.200 usec  
 DE 6.50 usec  
 TE 296.7 K  
 CNST2 145.0000000  
 D0 0.00000300 sec  
 D1 1.50000000 sec  
 D4 0.00172414 sec  
 D11 0.03000000 sec  
 D16 0.00020000 sec  
 D24 0.00086207 sec  
 INO 0.00001990 sec  
 ZGOPTNS

===== CHANNEL f1 =====  
 NUC1 <sup>1</sup>H  
 P1 15.00 usec  
 P2 30.00 usec  
 P28 1000.00 usec  
 PLW1 12.50000000 W  
 SFO1 400.1328009 MHz

===== CHANNEL f2 =====  
 CPDPRG2 garp  
 NUC2 <sup>13</sup>C  
 P3 10.00 usec  
 P4 20.00 usec  
 PCPD2 70.00 usec  
 PLW2 53.00000000 W  
 PLW12 1.08159995 W  
 SFO2 100.6238364 MHz

===== GRADIENT CHANNEL =====  
 GPNAM[1] SMSQ10.100  
 GPNAM[2] SMSQ10.100  
 GPNAM[3] SMSQ10.100  
 GPNAM[4] SMSQ10.100  
 GPZ1 80.00 %  
 GPZ2 20.10 %  
 GPZ3 11.00 %  
 GPZ4 -5.00 %  
 P16 1000.00 usec  
 P19 600.00 usec

F1 - Acquisition parameters  
 TD 256  
 SFO1 100.6238 MHz  
 FIDRES 196.524048 Hz  
 SW 249.991 ppm  
 FwMODE Echo-Antiecho

F2 - Processing parameters  
 SI 1024  
 SF 400.1300041 MHz  
 WDW QSINE  
 SSB 2  
 LB 0 Hz  
 GB 0  
 PC 1.40

F1 - Processing parameters  
 SI 1024  
 MC2 echo-antiecho  
 SF 100.6126732 MHz  
 WDW QSINE  
 SSB 2  
 LB 0 Hz  
 GB 0

20191104-B12M-Cycl 10 mg white solid [Et<sub>3</sub>NH][B<sub>12</sub>H<sub>10</sub>NHC(Menthyl)O] dissolved in 0.6 mL acetone-d<sub>6</sub>\*

400MHz <sup>1</sup>H NMR, o deuterated solvent residual peak= 2.05 ppm; ◇ water peak

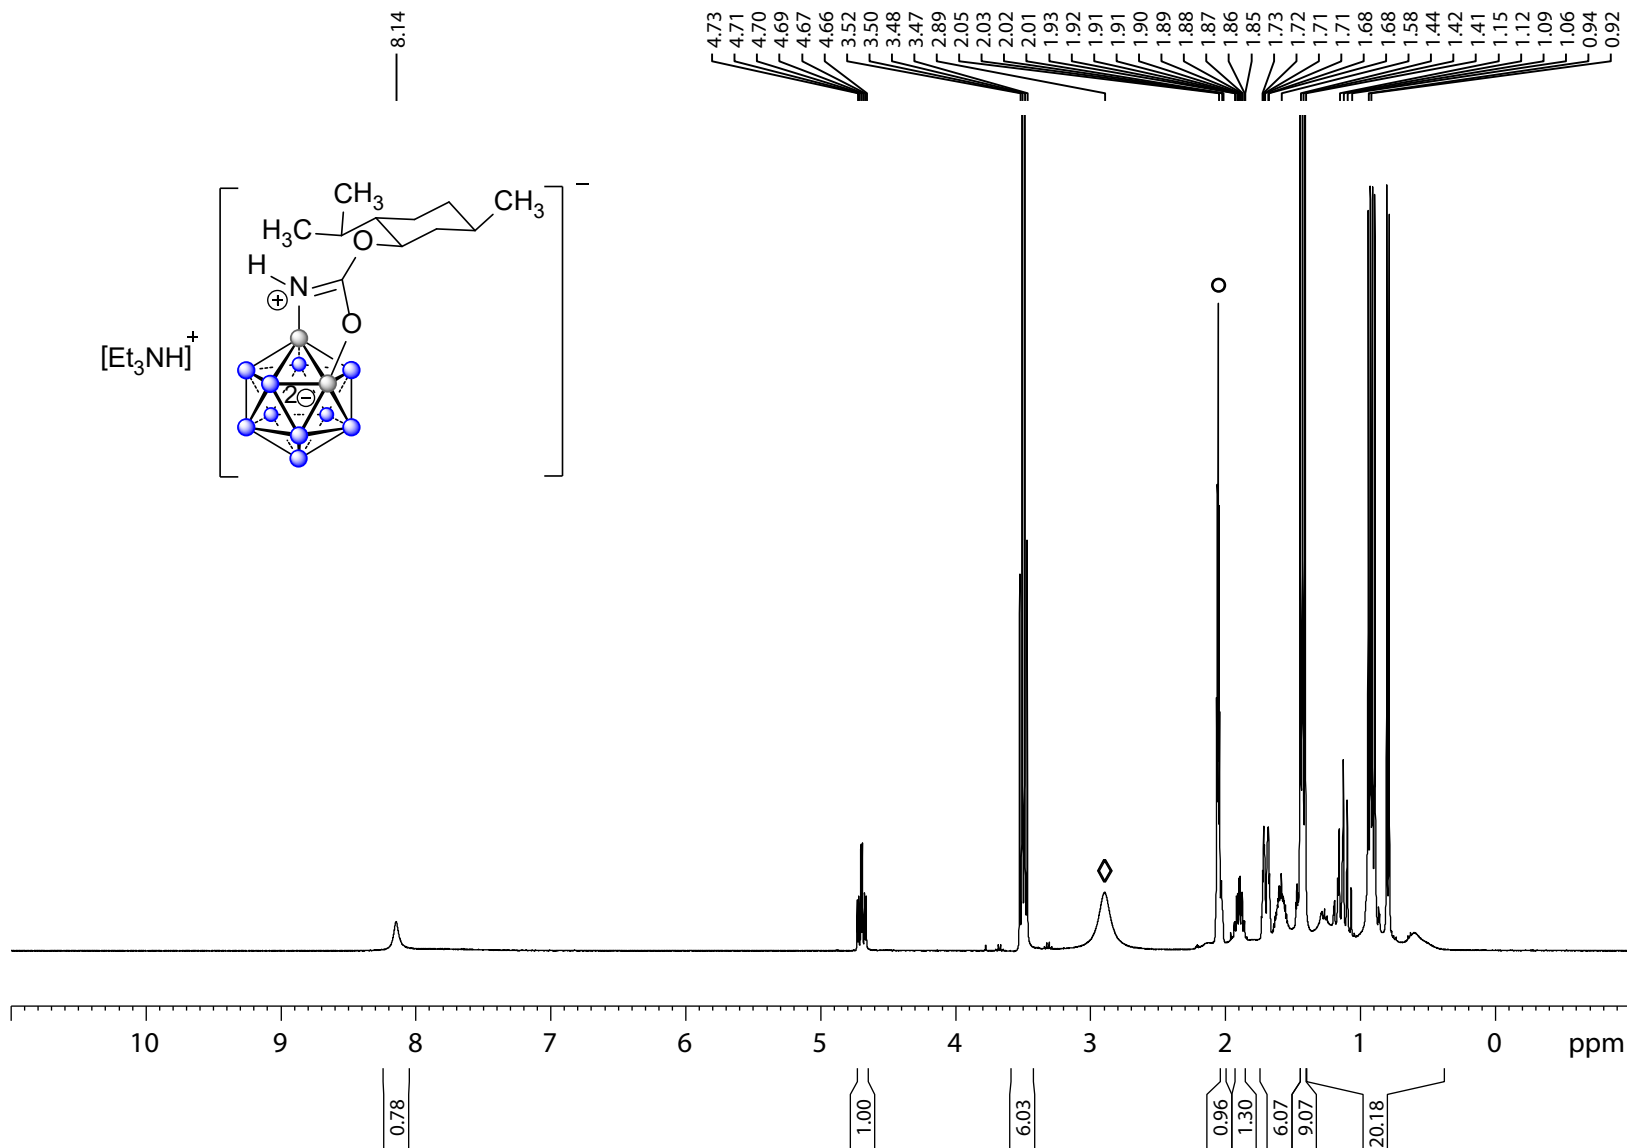

Current Data Parameters  
NAME 20191104-RV-B12M-Cycl  
EXPNO 1  
PROCNO 1

F2 - Acquisition Parameters  
Date\_ 20191105  
Time 16.13  
INSTRUM spect  
PROBHD 5 mm PABBO BB/  
PULPROG zg30  
TD 65536  
SOLVENT Acetone  
NS 16  
DS 2  
SWH 10000.000 Hz  
FIDRES 0.152588 Hz  
AQ 3.2767999 sec  
RG 152.18  
DW 50.000 usec  
DE 6.50 usec  
TE 296.0 K  
D1 1.00000000 sec  
TD0 1

==== CHANNEL f1 =====  
NUC1 1H  
P1 15.00 usec  
PLW1 12.50000000 W  
SFO1 400.1328009 MHz

F2 - Processing parameters  
SI 65536  
SF 400.1300072 MHz  
WDW EM  
SSB 0  
LB 0.30 Hz  
GB 0  
PC 1.00



20191104-B12M-Cycl 10 mg white solid [Et<sub>3</sub>NH][B<sub>12</sub>H<sub>10</sub>NHC(Menthyl)O] dissolved in 0.6 mL acetone-d<sub>6</sub>\*

400MHz <sup>1</sup>H{B} NMR, ◊ deuterated solvent residual peak = 2.05 ppm; ◊ water peak

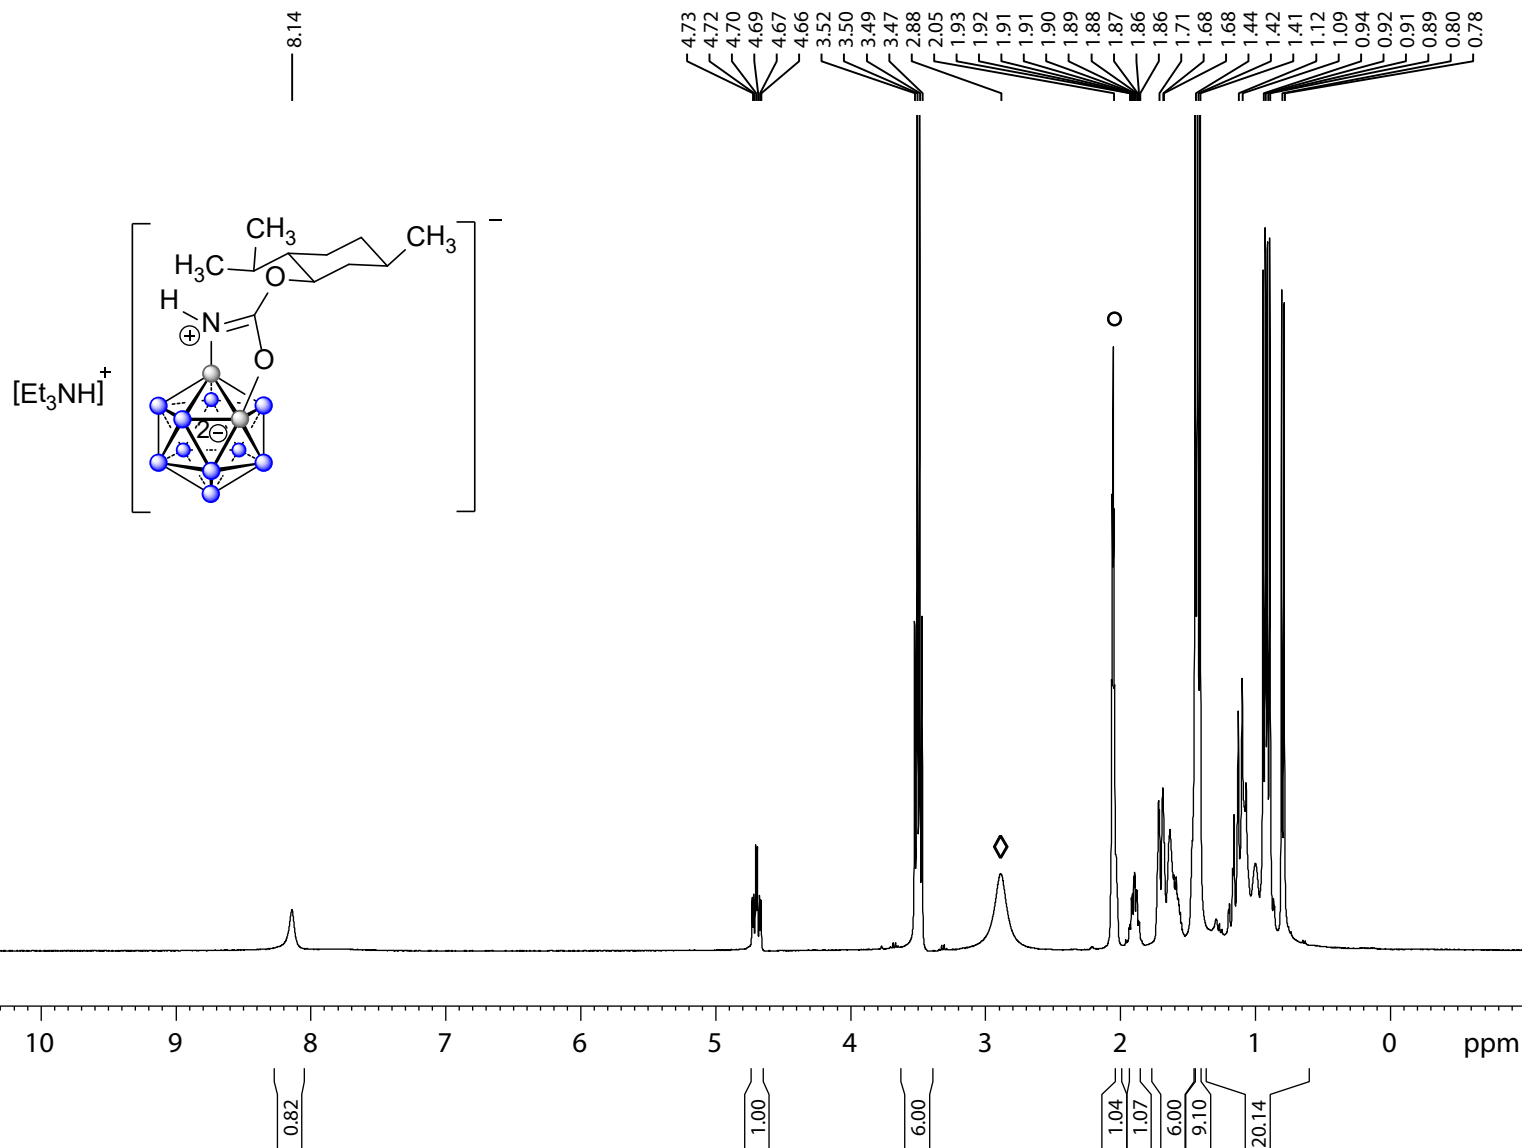

Current Data Parameters  
NAME 20191104-RV-B12M-Cycl  
EXPNO 2  
PROCNO 1

F2 - Acquisition Parameters  
Date\_ 20191105  
Time\_ 16.16  
INSTRUM spect  
PROBHD 5 mm PABBO BB/  
PULPROG zgig30  
TD 16384  
SOLVENT Acetone  
NS 16  
DS 4  
SWH 8012.820 Hz  
FIDRES 0.489064 Hz  
AQ 1.0223616 sec  
RG 107.6  
DW 62.400 usec  
DE 6.50 usec  
TE 296.2 K  
D1 1.00000000 sec  
D11 0.03000000 sec  
TD0 1

==== CHANNEL f1 =====  
NUC1 1H  
P1 15.00 usec  
PLW1 12.50000000 W  
SFO1 400.1320007 MHz

==== CHANNEL f2 =====  
CPDPRG[2] garp4  
NUC2 11B  
PCPD2 90.00 usec  
PLW2 52.96599960 W  
PLW12 0.64477998 W  
SFO2 128.3776050 MHz

F2 - Processing parameters  
SI 32768  
SF 400.1300073 MHz  
WDW EM  
SSB 0  
LB 1.00 Hz  
GB 0  
PC 1.40

20191104-B12M-Cycl 10 mg white solid [Et<sub>3</sub>NH][B<sub>12</sub>H<sub>10</sub>NHC(Menthyl)O] dissolved in 0.6 mL acetone-d<sub>6</sub>\*

<sup>11</sup>B NMR 128 MHz

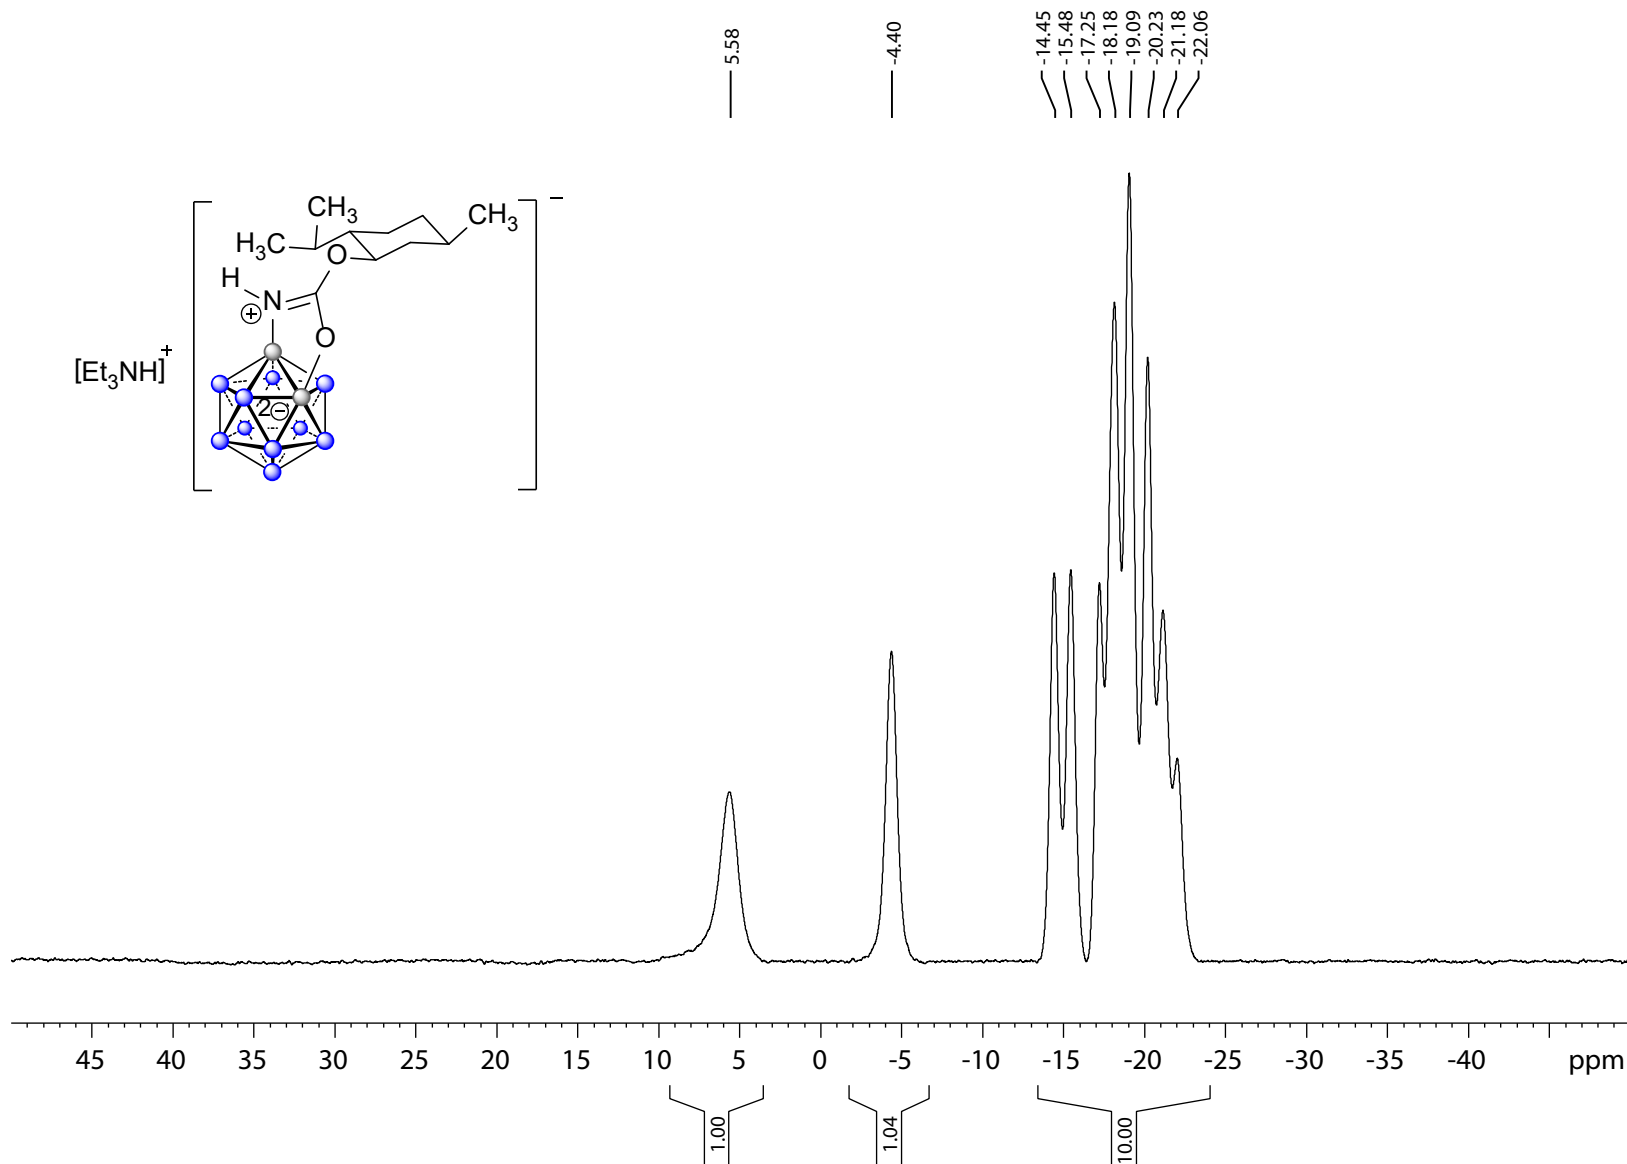

Current Data Parameters  
NAME 20191104-RV-B12M-Cycl  
EXPNO 3  
PROCNO 1

F2 - Acquisition Parameters  
Date\_ 20191105  
Time\_ 16.21  
INSTRUM spect  
PROBHD 5 mm PABBO BB/  
PULPROG zg  
TD 65536  
SOLVENT Acetone  
NS 128  
DS 4  
SWH 25510.203 Hz  
FIDRES 0.389255 Hz  
AQ 1.2845056 sec  
RG 193.34  
DW 19.600 usec  
DE 6.50 usec  
TE 296.2 K  
D1 1.0000000 sec  
TD0 1

==== CHANNEL f1 =====  
NUC1 11B  
P1 9.93 usec  
PLW1 52.96599960 W  
SFO1 128.3776052 MHz

F2 - Processing parameters  
SI 32768  
SF 128.3776050 MHz  
WDW EM  
SSB 0  
LB 10.00 Hz  
GB 0  
PC 1.40

20191104-B12M-Cycl 10 mg white solid  $[\text{Et}_3\text{NH}][\text{B}_{12}\text{H}_{10}\text{NHC}(\text{Menthy})\text{O}]$  dissolved in 0.6 mL acetone- $d_6$ \*

$^{11}\text{B}\{\text{H}\}$  NMR 128 MHz

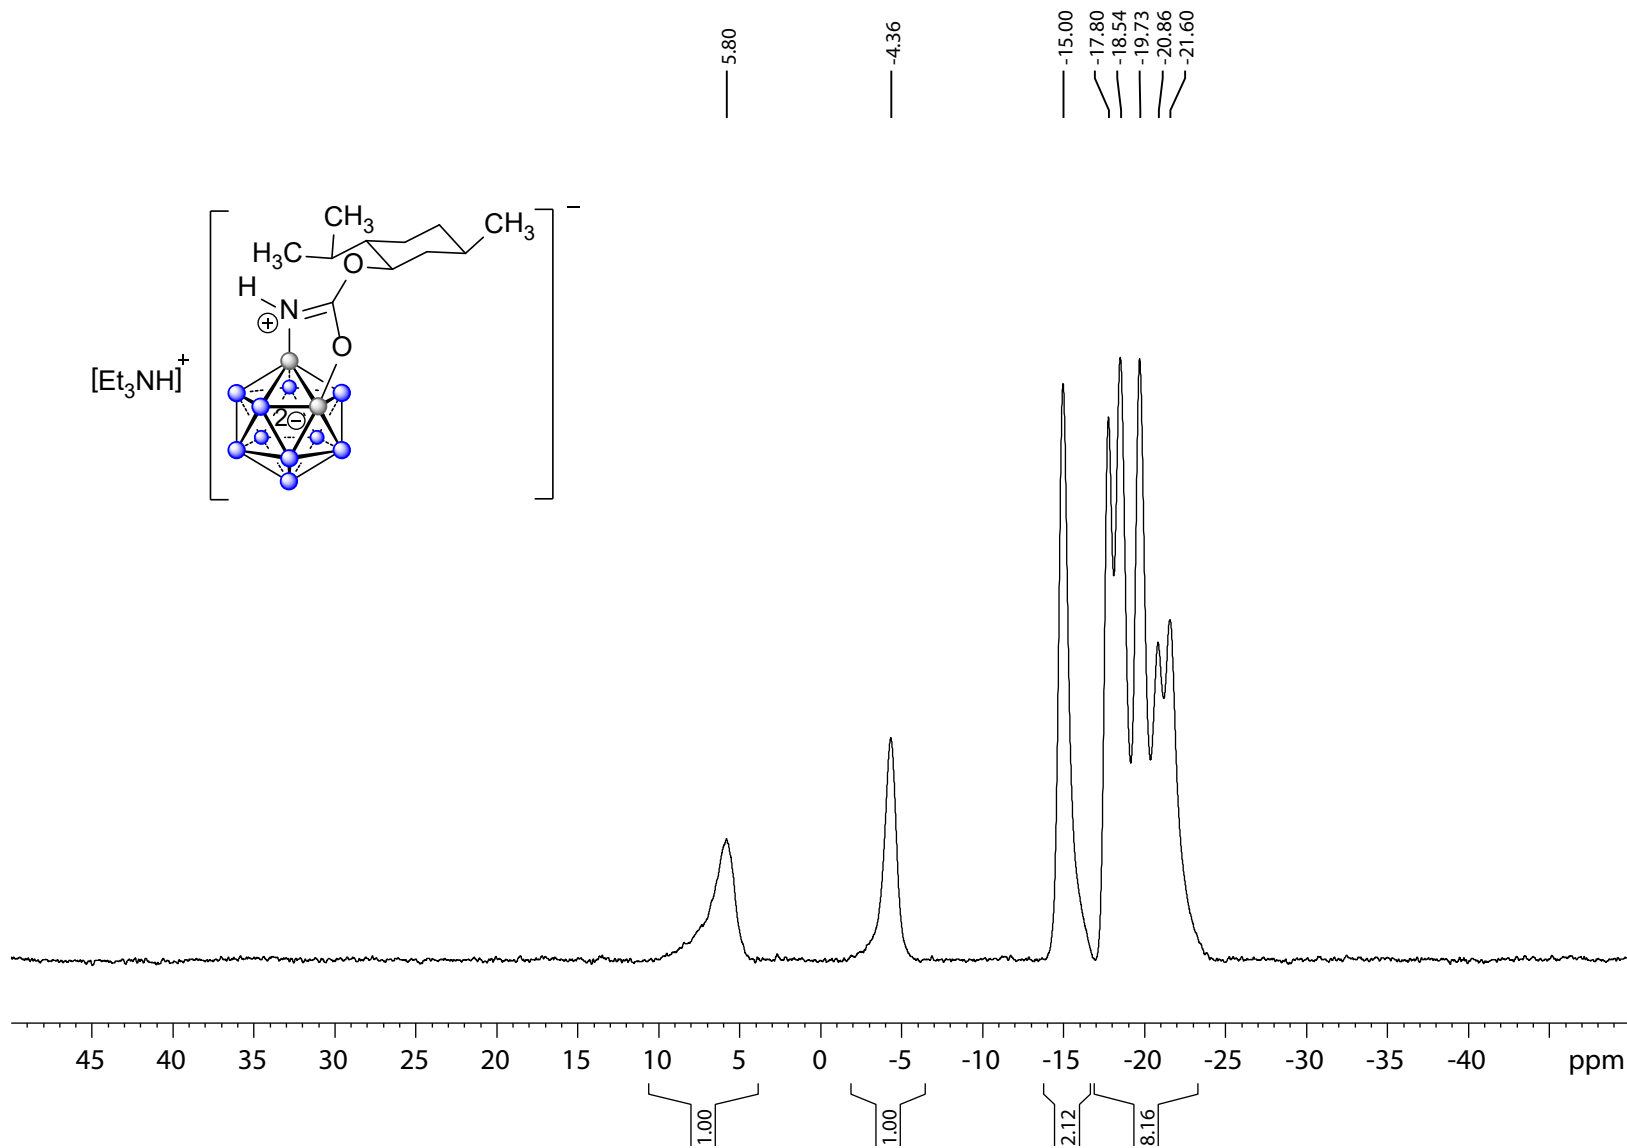

Current Data Parameters  
 NAME 20191104-RV-B12M-Cycl  
 EXPNO 4  
 PROCNO 1

F2 - Acquisition Parameters  
 Date\_ 20191105  
 Time\_ 16.27  
 INSTRUM spect  
 PROBHD 5 mm PABBO BB/  
 PULPROG zgpg30  
 TD 65536  
 SOLVENT Acetone  
 NS 128  
 DS 4  
 SWH 25510.203 Hz  
 FIDRES 0.389255 Hz  
 AQ 1.2845056 sec  
 RG 193.34  
 DW 19.600 usec  
 DE 6.50 usec  
 TE 297.2 K  
 D1 1.00000000 sec  
 D11 0.03000000 sec  
 TD0 1

===== CHANNEL f1 =====  
 NUC1 11B  
 P1 9.93 usec  
 PLW1 52.96599960 W  
 SFO1 128.3776050 MHz

===== CHANNEL f2 =====  
 CPDPRG[2] waltz16  
 NUC2 1H  
 PCPD2 80.00 usec  
 PLW2 12.50000000 W  
 PLW12 0.43945000 W  
 PLW13 0.28125000 W  
 SFO2 400.1320007 MHz

F2 - Processing parameters  
 SI 32768  
 SF 128.3776050 MHz  
 WDW EM  
 SSB 0  
 LB 10.00 Hz  
 GB 0  
 PC 1.40



20191104-B12M-Cycl 10 mg white solid [Et<sub>3</sub>NH][B<sub>12</sub>H<sub>10</sub>NHC(Menthyl)O] dissolved in 0.6 mL acetone-d<sub>6</sub>\*

<sup>13</sup>CDEPT NMR 100 MHz

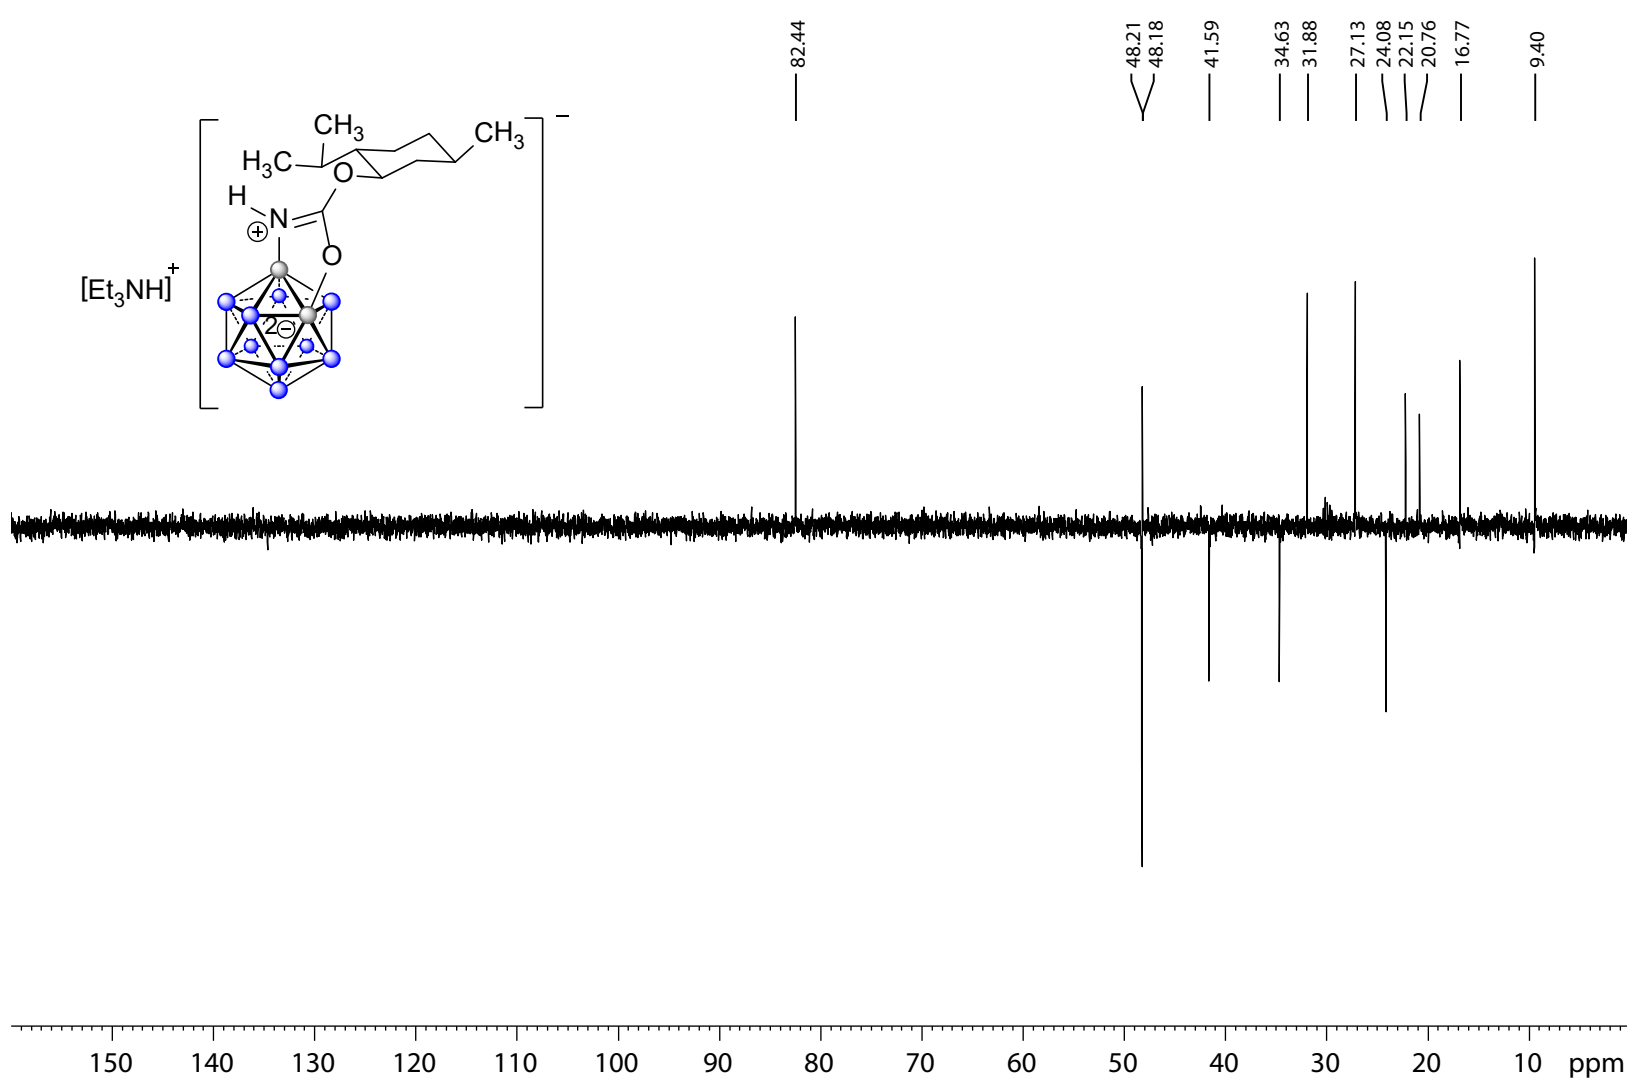

Current Data Parameters  
NAME 20191104-RV-B12M-Cycl  
EXPNO 6  
PROCNO 1

F2 - Acquisition Parameters  
Date\_ 20191105  
Time\_ 18.28  
INSTRUM spect  
PROBHD 5 mm PABBO BB/  
PULPROG dept135  
TD 65536  
SOLVENT Acetone  
NS 512  
DS 4  
SWH 29296.875 Hz  
FIDRES 0.447035 Hz  
AQ 1.1184810 sec  
RG 193.34  
DW 17.067 usec  
DE 6.50 usec  
TE 297.1 K  
CNST2 145.0000000  
D1 2.00000000 sec  
D2 0.00344828 sec  
D12 0.00002000 sec  
TD0 1

==== CHANNEL f1 =====  
NUC1 13C  
P1 10.00 usec  
P2 20.00 usec  
PLW1 53.00000000 W  
SFO1 100.6228293 MHz

==== CHANNEL f2 =====  
CPDPRG[2] waltz16  
NUC2 1H  
P3 15.00 usec  
P4 30.00 usec  
PCPD2 80.00 usec  
PLW2 12.50000000 W  
PLW12 0.43945000 W  
SFO2 400.1316005 MHz

F2 - Processing parameters  
SI 32768  
SF 100.6126792 MHz  
WDW EM  
SSB 0  
LB 1.00 Hz  
GB 0  
PC 4.00

20191104-B12M-Cycl 10 mg white solid [Et<sub>3</sub>NH][B<sub>12</sub>H<sub>10</sub>NHC(Menthyl)O] dissolved in 0.6 mL acetone-d<sub>6</sub>\*

<sup>1</sup>H - <sup>1</sup>H COSY NMR

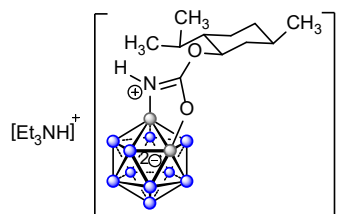

Current Data Parameters  
 NAME 20191104-RV-B12M-Cycl  
 EXPNO 7  
 PROCNO 1

F2 - Acquisition Parameters  
 Date\_ 20191105  
 Time\_ 18.29  
 INSTRUM spect  
 PROBHD 5 mm PABBO BB/  
 PULPROG cosygpppqf  
 TD 2048  
 SOLVENT Acetone  
 NS 2  
 DS 8  
 SWH 5341.880 Hz  
 FIDRES 2.608340 Hz  
 AQ 0.1916928 sec  
 RG 193.34  
 DW 93.600 usec  
 DE 6.50 usec  
 TE 297.0 K  
 D0 0.0000300 sec  
 D1 2.0000000 sec  
 D11 0.0300000 sec  
 D12 0.0000200 sec  
 D13 0.0000400 sec  
 D16 0.0002000 sec  
 IN0 0.00018720 sec

==== CHANNEL f1 =====  
 NUC1 1H  
 P0 15.00 usec  
 P1 15.00 usec  
 P17 2500.00 usec  
 PLW1 12.5000000 W  
 PLW10 4.16050005 W  
 SFO1 400.1324057 MHz

===== GRADIENT CHANNEL =====  
 GPNAM[1] SMSQ10.100  
 GPZ1 10.00 %  
 P16 1000.00 usec

F1 - Acquisition parameters  
 TD 128  
 SFO1 400.1324 MHz  
 FIDRES 83.466881 Hz  
 SW 13.350 ppm  
 FmMODE QF

F2 - Processing parameters  
 SI 1024  
 SF 400.1300094 MHz  
 WDW QSINE  
 SSB 0  
 LB 0 Hz  
 GB 0  
 PC 1.40

F1 - Processing parameters  
 SI 1024  
 MC2 QF  
 SF 400.1300097 MHz  
 WDW QSINE  
 SSB 0  
 LB 0 Hz  
 GB 0

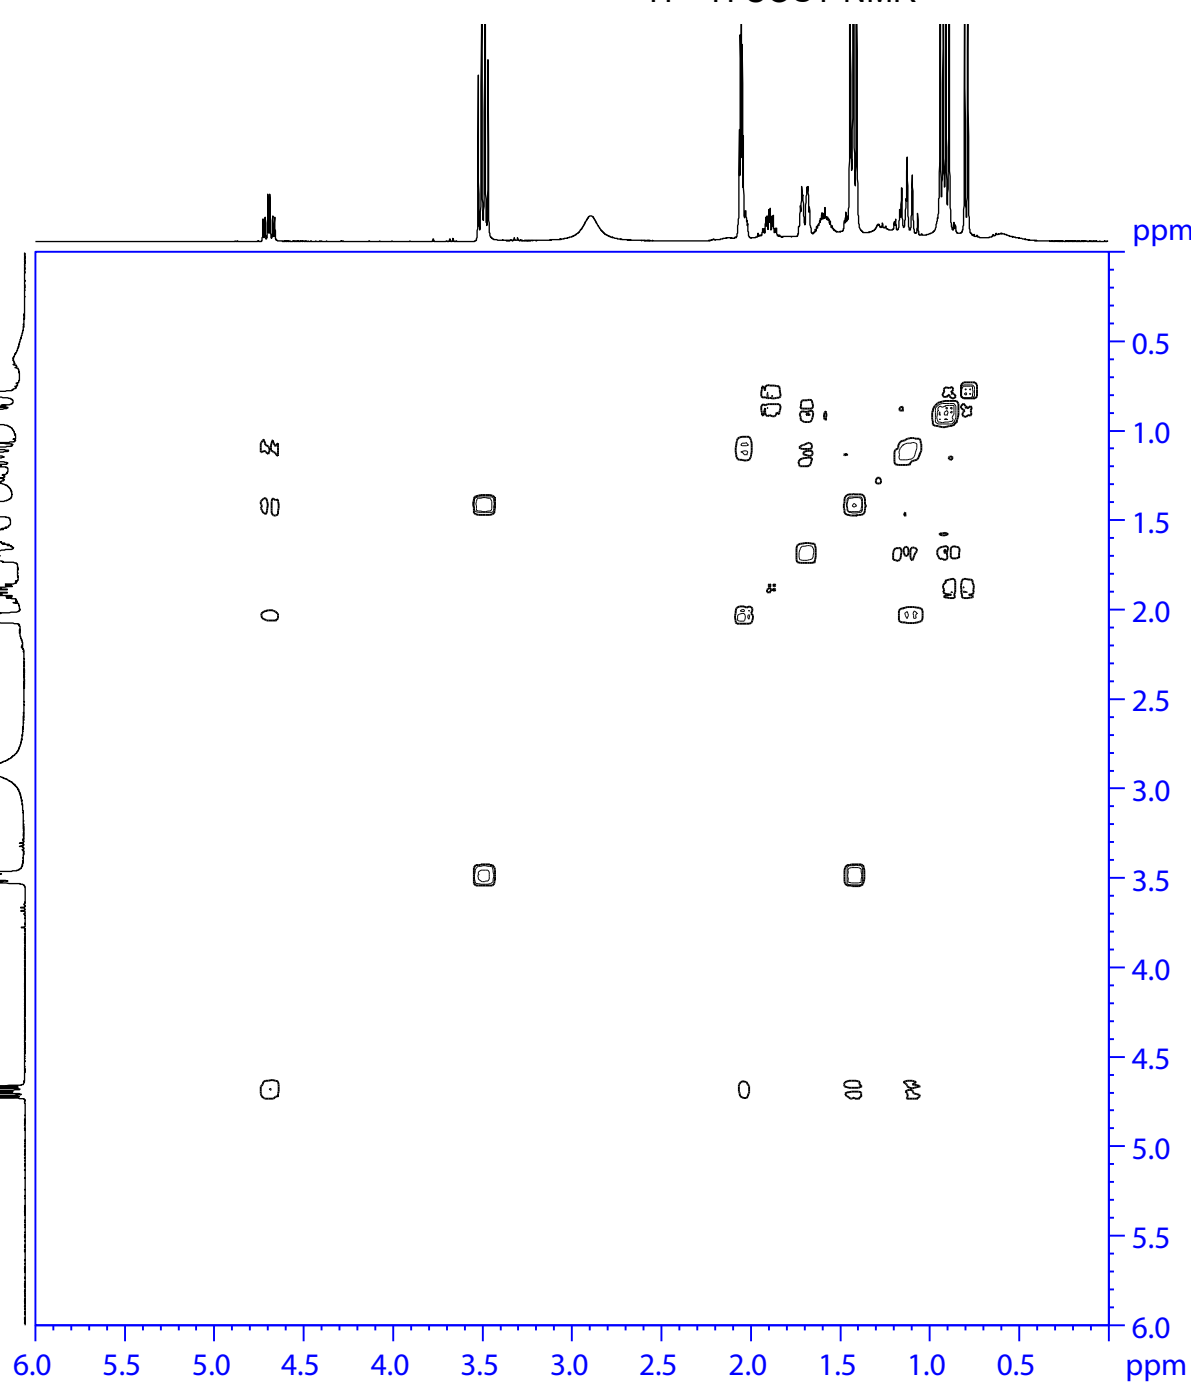

<sup>1</sup>H - <sup>13</sup>C HSQC NMR

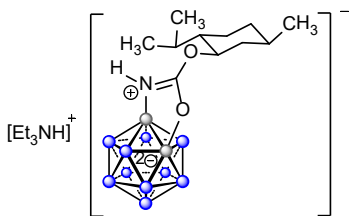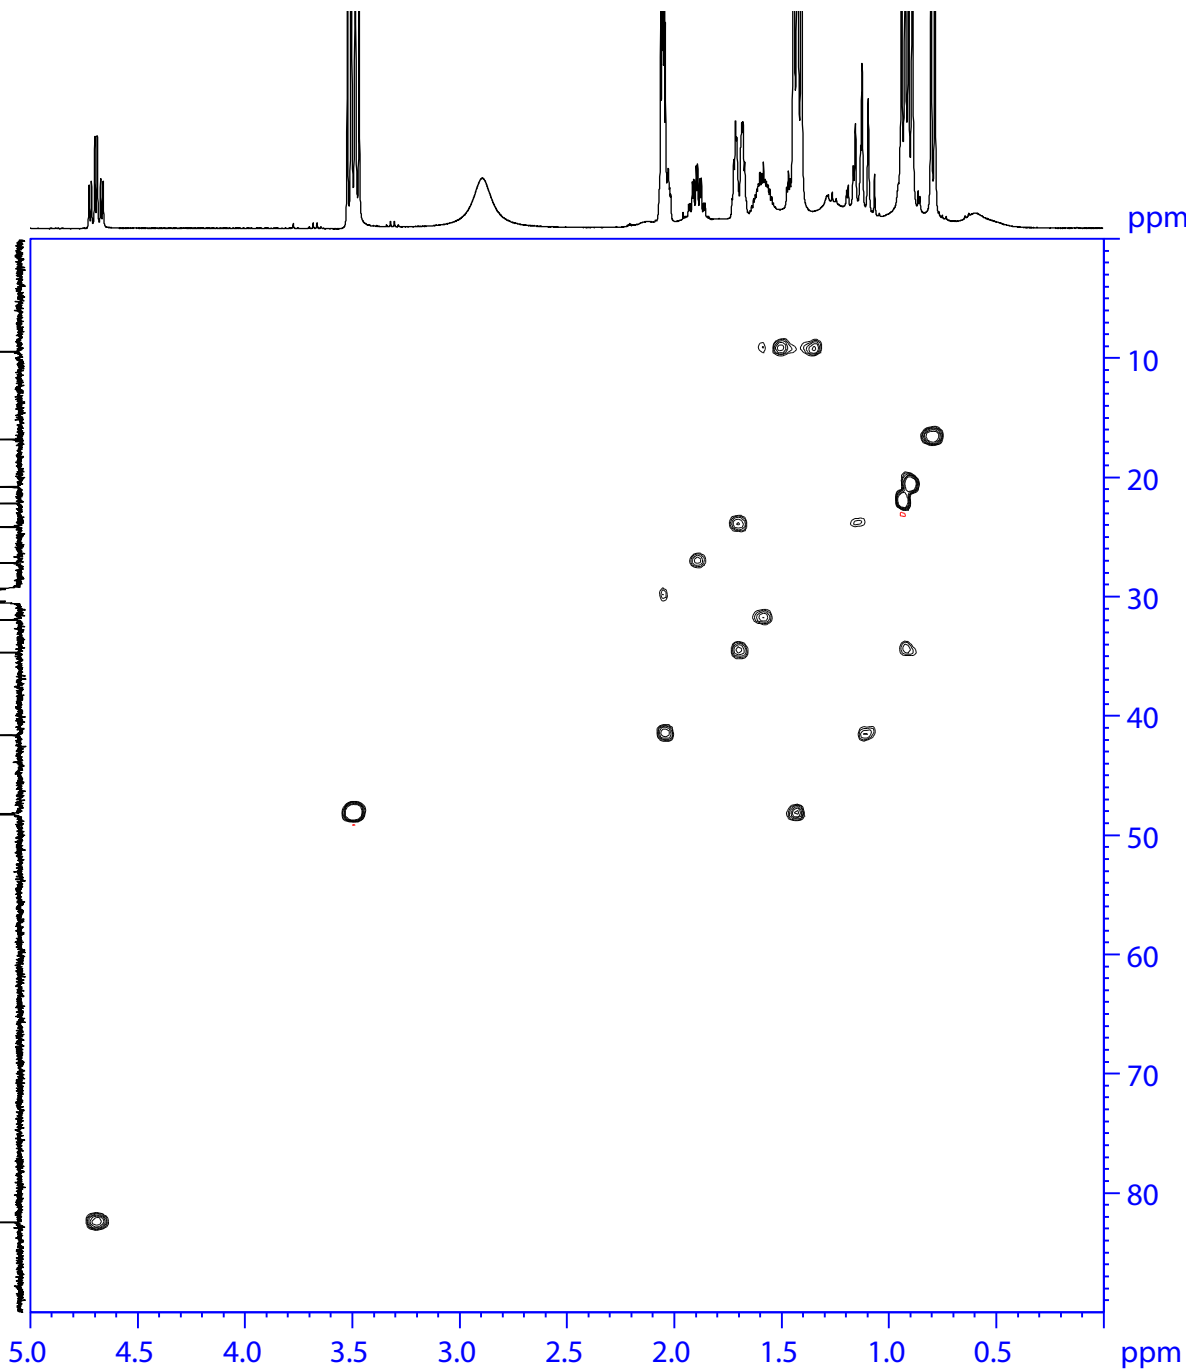

Current Data Parameters  
 NAME 20191104-RV-B12M-Cycl  
 EXPNO 8  
 PROCNO 1

F2 - Acquisition Parameters  
 Date\_ 20191105  
 Time 18.40  
 INSTRUM spect  
 PROBHD 5 mm PABBO BB/  
 PULPROG hsqcetgps12  
 TD 1024  
 SOLVENT Acetone  
 NS 2  
 DS 16  
 SWH 6009.615 Hz  
 FIDRES 5.868765 Hz  
 AQ 0.0851968 sec  
 RG 193.34  
 DW 83.200 usec  
 DE 6.50 usec  
 TE 297.0 K  
 CNST2 145.0000000  
 D0 0.0000300 sec  
 D1 1.50000000 sec  
 D4 0.00172414 sec  
 D11 0.03000000 sec  
 D16 0.00020000 sec  
 D24 0.00086207 sec  
 IN0 0.00001990 sec  
 ZGOPTNS

===== CHANNEL f1 =====  
 NUC1 1H  
 P1 15.00 usec  
 P2 30.00 usec  
 P28 1000.00 usec  
 PLW1 12.50000000 W  
 SFO1 400.1328009 MHz

===== CHANNEL f2 =====  
 CPDPRG2 gapp  
 NUC2 13C  
 P3 10.00 usec  
 P4 20.00 usec  
 PCPD2 70.00 usec  
 PLW2 53.00000000 W  
 PLW12 1.08159995 W  
 SFO2 100.6238364 MHz

===== GRADIENT CHANNEL =====  
 GPNAM[1] SMSQ10.100  
 GPNAM[2] SMSQ10.100  
 GPNAM[3] SMSQ10.100  
 GPNAM[4] SMSQ10.100  
 GPZ1 80.00 %  
 GPZ2 20.10 %  
 GPZ3 11.00 %  
 GPZ4 -5.00 %  
 P16 1000.00 usec  
 P19 600.00 usec

F1 - Acquisition parameters  
 TD 256  
 SFO1 100.6238 MHz  
 FIDRES 196.524048 Hz  
 SW 249.991 ppm  
 FhMODE Echo-Antiecho

F2 - Processing parameters  
 SI 1024  
 SF 400.1300061 MHz  
 WDW QSINE  
 SSB 2  
 LB 0 Hz  
 GB 0  
 PC 1.40

F1 - Processing parameters  
 SI 1024  
 MC2 echo-antiecho  
 SF 100.6126725 MHz  
 WDW QSINE  
 SSB 2  
 LB 0 Hz  
 GB 0

## Determination of Diastereomeric Ratios

Diastereomeric ratios *dr* of the products **13** and **14** were determined using the NMR integrals of three signals for which the compounds showed distinct resonances: For **13**,  $\delta(^1\text{H})$  0.92 ppm,  $\delta(^{13}\text{C})$  32 ppm and  $\delta(^{13}\text{C})$  37 ppm; for **14**,  $\delta(^1\text{H})$  0.79 ppm,  $\delta(^{13}\text{C})$  21 ppm and  $\delta(^{13}\text{C})$  82 ppm. The data are shown in Table S3, and details of the spectra are displayed following Table S3.

**Table S3.** Data of relative integration for products **13** and **14** and the resulting average *dr*.

|              | <sup>1</sup> H relative integration |               |           | <sup>13</sup> C relative integration |               |           | <sup>13</sup> C relative integration |               |           | Average <i>dr</i> |
|--------------|-------------------------------------|---------------|-----------|--------------------------------------|---------------|-----------|--------------------------------------|---------------|-----------|-------------------|
|              | $\delta$ 0.92                       | $\delta$ 0.90 | <i>dr</i> | $\delta$ 37.5                        | $\delta$ 37.3 | <i>dr</i> | $\delta$ 32.0                        | $\delta$ 31.5 | <i>dr</i> |                   |
| <b>13a</b>   | 72                                  | 28            | 72:28     | 73                                   | 27            | 73:27     | 27                                   | 73            | 73:27     | <b>73:27</b>      |
| <b>13b</b>   | 66                                  | 34            | 66:34     | 66                                   | 34            | 66:34     | 33                                   | 67            | 67:33     | <b>66:34</b>      |
| <b>13c</b>   | 60                                  | 40            | 60:40     | 60                                   | 40            | 60:40     | 40                                   | 60            | 60:40     | <b>60:40</b>      |
| <b>13d</b>   | 83                                  | 17            | 83:17     | 83                                   | 17            | 83:17     | 13                                   | 87            | 87:13     | <b>84:16</b>      |
| <b>13e</b>   | 55                                  | 45            | 55:45     | 55                                   | 45            | 55:45     | 47                                   | 53            | 53:47     | <b>52:48</b>      |
| <b>13f</b>   | 92                                  | 8             | 92:8      | 92                                   | 8             | 92:8      | 10                                   | 90            | 90:10     | <b>91:09</b>      |
| <b>13g</b>   | 88                                  | 12            | 88:12     | 89                                   | 11            | 89:11     | 8                                    | 92            | 92:8      | <b>90:10</b>      |
| <b>13h</b>   | 72                                  | 28            | 72:28     | 72                                   | 28            | 72:28     | 28                                   | 72            | 72:28     | <b>72:28</b>      |
| <b>13i</b>   | 75                                  | 25            | 75:25     | 74                                   | 26            | 74:26     | 28                                   | 72            | 72:28     | <b>74:26</b>      |
| <b>13j*</b>  | -                                   | -             | -         | 66                                   | 34            | 66:34     | 34                                   | 66            | 66:34     | <b>66:34</b>      |
| <b>13k</b>   | 55                                  | 45            | 55:45     | 55                                   | 45            | 55:45     | 45                                   | 55            | 55:45     | <b>55:45</b>      |
|              | <sup>1</sup> H relative integration |               |           | <sup>13</sup> C relative integration |               |           | <sup>13</sup> C relative integration |               |           | Average <i>dr</i> |
|              | $\delta$ 0.82                       | $\delta$ 0.78 | <i>dr</i> | $\delta$ 82.4                        | $\delta$ 82.2 | <i>dr</i> | $\delta$ 20.8                        | $\delta$ 20.7 | <i>dr</i> |                   |
| <b>14a</b>   | 25                                  | 75            | 75:25     | 74                                   | 26            | 74:26     | 24                                   | 76            | 76:24     | <b>75:25</b>      |
| <b>14b</b>   | 27                                  | 73            | 73:27     | 72                                   | 28            | 72:28     | 26                                   | 74            | 74:26     | <b>73:27</b>      |
| <b>14c*</b>  | -                                   | -             | -         | 78                                   | 22            | 78:22     | 20                                   | 80            | 80:20     | <b>79:21</b>      |
| <b>14d</b>   | 22                                  | 78            | 78:22     | 79                                   | 21            | 79:21     | 21                                   | 79            | 79:21     | <b>79:21</b>      |
| <b>14e*</b>  | 32                                  | 68            | 68:32     | 72                                   | 28            | 72:28     | 28                                   | 72            | 72:28     | <b>72:28</b>      |
| <b>14f**</b> | 15                                  | 85            | 85:15     | 85                                   | 15            | 85:15     | 14                                   | 86            | 86:14     | <b>85:15</b>      |
| <b>14g</b>   | 15                                  | 85            | 85:15     | 84                                   | 16            | 84:16     | 15                                   | 85            | 85:15     | <b>85:15</b>      |
| <b>14h</b>   | 31                                  | 69            | 69:31     | 68                                   | 32            | 68:32     | 32                                   | 68            | 68:32     | <b>68:32</b>      |
| <b>14i</b>   | 29                                  | 71            | 71:29     | 71                                   | 29            | 71:29     | 29                                   | 71            | 71:29     | <b>71:29</b>      |
| <b>14j</b>   | 29                                  | 71            | 71:29     | 70                                   | 30            | 70:30     | 30                                   | 70            | 70:30     | <b>70:30</b>      |
| <b>14k*</b>  | -                                   | -             | -         | 72                                   | 28            | 72:28     | 28                                   | 72            | 72:28     | <b>72:28</b>      |
| <b>14l*</b>  | -                                   | -             | -         | 50                                   | 50            | 50:50     | 50                                   | 50            | 50:50     | <b>50:50</b>      |
| <b>14m*</b>  | -                                   | -             | -         | 50                                   | 50            | 50:50     | 52                                   | 48            | 52:48     | <b>51:49</b>      |
| <b>14n*</b>  | -                                   | -             | -         | 50                                   | 50            | 50:50     | 50                                   | 50            | 50:50     | <b>50:50</b>      |

\* Signal overlap did not allow for accurate determination of relative <sup>1</sup>H integrals.

\*\* <sup>1</sup>H signals at  $\delta$  7.26 and  $\delta$  7.22 were used.



# Product 13a

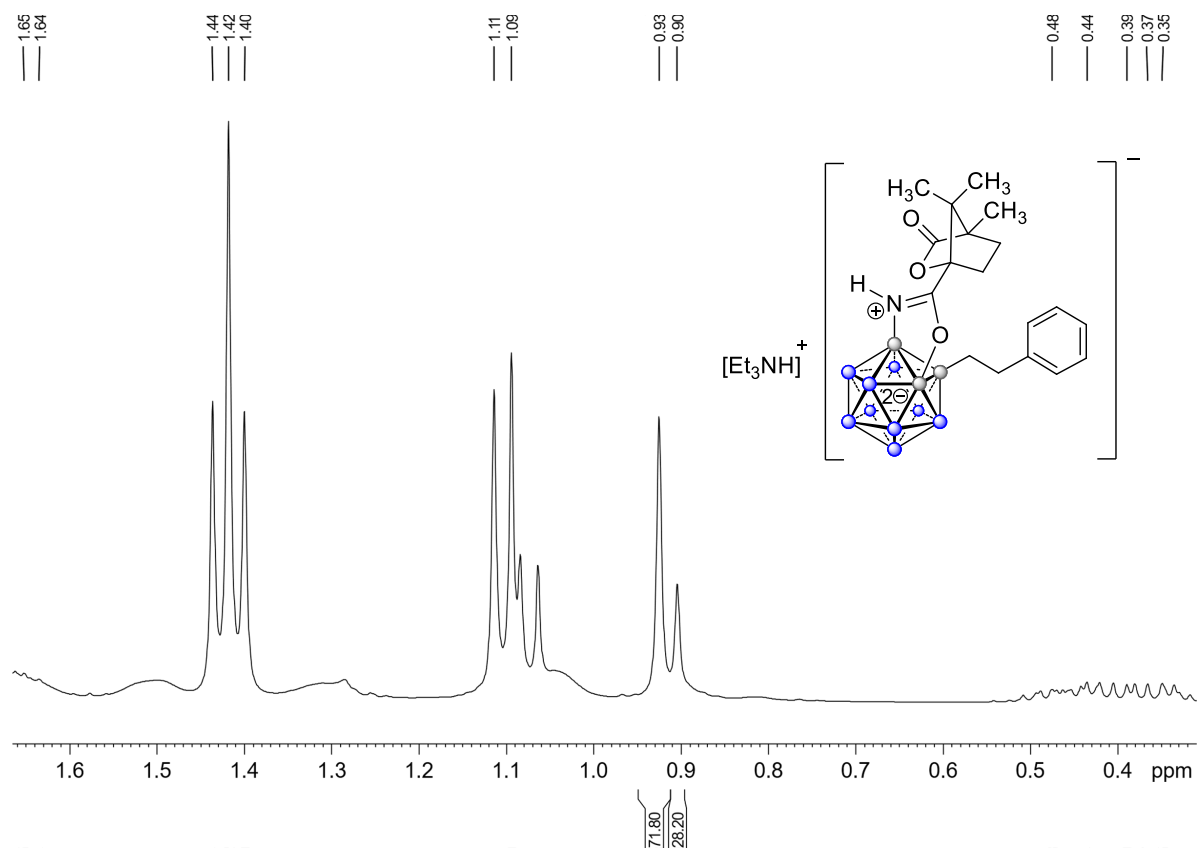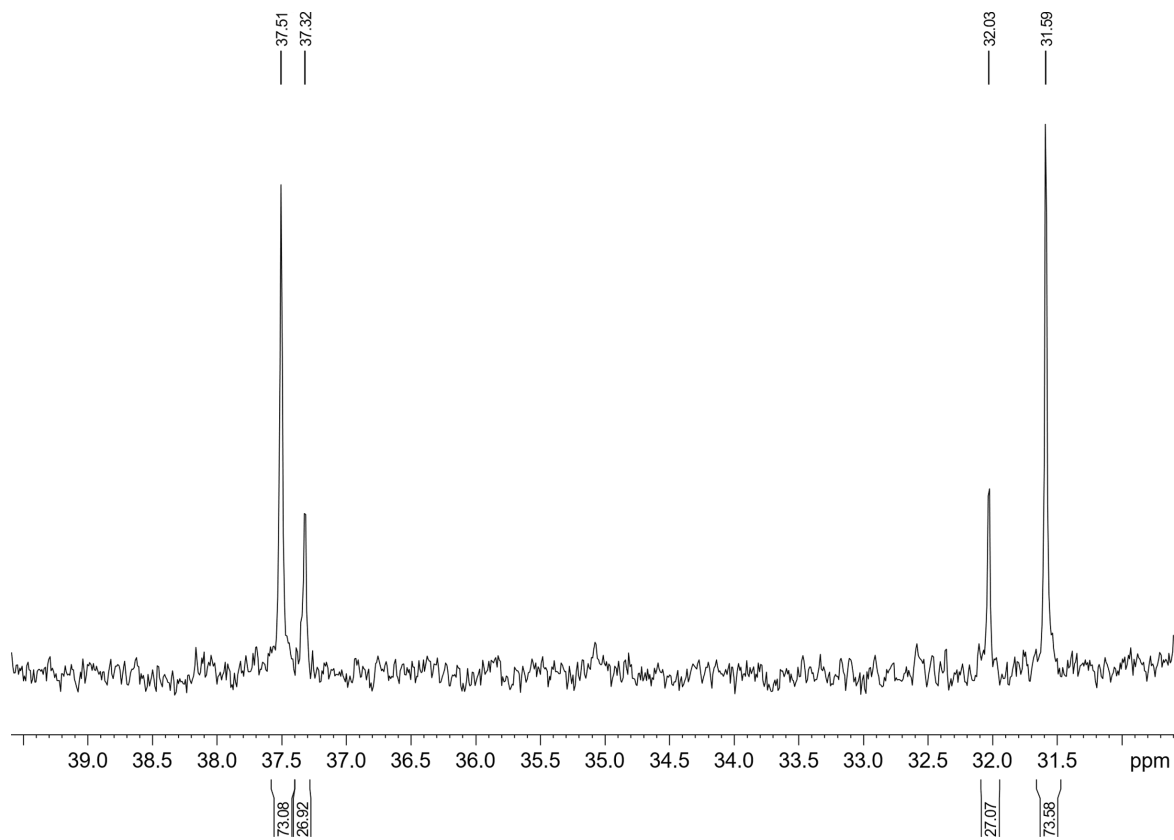

# Product 13b

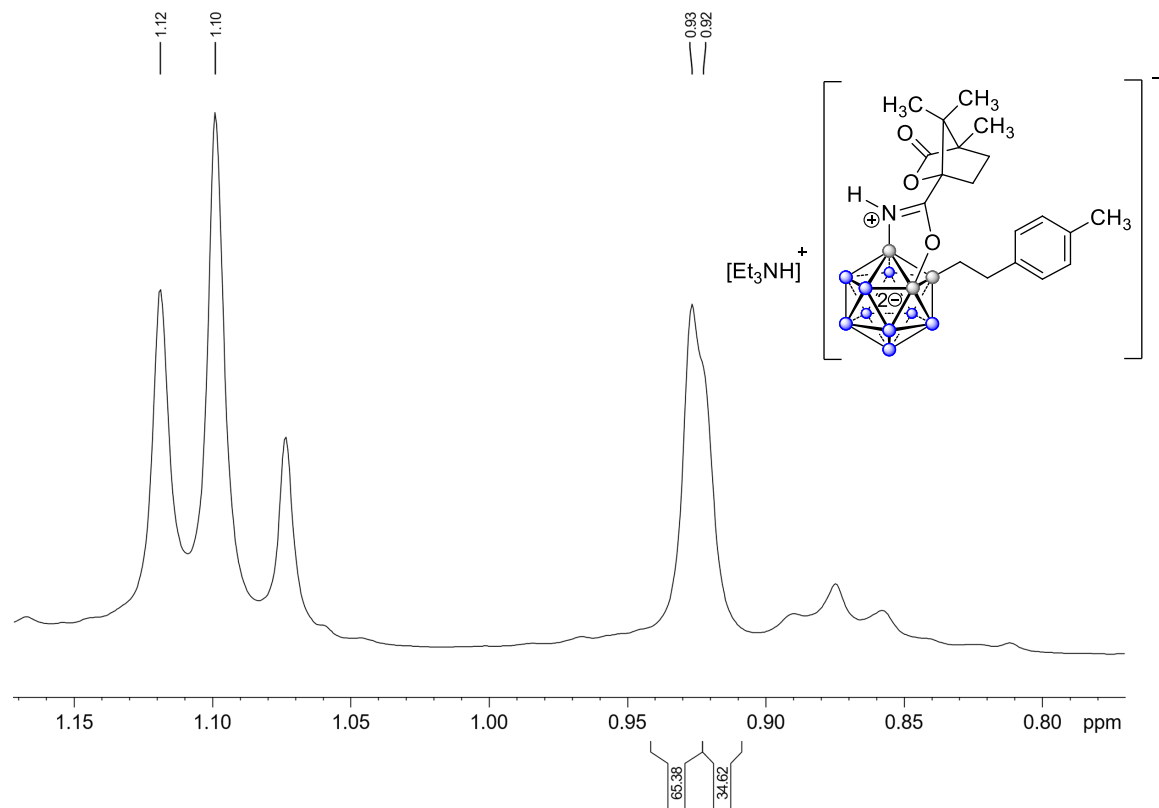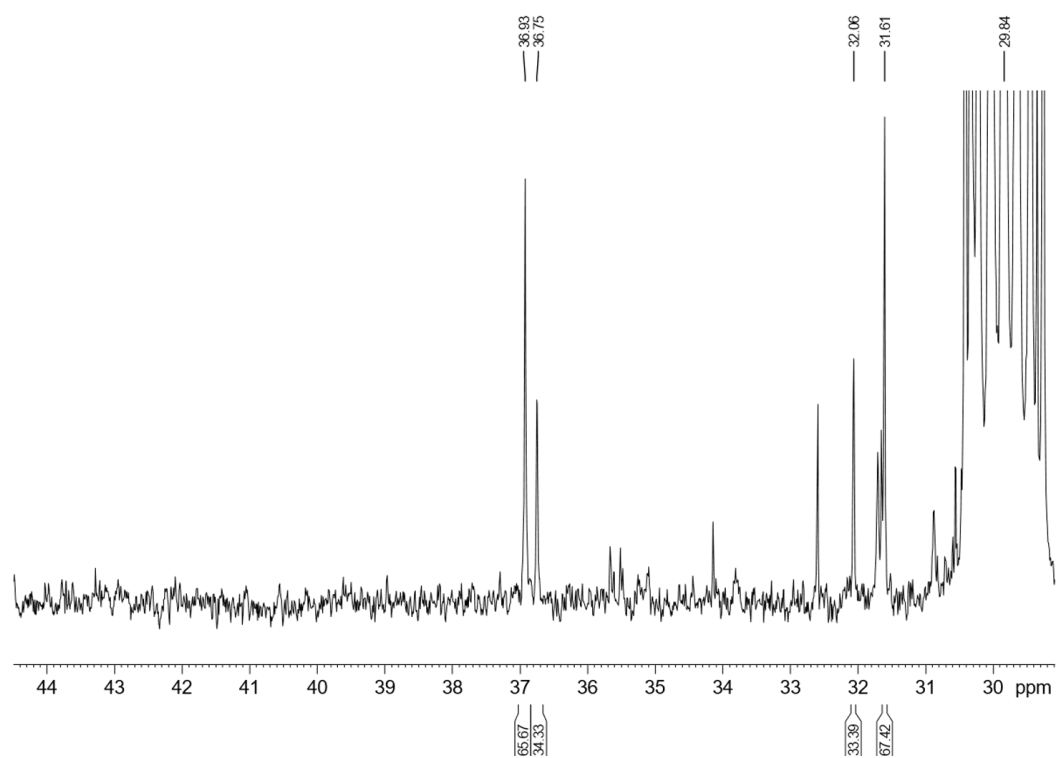

# Product 13c

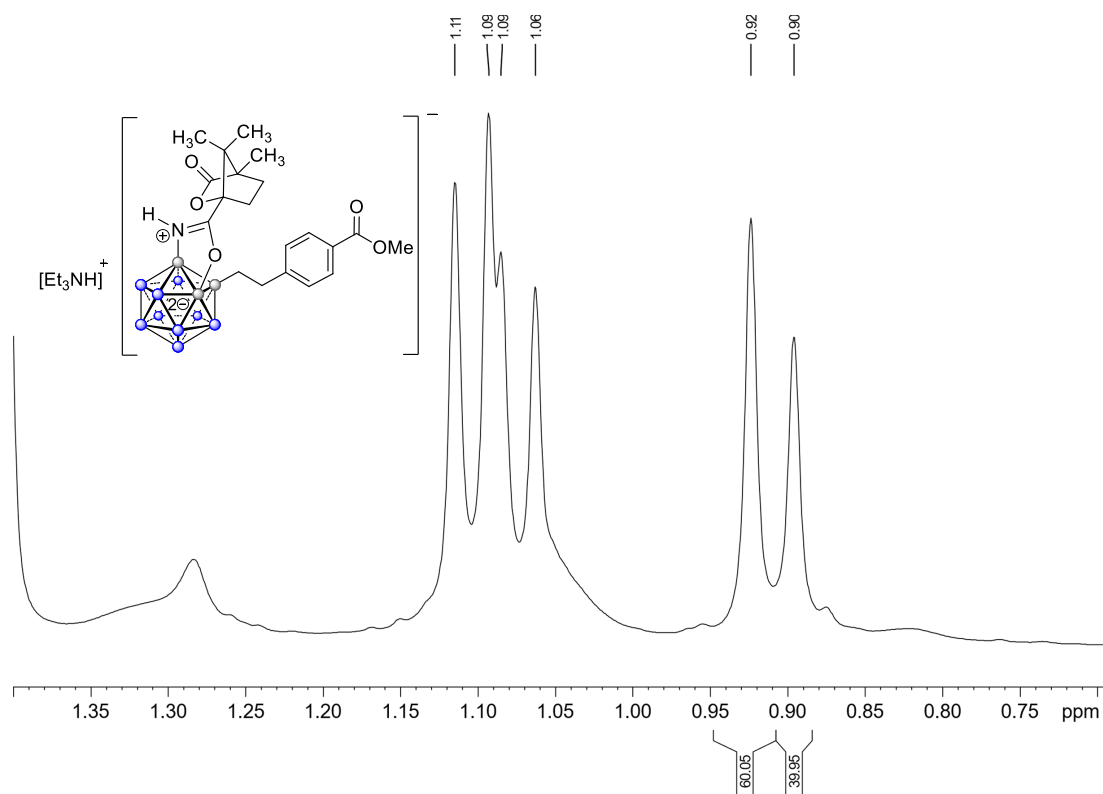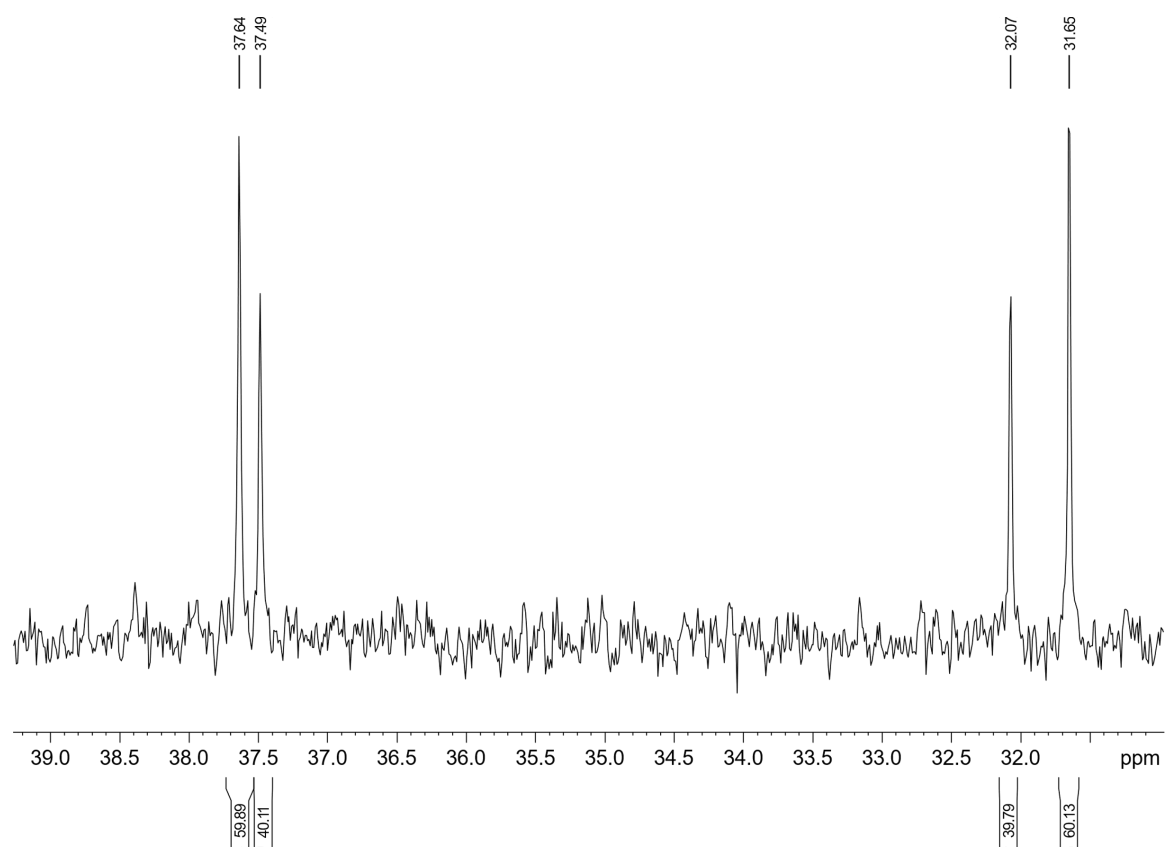

# Product 13d

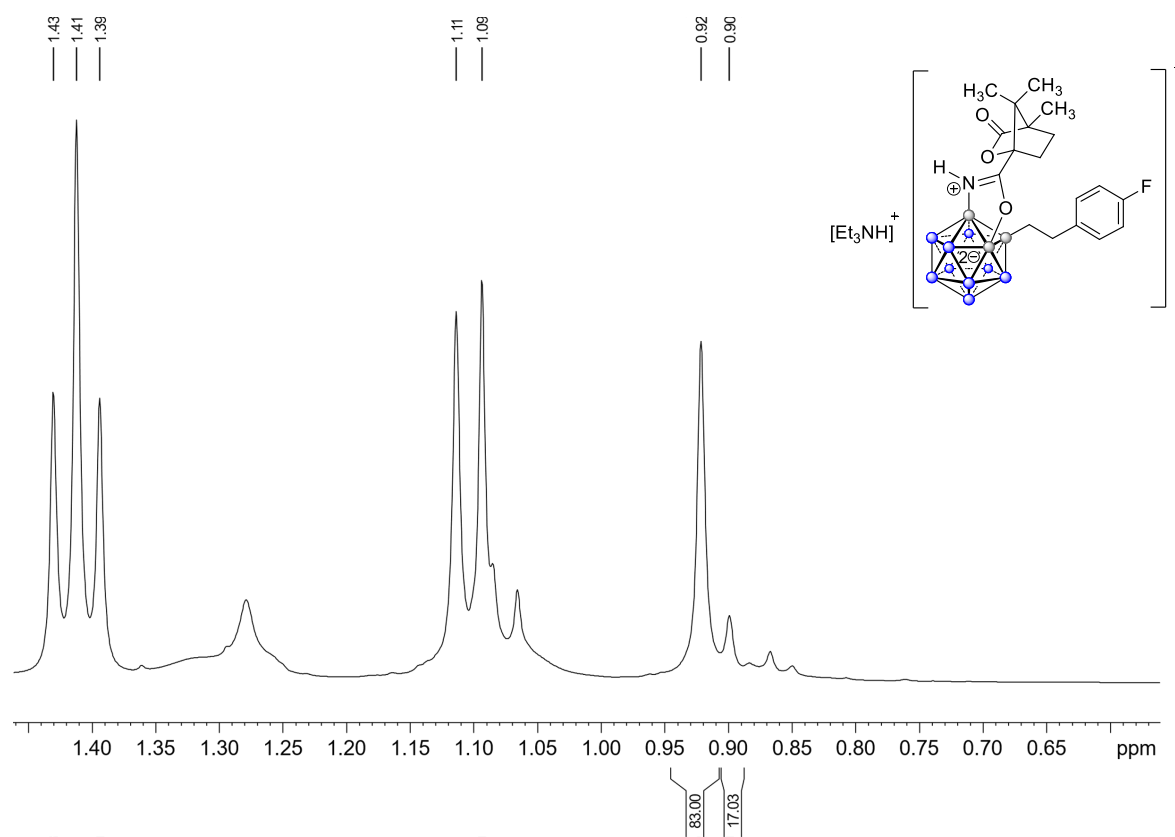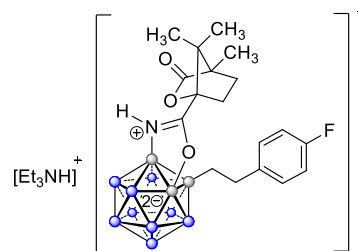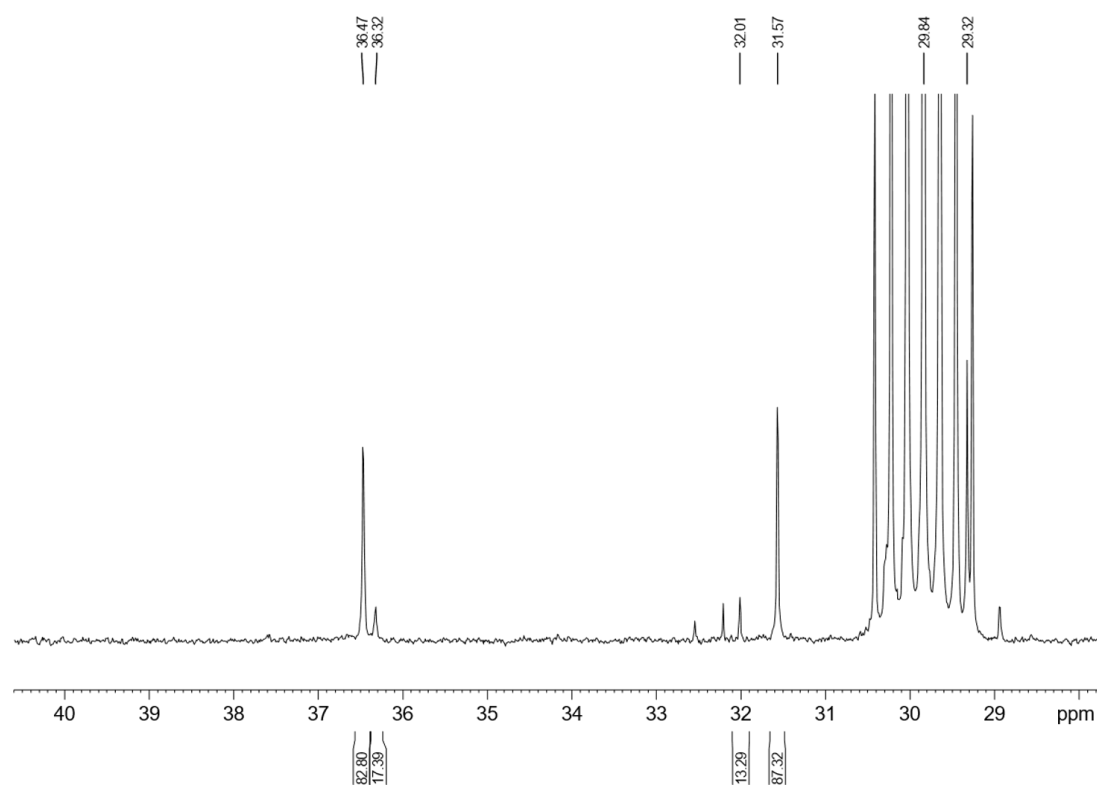

Product 13e

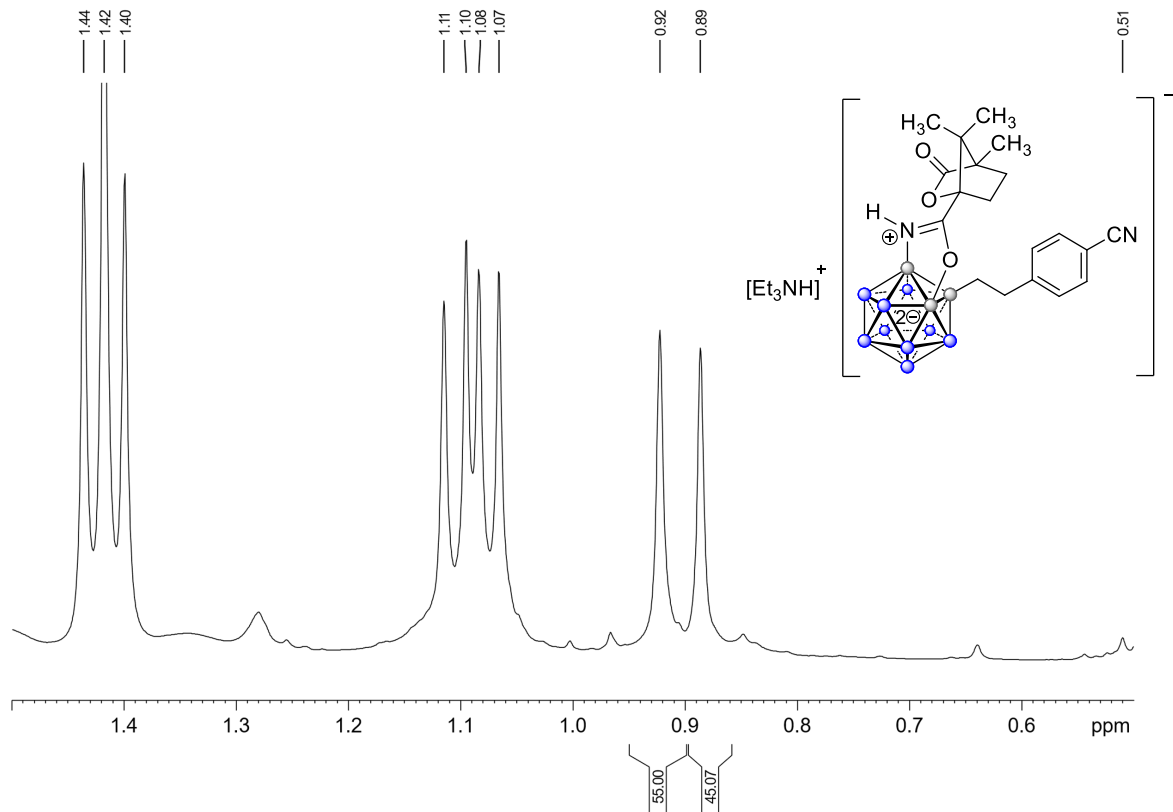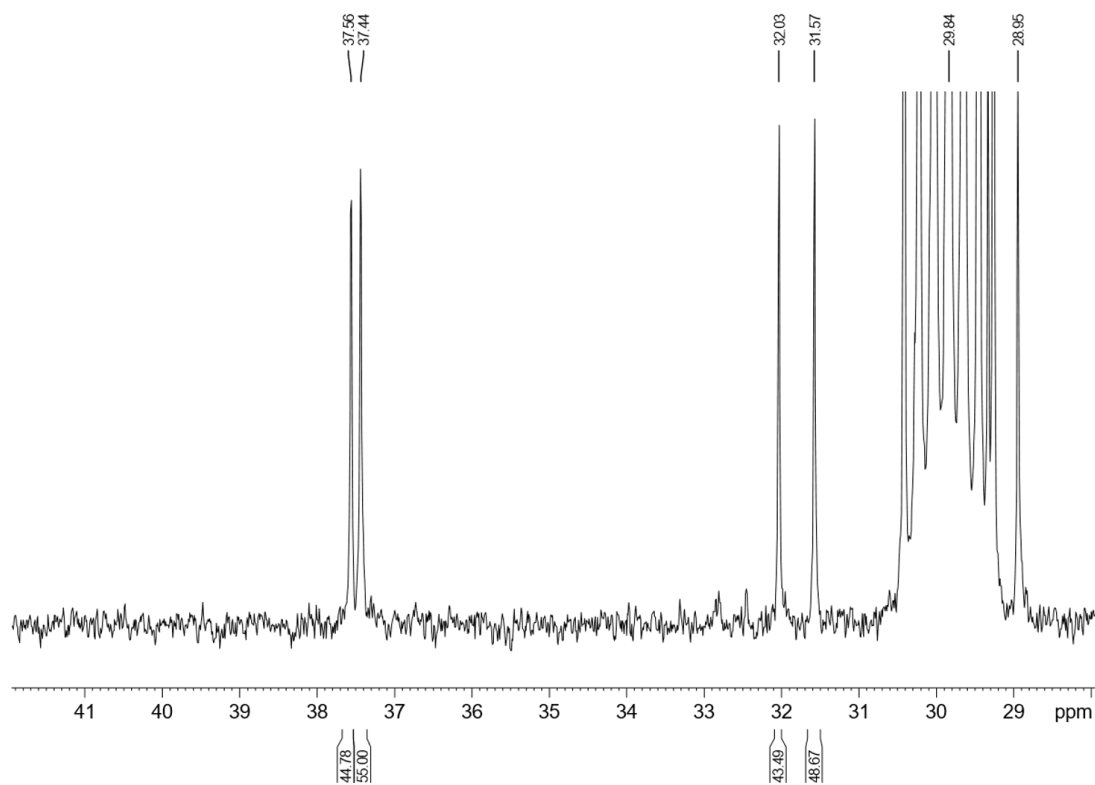

Product 13f

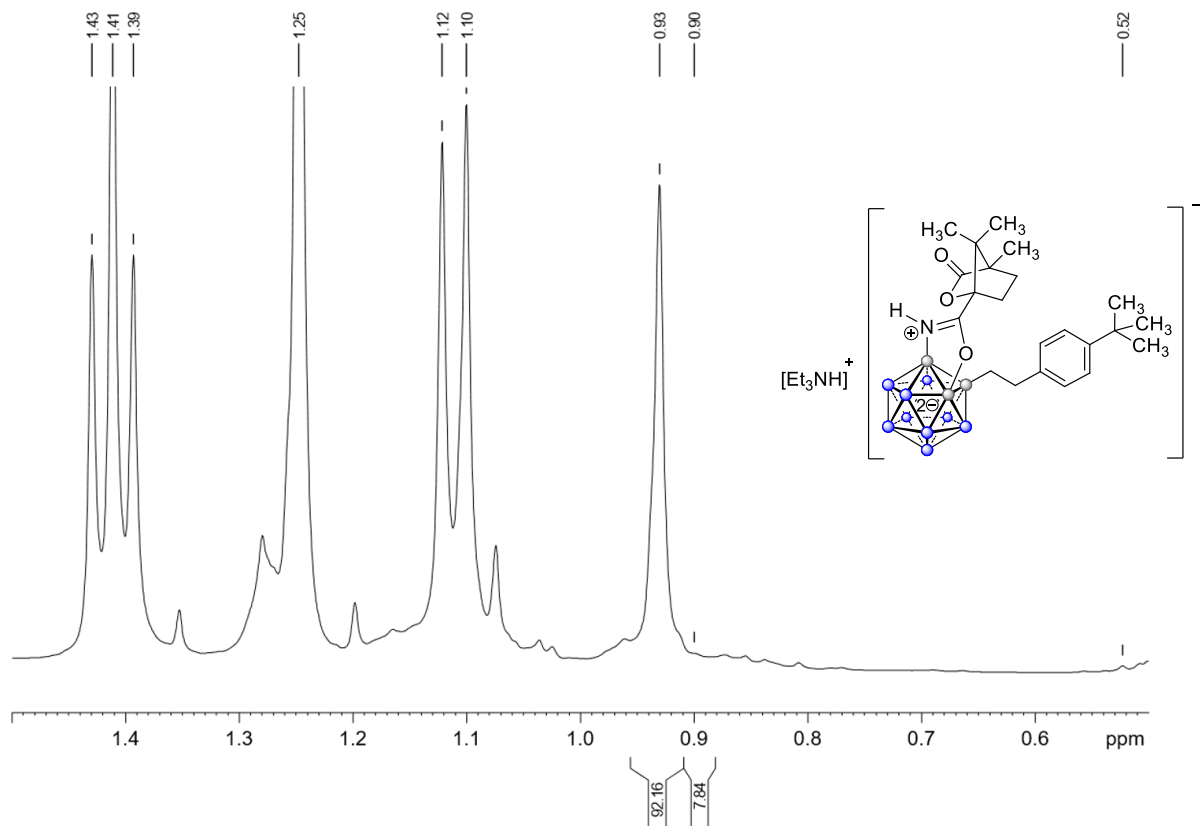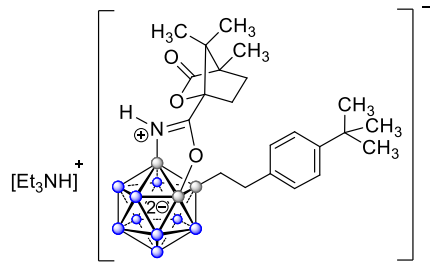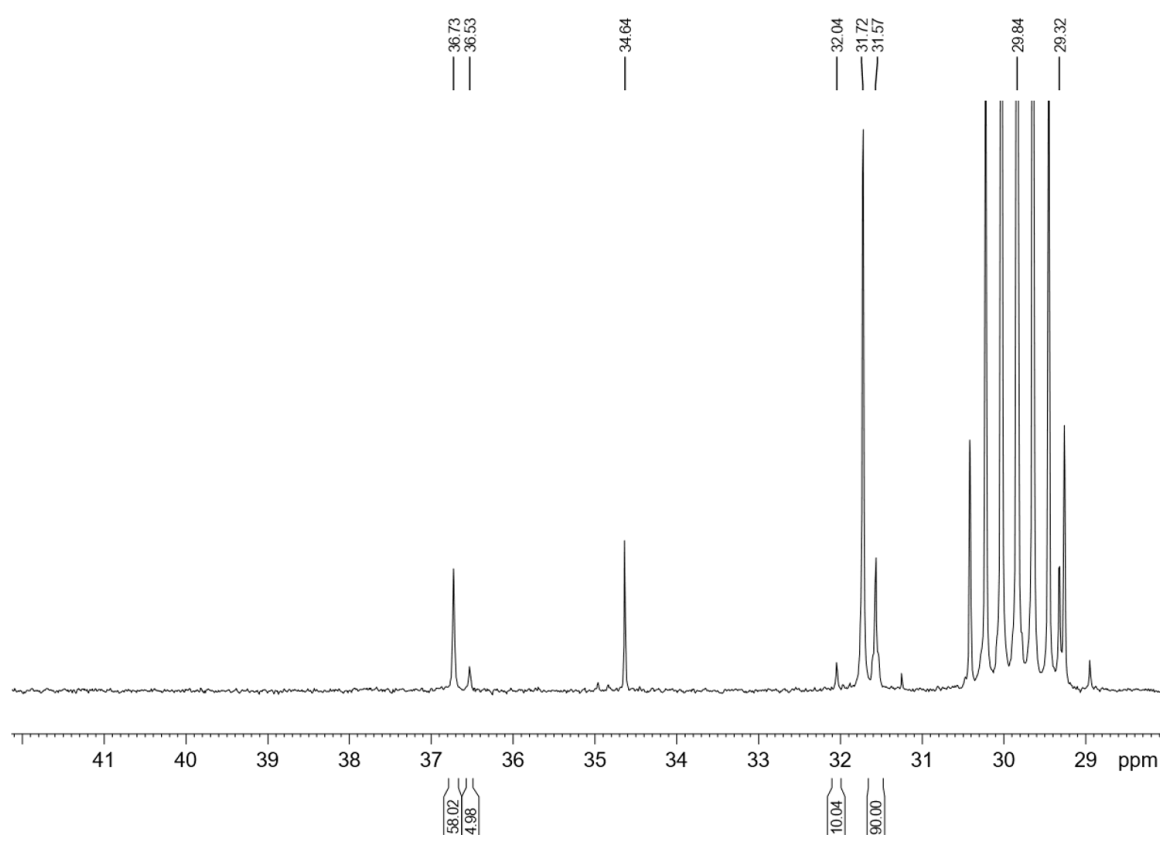

# Product 13g

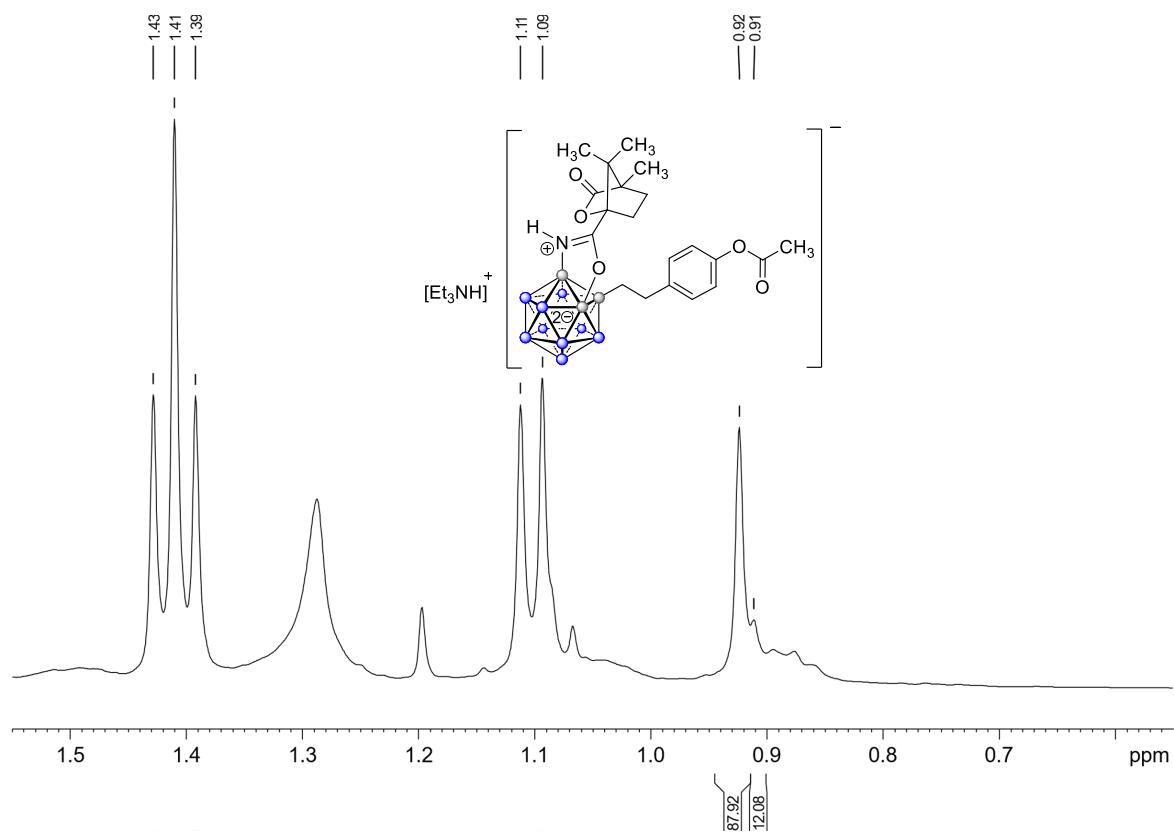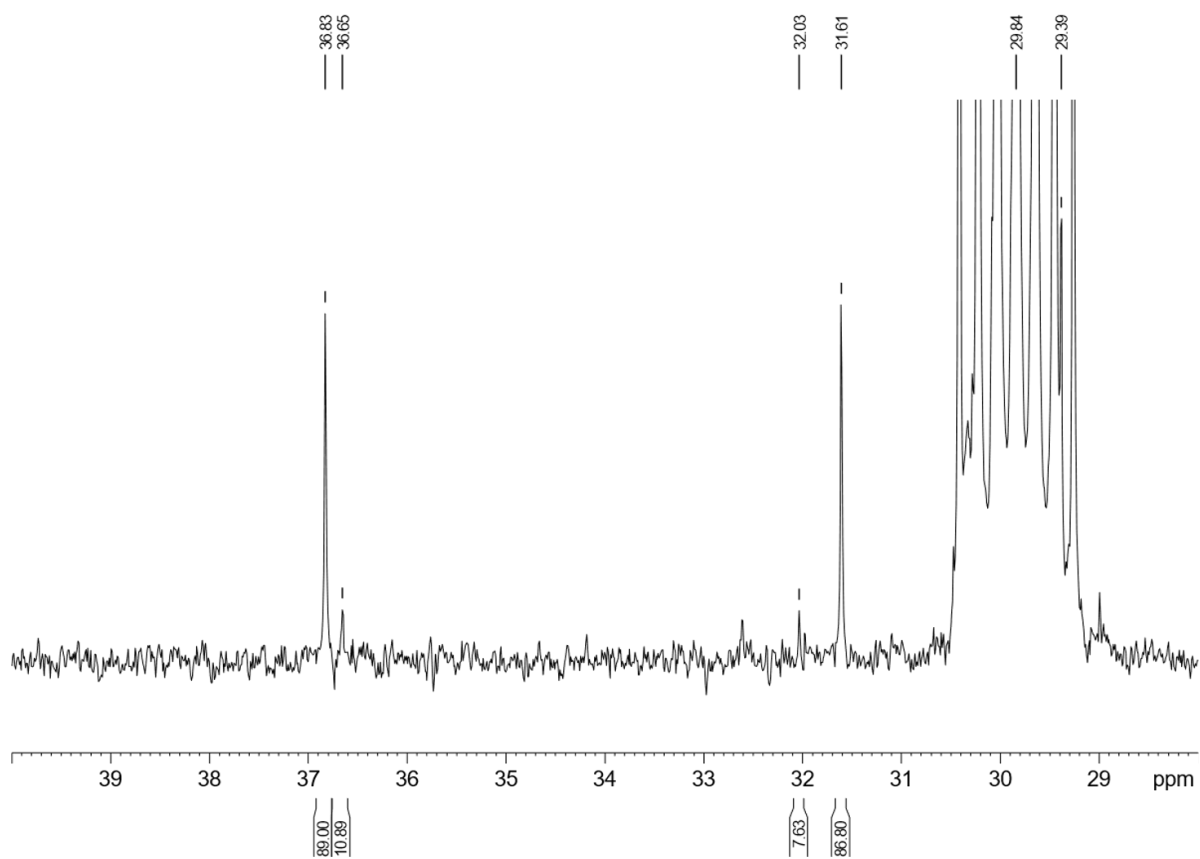

Product 13h

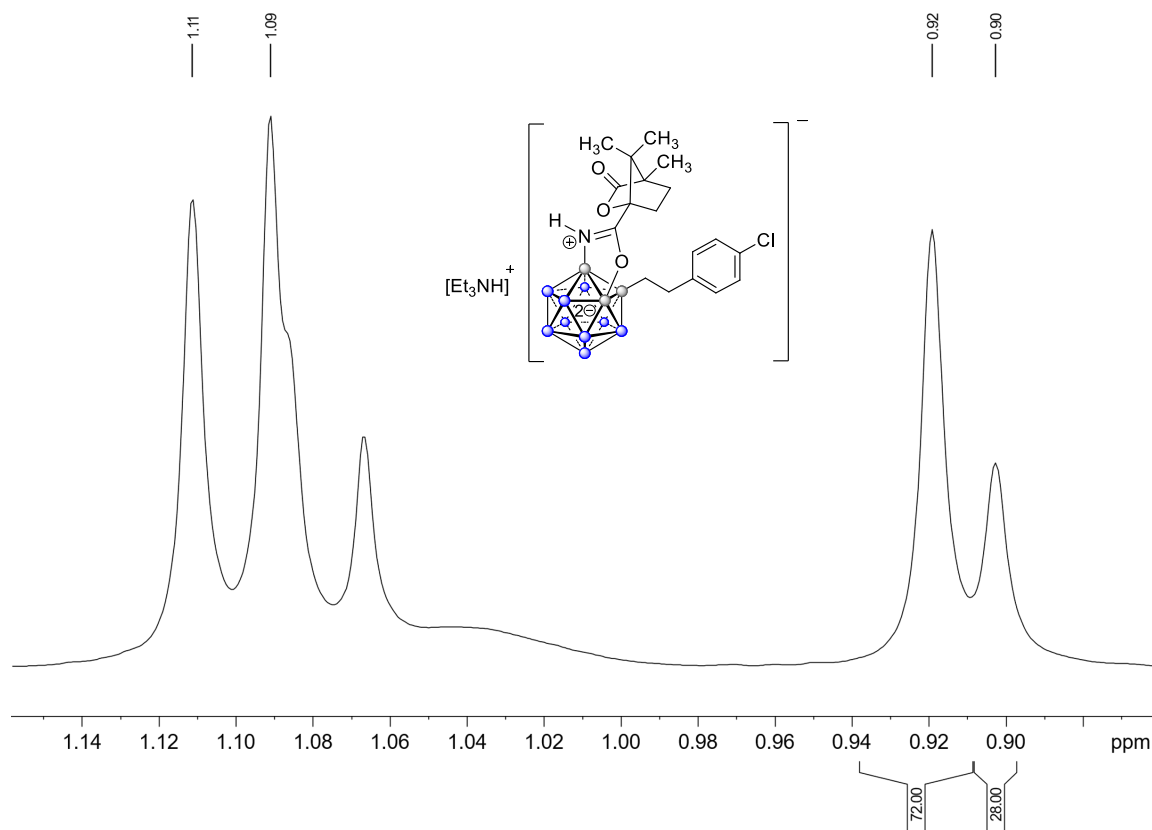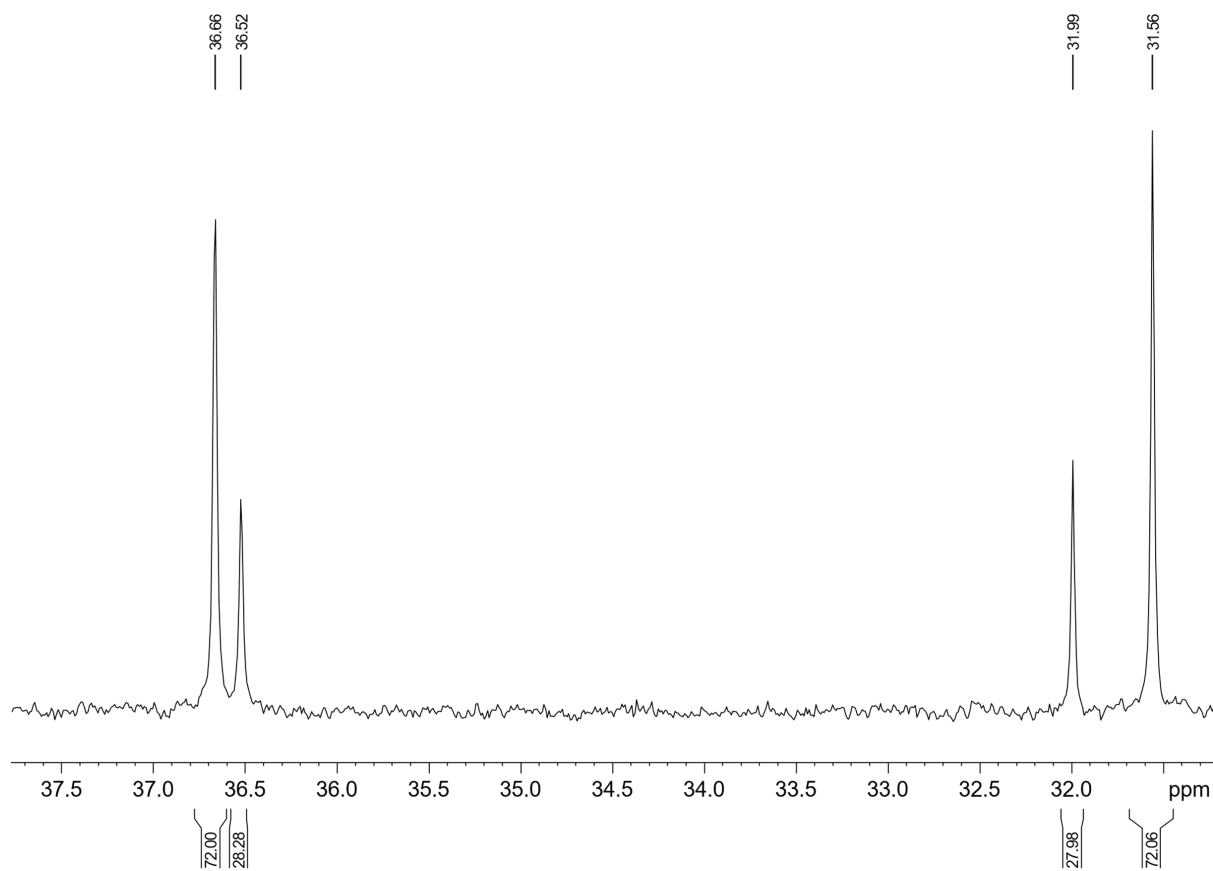



# Product 13i

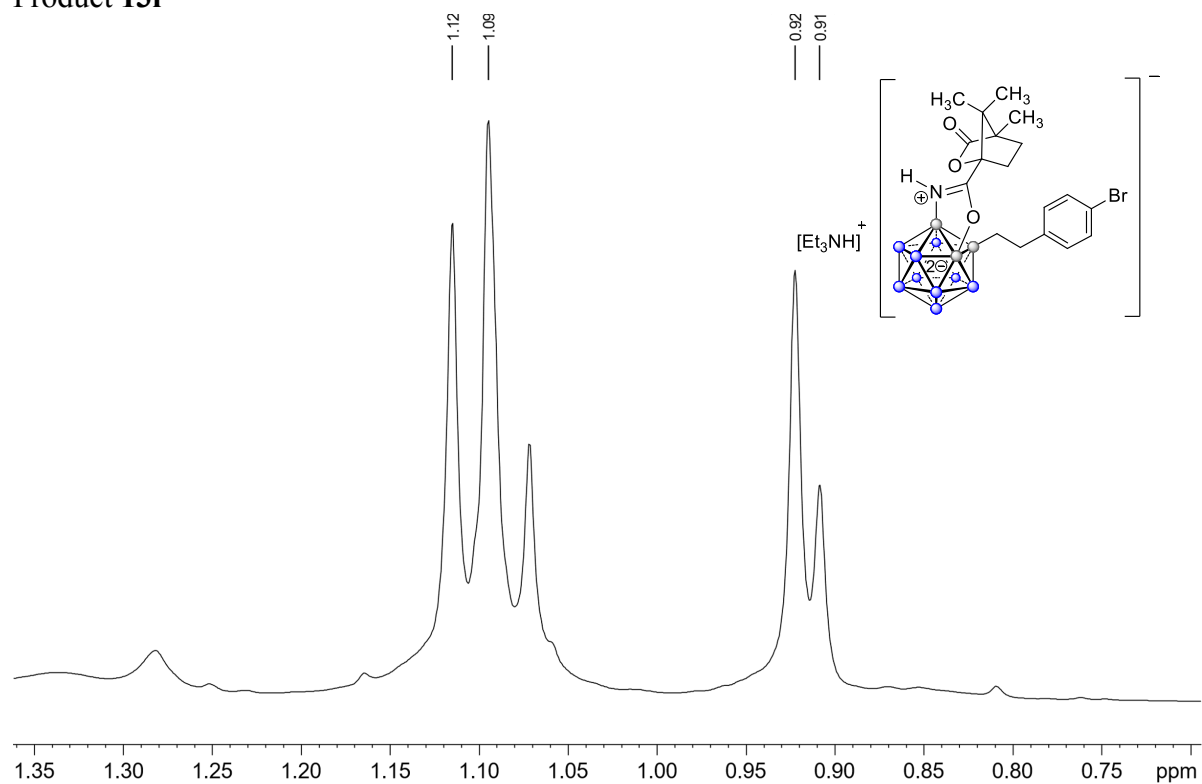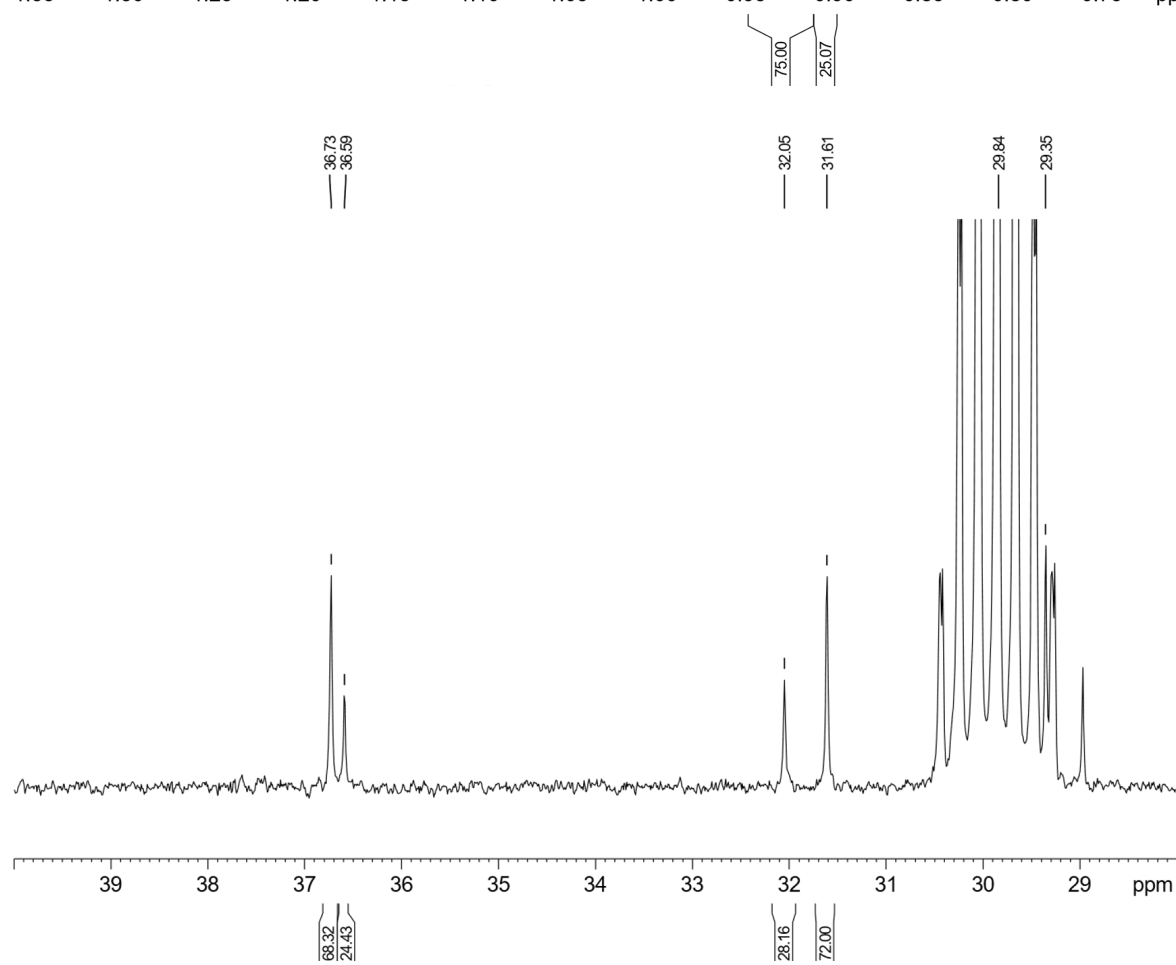

# Product 13j

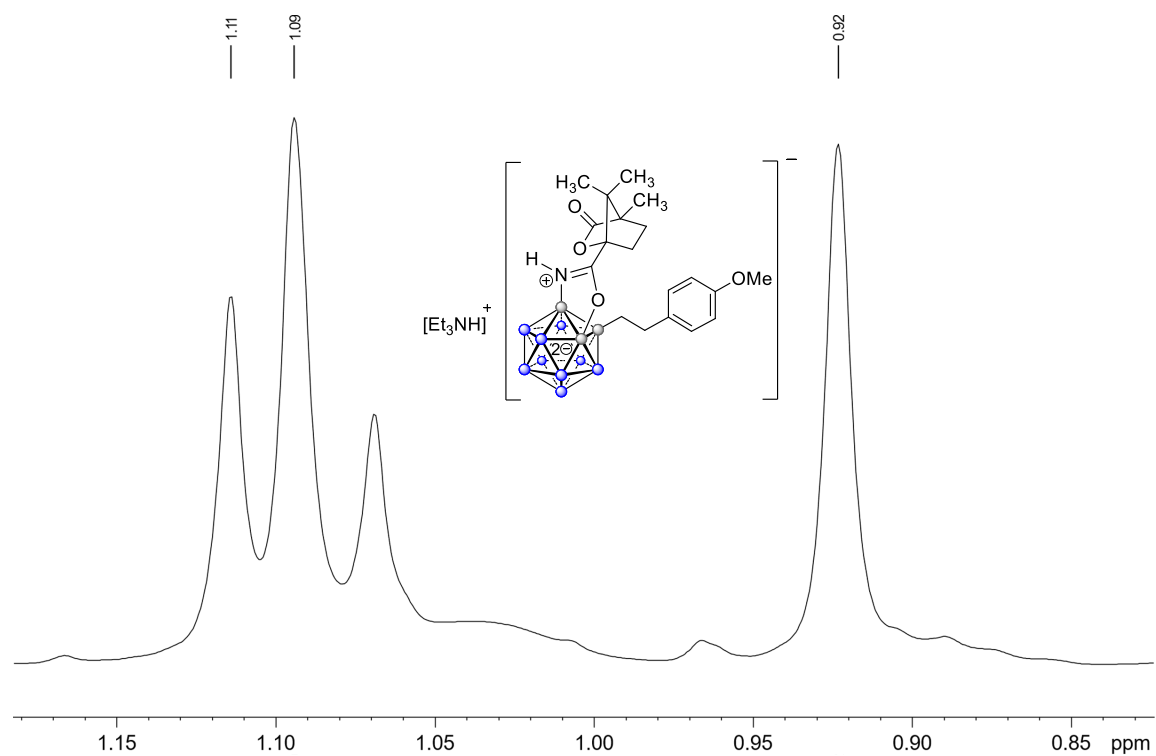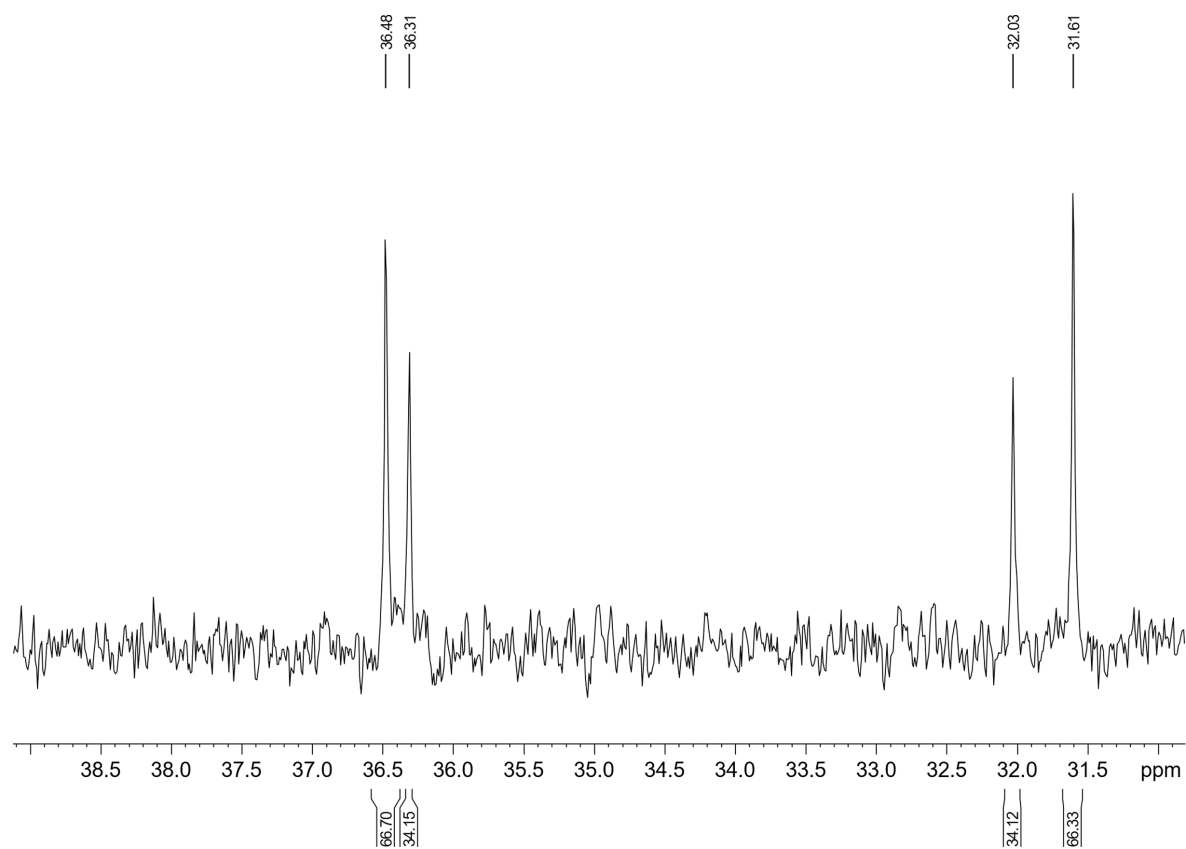

# Product 13k

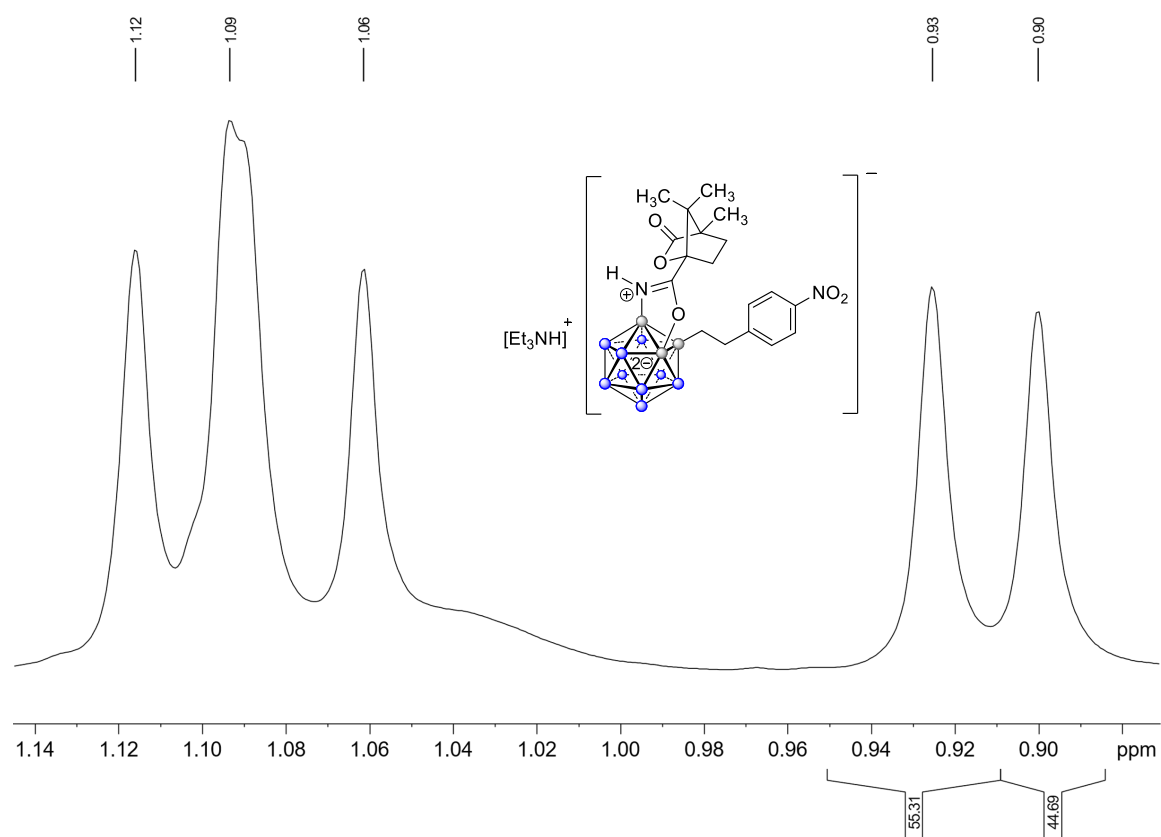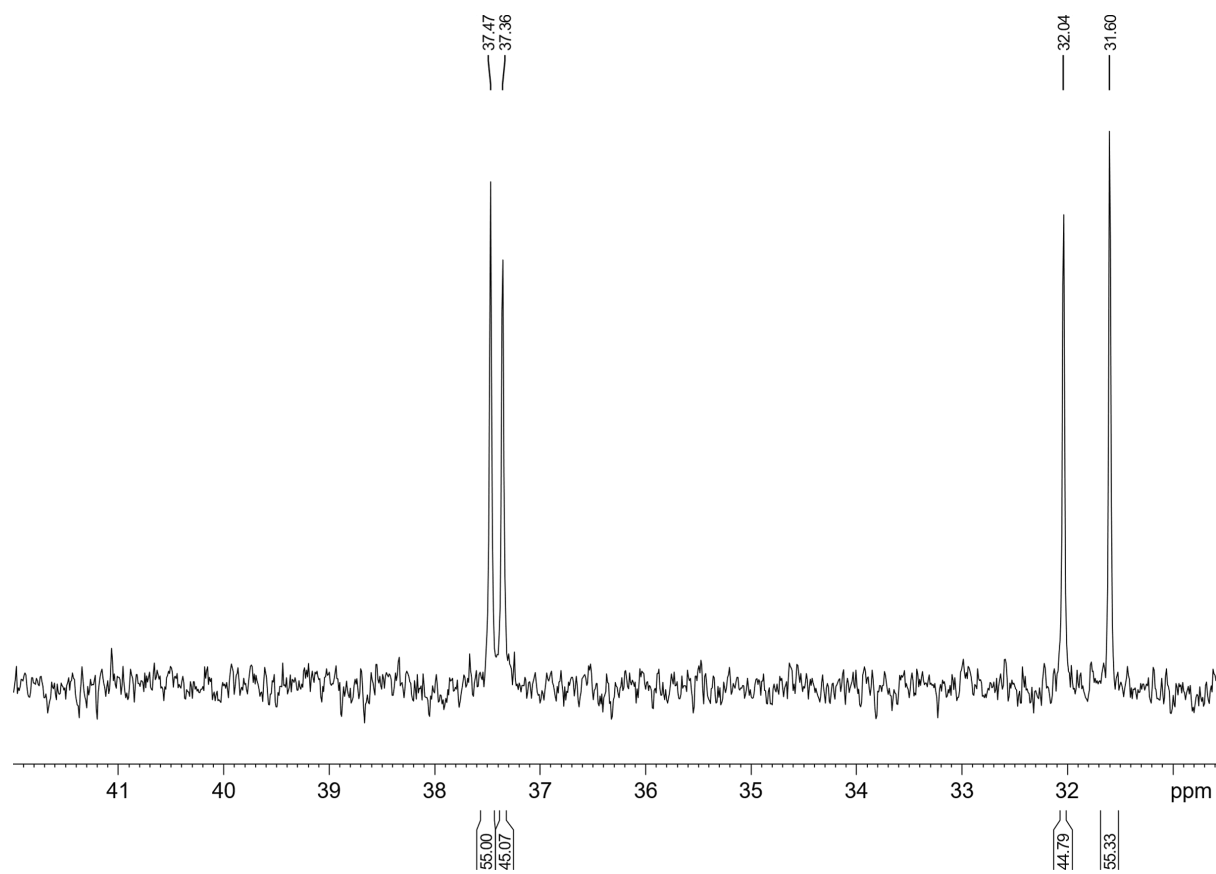

Product 14a

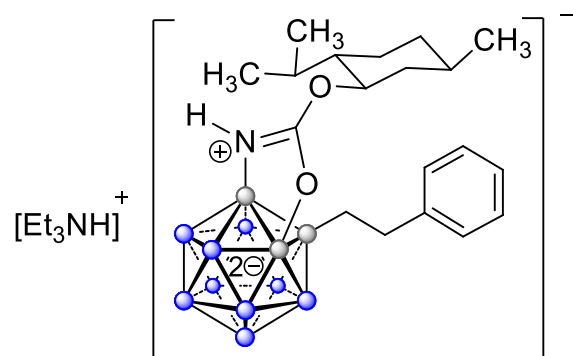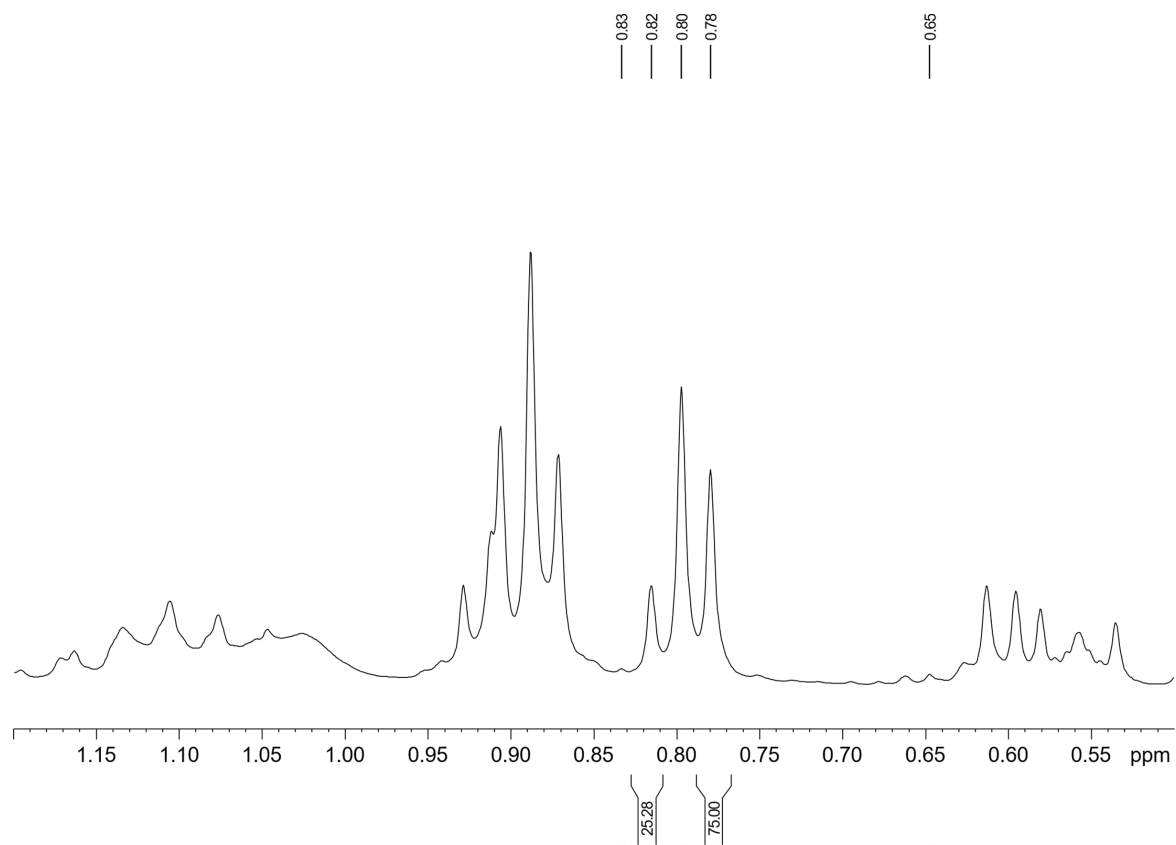

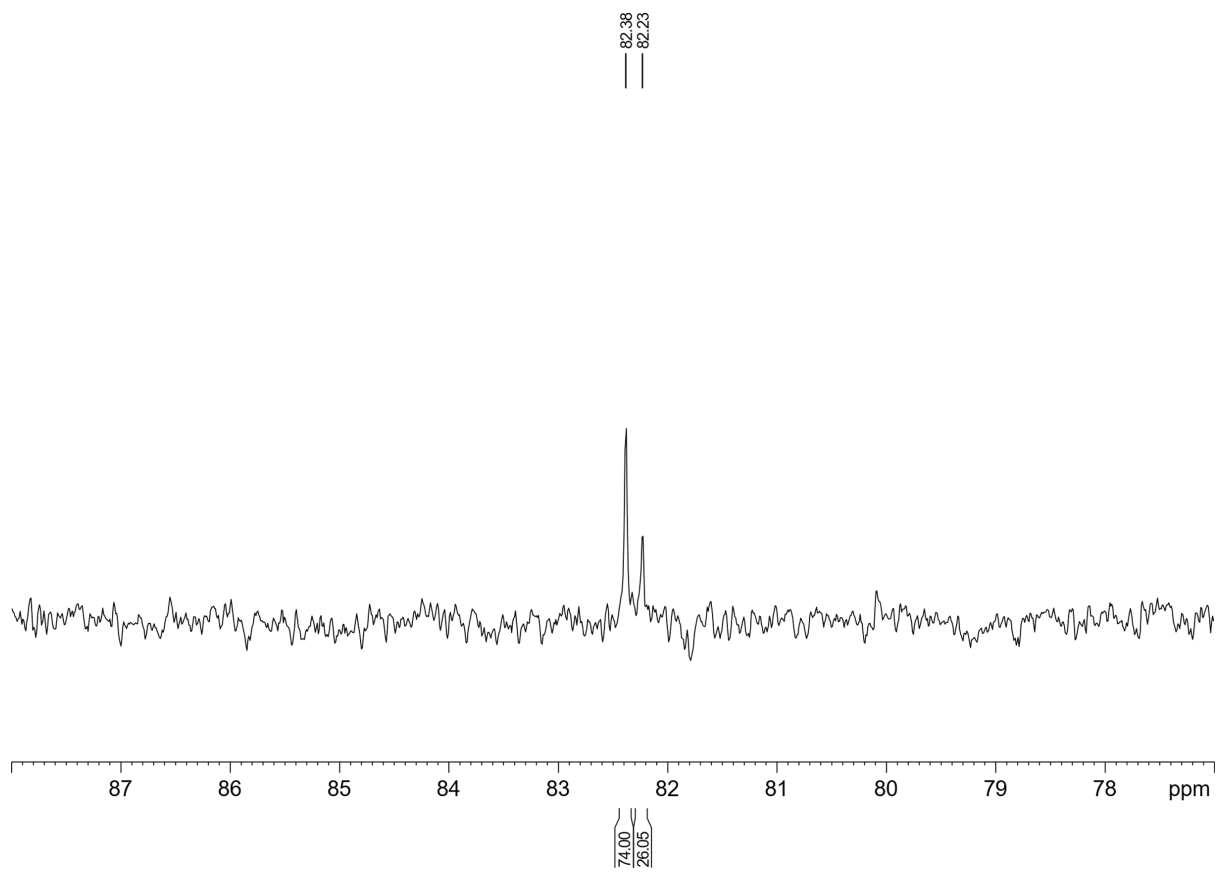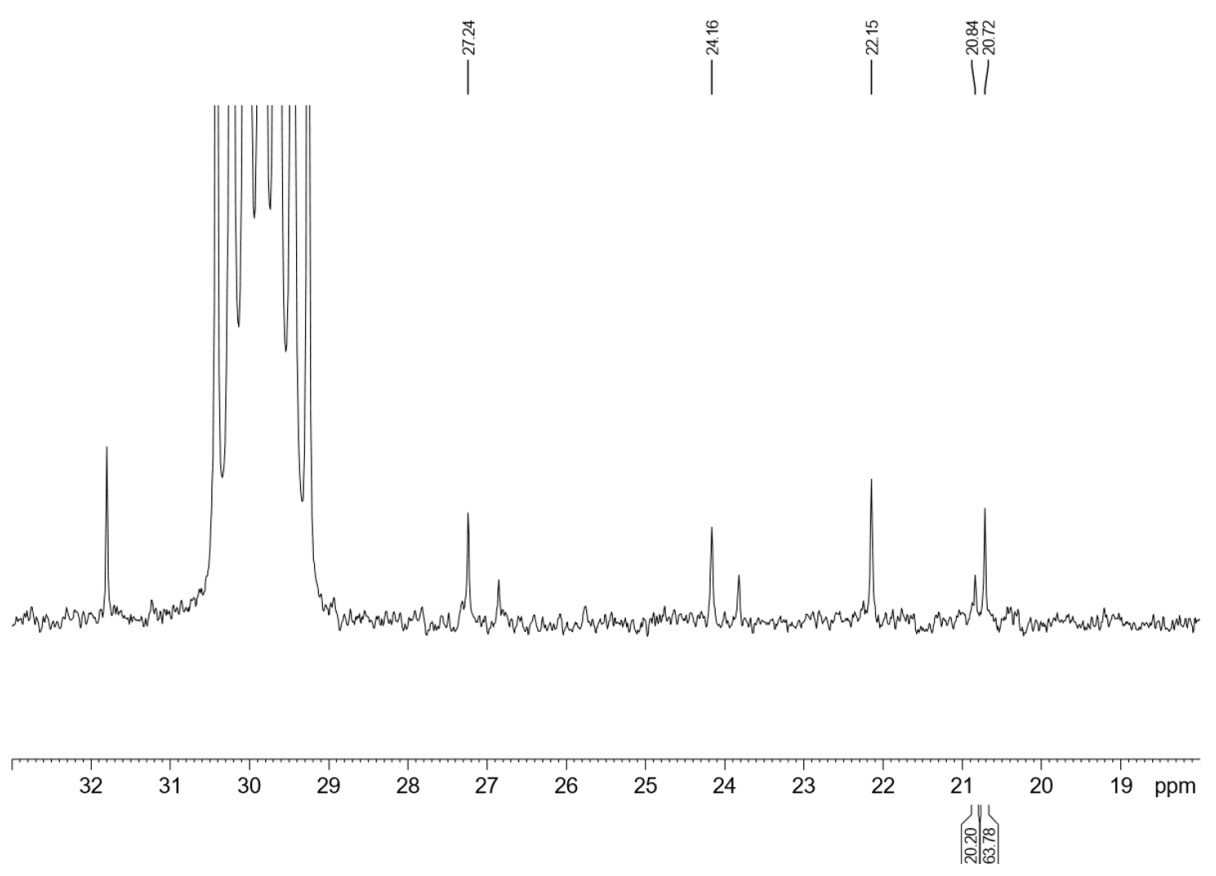

DR-014

Product 14b

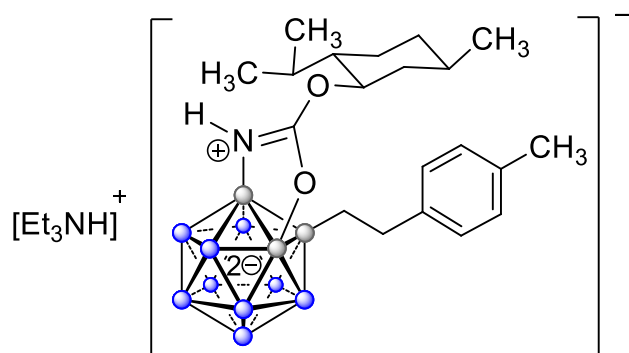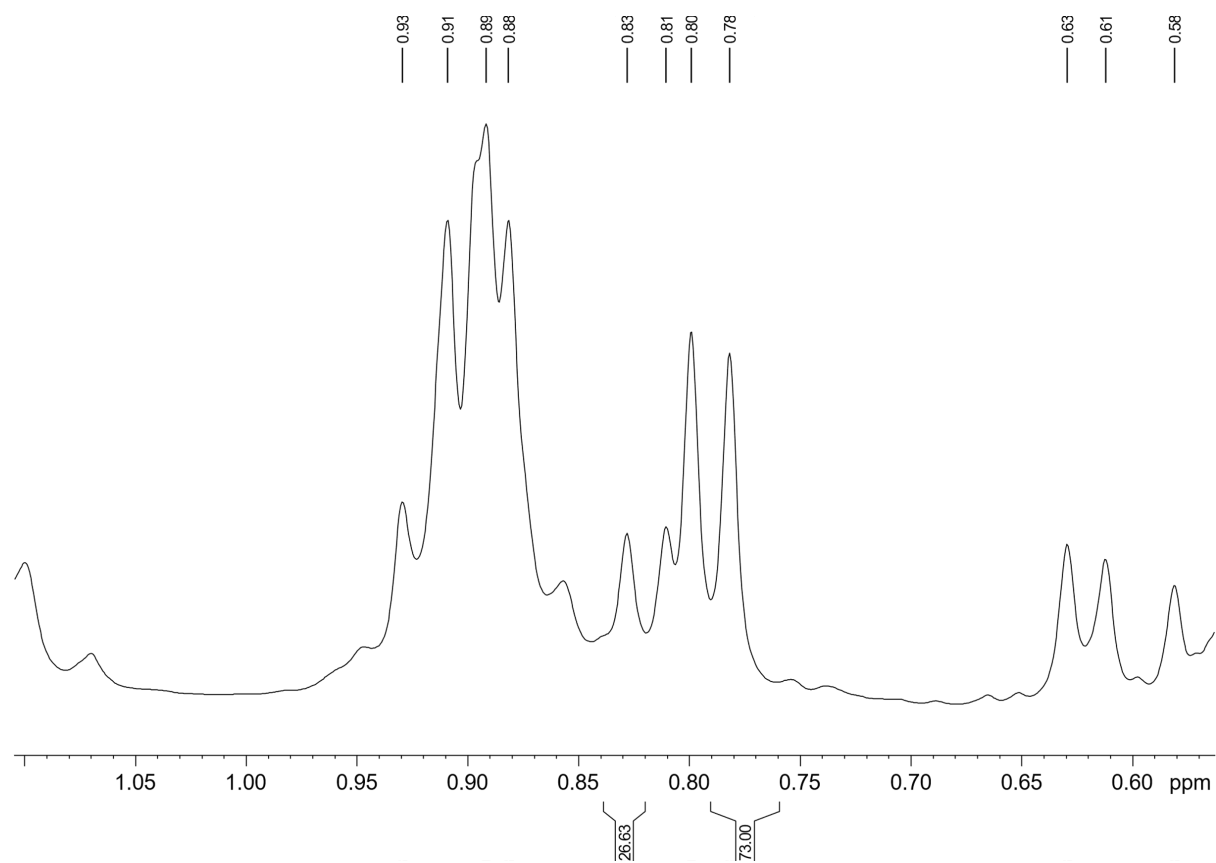

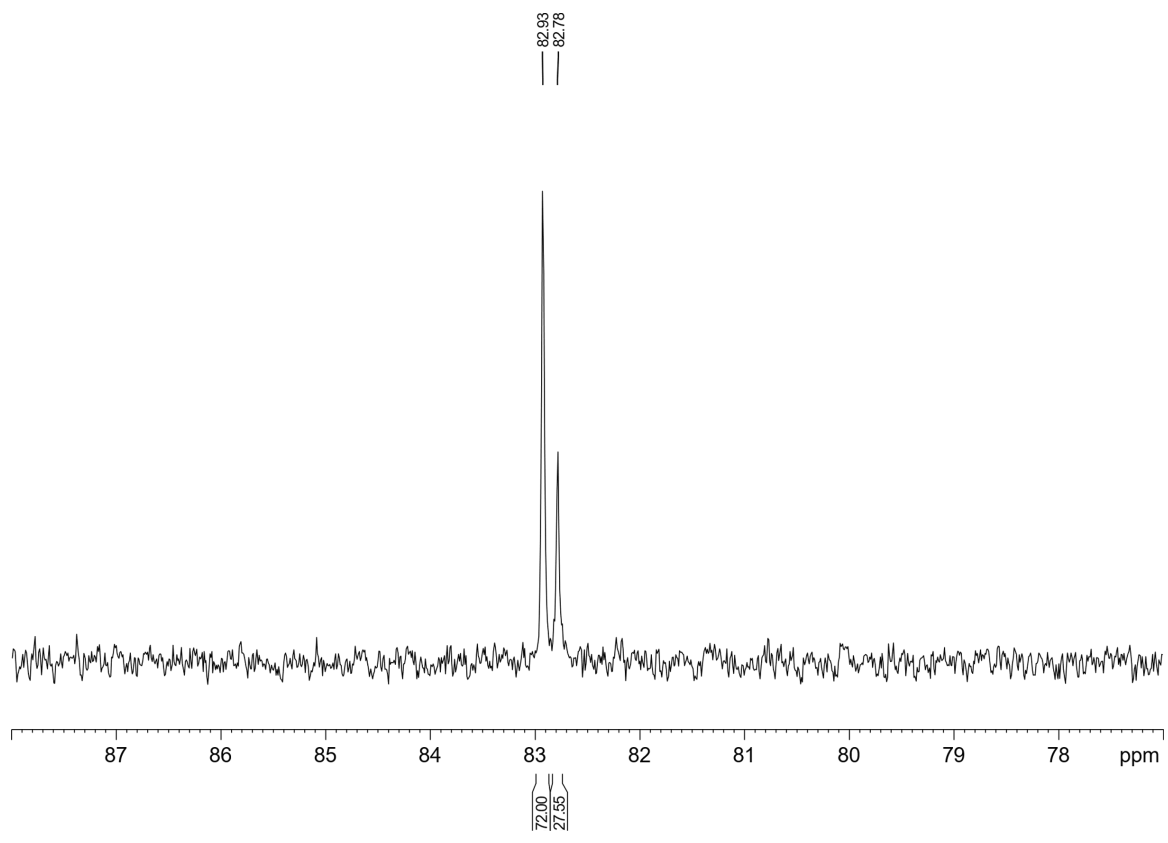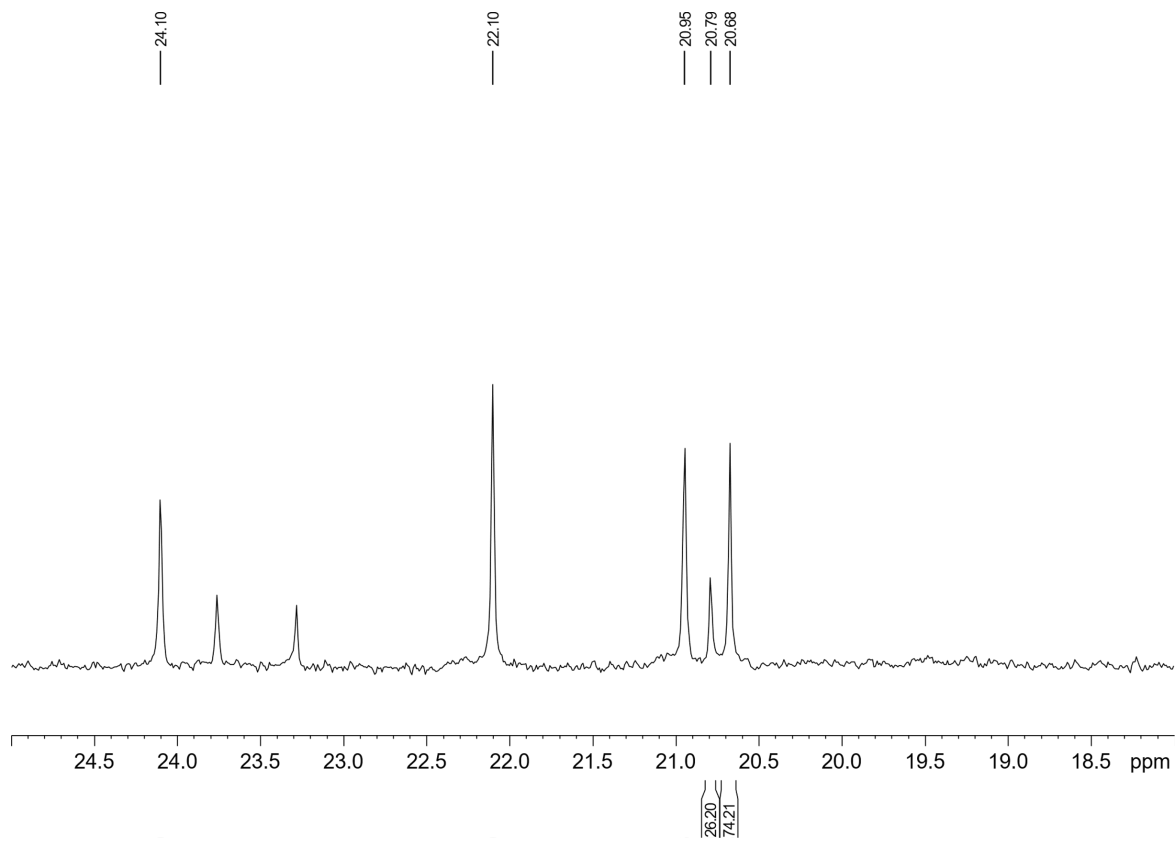

Product 14c

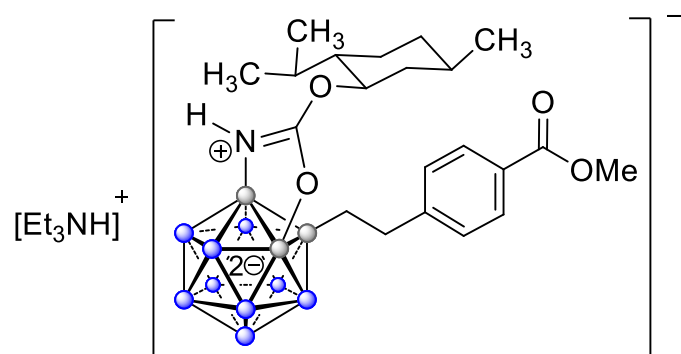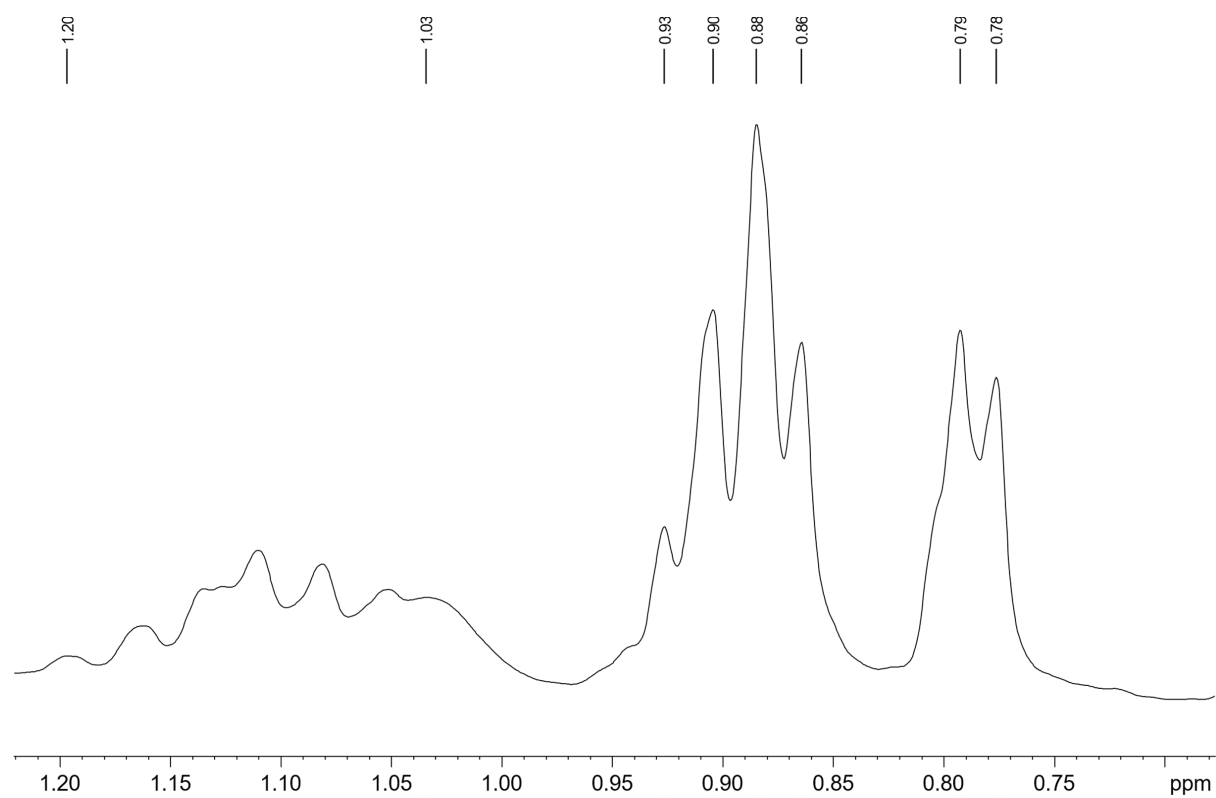



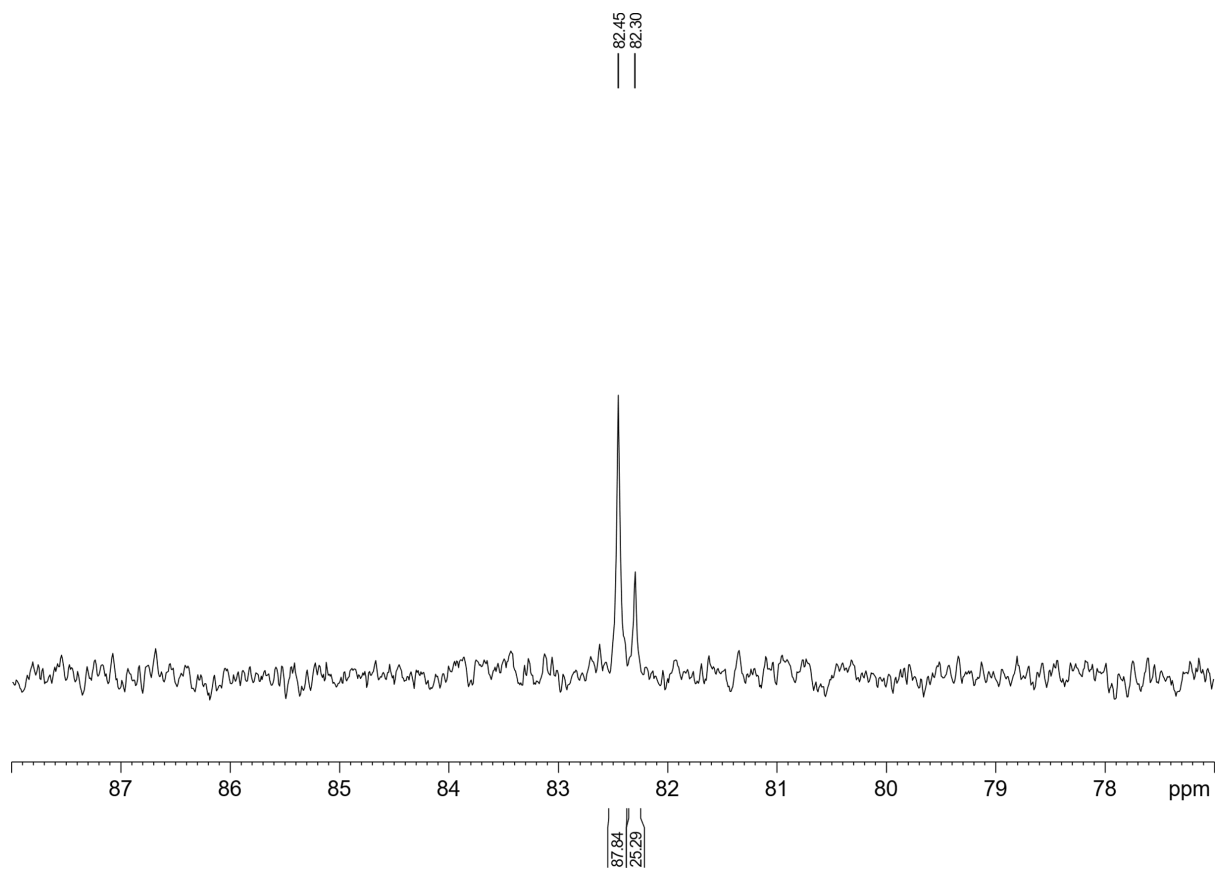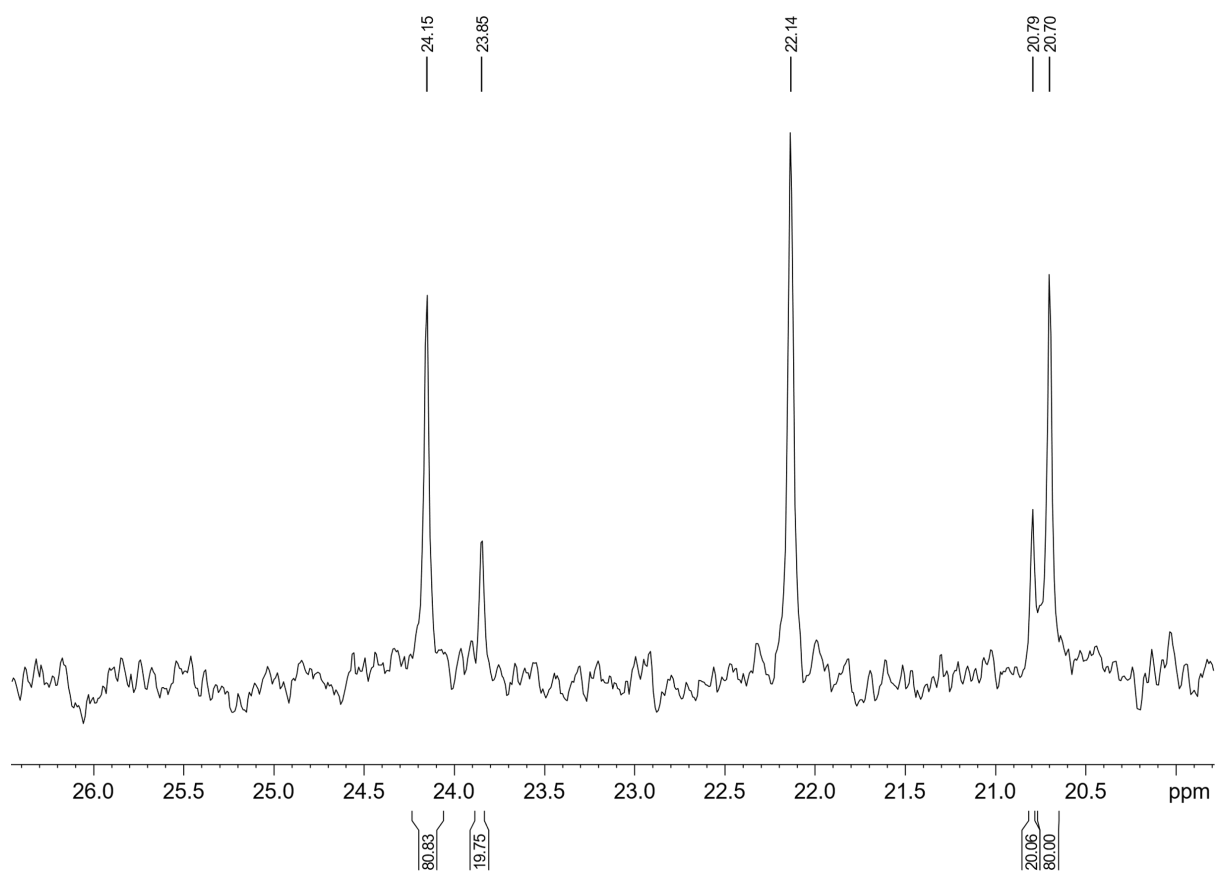

DR-018

Product **14d**

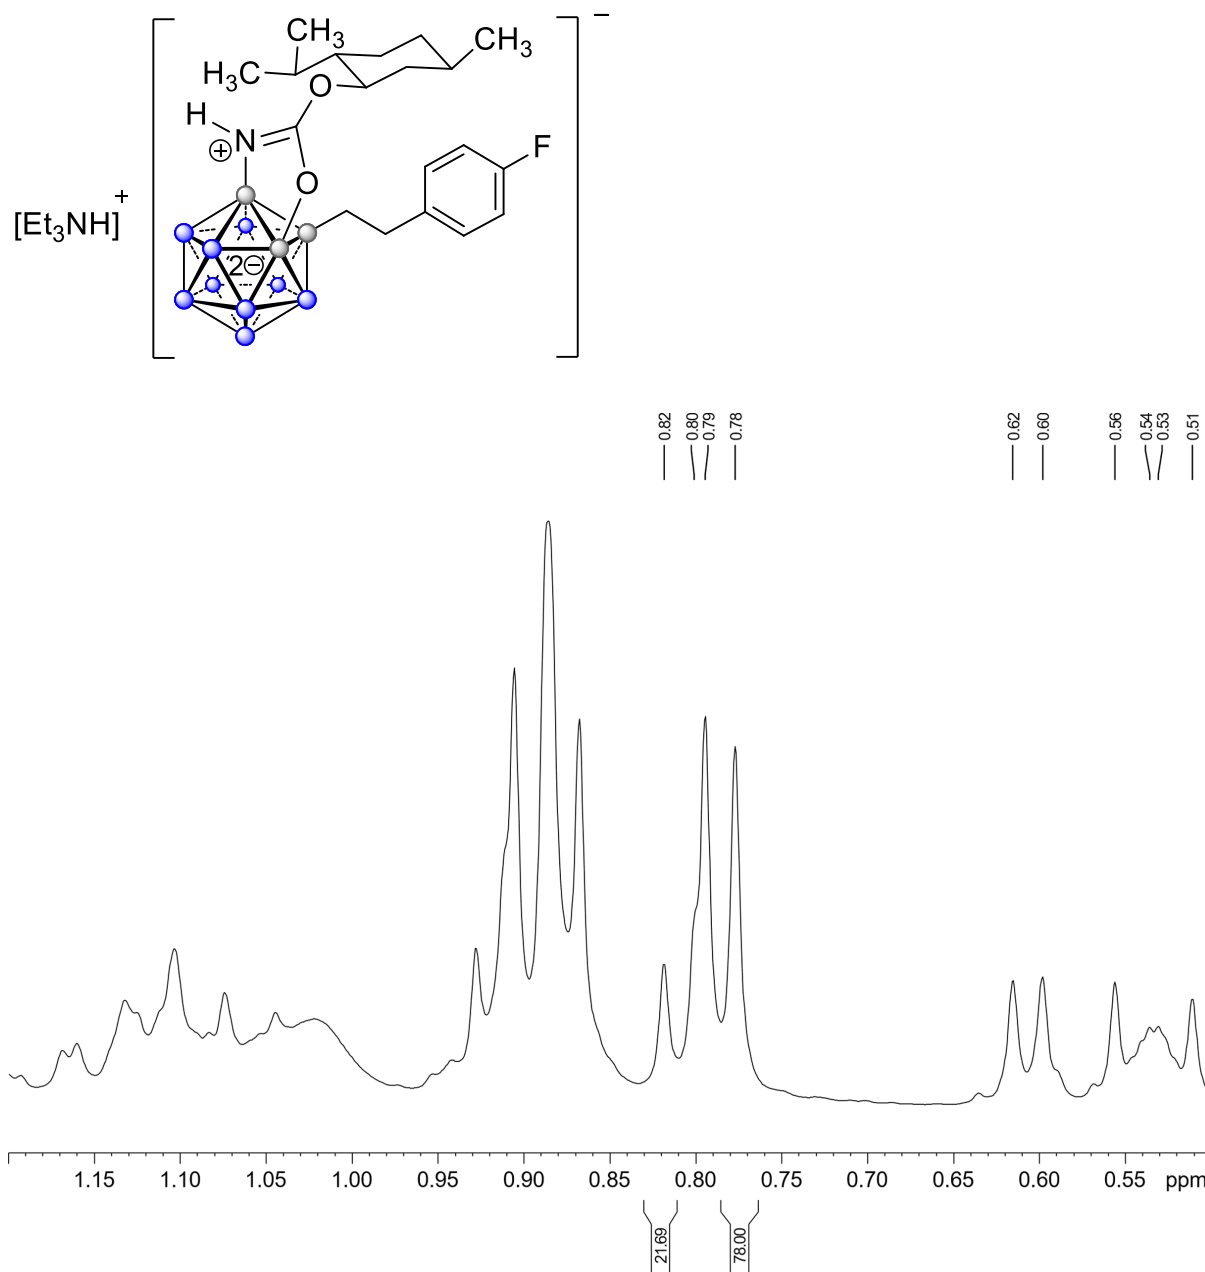

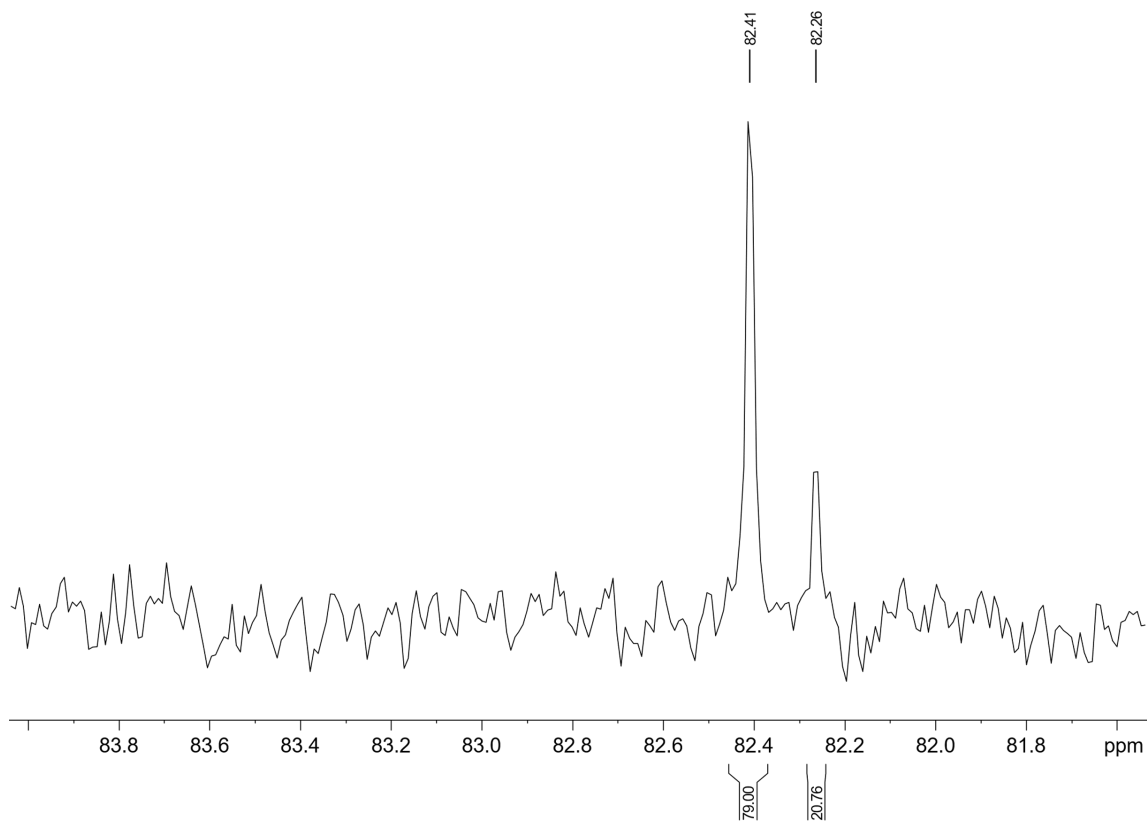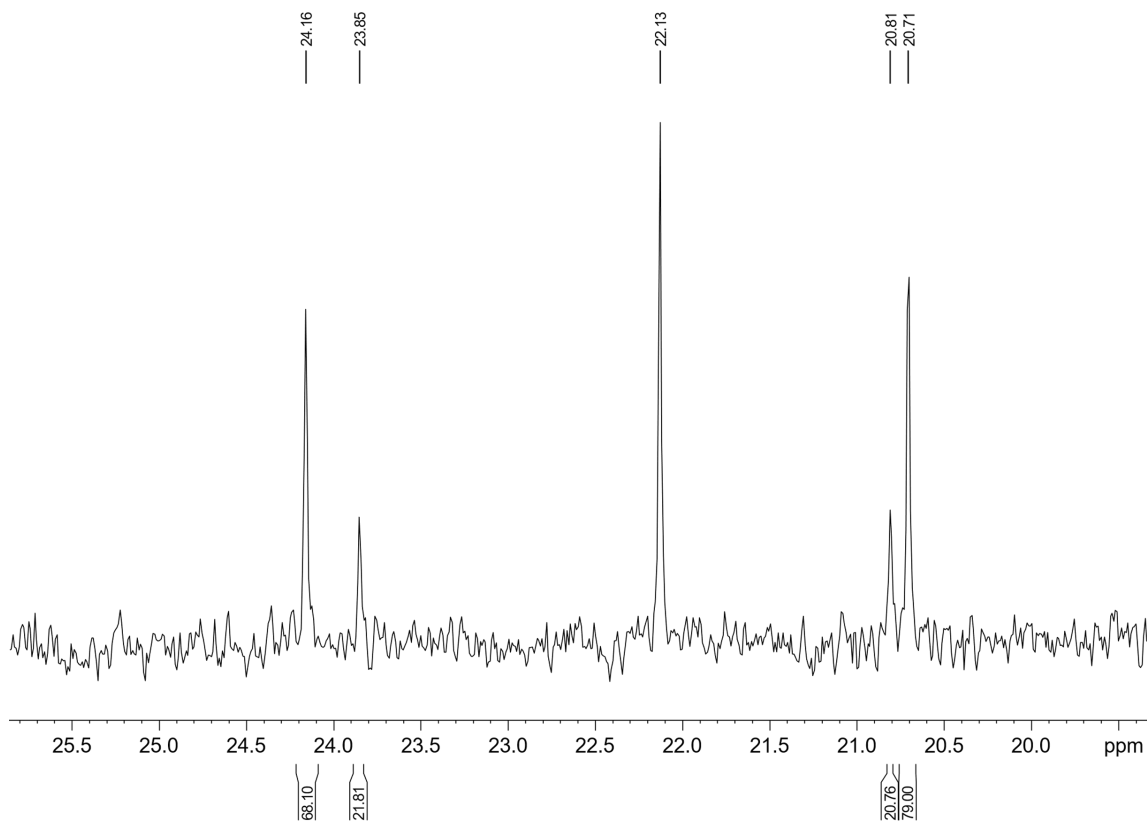

Product 14e

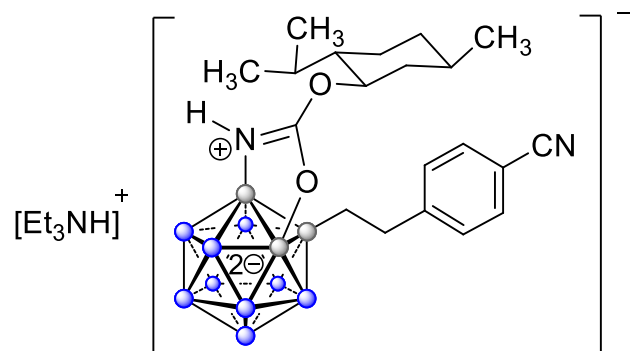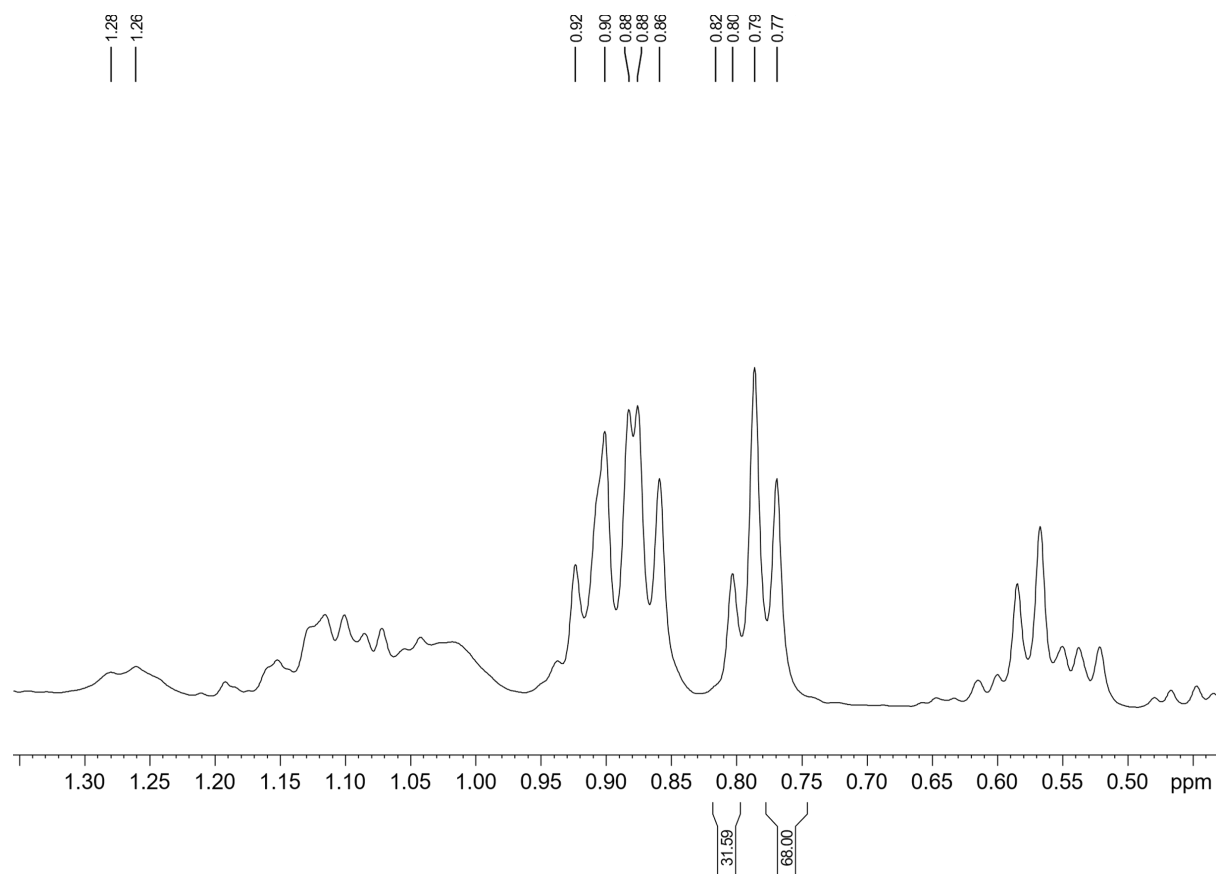

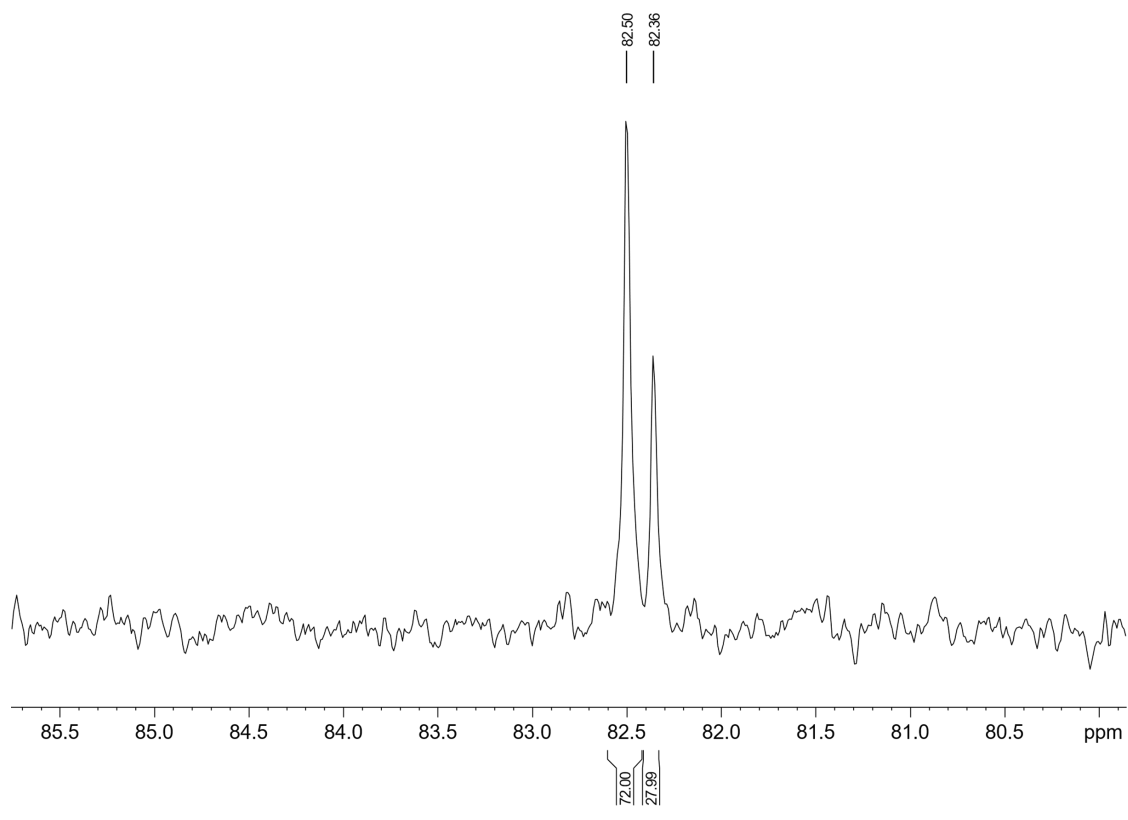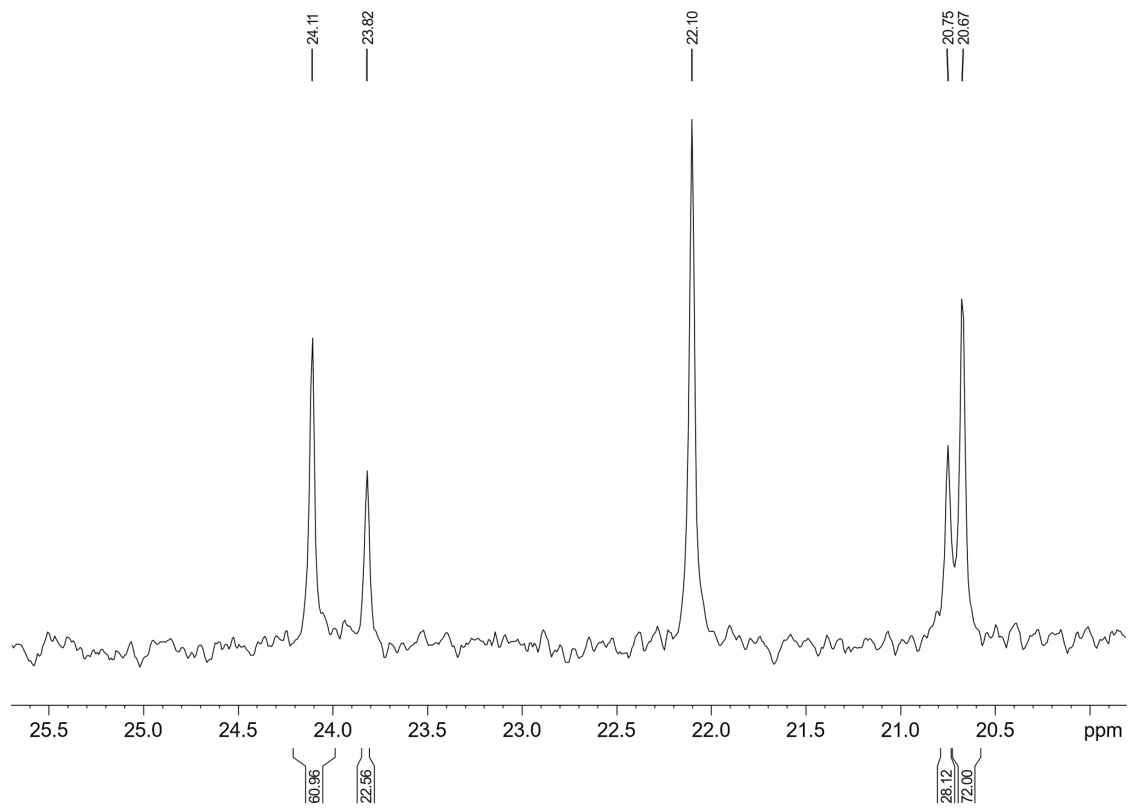

Product 14f

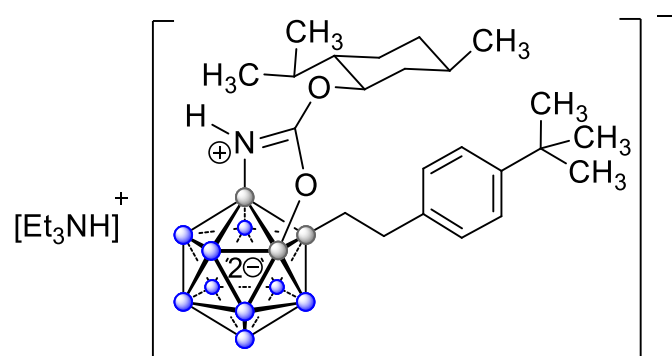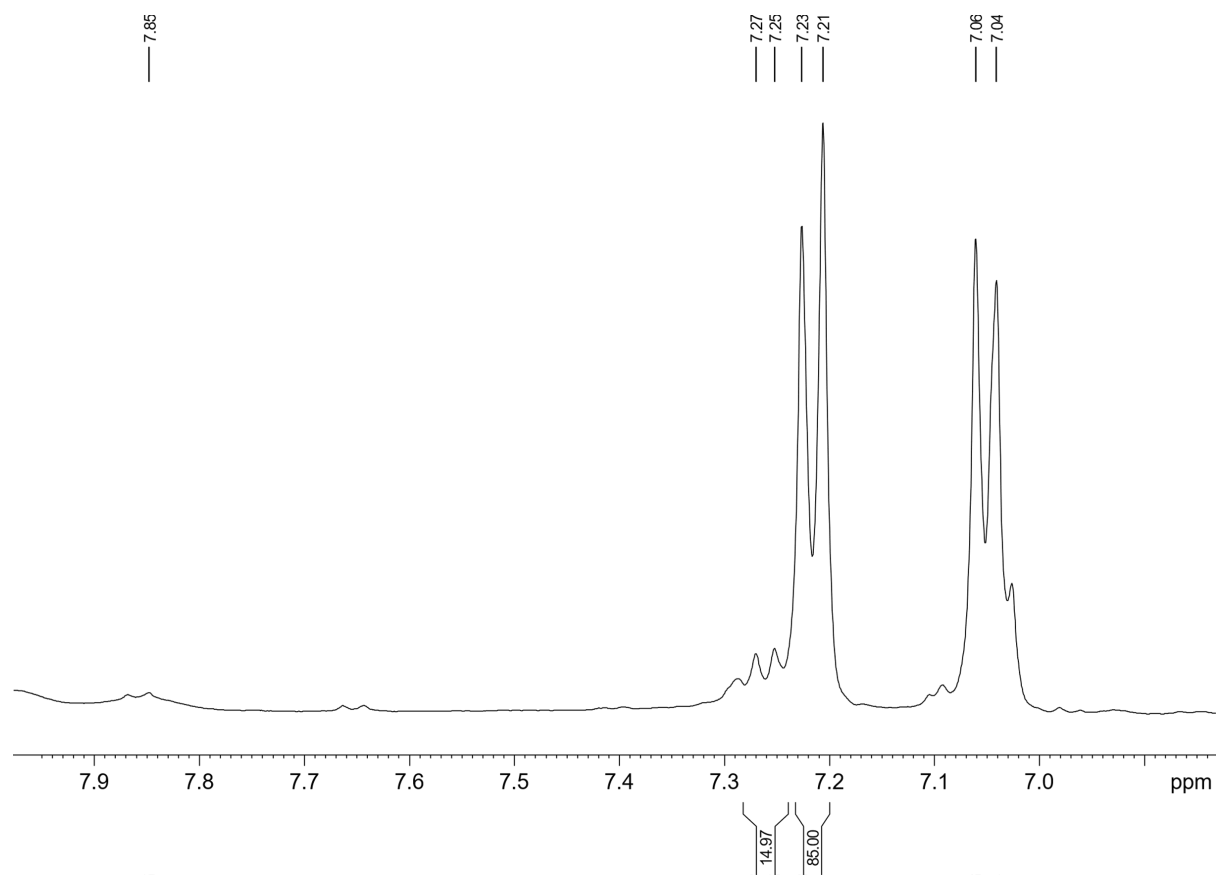

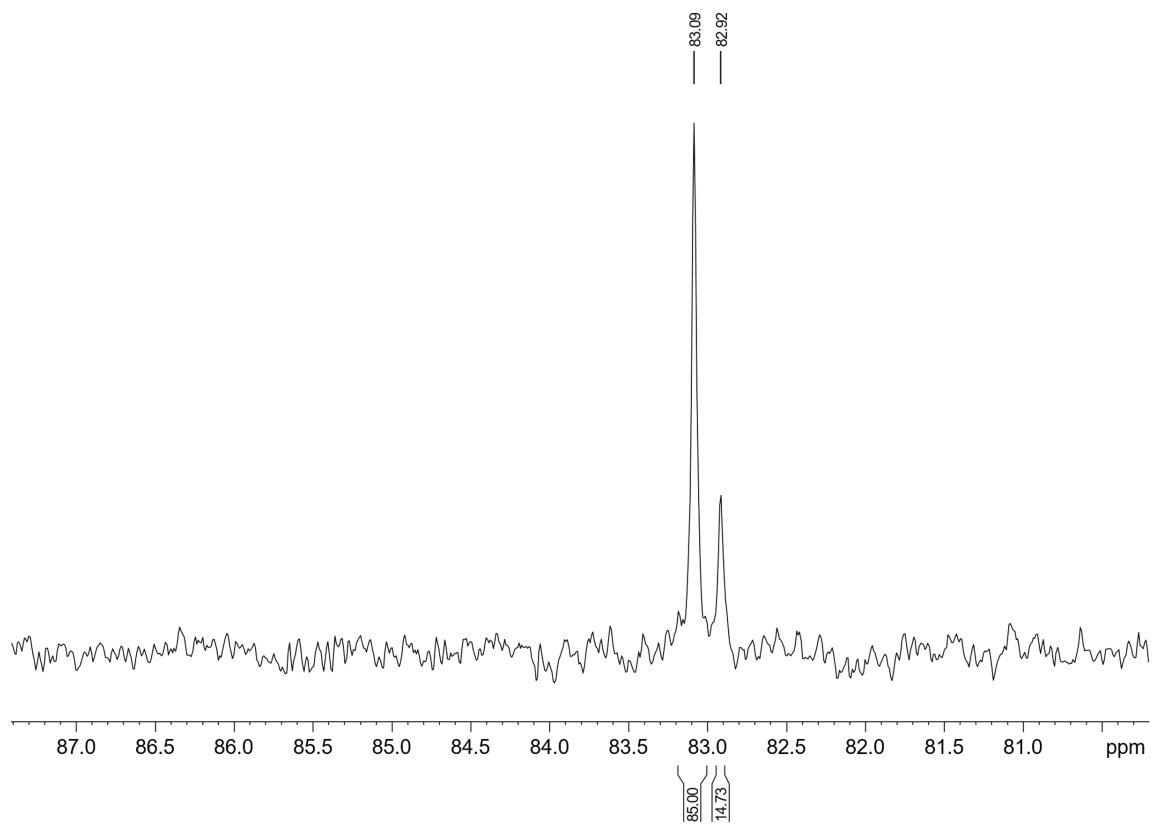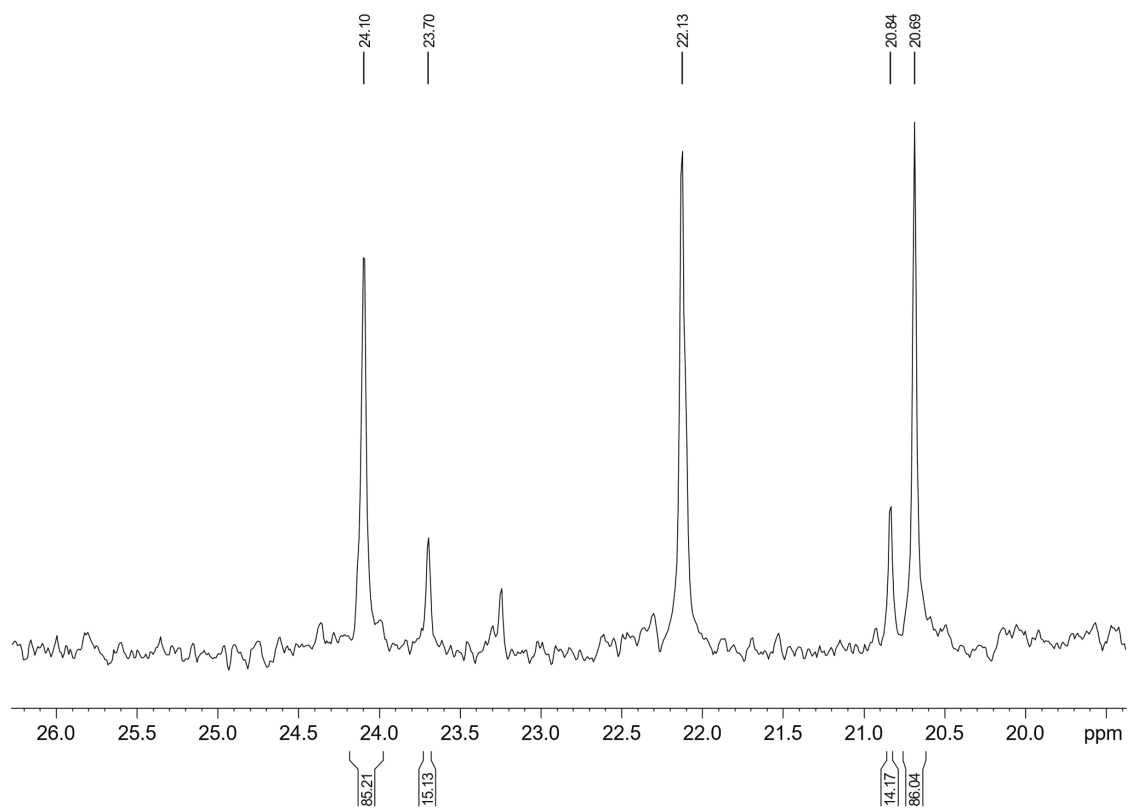





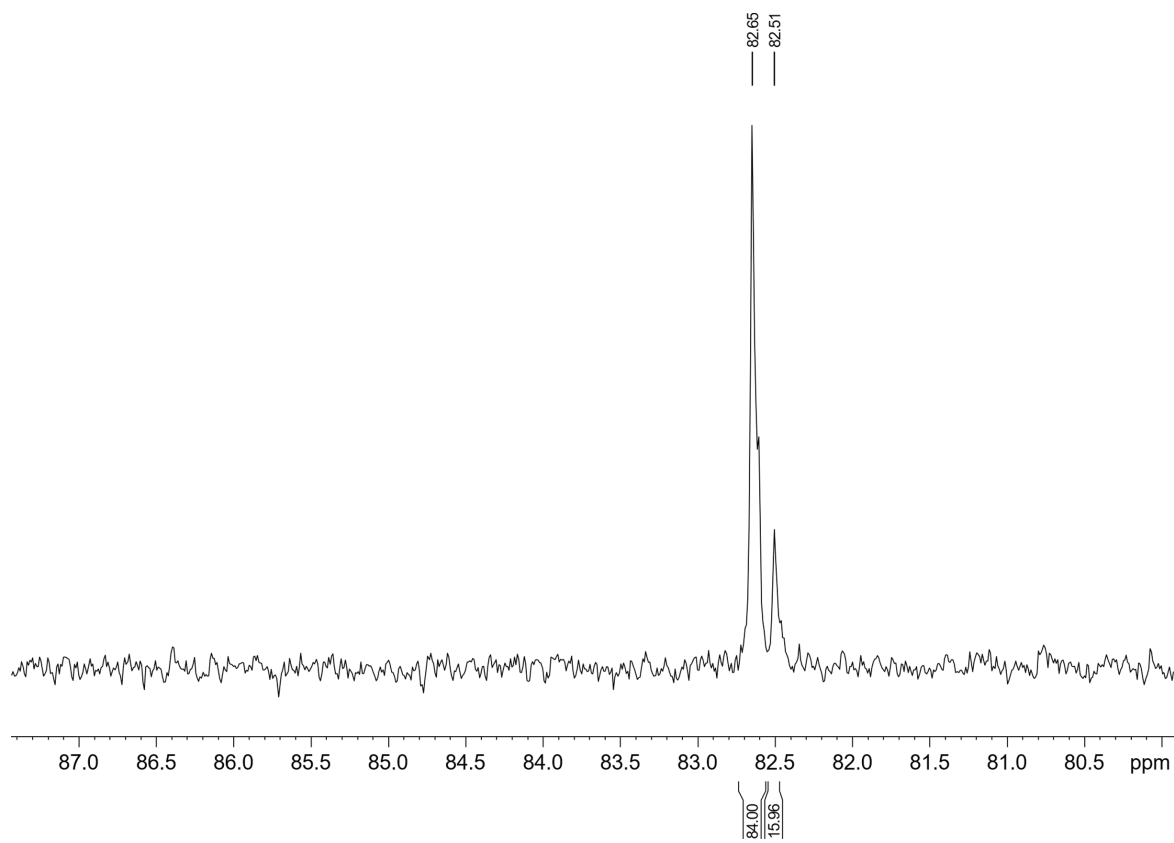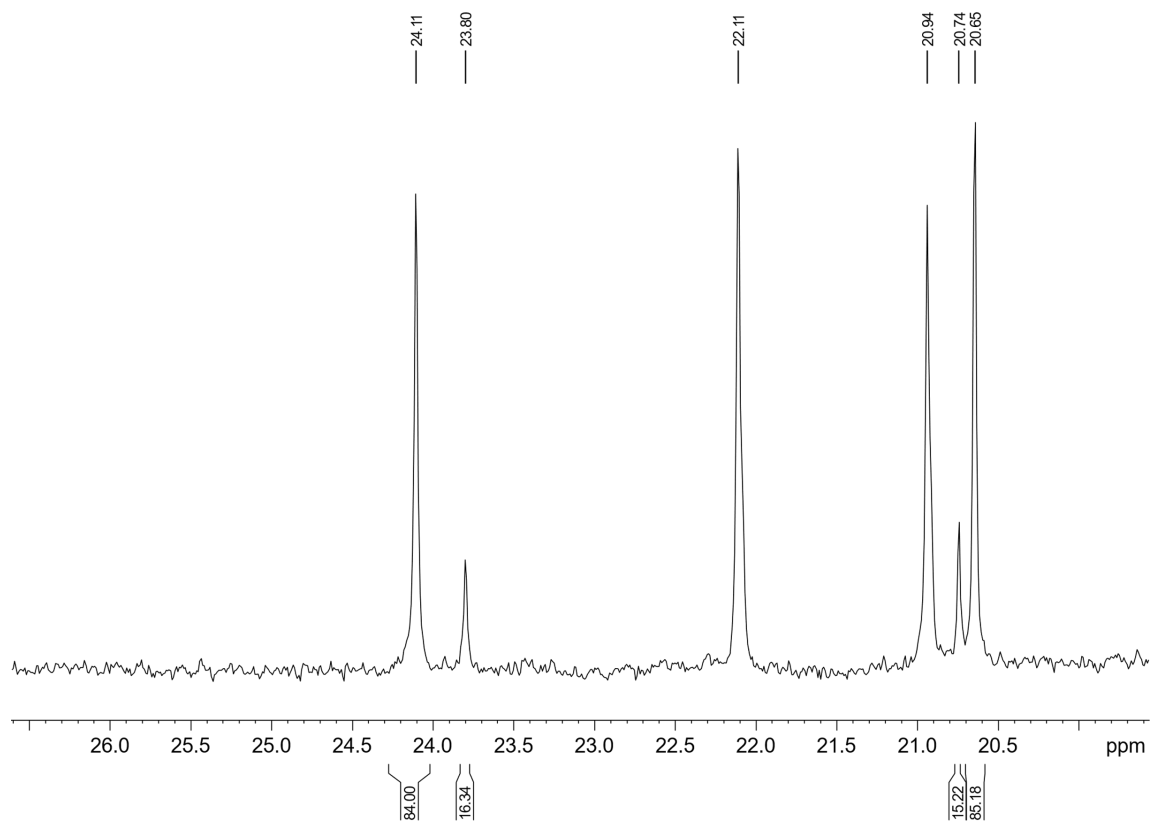

Product 14h

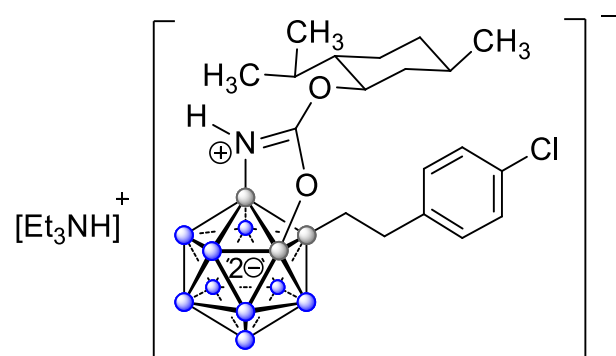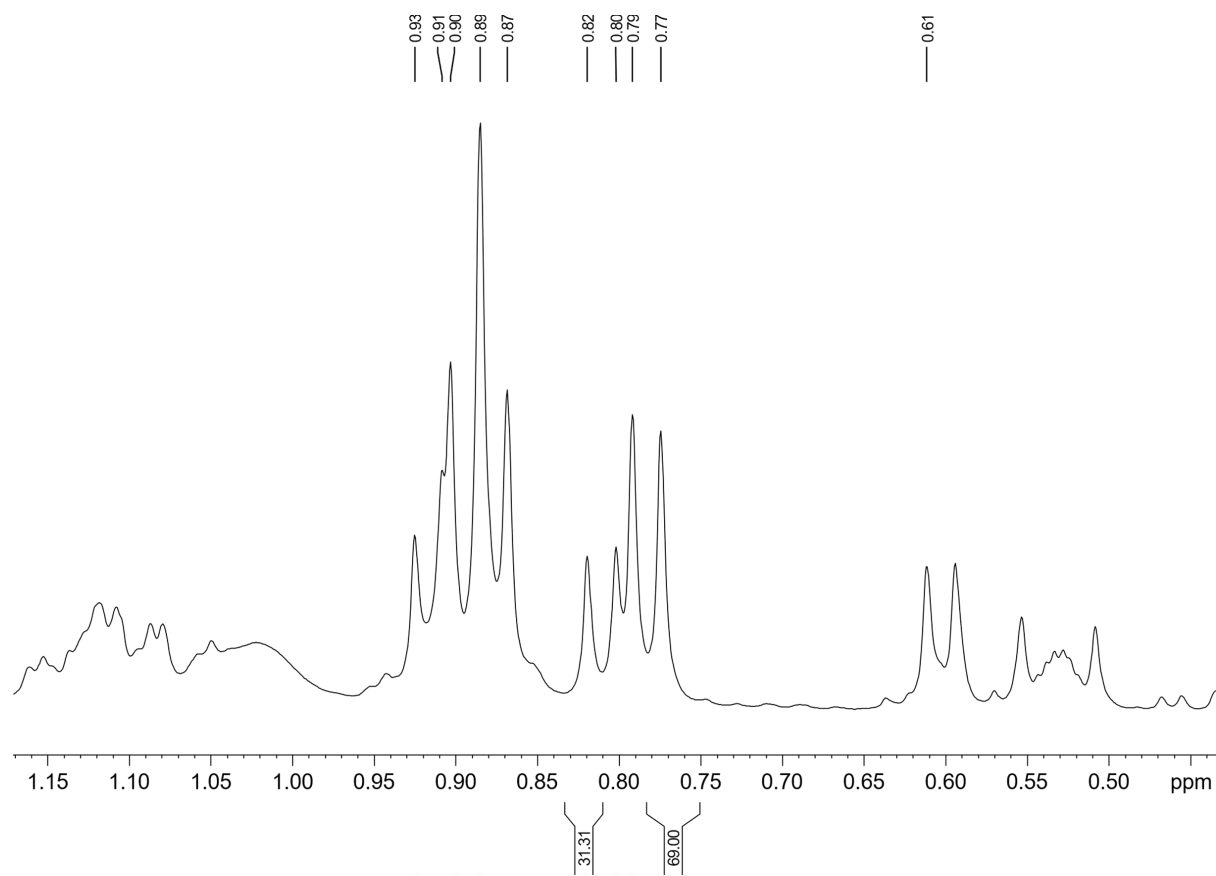

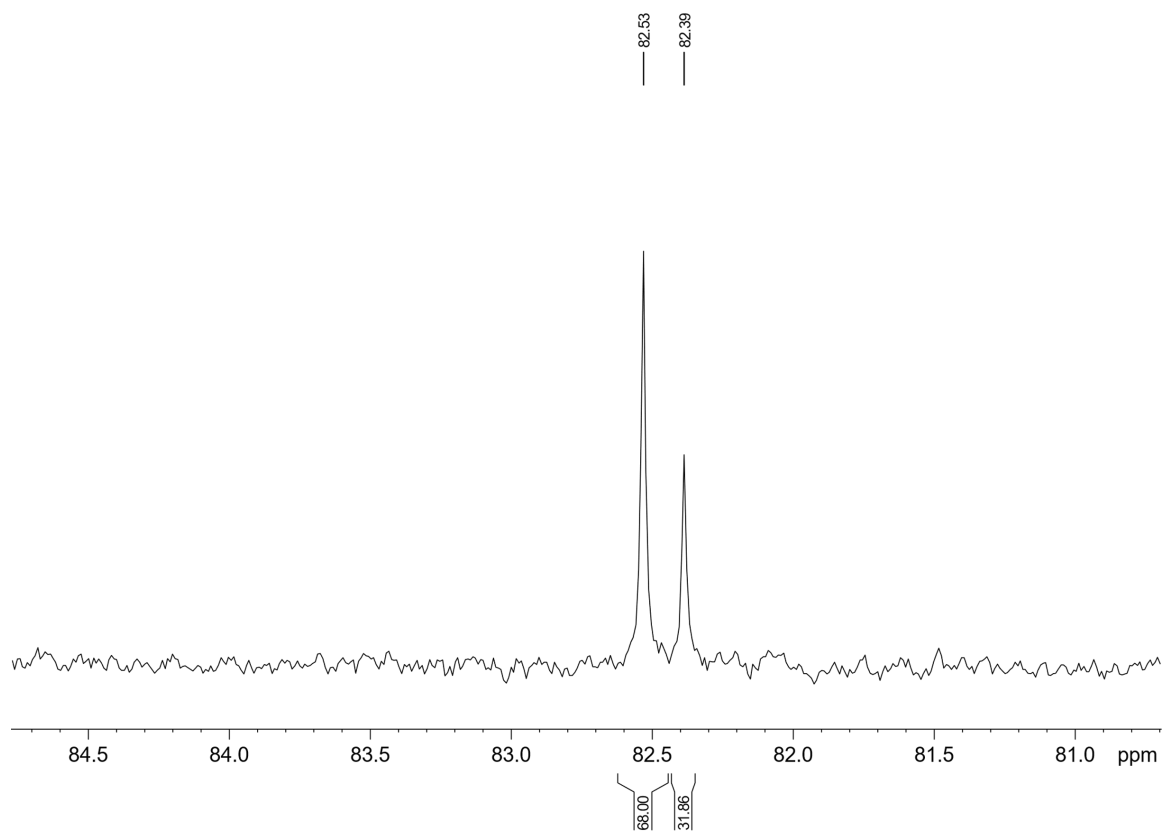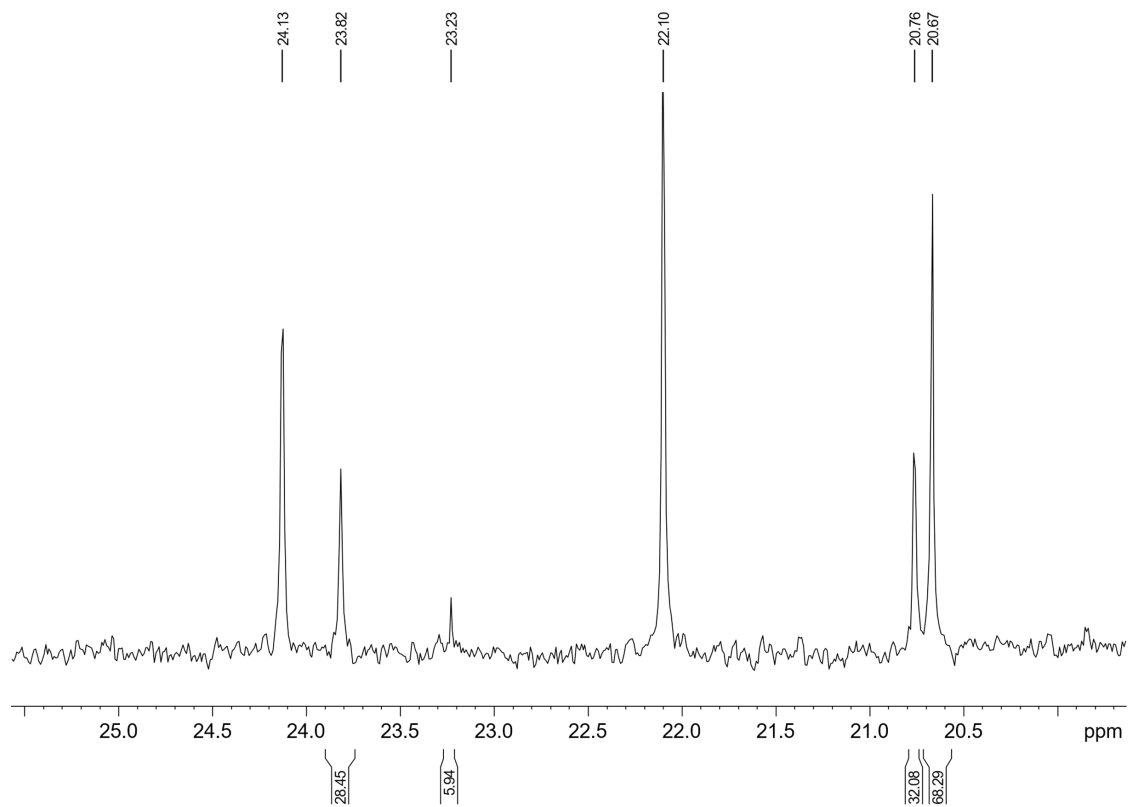

DR-028

Product 14i

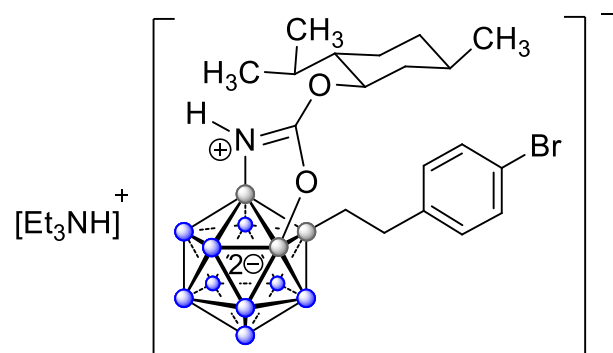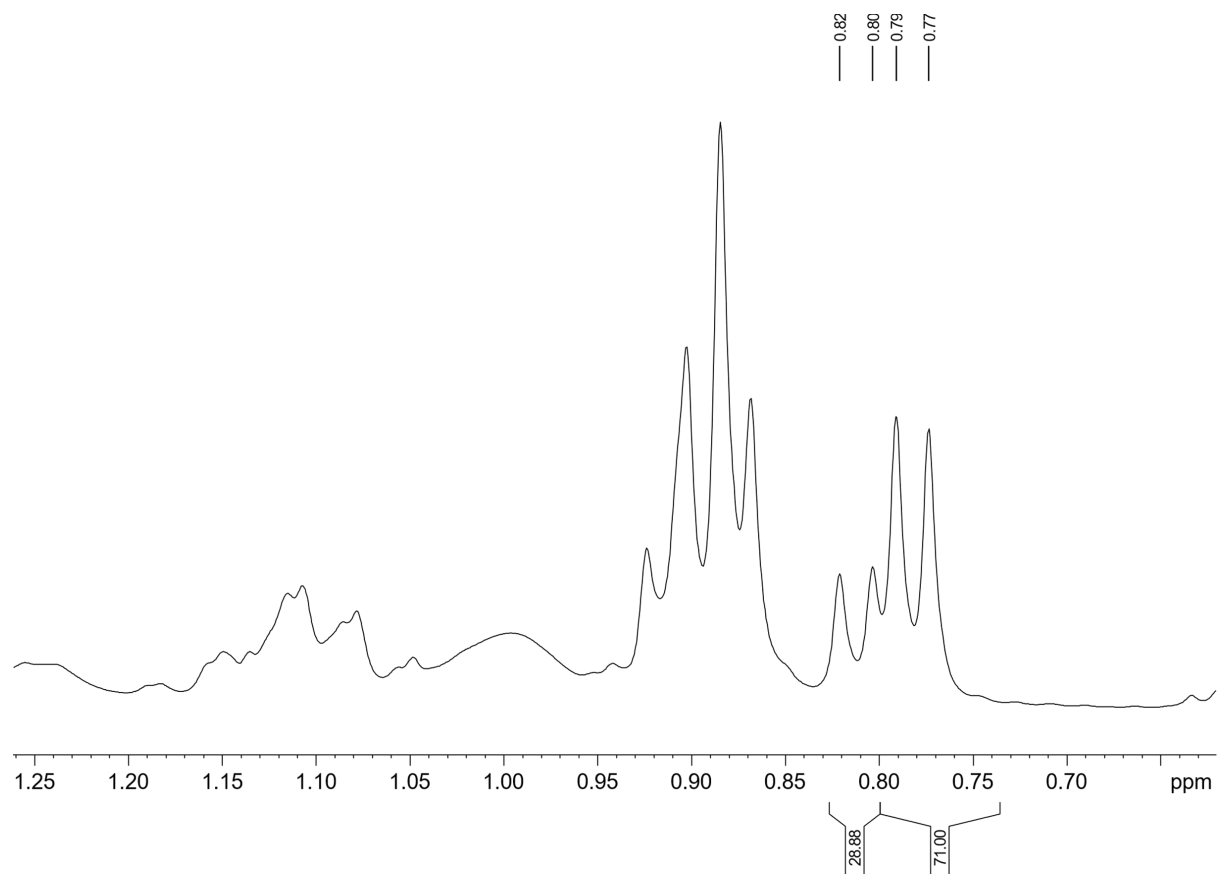

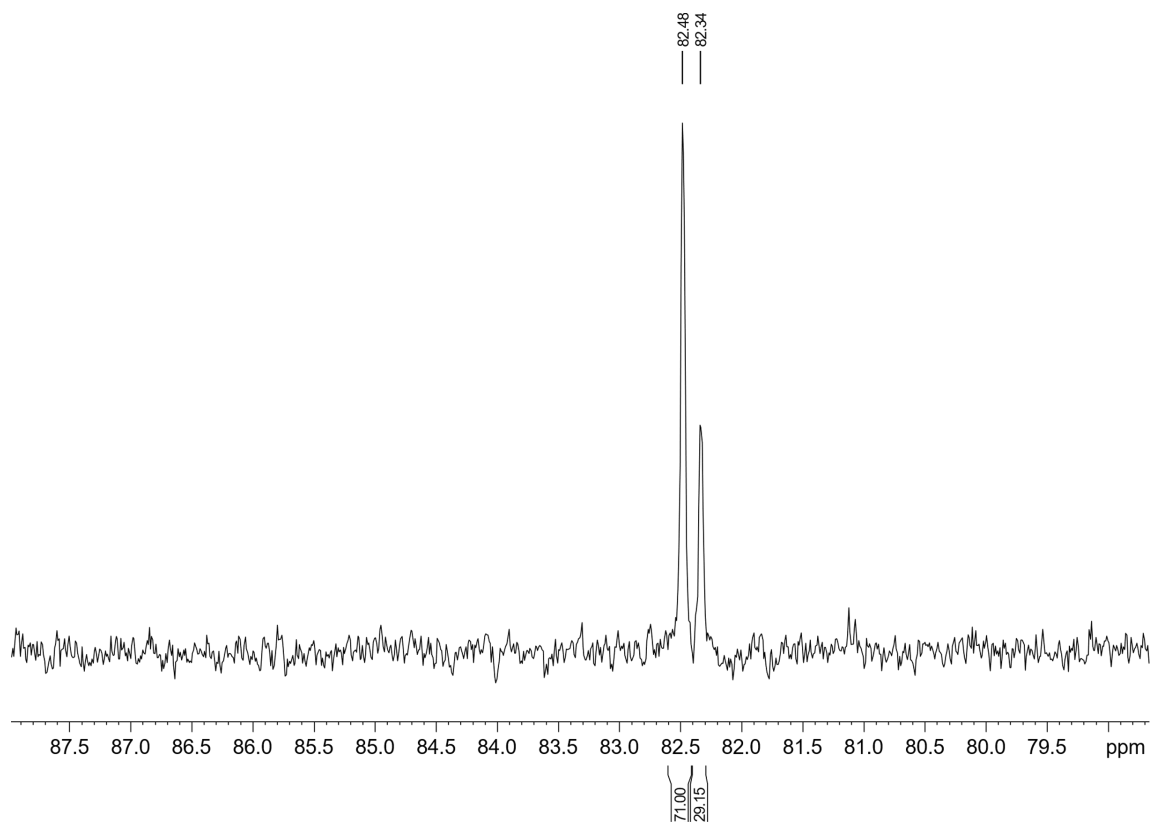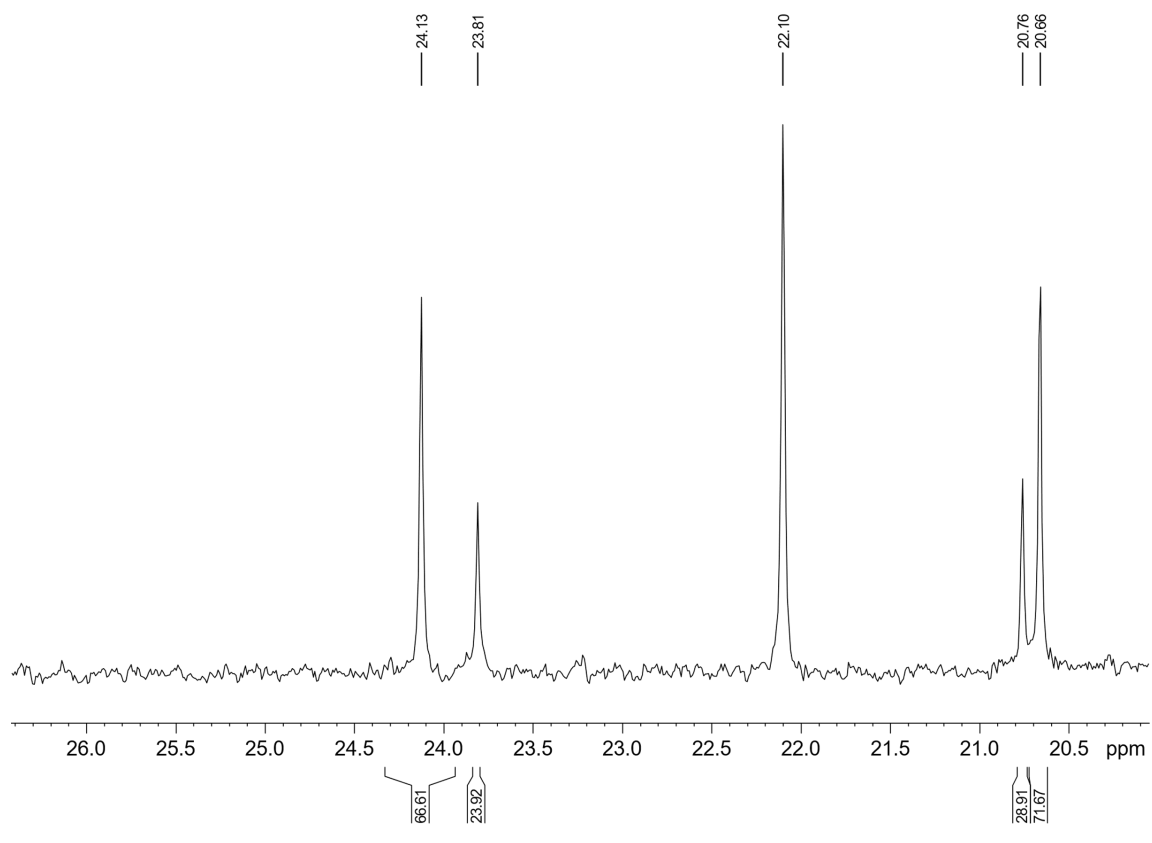

Product 14j

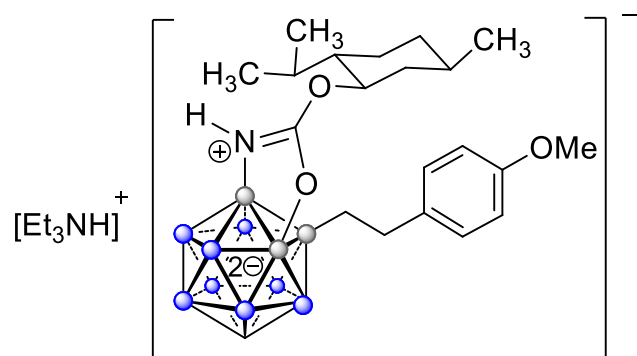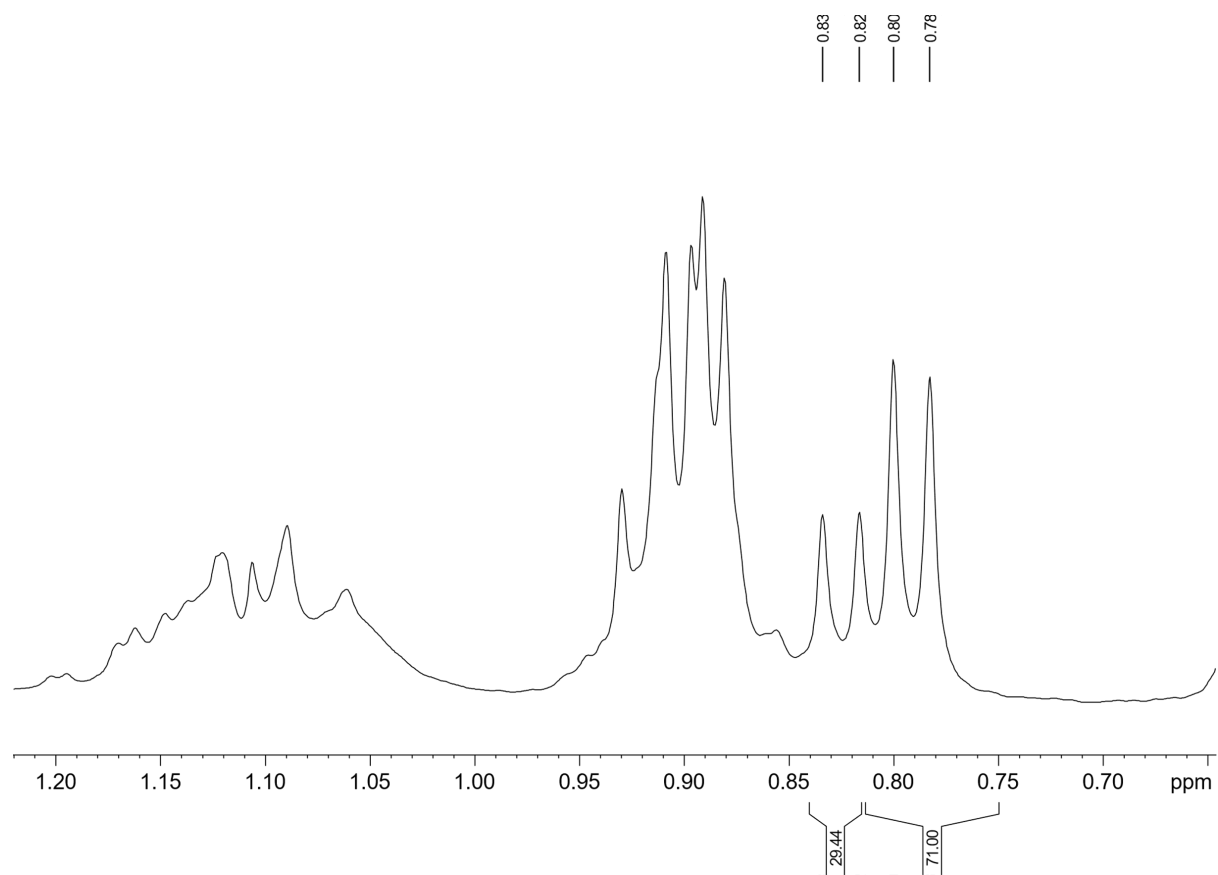

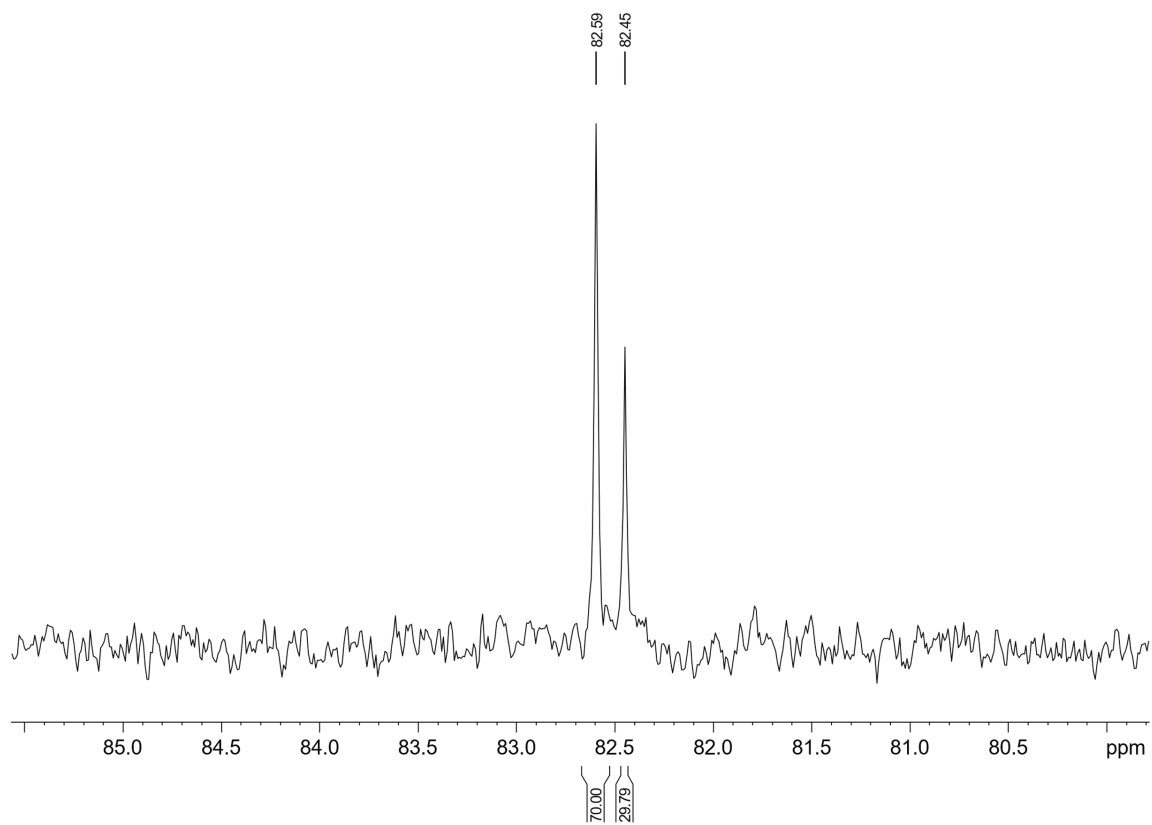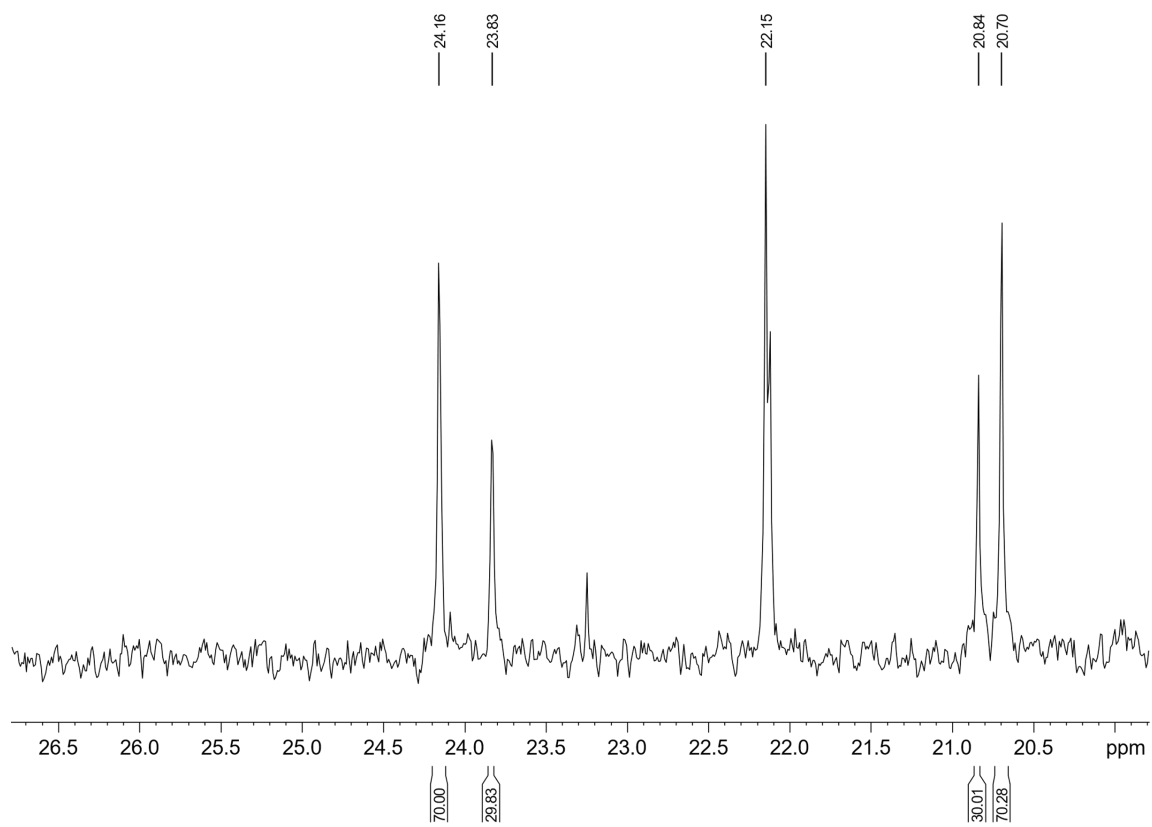

Product 14k

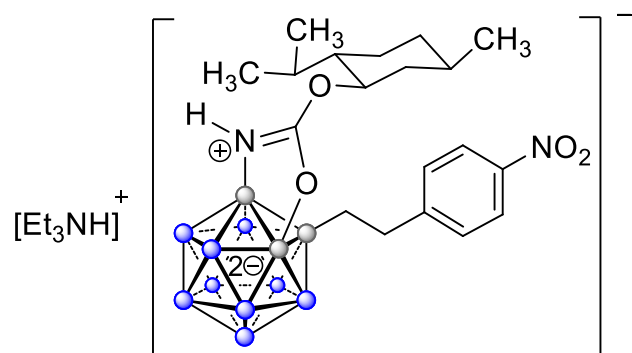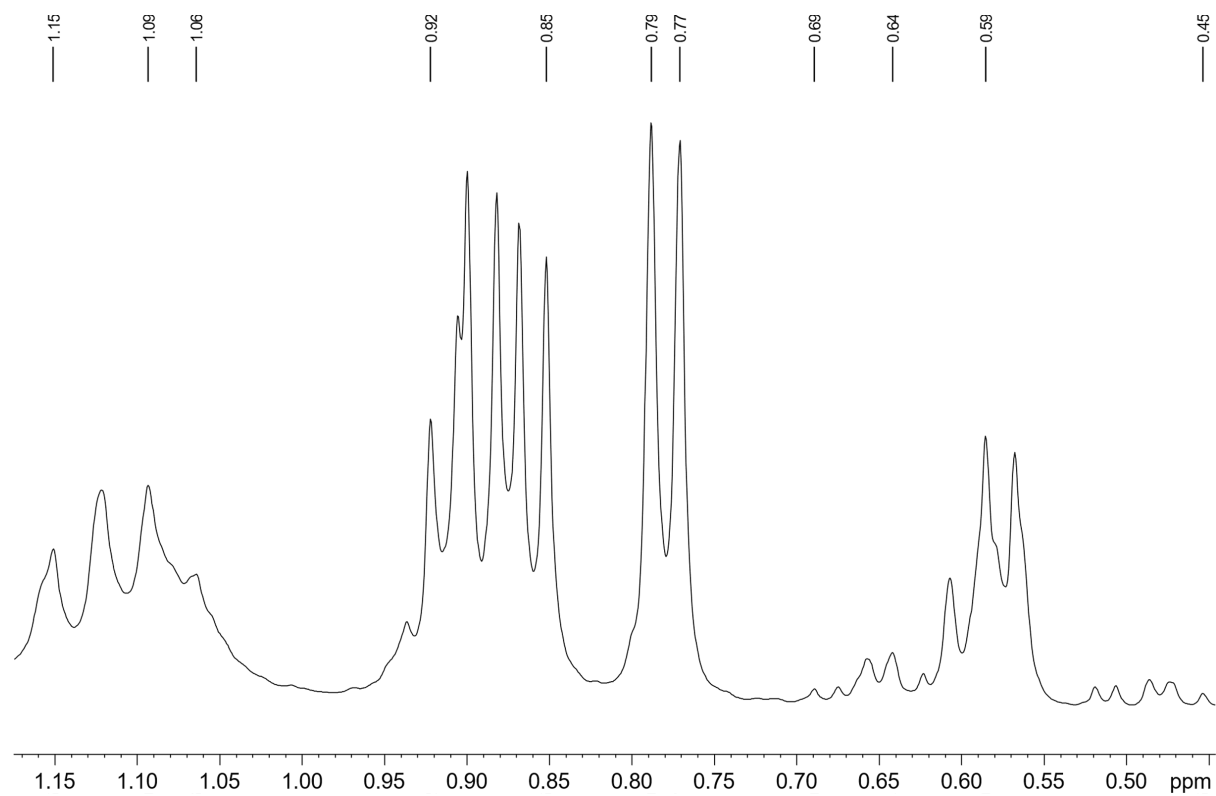



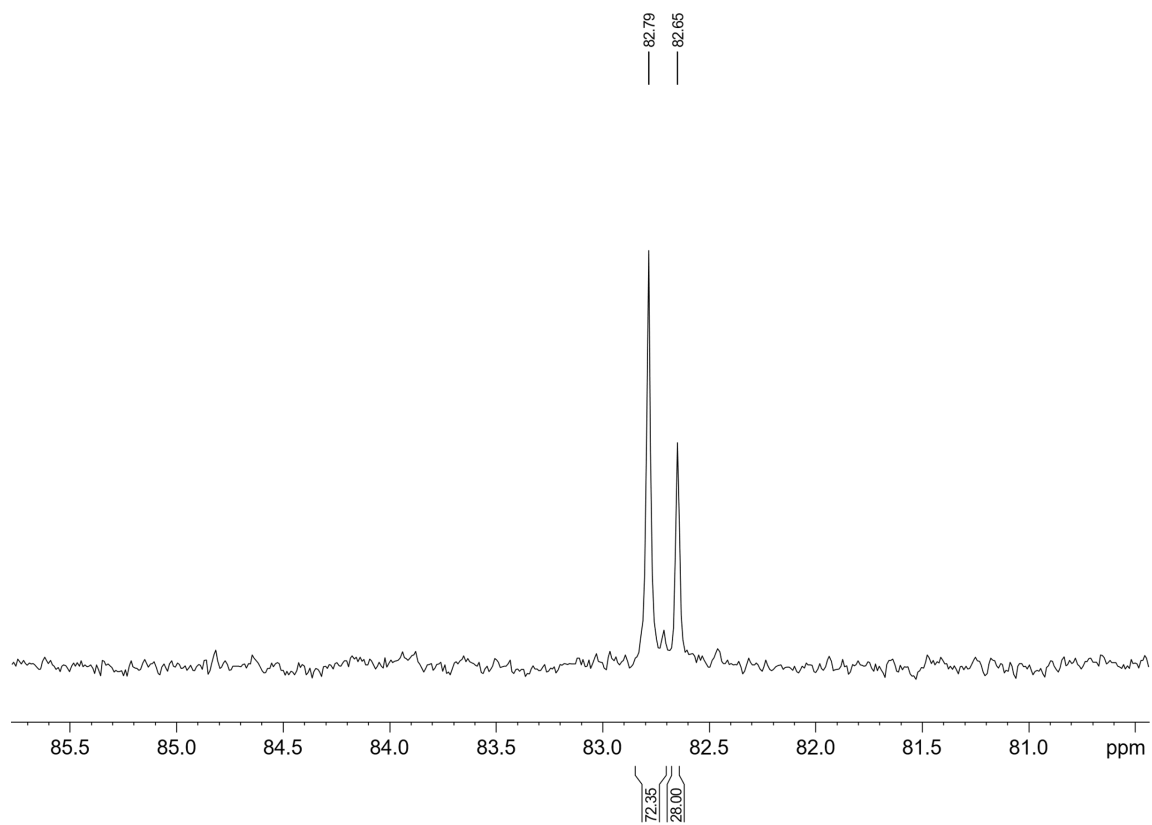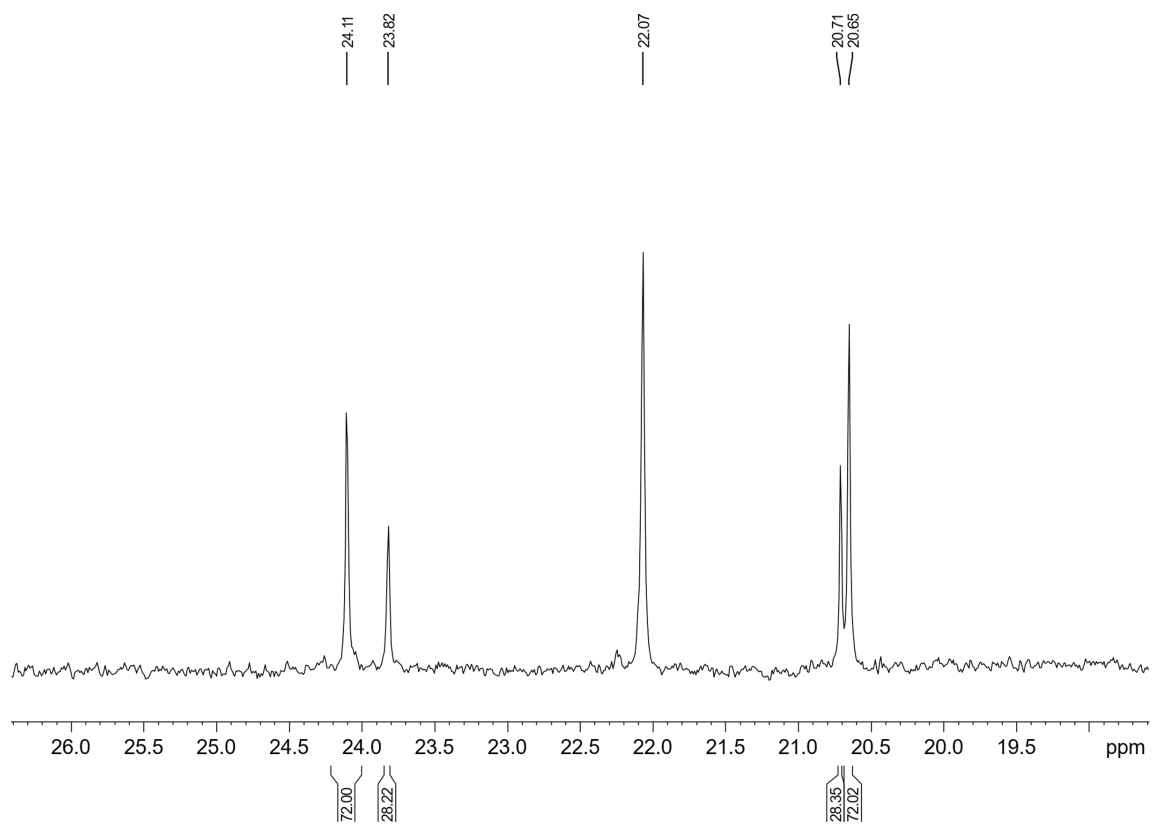

DR-034

Product 14I

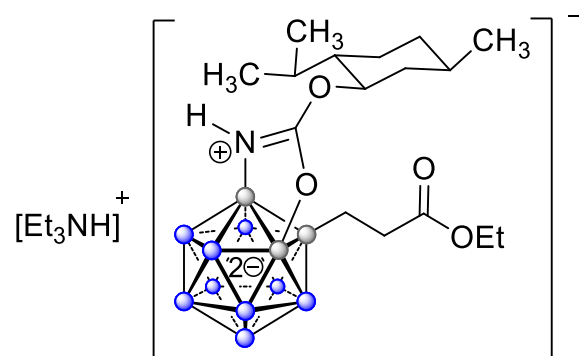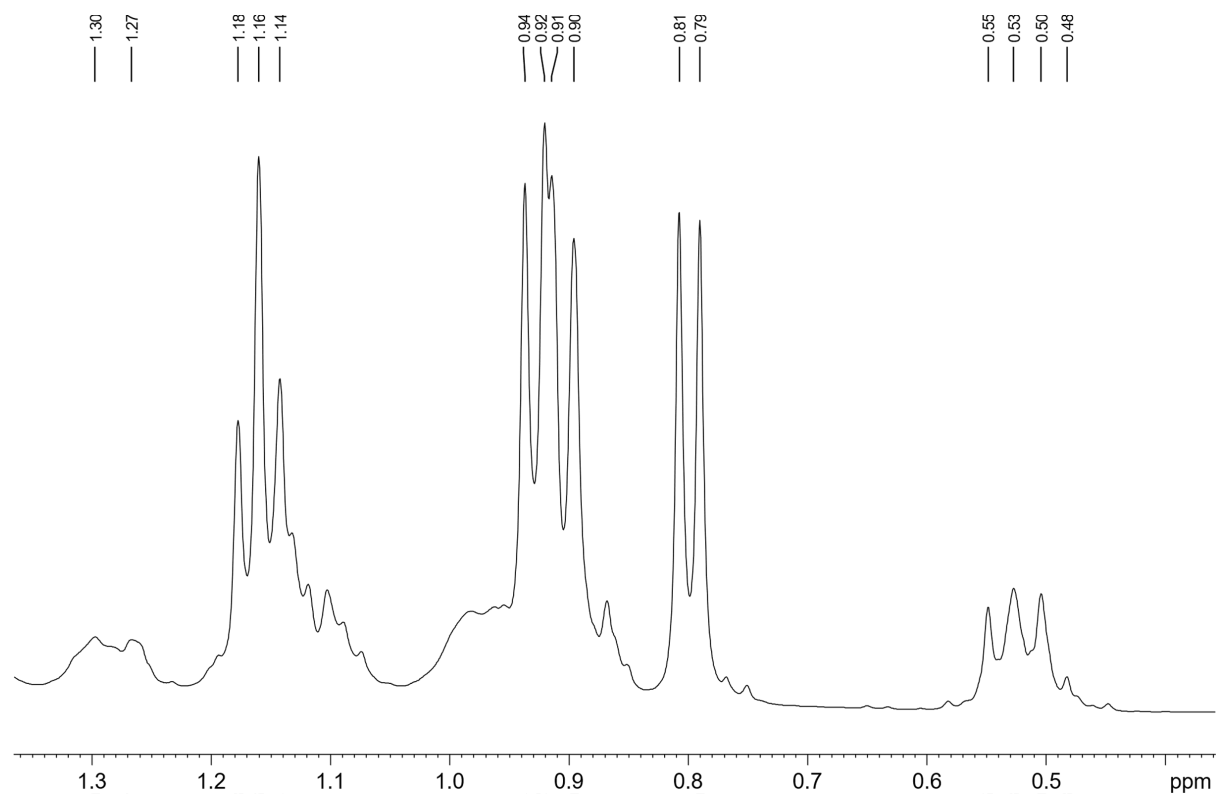

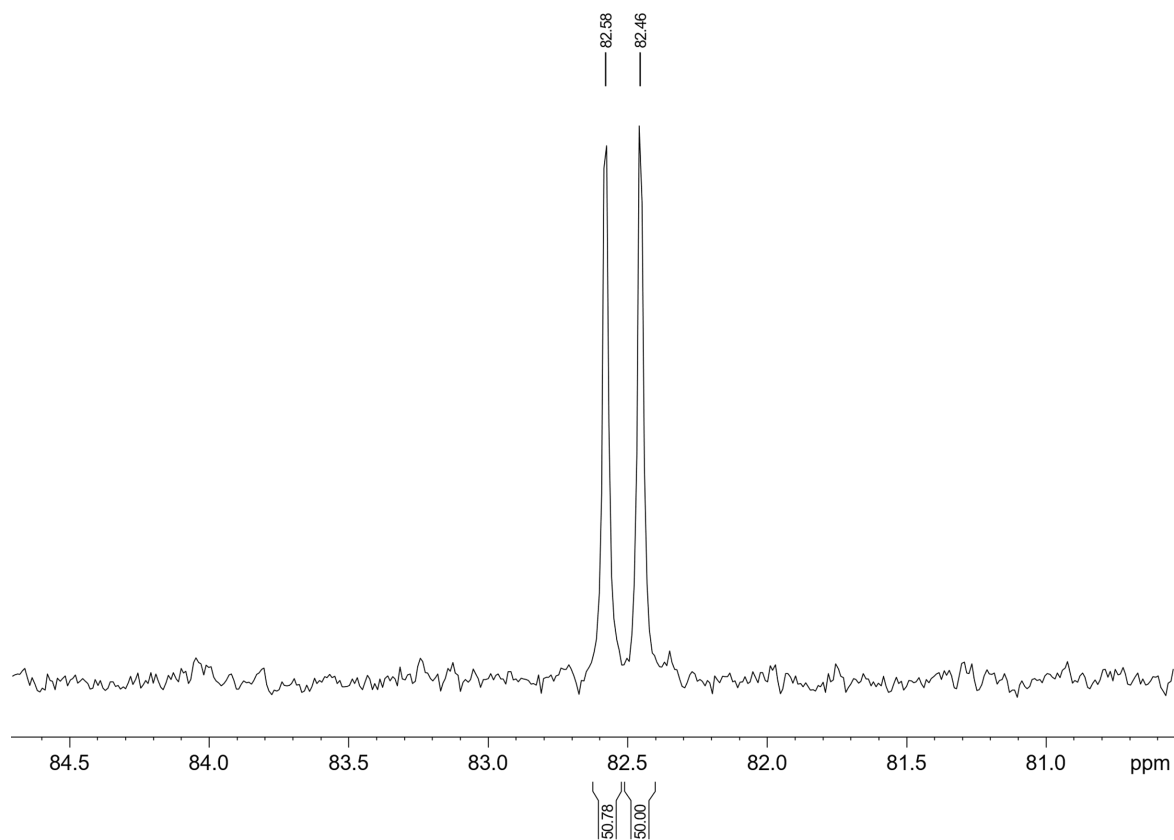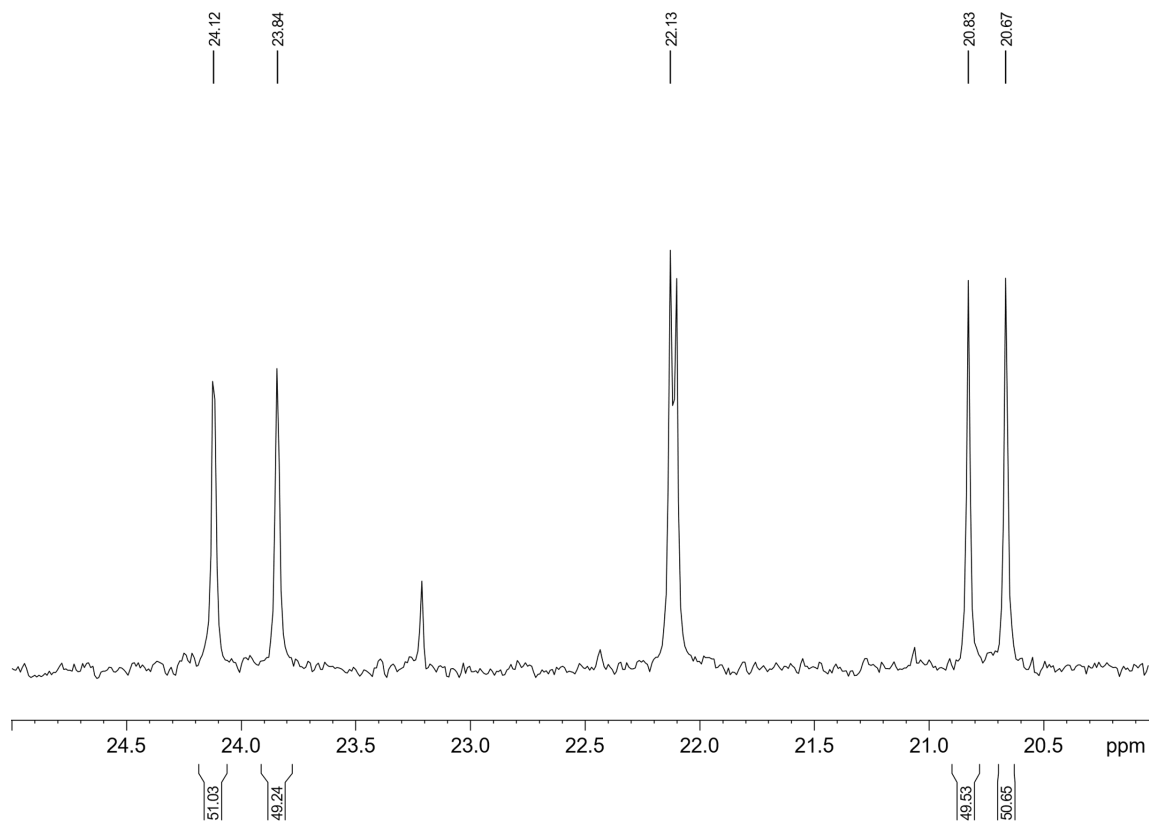

Product 14m

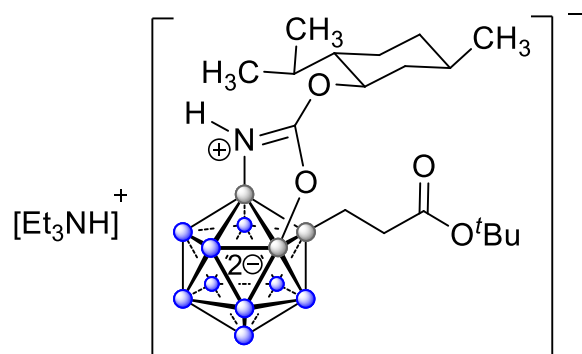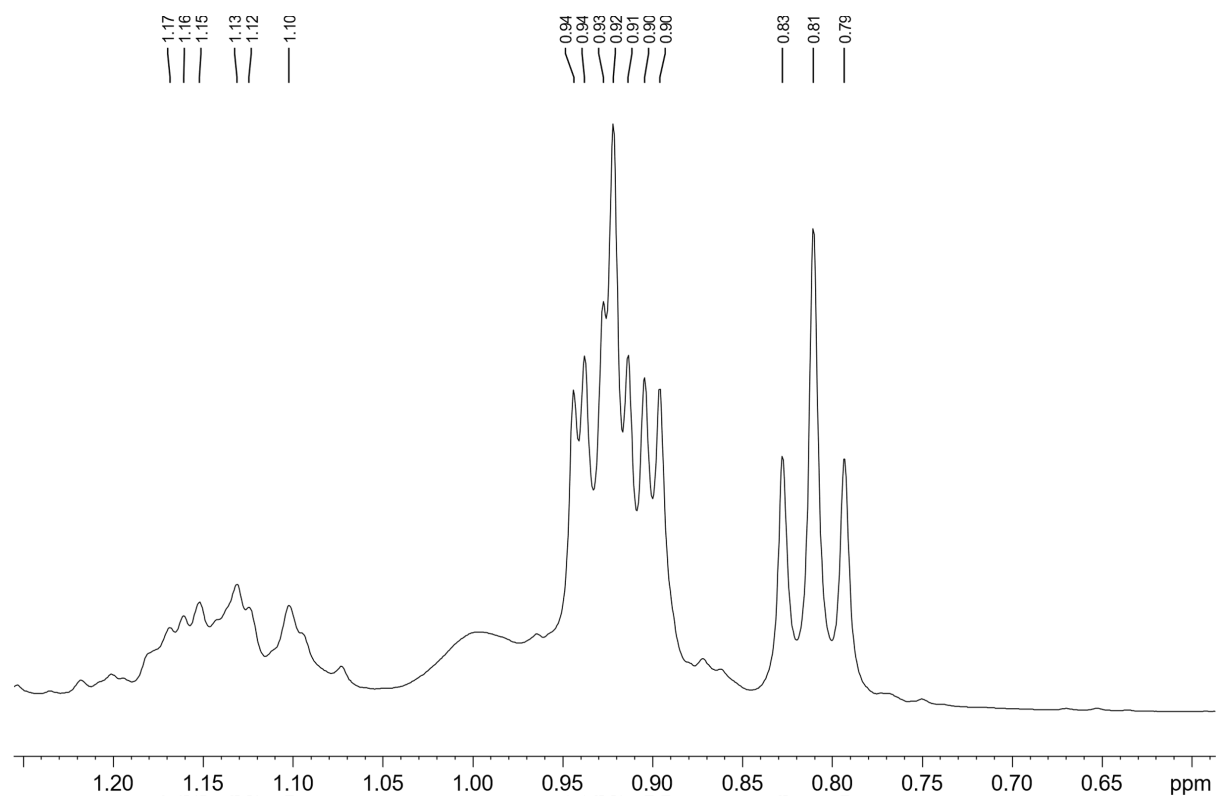

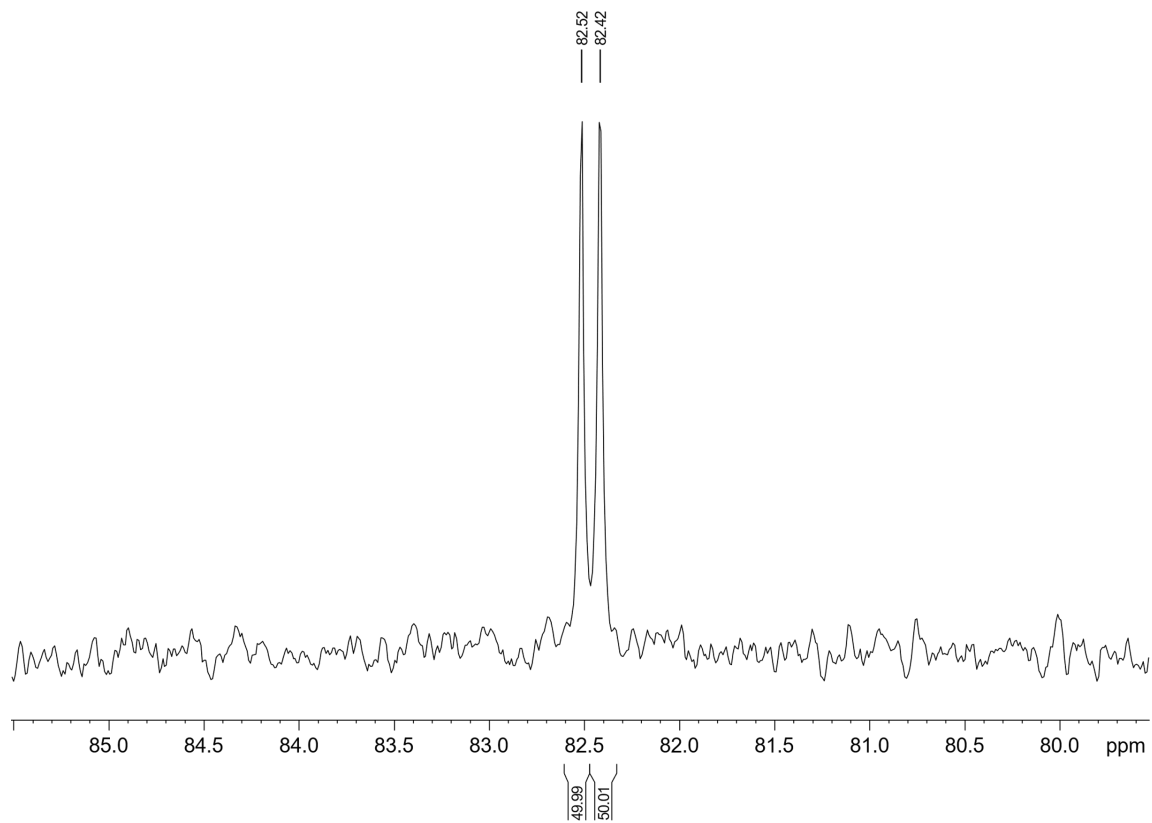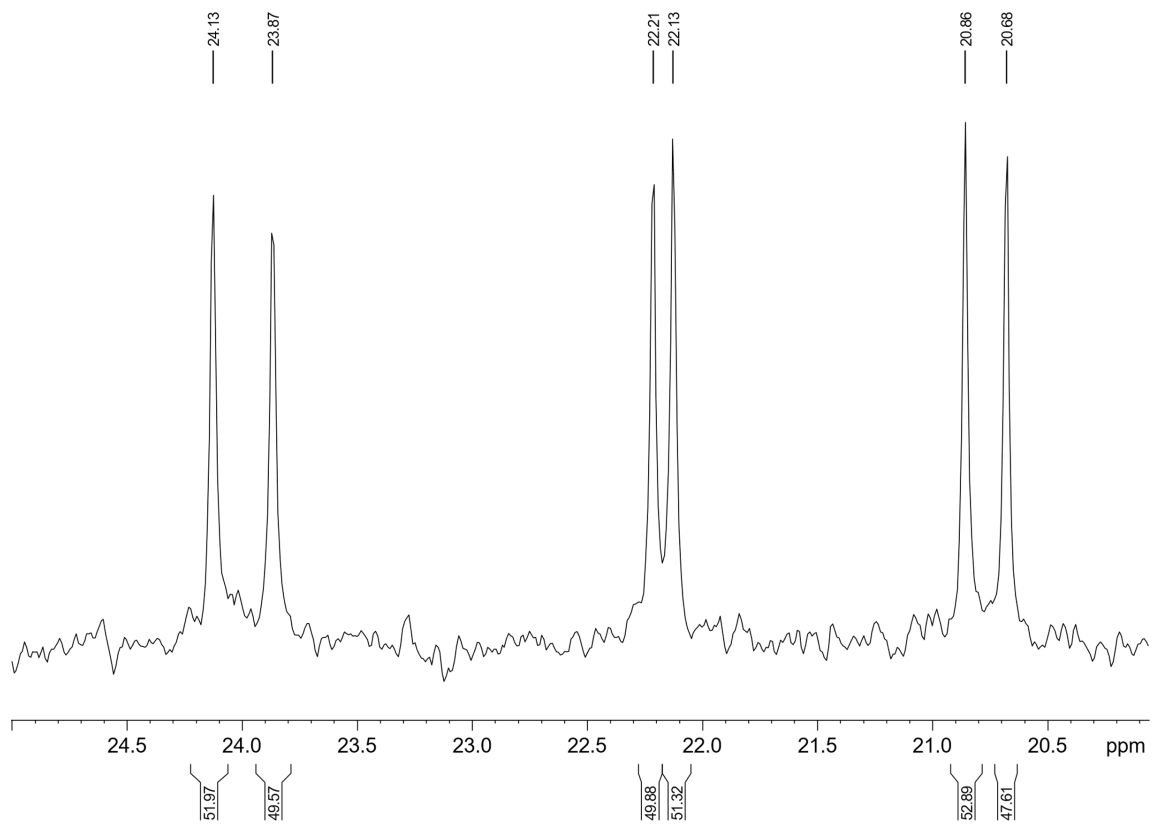

DR-038

Product 14n

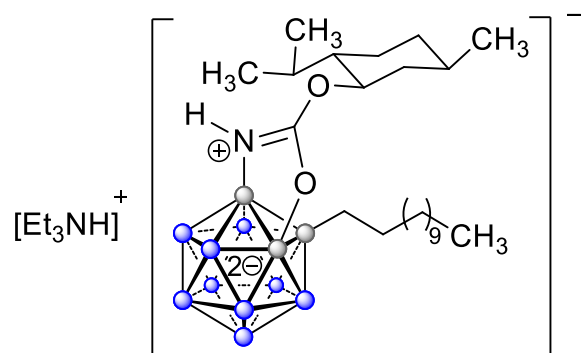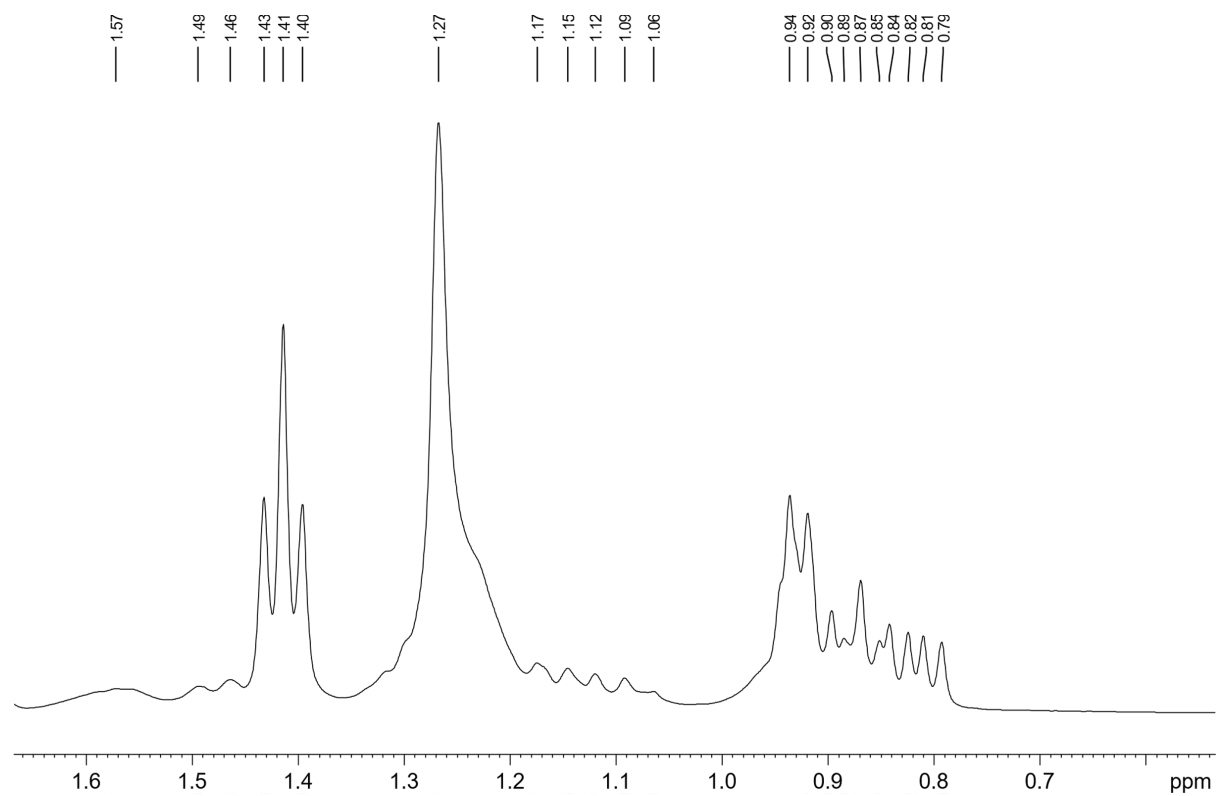

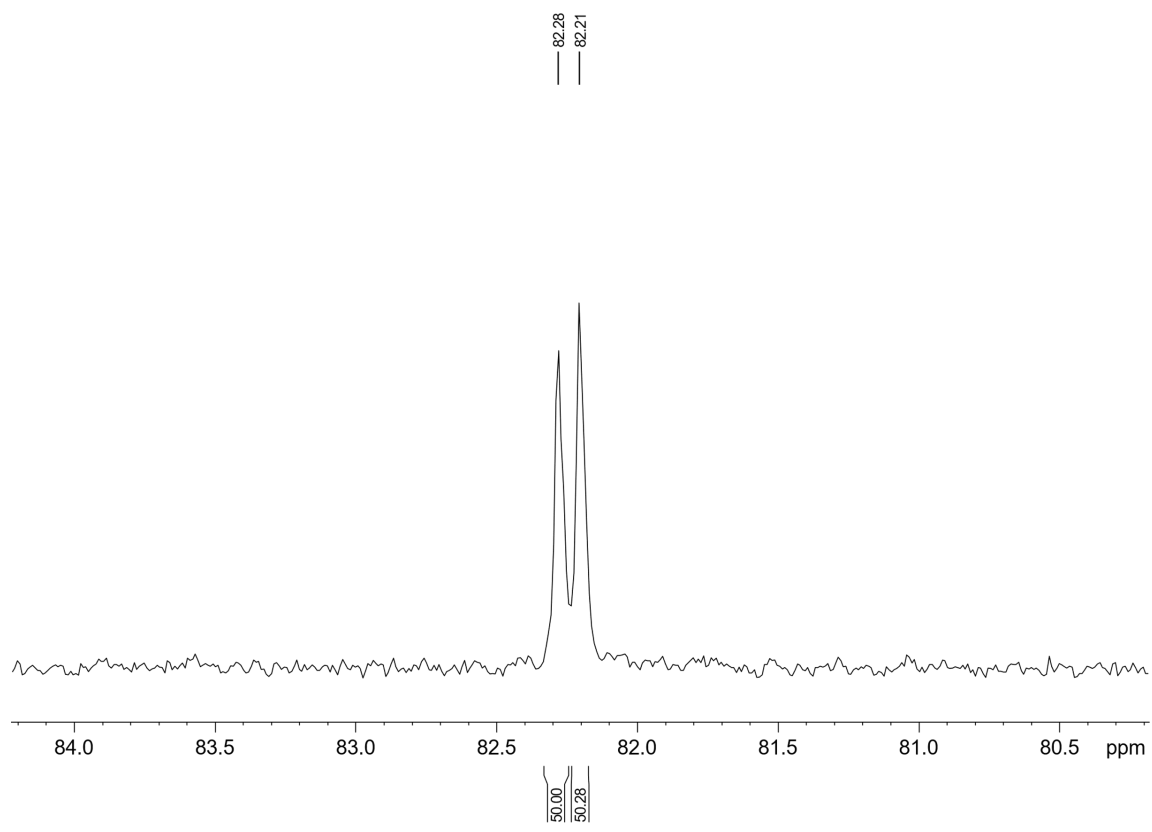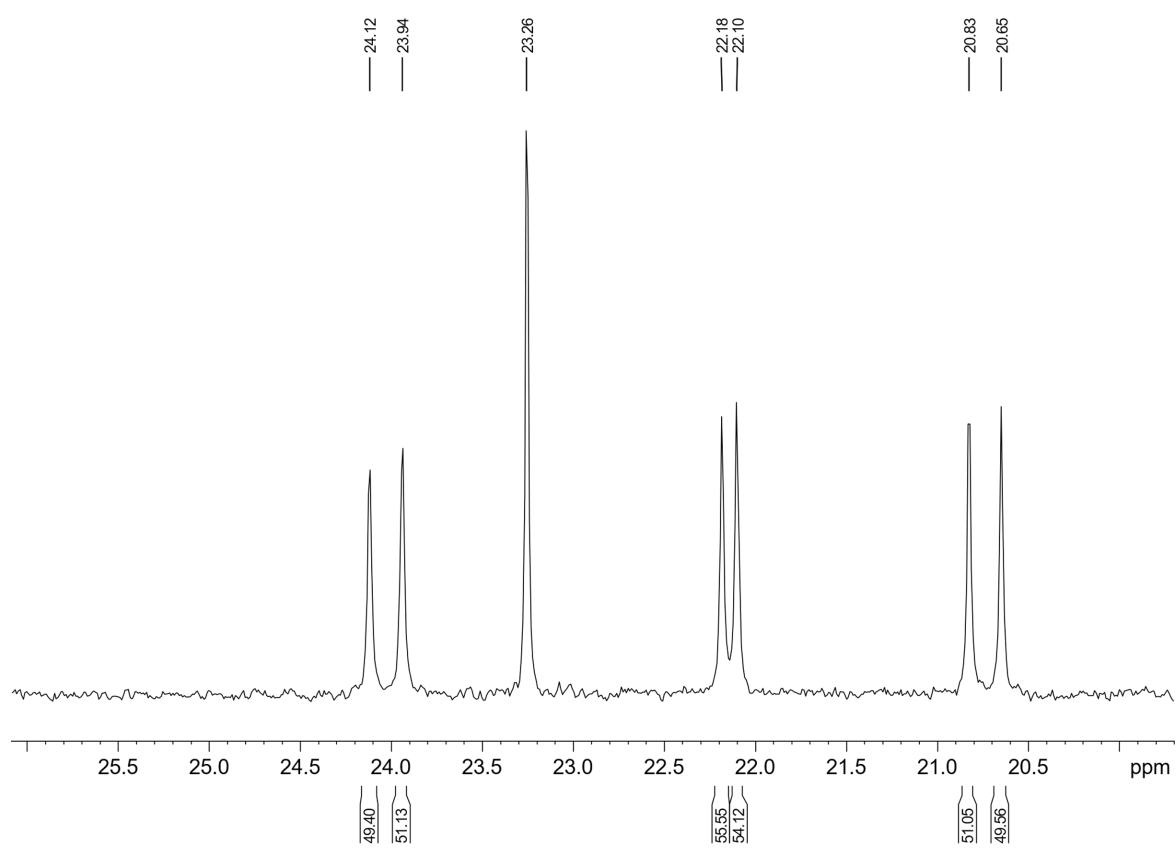

DR-040

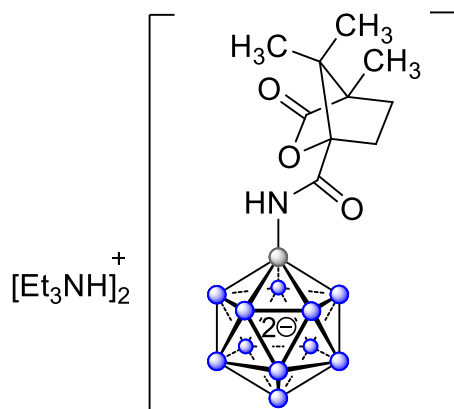

High resolution ESI-MS (negative mode, MeOH):

for  $[\text{C}_{10}\text{H}_{25}\text{B}_{12}\text{NO}_3 - \text{H}]^-$ : 336.2945; Found: 336.2949.

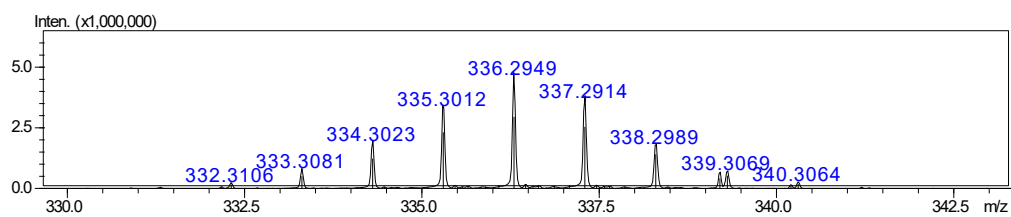



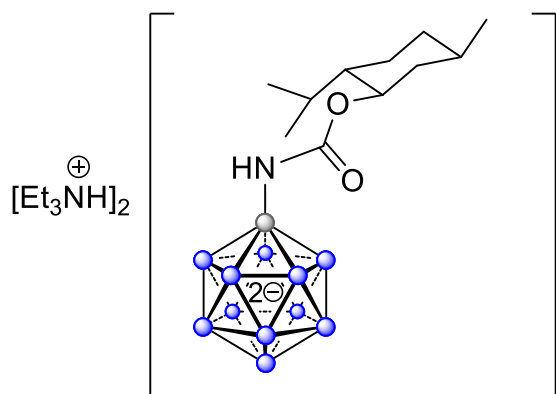

High resolution ESI-MS (negative mode, MeOH):

$m/z$  calcd for [C<sub>11</sub>H<sub>31</sub>B<sub>12</sub>NO<sub>2</sub> - H]<sup>-</sup>: 338.3465; Found: 338.3475

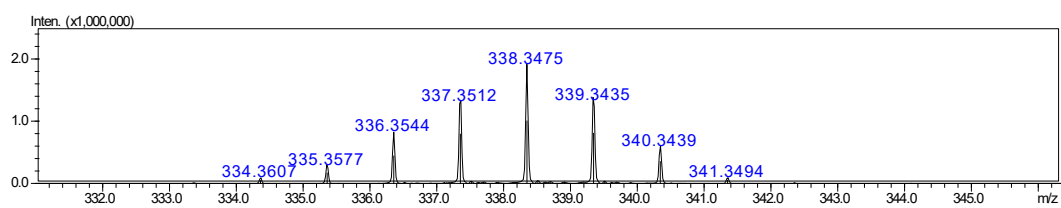



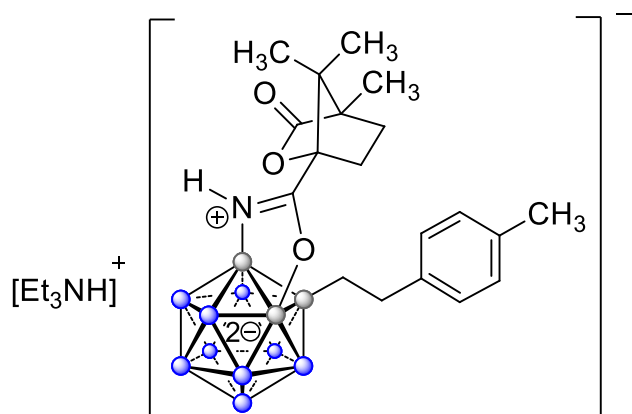

High resolution ESI-MS (negative mode, MeOH):  
 for [C<sub>19</sub>H<sub>34</sub>B<sub>12</sub>NO<sub>3</sub>]<sup>-</sup>: 454.3728; Found: 454.3731.

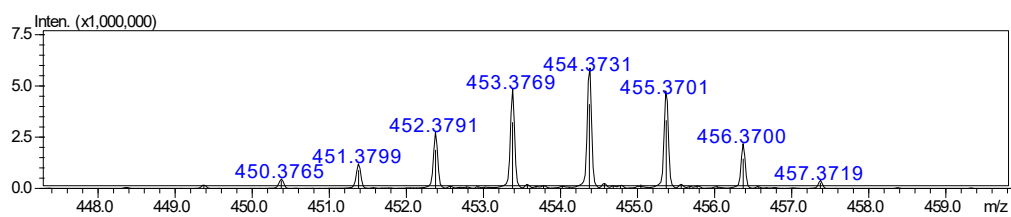

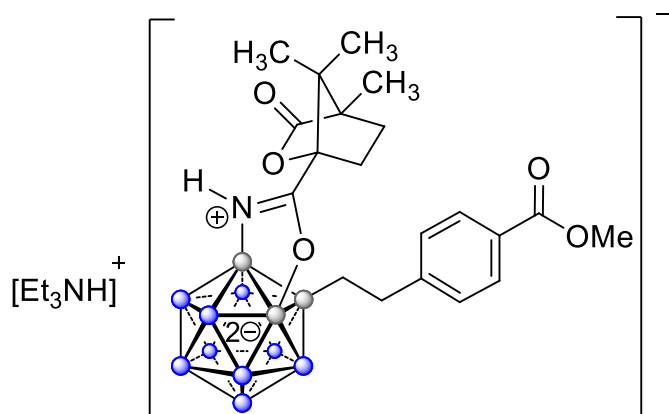

High resolution ESI-MS (negative mode, MeOH):  
 for  $[C_{20}H_{34}B_{12}NO_5]^-$ : 498.3626; Found: 498.3628.

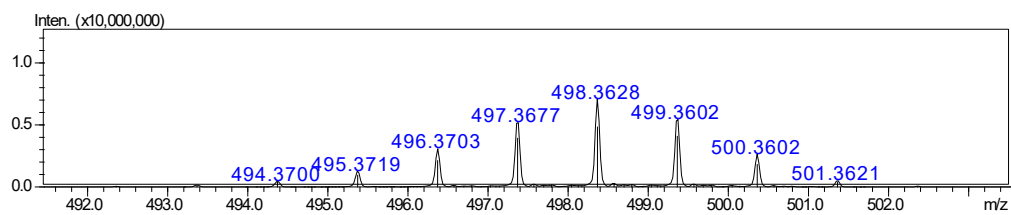

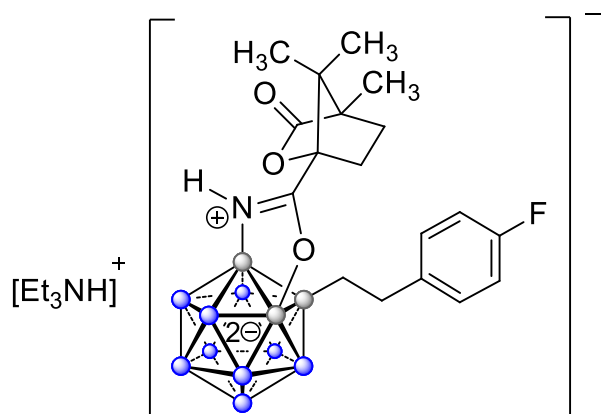

High resolution ESI-MS (negative mode, MeOH):  
 for [C<sub>18</sub>H<sub>31</sub>B<sub>12</sub>FNO<sub>3</sub>]<sup>-</sup>: 458.3477; Found: 458.3480.

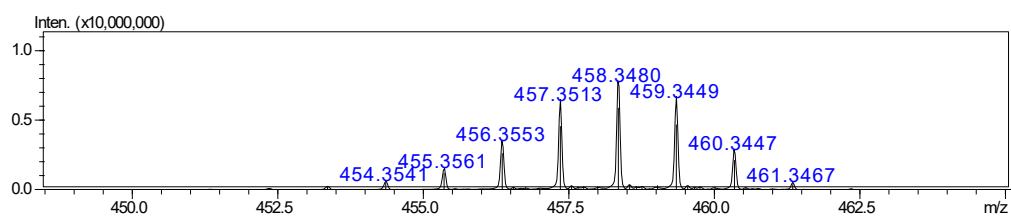

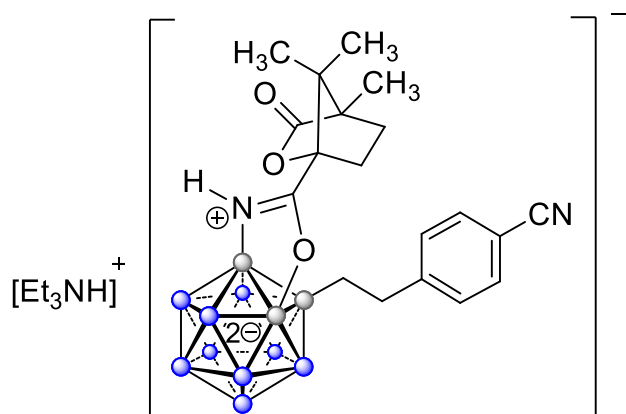

High resolution ESI-MS (negative mode, MeOH):  
 for  $[C_{19}H_{31}B_{12}N_2O_3]^-$ : 465.3524; Found: 465.3531.

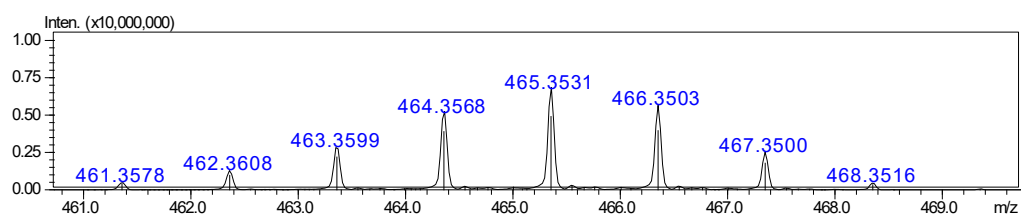

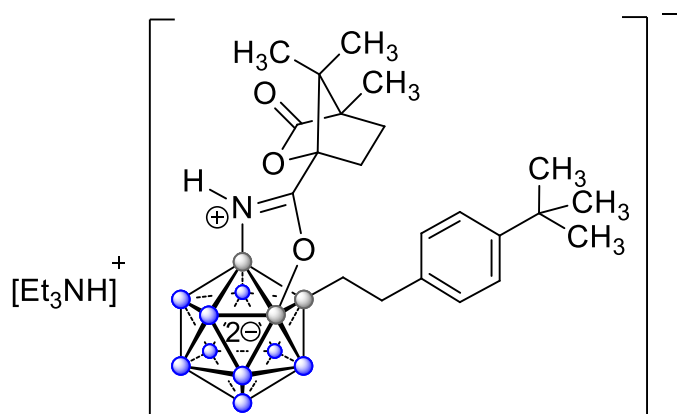

High resolution ESI-MS (negative mode, MeOH):  
 for  $[\text{C}_{22}\text{H}_{40}\text{B}_{12}\text{NO}_3]^-$ : 496.4197; Found: 496.4202.

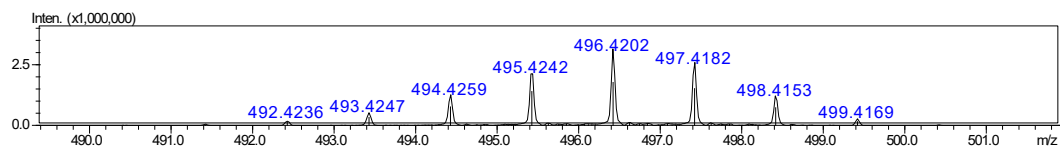

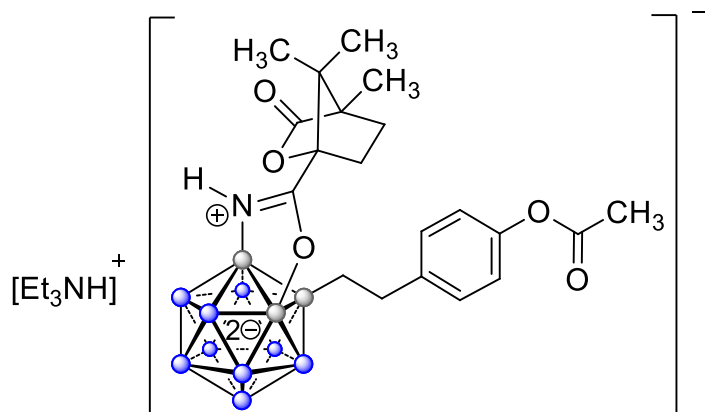

High resolution ESI-MS (negative mode, MeOH):  
 for [C<sub>20</sub>H<sub>34</sub>B<sub>12</sub>NO<sub>5</sub>]<sup>-</sup>: 498.3626; Found: 498.3632.

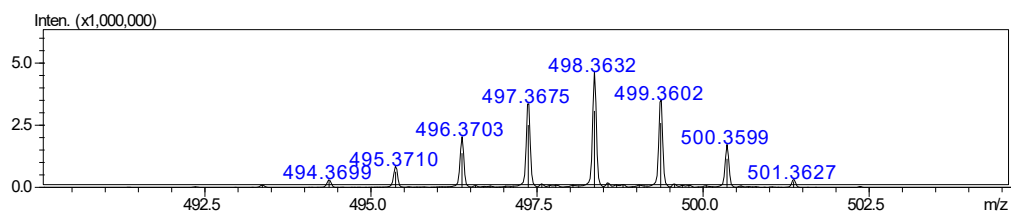



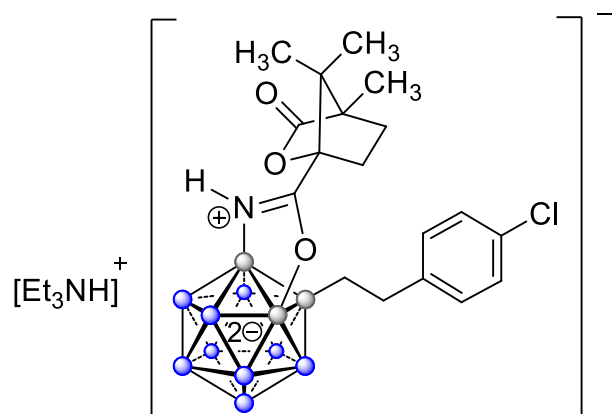

High resolution ESI-MS (negative mode, MeOH):  
 for [C<sub>18</sub>H<sub>31</sub>B<sub>12</sub>ClNO<sub>3</sub>]<sup>-</sup>: 474.3182; Found: 474.3189.

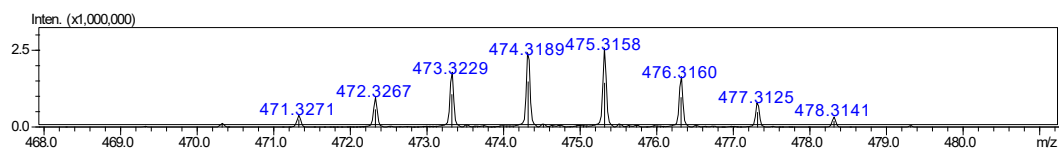

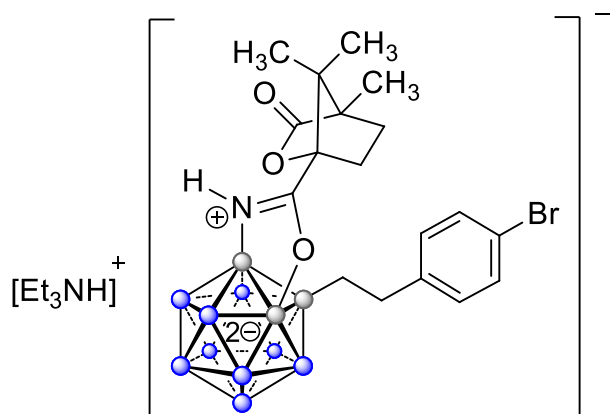

High resolution ESI-MS (negative mode, MeOH):  
 for  $[\text{C}_{18}\text{H}_{31}\text{B}_{12}\text{BrNO}_3]^-$ : 518.2677; Found: 518.2684.

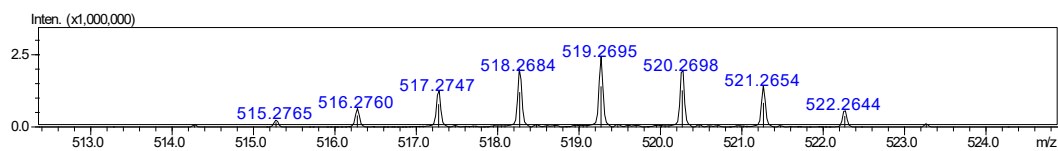

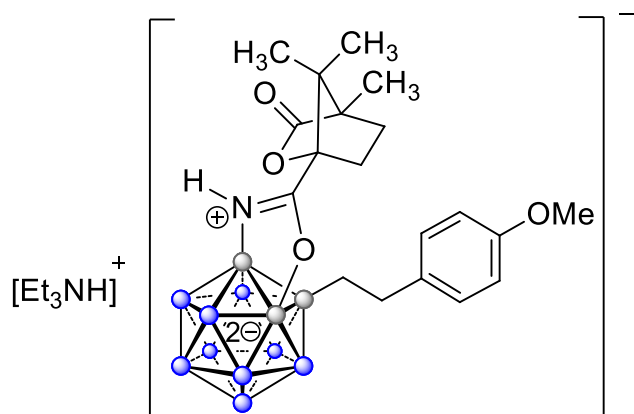

High resolution ESI-MS (negative mode, MeOH):  
for  $[\text{C}_{19}\text{H}_{34}\text{B}_{12}\text{NO}_4]^-$ : 470.3677; Found: 470.3683.

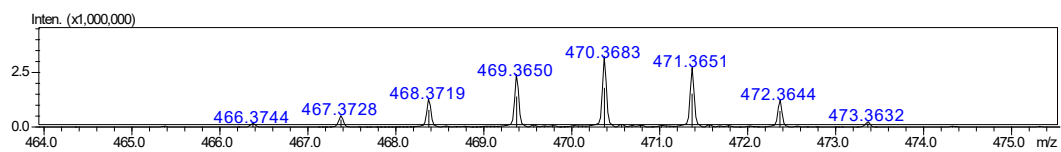

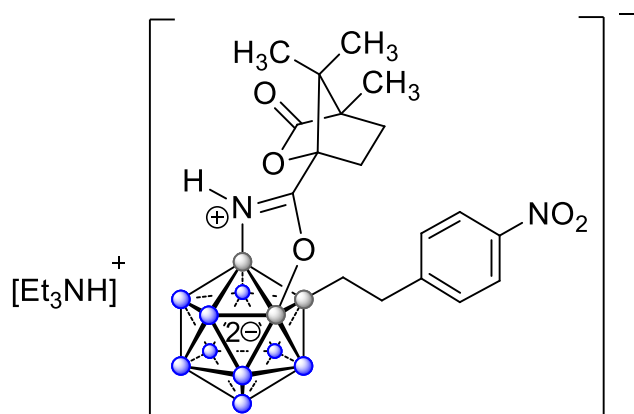

High resolution ESI-MS (negative mode, MeOH):  
 for  $[\text{C}_{18}\text{H}_{31}\text{B}_{12}\text{N}_2\text{O}_5]^-$ : 485.3422; Found: 485.3431.

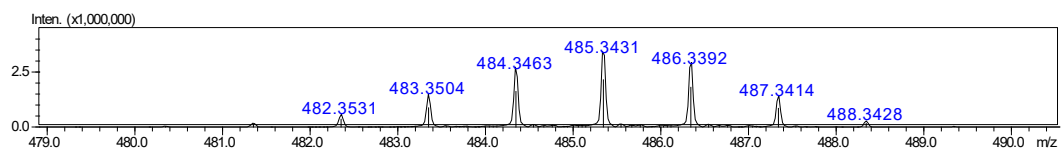

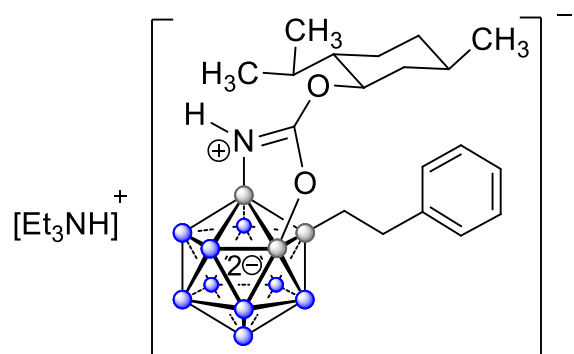

High resolution ESI-MS (negative mode, MeOH):

[C<sub>19</sub>H<sub>38</sub>B<sub>12</sub>NO<sub>2</sub>]<sup>-</sup>: 442.4092; Found: 442.4101.

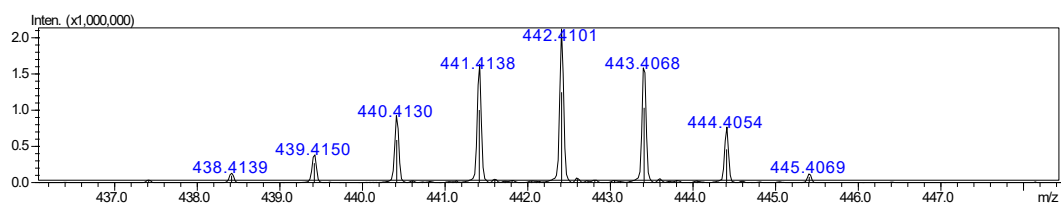

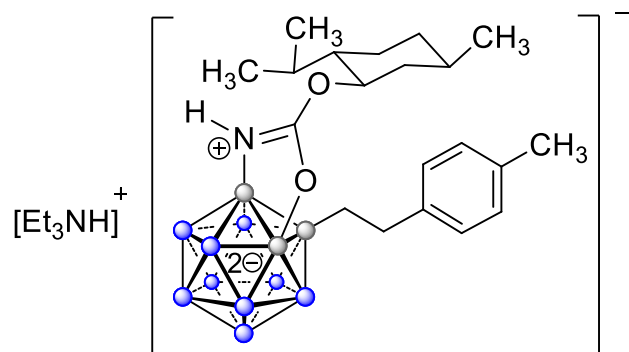

High resolution ESI-MS (negative mode, MeOH):

$[\text{C}_{20}\text{H}_{40}\text{B}_{12}\text{NO}_2]^-$ : 456.4248; Found: 456.4256.

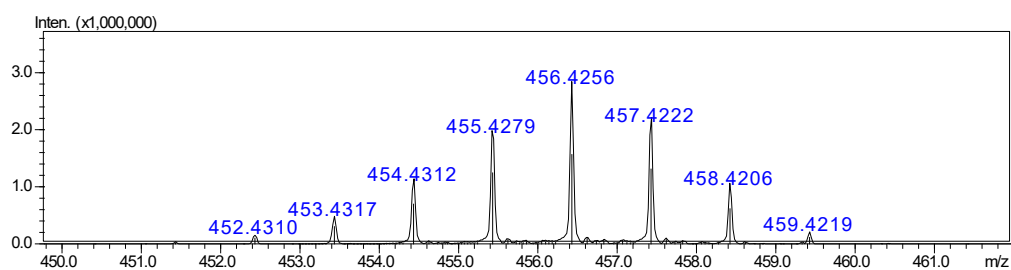

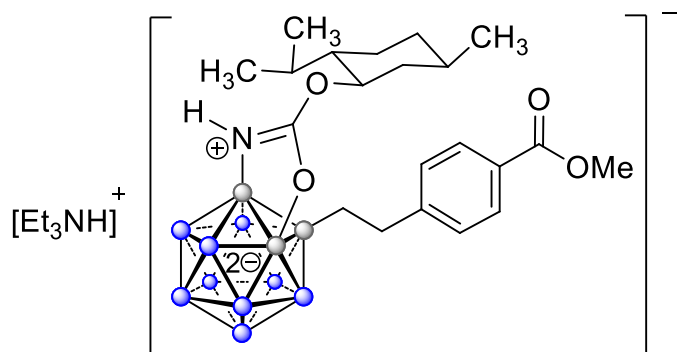

High resolution ESI-MS (negative mode, MeOH):

$[\text{C}_{21}\text{H}_{40}\text{B}_{12}\text{NO}_4]^-$ : 500.4146 ; Found: 500.4149

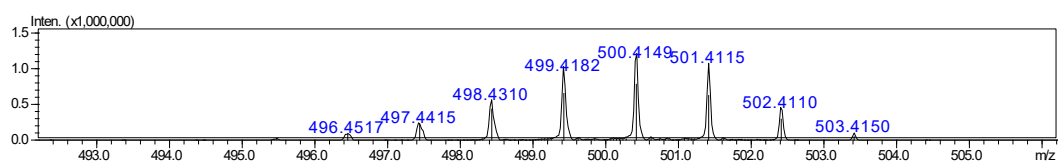

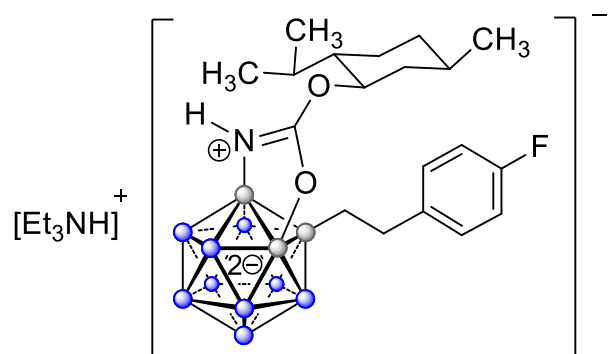

High resolution ESI-MS (negative mode, MeOH):

[C<sub>19</sub>H<sub>37</sub>B<sub>12</sub>FNO<sub>2</sub>]<sup>-</sup>: 460.3998; Found: 460.4005.

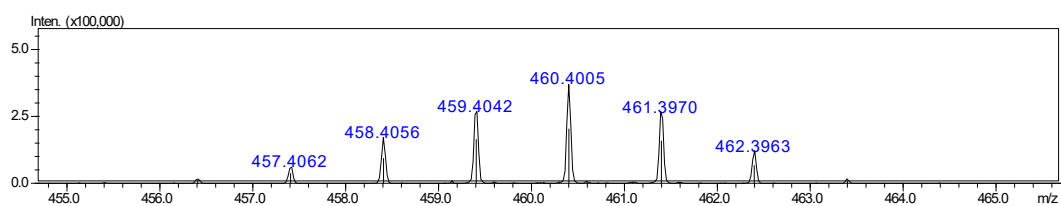



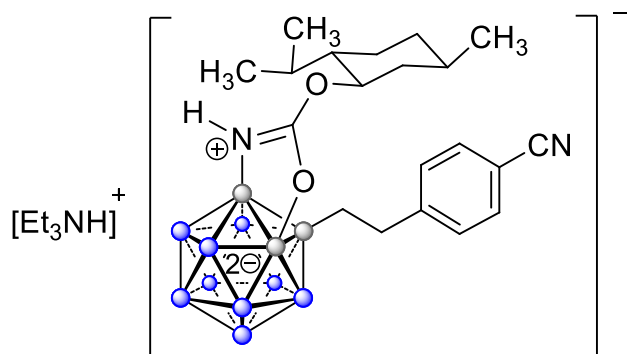

High resolution ESI-MS (negative mode, MeOH):

[C<sub>20</sub>H<sub>37</sub>B<sub>12</sub>N<sub>2</sub>O<sub>2</sub>]<sup>-</sup>: 467.4044; Found: 467.4053.

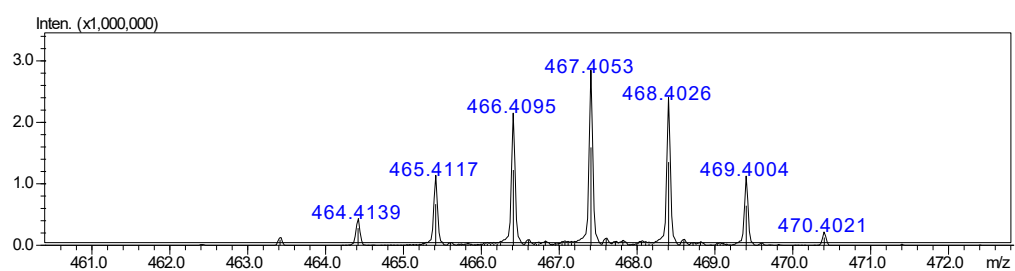

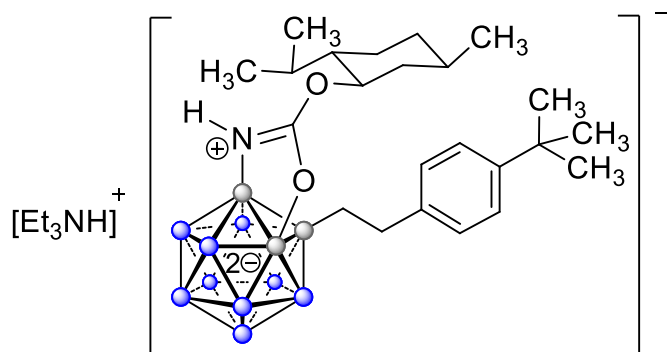

High resolution ESI-MS (negative mode, MeOH):

$[\text{C}_{23}\text{H}_{46}\text{B}_{12}\text{NO}_2]^-$ : 498.4718; Found: 498.4722.

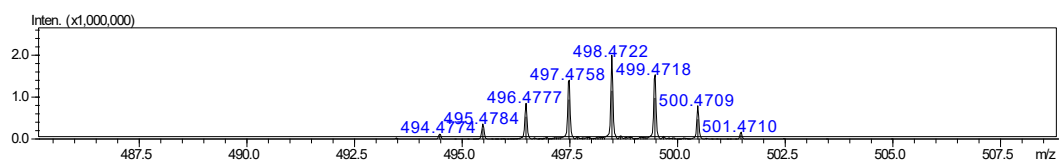

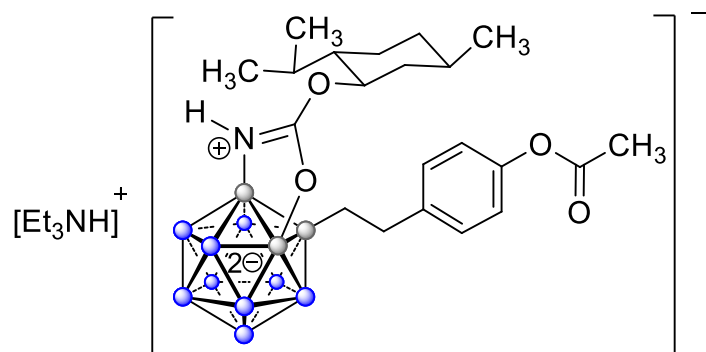

High resolution ESI-MS (negative mode, MeOH):

for  $[\text{C}_{21}\text{H}_{40}\text{B}_{12}\text{NO}_4]^-$ : 500.4147; Found: 500.4149.

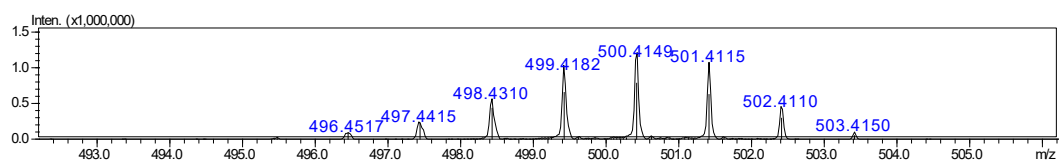

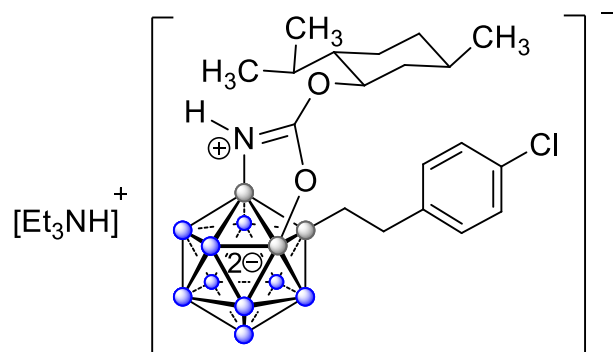

High resolution ESI-MS (negative mode, MeOH):  
 for  $[\text{C}_{19}\text{H}_{37}\text{B}_{12}\text{ClNO}_2]^-$ : 476.3702; Found: 476.3707.

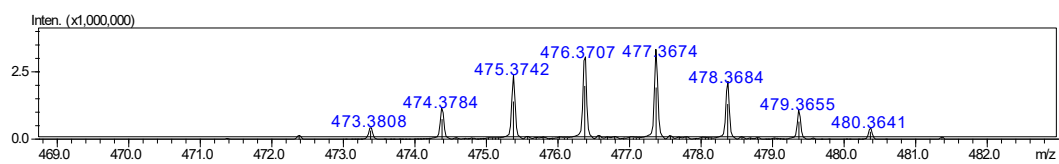

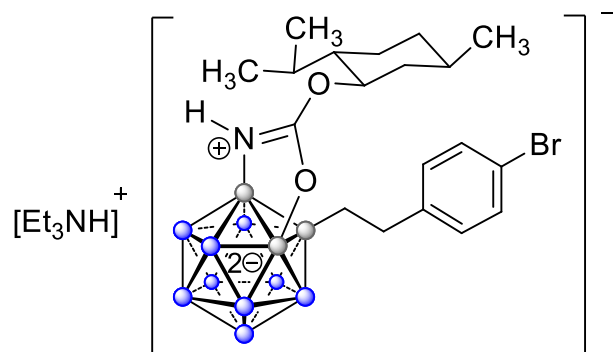

High resolution ESI-MS (negative mode, MeOH):  
 for  $[\text{C}_{19}\text{H}_{37}\text{B}_{12}\text{BrNO}_2]^-$ : 520.3197; Found: 520.3204.

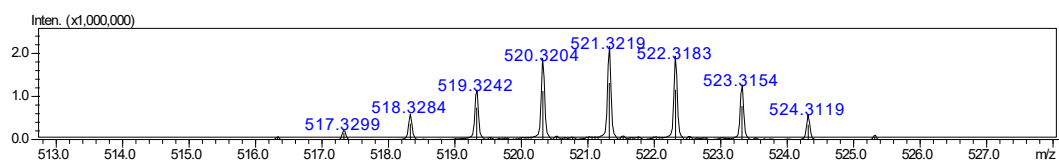

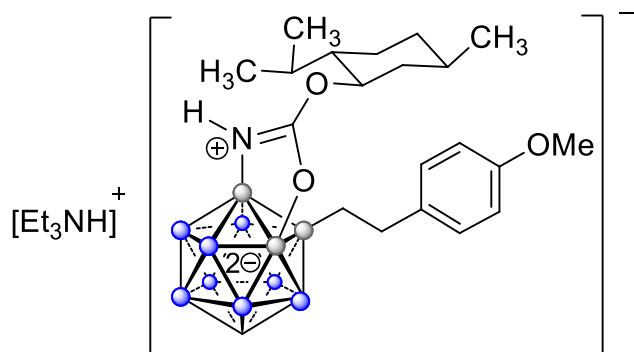

High resolution ESI-MS (negative mode, MeOH):

for  $[\text{C}_{20}\text{H}_{40}\text{B}_{12}\text{NO}_3]^-$ : 472.4197; Found: 472.4206.

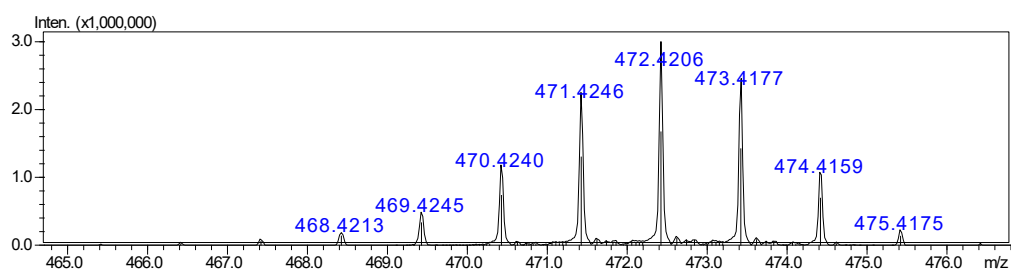

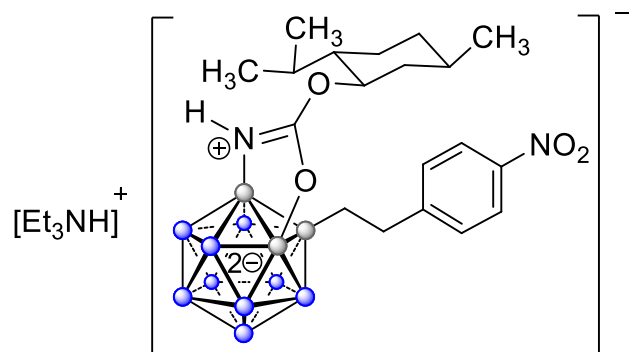

High resolution ESI-MS (negative mode, MeOH):  
 for  $[\text{C}_{19}\text{H}_{37}\text{B}_{12}\text{N}_2\text{O}_4]^-$ : 487.3943; Found: 487.3951.

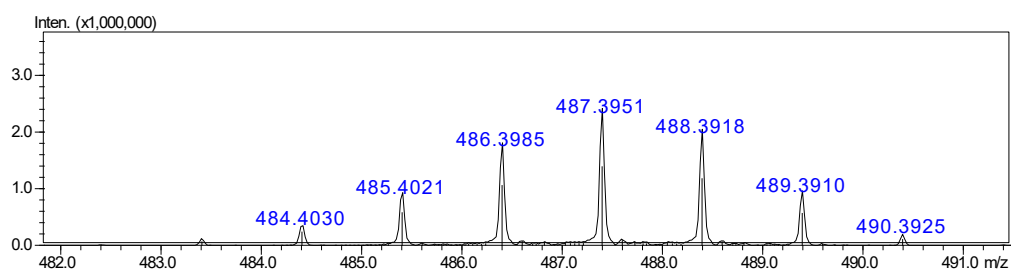

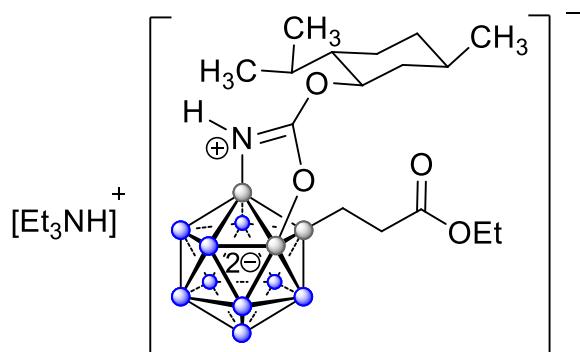

High resolution ESI-MS (negative mode, MeOH):

for [C<sub>16</sub>H<sub>38</sub>B<sub>12</sub>NO<sub>4</sub>]<sup>-</sup>: 438.3990; Found: 438.3998.

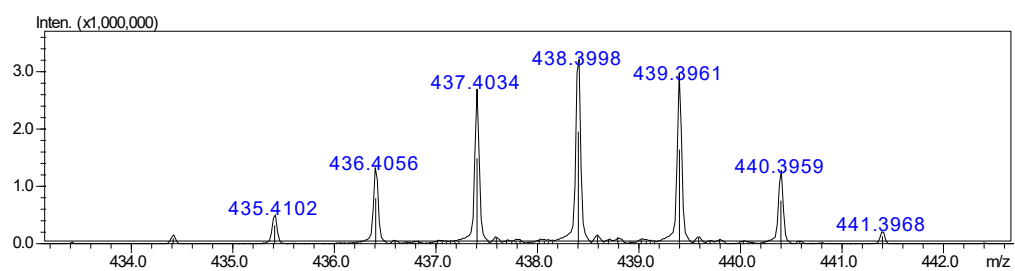



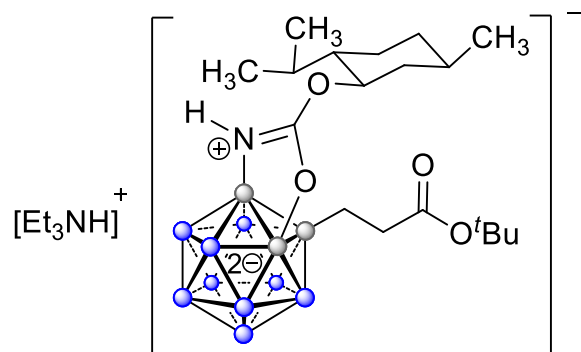

High resolution ESI-MS (negative mode, MeOH):  
 for [C<sub>18</sub>H<sub>42</sub>B<sub>12</sub>NO<sub>4</sub>]<sup>-</sup>: 466.4303; Found: 466.4309.

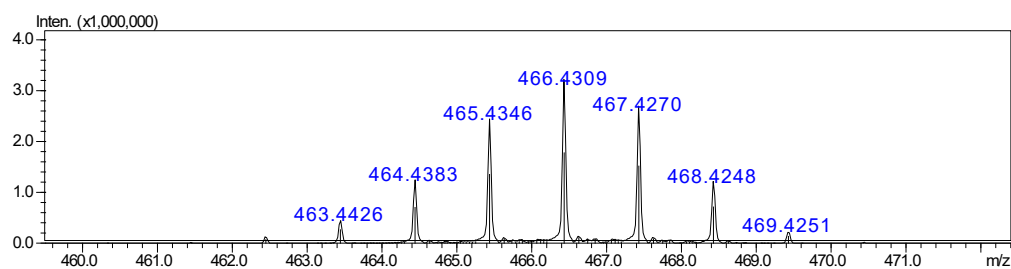

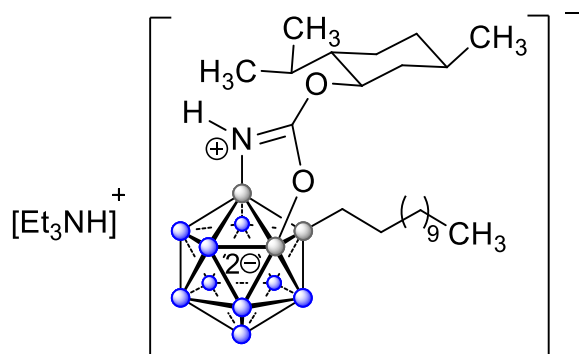

High resolution ESI-MS (negative mode, MeOH):

for [C<sub>23</sub>H<sub>54</sub>B<sub>12</sub>NO<sub>2</sub>]<sup>-</sup>: 506.5344; Found: 506.5353.

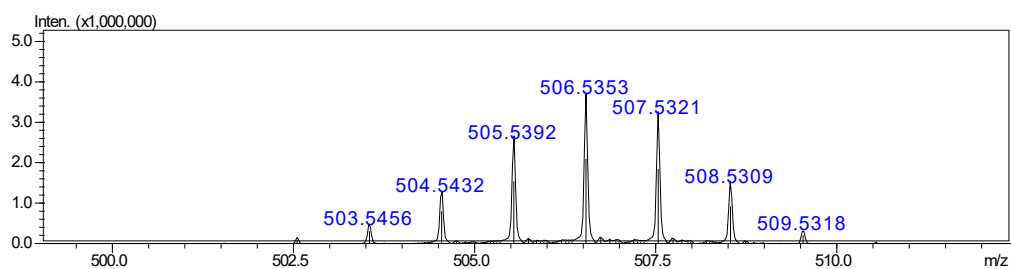

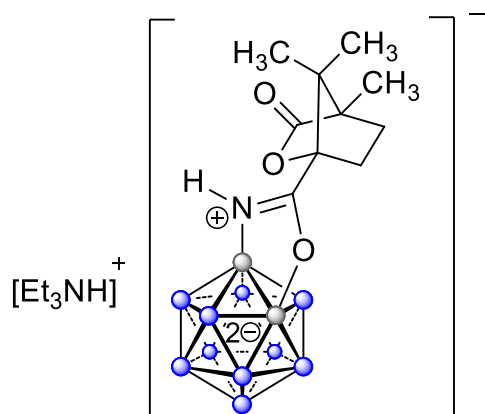

High resolution ESI-MS (negative mode, MeOH):  
 for [C<sub>10</sub>H<sub>24</sub>B<sub>12</sub>NO<sub>3</sub>]<sup>-</sup>: 336.2945; Found: 336.2951.

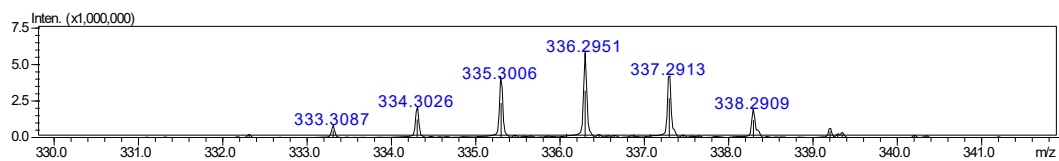

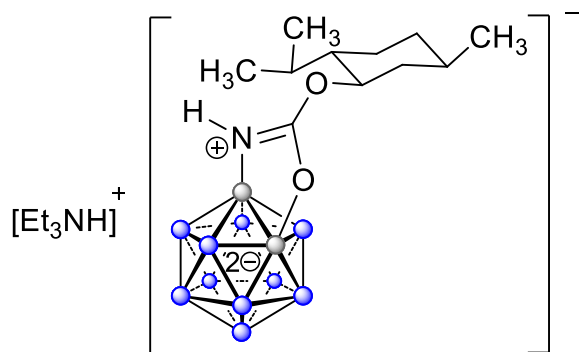

High resolution ESI-MS (negative mode, MeOH):

for [C<sub>11</sub>H<sub>30</sub>B<sub>12</sub>NO<sub>2</sub>]<sup>-</sup>: 338.3466; Found: 338.3471.

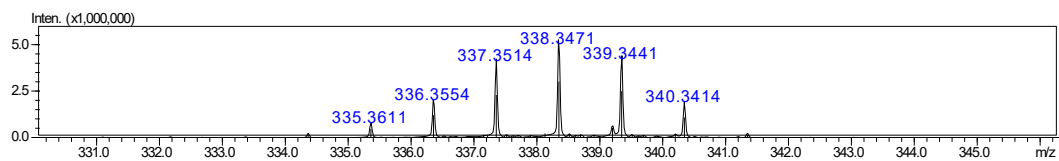

Supplement: oc1c01132_si_001.pdf [file oc1c01132_si_001.pdf]
